# Supplementary material for: Changes of the Proteome and Acetylome during Transition into the Stationary Phase in the Organohalide-Respiring Dehalococcoides mccartyi Strain CBDB1
Source: Microorganisms. 2021 Feb 12;9(2):365. doi: 10.3390/microorganisms9020365 (PMC7918482; doi:10.3390/microorganisms9020365)
Supplement: Supplementary file 1 [file microorganisms-09-00365-s001.zip › Table_S2_Exp1_protein_abundances,acetylated_peptides.xlsx]

## Sheet: manual
Table S2. This table collects the basic proteomic and acetylomic datasets from all samples of experiment 1. Sheet A lists the protein abundances of the exponential and the stationary phase. Protein abundances correspond to the average of the top three peptide MS1-areas. Values were median-normalized, logarithmized (log10), the minimum value was set to 0 and all other protein abundances were adjus…
Id. = protein was identified in ≥1 triplicates or quantified in 1 triplicate
n.d. = protein or acetylated peptide was not identified in any of the replicates

## Sheet: A
Accession	locus tag	Description	protein abundance (log10 fold change of median)		standard deviation		Pathway
			Proteome		Proteome
			exp	stat	exp	stat
Q3ZYW8	cbdbA1393	60 kDa chaperonin OS=Dehalococcoides mccartyi (strain CBDB1) GN=groL PE=3 SV=1	4.10673	3.86218	0.0694674	0.0402135	Folding, sorting and degradation; Translation; Transport and catabolism
Q3ZX00	cbdbA587	DNA-directed RNA polymerase subunit beta' OS=Dehalococcoides mccartyi (strain CBDB1) GN=rpoC PE=3 SV=1	3.04346	2.75562	0.0498057	0.026073	Nucleotide metabolism; Replication and repair; Transcription
Q3ZXB4	cbdbA727	Uncharacterized protein OS=Dehalococcoides mccartyi (strain CBDB1) GN=cbdbA727 PE=4 SV=1	3.37846	3.1596	0.0283864	0.0563757
Q3ZY60	cbdbA1077	Acetyl-CoA synthetase OS=Dehalococcoides mccartyi (strain CBDB1) GN=cbdbA1077 PE=4 SV=1	3.27063	3.05064	0.0482281	0.0456141
Q3ZWQ7	cbdbA195	Formate dehydrogenase, major subunit OS=Dehalococcoides mccartyi (strain CBDB1) GN=OmeA PE=4 SV=1	3.67375	3.3429	0.0370988	0.0317751	Carbohydrate metabolism; Energy metabolism
Q3ZX01	cbdbA586	DNA-directed RNA polymerase subunit beta OS=Dehalococcoides mccartyi (strain CBDB1) GN=rpoB PE=3 SV=1	3.00087	2.86044	0.0398136	0.0278903	Nucleotide metabolism; Replication and repair; Transcription
Q3ZZG5	cbdbA388	Protein translocase subunit SecA OS=Dehalococcoides mccartyi (strain CBDB1) GN=secA PE=3 SV=1	2.50336	2.70886	0.0537518	0.021638	Cellular community - prokaryotes; Folding, sorting and degradation; Membrane transport
Q3ZWG0	cbdbA80	Putative reductive dehalogenase OS=Dehalococcoides mccartyi (strain CBDB1) GN=rdhA PE=4 SV=1	4.14761	3.97058	0.1388	0.0833703
Q3ZYV1	cbdbA1358	Chaperone protein DnaK OS=Dehalococcoides mccartyi (strain CBDB1) GN=dnaK PE=3 SV=1	3.64347	3.53174	0.0568258	0.0303835	Folding, sorting and degradation; Membrane transport; Translation; Transport and catabolism
Q3ZXX3	cbdbA960	Elongation factor Tu OS=Dehalococcoides mccartyi (strain CBDB1) GN=tuf PE=3 SV=1	4.07667	3.81248	0.0507808	0.0176114	Translation; Transport and catabolism
Q3ZZU6	cbdbA529	Phosphoenolpyruvate synthase OS=Dehalococcoides mccartyi (strain CBDB1) GN=ppsA PE=3 SV=1	2.97715	2.84192	0.0232168	0.0356594	Carbohydrate metabolism; Energy metabolism
Q3ZWL5	cbdbA129	Ni/Fe hydrogenase large subunit OS=Dehalococcoides mccartyi (strain CBDB1) GN=hupL PE=3 SV=1	3.66968	3.49629	0.00737729	0.0477934	Xenobiotics biodegradation and metabolism
Q3ZZM6	cbdbA437	Elongation factor G OS=Dehalococcoides mccartyi (strain CBDB1) GN=fusA PE=3 SV=1	2.93204	2.92906	0.0573113	0.0168172	Translation
Q3ZYF7	cbdbA1187	DAK2 domain protein OS=Dehalococcoides mccartyi (strain CBDB1) GN=cbdbA1187 PE=4 SV=1	2.61132	2.78407	0.0439617	0.0456361	Poorly characterized
Q3ZY23	cbdbA1008	Tryptophan synthase beta chain OS=Dehalococcoides mccartyi (strain CBDB1) GN=trpB PE=3 SV=1	3.69316	3.3655	0.0273414	0.047293	Amino acid metabolism
Q3ZX66	cbdbA684	Putative [Fe] hydrogenase, HymB subunit OS=Dehalococcoides mccartyi (strain CBDB1) GN=hymB PE=4 SV=1	3.12646	2.93919	0.0052834	0.0289938	Energy metabolism
Q3ZYE3	cbdbA1142	Uncharacterized protein OS=Dehalococcoides mccartyi (strain CBDB1) GN=cbdbA1142 PE=4 SV=1	3.37802	3.34411	0.112308	0.0155941	Carbohydrate metabolism; Energy metabolism
Q3ZYA7	cbdbA1130	Translation elongation factor G OS=Dehalococcoides mccartyi (strain CBDB1) GN=fusA PE=4 SV=1	2.69069	2.50234	0.0180707	0.0196836	Translation
Q3ZYT8	cbdbA1374	ATP-dependent Clp protease, ATP-binding subunit ClpC OS=Dehalococcoides mccartyi (strain CBDB1) GN=clpA PE=3 SV=1	2.80236	2.63963	0.0289973	0.0238645	Folding, sorting and degradation
Q3ZX05	cbdbA580	D-3-phosphoglycerate dehydrogenase OS=Dehalococcoides mccartyi (strain CBDB1) GN=serA PE=3 SV=1	3.20743	3.11781	0.0481099	0.0217331	Amino acid metabolism; Energy metabolism; Transport and catabolism
Q3ZWB9	cbdbA70	ATP-dependent Clp protease, ATP-binding subunit OS=Dehalococcoides mccartyi (strain CBDB1) GN=clpC PE=3 SV=1	2.73541	2.60609	0.0213905	0.038489	Folding, sorting and degradation
Q3ZVV7	cbdbA1568	Glutamine synthetase OS=Dehalococcoides mccartyi (strain CBDB1) GN=glnA PE=3 SV=1	3.35524	3.21232	0.0126365	0.0558801	Amino acid metabolism; Carbohydrate metabolism; Cell growth and death; Energy metabolism; Signal transduction; Transport and catabolism
Q3ZXV6	cbdbA932	Polyribonucleotide nucleotidyltransferase OS=Dehalococcoides mccartyi (strain CBDB1) GN=pnp PE=3 SV=1	3.32277	3.09822	0.034219	0.0303356	Folding, sorting and degradation; Nucleotide metabolism; Translation
Q3ZWF5	cbdbA84	Putative reductive dehalogenase OS=Dehalococcoides mccartyi (strain CBDB1) GN=rdhA PE=4 SV=1	3.53379	3.40385	0.00455826	0.0444863
Q3ZY09	cbdbA1024	Conserved domain protein OS=Dehalococcoides mccartyi (strain CBDB1) GN=cbdbA1024 PE=4 SV=1	3.07862	2.82115	0.0523264	0.0355317
Q3ZZT7	cbdbA538	ATP synthase subunit beta OS=Dehalococcoides mccartyi (strain CBDB1) GN=atpD PE=3 SV=1	3.7188	3.46357	0.107748	0.0283888	Energy metabolism
Q3ZX83	cbdbA664	Trigger factor OS=Dehalococcoides mccartyi (strain CBDB1) GN=tig PE=3 SV=1	3.2428	2.97862	0.0821819	0.0608191	Genetic information processing
Q3ZZD2	cbdbA308	Phenylalanine--tRNA ligase beta subunit OS=Dehalococcoides mccartyi (strain CBDB1) GN=pheT PE=3 SV=1	2.61748	2.61342	0.0272905	0.0677607	Amino acid metabolism; Translation
Q3ZZA0	cbdbA287	Ribonucleotide reductase OS=Dehalococcoides mccartyi (strain CBDB1) GN=nrdA PE=4 SV=1	2.66333	2.55854	0.0591256	0.0762439	Nucleotide metabolism; Replication and repair
Q3ZZX1	cbdbA1728	DNA gyrase subunit A OS=Dehalococcoides mccartyi (strain CBDB1) GN=gyrA PE=3 SV=1	2.73145	2.634	0.0366106	0.0193934	Replication and repair
Q3ZWC3	cbdbA65	Alanine--tRNA ligase OS=Dehalococcoides mccartyi (strain CBDB1) GN=alaS PE=3 SV=1	2.08774	2.37815	0.109648	0.0567999	Amino acid metabolism; Translation
Q3ZWM9	cbdbA171	Putative [Fe] hydrogenase, large subunit HymC OS=Dehalococcoides mccartyi (strain CBDB1) GN=hymC PE=4 SV=1	2.80599	2.66675	0.0210931	0.0356394	Metabolism
Q3ZWK4	cbdbA143	Pyridine nucleotide-disulphide oxidoreductase family protein OS=Dehalococcoides mccartyi (strain CBDB1) GN=cbdbA143 PE=4 SV=1	3.0868	2.87326	0.0699281	0.0672431
Q3ZXI2	cbdbA811	Ketol-acid reductoisomerase OS=Dehalococcoides mccartyi (strain CBDB1) GN=ilvC PE=3 SV=1	3.40707	3.34349	0.0634858	0.0484598	Amino acid metabolism; Metabolism of cofactors and vitamins
Q3ZWW6	cbdbA568	GTPase domain protein OS=Dehalococcoides mccartyi (strain CBDB1) GN=cbdbA568 PE=4 SV=1	3.43903	3.31344	0.0238965	0.0156767
Q3ZWQ1	cbdbA202	Leucine--tRNA ligase OS=Dehalococcoides mccartyi (strain CBDB1) GN=leuS PE=3 SV=1	2.39697	2.38052	0.183543	0.0485419	Amino acid metabolism; Translation
Q3ZXU7	cbdbA943	Myo-inositol-1-phosphate synthase family protein OS=Dehalococcoides mccartyi (strain CBDB1) GN=cbdbA943 PE=4 SV=1	3.42945	3.43574	0.0871586	0.00412733	Biosynthesis of other secondary metabolites; Carbohydrate metabolism
Q3ZWZ1	cbdbA597	Hydrogenase, group 3, VhuA subunit OS=Dehalococcoides mccartyi (strain CBDB1) GN=cbdbA597 PE=3 SV=1	2.94556	2.94214	0.0251221	0.0608384	Metabolism
Q3ZXJ6	cbdbA794	Iron-regulated ABC transporter, subunit SufB-related OS=Dehalococcoides mccartyi (strain CBDB1) GN=sufB PE=4 SV=1	2.89253	2.81604	0.0397956	0.00554286	Poorly characterized
Q3ZYX9	cbdbA1381	Bifunctional purine biosynthesis protein PurH OS=Dehalococcoides mccartyi (strain CBDB1) GN=purH PE=3 SV=1	2.71364	2.7085	0.112013	0.0202473	Drug resistance; Metabolism of cofactors and vitamins; Nucleotide metabolism; Transport and catabolism
Q3ZYB7	cbdbA1118	Carbamoyl-phosphate synthase, large subunit OS=Dehalococcoides mccartyi (strain CBDB1) GN=carB PE=3 SV=1	2.51688	2.44239	0.0228802	0.0190198	Amino acid metabolism; Nucleotide metabolism
Q3ZXB3	cbdbA728	Uncharacterized protein OS=Dehalococcoides mccartyi (strain CBDB1) GN=cbdbA728 PE=4 SV=1	3.14659	2.879	0.0178002	0.0403164
Q3ZXP7	cbdbA846	Hydrogenase subunit HymB OS=Dehalococcoides mccartyi (strain CBDB1) GN=cbdbA846 PE=4 SV=1	2.78669	2.62967	0.0724068	0.042254	Energy metabolism
Q3ZXI3	cbdbA808	2-isopropylmalate synthase OS=Dehalococcoides mccartyi (strain CBDB1) GN=leuA PE=3 SV=1	2.77886	2.65685	0.0589403	0.00389047	Amino acid metabolism; Carbohydrate metabolism
Q3ZYF0	cbdbA1196	Arginine--tRNA ligase OS=Dehalococcoides mccartyi (strain CBDB1) GN=argS PE=3 SV=1	2.27126	2.39667	0.0161944	0.0295065	Amino acid metabolism; Translation
Q3ZZN0	cbdbA432	Phospho-2-dehydro-3-deoxyheptonate aldolase OS=Dehalococcoides mccartyi (strain CBDB1) GN=aroF PE=4 SV=1	3.5885	3.60656	0.0547277	0.0121544	Amino acid metabolism
Q3ZX07	cbdbA578	Uncharacterized protein OS=Dehalococcoides mccartyi (strain CBDB1) GN=cbdbA578 PE=4 SV=1	2.75473	2.87486	0.0685754	0.0233551
Q3ZYU4	cbdbA1368	Conserved domain protein OS=Dehalococcoides mccartyi (strain CBDB1) GN=cbdbA1368 PE=4 SV=1	4.50034	4.20855	0.129328	0.0382996
Q3ZZN6	cbdbA477	Adenosylhomocysteinase OS=Dehalococcoides mccartyi (strain CBDB1) GN=ahcY PE=3 SV=1	3.24027	3.10682	0.0208284	0.0381696	Amino acid metabolism; Enzyme families; Transport and catabolism
Q3ZXB5	cbdbA726	Threonine--tRNA ligase OS=Dehalococcoides mccartyi (strain CBDB1) GN=thrS PE=3 SV=1	2.60413	2.60637	0.017828	0.00338422	Amino acid metabolism; Translation
Q3ZXU3	cbdbA947	Translation initiation factor IF-2 OS=Dehalococcoides mccartyi (strain CBDB1) GN=infB PE=3 SV=1	2.30897	2.48438	0.0349592	0.0231034	Translation
Q3ZX11	cbdbA573	Enolase OS=Dehalococcoides mccartyi (strain CBDB1) GN=eno PE=3 SV=1	2.24168	2.49125	0.0977395	0.0783682	Carbohydrate metabolism; Energy metabolism; Folding, sorting and degradation; Signal transduction; Translation; Transport and catabolism
Q3ZX45	cbdbA652	Carbon monoxide dehydrogenase, alpha subunit OS=Dehalococcoides mccartyi (strain CBDB1) GN=codH PE=4 SV=1	2.7181	2.7348	0.042963	0.0242565	Energy metabolism
Q3ZZD0	cbdbA310	Proline--tRNA ligase OS=Dehalococcoides mccartyi (strain CBDB1) GN=proS PE=3 SV=1	2.47237	2.61766	0.048267	0.0296499	Amino acid metabolism; Translation
Q3ZW82	cbdbA1702	Ribonuclease Y OS=Dehalococcoides mccartyi (strain CBDB1) GN=rny PE=3 SV=1	2.3645	2.47398	0.203745	0.0643795	Folding, sorting and degradation; Translation
Q3ZZ78	cbdbA1520	Uncharacterized protein OS=Dehalococcoides mccartyi (strain CBDB1) GN=cbdbA1520 PE=4 SV=1	2.85014	2.77621	0.0789538	0.0491271	Transport and catabolism
Q3ZZN1	cbdbA431	3-dehydroquinate synthase OS=Dehalococcoides mccartyi (strain CBDB1) GN=aroB PE=3 SV=1	3.45869	3.28103	0.0334297	0.0165598	Amino acid metabolism
Q3ZX69	cbdbA681	Pyruvic-ferredoxin oxidoreductase, alpha subunit OS=Dehalococcoides mccartyi (strain CBDB1) GN=porA PE=4 SV=1	3.095	3.05548	0.0672668	0.020196	Carbohydrate metabolism; Energy metabolism; Xenobiotics biodegradation and metabolism
Q3ZZG3	cbdbA390	Serine hydroxymethyltransferase OS=Dehalococcoides mccartyi (strain CBDB1) GN=glyA PE=3 SV=1	3.028	2.93453	0.00947127	0.0550211	Amino acid metabolism; Carbohydrate metabolism; Drug resistance; Energy metabolism; Metabolism of cofactors and vitamins; Metabolism of other amino acids
Q3ZZN7	cbdbA476	S-adenosylmethionine synthase OS=Dehalococcoides mccartyi (strain CBDB1) GN=metK PE=3 SV=1	3.28463	3.14664	0.0618802	0.0241096	Amino acid metabolism
Q3ZZB5	cbdbA329	IMP dehydrogenase family protein OS=Dehalococcoides mccartyi (strain CBDB1) GN=cbdbA329 PE=3 SV=1	2.7644	2.77238	0.111232	0.0390472	Nucleotide metabolism; Transport and catabolism; Xenobiotics biodegradation and metabolism
Q3ZX75	cbdbA674	DNA topoisomerase 1 OS=Dehalococcoides mccartyi (strain CBDB1) GN=topA PE=3 SV=1	2.57729	2.54089	0.0228967	0.0238679	Replication and repair
Q3ZXU1	cbdbA949	N utilization substance protein A OS=Dehalococcoides mccartyi (strain CBDB1) GN=nusA PE=3 SV=1	2.82976	2.66553	0.0415776	0.0360118	Transcription; Translation
Q3ZWL3	cbdbA131	Putative Ni/Fe hydrogenase, iron-sulfur cluster-binding subunit OS=Dehalococcoides mccartyi (strain CBDB1) GN=hupX PE=4 SV=1	3.46276	3.33414	0.0858487	0.0534252	Carbohydrate metabolism; Energy metabolism
Q3ZY35	cbdbA1050	Glutamine synthetase, type I OS=Dehalococcoides mccartyi (strain CBDB1) GN=glnA PE=3 SV=1	2.49138	2.67703	0.117482	0.044605	Amino acid metabolism; Carbohydrate metabolism; Cell growth and death; Energy metabolism; Signal transduction; Transport and catabolism
Q3ZZI4	cbdbA393	DNA translocase FtsK OS=Dehalococcoides mccartyi (strain CBDB1) GN=ftsK PE=4 SV=1	2.37654	2.20372	0.0951311	0.0967578	Replication and repair
Q3ZW87	cbdbA4	DNA gyrase subunit B OS=Dehalococcoides mccartyi (strain CBDB1) GN=gyrB PE=3 SV=1	2.45071	2.48472	0.0761334	0.0511986	Replication and repair
Q3ZXI8	cbdbA803	2-isopropylmalate synthase OS=Dehalococcoides mccartyi (strain CBDB1) GN=cbdbA803 PE=3 SV=1	2.93792	2.74071	0.0261259	0.0286165	Amino acid metabolism; Carbohydrate metabolism
Q3ZXY4	cbdbA1001	Probable cytosol aminopeptidase OS=Dehalococcoides mccartyi (strain CBDB1) GN=pepA PE=3 SV=1	2.85492	2.77934	0.06587	0.0504857	Enzyme families; Metabolism of other amino acids
Q3ZXV0	cbdbA939	Adenylosuccinate synthetase OS=Dehalococcoides mccartyi (strain CBDB1) GN=purA PE=3 SV=1	2.61323	2.68293	0.102669	0.0331447	Amino acid metabolism; Nucleotide metabolism
Q3ZZC1	cbdbA322	30S ribosomal protein S2 OS=Dehalococcoides mccartyi (strain CBDB1) GN=rpsB PE=3 SV=1	3.17233	3.10847	0.0170465	0.0176408	Translation
Q3ZYB0	cbdbA1126	Acetyl-CoA synthetase OS=Dehalococcoides mccartyi (strain CBDB1) GN=acs PE=4 SV=1	3.04217	2.91736	0.0391386	0.0719787	Carbohydrate metabolism; Energy metabolism; Lipid metabolism
Q3ZZP6	cbdbA466	DNA-directed RNA polymerase subunit alpha OS=Dehalococcoides mccartyi (strain CBDB1) GN=rpoA PE=3 SV=1	3.02278	2.90008	0.00730925	0.0425322	Nucleotide metabolism; Replication and repair; Transcription
Q3ZWB3	cbdbA11	Branched-chain amino acid aminotransferase OS=Dehalococcoides mccartyi (strain CBDB1) GN=ilvE PE=3 SV=1	2.7325	2.74116	0.0248254	0.0189898	Amino acid metabolism; Metabolism of cofactors and vitamins
Q3ZZF9	cbdbA339	ATP-dependent zinc metalloprotease FtsH OS=Dehalococcoides mccartyi (strain CBDB1) GN=ftsH PE=3 SV=1	2.7209	2.57661	0.158149	0.0621855	Enzyme families; Folding, sorting and degradation
Q3ZZG9	cbdbA384	Valine--tRNA ligase OS=Dehalococcoides mccartyi (strain CBDB1) GN=valS PE=3 SV=1	2.39421	2.32428	0.0470015	0.0413678	Amino acid metabolism; Translation
Q3ZZG1	cbdbA392	Metallo-beta-lactamase family protein OS=Dehalococcoides mccartyi (strain CBDB1) GN=cbdbA392 PE=4 SV=1	2.49406	2.58409	0.084469	0.0172542	Folding, sorting and degradation; Translation
Q3ZXM1	cbdbA821	Adenylosuccinate lyase OS=Dehalococcoides mccartyi (strain CBDB1) GN=purB PE=3 SV=1	2.61807	2.5999	0.0463506	0.0263335	Amino acid metabolism; Nucleotide metabolism
Q3ZZT9	cbdbA536	ATP synthase subunit alpha OS=Dehalococcoides mccartyi (strain CBDB1) GN=atpA PE=3 SV=1	3.53987	3.28121	0.0941962	0.0275922	Energy metabolism
Q3ZYU3	cbdbA1369	Transcription termination factor Rho OS=Dehalococcoides mccartyi (strain CBDB1) GN=rho PE=3 SV=1	2.65389	2.65938	0.0802355	0.0212672	Folding, sorting and degradation; Transcription; Translation
Q3ZZA2	cbdbA285	Cell division protein FtsZ OS=Dehalococcoides mccartyi (strain CBDB1) GN=ftsZ PE=3 SV=1	3.09284	2.89125	0.0940128	0.020817	Cell growth and death; Cell motility; Replication and repair; Transport and catabolism
Q3ZY84	cbdbA1103	Riboflavin biosynthesis protein RibBA OS=Dehalococcoides mccartyi (strain CBDB1) GN=ribA PE=3 SV=1	2.62915	2.72109	0.0535067	0.0489004	Metabolism of cofactors and vitamins
Q3ZYE1	cbdbA1145	DNA polymerase III subunit beta OS=Dehalococcoides mccartyi (strain CBDB1) GN=dnaN PE=4 SV=1	3.16221	3.22722	0.0614833	0.0310534	Nucleotide metabolism; Replication and repair
Q3ZX19	cbdbA623	Cell division protein ftsA OS=Dehalococcoides mccartyi (strain CBDB1) GN=ftsA PE=3 SV=1	3.20043	3.06462	0.0433556	0.0405491	Cell growth and death; Cell motility; Replication and repair
Q3ZYW9	cbdbA1392	10 kDa chaperonin OS=Dehalococcoides mccartyi (strain CBDB1) GN=groS PE=3 SV=1	3.95299	3.85309	0.125501	0.0974708	Folding, sorting and degradation; Translation
Q3ZXL5	cbdbA829	ATP phosphoribosyltransferase regulatory subunit OS=Dehalococcoides mccartyi (strain CBDB1) GN=hisZ PE=3 SV=1	2.94139	2.90763	0.0935677	0.0334987	Amino acid metabolism; Translation
Q3ZWK7	cbdbA139	Oxaloacetate decarboxylase, alpha subunit OS=Dehalococcoides mccartyi (strain CBDB1) GN=oadA PE=4 SV=1	2.20264	2.4815	0.239904	0.0701478	Carbohydrate metabolism; Energy metabolism
Q3ZXI7	cbdbA804	3-isopropylmalate dehydrogenase OS=Dehalococcoides mccartyi (strain CBDB1) GN=leuB PE=3 SV=1	2.63556	2.81851	0.0840768	0.0240367	Amino acid metabolism; Carbohydrate metabolism
Q3ZZV3	cbdbA521	UvrABC system protein A OS=Dehalococcoides mccartyi (strain CBDB1) GN=uvrA PE=3 SV=1	1.84323	1.93744	0.0964019	0.0631989	Replication and repair
Q3ZWI1	cbdbA106	Restriction enzymes type I helicase subunit OS=Dehalococcoides mccartyi (strain CBDB1) GN=cbdbA106 PE=4 SV=1	1.64093	2.08525	0.0347452	0.0618378	Transport and catabolism
Q3ZZB9	cbdbA325	Phosphoribosylformylglycinamidine synthase subunit PurL OS=Dehalococcoides mccartyi (strain CBDB1) GN=purL PE=3 SV=1	2.06504	2.01261	0.0725074	0.0319584	Nucleotide metabolism
Q3ZX84	cbdbA663	Aspartate--tRNA(Asp/Asn) ligase OS=Dehalococcoides mccartyi (strain CBDB1) GN=aspS PE=3 SV=1	2.42009	2.38042	0.0529978	0.040104	Amino acid metabolism; Translation
Q3ZXH7	cbdbA817	GMP synthase [glutamine-hydrolyzing] OS=Dehalococcoides mccartyi (strain CBDB1) GN=guaA PE=3 SV=1	2.06217	2.35858	0.191544	0.0627098	Enzyme families; Nucleotide metabolism; Xenobiotics biodegradation and metabolism
Q3ZXC3	cbdbA719	Phosphoglycerate kinase OS=Dehalococcoides mccartyi (strain CBDB1) GN=pgk PE=3 SV=1	2.26657	2.50644	0.0220289	0.00613682	Carbohydrate metabolism; Energy metabolism; Transport and catabolism
Q3ZY30	cbdbA1055	Archaeal-type glutamate synthase [NADPH] OS=Dehalococcoides mccartyi (strain CBDB1) GN=cbdbA1055 PE=3 SV=1	2.60593	2.60915	0.0306464	0.0571704
Q3ZXC4	cbdbA718	Putative phosphoglycerate mutase,2,3-bisphosphoglycerate-independent OS=Dehalococcoides mccartyi (strain CBDB1) GN=cbdbA718 PE=4 SV=1	2.59298	2.62806	0.0644648	0.00433689	Amino acid metabolism; Carbohydrate metabolism; Energy metabolism
Q3ZW41	cbdbA1643	Aspartyl/glutamyl-tRNA(Asn/Gln) amidotransferase subunit B OS=Dehalococcoides mccartyi (strain CBDB1) GN=gatB PE=3 SV=1	1.98536	2.25858	0.058114	0.0550935	Translation
Q3ZXP5	cbdbA849	Putative hydrogenase subunit OS=Dehalococcoides mccartyi (strain CBDB1) GN=cbdbA849 PE=4 SV=1	2.76052	2.52434	0.0282703	0.0664741
Q3ZX65	cbdbA685	Putative [Fe] hydrogenase, HymC subunit OS=Dehalococcoides mccartyi (strain CBDB1) GN=hymC PE=4 SV=1	3.03332	2.93806	0.0490336	0.0229307
Q3ZX20	cbdbA622	Cell division protein FtsZ OS=Dehalococcoides mccartyi (strain CBDB1) GN=ftsZ PE=3 SV=1	2.59968	2.44358	0.34405	0.135925	Cell growth and death; Cell motility; Replication and repair; Transport and catabolism
Q3ZXZ5	cbdbA988	Phenylacetate-coenzyme A ligase OS=Dehalococcoides mccartyi (strain CBDB1) GN=cbdbA988 PE=3 SV=1	2.58843	2.60549	0.0277141	0.0653372	Amino acid metabolism; Cellular community - prokaryotes
Q3ZW76	cbdbA1708	Homocitrate synthase OS=Dehalococcoides mccartyi (strain CBDB1) GN=cbdbA1708 PE=4 SV=1	2.6945	2.69081	0.0131594	0.0447314	Carbohydrate metabolism
Q3ZXW5	cbdbA971	Conserved domain protein OS=Dehalococcoides mccartyi (strain CBDB1) GN=cbdbA971 PE=4 SV=1	2.87947	3.0619	0.0834905	0.0221043
Q3ZZJ8	cbdbA408	Putative isocitrate dehydrogenase OS=Dehalococcoides mccartyi (strain CBDB1) GN=cbdbA408 PE=3 SV=1	2.75428	2.85533	0.109193	0.0914245	Carbohydrate metabolism
Q3ZYS3	cbdbA1336	Nicotinate-nucleotide pyrophosphorylase OS=Dehalococcoides mccartyi (strain CBDB1) GN=nadC PE=3 SV=1	3.14005	3.06423	0.0419209	0.00322839	Metabolism of cofactors and vitamins
Q3ZZL8	cbdbA445	30S ribosomal protein S3 OS=Dehalococcoides mccartyi (strain CBDB1) GN=rpsC PE=3 SV=1	3.08525	2.96466	0.0745792	0.0595793	Translation
Q3ZY20	cbdbA1012	Isoleucine--tRNA ligase OS=Dehalococcoides mccartyi (strain CBDB1) GN=ileS PE=3 SV=1	2.1512	2.1104	0.177146	0.0890148	Amino acid metabolism; Translation
Q3ZXJ7	cbdbA793	Iron-regulated ABC transporter, atp-binding protein, SufC OS=Dehalococcoides mccartyi (strain CBDB1) GN=sufC PE=4 SV=1	2.05589	2.23392	0.0659696	0.065562	Membrane transport
Q3ZZU9	cbdbA525	RNA polymerase sigma factor SigA OS=Dehalococcoides mccartyi (strain CBDB1) GN=rpoD PE=3 SV=1	2.41449	2.22896	0.11507	0.0181528	Transcription
Q3ZYQ7	cbdbA1302	Type II secretion system protein GspE OS=Dehalococcoides mccartyi (strain CBDB1) GN=gspE PE=4 SV=1	2.236	2.22297	0.0913447	0.0142533	Cell motility; Membrane transport
Q3ZZJ7	cbdbA409	Malate dehydrogenase OS=Dehalococcoides mccartyi (strain CBDB1) GN=mdh PE=3 SV=1	2.62481	2.76646	0.0523266	0.0205792	Amino acid metabolism; Carbohydrate metabolism; Energy metabolism
Q3ZW67	cbdbA1669	Peroxiredoxin OS=Dehalococcoides mccartyi (strain CBDB1) GN=cbdbA1669 PE=3 SV=1	2.57091	2.82407	0.262137	0.0543631	Cell growth and death; Transport and catabolism
Q3ZX68	cbdbA682	Pyruvic-ferredoxin oxidoreductase, beta subunit OS=Dehalococcoides mccartyi (strain CBDB1) GN=porB PE=4 SV=1	3.11483	3.00292	0.0782397	0.0249657	Carbohydrate metabolism; Energy metabolism; Xenobiotics biodegradation and metabolism
Q3ZZB2	cbdbA334	Methionine--tRNA ligase OS=Dehalococcoides mccartyi (strain CBDB1) GN=metG PE=3 SV=1	2.27601	2.19617	0.0100441	0.0322562	Amino acid metabolism; Metabolism of other amino acids; Translation
Q3ZYB2	cbdbA1124	Uncharacterized protein OS=Dehalococcoides mccartyi (strain CBDB1) GN=cbdbA1124 PE=4 SV=1	2.18679	2.48254	0.0531749	0.0214961
Q3ZZM4	cbdbA439	50S ribosomal protein L3 OS=Dehalococcoides mccartyi (strain CBDB1) GN=rplC PE=3 SV=1	2.98458	2.82478	0.0569162	0.0681907	Translation
Q3ZWD3	cbdbA50	Uncharacterized protein OS=Dehalococcoides mccartyi (strain CBDB1) GN=cbdbA50 PE=4 SV=1	1.75858	2.59828	0.0499787	0.00824888
Q3ZXH9	cbdbA815	Dihydroxy-acid dehydratase OS=Dehalococcoides mccartyi (strain CBDB1) GN=ilvD PE=3 SV=1	2.85852	2.63994	0.0478407	0.0287935	Amino acid metabolism; Metabolism of cofactors and vitamins
Q3ZXY0	cbdbA954	50S ribosomal protein L7/L12 OS=Dehalococcoides mccartyi (strain CBDB1) GN=rplL PE=3 SV=1	3.46966	3.37587	0.0889563	0.0417562	Translation
Q3ZWF7	cbdbA82	Sensor histidine kinase OS=Dehalococcoides mccartyi (strain CBDB1) GN=rdhC PE=4 SV=1	2.08124	2.4025	0.0261123	0.020237
Q3ZXT9	cbdbA921	3-oxoacyl-[acyl-carrier-protein] synthase 2 OS=Dehalococcoides mccartyi (strain CBDB1) GN=fabF PE=3 SV=1	2.49296	2.67742	0.084355	0.01999	Lipid metabolism; Metabolism of cofactors and vitamins
Q3ZXH5	cbdbA765	Glycine--tRNA ligase OS=Dehalococcoides mccartyi (strain CBDB1) GN=glyS PE=3 SV=1	2.6916	2.65461	0.00747328	0.0436429	Amino acid metabolism; Translation
Q3ZZW8	cbdbA1731	Aspartokinase OS=Dehalococcoides mccartyi (strain CBDB1) GN=metL PE=3 SV=1	2.91567	2.83158	0.0389826	0.0360355	Amino acid metabolism; Biosynthesis of other secondary metabolites
Q3ZWY0	cbdbA554	Serine--tRNA ligase OS=Dehalococcoides mccartyi (strain CBDB1) GN=serS PE=3 SV=1	2.49211	2.50317	0.12135	0.0192437	Amino acid metabolism; Translation
Q3ZZK1	cbdbA404	Acyl CoA biotin-dependant carboxyltransferase OS=Dehalococcoides mccartyi (strain CBDB1) GN=cbdbA404 PE=4 SV=1	2.03957	2.14446	0.237086	0.0929229	Amino acid metabolism; Carbohydrate metabolism
Q3ZXI5	cbdbA806	3-isopropylmalate dehydratase large subunit OS=Dehalococcoides mccartyi (strain CBDB1) GN=leuC PE=3 SV=1	2.95779	2.83973	0.0168423	0.031295	Amino acid metabolism; Biosynthesis of other secondary metabolites; Carbohydrate metabolism
Q3ZWG4	cbdbA76	Cysteine--tRNA ligase OS=Dehalococcoides mccartyi (strain CBDB1) GN=cysS PE=3 SV=1	2.23625	2.41177	0.171181	0.0373042	Amino acid metabolism; Translation
Q3ZY82	cbdbA1105	Riboflavin biosynthesis protein RibD OS=Dehalococcoides mccartyi (strain CBDB1) GN=ribD PE=3 SV=1	2.3069	2.48362	0.102875	0.0283863	Cellular community - prokaryotes; Metabolism of cofactors and vitamins
Q3ZXQ1	cbdbA897	Putative branched-chain amino acid ABC transporter,periplasmic amino acid-binding protein OS=Dehalococcoides mccartyi (strain CBDB1) GN=cbdbA897 PE=4 SV=1	2.52196	2.73491	0.0786173	0.00906794	Cellular community - prokaryotes; Membrane transport
Q3ZXL7	cbdbA826	Histidinol dehydrogenase OS=Dehalococcoides mccartyi (strain CBDB1) GN=hisD PE=3 SV=1	2.2895	2.42695	0.0673157	0.0192974	Amino acid metabolism
Q3ZYE8	cbdbA1199	Enoyl-[acyl-carrier-protein] reductase [NADH] OS=Dehalococcoides mccartyi (strain CBDB1) GN=fabI PE=3 SV=1	2.47256	2.66691	0.0596482	0.0503343	Biosynthesis of other secondary metabolites; Lipid metabolism; Metabolism of cofactors and vitamins
Q3ZXX6	cbdbA958	Transcription termination/antitermination protein NusG OS=Dehalococcoides mccartyi (strain CBDB1) GN=nusG PE=3 SV=1	2.63372	2.60334	0.0758217	0.0458367	Transcription; Translation
Q3ZYG2	cbdbA1181	Acetylornithine aminotransferase OS=Dehalococcoides mccartyi (strain CBDB1) GN=argD PE=3 SV=1	2.17832	2.22864	0.0396234	0.0734764	Amino acid metabolism
Q3ZWY9	cbdbA569	Glyceraldehyde-3-phosphate dehydrogenase, typeI OS=Dehalococcoides mccartyi (strain CBDB1) GN=gap PE=3 SV=1	3.01159	2.99274	0.0729854	0.0410423	Carbohydrate metabolism; Energy metabolism; Signal transduction; Transport and catabolism
Q3ZYP6	cbdbA1314	Putative mannosyl-3-phosphoglycerate synthase OS=Dehalococcoides mccartyi (strain CBDB1) GN=cbdbA1314 PE=4 SV=1	1.84799	1.97353	0.0775239	0.0505854	Carbohydrate metabolism; Glycan biosynthesis and metabolism
Q3ZZK0	cbdbA405	3-isopropylmalate dehydratase large subunit OS=Dehalococcoides mccartyi (strain CBDB1) GN=leuC PE=3 SV=1	2.60434	2.7558	0.0937117	0.0469919	Amino acid metabolism; Biosynthesis of other secondary metabolites; Carbohydrate metabolism
Q3ZXF0	cbdbA738	K(+)-insensitive pyrophosphate-energized proton pump OS=Dehalococcoides mccartyi (strain CBDB1) GN=hppA PE=3 SV=1	2.69137	2.49636	0.0742692	0.13257	Energy metabolism
Q3ZZU1	cbdbA534	ATP synthase subunit b OS=Dehalococcoides mccartyi (strain CBDB1) GN=atpF PE=3 SV=1	2.71559	2.72876	0.0739435	0.0681899	Energy metabolism
Q3ZXL6	cbdbA828	Probable ATP phosphoribosyltransferase OS=Dehalococcoides mccartyi (strain CBDB1) GN=cbdbA828 PE=4 SV=1	2.07302	2.40131	0.0434833	0.0260393	Amino acid metabolism
Q3ZYM5	cbdbA1284	Glutamyl-tRNA(Gln) amidotransferase subunit A OS=Dehalococcoides mccartyi (strain CBDB1) GN=gatA PE=3 SV=1	1.79196	2.07379	0.181616	0.0369399	Translation
Q3ZYV0	cbdbA1359	Protein GrpE OS=Dehalococcoides mccartyi (strain CBDB1) GN=grpE PE=3 SV=1	3.07689	2.87449	0.0683162	0.0448872	Folding, sorting and degradation; Translation
Q3ZXC7	cbdbA715	Diaminopimelate epimerase OS=Dehalococcoides mccartyi (strain CBDB1) GN=dapF PE=3 SV=1	2.35017	2.66307	0.161298	0.00850871	Amino acid metabolism
Q3ZZM1	cbdbA442	50S ribosomal protein L2 OS=Dehalococcoides mccartyi (strain CBDB1) GN=rplB PE=3 SV=1	3.31803	3.08342	0.0092889	0.0180942	Translation
Q3ZZG4	cbdbA389	Ribose-phosphate pyrophosphokinase OS=Dehalococcoides mccartyi (strain CBDB1) GN=prs PE=3 SV=1	2.65594	2.63006	0.0336772	0.0102993	Carbohydrate metabolism; Nucleotide metabolism
Q3ZXI0	cbdbA813	Acetolactate synthase OS=Dehalococcoides mccartyi (strain CBDB1) GN=ilvB PE=3 SV=1	2.55204	2.70533	0.030482	0.0214827	Amino acid metabolism; Carbohydrate metabolism; Metabolism of cofactors and vitamins
Q3ZYG0	cbdbA1183	Argininosuccinate synthase OS=Dehalococcoides mccartyi (strain CBDB1) GN=argG PE=3 SV=1	2.80043	3.02153	0.0676173	0.0150093	Amino acid metabolism; Transport and catabolism
Q3ZZ67	cbdbA1489	Uncharacterized protein OS=Dehalococcoides mccartyi (strain CBDB1) GN=cbdbA1489 PE=4 SV=1	2.89692	2.77471	0.0759274	0.0377151
Q3ZXS2	cbdbA873	Twitching mobility protein OS=Dehalococcoides mccartyi (strain CBDB1) GN=pilT PE=4 SV=1	2.66256	2.6343	0.0547015	0.0234061	Cell motility; Membrane transport
Q3ZYB4	cbdbA1122	Threonine synthase OS=Dehalococcoides mccartyi (strain CBDB1) GN=thrC PE=3 SV=1	2.25017	2.58499	0.0807412	0.0249757	Amino acid metabolism; Metabolism of cofactors and vitamins
Q3ZZN2	cbdbA430	3-dehydroquinate dehydratase OS=Dehalococcoides mccartyi (strain CBDB1) GN=aroD PE=3 SV=1	2.35622	2.6227	0.0823037	0.0845974	Amino acid metabolism
Q3ZY27	cbdbA1059	Pyridine nucleotide-disulfide oxidoreductase family protein OS=Dehalococcoides mccartyi (strain CBDB1) GN=cbdbA1059 PE=4 SV=1	2.51537	2.58408	0.108823	0.0504473
Q3ZWW9	cbdbA565	Uncharacterized protein OS=Dehalococcoides mccartyi (strain CBDB1) GN=cbdbA565 PE=4 SV=1	3.04951	3.12508	0.0823704	0.0273896
Q3ZZH0	cbdbA383	Phosphopantothenoylcysteine synthetase/decarboxylase OS=Dehalococcoides mccartyi (strain CBDB1) GN=coaBC PE=4 SV=1	2.27517	2.23601	0.0398725	0.042085	Metabolism of cofactors and vitamins
Q3ZWZ2	cbdbA596	Hydrogenase, group 3, VhuG subunit OS=Dehalococcoides mccartyi (strain CBDB1) GN=cbdbA596 PE=4 SV=1	3.35611	3.07934	0.0353009	0.0461452	Metabolism
Q3ZX04	cbdbA581	Soluble hydrogenase, tritium exchange subunit OS=Dehalococcoides mccartyi (strain CBDB1) GN=cbdbA581 PE=3 SV=1	2.8301	2.92618	0.113509	0.106001
Q3ZZI7	cbdbA424	Chorismate mutase/prephenate dehydratase (P-protein) OS=Dehalococcoides mccartyi (strain CBDB1) GN=pheA PE=4 SV=1	2.95585	2.85348	0.0181261	0.00170729	Amino acid metabolism
Q3ZZT8	cbdbA537	ATP synthase gamma chain OS=Dehalococcoides mccartyi (strain CBDB1) GN=atpG PE=3 SV=1	2.59451	2.72316	0.0231	0.0653734	Energy metabolism
Q3ZZJ6	cbdbA410	Uncharacterized protein OS=Dehalococcoides mccartyi (strain CBDB1) GN=cbdbA410 PE=4 SV=1	2.96297	2.8296	0.0803046	0.0783714
Q3ZX30	cbdbA606	Radical SAM domain protein OS=Dehalococcoides mccartyi (strain CBDB1) GN=rdhI PE=4 SV=1	2.48051	2.51755	0.0571116	0.063617
Q3ZWU9	cbdbA266	Uncharacterized protein OS=Dehalococcoides mccartyi (strain CBDB1) GN=cbdbA266 PE=4 SV=1	2.25107	2.36043	0.00815969	0.011455	Poorly characterized
Q3ZYP9	cbdbA1310	Twitching mobility protein OS=Dehalococcoides mccartyi (strain CBDB1) GN=pilT PE=4 SV=1	2.28706	2.40765	0.0344664	0.0443729	Cell motility; Membrane transport
Q3ZXQ4	cbdbA894	Acyl-CoA synthetase (AMP-forming) / AMP-acid ligase OS=Dehalococcoides mccartyi (strain CBDB1) GN=cbdbA894 PE=4 SV=1	2.19027	2.4043	0.0442542	0.017996	Amino acid metabolism; Cellular community - prokaryotes
Q3ZYU1	cbdbA1371	CTP synthase OS=Dehalococcoides mccartyi (strain CBDB1) GN=pyrG PE=3 SV=1	2.38621	2.41902	0.0414949	0.012628	Nucleotide metabolism
Q3ZXE1	cbdbA749	Phosphomethylpyrimidine synthase OS=Dehalococcoides mccartyi (strain CBDB1) GN=thiC PE=3 SV=1	2.20598	2.10202	0.0065823	0.0196794	Metabolism of cofactors and vitamins
Q3ZX46	cbdbA651	Carbon monoxide dehydrogenase/acetyl-CoA synthase large subunit OS=Dehalococcoides mccartyi (strain CBDB1) GN=acsC PE=4 SV=1	2.07044	2.24219	0.0688854	0.00789504	Energy metabolism
Q3ZXS3	cbdbA901	Acyl-CoA synthetase (AMP-forming) / AMP-acid ligase OS=Dehalococcoides mccartyi (strain CBDB1) GN=cbdbA901 PE=4 SV=1	2.13881	2.04252	0.0922901	0.0270254	Cell growth and death; Cellular community - prokaryotes; Lipid metabolism; Transport and catabolism
Q3ZXA5	cbdbA688	Conserved domain protein OS=Dehalococcoides mccartyi (strain CBDB1) GN=cbdbA688 PE=4 SV=1	3.47734	3.05525	0.14708	0.0311633
Q3ZZN4	cbdbA453	50S ribosomal protein L6 OS=Dehalococcoides mccartyi (strain CBDB1) GN=rplF PE=3 SV=1	2.83964	2.8235	0.0157851	0.0930331	Translation
Q3ZXQ8	cbdbA890	Cobyric acid synthase OS=Dehalococcoides mccartyi (strain CBDB1) GN=cobQ PE=3 SV=1	2.06399	2.12478	0.0734831	0.00654484	Metabolism of cofactors and vitamins
Q3ZY69	cbdbA1066	Radical SAM domain protein OS=Dehalococcoides mccartyi (strain CBDB1) GN=rdhI PE=4 SV=1	1.91324	2.2551	0.155033	0.049447
Q3ZXT8	cbdbA902	Indolepyruvate oxidoreductase subunit IorA OS=Dehalococcoides mccartyi (strain CBDB1) GN=iorA PE=4 SV=1	2.27945	2.2878	0.0436669	0.0186272	Metabolism
Q3ZYA4	cbdbA1133	Tyrosine recombinase XerC OS=Dehalococcoides mccartyi (strain CBDB1) GN=xerD PE=3 SV=1	2.20879	2.35115	0.110944	0.086202	Replication and repair
Q3ZWN0	cbdbA170	Putative [Fe] hydrogenase, HymB subunit OS=Dehalococcoides mccartyi (strain CBDB1) GN=hymB PE=4 SV=1	2.66578	2.64324	0.0455038	0.0226119	Energy metabolism
Q3ZYV6	cbdbA1353	Ornithine carbamoyltransferase OS=Dehalococcoides mccartyi (strain CBDB1) GN=argF PE=3 SV=1	2.44811	2.34723	0.028733	0.0624977	Amino acid metabolism
Q3ZX03	cbdbA583	Tyrosine--tRNA ligase OS=Dehalococcoides mccartyi (strain CBDB1) GN=tyrS PE=3 SV=1	1.50126	2.07737	0.0407818	0.0467393	Amino acid metabolism; Translation
Q3ZX39	cbdbA629	Transketolase OS=Dehalococcoides mccartyi (strain CBDB1) GN=tkt PE=3 SV=1	2.51583	2.44072	0.0860891	0.0275756	Carbohydrate metabolism; Energy metabolism; Metabolism of terpenoids and polyketides
Q3ZXV4	cbdbA934	Aspartate-semialdehyde dehydrogenase OS=Dehalococcoides mccartyi (strain CBDB1) GN=asd PE=3 SV=1	2.32479	2.40223	0.108431	0.03325	Amino acid metabolism; Biosynthesis of other secondary metabolites
Q3ZZC4	cbdbA318	Ribosome-recycling factor OS=Dehalococcoides mccartyi (strain CBDB1) GN=frr PE=3 SV=1	3.05048	2.85951	0.0711184	0.0491822	Translation
Q3ZX54	cbdbA641	Nicotinate-nucleotide--dimethylbenzimidazole phosphoribosyltransferase OS=Dehalococcoides mccartyi (strain CBDB1) GN=cobT PE=3 SV=1	Id.	1.70806		0.0194066	Metabolism of cofactors and vitamins
Q3ZZH8	cbdbA372	DegV family protein OS=Dehalococcoides mccartyi (strain CBDB1) GN=degV PE=4 SV=1	2.57965	2.85863	0.209879	0.227964
Q3ZZA3	cbdbA283	Cell division protein ftsA OS=Dehalococcoides mccartyi (strain CBDB1) GN=ftsA PE=3 SV=1	2.47467	2.39674	0.117477	0.0801623	Cell growth and death; Cell motility; Replication and repair
Q3ZYL8	cbdbA1292	Aspartate aminotransferase OS=Dehalococcoides mccartyi (strain CBDB1) GN=aspC PE=3 SV=1	2.31114	2.51446	0.0390506	0.0292107	Amino acid metabolism
Q3ZZP7	cbdbA465	30S ribosomal protein S4 OS=Dehalococcoides mccartyi (strain CBDB1) GN=rpsD PE=3 SV=1	3.32886	3.16818	0.0255201	0.0237025	Translation
Q3ZXS8	cbdbA914	Uncharacterized protein OS=Dehalococcoides mccartyi (strain CBDB1) GN=cbdbA914 PE=4 SV=1	2.8285	3.02761	0.149253	0.0981405
Q3ZZD8	cbdbA364	Uncharacterized protein OS=Dehalococcoides mccartyi (strain CBDB1) GN=cbdbA364 PE=4 SV=1	2.26528	2.38147	0.0377488	0.0671366
Q3ZZ43	cbdbA1463	Peptide ABC transporter, periplasmic peptide-binding protein OS=Dehalococcoides mccartyi (strain CBDB1) GN=cbdbA1463 PE=4 SV=1	2.91424	3.05345	0.123415	0.0429395	Cellular community - prokaryotes; Membrane transport
Q3ZZB8	cbdbA327	Pyridoxal biosynthesis lyase PdxS OS=Dehalococcoides mccartyi (strain CBDB1) GN=pdxS PE=3 SV=1	2.93014	2.95826	0.0599464	0.0313508	Metabolism of cofactors and vitamins
Q3ZZR5	cbdbA508	Diaminopimelate decarboxylase OS=Dehalococcoides mccartyi (strain CBDB1) GN=lysA PE=3 SV=1	2.58558	2.63522	0.0132173	0.0247035	Amino acid metabolism
Q3ZZT3	cbdbA481	Uncharacterized protein OS=Dehalococcoides mccartyi (strain CBDB1) GN=cbdbA481 PE=4 SV=1	1.54593	2.22758	0.18896	0.201744
Q3ZX44	cbdbA654	Carbon monoxide dehydrogenase/acetyl-CoA synthase small subunit OS=Dehalococcoides mccartyi (strain CBDB1) GN=acsD PE=4 SV=1	2.65385	2.54025	0.071026	0.0366424	Energy metabolism
Q3ZWB6	cbdbA7	Histidine--tRNA ligase OS=Dehalococcoides mccartyi (strain CBDB1) GN=hisS PE=3 SV=1	2.40831	2.37212	0.0407113	0.0296654	Amino acid metabolism; Translation
Q3ZW58	cbdbA1683	SAM-dependent methyltransferase UbiE/COQ5 family OS=Dehalococcoides mccartyi (strain CBDB1) GN=cbdbA1683 PE=4 SV=1	1.83203	2.22567	0.500993	0.10047	Metabolism of cofactors and vitamins
Q3ZXP4	cbdbA850	Hydrogenase, group 4, EchE subunit OS=Dehalococcoides mccartyi (strain CBDB1) GN=cbdbA850 PE=4 SV=1	2.73326	2.65443	0.0121871	0.0144382
Q3ZWD5	cbdbA46	Glutamate synthase (NADPH), homotetrameric OS=Dehalococcoides mccartyi (strain CBDB1) GN=gltA PE=4 SV=1	2.06744	2.06287	0.0880389	0.016805	Amino acid metabolism; Energy metabolism
Q3ZXQ2	cbdbA896	Putative branched-chain amino acid ABC transporter,periplasmic amino acid-binding protein OS=Dehalococcoides mccartyi (strain CBDB1) GN=cbdbA896 PE=4 SV=1	2.31508	2.49737	0.138361	0.0295874	Cellular community - prokaryotes; Membrane transport
Q3ZW71	cbdbA1715	ABC transporter, ATP-binding protein OS=Dehalococcoides mccartyi (strain CBDB1) GN=cbdbA1715 PE=4 SV=1	2.34544	2.37637	0.0672658	0.00797419	Membrane transport
Q3ZYF9	cbdbA1185	Argininosuccinate lyase OS=Dehalococcoides mccartyi (strain CBDB1) GN=argH PE=3 SV=1	2.3573	2.41964	0.0945904	0.0184167	Amino acid metabolism; Transport and catabolism
Q3ZZI6	cbdbA425	Chorismate synthase OS=Dehalococcoides mccartyi (strain CBDB1) GN=aroC PE=3 SV=1	3.08994	3.02571	0.13589	0.0423366	Amino acid metabolism
Q3ZWI3	cbdbA104	Putative type I restriction-modification system methylation subunit OS=Dehalococcoides mccartyi (strain CBDB1) GN=cbdbA104 PE=4 SV=1	1.67456	1.77709	0.0504507	0.014235	Transport and catabolism
Q3ZXL3	cbdbA831	SPFH domain protein OS=Dehalococcoides mccartyi (strain CBDB1) GN=cbdbA831 PE=4 SV=1	3.13794	2.81971	0.0593023	0.0730904
Q3ZXN1	cbdbA864	Uncharacterized protein OS=Dehalococcoides mccartyi (strain CBDB1) GN=cbdbA864 PE=4 SV=1	1.46263	2.40586	0.108721	0.0396969
Q3ZXL8	cbdbA825	Histidinol-phosphate aminotransferase OS=Dehalococcoides mccartyi (strain CBDB1) GN=hisC PE=3 SV=1	2.1827	2.34284	0.0350006	0.175129	Amino acid metabolism; Biosynthesis of other secondary metabolites
Q3ZZQ3	cbdbA459	Adenylate kinase OS=Dehalococcoides mccartyi (strain CBDB1) GN=adk PE=3 SV=1	2.20048	2.20147	0.0290156	0.0283079	Metabolism of cofactors and vitamins; Nucleotide metabolism; Transport and catabolism
Q3ZYM1	cbdbA1289	ABC transporter, ATP-binding protein OS=Dehalococcoides mccartyi (strain CBDB1) GN=cbdbA1289 PE=3 SV=1	2.06098	2.40816	0.0691209	0.0232763	Membrane transport
Q3ZY28	cbdbA1058	Glutamine amidotransferase, class II OS=Dehalococcoides mccartyi (strain CBDB1) GN=cbdbA1058 PE=4 SV=1	2.40749	2.5555	0.00612288	0.00271266
Q3ZXK4	cbdbA841	Elongation factor 4 OS=Dehalococcoides mccartyi (strain CBDB1) GN=lepA PE=3 SV=1	1.8202	1.98581	0.218433	0.0202771
Q3ZYQ8	cbdbA1301	DNA-binding response regulator, LuxR family OS=Dehalococcoides mccartyi (strain CBDB1) GN=cbdbA1301 PE=4 SV=1	2.51635	2.57634	0.0486555	0.0250545
Q3ZZV0	cbdbA524	Putative exonuclease SbcC OS=Dehalococcoides mccartyi (strain CBDB1) GN=cbdbA524 PE=4 SV=1	1.70389	1.68575	0.0926701	0.028777	Replication and repair
Q3ZZA7	cbdbA278	50S ribosomal protein L19 OS=Dehalococcoides mccartyi (strain CBDB1) GN=rplS PE=3 SV=1	3.33479	3.04355	0.0613866	0.0187433	Translation
Q3ZWK6	cbdbA141	Acetyl-CoA carboxylase, biotin carboxylase OS=Dehalococcoides mccartyi (strain CBDB1) GN=accC PE=4 SV=1	2.22358	2.32436	0.0305481	0.0422377	Carbohydrate metabolism; Energy metabolism
Q3ZYW4	cbdbA1399	[NiFe] hydrogenase maturation protein HypF OS=Dehalococcoides mccartyi (strain CBDB1) GN=hypF PE=4 SV=1	1.26025	1.52476	0.0283436	0.0633055	Genetic information processing
Q3ZWH6	cbdbA113	Uncharacterized protein OS=Dehalococcoides mccartyi (strain CBDB1) GN=cbdbA113 PE=4 SV=1	3.1523	2.97969	0.0410271	0.0163346
Q3ZYB3	cbdbA1123	Homoserine dehydrogenase OS=Dehalococcoides mccartyi (strain CBDB1) GN=metM PE=3 SV=1	2.15156	2.39679	0.0446153	0.0117356	Amino acid metabolism
Q3ZXV3	cbdbA935	4-hydroxy-tetrahydrodipicolinate synthase OS=Dehalococcoides mccartyi (strain CBDB1) GN=dapA PE=3 SV=1	2.26719	2.60285	0.097688	0.0307506	Amino acid metabolism; Biosynthesis of other secondary metabolites
Q3ZZ17	cbdbA1441	Anthranilate synthase component I OS=Dehalococcoides mccartyi (strain CBDB1) GN=trpE PE=4 SV=1	1.99835	2.10002	0.0622234	0.0828867	Amino acid metabolism; Biosynthesis of other secondary metabolites; Cellular community - prokaryotes
Q3ZYS8	cbdbA1331	Uncharacterized protein OS=Dehalococcoides mccartyi (strain CBDB1) GN=cbdbA1331 PE=4 SV=1	2.74021	2.83368	0.0427294	0.0420899
Q3ZZU5	cbdbA530	Uncharacterized protein OS=Dehalococcoides mccartyi (strain CBDB1) GN=cbdbA530 PE=4 SV=1	2.57742	2.69595	0.0672566	0.0339269	Poorly characterized
Q3ZXQ6	cbdbA892	Branched-chain amino acid ABC transporter,ATP-binding protein OS=Dehalococcoides mccartyi (strain CBDB1) GN=cbdbA892 PE=4 SV=1	1.74393	2.0688	0.219037	0.0475181	Cellular community - prokaryotes; Membrane transport
Q3ZYQ0	cbdbA1309	Putative type IV pilus assembly family protein OS=Dehalococcoides mccartyi (strain CBDB1) GN=cbdbA1309 PE=4 SV=1	2.77313	2.62936	0.0568101	0.0289265	Cell motility; Membrane transport
Q3ZXH1	cbdbA769	Adenine deaminase OS=Dehalococcoides mccartyi (strain CBDB1) GN=ade PE=3 SV=1	1.99308	2.00778	0.060806	0.0439624	Nucleotide metabolism
Q3ZX43	cbdbA656	Bifunctional protein FolD OS=Dehalococcoides mccartyi (strain CBDB1) GN=folD PE=3 SV=1	2.07954	2.563	0.138488	0.0378398	Energy metabolism; Metabolism of cofactors and vitamins
Q3ZZR8	cbdbA503	Glutamine--fructose-6-phosphate aminotransferase [isomerizing] OS=Dehalococcoides mccartyi (strain CBDB1) GN=glmS PE=3 SV=1	1.59226	1.74125	0.205088	0.0372765	Amino acid metabolism; Carbohydrate metabolism; Enzyme families
Q3ZYL7	cbdbA1293	Tryptophan--tRNA ligase OS=Dehalococcoides mccartyi (strain CBDB1) GN=trpS PE=3 SV=1	2.28063	2.52918	0.178031	0.0405404	Amino acid metabolism; Translation
Q3ZWI6	cbdbA102	Uncharacterized protein OS=Dehalococcoides mccartyi (strain CBDB1) GN=cbdbA102 PE=4 SV=1	1.75804	1.72355	0.0703438	0.102903
Q3ZZI5	cbdbA427	3-phosphoshikimate 1-carboxyvinyltransferase OS=Dehalococcoides mccartyi (strain CBDB1) GN=aroA PE=3 SV=1	2.54677	2.46579	0.199097	0.0517568	Amino acid metabolism
Q3ZX71	cbdbB16	Pyruvic-ferredoxin oxidoreductase, gammasubunit OS=Dehalococcoides mccartyi (strain CBDB1) GN=porG PE=4 SV=1	2.82264	2.77683	0.104007	0.112827	Carbohydrate metabolism; Energy metabolism; Xenobiotics biodegradation and metabolism
Q3ZYB9	cbdbA1114	Dihydroorotase OS=Dehalococcoides mccartyi (strain CBDB1) GN=pyrC PE=3 SV=1	1.79246	2.16906	0.167103	0.0553304	Nucleotide metabolism
Q3ZY17	cbdbA1016	Uncharacterized protein OS=Dehalococcoides mccartyi (strain CBDB1) GN=cbdbA1016 PE=4 SV=1	2.30063	2.4606	0.145756	0.0401781
Q3ZZE4	cbdbA358	Rubrerythrin OS=Dehalococcoides mccartyi (strain CBDB1) GN=cbdbA358 PE=4 SV=1	2.72607	2.76227	0.116666	0.0594432
Q3ZZV8	cbdbA515	50S ribosomal protein L9 OS=Dehalococcoides mccartyi (strain CBDB1) GN=rplI PE=3 SV=1	2.79798	2.53814	0.00623074	0.0278509	Translation
Q3ZXX8	cbdbA956	50S ribosomal protein L1 OS=Dehalococcoides mccartyi (strain CBDB1) GN=rplA PE=3 SV=1	2.90338	3.04758	0.107617	0.0687839	Translation
Q3ZXG8	cbdbA773	ABC transporter, ATP-binding protein OS=Dehalococcoides mccartyi (strain CBDB1) GN=cbdbA773 PE=3 SV=1	2.29802	2.31083	0.13696	0.0179635	Membrane transport
Q3ZYA9	cbdbA1127	Peptide chain release factor 1 OS=Dehalococcoides mccartyi (strain CBDB1) GN=prfA PE=3 SV=1	2.19678	2.23567	0.0654352	0.187063	Translation
Q3ZYL0	cbdbA1245	Uncharacterized protein OS=Dehalococcoides mccartyi (strain CBDB1) GN=cbdbA1245 PE=4 SV=1	3.37498	3.11492	0.0371932	0.0520569
Q3ZY08	cbdbA1025	Putative cell division protein OS=Dehalococcoides mccartyi (strain CBDB1) GN=cbdbA1025 PE=4 SV=1	2.1786	2.16886	0.0624764	0.0373026
Q3ZXW3	cbdbA951	Acetyltransferase, GNAT family OS=Dehalococcoides mccartyi (strain CBDB1) GN=cbdbA951 PE=4 SV=1	2.24115	2.39242	0.123917	0.051775
Q3ZZS3	cbdbA494	PmbA OS=Dehalococcoides mccartyi (strain CBDB1) GN=cbdbA494 PE=4 SV=1	2.01869	2.17551	0.0717838	0.028469	Enzyme families
Q3ZW57	cbdbA1684	AIR synthase domain protein OS=Dehalococcoides mccartyi (strain CBDB1) GN=cbdbA1684 PE=4 SV=1	2.75108	2.59487	0.0651173	0.0674432
Q3ZYY2	cbdbA1436	DNA polymerase III, alpha subunit OS=Dehalococcoides mccartyi (strain CBDB1) GN=dnaE PE=4 SV=1	1.73308	1.79229	0.213275	0.0216537	Nucleotide metabolism; Replication and repair
Q3ZYI7	cbdbA1210	Radical SAM domain protein OS=Dehalococcoides mccartyi (strain CBDB1) GN=cbdbA1210 PE=4 SV=1	2.13154	2.04294	0.300963	0.102781
Q3ZZ02	cbdbA1459	Peptide ABC transporter, ATP-binding protein OS=Dehalococcoides mccartyi (strain CBDB1) GN=cbdbA1459 PE=4 SV=1	1.65032	2.0834	0.135101	0.00604641
Q3ZZN9	cbdbA474	Phosphoglucomutase OS=Dehalococcoides mccartyi (strain CBDB1) GN=cbdbA474 PE=3 SV=1	2.06669	2.00678	0.0124693	0.0574373
Q3ZXP6	cbdbA848	Hydrogenase subunit HymC OS=Dehalococcoides mccartyi (strain CBDB1) GN=cbdbA848 PE=4 SV=1	2.70724	2.55012	0.0318649	0.0307846
Q3ZYJ1	cbdbA1204	Malonyl CoA-acyl carrier protein transacylase OS=Dehalococcoides mccartyi (strain CBDB1) GN=fabD PE=3 SV=1	2.27339	2.48075	0.0849777	0.00871422	Biosynthesis of other secondary metabolites; Lipid metabolism
Q3ZYA2	cbdbA1135	Acetyltransferase, GNAT family OS=Dehalococcoides mccartyi (strain CBDB1) GN=cbdbA1135 PE=4 SV=1	2.33815	2.34344	0.0290431	0.0637201	Metabolism
Q3ZZR1	cbdbA512	ATP-binding protein, DnaC family OS=Dehalococcoides mccartyi (strain CBDB1) GN=cbdbA512 PE=4 SV=1	1.89595	1.94882	0.0836392	0.143006	Replication and repair
Q3ZWP1	cbdbA185	Sensor histidine kinase OS=Dehalococcoides mccartyi (strain CBDB1) GN=rdhC PE=4 SV=1	1.49749	1.9676	0.224371	0.0568589
Q3ZYZ2	cbdbA1419	50S ribosomal protein L25 OS=Dehalococcoides mccartyi (strain CBDB1) GN=rplY PE=3 SV=1	2.44002	2.47916	0.0766796	0.0460021	Translation
Q3ZXG9	cbdbA772	ABC transporter associated protein with signal peptide, putative periplasmic substrate binding subunit OS=Dehalococcoides mccartyi (strain CBDB1) GN=cbdbA772 PE=4 SV=1	2.53444	2.44646	0.0618232	0.042801
Q3ZY19	cbdbA1014	Putative SpoIIIJ-associated protein Jag OS=Dehalococcoides mccartyi (strain CBDB1) GN=cbdbA1014 PE=4 SV=1	2.34405	2.51047	0.17821	0.0152067	Cellular processes and signaling
Q3ZW84	cbdbA1700	Protein RecA OS=Dehalococcoides mccartyi (strain CBDB1) GN=recA PE=3 SV=1	2.274	2.36511	0.142246	0.0784723	Replication and repair
Q3ZXX9	cbdbA955	50S ribosomal protein L10 OS=Dehalococcoides mccartyi (strain CBDB1) GN=rplJ PE=3 SV=1	2.31471	2.58708	0.0589638	0.246739	Translation
Q3ZZM3	cbdbA440	50S ribosomal protein L4 OS=Dehalococcoides mccartyi (strain CBDB1) GN=rplD PE=3 SV=1	3.04163	3.06914	0.124004	0.0704871	Translation
Q3ZYH9	cbdbA1224	Gamma-glutamyl phosphate reductase OS=Dehalococcoides mccartyi (strain CBDB1) GN=proA PE=3 SV=1	2.05249	2.12546	0.0323526	0.0174546	Amino acid metabolism; Biosynthesis of other secondary metabolites
Q3ZYP4	cbdbA1316	Glutamate--tRNA ligase OS=Dehalococcoides mccartyi (strain CBDB1) GN=gltX PE=3 SV=1	1.50727	2.17787	0.136772	0.0596613	Amino acid metabolism; Metabolism of cofactors and vitamins; Translation; Transport and catabolism
Q3ZW63	cbdbA1675	LemA family protein OS=Dehalococcoides mccartyi (strain CBDB1) GN=cbdbA1675 PE=4 SV=1	3.03066	2.6399	0.149518	0.0511055	Poorly characterized
Q3ZXE6	cbdbA743	Transcription elongation factor GreA OS=Dehalococcoides mccartyi (strain CBDB1) GN=greA PE=3 SV=1	2.22572	2.16118	0.163391	0.0536083	Transcription
Q3ZZQ7	cbdbA455	30S ribosomal protein S5 OS=Dehalococcoides mccartyi (strain CBDB1) GN=rpsE PE=3 SV=1	2.81542	2.94669	0.0460718	0.0384236	Translation
Q3ZXJ2	cbdbA799	Conserved domain protein OS=Dehalococcoides mccartyi (strain CBDB1) GN=cbdbA799 PE=4 SV=1	1.90102	2.09745	0.0511522	0.0517294
Q3ZZP3	cbdbA469	50S ribosomal protein L13 OS=Dehalococcoides mccartyi (strain CBDB1) GN=rplM PE=3 SV=1	2.99391	2.98746	0.0837021	0.0233406	Translation
Q3ZZ42	cbdbA1465	Uncharacterized protein OS=Dehalococcoides mccartyi (strain CBDB1) GN=cbdbA1465 PE=4 SV=1	2.66034	2.63506	0.029245	0.0869282
Q3ZYT2	cbdbA1326	Putative dnaK suppressor protein OS=Dehalococcoides mccartyi (strain CBDB1) GN=cbdbA1326 PE=4 SV=1	2.49348	2.21012	0.0177742	0.111856
Q3ZX50	cbdbA645	Thioredoxin OS=Dehalococcoides mccartyi (strain CBDB1) GN=trx PE=3 SV=1	3.26632	3.13187	0.0251008	0.0354324	Folding, sorting and degradation;
Q3ZYB8	cbdbA1117	Carbamoyl-phosphate synthase small chain OS=Dehalococcoides mccartyi (strain CBDB1) GN=carA PE=3 SV=1	2.05278	2.10137	0.057051	0.0844698	Amino acid metabolism; Nucleotide metabolism
Q3ZYV2	cbdbA1357	Chaperone protein DnaJ OS=Dehalococcoides mccartyi (strain CBDB1) GN=dnaJ PE=3 SV=1	2.06767	2.05485	0.117963	0.0651456	Folding, sorting and degradation; Translation
Q3ZZJ5	cbdbA411	Putative fumarate hydratase, alpha subunit OS=Dehalococcoides mccartyi (strain CBDB1) GN=cbdbA411 PE=4 SV=1	1.93796	2.13183	0.136139	0.0522712	Carbohydrate metabolism; Energy metabolism
Q3ZWT4	cbdbA227	Uncharacterized protein OS=Dehalococcoides mccartyi (strain CBDB1) GN=cbdbA227 PE=4 SV=1	2.49396	2.61029	0.185863	0.0973153
Q3ZZ08	cbdbA1453	Putative reductive dehalogenase OS=Dehalococcoides mccartyi (strain CBDB1) GN=rdhA PE=4 SV=1	1.7674	1.6767	0.359477	0.0653698
Q3ZZV6	cbdbA517	Phosphate acyltransferase OS=Dehalococcoides mccartyi (strain CBDB1) GN=plsX PE=3 SV=1	2.27277	2.2819	0.0119459	0.0191121	Lipid metabolism
Q3ZWX1	cbdbA563	Putative DNA polymerase III, gamma and tau subunits OS=Dehalococcoides mccartyi (strain CBDB1) GN=dnaX PE=4 SV=1	2.15095	2.03999	0.0742406	0.0130106	Nucleotide metabolism; Replication and repair
Q3ZZC9	cbdbA311	4-hydroxy-3-methylbut-2-en-1-yl diphosphate synthase OS=Dehalococcoides mccartyi (strain CBDB1) GN=ispG PE=3 SV=1	1.75684	1.93427	0.13477	0.0355148	Metabolism of terpenoids and polyketides
Q3ZXC8	cbdbA714	LL-diaminopimelate aminotransferase OS=Dehalococcoides mccartyi (strain CBDB1) GN=dapL PE=3 SV=1	2.37836	2.53523	0.0333106	0.0219416	Amino acid metabolism
Q3ZZL2	cbdbA451	50S ribosomal protein L5 OS=Dehalococcoides mccartyi (strain CBDB1) GN=rplE PE=3 SV=1	2.55733	2.55701	0.232153	0.29754	Translation
Q3ZY07	cbdbA1026	DNA repair protein RecN OS=Dehalococcoides mccartyi (strain CBDB1) GN=recN PE=3 SV=1	1.67345	1.64396	0.0802336	0.105167	Replication and repair
Q3ZYF6	cbdbA1190	DegV family protein OS=Dehalococcoides mccartyi (strain CBDB1) GN=cbdbA1190 PE=4 SV=1	2.34869	2.30155	0.0362968	0.0071697
Q3ZX28	cbdbA608	Ribonucleotide reductase OS=Dehalococcoides mccartyi (strain CBDB1) GN=nrd PE=4 SV=1	2.31421	2.27017	0.080174	0.0588005	Nucleotide metabolism; Replication and repair
Q3ZWC1	cbdbA68	Queuine tRNA-ribosyltransferase OS=Dehalococcoides mccartyi (strain CBDB1) GN=tgt PE=3 SV=1	1.74389	1.92102	0.0867881	0.101362	Translation
Q3ZZV7	cbdbA516	Thioredoxin reductase OS=Dehalococcoides mccartyi (strain CBDB1) GN=trxB PE=3 SV=1	2.42044	2.37712	0.0768215	0.029774	Metabolism of other amino acids
Q3ZZW6	cbdbA1734	Bisphosphoglycerate-independent phosphoglycerate mutase OS=Dehalococcoides mccartyi (strain CBDB1) GN=cbdbA1734 PE=4 SV=1	2.09592	2.21125	0.285071	0.0187877	Amino acid metabolism; Carbohydrate metabolism; Energy metabolism
Q3ZWK0	cbdbA148	Sensor histidine kinase OS=Dehalococcoides mccartyi (strain CBDB1) GN=cbdbA148 PE=4 SV=1	1.82904	1.70262	0.21388	0.143415
Q3ZYD0	cbdbA1159	Peptidyl-prolyl cis-trans isomerase OS=Dehalococcoides mccartyi (strain CBDB1) GN=ppiB PE=3 SV=1	3.05882	3.00416	0.0174494	0.0444549
Q3ZZ11	cbdbA1450	Tryptophan synthase beta chain OS=Dehalococcoides mccartyi (strain CBDB1) GN=trpB PE=3 SV=1	2.4103	2.48777	0.0413258	0.0151315	Amino acid metabolism
Q3ZXC5	cbdbA717	Triosephosphate isomerase OS=Dehalococcoides mccartyi (strain CBDB1) GN=tpiA PE=3 SV=1	2.30217	2.48399	0.0675131	0.014787	Carbohydrate metabolism; Energy metabolism; Transport and catabolism
Q3ZZT2	cbdbA482	S-methyl-5'-thioadenosine phosphorylase OS=Dehalococcoides mccartyi (strain CBDB1) GN=mtaP PE=3 SV=1	1.90446	2.32736	0.37689	0.025254	Amino acid metabolism
Q3ZZ75	cbdbA1522	Putative CRISPR-associated helicase Cas3 OS=Dehalococcoides mccartyi (strain CBDB1) GN=cas3 PE=4 SV=1	1.51062	1.50751	0.0509942	0.0470901	Transport and catabolism
Q3ZY24	cbdbA1006	Acyl-CoA synthetase (AMP-forming) / AMP-acid ligase OS=Dehalococcoides mccartyi (strain CBDB1) GN=cbdbA1006 PE=4 SV=1	1.81291	1.92821	0.0229569	0.0709973	Cell growth and death; Cellular community - prokaryotes; Lipid metabolism; Transport and catabolism
Q3ZWG8	cbdbA124	DegV family protein OS=Dehalococcoides mccartyi (strain CBDB1) GN=cbdbA124 PE=4 SV=1	2.29768	2.49778	0.185351	0.17841
Q3ZZU0	cbdbA535	ATP synthase subunit delta OS=Dehalococcoides mccartyi (strain CBDB1) GN=atpH PE=3 SV=1	2.20692	2.6652	0.0509811	0.0869581	Energy metabolism
Q3ZYS2	cbdbA1338	L-aspartate oxidase OS=Dehalococcoides mccartyi (strain CBDB1) GN=nabD PE=4 SV=1	1.74833	1.89829	0.0665596	0.00673942	Amino acid metabolism; Metabolism of cofactors and vitamins
Q3ZXN4	cbdbA861	Aminopeptidase protein OS=Dehalococcoides mccartyi (strain CBDB1) GN=cbdbA861 PE=4 SV=1	2.49728	2.62661	0.126345	0.0261844	Enzyme families
Q3ZYG4	cbdbA1179	Arginine biosynthesis bifunctional protein ArgJ OS=Dehalococcoides mccartyi (strain CBDB1) GN=argJ PE=3 SV=1	2.2338	2.29652	0.0512505	0.032777	Amino acid metabolism
Q3ZZM7	cbdbA435	30S ribosomal protein S7 OS=Dehalococcoides mccartyi (strain CBDB1) GN=rpsG PE=3 SV=1	3.14744	3.00369	0.0634563	0.0535662	Translation
Q3ZWW7	cbdbA567	Uncharacterized protein OS=Dehalococcoides mccartyi (strain CBDB1) GN=cbdbA567 PE=4 SV=1	2.89332	2.87644	0.0739708	0.030495
Q3ZZX0	cbdbA1729	TPR domain protein OS=Dehalococcoides mccartyi (strain CBDB1) GN=cbdbA1729 PE=4 SV=1	2.59526	2.49208	0.0295841	0.0232324
Q3ZYF5	cbdbA1191	DegV family protein OS=Dehalococcoides mccartyi (strain CBDB1) GN=cbdbA1191 PE=4 SV=1	2.27662	2.37445	0.0597178	0.115906
Q3ZWE0	cbdbA40	Uncharacterized protein OS=Dehalococcoides mccartyi (strain CBDB1) GN=cbdbA40 PE=4 SV=1	1.39482	1.85828	0.124573	0.0149484	Poorly characterized
Q3ZZD5	cbdbA335	Heptaprenyl diphosphate synthase component II OS=Dehalococcoides mccartyi (strain CBDB1) GN=hepT PE=3 SV=1	1.59363	1.92809	0.294875	0.0502949
Q3ZZF0	cbdbA351	3-dehydroquinate synthase OS=Dehalococcoides mccartyi (strain CBDB1) GN=aroB PE=3 SV=1	2.13401	2.2761	0.177985	0.0348098	Amino acid metabolism
Q3ZY14	cbdbA1018	30S ribosomal protein S18 OS=Dehalococcoides mccartyi (strain CBDB1) GN=rpsR PE=3 SV=1	3.46448	3.14626	0.0555048	0.0799836	Translation
Q3ZZJ9	cbdbA407	3-isopropylmalate dehydratase small subunit OS=Dehalococcoides mccartyi (strain CBDB1) GN=leuD PE=3 SV=1	2.8738	2.85075	0.0531407	0.0337079	Amino acid metabolism; Carbohydrate metabolism
Q3ZZ76	cbdbA1521	Uncharacterized protein OS=Dehalococcoides mccartyi (strain CBDB1) GN=cbdbA1521 PE=4 SV=1	1.97473	1.85508	0.0508546	0.0567482	Transport and catabolism
Q3ZYH2	cbdbA1234	DNA-binding response regulator OS=Dehalococcoides mccartyi (strain CBDB1) GN=cbdbA1234 PE=4 SV=1	1.89197	2.48593	0.131107	0.0427394
Q3ZZF2	cbdbA349	Putative ubiquinone/menaquinone biosynthesis methlytransferase UbiE OS=Dehalococcoides mccartyi (strain CBDB1) GN=cbdbA349 PE=4 SV=1	2.60435	2.45841	0.106296	0.0425494	Metabolism of cofactors and vitamins
Q3ZWB0	cbdbA14	Orotidine 5'-phosphate decarboxylase OS=Dehalococcoides mccartyi (strain CBDB1) GN=pyrF PE=3 SV=1	2.27086	2.29266	0.0598407	0.0558601	Nucleotide metabolism
Q3ZY71	cbdbA1063	Cysteine synthase OS=Dehalococcoides mccartyi (strain CBDB1) GN=cysK PE=3 SV=1	1.57564	2.20248	0.209368	0.0631813	Amino acid metabolism; Energy metabolism
Q3ZZL4	cbdbA449	50S ribosomal protein L14 OS=Dehalococcoides mccartyi (strain CBDB1) GN=rplN PE=3 SV=1	2.82402	2.59709	0.106428	0.0571214	Translation
Q3ZZV4	cbdbA520	Amidohydrolase family protein OS=Dehalococcoides mccartyi (strain CBDB1) GN=cbdbA520 PE=4 SV=1	1.08492	1.84261	0.211056	0.0410377
Q3ZVZ8	cbdbA1635	Uncharacterized protein OS=Dehalococcoides mccartyi (strain CBDB1) GN=cbdbA1635 PE=4 SV=1	3.36365	3.16815	0.0854939	0.0313053
Q3ZY76	cbdbA1111	ATP-dependent DNA helicase PcrA OS=Dehalococcoides mccartyi (strain CBDB1) GN=pcrA PE=4 SV=1	1.85634	1.59307	0.0252941	0.0699484	Replication and repair
Q3ZWX3	cbdbA561	Recombination protein RecR OS=Dehalococcoides mccartyi (strain CBDB1) GN=recR PE=3 SV=1	2.02046	1.97556	0.12541	0.0910823	Replication and repair
Q3ZYY1	cbdbA1378	Phosphoribosylformylglycinamidine cyclo-ligase OS=Dehalococcoides mccartyi (strain CBDB1) GN=purM PE=3 SV=1	1.98291	2.10307	0.149291	0.0534597	Nucleotide metabolism
Q3ZYG3	cbdbA1180	Acetylglutamate kinase OS=Dehalococcoides mccartyi (strain CBDB1) GN=argB PE=3 SV=1	2.4608	2.39163	0.0906868	0.0343659	Amino acid metabolism
Q3ZZG8	cbdbA385	Sensor histidine kinase OS=Dehalococcoides mccartyi (strain CBDB1) GN=cbdbA385 PE=4 SV=1	2.28809	2.07838	0.073223	0.00545269
Q3ZYA0	cbdbA1137	DNA mismatch repair protein MutS OS=Dehalococcoides mccartyi (strain CBDB1) GN=mutS PE=3 SV=1	1.68726	1.82546	0.0701942	0.0457124	Replication and repair
Q3ZXX7	cbdbA957	50S ribosomal protein L11 OS=Dehalococcoides mccartyi (strain CBDB1) GN=rplK PE=3 SV=1	2.95124	2.90429	0.0255465	0.0101125	Translation
Q3ZY85	cbdbA1102	6,7-dimethyl-8-ribityllumazine synthase OS=Dehalococcoides mccartyi (strain CBDB1) GN=ribH PE=3 SV=1	2.94814	2.92846	0.0432386	0.0639413	Metabolism of cofactors and vitamins
Q3ZZQ8	cbdbA454	50S ribosomal protein L18 OS=Dehalococcoides mccartyi (strain CBDB1) GN=rplR PE=3 SV=1	2.3486	2.59858	0.239863	0.0459295	Translation
Q3ZYL9	cbdbA1291	Transcriptional regulator, AsnC family OS=Dehalococcoides mccartyi (strain CBDB1) GN=cbdbA1291 PE=4 SV=1	2.65371	2.79943	0.0306575	0.0245173
Q3ZYX5	cbdbA1385	tRNA(Ile)-lysidine synthase OS=Dehalococcoides mccartyi (strain CBDB1) GN=tilS PE=3 SV=1	1.55436	1.89241	0.333989	0.0917342	Translation
Q3ZZT4	cbdbA514	Replicative DNA helicase OS=Dehalococcoides mccartyi (strain CBDB1) GN=dnaB PE=4 SV=1	2.34758	2.08584	0.0466954	0.10782	Cell growth and death; Replication and repair
Q3ZZW9	cbdbA1730	NifU protein, homolog OS=Dehalococcoides mccartyi (strain CBDB1) GN=cbdbA1730 PE=4 SV=1	3.21405	3.0704	0.0884099	0.0508906
Q3ZWX9	cbdbA555	Lysine--tRNA ligase OS=Dehalococcoides mccartyi (strain CBDB1) GN=lysS PE=3 SV=1	2.09531	2.11092	0.101516	0.0283036	Amino acid metabolism; Translation
Q3ZY18	cbdbA1015	Putative inner membrane protein, 60 kDa OS=Dehalococcoides mccartyi (strain CBDB1) GN=cbdbA1015 PE=3 SV=1	2.6006	2.37632	0.0415939	0.0601335	Cellular community - prokaryotes; Folding, sorting and degradation; Membrane transport; Translation
Q3ZY73	cbdbA1061	Iron-sulfur cluster-binding protein OS=Dehalococcoides mccartyi (strain CBDB1) GN=cbdbA1061 PE=4 SV=1	2.30719	2.29242	0.107507	0.0319099	Energy metabolism; Xenobiotics biodegradation and metabolism
Q3ZYJ9	cbdbA1256	UPF0234 protein cbdbA1256 OS=Dehalococcoides mccartyi (strain CBDB1) GN=cbdbA1256 PE=3 SV=1	2.4723	2.54736	0.139486	0.0381352	Cellular processes and signaling
Q3ZXI6	cbdbA805	3-isopropylmalate dehydratase small subunit OS=Dehalococcoides mccartyi (strain CBDB1) GN=leuD PE=3 SV=1	3.01327	2.937	0.0890363	0.0020687	Amino acid metabolism; Carbohydrate metabolism
Q3ZXX2	cbdbA962	Uncharacterized protein OS=Dehalococcoides mccartyi (strain CBDB1) GN=cbdbA962 PE=4 SV=1	2.02178	2.31311	0.146599	0.0329921
Q3ZYN1	cbdbA1276	Phosphoribosyl-AMP cyclohydrolase OS=Dehalococcoides mccartyi (strain CBDB1) GN=hisI PE=4 SV=1	2.10082	2.34186	0.0779596	0.0555288	Amino acid metabolism
Q3ZW59	cbdbA1681	Quinolinate synthase A OS=Dehalococcoides mccartyi (strain CBDB1) GN=nadA PE=3 SV=1	1.86056	1.87735	0.0608028	0.0595258	Metabolism of cofactors and vitamins
Q3ZYW2	cbdbA1401	Hydrogenase expression/formation protein HypD OS=Dehalococcoides mccartyi (strain CBDB1) GN=hypD PE=4 SV=1	1.74104	2.06574	0.0247966	0.0644063	Genetic information processing
Q3ZZD3	cbdbA307	Phenylalanine--tRNA ligase alpha subunit OS=Dehalococcoides mccartyi (strain CBDB1) GN=pheS PE=3 SV=1	2.72088	2.5942	0.0680556	0.0166485	Amino acid metabolism; Translation
Q3ZZN5	cbdbA478	Uncharacterized protein OS=Dehalococcoides mccartyi (strain CBDB1) GN=cbdbA478 PE=4 SV=1	1.88669	1.88829	0.115824	0.276925	Poorly characterized
Q3ZXP8	cbdbA872	Uncharacterized protein OS=Dehalococcoides mccartyi (strain CBDB1) GN=cbdbA872 PE=4 SV=1	2.50017	2.45305	0.0205349	0.0385871
Q3ZX41	cbdbA659	Iron-sulfur cluster binding protein OS=Dehalococcoides mccartyi (strain CBDB1) GN=cbdbA659 PE=4 SV=1	1.84994	1.94027	0.0559716	0.053449
Q3ZZX5	cbdbA1722	N-acetyl-gamma-glutamyl-phosphate reductase OS=Dehalococcoides mccartyi (strain CBDB1) GN=argC PE=3 SV=1	2.23244	2.36558	0.0318108	0.0327256	Amino acid metabolism
Q3ZY79	cbdbA1108	Orotate phosphoribosyltransferase OS=Dehalococcoides mccartyi (strain CBDB1) GN=pyrE PE=3 SV=1	2.42477	2.52585	0.146767	0.0326888	Nucleotide metabolism
Q3ZZ94	cbdbA294	Uncharacterized protein OS=Dehalococcoides mccartyi (strain CBDB1) GN=cbdbA294 PE=4 SV=1	2.97962	3.06022	0.070842	0.0283745
Q3ZWJ7	cbdbA151	DNA-binding response regulator OS=Dehalococcoides mccartyi (strain CBDB1) GN=cbdbA151 PE=4 SV=1	2.09385	2.21792	0.0648872	0.0572806
Q3ZZB6	cbdbB11	Uncharacterized protein OS=Dehalococcoides mccartyi (strain CBDB1) GN=cbdbA328.1 PE=4 SV=1	2.07595	2.56143	0.125882	0.0639954
Q3ZYG9	cbdbA1237	GTP-binding protein TypA OS=Dehalococcoides mccartyi (strain CBDB1) GN=typA PE=4 SV=1	1.95416	1.74599	0.137172	0.133527	Cellular processes and signaling
Q3ZWL4	cbdbA130	Ni/Fe hydrogenase small subunit OS=Dehalococcoides mccartyi (strain CBDB1) GN=hupS PE=4 SV=1	2.67497	3.13679	0.326359	0.0327853	Xenobiotics biodegradation and metabolism
Q3ZZG7	cbdbA386	DNA-binding response regulator, LuxR family OS=Dehalococcoides mccartyi (strain CBDB1) GN=cbdbA386 PE=4 SV=1	2.49439	2.56129	0.0891242	0.0213627
Q3ZYK7	cbdbA1248	Putative hydrolase OS=Dehalococcoides mccartyi (strain CBDB1) GN=cbdbA1248 PE=4 SV=1	1.95359	1.85954	0.0526491	0.225448
Q3ZXS9	cbdbA912	Superoxide dismutase OS=Dehalococcoides mccartyi (strain CBDB1) GN=sodA PE=3 SV=1	2.09964	2.28683	0.142306	0.133099	Signal transduction; Transport and catabolism
Q3ZW62	cbdbA1677	Protease HtpX homolog OS=Dehalococcoides mccartyi (strain CBDB1) GN=htpX PE=3 SV=1	2.0601	1.95853	0.0891639	0.0496557	Enzyme families
Q3ZZT1	cbdbA484	Methylthioribose-1-phosphate isomerase OS=Dehalococcoides mccartyi (strain CBDB1) GN=mtnA PE=3 SV=1	2.46498	2.05983	0.0301582	0.0787711	Amino acid metabolism
Q3ZZJ0	cbdbA419	NAD kinase OS=Dehalococcoides mccartyi (strain CBDB1) GN=nadK PE=3 SV=1	1.83261	2.23128	0.110996	0.0476125	Metabolism of cofactors and vitamins
Q3ZXC2	cbdbA720	1-deoxy-D-xylulose-5-phosphate synthase OS=Dehalococcoides mccartyi (strain CBDB1) GN=dxs PE=3 SV=1	1.68698	2.04669	0.0957286	0.0296192	Metabolism of cofactors and vitamins; Metabolism of terpenoids and polyketides
Q3ZZT6	cbdbA539	ATP synthase epsilon chain OS=Dehalococcoides mccartyi (strain CBDB1) GN=atpC PE=3 SV=1	2.39178	2.33688	0.0559385	0.384898	Energy metabolism
Q3ZXA4	cbdbA689	Oxidoreductase, short chaindehydrogenase OS=Dehalococcoides mccartyi (strain CBDB1) GN=cbdbA689 PE=3 SV=1	1.96061	2.56442	0.202042	0.101575	Carbohydrate metabolism
Q3ZXZ7	cbdbA983	Uncharacterized protein OS=Dehalococcoides mccartyi (strain CBDB1) GN=cbdbA983 PE=4 SV=1	2.499	2.75234	0.0132118	0.0568908
Q3ZXB8	cbdbA723	50S ribosomal protein L20 OS=Dehalococcoides mccartyi (strain CBDB1) GN=rplT PE=3 SV=1	2.56179	2.82342	0.191711	0.00622841	Translation
Q3ZW44	cbdbA1639	Prephenate dehydratase OS=Dehalococcoides mccartyi (strain CBDB1) GN=pheA PE=4 SV=1	2.04339	2.13292	0.19634	0.141375	Amino acid metabolism
Q3ZWC8	cbdbA58	Putative GTP-binding protein OS=Dehalococcoides mccartyi (strain CBDB1) GN=cbdbA58 PE=4 SV=1	2.17602	2.12676	0.0429445	0.0528849	Translation
Q3ZXM3	cbdbA819	Phosphoribosylamine--glycine ligase OS=Dehalococcoides mccartyi (strain CBDB1) GN=purD PE=3 SV=1	1.704	2.10066	0.0659754	0.0156539	Nucleotide metabolism
Q3ZY94	cbdbA1092	Putative reductive dehalogenase OS=Dehalococcoides mccartyi (strain CBDB1) GN=rdhA PE=4 SV=1	n.d.	1.62722		0.0982141
Q3ZYW5	cbdbA1397	Hydrogenase accessory protein HypB OS=Dehalococcoides mccartyi (strain CBDB1) GN=hypB PE=4 SV=1	2.51826	2.49014	0.146344	0.0624179	Folding, sorting and degradation
Q3ZY12	cbdbA1020	30S ribosomal protein S6 OS=Dehalococcoides mccartyi (strain CBDB1) GN=rpsF PE=3 SV=1	2.82677	2.93484	0.382936	0.0478017	Translation
Q3ZXQ3	cbdbA895	Branched chain amino acid ABC transporter,ATP-binding protein OS=Dehalococcoides mccartyi (strain CBDB1) GN=cbdbA895 PE=3 SV=1	1.77958	2.09757	0.153449	0.0582124	Cellular community - prokaryotes; Membrane transport
Q3ZZM8	cbdbA434	30S ribosomal protein S12 OS=Dehalococcoides mccartyi (strain CBDB1) GN=rpsL PE=3 SV=1	3.19374	2.96532	0.0595381	0.0284162	Translation
Q3ZYZ4	cbdbA1417	Uncharacterized protein OS=Dehalococcoides mccartyi (strain CBDB1) GN=cbdbA1417 PE=4 SV=1	2.18539	2.1238	0.108572	0.0625849
Q3ZZF6	cbdbA343	Nucleoside diphosphate kinase OS=Dehalococcoides mccartyi (strain CBDB1) GN=ndk PE=3 SV=1	2.95305	2.93899	0.0979412	0.0295679	Folding, sorting and degradation; Nucleotide metabolism; Signal transduction
Q3ZYU0	cbdbA1372	Chaperone protein DnaJ OS=Dehalococcoides mccartyi (strain CBDB1) GN=dnaJ PE=3 SV=1	1.81197	1.63638	0.0971143	0.133187	Folding, sorting and degradation; Translation
Q3ZX08	cbdbA577	DNA ligase OS=Dehalococcoides mccartyi (strain CBDB1) GN=ligA PE=3 SV=1	1.4753	1.68021	0.0788746	0.135412	Replication and repair
Q3ZXI1	cbdbA812	Acetolactate synthase, small subunit OS=Dehalococcoides mccartyi (strain CBDB1) GN=ilvN PE=4 SV=1	2.34619	2.59595	0.246324	0.111662	Amino acid metabolism; Carbohydrate metabolism; Metabolism of cofactors and vitamins
Q3ZXD2	cbdbA761	Putative K(+)-stimulated pyrophosphate-energized sodium pump OS=Dehalococcoides mccartyi (strain CBDB1) GN=hppA PE=3 SV=1	2.23514	2.02478	0.145153	0.201284	Energy metabolism
Q3ZXT4	cbdbA906	NifU domain protein OS=Dehalococcoides mccartyi (strain CBDB1) GN=cbdbA906 PE=4 SV=1	1.8647	1.99233	0.0577934	0.0384006	Metabolism
Q3ZZD1	cbdbA309	Inorganic pyrophosphatase OS=Dehalococcoides mccartyi (strain CBDB1) GN=ppa PE=3 SV=1	1.93244	2.43969	0.0450349	0.0345799	Energy metabolism
Q3ZX27	cbdbA610	Response regulator OS=Dehalococcoides mccartyi (strain CBDB1) GN=cbdbA610 PE=4 SV=1	1.41769	1.54668	0.0292978	0.0737934
Q3ZXY6	cbdbA999	Uncharacterized protein OS=Dehalococcoides mccartyi (strain CBDB1) GN=cbdbA999 PE=4 SV=1	2.05283	2.49181	0.216634	0.0747212
Q3ZZS9	cbdbA486	Putative daunorubicin resistance ABC transporter, ATP-binding protein OS=Dehalococcoides mccartyi (strain CBDB1) GN=cbdbA486 PE=4 SV=1	1.92212	1.91897	0.240119	0.0201276	Membrane transport
Q3ZYB5	cbdbA1120	GTP cyclohydrolase 1 OS=Dehalococcoides mccartyi (strain CBDB1) GN=folE PE=3 SV=1	1.95042	2.13428	0.153645	0.0805227	Metabolism of cofactors and vitamins
Q3ZZN3	cbdbA429	Shikimate dehydrogenase (NADP(+)) OS=Dehalococcoides mccartyi (strain CBDB1) GN=aroE PE=3 SV=1	2.02743	2.29617	0.281824	0.0492384	Amino acid metabolism
Q3ZYB1	cbdbA1125	Nucleotidyl transferase family protein OS=Dehalococcoides mccartyi (strain CBDB1) GN=cbdbA1125 PE=4 SV=1	1.72392	1.87007	0.0390625	0.0124567
Q3ZZW0	cbdbA1742	Methionyl-tRNA formyltransferase OS=Dehalococcoides mccartyi (strain CBDB1) GN=fmt PE=3 SV=1	1.94545	2.17312	0.101234	0.135896	Metabolism of cofactors and vitamins; Translation
Q3ZYM9	cbdbA1278	1-(5-phosphoribosyl)-5-[(5-phosphoribosylamino)methylideneamino] imidazole-4-carboxamide isomerase OS=Dehalococcoides mccartyi (strain CBDB1) GN=hisA PE=3 SV=1	1.99568	2.16961	0.147295	0.00652519	Amino acid metabolism
Q3ZYN3	cbdbA1272	50S ribosomal protein L31 OS=Dehalococcoides mccartyi (strain CBDB1) GN=rpmE PE=3 SV=1	2.15399	2.39381	0.401443	0.0912289	Translation
Q3ZYI2	cbdbA1217	Serine protease, DegP OS=Dehalococcoides mccartyi (strain CBDB1) GN=cbdbA1217 PE=4 SV=1	2.67944	2.55978	0.0139482	0.0606311	Drug resistance; Enzyme families; Folding, sorting and degradation; Signal transduction
Q3ZW73	cbdbA1711	UPF0145 protein cbdbA1711 OS=Dehalococcoides mccartyi (strain CBDB1) GN=cbdbA1711 PE=3 SV=1	2.06402	2.38489	0.180158	0.119497
Q3ZW18	cbdbA1610	Uncharacterized protein OS=Dehalococcoides mccartyi (strain CBDB1) GN=cbdbA1610 PE=4 SV=1	2.78172	2.78189	0.0721299	0.0512192
Q3ZW95	cbdbA34	Universal stress family protein OS=Dehalococcoides mccartyi (strain CBDB1) GN=cbdbA34 PE=4 SV=1	1.96444	2.23523	0.134676	0.00920261
Q3ZX17	cbdbA625	Universal stress protein family OS=Dehalococcoides mccartyi (strain CBDB1) GN=cbdbA625 PE=4 SV=1	2.13229	2.26936	0.181474	0.0685585
Q3ZWH9	cbdbA108	Putative helicase (Snf2 family) OS=Dehalococcoides mccartyi (strain CBDB1) GN=cbdbA108 PE=4 SV=1	1.53538	1.66703	0.190441	0.0149359
Q3ZYT4	cbdbA1323	NADPH-dependent FMN reductase OS=Dehalococcoides mccartyi (strain CBDB1) GN=cbdbA1323 PE=4 SV=1	1.96924	2.28318	0.127632	0.0435645
Q3ZY67	cbdbA1069	Cob(I)alamin adenosyltransferase OS=Dehalococcoides mccartyi (strain CBDB1) GN=cobA PE=4 SV=1	1.44594	2.06144	0.322858	0.0425909	Metabolism of cofactors and vitamins
Q3ZW90	cbdbA1	Chromosomal replication initiator protein DnaA OS=Dehalococcoides mccartyi (strain CBDB1) GN=dnaA PE=3 SV=1	1.28543	1.50327	0.101174	0.0712746	Cell growth and death; Replication and repair; Signal transduction
Q3ZWH8	cbdbA109	Uncharacterized protein OS=Dehalococcoides mccartyi (strain CBDB1) GN=cbdbA109 PE=4 SV=1	1.46837	1.39524	0.102315	0.0764435
Q3ZZL0	cbdbA452	30S ribosomal protein S8 OS=Dehalococcoides mccartyi (strain CBDB1) GN=rpsH PE=3 SV=1	2.57406	2.57707	0.0367227	0.270937	Translation
Q3ZYA5	cbdbA1132	Uncharacterized protein OS=Dehalococcoides mccartyi (strain CBDB1) GN=cbdbA1132 PE=4 SV=1	2.41783	2.15796	0.135961	0.0451079
Q3ZYU2	cbdbA1370	Putative transaldolase OS=Dehalococcoides mccartyi (strain CBDB1) GN=tal PE=3 SV=1	2.60661	2.59888	0.174891	0.0452578	Carbohydrate metabolism
Q3ZZL3	cbdbA450	50S ribosomal protein L24 OS=Dehalococcoides mccartyi (strain CBDB1) GN=rplX PE=3 SV=1	3.02516	2.65334	0.0803	0.04649	Translation
Q3ZZK4	cbdbA400	Probable transcriptional regulatory protein cbdbA400 OS=Dehalococcoides mccartyi (strain CBDB1) GN=cbdbA400 PE=3 SV=1	1.61108	1.7905	0.093882	0.0383378
Q3ZY81	cbdbA1106	Hypothetical periplasmic protein OS=Dehalococcoides mccartyi (strain CBDB1) GN=cbdbA1106 PE=4 SV=1	2.90564	2.63826	0.00990993	0.0825944	Poorly characterized
Q3ZYK3	cbdbA1253	Uncharacterized protein OS=Dehalococcoides mccartyi (strain CBDB1) GN=cbdbA1253 PE=4 SV=1	1.7707	2.18939	0.0254778	0.150697	Cell motility
Q3ZYS4	cbdbA1335	GGDEF domain OS=Dehalococcoides mccartyi (strain CBDB1) GN=cbdbA1335 PE=4 SV=1	1.00205	1.52208	0.119597	0.19004
Q3ZWQ2	cbdbA200	Pyrroline-5-carboxylate reductase OS=Dehalococcoides mccartyi (strain CBDB1) GN=proC PE=3 SV=1	1.99452	2.02311	0.0241507	0.070149	Amino acid metabolism
Q3ZZK7	cbdbA397	UvrABC system protein B OS=Dehalococcoides mccartyi (strain CBDB1) GN=uvrB PE=3 SV=1	1.58843	1.60657	0.295061	0.0036554	Replication and repair
Q3ZY99	cbdbA1138	Uncharacterized protein OS=Dehalococcoides mccartyi (strain CBDB1) GN=cbdbA1138 PE=4 SV=1	2.11755	2.49263	0.11218	0.0295795
Q3ZY29	cbdbA1057	Imidazole glycerol phosphate synthase subunit HisF OS=Dehalococcoides mccartyi (strain CBDB1) GN=hisF PE=3 SV=1	2.11455	2.06009	0.110397	0.0663771	Amino acid metabolism
Q3ZYD1	cbdbA1158	Formyltetrahydrofolate deformylase OS=Dehalococcoides mccartyi (strain CBDB1) GN=purU PE=4 SV=1	1.46852	2.03142	0.218093	0.0630639	Carbohydrate metabolism; Metabolism of cofactors and vitamins
Q3ZXW2	cbdbA922	Single-stranded-DNA-specific exonuclease RecJ OS=Dehalococcoides mccartyi (strain CBDB1) GN=recJ PE=4 SV=1	1.81851	1.77856	0.131677	0.0971686	Replication and repair
Q3ZYW1	cbdbA1402	Hydrogenase expression/formation protein HypE OS=Dehalococcoides mccartyi (strain CBDB1) GN=hypE PE=4 SV=1	1.90696	2.23122	0.159011	0.0982427	Genetic information processing
Q3ZZE8	cbdbA353	SAM-dependent methyltransferase UbiE/COQ5 family OS=Dehalococcoides mccartyi (strain CBDB1) GN=cbdbA353 PE=4 SV=1	2.10428	2.24479	0.120146	0.0430396	Metabolism of cofactors and vitamins
Q3ZW47	cbdbA1695	Sec-independent protein translocase protein TatA OS=Dehalococcoides mccartyi (strain CBDB1) GN=tatA PE=3 SV=1	2.70158	3.09365	0.0490797	0.0389179	Folding, sorting and degradation; Membrane transport
Q3ZWB5	cbdbA9	Uncharacterized protein OS=Dehalococcoides mccartyi (strain CBDB1) GN=cbdbA9 PE=4 SV=1	2.05798	2.039	0.0514362	0.0218918
Q3ZW14	cbdbA1614	Putative integral membrane efflux protein OS=Dehalococcoides mccartyi (strain CBDB1) GN=cbdbA1614 PE=4 SV=1	1.93927	1.85477	0.115122	0.169741	Cellular processes and signaling
Q3ZYX1	cbdbA1389	Probable hemolysin-related protein OS=Dehalococcoides mccartyi (strain CBDB1) GN=cbdbA1389 PE=4 SV=1	2.1463	2.28522	0.2032	0.0918804
Q3ZYX8	cbdbA1382	Putative nicotinate-nucleotide pyrophosphorylase OS=Dehalococcoides mccartyi (strain CBDB1) GN=pncB PE=4 SV=1	2.18726	2.17823	0.160607	0.0528441	Metabolism of cofactors and vitamins
Q3ZYH4	cbdbA1232	Sensor histidine kinase OS=Dehalococcoides mccartyi (strain CBDB1) GN=cbdbA1232 PE=4 SV=1	1.80494	2.01441	0.0729806	0.0524687
Q3ZWM5	cbdbA176	Uncharacterized protein OS=Dehalococcoides mccartyi (strain CBDB1) GN=cbdbA176 PE=4 SV=1	2.77561	2.59074	0.056814	0.0570813
Q3ZZS2	cbdbA496	TldD OS=Dehalococcoides mccartyi (strain CBDB1) GN=cbdbA496 PE=4 SV=1	1.73909	2.08353	0.110655	0.0485141	Enzyme families
Q3ZZP2	cbdbA470	30S ribosomal protein S9 OS=Dehalococcoides mccartyi (strain CBDB1) GN=rpsI PE=3 SV=1	2.66985	2.9577	0.628864	0.133065	Translation
Q3ZXD3	cbdbA759	Translin family protein OS=Dehalococcoides mccartyi (strain CBDB1) GN=cbdbA759 PE=4 SV=1	2.25786	1.9355	0.0238217	0.0736098	Genetic information processing
Q3ZW45	cbdbA1638	Putative reductive dehalogenase OS=Dehalococcoides mccartyi (strain CBDB1) GN=rdhA PE=4 SV=1	1.51314	1.75719	0.525714	0.0453169
Q3ZZH2	cbdbA380	Carbohydrate kinase, yjeF-family OS=Dehalococcoides mccartyi (strain CBDB1) GN=cbdbA380 PE=3 SV=1	1.6437	1.8614	0.125718	0.0135912	Metabolism; Metabolism
Q3ZZL7	cbdbA446	50S ribosomal protein L16 OS=Dehalococcoides mccartyi (strain CBDB1) GN=rplP PE=3 SV=1	2.56771	2.67484	0.0699058	0.0739688	Translation
Q3ZYV5	cbdbA1354	GTPase Der OS=Dehalococcoides mccartyi (strain CBDB1) GN=engA PE=3 SV=1	1.64347	1.92272	0.260988	0.116168	Translation
Q3ZXL9	cbdbA824	Imidazoleglycerol-phosphate dehydratase OS=Dehalococcoides mccartyi (strain CBDB1) GN=hisB PE=3 SV=1	2.17118	2.20996	0.201411	0.0932675	Amino acid metabolism
Q3ZZP0	cbdbA472	SIS domain protein OS=Dehalococcoides mccartyi (strain CBDB1) GN=cbdbA472 PE=4 SV=1	1.59134	1.62799	0.0488805	0.126865	Carbohydrate metabolism
Q3ZWA9	cbdbA15	Uncharacterized protein OS=Dehalococcoides mccartyi (strain CBDB1) GN=cbdbA15 PE=4 SV=1	1.90549	2.13915	0.0603541	0.0652714
Q3ZZI3	cbdbA368.1	Uncharacterized protein OS=Dehalococcoides mccartyi (strain CBDB1) GN=cbdbA368.1 PE=4 SV=1	2.35	3.11872	0.436715	0.0938302
Q3ZZC0	cbdbA323	Phosphoribosylformylglycinamidine synthase subunit PurQ OS=Dehalococcoides mccartyi (strain CBDB1) GN=purQ PE=4 SV=1	1.68055	1.67446	0.0537712	0.0866784	Nucleotide metabolism
Q3ZXT0	cbdbA911	Bacterioferritin domain protein OS=Dehalococcoides mccartyi (strain CBDB1) GN=cbdbA911 PE=4 SV=1	Id.	1.66575		0.145955	Metabolism of cofactors and vitamins
Q3ZY77	cbdbA1110	DNA mismatch repair protein MutL OS=Dehalococcoides mccartyi (strain CBDB1) GN=mutL PE=3 SV=1	0.86779	1.59918	1.06955	0.074884	Replication and repair
Q3ZXZ8	cbdbA982	Uncharacterized protein OS=Dehalococcoides mccartyi (strain CBDB1) GN=cbdbA982 PE=4 SV=1	3.19523	3.21878	0.339101	0.049286
Q3ZZC2	cbdbA320	Elongation factor Ts OS=Dehalococcoides mccartyi (strain CBDB1) GN=tsf PE=3 SV=1	3.30932	3.20002	0.0405483	0.00604504	Translation
Q3ZWT8	cbdbA219	L-lysine 2,3-aminomutase homologe, probable frameshift OS=Dehalococcoides mccartyi (strain CBDB1) GN=kamA PE=4 SV=1	1.32775	1.42122	0.0482966	0.055526	Amino acid metabolism
Q3ZXV7	cbdbA931	30S ribosomal protein S15 OS=Dehalococcoides mccartyi (strain CBDB1) GN=rpsO PE=3 SV=1	2.79531	2.66334	0.159884	0.118417	Translation
Q3ZX78	cbdbA670	Elongation factor P OS=Dehalococcoides mccartyi (strain CBDB1) GN=efp PE=3 SV=1	1.47274	1.40463	0.38011	0.141272	Translation
Q3ZYI9	cbdbA1206	N utilization substance protein B homolog OS=Dehalococcoides mccartyi (strain CBDB1) GN=nusB PE=3 SV=1	2.16516	2.37899	0.108669	0.059226	Transcription; Translation
Q3ZZG0	cbdbA368	Deoxyuridine 5'-triphosphatenucleotidohydrolase OS=Dehalococcoides mccartyi (strain CBDB1) GN=dut PE=4 SV=1	2.18825	2.16114	0.0288375	0.0433285	Nucleotide metabolism; Replication and repair
Q3ZYN5	cbdbA1270	50S ribosomal protein L21 OS=Dehalococcoides mccartyi (strain CBDB1) GN=rplU PE=3 SV=1	1.91753	1.95735	0.279738	0.228174	Translation
Q3ZZI0	cbdbA371	Amino acid ABC transporter, periplasmic aminoacid-binding protein OS=Dehalococcoides mccartyi (strain CBDB1) GN=cbdbA371 PE=4 SV=1	2.66082	2.49565	0.0631584	0.0328258	Membrane transport
Q3ZWX2	cbdbA562	Nucleoid-associated protein cbdbA562 OS=Dehalococcoides mccartyi (strain CBDB1) GN=cbdbA562 PE=3 SV=1	2.93406	2.89645	0.189779	0.0454396	Poorly characterized
Q3ZYQ6	cbdbA1303	Pilin biogenesis protein OS=Dehalococcoides mccartyi (strain CBDB1) GN=pilC PE=3 SV=1	2.0834	1.77973	0.173925	0.110224	Cell motility; Membrane transport
Q3ZWU2	cbdbA274	Protein translocase subunit SecD OS=Dehalococcoides mccartyi (strain CBDB1) GN=secD PE=3 SV=1	2.46151	2.49267	0.215861	0.138084	Folding, sorting and degradation; Membrane transport
Q3ZWT5	cbdbA226	ABC transporter, ATP-binding protein OS=Dehalococcoides mccartyi (strain CBDB1) GN=cbdbA226 PE=3 SV=1	1.08591	1.52839	0.143857	0.0290043	Translation
Q3ZWN3	cbdbA167	Phosphate-specific transport system accessory protein PhoU OS=Dehalococcoides mccartyi (strain CBDB1) GN=phoU PE=3 SV=1	1.93438	2.04256	0.234861	0.0186274	Cellular processes and signaling
Q3ZWX4	cbdbA560	Magnesium and cobalt transport protein CorA OS=Dehalococcoides mccartyi (strain CBDB1) GN=corA PE=4 SV=1	1.7225	1.92295	0.170723	0.119549	Membrane transport
Q3ZX48	cbdbA647	DNA-binding response regulator, LuxR family OS=Dehalococcoides mccartyi (strain CBDB1) GN=cbdbA647 PE=4 SV=1	1.91315	2.08132	0.0552678	0.0578898
Q3ZY97	cbdbA1113	Aspartate carbamoyltransferase OS=Dehalococcoides mccartyi (strain CBDB1) GN=pyrB PE=3 SV=1	1.89109	1.94141	0.0463935	0.0836889	Amino acid metabolism; Nucleotide metabolism
Q3ZZ15	cbdbA1444	Anthranilate phosphoribosyltransferase OS=Dehalococcoides mccartyi (strain CBDB1) GN=trpD PE=3 SV=1	1.77742	2.01462	0.113276	0.0328788	Amino acid metabolism
Q3ZY13	cbdbA1019	Single-stranded DNA-binding protein OS=Dehalococcoides mccartyi (strain CBDB1) GN=ssb PE=4 SV=1	2.93536	2.81692	0.0555251	0.0440973	Replication and repair; Translation
Q3ZWB8	cbdbA72	DNA repair protein radA OS=Dehalococcoides mccartyi (strain CBDB1) GN=radA PE=3 SV=1	1.55305	1.58141	0.0584124	0.195994	Replication and repair
Q3ZWU7	cbdbA268	Uncharacterized protein OS=Dehalococcoides mccartyi (strain CBDB1) GN=cbdbA268 PE=4 SV=1	1.88155	1.9183	0.0378151	0.0684355
Q3ZXD9	cbdbA751	Single-stranded nucleic acid binding R3H domain protein OS=Dehalococcoides mccartyi (strain CBDB1) GN=cbdbA751 PE=4 SV=1	1.27647	1.68849	0.343512	0.105676
Q3ZXZ6	cbdbA985	ACT domain protein OS=Dehalococcoides mccartyi (strain CBDB1) GN=cbdbA985 PE=4 SV=1	2.46531	2.5781	0.253744	0.0186773
Q3ZZJ3	cbdbA415	HIT domain protein OS=Dehalococcoides mccartyi (strain CBDB1) GN=cbdbA415 PE=4 SV=1	1.91684	2.24166	0.099094	0.0707968	Transport and catabolism
Q3ZX79	cbdbA669	PHP domain protein OS=Dehalococcoides mccartyi (strain CBDB1) GN=cbdbA669 PE=4 SV=1	1.95411	1.90506	0.234969	0.0535948
Q3ZZC7	cbdbA314	1-deoxy-D-xylulose 5-phosphate reductoisomerase OS=Dehalococcoides mccartyi (strain CBDB1) GN=dxr PE=3 SV=1	1.68736	1.75577	0.0700374	0.0603702	Metabolism of terpenoids and polyketides
Q3ZZF5	cbdbA344	Glycoprotease family protein OS=Dehalococcoides mccartyi (strain CBDB1) GN=cbdbA344 PE=4 SV=1	1.55819	1.5905	0.207329	0.0912238
Q3ZYR5	cbdbA1348	DNA-directed DNA polymerase I OS=Dehalococcoides mccartyi (strain CBDB1) GN=polA PE=3 SV=1	1.23008	1.20419	0.192144	0.0881027	Nucleotide metabolism; Replication and repair
Q3ZWH0	cbdbA122	Mrp family protein OS=Dehalococcoides mccartyi (strain CBDB1) GN=cbdbA122 PE=4 SV=1	1.80903	2.11527	0.0472854	0.0107658
Q3ZXD7	cbdbA754	tRNA-specific 2-thiouridylase MnmA OS=Dehalococcoides mccartyi (strain CBDB1) GN=mnmA PE=3 SV=1	1.73486	1.83154	0.0841295	0.0146303	Folding, sorting and degradation; Translation
Q3ZXA3	cbdbA691	GTPase HflX OS=Dehalococcoides mccartyi (strain CBDB1) GN=hflX PE=3 SV=1	1.68218	1.77384	0.313057	0.0633383	Translation
Q3ZY11	cbdbA1021	Conserved domain protein OS=Dehalococcoides mccartyi (strain CBDB1) GN=cbdbA1021 PE=4 SV=1	2.77819	2.62809	0.052885	0.0196376
Q3ZZJ1	cbdbA417	Acetyltransferase, GNAT family OS=Dehalococcoides mccartyi (strain CBDB1) GN=cbdbA417 PE=4 SV=1	2.0401	2.12256	0.073822	0.122924	Amino acid metabolism
Q3ZWF6	cbdbA83	DNA-binding response regulator OS=Dehalococcoides mccartyi (strain CBDB1) GN=rdhD PE=4 SV=1	1.62813	2.07397	0.167123	0.108611	Cellular community - prokaryotes; Signal transduction
Q3ZZ04	cbdbA1457	Thymidylate synthase ThyX OS=Dehalococcoides mccartyi (strain CBDB1) GN=thyX PE=3 SV=1	1.87075	2.15912	0.0630399	0.0559858	Metabolism of cofactors and vitamins; Nucleotide metabolism
Q3ZZI8	cbdbA423	Prephenate dehydrogenase OS=Dehalococcoides mccartyi (strain CBDB1) GN=cbdbA423 PE=4 SV=1	1.35562	2.25378	0.122326	0.130179	Amino acid metabolism; Biosynthesis of other secondary metabolites
Q3ZX82	cbdbA666	ATP-dependent Clp protease proteolytic subunit OS=Dehalococcoides mccartyi (strain CBDB1) GN=clpP PE=3 SV=1	1.43274	2.26772	0.309085	0.124305	Cell growth and death; Enzyme families
Q3ZXM2	cbdbA820	N5-carboxyaminoimidazole ribonucleotide mutase OS=Dehalococcoides mccartyi (strain CBDB1) GN=purE PE=3 SV=1	1.94428	2.24086	0.166126	0.0347497	Nucleotide metabolism
Q3ZZU8	cbdbA527	DNA primase OS=Dehalococcoides mccartyi (strain CBDB1) GN=dnaG PE=3 SV=1	1.23861	1.54344	0.211487	0.0178	Replication and repair
Q3ZY25	cbdbA1004	DegV family protein OS=Dehalococcoides mccartyi (strain CBDB1) GN=cbdbA1004 PE=4 SV=1	1.76354	1.90799	0.141559	0.0306777
Q3ZWL0	cbdbA136	ABC transporter, ATP-binding protein OS=Dehalococcoides mccartyi (strain CBDB1) GN=cbdbA136 PE=3 SV=1	1.59695	1.7427	0.0740227	0.123285
Q3ZZW3	cbdbA1738	30S ribosomal protein S20 OS=Dehalococcoides mccartyi (strain CBDB1) GN=rpsT PE=3 SV=1	1.92222	2.67656	0.133228	0.161109	Translation
Q3ZWU8	cbdbA267	Uncharacterized protein OS=Dehalococcoides mccartyi (strain CBDB1) GN=cbdbA267 PE=4 SV=1	1.91055	2.17893	0.17968	0.0333638
Q3ZYH0	cbdbB26	Uncharacterized protein OS=Dehalococcoides mccartyi (strain CBDB1) GN=cbdbA1236 PE=4 SV=1	3.45591	3.46729	0.144806	0.0755764
Q3ZW74	cbdbA1710	Transcriptional regulator, AbrB family OS=Dehalococcoides mccartyi (strain CBDB1) GN=cbdbA1710 PE=4 SV=1	2.00387	1.90214	0.139803	0.119934
Q3ZXL0	cbdbA834	ABC transproter, ATP-binding protein OS=Dehalococcoides mccartyi (strain CBDB1) GN=cbdbA834 PE=4 SV=1	1.29673	1.71567	0.303659	0.0561544	Membrane transport
Q3ZVX6	cbdbA1601	Sensor histidine kinase/response regulator OS=Dehalococcoides mccartyi (strain CBDB1) GN=rdhCD PE=4 SV=1	1.5143	1.44554	0.148575	0.0665342
Q3ZW97	cbdbA32	Putative potassium uptake protein, TrkA homolog OS=Dehalococcoides mccartyi (strain CBDB1) GN=cbdbA32 PE=4 SV=1	2	1.99328	0.209179	0.119569	Membrane transport
Q3ZYC6	cbdbA1164	Putative iron-sulfur flavoprotein OS=Dehalococcoides mccartyi (strain CBDB1) GN=cbdbA1164 PE=4 SV=1	2.04524	2.08122	0.0967809	0.042031
Q3ZX14	cbdbA628	Putative ribose-5-phosphate isomerase OS=Dehalococcoides mccartyi (strain CBDB1) GN=rpiB PE=4 SV=1	1.67808	1.92038	0.0895916	0.118449	Carbohydrate metabolism; Energy metabolism
Q3ZZJ2	cbdbA416	MutT OS=Dehalococcoides mccartyi (strain CBDB1) GN=cbdbA416 PE=4 SV=1	2.17067	2.12753	0.102578	0.140177	Nucleotide metabolism
Q3ZX02	cbdbA584	Riboflavin biosynthesis protein RibF OS=Dehalococcoides mccartyi (strain CBDB1) GN=ribF PE=4 SV=1	1.82017	2.23617	0.0496989	0.0138927	Metabolism of cofactors and vitamins
Q3ZY52	cbdbA1086	ABC transporter, ATP-binding/permease protein OS=Dehalococcoides mccartyi (strain CBDB1) GN=cbdbA1086 PE=3 SV=1	0.79269	1.42889	0.159827	0.10023	Membrane transport
Q3ZWR1	cbdbA189	ATP-dependent RNA helicase, DEAD OS=Dehalococcoides mccartyi (strain CBDB1) GN=cbdbA189 PE=3 SV=1	Id.	1.16266		0.274184	Folding, sorting and degradation; Translation
Q3ZZU7	cbdbA528	Putative deoxyguanosinetriphosphate triphosphohydrolase OS=Dehalococcoides mccartyi (strain CBDB1) GN=cbdbA528 PE=4 SV=1	1.48477	1.76136	0.313844	0.118272	Nucleotide metabolism
Q3ZVY0	cbdbA1596	Transcriptional regulator, MarR family OS=Dehalococcoides mccartyi (strain CBDB1) GN=rdhR PE=4 SV=1	2.29553	2.08467	0.0563717	0.0226233
Q3ZW93	cbdbA37	Putative potassium uptake protein, TrkA homologe OS=Dehalococcoides mccartyi (strain CBDB1) GN=cbdbA37 PE=4 SV=1	1.95328	1.80215	0.0564393	0.1592	Membrane transport
Q3ZYF3	cbdbA1193	DegV family protein OS=Dehalococcoides mccartyi (strain CBDB1) GN=cbdbA1193 PE=4 SV=1	1.50198	1.69332	0.27703	0.149864
Q3ZVY4	cbdbA1591	Sensor histidine kinase/response regulator OS=Dehalococcoides mccartyi (strain CBDB1) GN=cbdbA1591 PE=4 SV=1	1.3317	1.01847	0.401595	0.255601
Q3ZZB3	cbdbA332	Uncharacterized protein OS=Dehalococcoides mccartyi (strain CBDB1) GN=cbdbA332 PE=4 SV=1	1.3658	2.06617	0.694269	0.122942
Q3ZZA4	cbdbA281	Ribosomal RNA small subunit methyltransferase H OS=Dehalococcoides mccartyi (strain CBDB1) GN=rsmH PE=3 SV=1	2.0601	1.62273	0.0700088	0.282129	Translation
Q3ZZQ2	cbdbA460	Methionine aminopeptidase OS=Dehalococcoides mccartyi (strain CBDB1) GN=map PE=3 SV=1	1.69837	1.76137	0.282347	0.17698	Enzyme families
Q3ZYY7	cbdbA1426	Putative ribosomal subunit interface protein OS=Dehalococcoides mccartyi (strain CBDB1) GN=cbdbA1426 PE=4 SV=1	2.32763	2.39905	0.0740384	0.0884121	Translation
Q3ZWJ9	cbdbA149	Cobyrinate a,c-diamide synthase OS=Dehalococcoides mccartyi (strain CBDB1) GN=cbiA PE=3 SV=1	2.0284	2.08615	0.1709	0.0464493	Metabolism of cofactors and vitamins
Q3ZWD8	cbdbA42	Guanylate kinase OS=Dehalococcoides mccartyi (strain CBDB1) GN=gmk PE=3 SV=1	1.82366	1.94216	0.434371	0.0667539	Nucleotide metabolism
Q3ZXT1	cbdbA909	Hsp20 OS=Dehalococcoides mccartyi (strain CBDB1) GN=cbdbA909 PE=3 SV=1	1.94455	1.95816	0.0528252	0.264268	Folding, sorting and degradation
Q3ZY45	cbdbA1039	ABC-type dipeptide/oligopeptide/nickel transport system, periplasmic component OS=Dehalococcoides mccartyi (strain CBDB1) GN=cbdbA1039 PE=4 SV=1	1.76251	1.85028	0.299424	0.0680552	Cellular community - prokaryotes; Drug resistance; Membrane transport
Q3ZYM4	cbdbA1285	Uncharacterized protein OS=Dehalococcoides mccartyi (strain CBDB1) GN=cbdbA1285 PE=4 SV=1	2.14462	2.07156	0.871089	0.081574
Q3ZWD6	cbdbA45	PyrK family protein OS=Dehalococcoides mccartyi (strain CBDB1) GN=cbdbA45 PE=4 SV=1	1.81089	1.84615	0.0765611	0.0468793	Metabolism
Q3ZZ80	cbdbA1519	Putative CRISPR-associated protein OS=Dehalococcoides mccartyi (strain CBDB1) GN=cbdbA1519 PE=4 SV=1	2.07159	1.88991	0.200954	0.12641	Transport and catabolism
Q3ZZ03	cbdbA1458	Peptide ABC transporter, ATP-binding protein OS=Dehalococcoides mccartyi (strain CBDB1) GN=cbdbA1458 PE=3 SV=1	1.37294	1.60606	0.051153	0.074016
Q3ZYT6	cbdbA1377	Amidophosphoribosyltransferase OS=Dehalococcoides mccartyi (strain CBDB1) GN=purF PE=3 SV=1	1.9872	1.64033	0.285609	0.0408365	Amino acid metabolism; Enzyme families; Nucleotide metabolism
Q3ZW81	cbdbA1703	Uncharacterized protein OS=Dehalococcoides mccartyi (strain CBDB1) GN=cbdbA1703 PE=4 SV=1	Id.	1.81216		0.0770126	Poorly characterized
Q3ZXV5	cbdbA933	4-hydroxy-tetrahydrodipicolinate reductase OS=Dehalococcoides mccartyi (strain CBDB1) GN=dapB PE=3 SV=1	2.00362	2.13503	0.0653653	0.0462317	Amino acid metabolism; Biosynthesis of other secondary metabolites
Q3ZX32	cbdbA616	D-ala D-alanine ligase OS=Dehalococcoides mccartyi (strain CBDB1) GN=ddl PE=4 SV=1	2.00863	1.84547	0.0396753	0.0844774	Drug resistance; Glycan biosynthesis and metabolism; Metabolism of other amino acids
Q3ZZ38	cbdbA1470	Uncharacterized protein OS=Dehalococcoides mccartyi (strain CBDB1) GN=cbdbA1470 PE=4 SV=1	1.50285	1.84087	0.101428	0.0231674	Transcription
Q3ZXB1	cbdbA730	Uncharacterized protein OS=Dehalococcoides mccartyi (strain CBDB1) GN=cbdbA730 PE=3 SV=1	1.6468	2.02562	0.0173556	0.0375761	Metabolism
Q3ZZW5	cbdbA1735	MazG family protein OS=Dehalococcoides mccartyi (strain CBDB1) GN=cbdbA1735 PE=4 SV=1	1.35384	1.54108	0.1814	0.0467037	Replication and repair
Q3ZWM2	cbdbA181	Putative threonine aldolase (COG2008) OS=Dehalococcoides mccartyi (strain CBDB1) GN=gly1 PE=4 SV=1	1.67201	1.66422	0.406025	0.121991	Amino acid metabolism
Q3ZYZ3	cbdbA1418	Uncharacterized protein OS=Dehalococcoides mccartyi (strain CBDB1) GN=cbdbA1418 PE=4 SV=1	1.68093	1.84131	0.0646933	0.0490642
Q3ZWC7	cbdbA59	Uncharacterized protein OS=Dehalococcoides mccartyi (strain CBDB1) GN=cbdbA59 PE=4 SV=1	1.64739	1.67351	0.557154	0.163755
Q3ZYF2	cbdbA1194	ATP-dependent DNA helicase RecG OS=Dehalococcoides mccartyi (strain CBDB1) GN=recG PE=4 SV=1	1.0108	0.860864	0.700559	0.19583	Replication and repair
Q3ZYG5	cbdbA1178	Twitching mobility protein OS=Dehalococcoides mccartyi (strain CBDB1) GN=pilT PE=4 SV=1	1.65834	1.72776	0.103859	0.118281	Cell motility; Membrane transport
Q3ZWZ6	cbdbA592	Uncharacterized protein OS=Dehalococcoides mccartyi (strain CBDB1) GN=cbdbA592 PE=4 SV=1	2.78007	2.7264	0.264188	0.0216878
Q3ZX06	cbdbA579	Glutamine amidotransferase subunit PdxT OS=Dehalococcoides mccartyi (strain CBDB1) GN=pdxT PE=3 SV=1	1.28385	1.77626	0.129337	0.0670077	Metabolism of cofactors and vitamins
Q3ZYT3	cbdbA1324	Dihydroorotate dehydrogenase OS=Dehalococcoides mccartyi (strain CBDB1) GN=pyrD PE=3 SV=1	2.15443	2.05637	0.0664806	0.00849586	Nucleotide metabolism
Q3ZW91	cbdbA5	GTP pyrophosphokinase OS=Dehalococcoides mccartyi (strain CBDB1) GN=relA PE=3 SV=1	1.55875	1.54206	0.0431119	0.22921	Nucleotide metabolism
Q3ZVU5	cbdbA1532	Putative transcriptional regulator OS=Dehalococcoides mccartyi (strain CBDB1) GN=cbdbA1532 PE=4 SV=1	1.84774	1.48797	0.154741	0.232338
Q3ZW24	cbdbA1663	Mechanosensitive ion channel family protein OS=Dehalococcoides mccartyi (strain CBDB1) GN=cbdbA1663 PE=4 SV=1	2.28243	1.99667	0.0954324	0.0682093
Q3ZZS4	cbdbA493	Uncharacterized protein OS=Dehalococcoides mccartyi (strain CBDB1) GN=cbdbA493 PE=4 SV=1	1.65131	2.00328	0.0689394	0.0568023	Poorly characterized
Q3ZZP9	cbdbA463	30S ribosomal protein S13 OS=Dehalococcoides mccartyi (strain CBDB1) GN=rpsM PE=3 SV=1	3.16849	2.87548	0.0907368	0.133621	Translation
Q3ZW75	cbdbA1709	HIT domain protein OS=Dehalococcoides mccartyi (strain CBDB1) GN=cbdbA1709 PE=4 SV=1	1.88364	1.93907	0.435895	0.0956051	Nucleotide metabolism
Q3ZYX6	cbdbA1384	SAM-dependent methyltransferase UbiE/COQ5 family OS=Dehalococcoides mccartyi (strain CBDB1) GN=cbdbA1384 PE=4 SV=1	1.16127	1.76476	0.45294	0.0935662	Metabolism
Q3ZXY8	cbdbA995	Uncharacterized protein OS=Dehalococcoides mccartyi (strain CBDB1) GN=cbdbA995 PE=4 SV=1	1.59539	2.83654	0.766046	0.140574
Q3ZX26	cbdbA618	Cation ABC transporter, periplasmc-binding protein OS=Dehalococcoides mccartyi (strain CBDB1) GN=cbdbA618 PE=3 SV=1	2.42927	2.05808	0.116165	0.0924119	Membrane transport
Q3ZZ12	cbdbA1449	3-deoxy-D-arabino-heptulosonate 7-phosphate (DAHP) synthetase OS=Dehalococcoides mccartyi (strain CBDB1) GN=aroA PE=4 SV=1	1.65645	1.946	0.213442	0.00749444	Amino acid metabolism
Q3ZX09	cbdbA576	Peptidyl-tRNA hydrolase OS=Dehalococcoides mccartyi (strain CBDB1) GN=pth PE=3 SV=1	Id.	1.58826		0.132028	Translation
Q3ZYB6	cbdbA1119	Dihydroorotate dehydrogenase, electron transfersubunit OS=Dehalococcoides mccartyi (strain CBDB1) GN=pyrK PE=4 SV=1	1.56092	1.81714	0.183011	0.048198	Nucleotide metabolism
Q3ZX40	cbdbA660	Formate--tetrahydrofolate ligase OS=Dehalococcoides mccartyi (strain CBDB1) GN=fhs PE=3 SV=1	1.68882	1.53949	0.0992014	0.126775	Energy metabolism; Metabolism of cofactors and vitamins
Q3ZZQ5	cbdbA457	50S ribosomal protein L15 OS=Dehalococcoides mccartyi (strain CBDB1) GN=rplO PE=3 SV=1	2.38328	2.54403	0.061892	0.150149	Translation
Q3ZYX0	cbdbA1390	tRNA N6-adenosine threonylcarbamoyltransferase OS=Dehalococcoides mccartyi (strain CBDB1) GN=tsaD PE=3 SV=1	1.6602	1.76472	0.088132	0.0188739	Translation
Q3ZZ96	cbdbA292	GatB domain containing protein OS=Dehalococcoides mccartyi (strain CBDB1) GN=cbdbA292 PE=4 SV=1	1.93538	1.95285	0.0789	0.0420001	Poorly characterized
Q3ZZR9	cbdbA500	Glucose-1-phosphate thymidylyltransferase OS=Dehalococcoides mccartyi (strain CBDB1) GN=cbdbA500 PE=4 SV=1	1.42814	1.76516	0.0799921	0.293548	Biosynthesis of other secondary metabolites; Metabolism of terpenoids and polyketides
Q3ZZT5	cbdbA540	Ribosome maturation factor RimM OS=Dehalococcoides mccartyi (strain CBDB1) GN=rimM PE=3 SV=1	1.00286	1.88006	0.367307	0.0196863	Translation
Q3ZYU8	cbdbA1363	Uncharacterized protein OS=Dehalococcoides mccartyi (strain CBDB1) GN=cbdbA1363 PE=4 SV=1	2.0351	2.5983	0.97925	0.0381798
Q3ZWI2	cbdbA105	Putative type I restriction enzyme, specificity protein OS=Dehalococcoides mccartyi (strain CBDB1) GN=cbdbA105 PE=4 SV=1	0.928654	1.72576	0.389471	0.0853861	Transport and catabolism
Q3ZZK9	cbdbA428	Shikimate kinase OS=Dehalococcoides mccartyi (strain CBDB1) GN=aroK PE=3 SV=1	1.7804	1.46034	0.252169	0.0818108	Amino acid metabolism
Q3ZYH8	cbdbA1225	Ribonuclease PH OS=Dehalococcoides mccartyi (strain CBDB1) GN=rph PE=3 SV=1	1.75069	2.05702	0.0604055	0.0169917	Translation
Q3ZY31	cbdbA1054	Uncharacterized protein OS=Dehalococcoides mccartyi (strain CBDB1) GN=cbdbA1054 PE=4 SV=1	2.78918	2.5765	0.0477871	0.0280238
Q3ZX70	cbdbA680	Pyruvic-ferredoxin oxidoreductase, delta subunit OS=Dehalococcoides mccartyi (strain CBDB1) GN=porD PE=4 SV=1	2.1738	2.71541	0.322435	0.044021	Carbohydrate metabolism; Energy metabolism; Xenobiotics biodegradation and metabolism
Q3ZXD8	cbdbA752	Thymidylate kinase OS=Dehalococcoides mccartyi (strain CBDB1) GN=tmk PE=3 SV=1	1.76689	2.18255	0.0626292	0.040398	Nucleotide metabolism
Q3ZWQ4	cbdbA198	Ferredoxin, iron-sulfur cluster-binding protein OS=Dehalococcoides mccartyi (strain CBDB1) GN=fdx1 PE=4 SV=1	3.34918	3.03472	0.0892386	0.0364972
Q3ZY10	cbdbA1023	Putative translation initiation inhibitor OS=Dehalococcoides mccartyi (strain CBDB1) GN=cbdbA1023 PE=4 SV=1	2.63794	2.61673	0.067029	0.0423311	Metabolism
Q3ZZA9	cbdbA276	Putative DNA-binding protein OS=Dehalococcoides mccartyi (strain CBDB1) GN=cbdbA276 PE=4 SV=1	2.63383	2.59891	0.0798228	0.0102478
Q3ZY42	cbdbA1042	Sensor histidine kinase OS=Dehalococcoides mccartyi (strain CBDB1) GN=cbdbA1042 PE=4 SV=1	1.08753	0.898147	0.199825	0.284782
Q3ZX21	cbdbA621	Uncharacterized protein OS=Dehalococcoides mccartyi (strain CBDB1) GN=cbdbA621 PE=4 SV=1	1.9059	1.92126	0.0267901	0.0572472
Q3ZZX7	cbdbA1720	Putative desulforedoxin OS=Dehalococcoides mccartyi (strain CBDB1) GN=cbdbA1720 PE=4 SV=1	2.7185	2.59868	0.0954241	0.0715229
Q3ZZ79	cbdbB36	Uncharacterized protein OS=Dehalococcoides mccartyi (strain CBDB1) GN=cbdbA1519.1 PE=4 SV=1	Id.	1.48643		0.129169	Transport and catabolism
Q3ZW54	cbdbA1686	ApbE OS=Dehalococcoides mccartyi (strain CBDB1) GN=cbdbA1686 PE=4 SV=1	1.52676	1.52694	0.11058	0.0537713	Metabolism
Q3ZWZ9	cbdbA588	Holliday junction ATP-dependent DNA helicase RuvB OS=Dehalococcoides mccartyi (strain CBDB1) GN=ruvB PE=3 SV=1	Id.	1.59368		0.160766	Replication and repair
Q3ZWD7	cbdbA43	UPF0296 protein cbdbA43 OS=Dehalococcoides mccartyi (strain CBDB1) GN=cbdbA43 PE=3 SV=1	2.19025	2.17189	0.196004	0.0579452	Poorly characterized
Q3ZXU8	cbdbA942	Glycosyl transferase, group 1 family protein OS=Dehalococcoides mccartyi (strain CBDB1) GN=cbdbA942 PE=4 SV=1	2.12214	1.51884	0.124735	0.241632	Glycan biosynthesis and metabolism
Q3ZZS5	cbdbA492	PBS lyase HEAT-like repeat domain protein OS=Dehalococcoides mccartyi (strain CBDB1) GN=cbdbA492 PE=4 SV=1	1.50559	1.06545	0.103414	0.0295284
Q3ZYC4	cbdbA1167	Uncharacterized protein OS=Dehalococcoides mccartyi (strain CBDB1) GN=cbdbA1167 PE=4 SV=1	1.76757	1.78316	0.136424	0.0750195
Q3ZW80	cbdbA1704	PHP domain N-terminal region family protein OS=Dehalococcoides mccartyi (strain CBDB1) GN=cbdbA1704 PE=4 SV=1	1.40306	1.72611	0.0887787	0.111877	Metabolism
Q3ZXJ0	cbdbA801	RNA-splicing ligase RtcB OS=Dehalococcoides mccartyi (strain CBDB1) GN=cbdbA801 PE=3 SV=1	1.40473	0.957981	0.0435622	0.393357	Translation
Q3ZXR0	cbdbA887	Hydrolase, TatD family OS=Dehalococcoides mccartyi (strain CBDB1) GN=cbdbA887 PE=4 SV=1	1.7518	1.89701	0.223624	0.114196	Genetic information processing
Q3ZYG8	cbdbA1203	50S ribosomal protein L32 OS=Dehalococcoides mccartyi (strain CBDB1) GN=rpmF PE=3 SV=1	2.97721	2.99684	0.273262	0.0901825	Translation
Q3ZZB7	cbdbA328	Iron-sulfur cluster-binding protein, Rieske domain OS=Dehalococcoides mccartyi (strain CBDB1) GN=cbdbA328 PE=4 SV=1	2.21086	2.09519	0.133184	0.0883922
Q3ZZR3	cbdbA510	Uncharacterized protein OS=Dehalococcoides mccartyi (strain CBDB1) GN=cbdbA510 PE=4 SV=1	1.76955	2.14105	0.0770523	0.0445262
Q3ZW15	cbdbA1613	Hypothetical upf0313 protein OS=Dehalococcoides mccartyi (strain CBDB1) GN=cbdbA1613 PE=4 SV=1	1.04881	1.10338	0.0495352	0.122648
Q3ZZI2	cbdbA369	Amino acid ABC transporter, ATP-binding protein OS=Dehalococcoides mccartyi (strain CBDB1) GN=cbdbA369 PE=3 SV=1	1.98778	1.18032	0.0821447	0.311315
Q3ZZP8	cbdbA464	30S ribosomal protein S11 OS=Dehalococcoides mccartyi (strain CBDB1) GN=rpsK PE=3 SV=1	3.23354	2.93775	0.196632	0.0533956	Translation
Q3ZZ98	cbdbA289	Uncharacterized protein OS=Dehalococcoides mccartyi (strain CBDB1) GN=cbdbA289 PE=4 SV=1	1.67182	1.86269	0.066085	0.116629
Q3ZXD4	cbdbA758	Thiamine-phosphate synthase OS=Dehalococcoides mccartyi (strain CBDB1) GN=thiE PE=3 SV=1	1.47712	1.71963	0.171649	0.0313843	Metabolism of cofactors and vitamins
Q3ZYA1	cbdbA1136	HAD-superfamily hydrolase, subfamily IIB OS=Dehalococcoides mccartyi (strain CBDB1) GN=cbdbA1136 PE=4 SV=1	1.12171	1.71101	0.0348718	0.075095
Q3ZXY1	cbdbA953	Uncharacterized protein OS=Dehalococcoides mccartyi (strain CBDB1) GN=cbdbA953 PE=4 SV=1	2.07395	1.98465	0.116136	0.120292
Q3ZYV3	cbdbA1356	Glycerol-3-phosphate dehydrogenase [NAD(P)+] OS=Dehalococcoides mccartyi (strain CBDB1) GN=gpsA PE=3 SV=1	1.43676	1.75864	0.415675	0.0761686	Lipid metabolism
Q3ZZF4	cbdbA346	Uncharacterized protein OS=Dehalococcoides mccartyi (strain CBDB1) GN=cbdbA346 PE=4 SV=1	1.5676	1.8964	0.300059	0.0474138	Translation
Q3ZW36	cbdbA1648	Conserved domain protein OS=Dehalococcoides mccartyi (strain CBDB1) GN=cbdbA1648 PE=4 SV=1	0.802463	1.68162	0.057217	0.191457
Q3ZYI5	cbdbA1212	Glutamate 5-kinase OS=Dehalococcoides mccartyi (strain CBDB1) GN=proB PE=3 SV=1	1.79667	1.67201	0.106412	0.0175888	Amino acid metabolism; Biosynthesis of other secondary metabolites
Q3ZW96	cbdbA33	Putative potassium uptake protein OS=Dehalococcoides mccartyi (strain CBDB1) GN=cbdbA33 PE=4 SV=1	1.26807	1.77504	0.264822	0.199909	Membrane transport
Q3ZYJ6	cbdbA1260	Uncharacterized protein OS=Dehalococcoides mccartyi (strain CBDB1) GN=cbdbA1260 PE=4 SV=1	1.51589	1.66534	0.329465	0.105114
Q3ZWA5	cbdbA20	Uncharacterized protein OS=Dehalococcoides mccartyi (strain CBDB1) GN=cbdbA20 PE=4 SV=1	2.45638	2.45036	0.0969107	0.0819741
Q3ZY44	cbdbA1040	Metallo-beta-lactamase family protein OS=Dehalococcoides mccartyi (strain CBDB1) GN=cbdbA1040 PE=4 SV=1	1.48632	1.44161	0.0797408	0.046853	Genetic information processing
Q3ZVT2	cbdbA1543	Sensor histidine kinase OS=Dehalococcoides mccartyi (strain CBDB1) GN=rdhC PE=4 SV=1	Id.	1.28528		0.0732726
Q3ZY87	cbdbA1099	Uncharacterized protein OS=Dehalococcoides mccartyi (strain CBDB1) GN=cbdbA1099 PE=4 SV=1	2.32207	2.22788	0.213695	0.0707826
Q3ZZF1	cbdbA350	Putative ubiquinone/menaquinone biosynthesis methlytransferase UbiE OS=Dehalococcoides mccartyi (strain CBDB1) GN=cbdbA350 PE=4 SV=1	1.17007	1.45885	0.210391	0.234734	Metabolism of cofactors and vitamins
Q3ZYY9	cbdbA1422	Uncharacterized protein OS=Dehalococcoides mccartyi (strain CBDB1) GN=cbdbA1422 PE=4 SV=1	2.51756	2.58839	0.155379	0.0356464
Q3ZZM2	cbdbA441	50S ribosomal protein L23 OS=Dehalococcoides mccartyi (strain CBDB1) GN=rplW PE=3 SV=1	3.01456	2.79833	0.0685874	0.0287532	Translation
Q3ZX47	cbdbA649	Uncharacterized protein OS=Dehalococcoides mccartyi (strain CBDB1) GN=cbdbA649 PE=4 SV=1	1.18125	1.60546	0.22518	0.045023
Q3ZYK6	cbdbA1249	ATPase, AAA family OS=Dehalococcoides mccartyi (strain CBDB1) GN=cbdbA1249 PE=4 SV=1	0.878944	1.19163	0.189412	0.0105403	Genetic information processing
Q3ZWG7	cbdbA126	LemA family domain protein OS=Dehalococcoides mccartyi (strain CBDB1) GN=cbdbA126 PE=4 SV=1	1.5873	1.30663	0.0762448	0.0886964
Q3ZXZ4	cbdbA989	Sensor histidine kinase/response regulator OS=Dehalococcoides mccartyi (strain CBDB1) GN=cbdbA989 PE=4 SV=1	Id.	1.33577		0.0597868
Q3ZY83	cbdbA1104	Riboflavin synthase, alpha subunit OS=Dehalococcoides mccartyi (strain CBDB1) GN=ribE PE=4 SV=1	1.10333	1.54083	0.135281	0.255755	Metabolism of cofactors and vitamins
Q3ZY70	cbdbA1064	Uncharacterized protein OS=Dehalococcoides mccartyi (strain CBDB1) GN=cbdbA1064 PE=4 SV=1	0.803609	1.11284	0.0437388	0.103272
Q3ZX61	cbdbA632	Conserved domain protein OS=Dehalococcoides mccartyi (strain CBDB1) GN=cbdbA632 PE=4 SV=1	1.88619	1.64962	0.145271	0.122596	Poorly characterized
Q3ZYJ0	cbdbA1205	3-oxoacyl-acyl carrier protein reductase OS=Dehalococcoides mccartyi (strain CBDB1) GN=fabG PE=3 SV=1	1.49849	1.74922	0.164808	0.142329	Biosynthesis of other secondary metabolites; Lipid metabolism; Metabolism of cofactors and vitamins
Q3ZYL6	cbdbA1294	4-hydroxy-3-methylbut-2-enyl diphosphate reductase OS=Dehalococcoides mccartyi (strain CBDB1) GN=ispH PE=3 SV=1	1.17331	1.57363	0.0806293	0.124468	Metabolism of terpenoids and polyketides
Q3ZYU9	cbdbA1361	Heat-inducible transcription repressor HrcA OS=Dehalococcoides mccartyi (strain CBDB1) GN=hrcA PE=3 SV=1	Id.	1.77914		0.0316219	Transcription
Q3ZX15	cbdbA627	Putative ribulose-phosphate 3-epimerase OS=Dehalococcoides mccartyi (strain CBDB1) GN=cbdbA627 PE=4 SV=1	1.83465	1.78776	0.212912	0.0939935	Carbohydrate metabolism; Energy metabolism
Q3ZW55	cbdbA1685	Putative transcriptional regulator OS=Dehalococcoides mccartyi (strain CBDB1) GN=cbdbA1685 PE=4 SV=1	1.89973	2.16575	0.206393	0.0845627
Q3ZXR8	cbdbA877	NADH-quinone oxidoreductase subunit D OS=Dehalococcoides mccartyi (strain CBDB1) GN=nuoD PE=3 SV=1	1.72199	1.70387	0.139092	0.02641	Energy metabolism
Q3ZWQ9	cbdbA191	Formate dehydrogenase accessory protein OS=Dehalococcoides mccartyi (strain CBDB1) GN=fdhE PE=4 SV=1	1.18619	1.54303	0.312602	0.0654393	Genetic information processing
Q3ZX80	cbdbA668	Probable phosphoribosylglycinamide transformylase OS=Dehalococcoides mccartyi (strain CBDB1) GN=cbdbA668 PE=4 SV=1	1.60729	1.6051	0.12986	0.100383
Q3ZYI6	cbdbA1211	Transcription-repair-coupling factor OS=Dehalococcoides mccartyi (strain CBDB1) GN=mfd PE=3 SV=1	0.808127	1.31452	0.0180851	0.0506329	Replication and repair
Q3ZYE6	cbdbA1202	Uncharacterized protein OS=Dehalococcoides mccartyi (strain CBDB1) GN=cbdbA1202 PE=4 SV=1	1.52042	2.24258	0.302114	0.111561	Poorly characterized
Q3ZXM5	cbdbA871	Iron-sulfur cluster-binding protein OS=Dehalococcoides mccartyi (strain CBDB1) GN=cbdbA871 PE=4 SV=1	1.60842	1.73651	0.137053	0.0392279
Q3ZX42	cbdbA658	Carbon monoxide dehydrogenase nickel-insertion accessory protein OS=Dehalococcoides mccartyi (strain CBDB1) GN=acsF PE=4 SV=1	1.43546	1.71041	0.0966754	0.124206	Cellular processes and signaling
Q3ZXB6	cbdbA725	Translation initiation factor IF-3 OS=Dehalococcoides mccartyi (strain CBDB1) GN=infC PE=3 SV=1	1.73719	1.76477	0.263644	0.0721852	Translation
Q3ZWN4	cbdbA165	Phosphate import ATP-binding protein PstB OS=Dehalococcoides mccartyi (strain CBDB1) GN=pstB PE=3 SV=1	1.27474	1.67018	0.252704	0.136531	Membrane transport
Q3ZZC3	cbdbA319	Uridylate kinase OS=Dehalococcoides mccartyi (strain CBDB1) GN=pyrH PE=3 SV=1	1.76927	1.9053	0.127273	0.0842951	Nucleotide metabolism
Q3ZWP0	cbdbA158	DNA-binding response regulator OS=Dehalococcoides mccartyi (strain CBDB1) GN=cbdbA158 PE=4 SV=1	1.34792	1.73839	0.043569	0.0339829
Q3ZVS7	cbdbA1548	DNA-binding response regulator, LuxR family OS=Dehalococcoides mccartyi (strain CBDB1) GN=rdhD PE=4 SV=1	1.53857	1.74756	0.105397	0.106045
Q3ZZP5	cbdbA467	50S ribosomal protein L17 OS=Dehalococcoides mccartyi (strain CBDB1) GN=rplQ PE=3 SV=1	2.74422	2.80066	0.0593937	0.117592	Translation
Q3ZY75	cbdbA1112	Bifunctional protein PyrR OS=Dehalococcoides mccartyi (strain CBDB1) GN=pyrR PE=3 SV=1	1.82549	2.06531	0.147942	0.124075	Nucleotide metabolism; Transcription
Q3ZWE1	cbdbA74	2-C-methyl-D-erythritol 4-phosphate cytidylyltransferase OS=Dehalococcoides mccartyi (strain CBDB1) GN=ispD PE=3 SV=1	1.86702	1.7763	0.123822	0.00736169	Metabolism of terpenoids and polyketides
Q3ZX57	cbdbA637	Uncharacterized protein OS=Dehalococcoides mccartyi (strain CBDB1) GN=rdhF PE=4 SV=1	1.78781	1.75756	0.106727	0.0995989
Q3ZXQ9	cbdbA889	Endonuclease III OS=Dehalococcoides mccartyi (strain CBDB1) GN=nth PE=3 SV=1	Id.	1.3787		0.0781051	Replication and repair
Q3ZZJ4	cbdbA413	Putative fumarate hydratase, beta subunit OS=Dehalococcoides mccartyi (strain CBDB1) GN=cbdbA413 PE=4 SV=1	Id.	1.92268		0.00709609	Carbohydrate metabolism; Energy metabolism
Q3ZYW7	cbdbA1394	Peptidase, M16 family OS=Dehalococcoides mccartyi (strain CBDB1) GN=cbdbA1394 PE=3 SV=1	1.24778	1.60012	0.342417	0.148749
Q3ZXH8	cbdbA816	Putative translation factor Sua5 OS=Dehalococcoides mccartyi (strain CBDB1) GN=cbdbA816 PE=4 SV=1	1.90147	1.74827	0.084223	0.0667722	Translation
Q3ZYG1	cbdbA1182	Uncharacterized protein OS=Dehalococcoides mccartyi (strain CBDB1) GN=cbdbA1182 PE=4 SV=1	1.82401	1.70306	0.540783	0.173203
Q3ZZ34	cbdbA1475	Ferrous iron transport protein B OS=Dehalococcoides mccartyi (strain CBDB1) GN=feoB PE=4 SV=1	1.62668	1.37398	0.326258	0.07188	Membrane transport
Q3ZXL2	cbdbA832	Biotin-acetyl-CoA-carboxylase ligase OS=Dehalococcoides mccartyi (strain CBDB1) GN=birA PE=4 SV=1	1.38661	1.67573	0.175078	0.0279175	Metabolism of cofactors and vitamins; Transcription
Q3ZZ06	cbdbA1455	Putative reductive dehalogenase OS=Dehalococcoides mccartyi (strain CBDB1) GN=rdhA PE=4 SV=1	1.42348	1.30912	0.0514616	0.0289572
Q3ZZ19	cbdbA1440	Uncharacterized protein OS=Dehalococcoides mccartyi (strain CBDB1) GN=cbdbA1440 PE=4 SV=1	2.31173	1.3764	0.250128	0.354107
Q3ZXM9	cbdbA867	Uncharacterized protein OS=Dehalococcoides mccartyi (strain CBDB1) GN=cbdbA867 PE=4 SV=1	1.91987	1.86197	0.0879073	0.0247233	Poorly characterized
Q3ZZL9	cbdbA444	50S ribosomal protein L22 OS=Dehalococcoides mccartyi (strain CBDB1) GN=rplV PE=3 SV=1	2.84647	2.72657	0.122214	0.244643	Translation
Q3ZW20	cbdbA1608	Sensor histidine kinase/response regulator OS=Dehalococcoides mccartyi (strain CBDB1) GN=cbdbA1608 PE=4 SV=1	1.40597	1.29874	0.169366	0.13686
Q3ZW64	cbdbA1673	Uncharacterized protein OS=Dehalococcoides mccartyi (strain CBDB1) GN=cbdbA1673 PE=4 SV=1	Id.	1.44416		0.245514	Poorly characterized
Q3ZWF8	cbdbA81	Uncharacterized protein OS=Dehalococcoides mccartyi (strain CBDB1) GN=rdhF PE=4 SV=1	2.10173	1.59834	0.0368788	0.127922
Q3ZW89	cbdbA2	GTPase Obg OS=Dehalococcoides mccartyi (strain CBDB1) GN=obg PE=3 SV=1	1.722	1.49351	0.343982	0.029493	Translation
Q3ZWI7	cbdbA101	Uncharacterized protein OS=Dehalococcoides mccartyi (strain CBDB1) GN=cbdbA101 PE=4 SV=1	1.26733	1.39185	0.349796	0.170693
Q3ZVY7	cbdbA1588	Putative reductive dehalogenase OS=Dehalococcoides mccartyi (strain CBDB1) GN=rdhA PE=4 SV=1	n.d.	1.23416		0.199407
Q3ZZR6	cbdbA505	HAD-superfamily hydrolase, subfamily IA OS=Dehalococcoides mccartyi (strain CBDB1) GN=cbdbA505 PE=4 SV=1	Id.	1.81516		0.0222641	Poorly characterized
Q3ZWC6	cbdbA60	DNA polymerase III delta subunit-related protein OS=Dehalococcoides mccartyi (strain CBDB1) GN=holA PE=4 SV=1	1.04552	1.15291	0.229756	0.120425	Nucleotide metabolism; Replication and repair
Q3ZXS5	cbdbA918	Uncharacterized protein OS=Dehalococcoides mccartyi (strain CBDB1) GN=cbdbA918 PE=4 SV=1	1.63453	1.81307	0.0188282	0.116165	Transcription
Q3ZZV2	cbdbA522	HDIG domain protein OS=Dehalococcoides mccartyi (strain CBDB1) GN=cbdbA522 PE=4 SV=1	Id.	1.53667		0.212189
Q3ZZA1	cbdbA286	Transcriptional repressor NrdR OS=Dehalococcoides mccartyi (strain CBDB1) GN=nrdR PE=3 SV=1	1.4412	1.6571	0.000536466	0.0892131	Transcription
Q3ZW53	cbdbA1688	Putative membrane bound regulatory protein,CprC OS=Dehalococcoides mccartyi (strain CBDB1) GN=cbdbA1688 PE=4 SV=1	2.53804	2.37067	0.054441	0.341478
Q3ZYM6	cbdbA1282	Aspartyl/glutamyl-tRNA(Asn/Gln) amidotransferase subunit C OS=Dehalococcoides mccartyi (strain CBDB1) GN=gatC PE=3 SV=1	2.4156	2.21055	0.0843497	0.0270926	Translation
Q3ZWW5	cbdbA541	UPF0109 protein cbdbA541 OS=Dehalococcoides mccartyi (strain CBDB1) GN=cbdbA541 PE=3 SV=1	2.79501	2.8044	0.457805	0.0807935	Poorly characterized
Q3ZXT2	cbdbA908	Copper-translocating P-type ATPase OS=Dehalococcoides mccartyi (strain CBDB1) GN=cbdbA908 PE=3 SV=1	1.26427	0.853717	0.245001	0.456843	Drug resistance; Signal transduction
Q3ZWN1	cbdbA169	Putative [Fe] hydrogenase, HymA subunit OS=Dehalococcoides mccartyi (strain CBDB1) GN=hymA PE=4 SV=1	2.20155	2.07235	0.197107	0.100065	Energy metabolism
Q3ZX67	cbdbA683	Putative [Fe] hydrogenase, HymA subunit OS=Dehalococcoides mccartyi (strain CBDB1) GN=hymA PE=4 SV=1	2.45755	2.22614	0.177646	0.211523	Energy metabolism
Q3ZYL2	cbdbA1241	Fasciclin domain protein OS=Dehalococcoides mccartyi (strain CBDB1) GN=cbdbA1241 PE=4 SV=1	1.91543	2.09756	0.0931875	0.0562935
Q3ZX25	cbdbA612	Sensor histidine kinase OS=Dehalococcoides mccartyi (strain CBDB1) GN=cbdbA612 PE=4 SV=1	n.d.	1.07448		0.139818
Q3ZWI5	cbdbA103	Uncharacterized protein OS=Dehalococcoides mccartyi (strain CBDB1) GN=cbdbA103 PE=4 SV=1	Id.	1.23889		0.263925
Q3ZWA2	cbdbA26	Uncharacterized protein OS=Dehalococcoides mccartyi (strain CBDB1) GN=cbdbA26 PE=4 SV=1	1.14705	1.49852	0.257019	0.168109
Q3ZZD7	cbdbA365	Putative deoxycytidylate deaminase OS=Dehalococcoides mccartyi (strain CBDB1) GN=cbdbA365 PE=4 SV=1	1.94519	2.14709	0.304588	0.173148	Membrane transport; Nucleotide metabolism
Q3ZX60	cbdbA633	ABC-type cobalamin/Fe3+-siderophores transport system, periplasmic component OS=Dehalococcoides mccartyi (strain CBDB1) GN=fecB PE=4 SV=1	2.50619	2.42977	0.00583693	0.110662	Membrane transport
Q3ZYL1	cbdbA1244	Uncharacterized protein OS=Dehalococcoides mccartyi (strain CBDB1) GN=cbdbA1244 PE=4 SV=1	1.35667	1.6055	0.049434	0.22357
Q3ZX49	cbdbA646	Sensor histidine kinase OS=Dehalococcoides mccartyi (strain CBDB1) GN=cbdbA646 PE=4 SV=1	1.60247	1.54714	0.0680702	0.0918191
Q3ZXT6	cbdbA904	CBS domain protein OS=Dehalococcoides mccartyi (strain CBDB1) GN=cbdbA904 PE=4 SV=1	2.5492	2.50963	0.0707535	0.0207108
Q3ZXX1	cbdbA963	Glycosyl transferase, group 1 family protein OS=Dehalococcoides mccartyi (strain CBDB1) GN=cbdbA963 PE=4 SV=1	1.36441	1.377	0.0490371	0.0747691	Metabolism
Q3ZZS0	cbdbA499	Glucose-1-phosphate thymidylyltransferase OS=Dehalococcoides mccartyi (strain CBDB1) GN=rfbA PE=4 SV=1	1.65537	1.83294	0.0246762	0.0642508	Carbohydrate metabolism
Q3ZWN9	cbdbA159	Sensor histidine kinase OS=Dehalococcoides mccartyi (strain CBDB1) GN=cbdbA159 PE=4 SV=1	1.34234	1.20783	0.145078	0.142595	Enzyme families; Signal transduction
Q3ZW10	cbdbA1619	Transcriptional regulator, MarR family OS=Dehalococcoides mccartyi (strain CBDB1) GN=rdhR PE=4 SV=1	Id.	1.21842		0.11755
Q3ZYP0	cbdbA1320	Uncharacterized protein OS=Dehalococcoides mccartyi (strain CBDB1) GN=cbdbA1320 PE=4 SV=1	2.82449	2.66621	0.0231356	0.0893406
Q3ZVU9	cbdbA1576	Transcriptional regulator, MarR family OS=Dehalococcoides mccartyi (strain CBDB1) GN=rdhR PE=4 SV=1	2.17517	2.1185	0.216134	0.10122
Q3ZYZ8	cbdbA1412	Excisionase family DNA binding protein OS=Dehalococcoides mccartyi (strain CBDB1) GN=cbdbA1412 PE=4 SV=1	2.595	2.40124	0.0258953	0.090217
Q3ZW48	cbdbA1694	Twin-arginine translocation protein, TatA OS=Dehalococcoides mccartyi (strain CBDB1) GN=E PE=4 SV=1	1.85849	1.76683	0.448198	0.140177	Folding, sorting and degradation; Membrane transport
Q3ZZL6	cbdbA447	50S ribosomal protein L29 OS=Dehalococcoides mccartyi (strain CBDB1) GN=rpmC PE=3 SV=1	1.95005	2.39051	0.214103	0.0576547	Translation
Q3ZXM4	cbdbA845	Hydrogenase subunit HymA OS=Dehalococcoides mccartyi (strain CBDB1) GN=cbdbA845 PE=4 SV=1	1.26281	1.63717	0.402229	0.462188	Energy metabolism
Q3ZWY6	cbdbA543	Peptide chain release factor 2 OS=Dehalococcoides mccartyi (strain CBDB1) GN=prfB PE=4 SV=1	1.47652	1.55711	0.0684719	0.0725308	Translation
Q3ZYN7	cbdbA1268	Dephospho-CoA kinase OS=Dehalococcoides mccartyi (strain CBDB1) GN=coaE PE=3 SV=1	1.11485	1.43338	0.177683	0.0975307	Metabolism of cofactors and vitamins
Q3ZYN4	cbdbA1271	50S ribosomal protein L27 OS=Dehalococcoides mccartyi (strain CBDB1) GN=rpmA PE=3 SV=1	2.94158	2.70159	0.116124	0.0246807	Translation
Q3ZWN2	cbdbA168	Arsenate reductase OS=Dehalococcoides mccartyi (strain CBDB1) GN=arsC PE=4 SV=1	1.83282	1.74742	0.246185	0.144395	Metabolism
Q3ZYL4	cbdbA1239	Universal stress protein family OS=Dehalococcoides mccartyi (strain CBDB1) GN=cbdbA1239 PE=4 SV=1	1.68497	2.28325	1.49334	0.0534063
Q3ZZ10	cbdbA1451	Tryptophan synthase alpha chain OS=Dehalococcoides mccartyi (strain CBDB1) GN=trpA PE=3 SV=1	2.43412	2.33493	0.124467	0.0396526	Amino acid metabolism
Q3ZWL8	cbdbA184	DNA-binding response regulator OS=Dehalococcoides mccartyi (strain CBDB1) GN=rdhD PE=4 SV=1	Id.	1.492		0.444834	Cellular community - prokaryotes; Signal transduction
Q3ZZM0	cbdbA443	30S ribosomal protein S19 OS=Dehalococcoides mccartyi (strain CBDB1) GN=rpsS PE=3 SV=1	2.83168	2.69244	0.0959977	0.0522195	Translation
Q3ZZM5	cbdbA438	30S ribosomal protein S10 OS=Dehalococcoides mccartyi (strain CBDB1) GN=rpsJ PE=3 SV=1	3.33275	3.2516	0.0221177	0.0479264	Translation
Q3ZWU4	cbdbA271	Cation efflux family protein OS=Dehalococcoides mccartyi (strain CBDB1) GN=cbdbA271 PE=4 SV=1	1.41012	1.62099	0.258634	0.0397012
Q3ZZX2	cbdbA1727	Radical SAM domain protein OS=Dehalococcoides mccartyi (strain CBDB1) GN=cbdbA1727 PE=4 SV=1	1.22991	1.40448	0.109881	0.079862
Q3ZX52	cbdbA643	Alpha-ribazole-5-phosphate phosphatase OS=Dehalococcoides mccartyi (strain CBDB1) GN=cobC PE=4 SV=1	1.09835	1.51287	0.453122	0.187327	Metabolism of cofactors and vitamins
Q3ZWQ5	cbdbA197	Phosphopantetheine adenylyltransferase OS=Dehalococcoides mccartyi (strain CBDB1) GN=coaD PE=3 SV=1	n.d.	1.74934		0.139023	Metabolism of cofactors and vitamins
Q3ZY66	cbdbA1070	Carbon-nitrogen hydrolase family protein OS=Dehalococcoides mccartyi (strain CBDB1) GN=cbdbA1070 PE=4 SV=1	1.72606	1.82977	0.0789585	0.0387863
Q3ZWU5	cbdbA270	Histone deacetylase family protein OS=Dehalococcoides mccartyi (strain CBDB1) GN=cbdbA270 PE=4 SV=1	1.33966	1.67909	0.134897	0.0895419
Q3ZXR6	cbdbA880	Proton-translocating NADH-quinone oxidoreductase, I subunit OS=Dehalococcoides mccartyi (strain CBDB1) GN=cbdbA880 PE=4 SV=1	1.44924	1.50476	0.0760523	0.130625	Energy metabolism
Q3ZX13	cbdbA570	Uncharacterized protein OS=Dehalococcoides mccartyi (strain CBDB1) GN=cbdbA570 PE=4 SV=1	1.36573	1.64	0.279408	0.0674538
Q3ZWA3	cbdbA24	Transcriptional regulator, Fur family OS=Dehalococcoides mccartyi (strain CBDB1) GN=cbdbA24 PE=4 SV=1	2.02656	1.86063	0.145586	0.0765641	Transcription
Q3ZYK2	cbdbA1254	Radical SAM domain protein OS=Dehalococcoides mccartyi (strain CBDB1) GN=cbdbA1254 PE=4 SV=1	1.32168	1.65602	0.340343	0.0839237	Genetic information processing
Q3ZYL5	cbdbA1295	Putative tagatose 1,6-diphosphate aldolase OS=Dehalococcoides mccartyi (strain CBDB1) GN=cbdbA1295 PE=4 SV=1	1.35912	1.30122	0.263572	0.0880697	Carbohydrate metabolism; Cellular community - prokaryotes
Q3ZWZ3	cbdbA595	Histone acetyltransferase, ELP3 family OS=Dehalococcoides mccartyi (strain CBDB1) GN=cbdbA595 PE=4 SV=1	1.27848	1.06888	0.0631367	0.232923	Replication and repair; Translation
Q3ZZR4	cbdbA509	DNA polymerase III, delta prime subunit OS=Dehalococcoides mccartyi (strain CBDB1) GN=holB PE=4 SV=1	1.25407	1.41919	0.0773534	0.123631	Nucleotide metabolism; Replication and repair
Q3ZXT5	cbdbA905	Conserved domain protein OS=Dehalococcoides mccartyi (strain CBDB1) GN=cbdbA905 PE=4 SV=1	1.40829	1.6368	0.0545412	0.0813665
Q3ZWL6	cbdbA128	Putative Ni/Fe hydrogenase maturation protease OS=Dehalococcoides mccartyi (strain CBDB1) GN=hoxM PE=4 SV=1	n.d.	1.31479		0.0721243	Enzyme families
Q3ZWI8	cbdbA100.1	Uncharacterized protein OS=Dehalococcoides mccartyi (strain CBDB1) GN=cbdbA100.1 PE=4 SV=1	n.d.	1.19411		0.24414
Q3ZYN2	cbdbA1275	Putative membrane protein OS=Dehalococcoides mccartyi (strain CBDB1) GN=cbdbA1275 PE=4 SV=1	1.45672	1.44988	0.112069	0.041368
Q3ZZE0	cbdbA362	ABC transporter, ATP-binding protein OS=Dehalococcoides mccartyi (strain CBDB1) GN=nodI PE=3 SV=1	1.52023	1.53145	0.0561739	0.269588	Membrane transport
Q3ZX58	cbdbA636	ABC-type cobalamin/Fe3+-siderophores transport system, ATPase component OS=Dehalococcoides mccartyi (strain CBDB1) GN=fepC PE=4 SV=1	1.35815	1.69087	0.0883884	0.0402935	Membrane transport
Q3ZY36	cbdbA1049	Glutamine-dependent NAD(+) synthetase OS=Dehalococcoides mccartyi (strain CBDB1) GN=nadE PE=3 SV=1	Id.	1.65783		0.224366	Metabolism of cofactors and vitamins
Q3ZXM0	cbdbA823	Phosphoribosylaminoimidazole-succinocarboxamide synthase OS=Dehalococcoides mccartyi (strain CBDB1) GN=purC PE=3 SV=1	Id.	1.50818		0.294921	Nucleotide metabolism
Q3ZXK1	cbdbA844	Hydrogenase, group 4, EchC subunit OS=Dehalococcoides mccartyi (strain CBDB1) GN=echC PE=4 SV=1	2.20223	2.14966	0.124197	0.0760077
Q3ZY50	cbdbA1060	Imidazole glycerol phosphate synthase subunit HisH OS=Dehalococcoides mccartyi (strain CBDB1) GN=hisH PE=3 SV=1	1.91863	1.81116	0.0781141	0.105504	Amino acid metabolism
Q3ZX51	cbdbA644	Cobinamide kinase OS=Dehalococcoides mccartyi (strain CBDB1) GN=cobU PE=4 SV=1	1.12572	1.66008	0.110051	0.11676	Metabolism of cofactors and vitamins
Q3ZZ41	cbdbA1466	Transcriptional regulator, MarR family OS=Dehalococcoides mccartyi (strain CBDB1) GN=cbdbA1466 PE=4 SV=1	1.70849	1.68656	0.0115641	0.0767064
Q3ZYP2	cbdbA1318	Uncharacterized protein OS=Dehalococcoides mccartyi (strain CBDB1) GN=cbdbA1318 PE=4 SV=1	Id.	1.84899		0.612202
Q3ZWU3	cbdbA273	Protein-export membrane protein SecF OS=Dehalococcoides mccartyi (strain CBDB1) GN=secF PE=3 SV=1	1.89954	2.00708	0.354501	0.107659	Folding, sorting and degradation; Membrane transport
Q3ZZH1	cbdbA381	Type III pantothenate kinase OS=Dehalococcoides mccartyi (strain CBDB1) GN=coaX PE=3 SV=1	1.50186	1.94102	0.0191671	0.115478	Metabolism of cofactors and vitamins
Q3ZZ91	cbdbA298	Uncharacterized protein OS=Dehalococcoides mccartyi (strain CBDB1) GN=cbdbA298 PE=4 SV=1	1.74932	1.49942	0.084546	0.0692459	Poorly characterized
Q3ZWC0	cbdbA69	Alcohol dehydrogenase, iron-containing OS=Dehalococcoides mccartyi (strain CBDB1) GN=cbdbA69 PE=4 SV=1	Id.	1.56648		0.0209409	Metabolism
Q3ZWY8	cbdbB15	30S ribosomal protein S16 OS=Dehalococcoides mccartyi (strain CBDB1) GN=rpsP PE=3 SV=1	2.61784	1.7591	0.0853816	0.0922257	Translation
Q3ZWY3	cbdbA547	ABC-type dipeptide/oligopeptide/nickel transport system, periplasmic component OS=Dehalococcoides mccartyi (strain CBDB1) GN=cbdbA547 PE=4 SV=1	1.72639	1.82431	0.0879226	0.0201941	Cellular community - prokaryotes; Drug resistance; Membrane transport
Q3ZXP3	cbdbA851	Hydrogenase, EchF subunit OS=Dehalococcoides mccartyi (strain CBDB1) GN=cbdbA851 PE=4 SV=1	2.0562	2.19614	0.334875	0.0339764
Q3ZZV5	cbdbA519	Activator of 2-hydroxyglutaryl-CoA dehydratase OS=Dehalococcoides mccartyi (strain CBDB1) GN=cbdbA519 PE=4 SV=1	1.62956	1.46339	0.0435726	0.0358799
Q3ZZL5	cbdbA448	30S ribosomal protein S17 OS=Dehalococcoides mccartyi (strain CBDB1) GN=rpsQ PE=3 SV=1	2.6976	2.76224	0.0447429	0.0391019	Translation
Q3ZVV4	cbdbA1571	Transcriptional regulator, MarR family OS=Dehalococcoides mccartyi (strain CBDB1) GN=rdhR PE=4 SV=1	0.970486	1.70136	0.149084	0.330665
Q3ZWY1	cbdbA553	Aminotransferase, classes I and II OS=Dehalococcoides mccartyi (strain CBDB1) GN=cbdbA553 PE=4 SV=1	n.d.	1.28683		0.030791
Q3ZWG1	cbdbA79	Sensor histidine kinase OS=Dehalococcoides mccartyi (strain CBDB1) GN=rdhC PE=4 SV=1	1.30569	1.17095	0.332723	0.152596
Q3ZY61	cbdbA1075	DNA-binding response regulator, LuxR family OS=Dehalococcoides mccartyi (strain CBDB1) GN=cbdbA1075 PE=4 SV=1	Id.	1.86056		0.025156
Q3ZZH6	cbdbA374	Putative magnesium and cobalt transport protein OS=Dehalococcoides mccartyi (strain CBDB1) GN=corA PE=4 SV=1	2.0467	1.89897	0.129571	0.548659	Membrane transport
Q3ZZA5	cbdbA280	Protein MraZ OS=Dehalococcoides mccartyi (strain CBDB1) GN=mraZ PE=3 SV=1	1.75018	2.09835	0.179294	0.0642396	Poorly characterized
Q3ZYN6	cbdbA1269	Uncharacterized protein OS=Dehalococcoides mccartyi (strain CBDB1) GN=cbdbA1269 PE=4 SV=1	Id.	1.17512		0.0419012	Energy metabolism; Energy metabolism
Q3ZXP1	cbdbA854	Elongation factor P OS=Dehalococcoides mccartyi (strain CBDB1) GN=efp PE=3 SV=1	2.25939	2.18113	0.0968875	0.137788	Translation
Q3ZW61	cbdbA1678	Serine acetyltransferase OS=Dehalococcoides mccartyi (strain CBDB1) GN=cysE PE=3 SV=1	1.66487	1.47897	0.231306	0.444209	Amino acid metabolism; Cellular community - prokaryotes; Energy metabolism
Q3ZVT1	cbdbA1544	DNA-binding response regulator OS=Dehalococcoides mccartyi (strain CBDB1) GN=rdhD PE=4 SV=1	Id.	1.84855		0.171156	Cellular community - prokaryotes; Signal transduction
Q3ZZQ6	cbdbA456	50S ribosomal protein L30 OS=Dehalococcoides mccartyi (strain CBDB1) GN=rpmD PE=3 SV=1	2.85964	2.61992	0.0913969	0.0582961	Translation
Q3ZXT3	cbdbA907	Uncharacterized protein OS=Dehalococcoides mccartyi (strain CBDB1) GN=cbdbA907 PE=4 SV=1	Id.	2.03739		0.026656	Poorly characterized
Q3ZZQ1	cbdbA461	Translation initiation factor IF-1 OS=Dehalococcoides mccartyi (strain CBDB1) GN=infA PE=3 SV=1	2.13368	2.31695	0.00551357	0.115474	Translation
Q3ZZQ4	cbdbA458	Protein translocase subunit SecY OS=Dehalococcoides mccartyi (strain CBDB1) GN=secY PE=3 SV=1	1.96667	2.06715	0.195941	0.212854	Cellular community - prokaryotes; Folding, sorting and degradation; Membrane transport
Q3ZWN8	cbdbA160	Methylglyoxal synthase OS=Dehalococcoides mccartyi (strain CBDB1) GN=mgsA PE=3 SV=1	1.72756	1.42874	0.165379	0.164547	Carbohydrate metabolism
Q3ZX81	cbdbA667	Carbohydrate kinase, PfkB family OS=Dehalococcoides mccartyi (strain CBDB1) GN=cbdbA667 PE=4 SV=1	1.32135	1.37705	0.0891798	0.0637185	Carbohydrate metabolism
Q3ZYQ2	cbdbA1307	Uncharacterized protein OS=Dehalococcoides mccartyi (strain CBDB1) GN=cbdbA1307 PE=4 SV=1	1.64822	1.60355	0.147939	0.0123645
Q3ZZC8	cbdbA313	Putative membrane-associated zinc metalloprotease OS=Dehalococcoides mccartyi (strain CBDB1) GN=cbdbA313 PE=4 SV=1	n.d.	1.48463		0.138036	Cell growth and death; Cellular community - prokaryotes; Enzyme families
Q3ZZ33	cbdbA1477	Iron(II) transport protein A OS=Dehalococcoides mccartyi (strain CBDB1) GN=feoA PE=4 SV=1	1.98345	1.89475	0.207453	0.18222	Membrane transport
Q3ZY95	cbdbA1091	Transcriptional regulator, MarR family OS=Dehalococcoides mccartyi (strain CBDB1) GN=rdhR PE=4 SV=1	1.83241	1.84837	0.245821	0.074053
Q3ZXD1	cbdbA762	Metallo-beta-lactamase family protein OS=Dehalococcoides mccartyi (strain CBDB1) GN=cbdbA762 PE=4 SV=1	1.032	1.63986	0.294597	0.193969
Q3ZW11	cbdbA1618	Putative reductive dehalogenase OS=Dehalococcoides mccartyi (strain CBDB1) GN=rdhA PE=4 SV=1	1.54685	1.2474	0.198246	0.135033
Q3ZYR7	cbdbA1344	Formamidopyrimidine-DNA glycosylase OS=Dehalococcoides mccartyi (strain CBDB1) GN=mutM PE=4 SV=1	n.d.	1.22498		0.0283216	Replication and repair
Q3ZWJ6	cbdbA153	Putative response regulator OS=Dehalococcoides mccartyi (strain CBDB1) GN=cbdbA153 PE=4 SV=1	1.61114	1.52323	0.49744	0.283825
Q3ZZD6	cbdbA367	Uncharacterized protein OS=Dehalococcoides mccartyi (strain CBDB1) GN=cbdbA367 PE=4 SV=1	0.793775	1.23901	0.321991	0.266932
Q3ZY43	cbdbA1041	DNA-binding response regulator, LuxR family OS=Dehalococcoides mccartyi (strain CBDB1) GN=cbdbA1041 PE=4 SV=1	1.73885	1.81963	0.0607994	0.0154665
Q3ZY26	cbdbA1033	Sensor histidine kinase OS=Dehalococcoides mccartyi (strain CBDB1) GN=cbdbA1033 PE=4 SV=1	2.36555	1.81211	0.224647	0.0330242	Enzyme families; Signal transduction
Q3ZXX4	cbdbA959.1	50S ribosomal protein L33 OS=Dehalococcoides mccartyi (strain CBDB1) GN=rpmG PE=3 SV=1	2.89691	2.80962	0.130759	0.0835849	Translation
Q3ZXA9	cbdbA733	Peptide deformylase OS=Dehalococcoides mccartyi (strain CBDB1) GN=def PE=3 SV=1	2.01347	1.85401	0.219912	0.144065	Metabolism
Q3ZZS1	cbdbA497	Phosphomannomutase OS=Dehalococcoides mccartyi (strain CBDB1) GN=pmmB PE=3 SV=1	1.36629	1.38793	0.102429	0.115049	Carbohydrate metabolism
Q3ZY51	cbdbA1087	ABC transporter, ATP-binding/permease protein OS=Dehalococcoides mccartyi (strain CBDB1) GN=cbdbA1087 PE=3 SV=1	1.54057	1.24234	0.0137305	0.0384747	Membrane transport
Q3ZYH6	cbdbA1229	Probable competence-damage inducible protein CinA OS=Dehalococcoides mccartyi (strain CBDB1) GN=cbdbA1229 PE=4 SV=1	1.29214	1.60623	0.924004	0.201611
Q3ZX55	cbdbA639	Putative threonine-phosphate decarboxylase (L-threonine-O-3-phosphate decarboxylase) OS=Dehalococcoides mccartyi (strain CBDB1) GN=cobD PE=3 SV=1	1.03582	1.61005	0.0795912	0.0794715
Q3ZZ14	cbdbA1445	Indole-3-glycerol phosphate synthase OS=Dehalococcoides mccartyi (strain CBDB1) GN=trpC PE=3 SV=1	1.55935	1.57161	0.305175	0.122204	Amino acid metabolism
Q3ZZX9	cbdbA1717	Uncharacterized protein OS=Dehalococcoides mccartyi (strain CBDB1) GN=cbdbA1717 PE=4 SV=1	2.34663	2.23517	0.127059	0.0260532
Q3ZYI8	cbdbA1208	Acyl carrier protein OS=Dehalococcoides mccartyi (strain CBDB1) GN=acpP PE=3 SV=1	3.36741	2.98747	0.215203	0.0533192	Lipid metabolism
Q3ZWT1	cbdbA230	Uncharacterized protein OS=Dehalococcoides mccartyi (strain CBDB1) GN=cbdbA230 PE=4 SV=1	1.47724	1.51522	0.430926	0.195591
Q3ZYN8	cbdbA1266	Uncharacterized protein OS=Dehalococcoides mccartyi (strain CBDB1) GN=cbdbA1266 PE=4 SV=1	1.71158	1.56947	0.449436	0.278016
Q3ZW04	cbdbA1625	Transcriptional regulator, MarR family OS=Dehalococcoides mccartyi (strain CBDB1) GN=rdhR PE=4 SV=1	0.84589	1.79318	0.085812	0.0843984
Q3ZYZ1	cbdbA1420	Uncharacterized protein OS=Dehalococcoides mccartyi (strain CBDB1) GN=cbdbA1420 PE=4 SV=1	n.d.	1.01232		0.175848	Poorly characterized
Q3ZWV4	cbdbA260	Uncharacterized protein OS=Dehalococcoides mccartyi (strain CBDB1) GN=cbdbA260 PE=4 SV=1	1.35592	1.41529	0.18577	0.102013
Q3ZW83	cbdbA1701	Regulatory protein RecX OS=Dehalococcoides mccartyi (strain CBDB1) GN=recX PE=3 SV=1	Id.	1.36716		0.0705695	Replication and repair
Q3ZZ16	cbdbA1442	Anthranilate synthase component II OS=Dehalococcoides mccartyi (strain CBDB1) GN=trpG PE=4 SV=1	1.6925	Id.	0.0287408		Amino acid metabolism; Biosynthesis of other secondary metabolites; Cellular community - prokaryotes
Q3ZXB7	cbdbA724	50S ribosomal protein L35 OS=Dehalococcoides mccartyi (strain CBDB1) GN=rpmI PE=3 SV=1	3.03847	2.90581	0.0702603	0.102783	Translation
Q3ZXT7	cbdbA903	Indolepyruvate ferredoxin oxidoreductase, beta subunit OS=Dehalococcoides mccartyi (strain CBDB1) GN=iorB PE=4 SV=1	1.16515	1.88614	0.276651	0.0864427	Metabolism
Q3ZWQ6	cbdbA196	Putative methyltransferase OS=Dehalococcoides mccartyi (strain CBDB1) GN=cbdbA196 PE=4 SV=1	1.6241	1.66552	0.197139	0.104656
Q3ZXA6	cbdbA687	Mercuric reductase OS=Dehalococcoides mccartyi (strain CBDB1) GN=cbdbA687 PE=4 SV=1	1.46842	1.36233	0.215596	0.106639
Q3ZXB0	cbdbA732	2,3-diketo-5-methylthio-1-phosphopentanephosphatase family protein OS=Dehalococcoides mccartyi (strain CBDB1) GN=cbdbA732 PE=4 SV=1	1.60238	1.59518	0.46786	0.023617
Q3ZXN2	cbdbA863	Uncharacterized protein OS=Dehalococcoides mccartyi (strain CBDB1) GN=cbdbA863 PE=4 SV=1	2.15368	2.07818	0.16833	0.0899411
Q3ZWC4	cbdbA63	Transcriptional repressor, ROK family OS=Dehalococcoides mccartyi (strain CBDB1) GN=cbdbA63 PE=4 SV=1	1.39801	1.44649	0.0822436	0.0686955	Biosynthesis of other secondary metabolites; Carbohydrate metabolism
Q3ZZX8	cbdbA1718	Uncharacterized protein OS=Dehalococcoides mccartyi (strain CBDB1) GN=cbdbA1718 PE=4 SV=1	1.83965	2.141	0.14603	0.0748796
Q3ZWZ8	cbdbA589	Uncharacterized protein OS=Dehalococcoides mccartyi (strain CBDB1) GN=cbdbA589 PE=4 SV=1	1.84061	1.62389	0.0435686	0.118372	Translation
Q3ZW66	cbdbA1670	Conserved domain protein OS=Dehalococcoides mccartyi (strain CBDB1) GN=cbdbA1670 PE=4 SV=1	1.61635	1.65864	0.0836677	0.166106
Q3ZVS8	cbdbA1547	Sensor histidine kinase OS=Dehalococcoides mccartyi (strain CBDB1) GN=rdhC PE=4 SV=1	n.d.	1.01165		0.148258
Q3ZZ46	cbdbA1509	Transcriptional regulator, MarR family OS=Dehalococcoides mccartyi (strain CBDB1) GN=rdhR PE=4 SV=1	Id.	1.76463		0.171665
Q3ZWQ0	cbdbA203	Uncharacterized protein OS=Dehalococcoides mccartyi (strain CBDB1) GN=cbdbA203 PE=4 SV=1	Id.	1.47212		0.35051	Poorly characterized
Q3ZVU2	cbdbA1534	Transcriptional regulator, MarR family,probable OS=Dehalococcoides mccartyi (strain CBDB1) GN=rdhR PE=4 SV=1	1.58636	1.83323	0.138679	0.0786287
Q3ZX10	cbdbA574	Uncharacterized protein OS=Dehalococcoides mccartyi (strain CBDB1) GN=cbdbA574 PE=4 SV=1	1.33186	1.29839	0.0528951	0.0566478	Poorly characterized
Q3ZWT7	cbdbA222	Serine protease inhibitor family protein OS=Dehalococcoides mccartyi (strain CBDB1) GN=cbdbA222 PE=3 SV=1	1.56944	1.52037	0.0618942	0.0661694
Q3ZXN0	cbdbA865	Uncharacterized protein OS=Dehalococcoides mccartyi (strain CBDB1) GN=cbdbA865 PE=4 SV=1	2.02485	1.79789	0.121635	0.0503274
Q3ZXG5	cbdbA776	5'-nucleotidase SurE OS=Dehalococcoides mccartyi (strain CBDB1) GN=surE PE=3 SV=1	1.61614	1.79548	0.338265	0.117788	Metabolism of cofactors and vitamins; Nucleotide metabolism
Q3ZZ57	cbdbA1497	DNA-binding response regulator OS=Dehalococcoides mccartyi (strain CBDB1) GN=rdhD PE=4 SV=1	Id.	1.68454		0.0773127
Q3ZW37	cbdbA1647	Transcriptional regulator, MerR family OS=Dehalococcoides mccartyi (strain CBDB1) GN=cbdbA1647 PE=4 SV=1	1.43624	1.41138	0.00656935	0.335471
Q3ZXQ5	cbdbA893	Uncharacterized protein OS=Dehalococcoides mccartyi (strain CBDB1) GN=cbdbA893 PE=4 SV=1	1.96138	1.86535	0.110419	0.0808333
Q3ZZD4	cbdbA305	Carboxyl-terminal protease OS=Dehalococcoides mccartyi (strain CBDB1) GN=prc PE=3 SV=1	1.5254	1.72125	0.148945	0.182513	Enzyme families
Q3ZWG2	cbdbA78	DNA-binding response regulator OS=Dehalococcoides mccartyi (strain CBDB1) GN=rdhD PE=4 SV=1	n.d.	1.40444		0.0787768	Cellular community - prokaryotes; Signal transduction
Q3ZWJ4	cbdbA155	Putative alanine dehydrogenase OS=Dehalococcoides mccartyi (strain CBDB1) GN=arcB PE=3 SV=1	Id.	1.65462		0.558209	Amino acid metabolism; Metabolism of other amino acids
Q3ZW31	cbdbA1653	Hydrogenase, group 4, HycE subunit OS=Dehalococcoides mccartyi (strain CBDB1) GN=hycE PE=4 SV=1	n.d.	1.46341		0.14128
Q3ZZR7	cbdbA504	Putative phosphatidylethanolamine-binding protein OS=Dehalococcoides mccartyi (strain CBDB1) GN=cbdbA504 PE=4 SV=1	1.03553	1.51866	0.520422	0.029806	Poorly characterized
Q3ZXJ4	cbdbA796	Thymidylate synthase OS=Dehalococcoides mccartyi (strain CBDB1) GN=thyA PE=4 SV=1	1.31329	1.91297	0.506983	0.125557	Drug resistance; Metabolism of cofactors and vitamins; Nucleotide metabolism
Q3ZXU4	cbdbA946	Ribosome-binding factor A OS=Dehalococcoides mccartyi (strain CBDB1) GN=rbfA PE=3 SV=1	2.16734	2.2555	0.0942117	0.0563443	Translation
Q3ZXK6	cbdbA839	ABC transporter, ATP-binding protein OS=Dehalococcoides mccartyi (strain CBDB1) GN=cbdbA839 PE=4 SV=1	1.06509	1.42985	0.577251	0.10336	Membrane transport
Q3ZYE4	cbdbA1141	Cob(I)alamin adenosyltransferase OS=Dehalococcoides mccartyi (strain CBDB1) GN=cobA PE=4 SV=1	1.62803	1.6737	0.032442	0.151716	Metabolism of cofactors and vitamins
Q3ZZE3	cbdbA359	Conserved domain protein OS=Dehalococcoides mccartyi (strain CBDB1) GN=cbdbA359 PE=4 SV=1	2.20317	2.04925	0.0127168	0.0448268
Q3ZY74	cbdbA1088	Iron-sulfur cluster-binding protein OS=Dehalococcoides mccartyi (strain CBDB1) GN=cbdbA1088 PE=4 SV=1	1.39233	1.28377	0.214961	0.163667
Q3ZY62	cbdbA1074	Uncharacterized protein OS=Dehalococcoides mccartyi (strain CBDB1) GN=cbdbA1074 PE=4 SV=1	1.22668	1.44675	0.25175	0.115998
Q3ZY65	cbdbA1071	Glycosyl transferase OS=Dehalococcoides mccartyi (strain CBDB1) GN=cbdbA1071 PE=4 SV=1	1.85746	1.65527	0.0246938	0.0796448
Q3ZXH4	cbdbA766	Nuclease SbcD OS=Dehalococcoides mccartyi (strain CBDB1) GN=sbcD PE=4 SV=1	Id.	1.46473		0.145375	Replication and repair
Q3ZX23	cbdbA619	Cation ABC transporter, ATP-binding protein OS=Dehalococcoides mccartyi (strain CBDB1) GN=cbdbA619 PE=3 SV=1	1.39298	1.81906	0.103822	0.0182734	Membrane transport
Q3ZXK3	cbdbA842	Hydrogenase, EchA subunit OS=Dehalococcoides mccartyi (strain CBDB1) GN=echA PE=4 SV=1	n.d.	1.47577		0.0727781	Metabolism
Q3ZX37	cbdbA614	Uncharacterized protein OS=Dehalococcoides mccartyi (strain CBDB1) GN=cbdbA614 PE=4 SV=1	1.76605	1.84895	0.101867	0.285703
Q3ZXX0	cbdbA964	Uncharacterized protein OS=Dehalococcoides mccartyi (strain CBDB1) GN=cbdbA964 PE=4 SV=1	n.d.	1.18318		0.387835
Q3ZXE2	cbdbA748	Metallopeptidase, M50 family OS=Dehalococcoides mccartyi (strain CBDB1) GN=cbdbA748 PE=4 SV=1	1.47583	Id.	0.0706316
Q3ZZK6	cbdbA398	Holliday junction ATP-dependent DNA helicase RuvA OS=Dehalococcoides mccartyi (strain CBDB1) GN=ruvA PE=3 SV=1	1.83887	2.11439	0.175461	0.0191232	Replication and repair
Q3ZXU2	cbdbA948	Uncharacterized protein OS=Dehalococcoides mccartyi (strain CBDB1) GN=cbdbA948 PE=4 SV=1	2.11571	2.01874	0.293003	0.101877	Poorly characterized
Q3ZXJ3	cbdbA797	Uncharacterized protein OS=Dehalococcoides mccartyi (strain CBDB1) GN=cbdbA797 PE=4 SV=1	1.68758	1.81813	0.150094	0.0274428
Q3ZXG3	cbdbA778	Uncharacterized protein OS=Dehalococcoides mccartyi (strain CBDB1) GN=cbdbA778 PE=4 SV=1	1.81452	2.25247	0.629423	0.125047
Q3ZZX4	cbdbA1724	Putative sodium exchanger OS=Dehalococcoides mccartyi (strain CBDB1) GN=cbdbA1724 PE=4 SV=1	Id.	1.28895		0.104853	Cellular processes and signaling
Q3ZVY3	cbdbA1593	Nitrogenase iron-molybdenum cofactor maturation domain protein OS=Dehalococcoides mccartyi (strain CBDB1) GN=cbdbA1593 PE=4 SV=1	1.00145	1.19079	0.0451152	0.0427625
Q3ZYT0	cbdbA1328	Pseudouridine synthase OS=Dehalococcoides mccartyi (strain CBDB1) GN=cbdbA1328 PE=3 SV=1	n.d.	Id.			Translation
Q3ZYF1	cbdbA1195	Deoxyguanosinetriphosphate triphosphohydrolase-like protein OS=Dehalococcoides mccartyi (strain CBDB1) GN=cbdbA1195 PE=3 SV=1	1.07525	1.13302	0.0720174	0.120453	Nucleotide metabolism
Q3ZXG7	cbdbA774	Transport permease protein OS=Dehalococcoides mccartyi (strain CBDB1) GN=cbdbA774 PE=3 SV=1	1.92317	1.8259	0.0760535	0.108879	Membrane transport
Q3ZYR1	cbdbA1298	RNA polymerase sigma-70 factor, ECF subfamily OS=Dehalococcoides mccartyi (strain CBDB1) GN=cbdbA1298 PE=4 SV=1	1.70088	1.7033	0.0685608	0.107159	Transcription
Q3ZW09	cbdbA1620	Radical SAM/B12 binding domain protein OS=Dehalococcoides mccartyi (strain CBDB1) GN=cbdbA1620 PE=4 SV=1	n.d.	1.0211		0.0701895
Q3ZXY9	cbdbA994	Ribonuclease 3 OS=Dehalococcoides mccartyi (strain CBDB1) GN=rnc PE=3 SV=1	1.57846	1.86181	0.150422	0.0762082	Cancers; Replication and repair; Translation
Q3ZYS1	cbdbA1339	Preprotein translocase, YajC subunit OS=Dehalococcoides mccartyi (strain CBDB1) GN=yajC PE=4 SV=1	1.7237	1.89385	0.0911309	0.243757	Cellular community - prokaryotes; Folding, sorting and degradation; Membrane transport
Q3ZWT3	cbdbA228	Uncharacterized protein OS=Dehalococcoides mccartyi (strain CBDB1) GN=cbdbA228 PE=4 SV=1	1.0105	1.31689	0.26642	0.29215	Poorly characterized
Q3ZZH4	cbdbA377	Uncharacterized protein OS=Dehalococcoides mccartyi (strain CBDB1) GN=cbdbA377 PE=4 SV=1	1.67476	1.89704	0.0419757	0.152742
Q3ZWM6	cbdbA175	Probable lysophospholipase OS=Dehalococcoides mccartyi (strain CBDB1) GN=cbdbA175 PE=4 SV=1	Id.	1.47097		0.0388712
Q3ZXV9	cbdbA928	ATP-dependent RNA helicase, DEAD OS=Dehalococcoides mccartyi (strain CBDB1) GN=cbdbA928 PE=4 SV=1	1.72391	1.03708	1.00023	0.901101	Poorly characterized
Q3ZZV1	cbdbA523	DNA-binding protein OS=Dehalococcoides mccartyi (strain CBDB1) GN=cbdbA523 PE=4 SV=1	1.52153	1.68008	0.433283	0.125062	Transcription
Q3ZXC6	cbdbA716	tRNA dimethylallyltransferase OS=Dehalococcoides mccartyi (strain CBDB1) GN=miaA PE=3 SV=1	Id.	Id.			Metabolism of terpenoids and polyketides; Translation
Q3ZYP3	cbdbA1317	Uncharacterized protein OS=Dehalococcoides mccartyi (strain CBDB1) GN=cbdbA1317 PE=4 SV=1	n.d.	Id.
Q3ZYE5	cbdbA1172	NADPH-dependent FMN reductase OS=Dehalococcoides mccartyi (strain CBDB1) GN=cbdbA1172 PE=4 SV=1	1.53551	1.37215	0.0467465	0.139456
Q3ZX35	cbdbA615	Lysine 2,3-aminomutase OS=Dehalococcoides mccartyi (strain CBDB1) GN=kamA PE=4 SV=1	n.d.	1.18472		0.062061	Amino acid metabolism
Q3ZYK8	cbdbA1247	Uncharacterized protein OS=Dehalococcoides mccartyi (strain CBDB1) GN=cbdbA1247 PE=4 SV=1	2.61761	2.837	0.0555671	0.14328	Poorly characterized
Q3ZYQ9	cbdbA1300	DNA-binding protein, excisionase family OS=Dehalococcoides mccartyi (strain CBDB1) GN=cbdbA1300 PE=4 SV=1	1.70068	1.91875	0.209017	0.35335
Q3ZZF8	cbdbA340	AP endonuclease, family 2 protein OS=Dehalococcoides mccartyi (strain CBDB1) GN=cbdbA340 PE=4 SV=1	n.d.	1.41598		0.0615738	Replication and repair
Q3ZWC9	cbdbA56	Redox family protein OS=Dehalococcoides mccartyi (strain CBDB1) GN=cbdbA56 PE=4 SV=1	1.78885	1.6286	0.137196	0.0447183
Q3ZZT0	cbdbA485	ABC transporter, permease protein OS=Dehalococcoides mccartyi (strain CBDB1) GN=cbdbA485 PE=4 SV=1	1.83885	2.04567	0.162607	0.114031	Membrane transport
Q3ZZF7	cbdbA342	Ribosomal silencing factor RsfS OS=Dehalococcoides mccartyi (strain CBDB1) GN=rsfS PE=3 SV=1	2.25766	1.93164	0.087234	0.0719277	Translation
Q3ZZA6	cbdbA279	tRNA (guanine-N(1)-)-methyltransferase OS=Dehalococcoides mccartyi (strain CBDB1) GN=trmD PE=3 SV=1	1.85283	1.68982	0.00450408	0.117757	Translation
Q3ZXF1	cbdbA737	Uncharacterized protein OS=Dehalococcoides mccartyi (strain CBDB1) GN=cbdbA737 PE=4 SV=1	Id.	1.22855		0.232798
Q3ZWC2	cbdbA67	Putative Holliday junction resolvase OS=Dehalococcoides mccartyi (strain CBDB1) GN=cbdbA67 PE=3 SV=1	Id.	0.840648		0.320852	Genetic information processing
Q3ZW25	cbdbA1662	Uncharacterized protein OS=Dehalococcoides mccartyi (strain CBDB1) GN=cbdbA1662 PE=4 SV=1	2.49024	2.59163	0.0583546	0.203893
Q3ZZX3	cbdbA1725	Metallo-beta-lactamase family protein OS=Dehalococcoides mccartyi (strain CBDB1) GN=cbdbA1725 PE=4 SV=1	1.08939	1.54093	0.205048	0.112251
Q3ZXS4	cbdbA919	tRNA modification enzyme, MiaB family OS=Dehalococcoides mccartyi (strain CBDB1) GN=cbdbA919 PE=4 SV=1	Id.	0.892215		0.286904	Translation
Q3ZW16	cbdbA1612	ABC-transporter, ATPase and permease component OS=Dehalococcoides mccartyi (strain CBDB1) GN=cbdbA1612 PE=3 SV=1	1.41135	1.26752	0.163547	0.0314416	Membrane transport
Q3ZW86	cbdbA1698	2-amino-4-hydroxy-6-hydroxymethyldihydropteridine pyrophosphokinase OS=Dehalococcoides mccartyi (strain CBDB1) GN=folK PE=4 SV=1	1.53548	1.47621	0.110087	0.0776292	Metabolism of cofactors and vitamins
Q3ZZ77	cbdbB37	Uncharacterized protein OS=Dehalococcoides mccartyi (strain CBDB1) GN=cbdbA1520.1 PE=4 SV=1	0.973121	1.5969	0.242946	0.21582	Transport and catabolism
Q3ZX77	cbdbA671	Metallopeptidase, M24 family OS=Dehalococcoides mccartyi (strain CBDB1) GN=cbdbA671 PE=3 SV=1	1.47453	1.31096	0.121588	0.100129	Enzyme families
Q3ZXS6	cbdbA916	Imidazoleglycerol phosphate synthase, cyclase subunit OS=Dehalococcoides mccartyi (strain CBDB1) GN=hisF PE=3 SV=1	n.d.	1.33012		0.129531	Amino acid metabolism
Q3ZVY6	cbdbA1589	DNA-binding response regulator OS=Dehalococcoides mccartyi (strain CBDB1) GN=rdhD PE=4 SV=1	n.d.	Id.
Q3ZXM7	cbdbA869	Uncharacterized protein OS=Dehalococcoides mccartyi (strain CBDB1) GN=cbdbA869 PE=4 SV=1	Id.	1.96662		0.042788
Q3ZW13	cbdbA1616	Transcriptional regulator, MarR family OS=Dehalococcoides mccartyi (strain CBDB1) GN=rdhR PE=4 SV=1	n.d.	1.18531		0.23166
Q3ZZW4	cbdbA1737	Uncharacterized protein OS=Dehalococcoides mccartyi (strain CBDB1) GN=cbdbA1737 PE=4 SV=1	2.247	2.18003	0.275276	0.0571465	Poorly characterized
Q3ZW85	cbdbA1699	6-carboxy-5,6,7,8-tetrahydropterin synthase OS=Dehalococcoides mccartyi (strain CBDB1) GN=ptpS PE=3 SV=1	0.92332	1.44839	0.43186	0.0477659	Metabolism of cofactors and vitamins; Translation
Q3ZZ21	cbdbA1438	Uncharacterized protein OS=Dehalococcoides mccartyi (strain CBDB1) GN=cbdbA1438 PE=4 SV=1	1.61067	1.92678	0.0464064	0.193064
Q3ZZ37	cbdbA1471	Uncharacterized protein OS=Dehalococcoides mccartyi (strain CBDB1) GN=cbdbA1471 PE=4 SV=1	0.965227	1.21345	0.0297439	0.125662
Q3ZYY4	cbdbA1432	DNA repair protein, RadC family OS=Dehalococcoides mccartyi (strain CBDB1) GN=cbdbA1432 PE=3 SV=1	n.d.	1.08607		0.366718	Genetic information processing
Q3ZYF8	cbdbA1186	50S ribosomal protein L28 OS=Dehalococcoides mccartyi (strain CBDB1) GN=rpmB PE=3 SV=1	2.89316	2.79255	0.0499638	0.0672624	Translation
Q3ZWX5	cbdbA559	Uncharacterized protein OS=Dehalococcoides mccartyi (strain CBDB1) GN=cbdbA559 PE=4 SV=1	0.954967	1.01099	0.272386	0.0280977
Q3ZVV8	cbdbA1567.1	Uncharacterized protein OS=Dehalococcoides mccartyi (strain CBDB1) GN=cbdbA1567.1 PE=4 SV=1	1.9875	1.87792	0.204473	0.0940793
Q3ZVW2	cbdbA1564	DNA-binding response regulator OS=Dehalococcoides mccartyi (strain CBDB1) GN=rdhD PE=4 SV=1	1.13524	1.11624	0.134974	0.409423	Cellular community - prokaryotes; Signal transduction
Q3ZW43	cbdbA1640	Uncharacterized protein OS=Dehalococcoides mccartyi (strain CBDB1) GN=cbdbA1640 PE=4 SV=1	0.969542	1.34391	0.0432987	0.122785
Q3ZX63	cbdbA630	Nitroreductase family protein OS=Dehalococcoides mccartyi (strain CBDB1) GN=cbdbA630 PE=4 SV=1	Id.	0.939773		0.161013
Q3ZXH3	cbdbA767	Pseudouridine synthase OS=Dehalococcoides mccartyi (strain CBDB1) GN=cbdbA767 PE=3 SV=1	0.780447	0.802465	0.582982	0.117296	Translation
Q3ZW49	cbdbA1693	Putative twin-arginine translocation protein TatB OS=Dehalococcoides mccartyi (strain CBDB1) GN=tatB PE=4 SV=1	2.48752	2.22055	0.0843081	0.0416559	Folding, sorting and degradation; Membrane transport
Q3ZYS0	cbdbA1340	tRNA-2-methylthio-N(6)-dimethylallyladenosine synthase OS=Dehalococcoides mccartyi (strain CBDB1) GN=miaB PE=3 SV=1	n.d.	Id.			Translation
Q3ZW17	cbdbA1611	Transcriptional regulator, MerR family OS=Dehalococcoides mccartyi (strain CBDB1) GN=cbdbA1611 PE=4 SV=1	0.678823	Id.	0.111581
Q3ZZR0	cbdbA513	DnaD OS=Dehalococcoides mccartyi (strain CBDB1) GN=cbdbA513 PE=4 SV=1	1.42775	1.58363	0.0149709	0.0706139
Q3ZYX2	cbdbA1388	Uncharacterized protein OS=Dehalococcoides mccartyi (strain CBDB1) GN=cbdbA1388 PE=4 SV=1	0.85899	1.37196	0.0950778	0.0627432
Q3ZWK9	cbdbA137	Transcriptional regulator, TetR family OS=Dehalococcoides mccartyi (strain CBDB1) GN=cbdbA137 PE=4 SV=1	n.d.	1.51818		0.146357
Q3ZXG0	cbdbA781	3-methyl-2-oxobutanoate hydroxymethyltransferase OS=Dehalococcoides mccartyi (strain CBDB1) GN=panB PE=3 SV=1	1.31199	1.26768	0.288633	0.214314	Metabolism of cofactors and vitamins
Q3ZWR5	cbdbA186	Uncharacterized protein OS=Dehalococcoides mccartyi (strain CBDB1) GN=cbdbA186 PE=4 SV=1	n.d.	1.51666		0.0393124
Q3ZWR6	cbdbA215	Oxidoreductase, aldo reductase OS=Dehalococcoides mccartyi (strain CBDB1) GN=cbdbA215 PE=4 SV=1	n.d.	0.916954		0.35078
Q3ZW08	cbdbA1621	Major facilitator family transporter OS=Dehalococcoides mccartyi (strain CBDB1) GN=cbdbA1621 PE=4 SV=1	1.70999	1.51553	0.257068	0.207334
Q3ZZG2	cbdbA391	Putative uracil-DNA glycosylase OS=Dehalococcoides mccartyi (strain CBDB1) GN=cbdbA391 PE=4 SV=1	1.53134	1.44933	0.144442	0.111441	Replication and repair
Q3ZXN9	cbdbA856	Membrane protein, MmpL domain OS=Dehalococcoides mccartyi (strain CBDB1) GN=cbdbA856 PE=4 SV=1	0.850684	Id.	0.106998		Poorly characterized
Q3ZY32	cbdbA1053	Response regulator OS=Dehalococcoides mccartyi (strain CBDB1) GN=cbdbA1053 PE=4 SV=1	n.d.	1.3891		0.100168
Q3ZW23	cbdbA1664	Transcriptional regulator, TetR family OS=Dehalococcoides mccartyi (strain CBDB1) GN=cbdbA1664 PE=4 SV=1	Id.	n.d.
Q3ZZ74	cbdbA1523	Hypothetical membrane protein OS=Dehalococcoides mccartyi (strain CBDB1) GN=cbdbA1523 PE=4 SV=1	1.41897	1.18381	0.312901	0.125975
Q3ZXG6	cbdbA775	S-adenosylmethionine:tRNA ribosyltransferase-isomerase OS=Dehalococcoides mccartyi (strain CBDB1) GN=queA PE=3 SV=1	Id.	1.19182		0.144813	Translation
Q3ZXE0	cbdbA750	Ribosomal RNA small subunit methyltransferase G OS=Dehalococcoides mccartyi (strain CBDB1) GN=rsmG PE=3 SV=1	1.24053	1.16953	0.412606	0.0257896	Replication and repair; Translation
Q3ZZK5	cbdbA399	Crossover junction endodeoxyribonuclease RuvC OS=Dehalococcoides mccartyi (strain CBDB1) GN=ruvC PE=3 SV=1	1.52699	1.25545	0.092772	0.00276457	Replication and repair
Q3ZYT9	cbdbA1373	Putative transcriptional regulator, MerR family OS=Dehalococcoides mccartyi (strain CBDB1) GN=cbdbA1373 PE=4 SV=1	n.d.	1.27576		0.170222	Transcription
Q3ZXB9	cbdbA722	Putative hypoxanthine phosphoribosyl transferase with additional GAF motif OS=Dehalococcoides mccartyi (strain CBDB1) GN=hpt PE=4 SV=1	Id.	1.37573		0.0685334	Nucleotide metabolism; Xenobiotics biodegradation and metabolism
Q3ZWT0	cbdbA232	Uncharacterized protein OS=Dehalococcoides mccartyi (strain CBDB1) GN=cbdbA232 PE=4 SV=1	1.83609	1.65285	0.405327	0.462683
Q3ZYQ1	cbdbA1308	Uncharacterized protein OS=Dehalococcoides mccartyi (strain CBDB1) GN=cbdbA1308 PE=4 SV=1	2.50598	1.94234	0.264863	0.413244
Q3ZYR2	cbdbA1297	Uncharacterized protein OS=Dehalococcoides mccartyi (strain CBDB1) GN=cbdbA1297 PE=4 SV=1	1.13732	1.853	0.154494	0.0489886
Q3ZZW1	cbdbA1741	Aldolase, class II OS=Dehalococcoides mccartyi (strain CBDB1) GN=cbdbA1741 PE=4 SV=1	Id.	1.23092		0.312703	Carbohydrate metabolism
Q3ZWG5	cbdbA75	2-C-methyl-D-erythritol 2,4-cyclodiphosphate synthase OS=Dehalococcoides mccartyi (strain CBDB1) GN=ispF PE=3 SV=1	2.14127	1.45917	0.0589987	0.150496	Metabolism of terpenoids and polyketides
Q3ZZW7	cbdbA1733	Uncharacterized protein OS=Dehalococcoides mccartyi (strain CBDB1) GN=cbdbA1733 PE=4 SV=1	n.d.	1.59122		0.335661
Q3ZWN7	cbdbA161	Phosphate ABC transporter, phosphate-binding protein OS=Dehalococcoides mccartyi (strain CBDB1) GN=pstS PE=4 SV=1	1.47175	1.06818	0.066155	0.210947	Membrane transport; Signal transduction
Q3ZZ32	cbdbA1478	Transcriptional regulator, Fur family OS=Dehalococcoides mccartyi (strain CBDB1) GN=cbdbA1478 PE=4 SV=1	Id.	1.40666		0.0356261	Transcription
Q3ZYX4	cbdbA1386	Phosphoglycerate mutase family protein OS=Dehalococcoides mccartyi (strain CBDB1) GN=cbdbA1386 PE=4 SV=1	1.27289	1.61614	0.168476	0.0752831
Q3ZZE1	cbdbA361	PolyA polymerase family protein OS=Dehalococcoides mccartyi (strain CBDB1) GN=cbdbA361 PE=3 SV=1	0.942608	1.14529	0.105962	0.162726	Translation
Q3ZWY5	cbdbA545	Uncharacterized protein OS=Dehalococcoides mccartyi (strain CBDB1) GN=cbdbA545 PE=4 SV=1	1.18772	1.49904	0.230094	0.0818155
Q3ZX85	cbdbA662	Uncharacterized protein OS=Dehalococcoides mccartyi (strain CBDB1) GN=cbdbA662 PE=4 SV=1	0.758614	1.51094	0.0226179	0.139374
Q3ZYK4	cbdbA1252	Uncharacterized protein OS=Dehalococcoides mccartyi (strain CBDB1) GN=cbdbA1252 PE=4 SV=1	n.d.	1.82302		0.110696
Q3ZWP8	cbdbA206	Uncharacterized protein OS=Dehalococcoides mccartyi (strain CBDB1) GN=cbdbA206 PE=4 SV=1	n.d.	Id.
Q3ZXL1	cbdbA833	Uncharacterized protein OS=Dehalococcoides mccartyi (strain CBDB1) GN=cbdbA833 PE=4 SV=1	1.15971	1.33271	0.385163	0.0671217	Replication and repair
Q3ZZ95	cbdbA293	30S ribosomal protein S21 OS=Dehalococcoides mccartyi (strain CBDB1) GN=rpsU PE=3 SV=1	2.87603	2.37978	0.118132	0.180787	Translation
Q3ZXF2	cbdbA736	Uncharacterized protein OS=Dehalococcoides mccartyi (strain CBDB1) GN=cbdbA736 PE=4 SV=1	n.d.	1.46391		0.0191604
Q3ZY80	cbdbA1107	Signal peptidase I OS=Dehalococcoides mccartyi (strain CBDB1) GN=lepB PE=3 SV=1	1.50041	1.30385	0.135996	0.0454984	Cellular community - prokaryotes; Enzyme families; Folding, sorting and degradation
Q3ZW00	cbdbA1630	DNA-binding response regulator OS=Dehalococcoides mccartyi (strain CBDB1) GN=rdhD PE=4 SV=1	n.d.	Id.			Cellular community - prokaryotes; Signal transduction
Q3ZWT9	cbdbA218	PBS lyase HEAT-like repeat domain protein OS=Dehalococcoides mccartyi (strain CBDB1) GN=cbdbA218 PE=4 SV=1	1.29051	1.44102	0.480376	0.074212
Q3ZYM2	cbdbA1288	DNA-binding protein OS=Dehalococcoides mccartyi (strain CBDB1) GN=cbdbA1288 PE=4 SV=1	n.d.	1.42239		0.106514	Transcription
Q3ZX38	cbdbA599	Uncharacterized protein OS=Dehalococcoides mccartyi (strain CBDB1) GN=cbdbA599 PE=4 SV=1	1.56477	2.27839	0.0886301	0.0679481
Q3ZWP7	cbdbA207	Glutaredoxin family protein OS=Dehalococcoides mccartyi (strain CBDB1) GN=cbdbA207 PE=4 SV=1	1.17858	1.76377	0.300513	0.0218559
Q3ZXA1	cbdbA693	Uncharacterized protein OS=Dehalococcoides mccartyi (strain CBDB1) GN=cbdbA693 PE=4 SV=1	Id.	1.62963		0.03895
Q3ZXH0	cbdbA770	Hypoxanthine phosphoribosyltransferase OS=Dehalococcoides mccartyi (strain CBDB1) GN=hpt PE=4 SV=1	Id.	1.46075		0.123764	Nucleotide metabolism; Xenobiotics biodegradation and metabolism
Q3ZY86	cbdbA1100	Conserved domain protein OS=Dehalococcoides mccartyi (strain CBDB1) GN=cbdbA1100 PE=4 SV=1	Id.	1.92719		0.198114
Q3ZYK0	cbdbB27	Conserved domain protein OS=Dehalococcoides mccartyi (strain CBDB1) GN=cbdbA1255.1 PE=4 SV=1	2.35108	2.35504	0.149006	0.129829
Q3ZVU3	cbdbB39	Uncharacterized protein OS=Dehalococcoides mccartyi (strain CBDB1) GN=cbdbA1533.1 PE=4 SV=1	1.92859	1.97427	0.105455	0.372531
Q3ZY78	cbdbA1109	Uncharacterized protein OS=Dehalococcoides mccartyi (strain CBDB1) GN=cbdbA1109 PE=4 SV=1	0.969693	1.00162	0.107677	0.472514
Q3ZXI9	cbdbA802	Probable nitroreductase family protein OS=Dehalococcoides mccartyi (strain CBDB1) GN=cbdbA802 PE=4 SV=1	1.06231	1.46958	0.469312	0.0103796
Q3ZYJ5	cbdbA1263	Putative iron-sulfur flavoprotein OS=Dehalococcoides mccartyi (strain CBDB1) GN=cbdbA1263 PE=4 SV=1	n.d.	1.20908		0.0101304
Q3ZWU0	cbdbA217	UPF0251 protein cbdbA217 OS=Dehalococcoides mccartyi (strain CBDB1) GN=cbdbA217 PE=3 SV=1	0.905079	1.74077	0.474459	0.0682836
Q3ZZE7	cbdbA354	Serine/threonine protein phosphatase family protein OS=Dehalococcoides mccartyi (strain CBDB1) GN=cbdbA354 PE=4 SV=1	1.33161	1.26308	0.0630041	0.0686795
Q3ZX56	cbdbA638	Cobalamin biosynthesis protein CobD OS=Dehalococcoides mccartyi (strain CBDB1) GN=cobD PE=3 SV=1	0.874111	1.2457	0.0988873	0.178908	Metabolism of cofactors and vitamins
Q3ZVV9	cbdbA1567	Probable regulatory protein, LuxR domain OS=Dehalococcoides mccartyi (strain CBDB1) GN=rdhD PE=4 SV=1	Id.	Id.
Q3ZWL2	cbdbA133	ABC transporter, permease protein OS=Dehalococcoides mccartyi (strain CBDB1) GN=cbdbA133 PE=4 SV=1	1.54061	1.45811	0.233066	0.0644785	Membrane transport
Q3ZVZ2	cbdbA1583	Transcriptional regulator, MarR family OS=Dehalococcoides mccartyi (strain CBDB1) GN=rdhR PE=4 SV=1	1.6466	1.60661	0.018131	0.0023649
Q3ZZ97	cbdbA290	Radical SAM domain protein OS=Dehalococcoides mccartyi (strain CBDB1) GN=cbdbA290 PE=4 SV=1	1.2782	1.45674	0.0181611	0.0493243
Q3ZZL1	cbdbB14	30S ribosomal protein S14 type Z OS=Dehalococcoides mccartyi (strain CBDB1) GN=rpsZ PE=3 SV=1	2.99689	2.74375	0.177704	0.0299406	Translation
Q3ZXH2	cbdbA768	Putative phosphoribosyltransferase OS=Dehalococcoides mccartyi (strain CBDB1) GN=cbdbA768 PE=4 SV=1	1.60473	1.52433	0.134478	0.363757
Q3ZWQ8	cbdbA193	Formate dehydrogenase, membrane subunit OS=Dehalococcoides mccartyi (strain CBDB1) GN=OmeB PE=4 SV=1	2.78569	2.1622	0.0971529	0.225882
Q3ZZ90	cbdbA299	Uncharacterized protein OS=Dehalococcoides mccartyi (strain CBDB1) GN=cbdbA299 PE=4 SV=1	1.87433	1.73012	0.13325	0.115095
Q3ZWD0	cbdbA55	Uncharacterized protein OS=Dehalococcoides mccartyi (strain CBDB1) GN=cbdbA55 PE=4 SV=1	n.d.	0.798008		0.0924251
Q3ZYR4	cbdbA1349	Rhodanese-like domain protein OS=Dehalococcoides mccartyi (strain CBDB1) GN=cbdbA1349 PE=4 SV=1	1.09589	1.58171	0.0702107	0.0775672
Q3ZYU7	cbdbA1365	Conserved domain protein OS=Dehalococcoides mccartyi (strain CBDB1) GN=cbdbA1365 PE=4 SV=1	1.57269	Id.	0.275871
Q3ZXK0	cbdbA818	Uncharacterized protein OS=Dehalococcoides mccartyi (strain CBDB1) GN=cbdbA818 PE=4 SV=1	2.08782	1.6071	0.0904961	0.0991375
Q3ZZG6	cbdbA387	Uncharacterized protein OS=Dehalococcoides mccartyi (strain CBDB1) GN=cbdbA387 PE=4 SV=1	n.d.	1.37446		0.253269
Q3ZYW3	cbdbA1400	Hydrogenase assembly chaperone HypC OS=Dehalococcoides mccartyi (strain CBDB1) GN=hypC PE=4 SV=1	2.03638	1.61775	0.414195	0.282249	Genetic information processing
Q3ZYN0	cbdbA1277	Acetyltransferase, GNAT family OS=Dehalococcoides mccartyi (strain CBDB1) GN=cbdbA1277 PE=4 SV=1	Id.	1.68062		0.023624
Q3ZWV1	cbdbA263	Patatin-like phospholipase family protein OS=Dehalococcoides mccartyi (strain CBDB1) GN=cbdbA263 PE=4 SV=1	n.d.	1.49428		0.0659434	Poorly characterized
Q3ZW88	cbdbA3	Probable nicotinate-nucleotide adenylyltransferase OS=Dehalococcoides mccartyi (strain CBDB1) GN=nadD PE=3 SV=1	1.76894	1.48462	0.0470209	0.203887	Metabolism of cofactors and vitamins
Q3ZWP3	cbdbA213	LmbE-like family protein OS=Dehalococcoides mccartyi (strain CBDB1) GN=cbdbA213 PE=4 SV=1	1.44612	Id.	0.257743
Q3ZXQ7	cbdbA891	Thioesterase family protein OS=Dehalococcoides mccartyi (strain CBDB1) GN=cbdbA891 PE=4 SV=1	Id.	1.29513		0.0388772	Amino acid metabolism
Q3ZY54	cbdbA1083	Putative transcriptional regulator, PadR-like family OS=Dehalococcoides mccartyi (strain CBDB1) GN=cbdbA1083 PE=4 SV=1	1.74606	1.35224	0.0341584	0.151789
Q3ZYC5	cbdbA1165	TfoX domain protein OS=Dehalococcoides mccartyi (strain CBDB1) GN=cbdbA1165 PE=4 SV=1	n.d.	1.54224		0.222193	Cellular processes and signaling
Q3ZWJ3	cbdbA156	Uncharacterized protein OS=Dehalococcoides mccartyi (strain CBDB1) GN=cbdbA156 PE=4 SV=1	1.60591	Id.	0.260826
Q3ZWK5	cbdbA142	Uncharacterized protein OS=Dehalococcoides mccartyi (strain CBDB1) GN=cbdbA142 PE=4 SV=1	2.25241	1.75531	0.207963	0.0969358
Q3ZWE7	cbdbA91	Sensor histidine kinase OS=Dehalococcoides mccartyi (strain CBDB1) GN=rdhC PE=4 SV=1	n.d.	1.08919		0.0790884
Q3ZW50	cbdbA1691	Sec-independent protein translocase protein TatC OS=Dehalococcoides mccartyi (strain CBDB1) GN=tatC PE=3 SV=1	1.6243	1.09341	0.0643938	0.183651	Folding, sorting and degradation; Membrane transport
Q3ZX18	cbdbA624	Uncharacterized protein OS=Dehalococcoides mccartyi (strain CBDB1) GN=cbdbA624 PE=4 SV=1	Id.	1.28262		0.590049
Q3ZYX3	cbdbA1387	Peptidase, M48 family OS=Dehalococcoides mccartyi (strain CBDB1) GN=cbdbA1387 PE=3 SV=1	Id.	0.952047		0.599254	Enzyme families; Metabolism of terpenoids and polyketides; Transport and catabolism
Q3ZYD2	cbdbA1156	Uncharacterized protein OS=Dehalococcoides mccartyi (strain CBDB1) GN=cbdbA1156 PE=4 SV=1	1.06053	1.29583	0.0575356	0.100287
Q3ZYK5	cbdbA1251	Conserved domain protein OS=Dehalococcoides mccartyi (strain CBDB1) GN=cbdbA1251 PE=4 SV=1	Id.	Id.
Q3ZY92	cbdbA1095	Uncharacterized protein OS=Dehalococcoides mccartyi (strain CBDB1) GN=cbdbA1095 PE=4 SV=1	0.994222	Id.	0.0354094
Q3ZW70	cbdbA1696	Dihydropteroate synthase OS=Dehalococcoides mccartyi (strain CBDB1) GN=folP PE=4 SV=1	n.d.	0.979029		0.353768	Metabolism of cofactors and vitamins
Q3ZYL3	cbdbA1240	Uncharacterized protein OS=Dehalococcoides mccartyi (strain CBDB1) GN=cbdbA1240 PE=4 SV=1	1.58369	1.40838	0.124976	0.0630412
Q3ZVU6	cbdbA1531	Uncharacterized protein OS=Dehalococcoides mccartyi (strain CBDB1) GN=cbdbA1531 PE=4 SV=1	n.d.	1.4077		0.039032
Q3ZWA7	cbdbA18	Putative folylpolyglutamate synthetase OS=Dehalococcoides mccartyi (strain CBDB1) GN=folC PE=3 SV=1	1.37136	Id.	0.0508574		Metabolism of cofactors and vitamins
Q3ZYQ4	cbdbA1305	Putative type II secretion system protein OS=Dehalococcoides mccartyi (strain CBDB1) GN=cbdbA1305 PE=4 SV=1	n.d.	1.08753		0.143468
Q3ZW38	cbdbB43	Iron-sulfur cluster-binding protein OS=Dehalococcoides mccartyi (strain CBDB1) GN=cbdbA1646.1 PE=4 SV=1	Id.	1.28538		0.230399
Q3ZYG7	cbdbA1174	Uncharacterized protein OS=Dehalococcoides mccartyi (strain CBDB1) GN=cbdbA1174 PE=4 SV=1	1.80482	1.72748	0.234066	0.0409559
Q3ZXN8	cbdbA857	Putative DNA-binding protein OS=Dehalococcoides mccartyi (strain CBDB1) GN=cbdbA857 PE=4 SV=1	1.29026	1.43922	0.0703714	0.0809715
Q3ZXK7	cbdbA838	ABC transporter, permease protein OS=Dehalococcoides mccartyi (strain CBDB1) GN=cbdbA838 PE=4 SV=1	1.41744	n.d.	0.136713		Membrane transport
Q3ZVU4	cbdbA1533	Uncharacterized protein OS=Dehalococcoides mccartyi (strain CBDB1) GN=cbdbA1533 PE=4 SV=1	n.d.	Id.
Q3ZYP1	cbdbA1319	Radical SAM domain protein OS=Dehalococcoides mccartyi (strain CBDB1) GN=cbdbA1319 PE=4 SV=1	0.760627	n.d.	0.191869		Genetic information processing
Q3ZZA8	cbdbA277	Primosomal protein N OS=Dehalococcoides mccartyi (strain CBDB1) GN=priA PE=4 SV=1	Id.	Id.			Replication and repair
Q3ZWX7	cbdbA557	DNA repair protein RecO OS=Dehalococcoides mccartyi (strain CBDB1) GN=recO PE=3 SV=1	Id.	0.836269		0.434781	Replication and repair
Q3ZWR0	cbdbA190	Membrane protein, TerC family OS=Dehalococcoides mccartyi (strain CBDB1) GN=cbdbA190 PE=4 SV=1	n.d.	Id.			Cellular processes and signaling
Q3ZXM6	cbdbA870	Uncharacterized protein OS=Dehalococcoides mccartyi (strain CBDB1) GN=cbdbA870 PE=4 SV=1	n.d.	1.33151		0.0300407	Poorly characterized
Q3ZYM8	cbdbA1279	Uncharacterized protein OS=Dehalococcoides mccartyi (strain CBDB1) GN=cbdbA1279 PE=4 SV=1	1.23202	1.38986	0.0436934	0.0622897
Q3ZW01	cbdbA1629	Sensor histidine kinase OS=Dehalococcoides mccartyi (strain CBDB1) GN=rdhC PE=4 SV=1	n.d.	Id.
Q3ZXU0	cbdbA950	Mg chelatase, homolog OS=Dehalococcoides mccartyi (strain CBDB1) GN=cbdbA950 PE=4 SV=1	Id.	1.08151		0.061884	Genetic information processing
Q3ZXS0	cbdbA875	NADH-quinone oxidoreductase subunit B OS=Dehalococcoides mccartyi (strain CBDB1) GN=nuoB PE=3 SV=1	n.d.	Id.			Energy metabolism
Q3ZVW1	cbdbA1565	Sensor histidine kinase OS=Dehalococcoides mccartyi (strain CBDB1) GN=rdhC PE=4 SV=1	Id.	Id.
Q3ZYE9	cbdbA1198	Uncharacterized protein OS=Dehalococcoides mccartyi (strain CBDB1) GN=cbdbA1198 PE=4 SV=1	2.72991	2.39628	0.129243	0.0805578
Q3ZZE5	cbdbA356	4-diphosphocytidyl-2-C-methyl-D-erythritol kinase OS=Dehalococcoides mccartyi (strain CBDB1) GN=ispE PE=3 SV=1	Id.	1.5014		0.388748	Metabolism of terpenoids and polyketides
Q3ZY21	cbdbA1011	Serine protease, DegP OS=Dehalococcoides mccartyi (strain CBDB1) GN=cbdbA1011 PE=4 SV=1	n.d.	Id.			Drug resistance; Enzyme families; Folding, sorting and degradation; Signal transduction
Q3ZZP4	cbdbA468	tRNA pseudouridine synthase A OS=Dehalococcoides mccartyi (strain CBDB1) GN=truA PE=3 SV=1	n.d.	1.27667		0.144026	Translation
Q3ZYD5	cbdbA1151	Uncharacterized protein OS=Dehalococcoides mccartyi (strain CBDB1) GN=cbdbA1151 PE=4 SV=1	Id.	Id.
Q3ZXJ9	cbdbA789	ABC transporter, ATP-binding protein OS=Dehalococcoides mccartyi (strain CBDB1) GN=cbdbA789 PE=3 SV=1	Id.	1.456		0.159447	Membrane transport
Q3ZYC0	cbdbA1140	Fumarylacetoacetate hydrolase family protein OS=Dehalococcoides mccartyi (strain CBDB1) GN=cbdbA1140 PE=4 SV=1	n.d.	0.928617		0.14399
Q3ZYY5	cbdbA1430	Hypothetical periplasmic protein OS=Dehalococcoides mccartyi (strain CBDB1) GN=cbdbA1430 PE=4 SV=1	1.35345	1.67198	0.169186	0.0792195
Q3ZWV2	cbdbA262	Transcriptional regulator cNTP-binding, Crp OS=Dehalococcoides mccartyi (strain CBDB1) GN=cbdbA262 PE=4 SV=1	n.d.	1.03176		0.279192	Cellular community - prokaryotes; Signal transduction; Transcription
Q3ZZV9	cbdbA1716	Putative ABC-transporter, permease component OS=Dehalococcoides mccartyi (strain CBDB1) GN=cbdbA1716 PE=4 SV=1	Id.	1.51437		0.0872761	Membrane transport
Q3ZZH3	cbdbA378	Uncharacterized protein OS=Dehalococcoides mccartyi (strain CBDB1) GN=cbdbA378 PE=4 SV=1	Id.	n.d.			Poorly characterized
Q3ZYA8	cbdbA1128	Release factor glutamine methyltransferase OS=Dehalococcoides mccartyi (strain CBDB1) GN=prmC PE=3 SV=1	n.d.	0.919671		0.192372	Translation
Q3ZXN7	cbdbA858	Uncharacterized protein OS=Dehalococcoides mccartyi (strain CBDB1) GN=cbdbA858 PE=4 SV=1	n.d.	1.10485		0.271752
Q3ZXV1	cbdbA937	Acetyltransferase, GNAT family OS=Dehalococcoides mccartyi (strain CBDB1) GN=cbdbA937 PE=4 SV=1	Id.	1.03423		0.423357
Q3ZYI1	cbdbA1220	Serine protease, DegP OS=Dehalococcoides mccartyi (strain CBDB1) GN=cbdbA1220 PE=4 SV=1	1.32129	1.3487	0.0227779	0.0914903
Q3ZYC7	cbdbA1163	Peptide methionine sulfoxide reductase MsrB OS=Dehalococcoides mccartyi (strain CBDB1) GN=msrB PE=4 SV=1	0.770819	Id.	0.139797		Genetic information processing
Q3ZVU7	cbdbA1553	Transcriptional regulator, MarR family OS=Dehalococcoides mccartyi (strain CBDB1) GN=rdhR PE=4 SV=1	n.d.	Id.
Q3ZYI0	cbdbA1223	Transcriptional regulator, MerR family OS=Dehalococcoides mccartyi (strain CBDB1) GN=cbdbA1223 PE=4 SV=1	Id.	Id.
Q3ZXQ0	cbdbA898	Branched-chain amino acid ABC transporter,permease protein OS=Dehalococcoides mccartyi (strain CBDB1) GN=cbdbA898 PE=4 SV=1	Id.	Id.			Cellular community - prokaryotes; Membrane transport
Q3ZYM0	cbdbA1290	ABC transporter, permease protein OS=Dehalococcoides mccartyi (strain CBDB1) GN=cbdbA1290 PE=4 SV=1	Id.	1.1584		0.068143
Q3ZY03	cbdbA1002	Uncharacterized protein OS=Dehalococcoides mccartyi (strain CBDB1) GN=cbdbA1002 PE=4 SV=1	1.11144	Id.	0.0712607		Poorly characterized
Q3ZWD2	cbdbA52	SAM-dependent methyltransferase UbiE/COQ5 family OS=Dehalococcoides mccartyi (strain CBDB1) GN=cbdbA52 PE=4 SV=1	n.d.	1.05216		0.126278	Metabolism of cofactors and vitamins
Q3ZWL7	cbdbA157	Putative bacterial general secretion pathway protein H OS=Dehalococcoides mccartyi (strain CBDB1) GN=cbdbA157 PE=4 SV=1	n.d.	Id.
Q3ZZB0	cbdbA275	PolyA polymerase family protein OS=Dehalococcoides mccartyi (strain CBDB1) GN=cbdbA275 PE=3 SV=1	n.d.	0.997147		0.20858	Folding, sorting and degradation; Translation
Q3ZWP4	cbdbA212	Probable glycosyltransferase OS=Dehalococcoides mccartyi (strain CBDB1) GN=cbdbA212 PE=4 SV=1	1.40329	1.18997	0.082658	0.0792554
Q3ZYT5	cbdbA1322	Endoribonuclease YbeY OS=Dehalococcoides mccartyi (strain CBDB1) GN=ybeY PE=3 SV=1	1.88265	1.74971	0.0476806	0.0135037	Translation
Q3ZZF3	cbdbA347	Thiamine-monophosphate kinase OS=Dehalococcoides mccartyi (strain CBDB1) GN=thiL PE=3 SV=1	Id.	1.34045		0.0739855	Metabolism of cofactors and vitamins
Q3ZXK9	cbdbA835	ABC transporter, permease protein OS=Dehalococcoides mccartyi (strain CBDB1) GN=cbdbA835 PE=4 SV=1	Id.	1.32101		0.0247744	Membrane transport
Q3ZXU5	cbdbA945	tRNA pseudouridine synthase B OS=Dehalococcoides mccartyi (strain CBDB1) GN=truB PE=3 SV=1	n.d.	Id.			Translation
Q3ZYD7	cbdbA1149	Uncharacterized protein OS=Dehalococcoides mccartyi (strain CBDB1) GN=cbdbA1149 PE=4 SV=1	1.37591	1.48154	0.0796715	0.07595
Q3ZYA3	cbdbA1134	UvrABC system protein C OS=Dehalococcoides mccartyi (strain CBDB1) GN=uvrC PE=3 SV=1	0.940726	n.d.	0.036972		Replication and repair
Q3ZZK3	cbdbA401	Holo-[acyl-carrier-protein] synthase OS=Dehalococcoides mccartyi (strain CBDB1) GN=acpS PE=3 SV=1	n.d.	1.58267		0.0216866	Metabolism of cofactors and vitamins
Q3ZWS4	cbdbA240	DNA-binding response regulator OS=Dehalococcoides mccartyi (strain CBDB1) GN=rdhD PE=4 SV=1	n.d.	1.40884		0.107905	Cellular community - prokaryotes; Signal transduction
Q3ZZ71	cbdbA1527	Uncharacterized protein OS=Dehalococcoides mccartyi (strain CBDB1) GN=cbdbA1527 PE=4 SV=1	Id.	n.d.
Q3ZYX7	cbdbA1383	Uncharacterized protein OS=Dehalococcoides mccartyi (strain CBDB1) GN=cbdbA1383 PE=4 SV=1	Id.	n.d.
Q3ZZS7	cbdbA489	Uncharacterized protein OS=Dehalococcoides mccartyi (strain CBDB1) GN=cbdbA489 PE=4 SV=1	n.d.	0.824362		0.442586
Q3ZWW8	cbdbA566	Uncharacterized protein OS=Dehalococcoides mccartyi (strain CBDB1) GN=cbdbA566 PE=4 SV=1	n.d.	1.96066		0.0782187
Q3ZWI4	cbdbB7	Uncharacterized protein OS=Dehalococcoides mccartyi (strain CBDB1) GN=cbdbA103.1 PE=4 SV=1	1.45784	1.39152	0.0715391	0.0156658
Q3ZY56	cbdbA1081	Transcriptional regulator, Fur family OS=Dehalococcoides mccartyi (strain CBDB1) GN=cbdbA1081 PE=4 SV=1	n.d.	Id.			Transcription
Q3ZYJ4	cbdbA1264	Acetyltransferase, GNAT family OS=Dehalococcoides mccartyi (strain CBDB1) GN=cbdbA1264 PE=4 SV=1	Id.	n.d.
Q3ZXF9	cbdbA782	Pantothenate synthetase OS=Dehalococcoides mccartyi (strain CBDB1) GN=panC PE=3 SV=1	1.24181	0.948462	0.383349	0.175347	Metabolism of cofactors and vitamins; Metabolism of other amino acids
Q3ZXW8	cbdbA966	Transcriptional regulator, ArsR family OS=Dehalococcoides mccartyi (strain CBDB1) GN=cbdbA966 PE=4 SV=1	Id.	1.10479		0.272523	Transcription
Q3ZVY5	cbdbA1590	Sensor histidine kinase OS=Dehalococcoides mccartyi (strain CBDB1) GN=rdhC PE=4 SV=1	0.781573	n.d.	0.310674
Q3ZWY7	cbdbA542	Endonuclease V OS=Dehalococcoides mccartyi (strain CBDB1) GN=nfi PE=3 SV=1	n.d.	Id.			Replication and repair
Q3ZXB2	cbdbA729	Uncharacterized protein OS=Dehalococcoides mccartyi (strain CBDB1) GN=cbdbA729 PE=4 SV=1	n.d.	1.26729		0.0333136
Q3ZZB4	cbdbA331	Ribosomal RNA small subunit methyltransferase I OS=Dehalococcoides mccartyi (strain CBDB1) GN=rsmI PE=3 SV=1	n.d.	Id.			Translation
Q3ZX76	cbdbA673	Tyrosine recombinase XerC OS=Dehalococcoides mccartyi (strain CBDB1) GN=xerC PE=3 SV=1	Id.	Id.
Q3ZW46	cbdbA1665	Uncharacterized protein OS=Dehalococcoides mccartyi (strain CBDB1) GN=cbdbA1665 PE=4 SV=1	1.23372	1.67643	0.725008	0.316392
Q3ZY64	cbdbA1072	Uncharacterized protein OS=Dehalococcoides mccartyi (strain CBDB1) GN=cbdbA1072 PE=4 SV=1	1.05481	1.46738	0.0113462	0.11279	Poorly characterized
Q3ZYQ5	cbdbA1304	Type II secretion system protein, GspI OS=Dehalococcoides mccartyi (strain CBDB1) GN=cbdbA1304 PE=4 SV=1	1.30117	Id.	0.0921318
Q3ZZW2	cbdbA1740	LexA repressor OS=Dehalococcoides mccartyi (strain CBDB1) GN=lexA PE=3 SV=1	1.10735	Id.	0.149257		Enzyme families; Replication and repair
Q3ZW77	cbdbA1707	Uncharacterized protein OS=Dehalococcoides mccartyi (strain CBDB1) GN=cbdbA1707 PE=4 SV=1	n.d.	0.966821		0.214574
Q3ZWJ8	cbdbA150	Uncharacterized protein OS=Dehalococcoides mccartyi (strain CBDB1) GN=cbdbA150 PE=4 SV=1	n.d.	Id.
Q3ZXE8	cbdbA740	Conserved membrane protein OS=Dehalococcoides mccartyi (strain CBDB1) GN=cbdbA740 PE=4 SV=1	1.88827	1.6504	0.210951	0.236375
Q3ZXR9	cbdbA876	Proton-translocating NADH-quinone oxidoreductase, C subunit OS=Dehalococcoides mccartyi (strain CBDB1) GN=nuoC PE=4 SV=1	Id.	1.45145		0.165697	Energy metabolism
Q3ZZ31	cbdbA1479	SsrA-binding protein OS=Dehalococcoides mccartyi (strain CBDB1) GN=smpB PE=3 SV=1	n.d.	Id.			Genetic information processing;
Q3ZX16	cbdbA626	Putative cyclase OS=Dehalococcoides mccartyi (strain CBDB1) GN=cbdbA626 PE=4 SV=1	1.10925	Id.	0.0534689		Amino acid metabolism; Carbohydrate metabolism
Q3ZY22	cbdbA1009	Serine protease, DegP OS=Dehalococcoides mccartyi (strain CBDB1) GN=cbdbA1009 PE=4 SV=1	2.22717	1.98344	0.042251	0.142803
Q3ZXS1	cbdbA874	NADH-quinone oxidoreductase subunit A OS=Dehalococcoides mccartyi (strain CBDB1) GN=nuoA PE=3 SV=1	1.80907	1.88818	0.0903892	0.0366946	Energy metabolism
Q3ZWK8	cbdbA138	DJ-1 family protein OS=Dehalococcoides mccartyi (strain CBDB1) GN=cbdbA138 PE=4 SV=1	Id.	n.d.			Enzyme families
Q3ZZI1	cbdbA370	Amino acid ABC transporter, permease protein OS=Dehalococcoides mccartyi (strain CBDB1) GN=cbdbA370 PE=3 SV=1	n.d.	1.52246		0.408028	Membrane transport
Q3ZYS6	cbdbA1333	Auxin-responsive GH3 protein homolog OS=Dehalococcoides mccartyi (strain CBDB1) GN=cbdbA1333 PE=4 SV=1	Id.	n.d.
Q3ZXP0	cbdbA855	Transcriptional regulator, MarR family OS=Dehalococcoides mccartyi (strain CBDB1) GN=rdhR PE=4 SV=1	Id.	1.40458		0.03661
Q3ZXK2	cbdbA843	Hydrogenase, EchB subunit OS=Dehalococcoides mccartyi (strain CBDB1) GN=echB PE=3 SV=1	2.00833	2.23622	0.0263048	0.0944905
Q3ZYZ0	cbdbA1421	2'-5' RNA ligase family protein OS=Dehalococcoides mccartyi (strain CBDB1) GN=cbdbA1421 PE=4 SV=1	Id.	n.d.			Translation
Q3ZXF8	cbdbA783	Major facilitator family transporter OS=Dehalococcoides mccartyi (strain CBDB1) GN=cbdbA783 PE=4 SV=1	1.50954	1.00294	0.095329	0.280979
Q3ZXY7	cbdbA998	Acylphosphatase OS=Dehalococcoides mccartyi (strain CBDB1) GN=acyP PE=3 SV=1	n.d.	1.30369		0.197189	Carbohydrate metabolism; Xenobiotics biodegradation and metabolism
Q3ZWV8	cbdbA255	Uncharacterized protein OS=Dehalococcoides mccartyi (strain CBDB1) GN=cbdbA255 PE=4 SV=1	n.d.	Id.
Q3ZW79	cbdbA1705	Glycerol-3-phosphate acyltransferase 4 OS=Dehalococcoides mccartyi (strain CBDB1) GN=plsY4 PE=3 SV=1	1.5413	Id.	0.183986		Lipid metabolism
Q3ZYR3	cbdbA1350	Uncharacterized protein OS=Dehalococcoides mccartyi (strain CBDB1) GN=cbdbA1350 PE=4 SV=1	n.d.	Id.
Q3ZZ68	cbdbA1488	Methyltransferase OS=Dehalococcoides mccartyi (strain CBDB1) GN=cbdbA1488 PE=4 SV=1	Id.	Id.			Replication and repair; Transport and catabolism
Q3ZY38	cbdbA1046	Maf-like protein cbdbA1046 OS=Dehalococcoides mccartyi (strain CBDB1) GN=cbdbA1046 PE=3 SV=1	n.d.	Id.			Cellular processes and signaling
Q3ZYC8	cbdbA1161	Peptide methionine sulfoxide reductase MsrA OS=Dehalococcoides mccartyi (strain CBDB1) GN=msrA PE=3 SV=1	n.d.	1.10255		0.0695555	Genetic information processing
Q3ZX74	cbdbA675	Putative DNA processing protein DprA OS=Dehalococcoides mccartyi (strain CBDB1) GN=cbdbA675 PE=4 SV=1	n.d.	0.9584		0.0845312	Genetic information processing;
Q3ZXD5	cbdbA757	UPF0102 protein cbdbA757 OS=Dehalococcoides mccartyi (strain CBDB1) GN=cbdbA757 PE=3 SV=1	n.d.	1.18522		0.278463	Genetic information processing
Q3ZWP6	cbdbA208	Putative ferredoxin-thioredoxin reductase,catalyticsubunit OS=Dehalococcoides mccartyi (strain CBDB1) GN=cbdbA208 PE=4 SV=1	Id.	n.d.
Q3ZZ86	cbdbA1512	Sensor histidine kinase OS=Dehalococcoides mccartyi (strain CBDB1) GN=cbdbA1512 PE=4 SV=1	Id.	n.d.
Q3ZWL1	cbdbA134	ABC transporter, permease protein OS=Dehalococcoides mccartyi (strain CBDB1) GN=cbdbA134 PE=4 SV=1	1.55888	1.60837	0.191063	0.188398	Membrane transport
Q3ZW21	cbdbA1607	Conserved hypothetical membrane protein OS=Dehalococcoides mccartyi (strain CBDB1) GN=cbdbA1607 PE=4 SV=1	Id.	n.d.			Poorly characterized
Q3ZW27	cbdbA1659	Hydrogenase, HycC subunit OS=Dehalococcoides mccartyi (strain CBDB1) GN=hycC PE=4 SV=1	Id.	Id.			Metabolism
Q3ZWT2	cbdbA229	Uncharacterized protein OS=Dehalococcoides mccartyi (strain CBDB1) GN=cbdbA229 PE=4 SV=1	2.08573	1.79769	0.0844115	0.00462683
Q3ZW51	cbdbA1690	Putative membrane bound regulatory protein,CprC OS=Dehalococcoides mccartyi (strain CBDB1) GN=cbdbA1690 PE=4 SV=1	n.d.	Id.
Q3ZW42	cbdbA1641	Preprotein translocase, SecG subunit OS=Dehalococcoides mccartyi (strain CBDB1) GN=secG PE=4 SV=1	n.d.	1.21922		0.0159963	Cellular community - prokaryotes; Folding, sorting and degradation; Membrane transport
Q3ZXR7	cbdbA879	NADH-quinone oxidoreductase subunit H OS=Dehalococcoides mccartyi (strain CBDB1) GN=nuoH PE=3 SV=1	n.d.	1.14401		0.111559	Energy metabolism
Q3ZXR1	cbdbA885	NADH-quinone oxidoreductase subunit N OS=Dehalococcoides mccartyi (strain CBDB1) GN=nuoN PE=3 SV=1	Id.	n.d.			Energy metabolism
Q3ZWA8	cbdbA17	Putative lipoprotein OS=Dehalococcoides mccartyi (strain CBDB1) GN=cbdbA17 PE=4 SV=1	n.d.	Id.
Q3ZW07	cbdbA1622	Transcriptional regulator, MarR family OS=Dehalococcoides mccartyi (strain CBDB1) GN=rdhR PE=4 SV=1	n.d.	Id.
Q3ZX64	cbdbA661	Uncharacterized protein OS=Dehalococcoides mccartyi (strain CBDB1) GN=cbdbA661 PE=4 SV=1	n.d.	Id.
Q3ZXU6	cbdbA944	Uncharacterized protein OS=Dehalococcoides mccartyi (strain CBDB1) GN=cbdbA944 PE=4 SV=1	2.88641	2.91708	0.259557	0.0936621
Q3ZXF4	cbdbA734	Hypothetical membrane protein OS=Dehalococcoides mccartyi (strain CBDB1) GN=cbdbA734 PE=4 SV=1	1.47908	n.d.	0.0437087
Q3ZWB7	cbdbA39	Cation efflux family protein OS=Dehalococcoides mccartyi (strain CBDB1) GN=cbdbA39 PE=4 SV=1	1.10689	n.d.	0.0574131		Membrane transport
Q3ZWL9	cbdbB9	Hypothetical membrane protein OS=Dehalococcoides mccartyi (strain CBDB1) GN=cbdbA183.1 PE=4 SV=1	n.d.	Id.
Q3ZXG2	cbdbA779	Uncharacterized protein OS=Dehalococcoides mccartyi (strain CBDB1) GN=cbdbA779 PE=4 SV=1	1.07398	n.d.	0.222092
Q3ZZ05	cbdbA1456	Transcriptional regulator, MarR family OS=Dehalococcoides mccartyi (strain CBDB1) GN=rdhR PE=4 SV=1	1.05149	n.d.	0.133902
Q3ZXU9	cbdbA940	CDP-alcohol phosphatidyltransferase family protein OS=Dehalococcoides mccartyi (strain CBDB1) GN=cbdbA940 PE=3 SV=1	1.62558	n.d.	0.250572		Lipid metabolism
Q3ZYQ3	cbdbA1306	Uncharacterized protein OS=Dehalococcoides mccartyi (strain CBDB1) GN=cbdbA1306 PE=4 SV=1	1.98976	1.63177	0.0491736	0.108563
Q3ZZ39	cbdbA1469	Putative fluoride ion transporter CrcB OS=Dehalococcoides mccartyi (strain CBDB1) GN=crcB PE=3 SV=1	n.d.	Id.			Poorly characterized
Q3ZX53	cbdbA642	Adenosylcobinamide-GDP ribazoletransferase OS=Dehalococcoides mccartyi (strain CBDB1) GN=cobS PE=3 SV=1	n.d.	1.02674		0.060202	Metabolism of cofactors and vitamins
Q3ZYT1	cbdbA1327	Lipoprotein signal peptidase OS=Dehalococcoides mccartyi (strain CBDB1) GN=lspA PE=3 SV=1	n.d.	1.4959		0.0753041	Enzyme families; Folding, sorting and degradation
Q3ZYJ7	cbdbA1259	Uncharacterized protein OS=Dehalococcoides mccartyi (strain CBDB1) GN=cbdbA1259 PE=4 SV=1	n.d.	Id.
Q3ZZH5	cbdbA376	Conserved hypothetical membrane protein OS=Dehalococcoides mccartyi (strain CBDB1) GN=cbdbA376 PE=4 SV=1	Id.	n.d.			Poorly characterized
Q3ZYP5	cbdbA1315	Uncharacterized protein OS=Dehalococcoides mccartyi (strain CBDB1) GN=cbdbA1315 PE=4 SV=1	Id.	n.d.
Q3ZWG9	cbdbA123	Uncharacterized protein OS=Dehalococcoides mccartyi (strain CBDB1) GN=cbdbA123 PE=4 SV=1	Id.	n.d.
Q3ZXL4	cbdbA830	Conserved domain protein OS=Dehalococcoides mccartyi (strain CBDB1) GN=cbdbA830 PE=4 SV=1	1.64714	n.d.	0.131852
Q3ZXK8	cbdbA837	Uncharacterized protein OS=Dehalococcoides mccartyi (strain CBDB1) GN=cbdbA837 PE=4 SV=1	2.93691	2.70191	0.0687363	0.0131725
Q3ZZC5	cbdbA316	Isoprenyl transferase OS=Dehalococcoides mccartyi (strain CBDB1) GN=uppS PE=3 SV=1	n.d.	Id.			Metabolism of terpenoids and polyketides
		number of identified and quantified proteins:	948	1015

## Sheet: B
Master Protein Accessions	locus tag	Description	Pathway	Annotated Sequence	Modifications in Master Proteins	Positions in Master Proteins	estimated log10 acetylation abundance ratio (average)		standard deviation
							Kac-eluate		Kac-eluate
							exp	stat	exp	stat
Q3ZVZ8	cbdbA1635	Uncharacterized protein OS=Dehalococcoides mccartyi (strain CBDB1) GN=cbdbA1635 PE=4 SV=1		[K].ANQSLTAKFVKEETYQGLTVYVFQVDQK.[N]	Q3ZVZ8 1xAcetyl [K]	Q3ZVZ8 [143-170]	n.d	n.d
Q3ZW01	cbdbA1629	Sensor histidine kinase OS=Dehalococcoides mccartyi (strain CBDB1) GN=rdhC PE=4 SV=1		[K].QVILNLLDNAAKYTPWGGNISLTAGINHNNLEVEVK.[D]	Q3ZW01 1xAcetyl [K297]	Q3ZW01 [286-321]	id.	n.d
Q3ZW48	cbdbA1694	Twin-arginine translocation protein, TatA OS=Dehalococcoides mccartyi (strain CBDB1) GN=E PE=4 SV=1	Folding, sorting and degradation; Membrane transport	[K].KLEDDAVSAKINEK.[I]	Q3ZW48 1xAcetyl [K66]	Q3ZW48 [57-70]	n.d	-0.664924		0.137762
Q3ZW67	cbdbA1669	Peroxiredoxin OS=Dehalococcoides mccartyi (strain CBDB1) GN=cbdbA1669 PE=3 SV=1	Cell growth and death; Transport and catabolism	[K].TGIKIPFPIIADLNKEVSSAYGMLHPGQSK.[T]	Q3ZW67 1xAcetyl [K107]	Q3ZW67 [93-122]	n.d	n.d
Q3ZW82	cbdbA1702	Ribonuclease Y OS=Dehalococcoides mccartyi (strain CBDB1) GN=rny PE=3 SV=1	Folding, sorting and degradation; Translation	[R].VIQKTEALDR.[K]	Q3ZW82 1xAcetyl [K108]	Q3ZW82 [105-114]	n.d	-1.94147		0.0684567
Q3ZW84	cbdbA1700	Protein RecA OS=Dehalococcoides mccartyi (strain CBDB1) GN=recA PE=3 SV=1	Replication and repair	[K].GSIMKLSDPSFR.[Q]	Q3ZW84 1xAcetyl [K27]	Q3ZW84 [23-34]	-2.06366	-1.23602	0.354994	0.0464837
Q3ZW87	cbdbA4	DNA gyrase subunit B OS=Dehalococcoides mccartyi (strain CBDB1) GN=gyrB PE=3 SV=1	Replication and repair	[K].STKVDIQR.[Y]	Q3ZW87 1xAcetyl [K571]	Q3ZW87 [569-576]	-0.8433	-1.11586	0.355035	0.142695
Q3ZWB9	cbdbA70	ATP-dependent Clp protease, ATP-binding subunit OS=Dehalococcoides mccartyi (strain CBDB1) GN=clpC PE=3 SV=1	Folding, sorting and degradation	[R].DKEAALATQQYDYASELRER.[E]	Q3ZWB9 1xAcetyl [K429]	Q3ZWB9 [428-447]	id.	id.
Q3ZWE1	cbdbA74	2-C-methyl-D-erythritol 4-phosphate cytidylyltransferase OS=Dehalococcoides mccartyi (strain CBDB1) GN=ispD PE=3 SV=1	Metabolism of terpenoids and polyketides	[K].LCGSAIAAVPLKDTIKEISPEGLVEK.[T]	Q3ZWE1 1xAcetyl [K138]	Q3ZWE1 [127-152]	n.d	-0.0677104		0.138273
Q3ZWF5	cbdbA84	Putative reductive dehalogenase OS=Dehalococcoides mccartyi (strain CBDB1) GN=rdhA PE=4 SV=1		[R].IISWGDVEEPVNTPGILWPGNKLGSLVLPNK.[C]	Q3ZWF5 1xAcetyl [K236]	Q3ZWF5 [215-245]	n.d	n.d
Q3ZWG0	cbdbA80	Putative reductive dehalogenase OS=Dehalococcoides mccartyi (strain CBDB1) GN=rdhA PE=4 SV=1		[R].FCHTCLKCADACPGNALQK.[N]	Q3ZWG0 1xAcetyl [K365]	Q3ZWG0 [359-377]	id.	-2.85626		0.0117888
Q3ZWG0	cbdbA80	Putative reductive dehalogenase OS=Dehalococcoides mccartyi (strain CBDB1) GN=rdhA PE=4 SV=1		[K].NREPSWDITPKYDEYVKPELFNSPGHK.[T]	Q3ZWG0 1xAcetyl [K394]	Q3ZWG0 [378-404]	id.	id.
Q3ZWG0	cbdbA80	Putative reductive dehalogenase OS=Dehalococcoides mccartyi (strain CBDB1) GN=rdhA PE=4 SV=1		[K].EKLQSIHEFVKPVIGQTSLFNSFFYNMDR.[A]	Q3ZWG0 1xAcetyl [K]	Q3ZWG0 [436-464]	n.d	id.
Q3ZWK4	cbdbA143	Pyridine nucleotide-disulphide oxidoreductase family protein OS=Dehalococcoides mccartyi (strain CBDB1) GN=cbdbA143 PE=4 SV=1		[K].QAGGDKVEIEK.[T]	Q3ZWK4 1xAcetyl [K495]	Q3ZWK4 [490-500]	n.d	-2.31677		0.0824286
Q3ZWM9	cbdbA171	Putative [Fe] hydrogenase, large subunit HymC OS=Dehalococcoides mccartyi (strain CBDB1) GN=hymC PE=4 SV=1	Metabolism	[K].IYADYLEKPLGKR.[S]	Q3ZWM9 1xAcetyl [K557]	Q3ZWM9 [546-558]	n.d	-1.78062		0.0514379
Q3ZWQ7	cbdbA195	Formate dehydrogenase, major subunit OS=Dehalococcoides mccartyi (strain CBDB1) GN=OmeA PE=4 SV=1	Carbohydrate metabolism; Energy metabolism	[R].NAMTNSWTDVSNANVILDMGGNPAENYPACFSHLGEAMGK.[G]	Q3ZWQ7 1xAcetyl [K247]	Q3ZWQ7 [208-247]	id.	n.d
Q3ZWW5	cbdbA541	UPF0109 protein cbdbA541 OS=Dehalococcoides mccartyi (strain CBDB1) GN=cbdbA541 PE=3 SV=1	Poorly characterized	[K].VADVDKGR.[I]	Q3ZWW5 1xAcetyl [K41]	Q3ZWW5 [36-43]	-2.5841	n.d	0.0596381
Q3ZWW6	cbdbA568	GTPase domain protein OS=Dehalococcoides mccartyi (strain CBDB1) GN=cbdbA568 PE=4 SV=1		[R].STSMMPIIKQR.[Q]	Q3ZWW6 1xAcetyl [K367]	Q3ZWW6 [359-369]	-2.63677	id.	0.0997583
Q3ZWW6	cbdbA568	GTPase domain protein OS=Dehalococcoides mccartyi (strain CBDB1) GN=cbdbA568 PE=4 SV=1		[R].TLTLPFDKTDHFR.[M]	Q3ZWW6 1xAcetyl [K256]	Q3ZWW6 [249-261]	n.d	-1.95996		0.0717694
Q3ZWW6	cbdbA568	GTPase domain protein OS=Dehalococcoides mccartyi (strain CBDB1) GN=cbdbA568 PE=4 SV=1		[K].NAKYIGAK.[T]	Q3ZWW6 1xAcetyl [K218]	Q3ZWW6 [216-223]	n.d	id.
Q3ZWY9	cbdbA569	Glyceraldehyde-3-phosphate dehydrogenase, typeI OS=Dehalococcoides mccartyi (strain CBDB1) GN=gap PE=3 SV=1	Carbohydrate metabolism; Energy metabolism; Signal transduction; Transport and catabolism	[R].LGDLIAYIAKK.[-]	Q3ZWY9 1xAcetyl [K]	Q3ZWY9 [325-335]	n.d	-1.45898		0.0718766
Q3ZWY9	cbdbA569	Glyceraldehyde-3-phosphate dehydrogenase, typeI OS=Dehalococcoides mccartyi (strain CBDB1) GN=gap PE=3 SV=1	Carbohydrate metabolism; Energy metabolism; Signal transduction; Transport and catabolism	[R].GELEVVAVNDLADNKSNAHLLK.[W]	Q3ZWY9 1xAcetyl [K41]	Q3ZWY9 [27-48]	n.d	id.
Q3ZWY9	cbdbA569	Glyceraldehyde-3-phosphate dehydrogenase, typeI OS=Dehalococcoides mccartyi (strain CBDB1) GN=gap PE=3 SV=1	Carbohydrate metabolism; Energy metabolism; Signal transduction; Transport and catabolism	[K].IQDMFHKDIR.[R]	Q3ZWY9 1xAcetyl [K195]	Q3ZWY9 [189-198]	n.d	-1.82181		0.152634
Q3ZWZ1	cbdbA597	Hydrogenase, group 3, VhuA subunit OS=Dehalococcoides mccartyi (strain CBDB1) GN=cbdbA597 PE=3 SV=1	Metabolism	[R].GTLIHDYTTDENGLVTDANLVVATVMNNAAINMSVK.[Q]	Q3ZWZ1 1xAcetyl [K418]	Q3ZWZ1 [383-418]	n.d	n.d
Q3ZWZ2	cbdbA596	Hydrogenase, group 3, VhuG subunit OS=Dehalococcoides mccartyi (strain CBDB1) GN=cbdbA596 PE=4 SV=1	Metabolism	[K].QSTGGPIKR.[S]	Q3ZWZ2 1xAcetyl [K203]	Q3ZWZ2 [196-204]	n.d	-2.54972		0.0731
Q3ZWZ6	cbdbA592	Uncharacterized protein OS=Dehalococcoides mccartyi (strain CBDB1) GN=cbdbA592 PE=4 SV=1		[R].GAVKLCEPIDEMEFER.[L]	Q3ZWZ6 1xAcetyl [K46]	Q3ZWZ6 [43-58]	n.d	id.
Q3ZX01	cbdbA586	DNA-directed RNA polymerase subunit beta OS=Dehalococcoides mccartyi (strain CBDB1) GN=rpoB PE=3 SV=1	Nucleotide metabolism; Replication and repair; Transcription	[K].QQGFDGKK.[I]	Q3ZX01 1xAcetyl [K1013]	Q3ZX01 [1007-1014]	n.d	n.d
Q3ZX04	cbdbA581	Soluble hydrogenase, tritium exchange subunit OS=Dehalococcoides mccartyi (strain CBDB1) GN=cbdbA581 PE=3 SV=1		[R].FYWDLAKHK.[A]	Q3ZX04 1xAcetyl [K]	Q3ZX04 [217-225]	id.	-1.2798		0.0772875
Q3ZX04	cbdbA581	Soluble hydrogenase, tritium exchange subunit OS=Dehalococcoides mccartyi (strain CBDB1) GN=cbdbA581 PE=3 SV=1		[K].AADPALVKK.[A]	Q3ZX04 1xAcetyl [K118]	Q3ZX04 [111-119]	n.d	id.
Q3ZX05	cbdbA580	D-3-phosphoglycerate dehydrogenase OS=Dehalococcoides mccartyi (strain CBDB1) GN=serA PE=3 SV=1	Amino acid metabolism; Energy metabolism; Transport and catabolism	[R].GGIIDEEALAKAVK.[E]	Q3ZX05 1xAcetyl [K241]	Q3ZX05 [231-244]	n.d	id.
Q3ZX07	cbdbA578	Uncharacterized protein OS=Dehalococcoides mccartyi (strain CBDB1) GN=cbdbA578 PE=4 SV=1		[R].FESEAIAKK.[-]	Q3ZX07 1xAcetyl [K]	Q3ZX07 [434-442]	n.d	-2.20051		0.15641
Q3ZX19	cbdbA623	Cell division protein ftsA OS=Dehalococcoides mccartyi (strain CBDB1) GN=ftsA PE=3 SV=1	Cell growth and death; Cell motility; Replication and repair	[K].SHPTTEESAKGGFISR.[M]	Q3ZX19 1xAcetyl [K387]	Q3ZX19 [378-393]	id.	n.d
Q3ZX44	cbdbA654	Carbon monoxide dehydrogenase/acetyl-CoA synthase small subunit OS=Dehalococcoides mccartyi (strain CBDB1) GN=acsD PE=4 SV=1	Energy metabolism	[K].IPETESPELGNTEKR.[A]	Q3ZX44 1xAcetyl [K273]	Q3ZX44 [260-274]	id.	n.d
Q3ZX50	cbdbA645	Thioredoxin OS=Dehalococcoides mccartyi (strain CBDB1) GN=trx PE=3 SV=1	Folding, sorting and degradation;	[K].FCKLNVDENKTTATQYR.[V]	Q3ZX50 1xAcetyl [K55]	Q3ZX50 [53-69]	n.d	-2.26852		0.0892972
Q3ZX65	cbdbA685	Putative [Fe] hydrogenase, HymC subunit OS=Dehalococcoides mccartyi (strain CBDB1) GN=hymC PE=4 SV=1		[R].EVALPYYEDKTDCIACGSCAYICPTGAIK.[M]	Q3ZX65 1xAcetyl [K163]	Q3ZX65 [154-182]	n.d	-1.46145		0.152735
Q3ZX65	cbdbA685	Putative [Fe] hydrogenase, HymC subunit OS=Dehalococcoides mccartyi (strain CBDB1) GN=hymC PE=4 SV=1		[K].CGAEWIPEKQIK.[H]	Q3ZX65 1xAcetyl [K217]	Q3ZX65 [209-220]	n.d	id.
Q3ZX68	cbdbA682	Pyruvic-ferredoxin oxidoreductase, beta subunit OS=Dehalococcoides mccartyi (strain CBDB1) GN=porB PE=4 SV=1	Carbohydrate metabolism; Energy metabolism; Xenobiotics biodegradation and metabolism	[R].AACALKLEK.[-]	Q3ZX68 1xAcetyl [K310]	Q3ZX68 [305-313]	n.d	-2.15592		0.0963994
Q3ZX69	cbdbA681	Pyruvic-ferredoxin oxidoreductase, alpha subunit OS=Dehalococcoides mccartyi (strain CBDB1) GN=porA PE=4 SV=1	Carbohydrate metabolism; Energy metabolism; Xenobiotics biodegradation and metabolism	[K].KGLAIAEKGSPNEYEIYGVRA.[-]	Q3ZX69 1xAcetyl [K377]	Q3ZX69 [370-390]	n.d	id.
Q3ZX71	cbdbB16	Pyruvic-ferredoxin oxidoreductase, gammasubunit OS=Dehalococcoides mccartyi (strain CBDB1) GN=porG PE=4 SV=1	Carbohydrate metabolism; Energy metabolism; Xenobiotics biodegradation and metabolism	[K].ATGLADMEAFEEPLKHR.[F]	Q3ZX71 1xAcetyl [K161]	Q3ZX71 [147-163]	n.d	id.
Q3ZX71	cbdbB16	Pyruvic-ferredoxin oxidoreductase, gammasubunit OS=Dehalococcoides mccartyi (strain CBDB1) GN=porG PE=4 SV=1	Carbohydrate metabolism; Energy metabolism; Xenobiotics biodegradation and metabolism	[R].FGKLAAK.[N]	Q3ZX71 1xAcetyl [K166]	Q3ZX71 [164-170]	id.	-0.948284		0.176791
Q3ZXA5	cbdbA688	Conserved domain protein OS=Dehalococcoides mccartyi (strain CBDB1) GN=cbdbA688 PE=4 SV=1		[K].VAENKIKDPDPLKK.[W]	Q3ZXA5 1xAcetyl [K82]	Q3ZXA5 [73-86]	id.	-1.99477		0.145048
Q3ZXA5	cbdbA688	Conserved domain protein OS=Dehalococcoides mccartyi (strain CBDB1) GN=cbdbA688 PE=4 SV=1		[K].MWISEQKVAENK.[I]	Q3ZXA5 1xAcetyl [K72]	Q3ZXA5 [66-77]	n.d	id.
Q3ZXA5	cbdbA688	Conserved domain protein OS=Dehalococcoides mccartyi (strain CBDB1) GN=cbdbA688 PE=4 SV=1		[R].KDSANEKMWISEQK.[V]	Q3ZXA5 1xAcetyl [K65]	Q3ZXA5 [59-72]	-2.51486	id.	0.243712
Q3ZXA5	cbdbA688	Conserved domain protein OS=Dehalococcoides mccartyi (strain CBDB1) GN=cbdbA688 PE=4 SV=1		[K].IKDPDPLKKWREER.[E]	Q3ZXA5 1xAcetyl [K85 or K86]	Q3ZXA5 [78-91]	n.d	id.
Q3ZXB2	cbdbA729	Uncharacterized protein OS=Dehalococcoides mccartyi (strain CBDB1) GN=cbdbA729 PE=4 SV=1		[K].KQMEKLMVELEMEKPR.[Y]	Q3ZXB2 3xAcetyl [K82; K86; K95]	Q3ZXB2 [82-97]	id.	n.d
Q3ZXB3	cbdbA728	Uncharacterized protein OS=Dehalococcoides mccartyi (strain CBDB1) GN=cbdbA728 PE=4 SV=1		[-].MENKSPALGQHVDQPGPK.[I]	Q3ZXB3 1xAcetyl [K4]	Q3ZXB3 [1-18]	n.d	id.
Q3ZXB4	cbdbA727	Uncharacterized protein OS=Dehalococcoides mccartyi (strain CBDB1) GN=cbdbA727 PE=4 SV=1		[R].SAEDFAKISR.[S]	Q3ZXB4 1xAcetyl [K747]	Q3ZXB4 [741-750]	n.d	id.
Q3ZXB4	cbdbA727	Uncharacterized protein OS=Dehalococcoides mccartyi (strain CBDB1) GN=cbdbA727 PE=4 SV=1		[R].LAGEKAAETATR.[A]	Q3ZXB4 1xAcetyl [K79]	Q3ZXB4 [75-86]	n.d	id.
Q3ZXB4	cbdbA727	Uncharacterized protein OS=Dehalococcoides mccartyi (strain CBDB1) GN=cbdbA727 PE=4 SV=1		[K].TAKLATNAANEALK.[A]	Q3ZXB4 1xAcetyl [K100]	Q3ZXB4 [98-111]	n.d	-2.47814		0.0514191
Q3ZXB4	cbdbA727	Uncharacterized protein OS=Dehalococcoides mccartyi (strain CBDB1) GN=cbdbA727 PE=4 SV=1		[R].AAAEAAAAAEKTAK.[L]	Q3ZXB4 1xAcetyl [K]	Q3ZXB4 [87-100]	n.d	-2.50381		0.0271195
Q3ZXB4	cbdbA727	Uncharacterized protein OS=Dehalococcoides mccartyi (strain CBDB1) GN=cbdbA727 PE=4 SV=1		[K].AAKLAAEEATNRADEVALTAK.[E]	Q3ZXB4 1xAcetyl [K545]	Q3ZXB4 [543-563]	n.d	id.
Q3ZXB8	cbdbA723	50S ribosomal protein L20 OS=Dehalococcoides mccartyi (strain CBDB1) GN=rplT PE=3 SV=1	Translation	[K].VLADMAISDTVAFAAVAAKAAAAK.[A]	Q3ZXB8 1xAcetyl [K112]	Q3ZXB8 [94-117]	n.d	-2.24144		0.0713076
Q3ZXD3	cbdbA759	Translin family protein OS=Dehalococcoides mccartyi (strain CBDB1) GN=cbdbA759 PE=4 SV=1	Genetic information processing	[K].LEVFQSKLTR.[K]	Q3ZXD3 1xAcetyl [K204]	Q3ZXD3 [198-207]	n.d	id.
Q3ZXE6	cbdbA743	Transcription elongation factor GreA OS=Dehalococcoides mccartyi (strain CBDB1) GN=greA PE=3 SV=1	Transcription	[R].TSQNAVEKIPMTASGYK.[K]	Q3ZXE6 1xAcetyl [K17]	Q3ZXE6 [10-26]	-1.56174	-0.76223	0.251144	0.219534
Q3ZXI1	cbdbA812	Acetolactate synthase, small subunit OS=Dehalococcoides mccartyi (strain CBDB1) GN=ilvN PE=4 SV=1	Amino acid metabolism; Carbohydrate metabolism; Metabolism of cofactors and vitamins	[R].GGLATATELQSSKELK.[T]	Q3ZXI1 1xAcetyl [K]	Q3ZXI1 [160-175]	n.d	id.
Q3ZXI2	cbdbA811	Ketol-acid reductoisomerase OS=Dehalococcoides mccartyi (strain CBDB1) GN=ilvC PE=3 SV=1	Amino acid metabolism; Metabolism of cofactors and vitamins	[K].IYKDSIEQGLKPGK.[M]	Q3ZXI2 1xAcetyl [K91]	Q3ZXI2 [89-102]	n.d	n.d
Q3ZXI5	cbdbA806	3-isopropylmalate dehydratase large subunit OS=Dehalococcoides mccartyi (strain CBDB1) GN=leuC PE=3 SV=1	Amino acid metabolism; Biosynthesis of other secondary metabolites; Carbohydrate metabolism	[K].VPQTIKFNYSGKLPK.[W]	Q3ZXI5 1xAcetyl [K159]	Q3ZXI5 [154-168]	n.d	id.
Q3ZXI6	cbdbA805	3-isopropylmalate dehydratase small subunit OS=Dehalococcoides mccartyi (strain CBDB1) GN=leuD PE=3 SV=1	Amino acid metabolism; Carbohydrate metabolism	[K].GFVHKYGENVDTDAIIPAR.[Y]	Q3ZXI6 1xAcetyl [K8]	Q3ZXI6 [4-22]	n.d	id.
Q3ZXI8	cbdbA803	2-isopropylmalate synthase OS=Dehalococcoides mccartyi (strain CBDB1) GN=cbdbA803 PE=3 SV=1	Amino acid metabolism; Carbohydrate metabolism	[-].MQVKLYDTTLR.[D]	Q3ZXI8 1xAcetyl [K4]	Q3ZXI8 [1-11]	n.d	-1.28026		0.115089
Q3ZXJ6	cbdbA794	Iron-regulated ABC transporter, subunit SufB-related OS=Dehalococcoides mccartyi (strain CBDB1) GN=sufB PE=4 SV=1	Poorly characterized	[R].YTDNTEAHKYVNKPSELASEDKAR.[I]	Q3ZXJ6 1xAcetyl [K41]	Q3ZXJ6 [33-56]	id.	n.d
Q3ZXJ6	cbdbA794	Iron-regulated ABC transporter, subunit SufB-related OS=Dehalococcoides mccartyi (strain CBDB1) GN=sufB PE=4 SV=1	Poorly characterized	[R].SGTYIQMDNHPVHFSAQQDGIEIMSTSEAAK.[K]	Q3ZXJ6 1xAcetyl [K101]	Q3ZXJ6 [71-101]	id.	n.d
Q3ZXL9	cbdbA824	Imidazoleglycerol-phosphate dehydratase OS=Dehalococcoides mccartyi (strain CBDB1) GN=hisB PE=3 SV=1	Amino acid metabolism	[R].ALDKATSIDPR.[R]	Q3ZXL9 1xAcetyl [K175]	Q3ZXL9 [172-182]	n.d	-1.29555		0.120704
Q3ZXM1	cbdbA821	Adenylosuccinate lyase OS=Dehalococcoides mccartyi (strain CBDB1) GN=purB PE=3 SV=1	Amino acid metabolism; Nucleotide metabolism	[R].QQAYKMVQR.[N]	Q3ZXM1 1xAcetyl [K372]	Q3ZXM1 [368-376]	n.d	n.d
Q3ZXM1	cbdbA821	Adenylosuccinate lyase OS=Dehalococcoides mccartyi (strain CBDB1) GN=purB PE=3 SV=1	Amino acid metabolism; Nucleotide metabolism	[K].TECHEAEEPFEKGQTGSSAMPHK.[K]	Q3ZXM1 1xAcetyl [K256]	Q3ZXM1 [245-267]	n.d	n.d
Q3ZXQ5	cbdbA893	Uncharacterized protein OS=Dehalococcoides mccartyi (strain CBDB1) GN=cbdbA893 PE=4 SV=1		[K].KCGHSLKCEGPLCHR.[V]	Q3ZXQ5 1xAcetyl [K61]	Q3ZXQ5 [55-69]	n.d	n.d
Q3ZXT7	cbdbA903	Indolepyruvate ferredoxin oxidoreductase, beta subunit OS=Dehalococcoides mccartyi (strain CBDB1) GN=iorB PE=4 SV=1	Metabolism	[K].RLPPKLLEANLK.[A]	Q3ZXT7 1xAcetyl [K177]	Q3ZXT7 [173-184]	n.d	n.d
Q3ZXT9	cbdbA921	3-oxoacyl-[acyl-carrier-protein] synthase 2 OS=Dehalococcoides mccartyi (strain CBDB1) GN=fabF PE=3 SV=1	Lipid metabolism; Metabolism of cofactors and vitamins	[K].TAGIKPEAVDYINAHGTSTPLNDKMETNAIK.[V]	Q3ZXT9 1xAcetyl [K317]	Q3ZXT9 [294-324]	n.d	-1.27527		0.26488
Q3ZXU1	cbdbA949	N utilization substance protein A OS=Dehalococcoides mccartyi (strain CBDB1) GN=nusA PE=3 SV=1	Transcription; Translation	[K].AAGGDSVKLR.[F]	Q3ZXU1 1xAcetyl [K433]	Q3ZXU1 [426-435]	n.d	-1.85266		0.0886303
Q3ZXU7	cbdbA943	Myo-inositol-1-phosphate synthase family protein OS=Dehalococcoides mccartyi (strain CBDB1) GN=cbdbA943 PE=4 SV=1	Biosynthesis of other secondary metabolites; Carbohydrate metabolism	[K].YLSQIIQKAPGSTADIVK.[I]	Q3ZXU7 1xAcetyl [K110]	Q3ZXU7 [103-120]	n.d	-1.60761		0.14643
Q3ZXU7	cbdbA943	Myo-inositol-1-phosphate synthase family protein OS=Dehalococcoides mccartyi (strain CBDB1) GN=cbdbA943 PE=4 SV=1	Biosynthesis of other secondary metabolites; Carbohydrate metabolism	[K].KISKTNAVTSQLDYK.[L]	Q3ZXU7 1xAcetyl [K240]	Q3ZXU7 [237-251]	n.d	-2.44193		0.149343
Q3ZXU7	cbdbA943	Myo-inositol-1-phosphate synthase family protein OS=Dehalococcoides mccartyi (strain CBDB1) GN=cbdbA943 PE=4 SV=1	Biosynthesis of other secondary metabolites; Carbohydrate metabolism	[K].AKDTEFVPGLMHVNLGGYHVSDINFTAAFDIDKNK.[V]	Q3ZXU7 1xAcetyl [K29]	Q3ZXU7 [28-62]	n.d	id.
Q3ZXV0	cbdbA939	Adenylosuccinate synthetase OS=Dehalococcoides mccartyi (strain CBDB1) GN=purA PE=3 SV=1	Amino acid metabolism; Nucleotide metabolism	[R].IEKLIGCQMSAVCIGPSR.[E]	Q3ZXV0 1xAcetyl [K402]	Q3ZXV0 [400-417]	n.d	n.d
Q3ZXV0	cbdbA939	Adenylosuccinate synthetase OS=Dehalococcoides mccartyi (strain CBDB1) GN=purA PE=3 SV=1	Amino acid metabolism; Nucleotide metabolism	[K].IIKYFPANSGELAK.[C]	Q3ZXV0 1xAcetyl [K354]	Q3ZXV0 [352-365]	n.d	n.d
Q3ZXV1	cbdbA937	Acetyltransferase, GNAT family OS=Dehalococcoides mccartyi (strain CBDB1) GN=cbdbA937 PE=4 SV=1		[R].VDKISQTLR.[N]	Q3ZXV1 1xAcetyl [K114]	Q3ZXV1 [112-120]	id.	0.841048		0.407453
Q3ZXV3	cbdbA935	4-hydroxy-tetrahydrodipicolinate synthase OS=Dehalococcoides mccartyi (strain CBDB1) GN=dapA PE=3 SV=1	Amino acid metabolism; Biosynthesis of other secondary metabolites	[K].TIAEATKLPCILYNVPSR.[T]	Q3ZXV3 1xAcetyl [K129]	Q3ZXV3 [123-140]	id.	n.d
Q3ZXV6	cbdbA932	Polyribonucleotide nucleotidyltransferase OS=Dehalococcoides mccartyi (strain CBDB1) GN=pnp PE=3 SV=1	Folding, sorting and degradation; Nucleotide metabolism; Translation	[R].LTDRPLRPLLPKEWR.[N]	Q3ZXV6 1xAcetyl [K105]	Q3ZXV6 [94-108]	n.d	n.d
Q3ZXV6	cbdbA932	Polyribonucleotide nucleotidyltransferase OS=Dehalococcoides mccartyi (strain CBDB1) GN=pnp PE=3 SV=1	Folding, sorting and degradation; Nucleotide metabolism; Translation	[K].VKGISFDIIRDAIYQAK.[E]	Q3ZXV6 1xAcetyl [K510]	Q3ZXV6 [509-525]	n.d	n.d
Q3ZXV9	cbdbA928	ATP-dependent RNA helicase, DEAD OS=Dehalococcoides mccartyi (strain CBDB1) GN=cbdbA928 PE=4 SV=1	Poorly characterized	[K].ALAQDQLRSLK.[S]	Q3ZXV9 1xAcetyl [K121]	Q3ZXV9 [111-121]	id.	n.d
Q3ZXW3	cbdbA951	Acetyltransferase, GNAT family OS=Dehalococcoides mccartyi (strain CBDB1) GN=cbdbA951 PE=4 SV=1		[-].MKEPLILQTPR.[L]	Q3ZXW3 1xAcetyl [M/K or K2]	Q3ZXW3 [1-11]	id.	n.d
Q3ZXW3	cbdbA951	Acetyltransferase, GNAT family OS=Dehalococcoides mccartyi (strain CBDB1) GN=cbdbA951 PE=4 SV=1		[R].LLTKYEASR.[F]	Q3ZXW3 1xAcetyl [K60]	Q3ZXW3 [57-65]	n.d	id.
Q3ZXW3	cbdbA951	Acetyltransferase, GNAT family OS=Dehalococcoides mccartyi (strain CBDB1) GN=cbdbA951 PE=4 SV=1		[-].MKEPLILQTPR.[L]	Q3ZXW3 1xAcetyl [K2]	Q3ZXW3 [1-11]	-1.01697	n.d	0.25085
Q3ZXX3	cbdbA960	Elongation factor Tu OS=Dehalococcoides mccartyi (strain CBDB1) GN=tuf PE=3 SV=1	Translation; Transport and catabolism	[R].AYDQIDNAPEEKAR.[G]	Q3ZXX3 1xAcetyl [K57]	Q3ZXX3 [46-59]	-3.45862	-2.83986	0.142796	0.161631
Q3ZXX3	cbdbA960	Elongation factor Tu OS=Dehalococcoides mccartyi (strain CBDB1) GN=tuf PE=3 SV=1	Translation; Transport and catabolism	[R].GMVLAKPGSIKPHVNAEAEVYVLSKDEGGR.[H]	Q3ZXX3 2xAcetyl [K301; K306]	Q3ZXX3 [296-325]	n.d	id.
Q3ZXX3	cbdbA960	Elongation factor Tu OS=Dehalococcoides mccartyi (strain CBDB1) GN=tuf PE=3 SV=1	Translation; Transport and catabolism	[R].HYAHIDCPGHADYIKNMITGAAQMDGAILVVSAPDGPMPQTR.[E]	Q3ZXX3 1xAcetyl [K90]	Q3ZXX3 [76-117]	n.d	id.
Q3ZXX3	cbdbA960	Elongation factor Tu OS=Dehalococcoides mccartyi (strain CBDB1) GN=tuf PE=3 SV=1	Translation; Transport and catabolism	[K].ISTIYPVAMEKGMR.[F]	Q3ZXX3 1xAcetyl [K377]	Q3ZXX3 [367-380]	id.	-2.6684		0.186193
Q3ZXX3	cbdbA960	Elongation factor Tu OS=Dehalococcoides mccartyi (strain CBDB1) GN=tuf PE=3 SV=1	Translation; Transport and catabolism	[R].HTPFFNGYKPQFFFGTTDVTGEIHLPEGVEMVVPGDHVK.[M]	Q3ZXX3 1xAcetyl [K]	Q3ZXX3 [326-364]	n.d	id.
Q3ZXX3	cbdbA960	Elongation factor Tu OS=Dehalococcoides mccartyi (strain CBDB1) GN=tuf PE=3 SV=1	Translation; Transport and catabolism	[R].SKPHCNVGTIGHVDHGKTTLTAAITK.[T]	Q3ZXX3 1xAcetyl [K]	Q3ZXX3 [9-34]	id.	id.
Q3ZXX3	cbdbA960	Elongation factor Tu OS=Dehalococcoides mccartyi (strain CBDB1) GN=tuf PE=3 SV=1	Translation; Transport and catabolism	[K].LMDAVDTYIPIPPRPVDKPFLMKVEDVFSIKGR.[G]	Q3ZXX3 1xAcetyl [K227]	Q3ZXX3 [197-229]	id.	id.
Q3ZXX3	cbdbA960	Elongation factor Tu OS=Dehalococcoides mccartyi (strain CBDB1) GN=tuf PE=3 SV=1	Translation; Transport and catabolism	[K].ALECGCGKR.[E]	Q3ZXX3 1xAcetyl [K185]	Q3ZXX3 [178-186]	n.d	id.
Q3ZXX3	cbdbA960	Elongation factor Tu OS=Dehalococcoides mccartyi (strain CBDB1) GN=tuf PE=3 SV=1	Translation; Transport and catabolism	[R].SKPHCNVGTIGHVDHGK.[T]	Q3ZXX3 1xAcetyl [K10]	Q3ZXX3 [9-25]	n.d	id.
Q3ZXX3	cbdbA960	Elongation factor Tu OS=Dehalococcoides mccartyi (strain CBDB1) GN=tuf PE=3 SV=1	Translation; Transport and catabolism	[K].LMDAVDTYIPIPPRPVDKPFLMKVEDVFSIKGR.[G]	Q3ZXX3 1xAcetyl [K219]	Q3ZXX3 [197-229]	id.	-2.60902		0.110303
Q3ZXX7	cbdbA957	50S ribosomal protein L11 OS=Dehalococcoides mccartyi (strain CBDB1) GN=rplK PE=3 SV=1	Translation	[K].AAGVTSGSGTPSKSVVAVISK.[G]	Q3ZXX7 1xAcetyl [K94]	Q3ZXX7 [82-102]	n.d	n.d
Q3ZXX8	cbdbA956	50S ribosomal protein L1 OS=Dehalococcoides mccartyi (strain CBDB1) GN=rplA PE=3 SV=1	Translation	[K].KMSAAKFDETVEMHLK.[M]	Q3ZXX8 1xAcetyl [K37]	Q3ZXX8 [32-47]	n.d	n.d
Q3ZXY0	cbdbA954	50S ribosomal protein L7/L12 OS=Dehalococcoides mccartyi (strain CBDB1) GN=rplL PE=3 SV=1	Translation	[K].INVIKAVR.[E]	Q3ZXY0 1xAcetyl [K73]	Q3ZXY0 [69-76]	n.d	id.
Q3ZXY0	cbdbA954	50S ribosomal protein L7/L12 OS=Dehalococcoides mccartyi (strain CBDB1) GN=rplL PE=3 SV=1	Translation	[R].ELTSLGLKEAK.[D]	Q3ZXY0 1xAcetyl [K84]	Q3ZXY0 [77-87]	n.d	id.
Q3ZXZ7	cbdbA983	Uncharacterized protein OS=Dehalococcoides mccartyi (strain CBDB1) GN=cbdbA983 PE=4 SV=1		[R].RAGEEAAEAVMKK.[I]	Q3ZXZ7 2xAcetyl [K57; K58]	Q3ZXZ7 [46-58]	-1.474	n.d	0.103301
Q3ZXZ8	cbdbA982	Uncharacterized protein OS=Dehalococcoides mccartyi (strain CBDB1) GN=cbdbA982 PE=4 SV=1		[K].VFNETKSGLKR.[Y]	Q3ZXZ8 1xAcetyl [K]	Q3ZXZ8 [16-26]	-2.37591	-1.84078	0.497533	0.107722
Q3ZXZ8	cbdbA982	Uncharacterized protein OS=Dehalococcoides mccartyi (strain CBDB1) GN=cbdbA982 PE=4 SV=1		[K].DGFEAQVSRVEKNDTTKK.[S]	Q3ZXZ8 1xAcetyl [K46]	Q3ZXZ8 [35-52]	n.d	id.
Q3ZY09	cbdbA1024	Conserved domain protein OS=Dehalococcoides mccartyi (strain CBDB1) GN=cbdbA1024 PE=4 SV=1		[R].ASESALLKMQENGAR.[I]	Q3ZY09 1xAcetyl [K184]	Q3ZY09 [177-191]	-2.25839	-1.59368	0.144281	0.148123
Q3ZY09	cbdbA1024	Conserved domain protein OS=Dehalococcoides mccartyi (strain CBDB1) GN=cbdbA1024 PE=4 SV=1		[R].SAKQAAQDSIR.[T]	Q3ZY09 1xAcetyl [K132]	Q3ZY09 [130-140]	-2.50557	id.	0.148369
Q3ZY09	cbdbA1024	Conserved domain protein OS=Dehalococcoides mccartyi (strain CBDB1) GN=cbdbA1024 PE=4 SV=1		[K].ESAEEYLKVTR.[I]	Q3ZY09 1xAcetyl [K18]	Q3ZY09 [11-21]	n.d	-2.03893		0.0325805
Q3ZY09	cbdbA1024	Conserved domain protein OS=Dehalococcoides mccartyi (strain CBDB1) GN=cbdbA1024 PE=4 SV=1		[K].MYAANKAR.[R]	Q3ZY09 1xAcetyl [K425]	Q3ZY09 [420-427]	-2.7195	id.	0.120225
Q3ZY09	cbdbA1024	Conserved domain protein OS=Dehalococcoides mccartyi (strain CBDB1) GN=cbdbA1024 PE=4 SV=1		[K].QIQETSHKAADDAK.[A]	Q3ZY09 1xAcetyl [K280]	Q3ZY09 [273-286]	n.d	id.
Q3ZY12	cbdbA1020	30S ribosomal protein S6 OS=Dehalococcoides mccartyi (strain CBDB1) GN=rpsF PE=3 SV=1	Translation	[K].TIAEKEGSFTEVNHWGK.[R]	Q3ZY12 1xAcetyl [K46]	Q3ZY12 [42-58]	n.d	id.
Q3ZY14	cbdbA1018	30S ribosomal protein S18 OS=Dehalococcoides mccartyi (strain CBDB1) GN=rpsR PE=3 SV=1	Translation	[K].IAEAKIEPK.[V]	Q3ZY14 1xAcetyl [K114]	Q3ZY14 [110-118]	id.	-1.67198		0.187804
Q3ZY14	cbdbA1018	30S ribosomal protein S18 OS=Dehalococcoides mccartyi (strain CBDB1) GN=rpsR PE=3 SV=1	Translation	[K].AEVAVPEVKAEVKPAAEASKPAESA.[-]	Q3ZY14 1xAcetyl [K131 or K135]	Q3ZY14 [123-147]	n.d	-2.17209		0.103935
Q3ZY18	cbdbA1015	Putative inner membrane protein, 60 kDa OS=Dehalococcoides mccartyi (strain CBDB1) GN=cbdbA1015 PE=3 SV=1	Cellular community - prokaryotes; Folding, sorting and degradation; Membrane transport; Translation	[R].SGSIYKTEK.[K]	Q3ZY18 1xAcetyl [K260]	Q3ZY18 [255-263]	id.	-1.67225		0.0337275
Q3ZY23	cbdbA1008	Tryptophan synthase beta chain OS=Dehalococcoides mccartyi (strain CBDB1) GN=trpB PE=3 SV=1	Amino acid metabolism	[R].GKLSNYEYPAELVK.[E]	Q3ZY23 1xAcetyl [K431]	Q3ZY23 [430-443]	n.d	-2.06814		0.110292
Q3ZY28	cbdbA1058	Glutamine amidotransferase, class II OS=Dehalococcoides mccartyi (strain CBDB1) GN=cbdbA1058 PE=4 SV=1		[K].TETECFLEKFLNVK.[H]	Q3ZY28 1xAcetyl [K90]	Q3ZY28 [82-95]	n.d	-1.29574		0.512484
Q3ZY35	cbdbA1050	Glutamine synthetase, type I OS=Dehalococcoides mccartyi (strain CBDB1) GN=glnA PE=3 SV=1	Amino acid metabolism; Carbohydrate metabolism; Cell growth and death; Energy metabolism; Signal transduction; Transport and catabolism	[R].VPEYKPGHEK.[S]	Q3ZY35 1xAcetyl [K322]	Q3ZY35 [318-327]	n.d	-1.49338		0.12958
Q3ZY60	cbdbA1077	Acetyl-CoA synthetase OS=Dehalococcoides mccartyi (strain CBDB1) GN=cbdbA1077 PE=4 SV=1		[K].SVALVGATDKEGSTGK.[I]	Q3ZY60 1xAcetyl [K21]	Q3ZY60 [12-27]	-1.95902	-1.37296	0.0824457	0.108878
Q3ZY84	cbdbA1103	Riboflavin biosynthesis protein RibBA OS=Dehalococcoides mccartyi (strain CBDB1) GN=ribA PE=3 SV=1	Metabolism of cofactors and vitamins	[R].HYLETKQR.[K]	Q3ZY84 1xAcetyl [K389]	Q3ZY84 [384-391]	id.	n.d
Q3ZY84	cbdbA1103	Riboflavin biosynthesis protein RibBA OS=Dehalococcoides mccartyi (strain CBDB1) GN=ribA PE=3 SV=1	Metabolism of cofactors and vitamins	[K].KVTEAELPTSHGQFKAVAYK.[S]	Q3ZY84 1xAcetyl [K222]	Q3ZY84 [208-227]	id.	n.d
Q3ZY85	cbdbA1102	6,7-dimethyl-8-ribityllumazine synthase OS=Dehalococcoides mccartyi (strain CBDB1) GN=ribH PE=3 SV=1	Metabolism of cofactors and vitamins	[R].GSTPHFEYVSSEVSKGIAR.[V]	Q3ZY85 1xAcetyl [K99]	Q3ZY85 [85-103]	n.d	n.d
Q3ZY92	cbdbA1095	Uncharacterized protein OS=Dehalococcoides mccartyi (strain CBDB1) GN=cbdbA1095 PE=4 SV=1		[K].NQTSNLVKFKDSADEK.[M]	Q3ZY92 1xAcetyl [K54]	Q3ZY92 [47-62]	n.d	id.
Q3ZY99	cbdbA1138	Uncharacterized protein OS=Dehalococcoides mccartyi (strain CBDB1) GN=cbdbA1138 PE=4 SV=1		[K].YKDGILVVSYATKKDDYVEIVNR.[T]	Q3ZY99 1xAcetyl [K36]	Q3ZY99 [35-57]	id.	n.d
Q3ZYB0	cbdbA1126	Acetyl-CoA synthetase OS=Dehalococcoides mccartyi (strain CBDB1) GN=acs PE=4 SV=1	Carbohydrate metabolism; Energy metabolism; Lipid metabolism	[K].NVEASAEVKR.[E]	Q3ZYB0 1xAcetyl [K573]	Q3ZYB0 [565-574]	n.d	-1.95264		0.0897209
Q3ZYB0	cbdbA1126	Acetyl-CoA synthetase OS=Dehalococcoides mccartyi (strain CBDB1) GN=acs PE=4 SV=1	Carbohydrate metabolism; Energy metabolism; Lipid metabolism	[R].ADEVIKVAGHR.[I]	Q3ZYB0 1xAcetyl [K518]	Q3ZYB0 [513-523]	n.d	-2.45672		0.203347
Q3ZYB0	cbdbA1126	Acetyl-CoA synthetase OS=Dehalococcoides mccartyi (strain CBDB1) GN=acs PE=4 SV=1	Carbohydrate metabolism; Energy metabolism; Lipid metabolism	[K].KFDTQNLPTK.[T]	Q3ZYB0 1xAcetyl [K7]	Q3ZYB0 [7-16]	n.d	-1.76539		0.0576162
Q3ZYB5	cbdbA1120	GTP cyclohydrolase 1 OS=Dehalococcoides mccartyi (strain CBDB1) GN=folE PE=3 SV=1	Metabolism of cofactors and vitamins	[R].VVGISKLAR.[V]	Q3ZYB5 1xAcetyl [K104]	Q3ZYB5 [99-107]	id.	-0.264071		0.168094
Q3ZYC6	cbdbA1164	Putative iron-sulfur flavoprotein OS=Dehalococcoides mccartyi (strain CBDB1) GN=cbdbA1164 PE=4 SV=1		[R].VFGCLACGQCKINK.[N]	Q3ZYC6 1xAcetyl [K54]	Q3ZYC6 [44-57]	n.d	-1.62651		0.201605
Q3ZYF7	cbdbA1187	DAK2 domain protein OS=Dehalococcoides mccartyi (strain CBDB1) GN=cbdbA1187 PE=4 SV=1	Poorly characterized	[R].STKLNGLNIK.[K]	Q3ZYF7 1xAcetyl [K453]	Q3ZYF7 [451-460]	n.d	-1.6557		0.0467643
Q3ZYG1	cbdbA1182	Uncharacterized protein OS=Dehalococcoides mccartyi (strain CBDB1) GN=cbdbA1182 PE=4 SV=1		[R].TAHSLTGKFSEVLASSSHSVSK.[A]	Q3ZYG1 1xAcetyl [K146]	Q3ZYG1 [139-160]	n.d	n.d
Q3ZYG3	cbdbA1180	Acetylglutamate kinase OS=Dehalococcoides mccartyi (strain CBDB1) GN=argB PE=3 SV=1	Amino acid metabolism	[R].LVFLTDVPAVKGK.[N]	Q3ZYG3 1xAcetyl [K]	Q3ZYG3 [185-197]	n.d	id.
Q3ZYH0	cbdbB26	Uncharacterized protein OS=Dehalococcoides mccartyi (strain CBDB1) GN=cbdbA1236 PE=4 SV=1		[R].GYTNDPKR.[C]	Q3ZYH0 1xAcetyl [K37]	Q3ZYH0 [31-38]	id.	n.d
Q3ZYI8	cbdbA1208	Acyl carrier protein OS=Dehalococcoides mccartyi (strain CBDB1) GN=acpP PE=3 SV=1	Lipid metabolism	[K].FEIPDTDAEKLK.[T]	Q3ZYI8 1xAcetyl [K67]	Q3ZYI8 [58-69]	n.d	id.
Q3ZYJ9	cbdbA1256	UPF0234 protein cbdbA1256 OS=Dehalococcoides mccartyi (strain CBDB1) GN=cbdbA1256 PE=3 SV=1	Cellular processes and signaling	[K].NSKYELELNRK.[D]	Q3ZYJ9 1xAcetyl [K36]	Q3ZYJ9 [34-44]	n.d	id.
Q3ZYL0	cbdbA1245	Uncharacterized protein OS=Dehalococcoides mccartyi (strain CBDB1) GN=cbdbA1245 PE=4 SV=1		[K].NGEKFNPETAPDKSK.[W]	Q3ZYL0 1xAcetyl [K36]	Q3ZYL0 [33-47]	id.	-2.01654		0.0763498
Q3ZYL0	cbdbA1245	Uncharacterized protein OS=Dehalococcoides mccartyi (strain CBDB1) GN=cbdbA1245 PE=4 SV=1		[K].NKGFHLGLDFKDSVK.[-]	Q3ZYL0 1xAcetyl [K111]	Q3ZYL0 [101-115]	n.d	id.
Q3ZYL7	cbdbA1293	Tryptophan--tRNA ligase OS=Dehalococcoides mccartyi (strain CBDB1) GN=trpS PE=3 SV=1	Amino acid metabolism; Translation	[R].LTNFPTVVGLDGKDKMSK.[S]	Q3ZYL7 1xAcetyl [K191 or 189]	Q3ZYL7 [177-194]	n.d	n.d
Q3ZYL7	cbdbA1293	Tryptophan--tRNA ligase OS=Dehalococcoides mccartyi (strain CBDB1) GN=trpS PE=3 SV=1	Amino acid metabolism; Translation	[R].LTNFPTVVGLDGKDK.[M]	Q3ZYL7 1xAcetyl [K189]	Q3ZYL7 [177-191]	id.	n.d
Q3ZYL8	cbdbA1292	Aspartate aminotransferase OS=Dehalococcoides mccartyi (strain CBDB1) GN=aspC PE=3 SV=1	Amino acid metabolism	[R].KTGLSSNEFAEKLLMEEK.[V]	Q3ZYL8 1xAcetyl [K346]	Q3ZYL8 [335-352]	n.d	n.d
Q3ZYN1	cbdbA1276	Phosphoribosyl-AMP cyclohydrolase OS=Dehalococcoides mccartyi (strain CBDB1) GN=hisI PE=4 SV=1	Amino acid metabolism	[R].SRQELWNKGATSGNK.[L]	Q3ZYN1 1xAcetyl [K56]	Q3ZYN1 [49-63]	n.d	-1.48458		0.0977685
Q3ZYN3	cbdbA1272	50S ribosomal protein L31 OS=Dehalococcoides mccartyi (strain CBDB1) GN=rpmE PE=3 SV=1	Translation	[K].IHPKYNTATNVICACGNTFTVGSTKDNIK.[V]	Q3ZYN3 1xAcetyl [K8]	Q3ZYN3 [5-33]	n.d	id.
Q3ZYP9	cbdbA1310	Twitching mobility protein OS=Dehalococcoides mccartyi (strain CBDB1) GN=pilT PE=4 SV=1	Cell motility; Membrane transport	[K].LIYEAEEKKGSDLHLVAQSPPLVR.[V]	Q3ZYP9 1xAcetyl [K]	Q3ZYP9 [6-29]	n.d	n.d
Q3ZYS3	cbdbA1336	Nicotinate-nucleotide pyrophosphorylase OS=Dehalococcoides mccartyi (strain CBDB1) GN=nadC PE=3 SV=1	Metabolism of cofactors and vitamins	[K].SKLPVTIEVNTLEQVAQAIEAAPNSILLDNMSIADMKK.[A]	Q3ZYS3 1xAcetyl [K]	Q3ZYS3 [190-227]	n.d	n.d
Q3ZYS8	cbdbA1331	Uncharacterized protein OS=Dehalococcoides mccartyi (strain CBDB1) GN=cbdbA1331 PE=4 SV=1		[K].LGSTGSKDETPGGEVKLK.[W]	Q3ZYS8 1xAcetyl [K]	Q3ZYS8 [117-134]	id.	-1.7423		0.118555
Q3ZYV0	cbdbA1359	Protein GrpE OS=Dehalococcoides mccartyi (strain CBDB1) GN=grpE PE=3 SV=1	Folding, sorting and degradation; Translation	[K].TDGQLENLNAQLAEEKK.[R]	Q3ZYV0 1xAcetyl [K]	Q3ZYV0 [22-38]	n.d	n.d
Q3ZYV1	cbdbA1358	Chaperone protein DnaK OS=Dehalococcoides mccartyi (strain CBDB1) GN=dnaK PE=3 SV=1	Folding, sorting and degradation; Membrane transport; Translation; Transport and catabolism	[K].DAGAIAGLKVLR.[I]	Q3ZYV1 1xAcetyl [K169]	Q3ZYV1 [161-172]	n.d	-2.65625		0.0923746
Q3ZYW8	cbdbA1393	60 kDa chaperonin OS=Dehalococcoides mccartyi (strain CBDB1) GN=groL PE=3 SV=1	Folding, sorting and degradation; Translation; Transport and catabolism	[K].DKTTIIDGEGSAEAIKDR.[I]	Q3ZYW8 1xAcetyl [K326 or K327]	Q3ZYW8 [326-343]	n.d	-2.90789		0.0228334
Q3ZYW8	cbdbA1393	60 kDa chaperonin OS=Dehalococcoides mccartyi (strain CBDB1) GN=groL PE=3 SV=1	Folding, sorting and degradation; Translation; Transport and catabolism	[R].IVSNKDKTTIIDGEGSAEAIKDR.[I]	Q3ZYW8 1xAcetyl [K325]	Q3ZYW8 [321-343]	n.d	id.
Q3ZYW8	cbdbA1393	60 kDa chaperonin OS=Dehalococcoides mccartyi (strain CBDB1) GN=groL PE=3 SV=1	Folding, sorting and degradation; Translation; Transport and catabolism	[R].QKAMLEDMAILTGGHVISK.[E]	Q3ZYW8 1xAcetyl [K284]	Q3ZYW8 [283-301]	id.	id.
Q3ZYW8	cbdbA1393	60 kDa chaperonin OS=Dehalococcoides mccartyi (strain CBDB1) GN=groL PE=3 SV=1	Folding, sorting and degradation; Translation; Transport and catabolism	[K].AVAALKAQLR.[K]	Q3ZYW8 1xAcetyl [K127]	Q3ZYW8 [122-131]	n.d	id.
Q3ZYW8	cbdbA1393	60 kDa chaperonin OS=Dehalococcoides mccartyi (strain CBDB1) GN=groL PE=3 SV=1	Folding, sorting and degradation; Translation; Transport and catabolism	[R].GIEKAVAALK.[A]	Q3ZYW8 1xAcetyl [K121]	Q3ZYW8 [118-127]	n.d	-2.44882		0.0971064
Q3ZYW8	cbdbA1393	60 kDa chaperonin OS=Dehalococcoides mccartyi (strain CBDB1) GN=groL PE=3 SV=1	Folding, sorting and degradation; Translation; Transport and catabolism	[K].QIIFGEKVR.[V]	Q3ZYW8 1xAcetyl [K10]	Q3ZYW8 [4-12]	id.	-2.34947		0.0431582
Q3ZYW8	cbdbA1393	60 kDa chaperonin OS=Dehalococcoides mccartyi (strain CBDB1) GN=groL PE=3 SV=1	Folding, sorting and degradation; Translation; Transport and catabolism	[K].NIAAGAEPINLKR.[G]	Q3ZYW8 1xAcetyl [K116]	Q3ZYW8 [105-117]	-3.12962	-2.4861	0.461354	0.11438
Q3ZYW8	cbdbA1393	60 kDa chaperonin OS=Dehalococcoides mccartyi (strain CBDB1) GN=groL PE=3 SV=1	Folding, sorting and degradation; Translation; Transport and catabolism	[R].WIATNAGKDGNVIVDKVK.[N]	Q3ZYW8 1xAcetyl [K465]	Q3ZYW8 [450-467]	n.d	-2.88706		0.201733
Q3ZYW8	cbdbA1393	60 kDa chaperonin OS=Dehalococcoides mccartyi (strain CBDB1) GN=groL PE=3 SV=1	Folding, sorting and degradation; Translation; Transport and catabolism	[K].AQIEETESAFDREKLQER.[Q]	Q3ZYW8 1xAcetyl [K362]	Q3ZYW8 [349-366]	-2.63084	id.	0.224397
Q3ZYW8	cbdbA1393	60 kDa chaperonin OS=Dehalococcoides mccartyi (strain CBDB1) GN=groL PE=3 SV=1	Folding, sorting and degradation; Translation; Transport and catabolism	[K].QQIVQVATITGKDPEIGNLIADVMDKVGK.[D]	Q3ZYW8 1xAcetyl [K152]	Q3ZYW8 [141-169]	id.	id.
Q3ZYW8	cbdbA1393	60 kDa chaperonin OS=Dehalococcoides mccartyi (strain CBDB1) GN=groL PE=3 SV=1	Folding, sorting and degradation; Translation; Transport and catabolism	[R].SALENAASIANMVLITDSLVADIQEKAPAAPGPEAAGMY.[-]	Q3ZYW8 1xAcetyl [K524]	Q3ZYW8 [499-537]	n.d	id.
Q3ZYW9	cbdbA1392	10 kDa chaperonin OS=Dehalococcoides mccartyi (strain CBDB1) GN=groS PE=3 SV=1	Folding, sorting and degradation; Translation	[K].VGEKVLFPK.[F]	Q3ZYW9 1xAcetyl [K66]	Q3ZYW9 [63-71]	n.d	-2.28569		0.117933
Q3ZYW9	cbdbA1392	10 kDa chaperonin OS=Dehalococcoides mccartyi (strain CBDB1) GN=groS PE=3 SV=1	Folding, sorting and degradation; Translation	[K].SQEGLIVAVGPGRLDKDGKR.[E]	Q3ZYW9 1xAcetyl [K]	Q3ZYW9 [37-56]	n.d	-2.53373		0.487116
Q3ZYW9	cbdbA1392	10 kDa chaperonin OS=Dehalococcoides mccartyi (strain CBDB1) GN=groS PE=3 SV=1	Folding, sorting and degradation; Translation	[R].FEPLHNMVLIQPQEKQDMSK.[G]	Q3ZYW9 1xAcetyl [K19]	Q3ZYW9 [5-24]	n.d	-2.78356		0.1396
Q3ZZB5	cbdbA329	IMP dehydrogenase family protein OS=Dehalococcoides mccartyi (strain CBDB1) GN=cbdbA329 PE=3 SV=1	Nucleotide metabolism; Transport and catabolism; Xenobiotics biodegradation and metabolism	[R].YVPIITDGGFKK.[G]	Q3ZZB5 1xAcetyl [K263]	Q3ZZB5 [253-264]	n.d	n.d
Q3ZZB5	cbdbA329	IMP dehydrogenase family protein OS=Dehalococcoides mccartyi (strain CBDB1) GN=cbdbA329 PE=3 SV=1	Nucleotide metabolism; Transport and catabolism; Xenobiotics biodegradation and metabolism	[K].GGICAVSLMPANAKK.[L]	Q3ZZB5 1xAcetyl [K]	Q3ZZB5 [129-143]	n.d	-2.16876		0.138732
Q3ZZB5	cbdbA329	IMP dehydrogenase family protein OS=Dehalococcoides mccartyi (strain CBDB1) GN=cbdbA329 PE=3 SV=1	Nucleotide metabolism; Transport and catabolism; Xenobiotics biodegradation and metabolism	[K].SYQLSKCQ.[-]	Q3ZZB5 1xAcetyl [K379]	Q3ZZB5 [374-381]	n.d	id.
Q3ZZB8	cbdbA327	Pyridoxal biosynthesis lyase PdxS OS=Dehalococcoides mccartyi (strain CBDB1) GN=pdxS PE=3 SV=1	Metabolism of cofactors and vitamins	[-].METGTFKVK.[S]	Q3ZZB8 1xAcetyl [K7]	Q3ZZB8 [1-9]	n.d	-1.60603		0.066659
Q3ZZD1	cbdbA309	Inorganic pyrophosphatase OS=Dehalococcoides mccartyi (strain CBDB1) GN=ppa PE=3 SV=1	Energy metabolism	[K].TIVGCGEAKCPK.[L]	Q3ZZD1 1xAcetyl [K30]	Q3ZZD1 [22-33]	n.d	-1.52701		0.0170259
Q3ZZD1	cbdbA309	Inorganic pyrophosphatase OS=Dehalococcoides mccartyi (strain CBDB1) GN=ppa PE=3 SV=1	Energy metabolism	[R].YLDTLKDTKK.[V]	Q3ZZD1 1xAcetyl [K]	Q3ZZD1 [200-209]	n.d	-1.80814		0.154166
Q3ZZF6	cbdbA343	Nucleoside diphosphate kinase OS=Dehalococcoides mccartyi (strain CBDB1) GN=ndk PE=3 SV=1	Folding, sorting and degradation; Nucleotide metabolism; Signal transduction	[K].AMGATDPAKSEK.[G]	Q3ZZF6 1xAcetyl [K95]	Q3ZZF6 [87-98]	-2.49191	-2.19249	0.0750671	0.0734373
Q3ZZG3	cbdbA390	Serine hydroxymethyltransferase OS=Dehalococcoides mccartyi (strain CBDB1) GN=glyA PE=3 SV=1	Amino acid metabolism; Carbohydrate metabolism; Drug resistance; Energy metabolism; Metabolism of cofactors and vitamins; Metabolism of other amino acids	[K].YAEGYPGKR.[Y]	Q3ZZG3 1xAcetyl [K58]	Q3ZZG3 [51-59]	n.d	id.
Q3ZZH8	cbdbA372	DegV family protein OS=Dehalococcoides mccartyi (strain CBDB1) GN=degV PE=4 SV=1		[K].LSGTYDSAIQAKK.[L]	Q3ZZH8 1xAcetyl [K]	Q3ZZH8 [92-104]	n.d	id.
Q3ZZI3	cbdbA368.1	Uncharacterized protein OS=Dehalococcoides mccartyi (strain CBDB1) GN=cbdbA368.1 PE=4 SV=1		[K].DCYAKTKESE.[-]	Q3ZZI3 1xAcetyl [K90]	Q3ZZI3 [86-95]	n.d	n.d
Q3ZZI5	cbdbA427	3-phosphoshikimate 1-carboxyvinyltransferase OS=Dehalococcoides mccartyi (strain CBDB1) GN=aroA PE=3 SV=1	Amino acid metabolism	[K].IHLDKSLPGGNIAVPSSK.[S]	Q3ZZI5 1xAcetyl [K7]	Q3ZZI5 [3-20]	id.	n.d
Q3ZZI5	cbdbA427	3-phosphoshikimate 1-carboxyvinyltransferase OS=Dehalococcoides mccartyi (strain CBDB1) GN=aroA PE=3 SV=1	Amino acid metabolism	[K].SLPGGNIAVPSSKSYTIR.[G]	Q3ZZI5 1xAcetyl [K20]	Q3ZZI5 [8-25]	n.d	id.
Q3ZZJ8	cbdbA408	Putative isocitrate dehydrogenase OS=Dehalococcoides mccartyi (strain CBDB1) GN=cbdbA408 PE=3 SV=1	Carbohydrate metabolism	[K].SVTYDMLSPDKQAVAVGTSQVADAIIAK.[M]	Q3ZZJ8 1xAcetyl [K340]	Q3ZZJ8 [330-357]	id.	n.d
Q3ZZL8	cbdbA445	30S ribosomal protein S3 OS=Dehalococcoides mccartyi (strain CBDB1) GN=rpsC PE=3 SV=1	Translation	[K].VADIAAKPK.[R]	Q3ZZL8 1xAcetyl [K245]	Q3ZZL8 [239-247]	n.d	-2.03689		0.0722937
Q3ZZL8	cbdbA445	30S ribosomal protein S3 OS=Dehalococcoides mccartyi (strain CBDB1) GN=rpsC PE=3 SV=1	Translation	[R].AMKQAIFR.[S]	Q3ZZL8 1xAcetyl [K135]	Q3ZZL8 [133-140]	n.d	id.
Q3ZZM4	cbdbA439	50S ribosomal protein L3 OS=Dehalococcoides mccartyi (strain CBDB1) GN=rplC PE=3 SV=1	Translation	[K].TEKQDGYEAVQLGYGKAK.[H]	Q3ZZM4 1xAcetyl [K55 or K57]	Q3ZZM4 [40-57]	n.d	-2.27382		0.0191645
Q3ZZM5	cbdbA438	30S ribosomal protein S10 OS=Dehalococcoides mccartyi (strain CBDB1) GN=rpsJ PE=3 SV=1	Translation	[R].ASFIDKDSQEQFEIR.[T]	Q3ZZM5 1xAcetyl [K59]	Q3ZZM5 [54-68]	n.d	-2.89136		0.447001
Q3ZZN0	cbdbA432	Phospho-2-dehydro-3-deoxyheptonate aldolase OS=Dehalococcoides mccartyi (strain CBDB1) GN=aroF PE=4 SV=1	Amino acid metabolism	[K].SIPFAYFSSLPGVKEAR.[M]	Q3ZZN0 1xAcetyl [K59]	Q3ZZN0 [46-62]	n.d	-2.17357		0.102775
Q3ZZN0	cbdbA432	Phospho-2-dehydro-3-deoxyheptonate aldolase OS=Dehalococcoides mccartyi (strain CBDB1) GN=aroF PE=4 SV=1	Amino acid metabolism	[R].CGLKTDVSK.[G]	Q3ZZN0 1xAcetyl [K26]	Q3ZZN0 [23-31]	n.d	-2.66992		0.129101
Q3ZZN0	cbdbA432	Phospho-2-dehydro-3-deoxyheptonate aldolase OS=Dehalococcoides mccartyi (strain CBDB1) GN=aroF PE=4 SV=1	Amino acid metabolism	[R].QINKLVK.[K]	Q3ZZN0 1xAcetyl [K346]	Q3ZZN0 [343-349]	n.d	id.
Q3ZZN0	cbdbA432	Phospho-2-dehydro-3-deoxyheptonate aldolase OS=Dehalococcoides mccartyi (strain CBDB1) GN=aroF PE=4 SV=1	Amino acid metabolism	[R].GGVYKPR.[S]	Q3ZZN0 1xAcetyl [K136]	Q3ZZN0 [132-138]	n.d	id.
Q3ZZN1	cbdbA431	3-dehydroquinate synthase OS=Dehalococcoides mccartyi (strain CBDB1) GN=aroB PE=3 SV=1	Amino acid metabolism	[K].VAVNHGGVKNIVGSFYQPR.[L]	Q3ZZN1 1xAcetyl [K152]	Q3ZZN1 [144-162]	n.d	id.
Q3ZZN1	cbdbA431	3-dehydroquinate synthase OS=Dehalococcoides mccartyi (strain CBDB1) GN=aroB PE=3 SV=1	Amino acid metabolism	[K].LIADFGLPTNPKDIDPDKIIEAMHHDKK.[V]	Q3ZZN1 1xAcetyl [K322]	Q3ZZN1 [296-323]	n.d	-1.72517		0.0955467
Q3ZZN4	cbdbA453	50S ribosomal protein L6 OS=Dehalococcoides mccartyi (strain CBDB1) GN=rplF PE=3 SV=1	Translation	[K].VDINGNDVTVKGPK.[G]	Q3ZZN4 1xAcetyl [K27]	Q3ZZN4 [17-30]	n.d	-2.14119		0.296031
Q3ZZN6	cbdbA477	Adenosylhomocysteinase OS=Dehalococcoides mccartyi (strain CBDB1) GN=ahcY PE=3 SV=1	Amino acid metabolism; Enzyme families; Transport and catabolism	[K].DTIRPSVEEYKMK.[D]	Q3ZZN6 1xAcetyl [K323]	Q3ZZN6 [313-325]	n.d	-2.10264		0.0300014
Q3ZZP9	cbdbA463	30S ribosomal protein S13 OS=Dehalococcoides mccartyi (strain CBDB1) GN=rpsM PE=3 SV=1	Translation	[R].LREIIDKEYRVEGDLRK.[E]	Q3ZZP9 1xAcetyl [K62]	Q3ZZP9 [56-72]	id.	n.d
Q3ZZR3	cbdbA510	Uncharacterized protein OS=Dehalococcoides mccartyi (strain CBDB1) GN=cbdbA510 PE=4 SV=1		[K].NQSAVAECIELVNKLNLPMK.[L]	Q3ZZR3 1xAcetyl [K95]	Q3ZZR3 [82-101]	n.d	id.
Q3ZZT7	cbdbA538	ATP synthase subunit beta OS=Dehalococcoides mccartyi (strain CBDB1) GN=atpD PE=3 SV=1	Energy metabolism	[K].IGALGGAGVGKTVLIQELIR.[N]	Q3ZZT7 1xAcetyl [K156]	Q3ZZT7 [146-165]	id.	-2.00949		0.341087
Q3ZZT7	cbdbA538	ATP synthase subunit beta OS=Dehalococcoides mccartyi (strain CBDB1) GN=atpD PE=3 SV=1	Energy metabolism	[R].DVQKVLQR.[Y]	Q3ZZT7 1xAcetyl [K364]	Q3ZZT7 [361-368]	n.d	id.
Q3ZZT9	cbdbA536	ATP synthase subunit alpha OS=Dehalococcoides mccartyi (strain CBDB1) GN=atpA PE=3 SV=1	Energy metabolism	[R].VGSSAQTKAMK.[K]	Q3ZZT9 1xAcetyl [K373]	Q3ZZT9 [366-376]	n.d	n.d
Q3ZZU1	cbdbA534	ATP synthase subunit b OS=Dehalococcoides mccartyi (strain CBDB1) GN=atpF PE=3 SV=1	Energy metabolism	[K].VIDQSLDKK.[A]	Q3ZZU1 1xAcetyl [K]	Q3ZZU1 [142-150]	n.d	-2.12331		0.222625
Q3ZZU6	cbdbA529	Phosphoenolpyruvate synthase OS=Dehalococcoides mccartyi (strain CBDB1) GN=ppsA PE=3 SV=1	Carbohydrate metabolism; Energy metabolism	[R].NVKTSNIASIVR.[E]	Q3ZZU6 1xAcetyl [K453]	Q3ZZU6 [451-462]	id.	-1.22835		0.0655493
Q3ZZV8	cbdbA515	50S ribosomal protein L9 OS=Dehalococcoides mccartyi (strain CBDB1) GN=rplI PE=3 SV=1	Translation	[K].SEIAAKQAAEER.[R]	Q3ZZV8 1xAcetyl [K50]	Q3ZZV8 [45-56]	n.d	-1.84433		0.139924
Q3ZZW3	cbdbA1738	30S ribosomal protein S20 OS=Dehalococcoides mccartyi (strain CBDB1) GN=rpsT PE=3 SV=1	Translation	[K].KLVDAGSINEAETAAVSAQSNLDKAAEK.[G]	Q3ZZW3 1xAcetyl [K60]	Q3ZZW3 [37-64]	n.d	n.d
Q3ZZW8	cbdbA1731	Aspartokinase OS=Dehalococcoides mccartyi (strain CBDB1) GN=metL PE=3 SV=1	Amino acid metabolism; Biosynthesis of other secondary metabolites	[R].ITCIIEEDKVKDAVR.[A]	Q3ZZW8 1xAcetyl [K]	Q3ZZW8 [380-394]	n.d	n.d
Q3ZZW9	cbdbA1730	NifU protein, homolog OS=Dehalococcoides mccartyi (strain CBDB1) GN=cbdbA1730 PE=4 SV=1		[-].MLEKVEAVLDKIRPALEADGGNVELVDVVDGVVK.[V]	Q3ZZW9 1xAcetyl [K1 or K4]	Q3ZZW9 [1-34]	-2.5833	n.d	1.32666
Q3ZZW9	cbdbA1730	NifU protein, homolog OS=Dehalococcoides mccartyi (strain CBDB1) GN=cbdbA1730 PE=4 SV=1		[-].MLEKVEAVLDK.[I]	Q3ZZW9 1xAcetyl [N-Term]	Q3ZZW9 [1-11]	-1.46149	-1.66412	0.133453	0.407758
Q3ZZW9	cbdbA1730	NifU protein, homolog OS=Dehalococcoides mccartyi (strain CBDB1) GN=cbdbA1730 PE=4 SV=1		[-].MLEKVEAVLDK.[I]	Q3ZZW9 1xAcetyl [K4]	Q3ZZW9 [1-11]	id.	n.d
Q3ZZX7	cbdbA1720	Putative desulforedoxin OS=Dehalococcoides mccartyi (strain CBDB1) GN=cbdbA1720 PE=4 SV=1		[K].RIEDSYKAPINLPDSSGE.[-]	Q3ZZX7 1xAcetyl [K44]	Q3ZZX7 [38-55]	n.d	id.
>1 acetylated peptide				Amino acids in brackets give information about adjacent protein area
						number of proteins:	19	79

## Sheet: C
																Identifications (High = identified)						MS1 areas
																Proteome						Proteome
locus tag	Protein FDR Confidence	Master	Accession	Description	Contaminant	Exp. q-value	Sum PEP Score	Coverage	# Peptides	# PSMs	# Unique Peptides	# Protein Groups	# AAs	MW [kDa]	calc. pI	exp_1	exp_2	exp_3	stat_1	stat_2	stat_3	exp_1	exp_2	exp_3	stat_1	stat_2	stat_3
cbdbA1393	High	Master Protein	Q3ZYW8	60 kDa chaperonin OS=Dehalococcoides mccartyi (strain CBDB1) GN=groL PE=3 SV=1	FALSE	0	1633.38	97	102	8144	102	1	537	57.1	5.27	High	High	High	High	High	High	2.42789e+09	2.8887e+09	2.25254e+09	1.23867e+10	1.45315e+10	9.91557e+09
cbdbA587	High	Master Protein	Q3ZX00	DNA-directed RNA polymerase subunit beta' OS=Dehalococcoides mccartyi (strain CBDB1) GN=rpoC PE=3 SV=1	FALSE	0	1129.99	82	111	2406	111	1	1295	144.2	7.36	High	High	High	High	High	High	2.28685e+08	2.20152e+08	2.62064e+08	9.01459e+08	8.08961e+08	7.2955e+08
cbdbA727	High	Master Protein	Q3ZXB4	Uncharacterized protein OS=Dehalococcoides mccartyi (strain CBDB1) GN=cbdbA727 PE=4 SV=1	FALSE	0	1102.21	78	95	2565	95	1	843	84.9	5.62	High	High	High	High	High	High	4.61828e+08	5.39513e+08	4.94177e+08	2.30357e+09	2.08976e+09	2.13778e+09
cbdbA1077	High	Master Protein	Q3ZY60	Acetyl-CoA synthetase OS=Dehalococcoides mccartyi (strain CBDB1) GN=cbdbA1077 PE=4 SV=1	FALSE	0	1004.09	77	83	2184	83	1	891	97.6	6.32	High	High	High	High	High	High	3.63926e+08	4.46616e+08	3.69165e+08	1.69587e+09	1.70998e+09	1.59603e+09
cbdbA195	High	Master Protein	Q3ZWQ7	Formate dehydrogenase, major subunit OS=Dehalococcoides mccartyi (strain CBDB1) GN=fdnG PE=4 SV=1	FALSE	0	997.334	82	69	2716	69	1	993	105.7	6.51	High	High	High	High	High	High	7.81294e+08	1.01169e+09	1.11671e+09	3.56279e+09	3.55383e+09	3.12071e+09
cbdbA586	High	Master Protein	Q3ZX01	DNA-directed RNA polymerase subunit beta OS=Dehalococcoides mccartyi (strain CBDB1) GN=rpoB PE=3 SV=1	FALSE	0	986.903	71	107	2418	107	1	1273	141.4	5.31	High	High	High	High	High	High	1.95939e+08	2.44528e+08	2.07409e+08	1.11647e+09	1.07139e+09	9.59312e+08
cbdbA388	High	Master Protein	Q3ZZG5	Protein translocase subunit SecA OS=Dehalococcoides mccartyi (strain CBDB1) GN=secA PE=3 SV=1	FALSE	0	974.832	76	85	1422	85	1	952	107	6.47	High	High	High	High	High	High	5.95749e+07	8.60253e+07	7.03983e+07	8.36622e+08	7.29672e+08	6.18857e+08
cbdbA80	High	Master Protein	Q3ZWG0	Putative reductive dehalogenase OS=Dehalococcoides mccartyi (strain CBDB1) GN=rdhA PE=4 SV=1	FALSE	0	971.532	95	65	5757	65	1	496	56.4	6.13	High	High	High	High	High	High	3.36244e+09	2.73951e+09	2.24746e+09	2.21767e+10	1.6147e+10	1.1064e+10
cbdbA1358	High	Master Protein	Q3ZYV1	Chaperone protein DnaK OS=Dehalococcoides mccartyi (strain CBDB1) GN=dnaK PE=3 SV=1	FALSE	0	868.109	80	78	3167	78	1	636	68.5	5.17	High	High	High	High	High	High	7.71559e+08	1.09039e+09	8.5689e+08	5.69132e+09	5.64225e+09	4.91735e+09
cbdbA960	High	Master Protein	Q3ZXX3	Elongation factor Tu OS=Dehalococcoides mccartyi (strain CBDB1) GN=tuf PE=3 SV=1	FALSE	0	821.593	95	47	3834	47	1	400	43.9	6.25	High	High	High	High	High	High	2.30322e+09	2.49683e+09	2248023249	1.15103e+10	1.15174e+10	9.34437e+09
cbdbA529	High	Master Protein	Q3ZZU6	Phosphoenolpyruvate synthase OS=Dehalococcoides mccartyi (strain CBDB1) GN=ppsA PE=3 SV=1	FALSE	0	780.634	73	61	1476	61	1	758	83.2	5.47	High	High	High	High	High	High	1.77829e+08	2.28397e+08	2.08971e+08	1.09949e+09	9.82693e+08	9.27082e+08
cbdbA129	High	Master Protein	Q3ZWL5	Ni/Fe hydrogenase large subunit OS=Dehalococcoides mccartyi (strain CBDB1) GN=hupL PE=3 SV=1	FALSE	0	724.897	77	53	2380	53	1	526	58	6.1	High	High	High	High	High	High	8.24284e+08	1.02384e+09	1.01726e+09	5.1119e+09	5.01912e+09	4.74218e+09
cbdbA437	High	Master Protein	Q3ZZM6	Elongation factor G OS=Dehalococcoides mccartyi (strain CBDB1) GN=fusA PE=3 SV=1	FALSE	0	702.02	82	60	1508	60	1	693	76.5	5.44	High	High	High	High	High	High	1.42121e+08	2.06874e+08	2.13951e+08	1.36356e+09	1.27371e+09	1.09346e+09
cbdbA1187	High	Master Protein	Q3ZYF7	DAK2 domain protein OS=Dehalococcoides mccartyi (strain CBDB1) GN=cbdbA1187 PE=4 SV=1	FALSE	0	661.23	88	50	1347	50	1	544	58.8	5.06	High	High	High	High	High	High	7.23606e+07	1.00997e+08	1.01441e+08	1.09064e+09	8.70233e+08	6.91706e+08
cbdbA1008	High	Master Protein	Q3ZY23	Tryptophan synthase beta chain OS=Dehalococcoides mccartyi (strain CBDB1) GN=trpB PE=3 SV=1	FALSE	0	647.028	82	35	1839	35	1	454	50.2	6.73	High	High	High	High	High	High	8.82746e+08	1.12852e+09	1.00764e+09	3.55042e+09	3.88554e+09	3.37942e+09
cbdbA684	High	Master Protein	Q3ZX66	Putative [Fe] hydrogenase, HymB subunit OS=Dehalococcoides mccartyi (strain CBDB1) GN=hymB PE=4 SV=1	FALSE	0	626.374	82	55	1643	55	1	623	67.8	7.02	High	High	High	High	High	High	2.49713e+08	3.00044e+08	3.06475e+08	1.41946e+09	1.2585e+09	1.14485e+09
cbdbA1142	High	Master Protein	Q3ZYE3	Uncharacterized protein OS=Dehalococcoides mccartyi (strain CBDB1) GN=cbdbA1142 PE=4 SV=1	FALSE	0	620.009	84	33	1963	33	1	365	40.3	6.47	High	High	High	High	High	High	4.62391e+08	6.56601e+08	4.0432e+08	3.63449e+09	3.71065e+09	2.95802e+09
cbdbA1130	High	Master Protein	Q3ZYA7	Translation elongation factor G OS=Dehalococcoides mccartyi (strain CBDB1) GN=fusA PE=4 SV=1	FALSE	0	617.719	74	50	1055	50	1	686	73.9	5.4	High	High	High	High	High	High	9.3819e+07	1.19099e+08	1.12532e+08	4.57045e+08	4.64898e+08	3.90575e+08
cbdbA1374	High	Master Protein	Q3ZYT8	ATP-dependent Clp protease, ATP-binding subunit ClpC OS=Dehalococcoides mccartyi (strain CBDB1) GN=clpA PE=3 SV=1	FALSE	0	613.722	75	73	1080	73	1	812	91.6	5.76	High	High	High	High	High	High	1.16461e+08	1.4432e+08	1.57544e+08	630269233	6.59897e+08	5.46237e+08
cbdbA580	High	Master Protein	Q3ZX05	D-3-phosphoglycerate dehydrogenase OS=Dehalococcoides mccartyi (strain CBDB1) GN=serA PE=3 SV=1	FALSE	0	612.927	93	50	1654	50	1	526	56.5	6.64	High	High	High	High	High	High	2.87689e+08	4.06761e+08	3.36752e+08	2.20056e+09	1.98637e+09	1.73495e+09
cbdbA70	High	Master Protein	Q3ZWB9	ATP-dependent Clp protease, ATP-binding subunit OS=Dehalococcoides mccartyi (strain CBDB1) GN=clpC PE=3 SV=1	FALSE	0	605.41	80	72	1085	72	1	824	91.6	6.02	High	High	High	High	High	High	1.07945e+08	1.30661e+08	1.20068e+08	6.80752e+08	5.46381e+08	4.77983e+08
cbdbA1568	High	Master Protein	Q3ZVV7	Glutamine synthetase OS=Dehalococcoides mccartyi (strain CBDB1) GN=glnA PE=3 SV=1	FALSE	0	595.524	88	49	2005	49	1	501	55.6	6.54	High	High	High	High	High	High	4.07345e+08	4.99276e+08	5.18973e+08	3.01357e+09	2.26799e+09	2.2193e+09
cbdbA932	High	Master Protein	Q3ZXV6	Polyribonucleotide nucleotidyltransferase OS=Dehalococcoides mccartyi (strain CBDB1) GN=pnp PE=3 SV=1	FALSE	0	594.122	78	64	1439	64	1	720	78.3	5.49	High	High	High	High	High	High	3.66285e+08	4.54631e+08	5.10644e+08	2.0113e+09	1.90005e+09	1.718e+09
cbdbA84	High	Master Protein	Q3ZWF5	Putative reductive dehalogenase OS=Dehalococcoides mccartyi (strain CBDB1) GN=rdhA PE=4 SV=1	FALSE	0	589.659	82	42	1850	42	1	488	54.1	6.47	High	High	High	High	High	High	6.19097e+08	7.38155e+08	7.59219e+08	4.14132e+09	4.81642e+09	3.1032e+09
cbdbA1024	High	Master Protein	Q3ZY09	Conserved domain protein OS=Dehalococcoides mccartyi (strain CBDB1) GN=cbdbA1024 PE=4 SV=1	FALSE	0	584.817	76	53	1388	53	1	441	48.5	5.14	High	High	High	High	High	High	2.37229e+08	2.36544e+08	2.97333e+08	1.0244e+09	9.45749e+08	8.87691e+08
cbdbA538	High	Master Protein	Q3ZZT7	ATP synthase subunit beta OS=Dehalococcoides mccartyi (strain CBDB1) GN=atpD PE=3 SV=1	FALSE	0	581.641	79	40	2413	40	1	464	50.7	5.08	High	High	High	High	High	High	1.00046e+09	1.37033e+09	8.6805e+08	4709411724	5.00899e+09	4.06061e+09
cbdbA664	High	Master Protein	Q3ZX83	Trigger factor OS=Dehalococcoides mccartyi (strain CBDB1) GN=tig PE=3 SV=1	FALSE	0	575.446	90	48	1367	48	1	447	51	4.69	High	High	High	High	High	High	3.70048e+08	4.23197e+08	3.18037e+08	1.49997e+09	1.31117e+09	1.38713e+09
cbdbA308	High	Master Protein	Q3ZZD2	Phenylalanine--tRNA ligase beta subunit OS=Dehalococcoides mccartyi (strain CBDB1) GN=pheT PE=3 SV=1	FALSE	0	572.528	76	68	1143	68	1	809	89.9	5.47	High	High	High	High	High	High	7.68383e+07	1.01894e+08	9.86152e+07	5.87739e+08	5.41629e+08	5.87951e+08
cbdbA287	High	Master Protein	Q3ZZA0	Ribonucleotide reductase OS=Dehalococcoides mccartyi (strain CBDB1) GN=nrdA PE=4 SV=1	FALSE	0	561.021	67	56	1160	54	1	761	83	7.23	High	High	High	High	High	High	8.04254e+07	1.05184e+08	1.23962e+08	5.93118e+08	4.31577e+08	4.89244e+08
cbdbA1728	High	Master Protein	Q3ZZX1	DNA gyrase subunit A OS=Dehalococcoides mccartyi (strain CBDB1) GN=gyrA PE=3 SV=1	FALSE	0	551.506	57	54	871	54	1	809	89.4	6.23	High	High	High	High	High	High	1.13347e+08	1.26621e+08	1.14856e+08	6.45168e+08	6.24656e+08	5.4094e+08
cbdbA65	High	Master Protein	Q3ZWC3	Alanine--tRNA ligase OS=Dehalococcoides mccartyi (strain CBDB1) GN=alaS PE=3 SV=1	FALSE	0	547.896	72	62	731	62	1	871	96.5	6.19	High	High	High	High	High	High	3.30566e+07	2.38203e+07	2.86082e+07	3.40824e+08	4.0005e+08	2.45205e+08
cbdbA171	High	Master Protein	Q3ZWM9	Putative [Fe] hydrogenase, large subunit HymC OS=Dehalococcoides mccartyi (strain CBDB1) GN=hymC PE=4 SV=1	FALSE	0	545.566	75	49	1178	49	1	573	62.6	6.89	High	High	High	High	High	High	1.23759e+08	1.54502e+08	1.41801e+08	7.62837e+08	6.29784e+08	5.77179e+08
cbdbA143	High	Master Protein	Q3ZWK4	Pyridine nucleotide-disulphide oxidoreductase family protein OS=Dehalococcoides mccartyi (strain CBDB1) GN=cbdbA143 PE=4 SV=1	FALSE	0	540.604	75	49	1220	49	1	600	65	7.74	High	High	High	High	High	High	2.42002e+08	3.12472e+08	2.32974e+08	1.19225e+09	9.80048e+08	1.07791e+09
cbdbA811	High	Master Protein	Q3ZXI2	Ketol-acid reductoisomerase OS=Dehalococcoides mccartyi (strain CBDB1) GN=ilvC PE=3 SV=1	FALSE	0	532.506	91	36	2483	36	1	332	36.4	5.29	High	High	High	High	High	High	5.24056e+08	5.88756e+08	4.82619e+08	3.85998e+09	4080946083	2.52565e+09
cbdbA568	High	Master Protein	Q3ZWW6	GTPase domain protein OS=Dehalococcoides mccartyi (strain CBDB1) GN=cbdbA568 PE=4 SV=1	FALSE	0	529.404	87	41	1351	41	1	392	43.8	8.34	High	High	High	High	High	High	4.83646e+08	5.91112e+08	6.45478e+08	3.46639e+09	3.30504e+09	2.7803e+09
cbdbA202	High	Master Protein	Q3ZWQ1	Leucine--tRNA ligase OS=Dehalococcoides mccartyi (strain CBDB1) GN=leuS PE=3 SV=1	FALSE	0	528.179	67	53	664	53	1	813	92.9	6.77	High	High	High	High	High	High	5.86629e+07	8.0627e+07	3.74513e+07	3.42728e+08	3.13254e+08	3.15989e+08
cbdbA943	High	Master Protein	Q3ZXU7	Myo-inositol-1-phosphate synthase family protein OS=Dehalococcoides mccartyi (strain CBDB1) GN=cbdbA943 PE=4 SV=1	FALSE	0	524.184	86	38	1765	38	1	370	41.1	7.66	High	High	High	High	High	High	4.07643e+08	5.8737e+08	7.24038e+08	4.75728e+09	4.63546e+09	3.54468e+09
cbdbA597	High	Master Protein	Q3ZWZ1	Hydrogenase, group 3, VhuA subunit OS=Dehalococcoides mccartyi (strain CBDB1) GN=cbdbA597 PE=3 SV=1	FALSE	0	518.297	86	53	1234	53	1	479	53.2	6.55	High	High	High	High	High	High	1.61753e+08	1.97522e+08	2.15269e+08	1.38982e+09	1.18904e+09	1.26332e+09
cbdbA794	High	Master Protein	Q3ZXJ6	Iron-regulated ABC transporter, subunit SufB-related OS=Dehalococcoides mccartyi (strain CBDB1) GN=sufB PE=4 SV=1	FALSE	0	514.772	97	35	982	35	1	411	45.3	5.94	High	High	High	High	High	High	1.57179e+08	1.8916e+08	1.62291e+08	1.05271e+09	9.98582e+08	7.88981e+08
cbdbA1381	High	Master Protein	Q3ZYX9	Bifunctional purine biosynthesis protein PurH OS=Dehalococcoides mccartyi (strain CBDB1) GN=purH PE=3 SV=1	FALSE	0	511.771	81	42	1004	42	1	513	56.2	6.9	High	High	High	High	High	High	1.02316e+08	1.52968e+08	9.35793e+07	7.69144e+08	8.16533e+08	6.00052e+08
cbdbA1118	High	Master Protein	Q3ZYB7	Carbamoyl-phosphate synthase, large subunit OS=Dehalococcoides mccartyi (strain CBDB1) GN=carB PE=3 SV=1	FALSE	0	508.653	64	58	850	58	1	1089	118.5	5.34	High	High	High	High	High	High	6.24239e+07	7.73158e+07	8.1798e+07	4.25618e+08	3.8047e+08	3.30247e+08
cbdbA728	High	Master Protein	Q3ZXB3	Uncharacterized protein OS=Dehalococcoides mccartyi (strain CBDB1) GN=cbdbA728 PE=4 SV=1	FALSE	0	499.493	72	44	1270	44	1	468	48.1	5.52	High	High	High	High	High	High	2.57738e+08	3.074e+08	3.31487e+08	1.30694e+09	1.04819e+09	9.60473e+08
cbdbA846	High	Master Protein	Q3ZXP7	Hydrogenase subunit HymB OS=Dehalococcoides mccartyi (strain CBDB1) GN=cbdbA846 PE=4 SV=1	FALSE	0	496.974	84	49	925	49	1	640	69.6	6.95	High	High	High	High	High	High	1.38646e+08	1.43267e+08	1.19849e+08	7.30125e+08	5.75463e+08	5.03068e+08
cbdbA808	High	Master Protein	Q3ZXI3	2-isopropylmalate synthase OS=Dehalococcoides mccartyi (strain CBDB1) GN=leuA PE=3 SV=1	FALSE	0	493.426	89	51	916	51	1	505	54.8	5.69	High	High	High	High	High	High	1.00896e+08	1.4752e+08	1.52233e+08	7.08627e+08	6.77071e+08	5.37688e+08
cbdbA1196	High	Master Protein	Q3ZYF0	Arginine--tRNA ligase OS=Dehalococcoides mccartyi (strain CBDB1) GN=argS PE=3 SV=1	FALSE	0	490.514	91	46	580	46	1	556	61.8	5.76	High	High	High	High	High	High	3.89961e+07	4.55966e+07	4.31515e+07	3.40498e+08	3.70224e+08	3.03211e+08
cbdbA432	High	Master Protein	Q3ZZN0	Phospho-2-dehydro-3-deoxyheptonate aldolase OS=Dehalococcoides mccartyi (strain CBDB1) GN=aroF PE=4 SV=1	FALSE	0	488.449	81	41	1742	41	1	351	38.5	6.21	High	High	High	High	High	High	7.68975e+08	8.78658e+08	7.38843e+08	7.31399e+09	6.74959e+09	5.54197e+09
cbdbA578	High	Master Protein	Q3ZX07	Uncharacterized protein OS=Dehalococcoides mccartyi (strain CBDB1) GN=cbdbA578 PE=4 SV=1	FALSE	0	479.23	80	46	582	46	1	442	50.6	7.66	High	High	High	High	High	High	9.35152e+07	1.46833e+08	1.4052e+08	1.17187e+09	1.23788e+09	8.80485e+08
cbdbA1368	High	Master Protein	Q3ZYU4	Conserved domain protein OS=Dehalococcoides mccartyi (strain CBDB1) GN=cbdbA1368 PE=4 SV=1	FALSE	0	471.1	46	30	8745	30	1	1015	106.8	4.68	High	High	High	High	High	High	6.43993e+09	7.25521e+09	4.6579e+09	3.33228e+10	2.7435e+10	2.47616e+10
cbdbA477	High	Master Protein	Q3ZZN6	Adenosylhomocysteinase OS=Dehalococcoides mccartyi (strain CBDB1) GN=ahcY PE=3 SV=1	FALSE	0	466.471	91	37	976	37	1	418	45.3	6.67	High	High	High	High	High	High	3.13875e+08	4.08019e+08	3.82975e+08	2013863353	1.93389e+09	1.79497e+09
cbdbA726	High	Master Protein	Q3ZXB5	Threonine--tRNA ligase OS=Dehalococcoides mccartyi (strain CBDB1) GN=thrS PE=3 SV=1	FALSE	0	462.609	73	47	657	47	1	582	67	6.35	High	High	High	High	High	High	7.99079e+07	8.99932e+07	9.81621e+07	6.22154e+08	5.9464e+08	4.8144e+08
cbdbA947	High	Master Protein	Q3ZXU3	Translation initiation factor IF-2 OS=Dehalococcoides mccartyi (strain CBDB1) GN=infB PE=3 SV=1	FALSE	0	460.799	68	50	576	50	1	593	64	6.15	High	High	High	High	High	High	4.22622e+07	5.19585e+07	4.49295e+07	4.34318e+08	4.43566e+08	3.77549e+08
cbdbA573	High	Master Protein	Q3ZX11	Enolase OS=Dehalococcoides mccartyi (strain CBDB1) GN=eno PE=3 SV=1	FALSE	0	459.438	83	35	785	35	1	428	46.2	6.28	High	High	High	High	High	High	4.34185e+07	4.3504e+07	3.32969e+07	4.11897e+08	4.1093e+08	4.51082e+08
cbdbA652	High	Master Protein	Q3ZX45	Carbon monoxide dehydrogenase, alpha subunit OS=Dehalococcoides mccartyi (strain CBDB1) GN=codH PE=4 SV=1	FALSE	0	457.302	68	43	992	43	1	733	80.1	5.17	High	High	High	High	High	High	9.7177e+07	1.35015e+08	1.15067e+08	8.09635e+08	8.06877e+08	6.98936e+08
cbdbA310	High	Master Protein	Q3ZZD0	Proline--tRNA ligase OS=Dehalococcoides mccartyi (strain CBDB1) GN=proS PE=3 SV=1	FALSE	0	453.713	78	46	790	46	1	569	63	6	High	High	High	High	High	High	5.26586e+07	7.4625e+07	7.47188e+07	6.26274e+08	6.68325e+08	4.62627e+08
cbdbA1702	High	Master Protein	Q3ZW82	Ribonuclease Y OS=Dehalococcoides mccartyi (strain CBDB1) GN=rny PE=3 SV=1	FALSE	0	451.803	67	42	669	42	1	527	59.1	5.94	High	High	High	High	High	High	4.43953e+07	8.87939e+07	3.62577e+07	4.63545e+08	3.65067e+08	3.97967e+08
cbdbA1520	High	Master Protein	Q3ZZ78	Uncharacterized protein OS=Dehalococcoides mccartyi (strain CBDB1) GN=cbdbA1520 PE=4 SV=1	FALSE	0	451.264	82	45	916	45	1	427	47.1	6.58	High	High	High	High	High	High	1.15534e+08	1.93964e+08	1.62635e+08	9.35716e+08	8.09103e+08	8.16673e+08
cbdbA431	High	Master Protein	Q3ZZN1	3-dehydroquinate synthase OS=Dehalococcoides mccartyi (strain CBDB1) GN=aroB PE=3 SV=1	FALSE	0	448.605	95	35	1287	35	1	359	39	6.74	High	High	High	High	High	High	4.94811e+08	6.84017e+08	6.21686e+08	3.16412e+09	3.07827e+09	2.57801e+09
cbdbA681	High	Master Protein	Q3ZX69	Pyruvic-ferredoxin oxidoreductase, alpha subunit OS=Dehalococcoides mccartyi (strain CBDB1) GN=porA PE=4 SV=1	FALSE	0	444.849	78	35	1016	35	1	390	42.7	5.08	High	High	High	High	High	High	2.78805e+08	2.64517e+08	2.5204e+08	1.78964e+09	1.78418e+09	1.50329e+09
cbdbA390	High	Master Protein	Q3ZZG3	Serine hydroxymethyltransferase OS=Dehalococcoides mccartyi (strain CBDB1) GN=glyA PE=3 SV=1	FALSE	0	439.135	74	34	1257	34	1	415	45.2	7.59	High	High	High	High	High	High	2.02114e+08	2.46823e+08	2.3875e+08	1.22775e+09	1.31147e+09	1.22612e+09
cbdbA476	High	Master Protein	Q3ZZN7	S-adenosylmethionine synthase OS=Dehalococcoides mccartyi (strain CBDB1) GN=metK PE=3 SV=1	FALSE	0	438.701	74	36	1310	36	1	406	44.4	6.54	High	High	High	High	High	High	3.34342e+08	3.90644e+08	5.04916e+08	2.2045e+09	2.25235e+09	1.88655e+09
cbdbA329	High	Master Protein	Q3ZZB5	IMP dehydrogenase family protein OS=Dehalococcoides mccartyi (strain CBDB1) GN=cbdbA329 PE=3 SV=1	FALSE	0	429.295	88	30	1078	30	1	381	40.4	7.4	High	High	High	High	High	High	1.20609e+08	1.65596e+08	1.02814e+08	8.78053e+08	8.56453e+08	7.99494e+08
cbdbA674	High	Master Protein	Q3ZX75	DNA topoisomerase 1 OS=Dehalococcoides mccartyi (strain CBDB1) GN=topA PE=3 SV=1	FALSE	0	416.452	66	51	703	51	1	703	79.8	9.03	High	High	High	High	High	High	7.94969e+07	8.4916e+07	8.73957e+07	5.33281e+08	4.79857e+08	4.30323e+08
cbdbA949	High	Master Protein	Q3ZXU1	N utilization substance protein A OS=Dehalococcoides mccartyi (strain CBDB1) GN=nusA PE=3 SV=1	FALSE	0	414.446	71	52	880	52	1	491	53.7	8.18	High	High	High	High	High	High	1.2263e+08	1.49267e+08	1.73667e+08	6.59686e+08	6.86088e+08	6.06694e+08
cbdbA131	High	Master Protein	Q3ZWL3	Putative Ni/Fe hydrogenase, iron-sulfur cluster-binding subunit OS=Dehalococcoides mccartyi (strain CBDB1) GN=cbdbA131 PE=4 SV=1	FALSE	0	412.38	78	28	1163	28	1	267	30.4	6.21	High	High	High	High	High	High	6.00267e+08	6.9948e+08	5.14013e+08	3.20446e+09	4.00446e+09	2.88914e+09
cbdbA1050	High	Master Protein	Q3ZY35	Glutamine synthetase, type I OS=Dehalococcoides mccartyi (strain CBDB1) GN=glnA PE=3 SV=1	FALSE	0	412.165	80	35	808	35	1	443	50.3	5.76	High	High	High	High	High	High	5.30493e+07	6.32136e+07	9.94251e+07	6.53535e+08	7.85401e+08	5.82454e+08
cbdbA393	High	Master Protein	Q3ZZI4	DNA translocase FtsK OS=Dehalococcoides mccartyi (strain CBDB1) GN=ftsK PE=4 SV=1	FALSE	0	410.195	59	46	587	46	1	816	89	9.14	High	High	High	High	High	High	5.27033e+07	6.57357e+07	4.46485e+07	2.34327e+08	1.74894e+08	2.26067e+08
cbdbA4	High	Master Protein	Q3ZW87	DNA gyrase subunit B OS=Dehalococcoides mccartyi (strain CBDB1) GN=gyrB PE=3 SV=1	FALSE	0	407.165	64	39	550	39	1	642	71.2	7.09	High	High	High	High	High	High	6.03738e+07	5.49854e+07	7.64318e+07	4.55729e+08	5.06931e+08	3.16285e+08
cbdbA803	High	Master Protein	Q3ZXI8	2-isopropylmalate synthase OS=Dehalococcoides mccartyi (strain CBDB1) GN=cbdbA803 PE=3 SV=1	FALSE	0	406.368	74	41	749	41	1	533	58.6	5.97	High	High	High	High	High	High	1.5804e+08	2.10019e+08	1.9692e+08	8.31707e+08	7.97344e+08	7.18932e+08
cbdbA1001	High	Master Protein	Q3ZXY4	Probable cytosol aminopeptidase OS=Dehalococcoides mccartyi (strain CBDB1) GN=pepA PE=3 SV=1	FALSE	0	405.535	70	30	929	30	1	497	52.9	5.35	High	High	High	High	High	High	1.26399e+08	1.51972e+08	1.95751e+08	8.29762e+08	9.34935e+08	8.1548e+08
cbdbA939	High	Master Protein	Q3ZXV0	Adenylosuccinate synthetase OS=Dehalococcoides mccartyi (strain CBDB1) GN=purA PE=3 SV=1	FALSE	0	401.759	78	39	838	39	1	423	46.3	6.15	High	High	High	High	High	High	8.77111e+07	1.14629e+08	7.45414e+07	7.0621e+08	6.98368e+08	6.32587e+08
cbdbA322	High	Master Protein	Q3ZZC1	30S ribosomal protein S2 OS=Dehalococcoides mccartyi (strain CBDB1) GN=rpsB PE=3 SV=1	FALSE	0	401.6	88	33	1084	33	1	245	27.5	7.81	High	High	High	High	High	High	2.73717e+08	3.25099e+08	3.50392e+08	2.02331e+09	2.09653e+09	1.66952e+09
cbdbA1126	High	Master Protein	Q3ZYB0	Acetyl-CoA synthetase OS=Dehalococcoides mccartyi (strain CBDB1) GN=acs PE=4 SV=1	FALSE	0	401.549	69	38	882	38	1	652	73.1	6.47	High	High	High	High	High	High	2.29885e+08	2.45623e+08	2.31628e+08	1.08474e+09	1.40342e+09	1.14358e+09
cbdbA466	High	Master Protein	Q3ZZP6	DNA-directed RNA polymerase subunit alpha OS=Dehalococcoides mccartyi (strain CBDB1) GN=rpoA PE=3 SV=1	FALSE	0	400.595	70	34	1088	34	1	330	36.5	4.83	High	High	High	High	High	High	1.97194e+08	2.39849e+08	2.43242e+08	1.42273e+09	1.2185e+09	8.87213e+08
cbdbA11	High	Master Protein	Q3ZWB3	Branched-chain amino acid aminotransferase OS=Dehalococcoides mccartyi (strain CBDB1) GN=ilvE PE=3 SV=1	FALSE	0	389.666	88	31	705	31	1	306	34.6	6.35	High	High	High	High	High	High	9.96517e+07	1.31034e+08	1.27287e+08	8.29392e+08	8.79928e+08	6.56122e+08
cbdbA339	High	Master Protein	Q3ZZF9	ATP-dependent zinc metalloprotease FtsH OS=Dehalococcoides mccartyi (strain CBDB1) GN=ftsH PE=3 SV=1	FALSE	0	388.771	54	39	670	39	1	608	66.8	5.68	High	High	High	High	High	High	1.1784e+08	1.58581e+08	8.21644e+07	5.6688e+08	4.83068e+08	5.21952e+08
cbdbA384	High	Master Protein	Q3ZZG9	Valine--tRNA ligase OS=Dehalococcoides mccartyi (strain CBDB1) GN=valS PE=3 SV=1	FALSE	0	387.425	56	47	566	47	1	880	100.1	5.87	High	High	High	High	High	High	4.44805e+07	6.16926e+07	6.35447e+07	2.93392e+08	2.82111e+08	2.71356e+08
cbdbA392	High	Master Protein	Q3ZZG1	Metallo-beta-lactamase family protein OS=Dehalococcoides mccartyi (strain CBDB1) GN=cbdbA392 PE=4 SV=1	FALSE	0	386.765	74	39	522	39	1	551	60.4	7.68	High	High	High	High	High	High	6.55928e+07	8.60064e+07	6.00454e+07	6.09071e+08	5.43133e+08	4.57245e+08
cbdbA821	High	Master Protein	Q3ZXM1	Adenylosuccinate lyase OS=Dehalococcoides mccartyi (strain CBDB1) GN=purB PE=3 SV=1	FALSE	0	383.572	70	35	501	35	1	451	51.1	6.95	High	High	High	High	High	High	9.22483e+07	8.93812e+07	9.38502e+07	6.55458e+08	5.61566e+08	4.61632e+08
cbdbA536	High	Master Protein	Q3ZZT9	ATP synthase subunit alpha OS=Dehalococcoides mccartyi (strain CBDB1) GN=atpA PE=3 SV=1	FALSE	0	382.897	57	44	1430	44	1	503	54.1	6.62	High	High	High	High	High	High	5.72308e+08	6.527e+08	9.68115e+08	3.02486e+09	3.17174e+09	2.62016e+09
cbdbA1369	High	Master Protein	Q3ZYU3	Transcription termination factor Rho OS=Dehalococcoides mccartyi (strain CBDB1) GN=rho PE=3 SV=1	FALSE	0	380.044	79	42	749	42	1	424	47.5	7.96	High	High	High	High	High	High	8.9171e+07	1.25107e+08	8.81613e+07	6.68087e+08	6.86718e+08	5.72414e+08
cbdbA285	High	Master Protein	Q3ZZA2	Cell division protein FtsZ OS=Dehalococcoides mccartyi (strain CBDB1) GN=ftsZ PE=3 SV=1	FALSE	0	376.548	90	35	1126	35	1	376	39.5	5.53	High	High	High	High	High	High	2.8612e+08	2.24264e+08	2.85476e+08	1.25863e+09	1.14285e+09	1.00047e+09
cbdbA1103	High	Master Protein	Q3ZY84	Riboflavin biosynthesis protein RibBA OS=Dehalococcoides mccartyi (strain CBDB1) GN=ribA PE=3 SV=1	FALSE	0	372.35	79	35	702	35	1	403	44.3	6.21	High	High	High	High	High	High	9.10076e+07	1.05143e+08	8.70942e+07	7.79666e+08	9.12369e+08	5.81419e+08
cbdbA1145	High	Master Protein	Q3ZYE1	DNA polymerase III subunit beta OS=Dehalococcoides mccartyi (strain CBDB1) GN=dnaN PE=4 SV=1	FALSE	0	369.751	80	30	1460	30	1	378	40.6	5.5	High	High	High	High	High	High	2.56022e+08	2.96723e+08	3.83822e+08	2.61449e+09	2.93076e+09	2.20875e+09
cbdbA623	High	Master Protein	Q3ZX19	Cell division protein ftsA OS=Dehalococcoides mccartyi (strain CBDB1) GN=ftsA PE=3 SV=1	FALSE	0	356.533	85	32	866	32	1	400	43	6	High	High	High	High	High	High	2.98256e+08	3.89439e+08	3.23647e+08	2.0669e+09	1.65257e+09	1.50332e+09
cbdbA1392	High	Master Protein	Q3ZYW9	10 kDa chaperonin OS=Dehalococcoides mccartyi (strain CBDB1) GN=groS PE=3 SV=1	FALSE	0	356.381	93	22	2418	22	1	98	10.7	7.25	High	High	High	High	High	High	1.38271e+09	2.61037e+09	1.57377e+09	1.40707e+10	1.56639e+10	7.59811e+09
cbdbA829	High	Master Protein	Q3ZXL5	ATP phosphoribosyltransferase regulatory subunit OS=Dehalococcoides mccartyi (strain CBDB1) GN=hisZ PE=3 SV=1	FALSE	0	354.831	74	30	718	30	1	412	46.1	4.61	High	High	High	High	High	High	1.87448e+08	2.2616e+08	1.57539e+08	1.25301e+09	1.18548e+09	1.09183e+09
cbdbA139	High	Master Protein	Q3ZWK7	Oxaloacetate decarboxylase, alpha subunit OS=Dehalococcoides mccartyi (strain CBDB1) GN=oadA PE=4 SV=1	FALSE	0	353.948	61	40	582	40	1	582	63.4	5.64	High	High	High	High	High	High	4.36561e+07	5.32662e+07	2.08287e+07	4.28948e+08	5.36635e+08	3.10036e+08
cbdbA804	High	Master Protein	Q3ZXI7	3-isopropylmalate dehydrogenase OS=Dehalococcoides mccartyi (strain CBDB1) GN=leuB PE=3 SV=1	FALSE	0	352.297	76	37	725	37	1	365	39.3	8.41	High	High	High	High	High	High	8.88861e+07	1.18485e+08	8.26162e+07	9.83092e+08	1.01009e+09	8.49762e+08
cbdbA521	High	Master Protein	Q3ZZV3	UvrABC system protein A OS=Dehalococcoides mccartyi (strain CBDB1) GN=uvrA PE=3 SV=1	FALSE	0	350.852	68	52	465	52	1	944	103.2	6.95	High	High	High	High	High	High	1.37101e+07	2.1947e+07	1.47128e+07	1.16446e+08	1.01205e+08	1.11542e+08
cbdbA106	High	Master Protein	Q3ZWI1	Restriction enzymes type I helicase subunit OS=Dehalococcoides mccartyi (strain CBDB1) GN=cbdbA106 PE=4 SV=1	FALSE	0	350.552	55	51	246	51	1	994	115.5	5.85	High	High	High	High	High	High	1.01922e+07	1.00987e+07	1.11515e+07	193477037	1.76582e+08	1.14245e+08
cbdbA325	High	Master Protein	Q3ZZB9	Phosphoribosylformylglycinamidine synthase subunit PurL OS=Dehalococcoides mccartyi (strain CBDB1) GN=purL PE=3 SV=1	FALSE	0	350.189	56	40	390	40	1	953	104	5.5	High	High	High	High	High	High	2.01458e+07	3.05325e+07	3.16083e+07	1.43617e+08	1.51501e+08	1.05151e+08
cbdbA663	High	Master Protein	Q3ZX84	Aspartate--tRNA(Asp/Asn) ligase OS=Dehalococcoides mccartyi (strain CBDB1) GN=aspS PE=3 SV=1	FALSE	0	348.895	70	38	424	38	1	598	66.9	5.92	High	High	High	High	High	High	4.67643e+07	6.91716e+07	6.40571e+07	3.3228e+08	3.29508e+08	3.09674e+08
cbdbA817	High	Master Protein	Q3ZXH7	GMP synthase [glutamine-hydrolyzing] OS=Dehalococcoides mccartyi (strain CBDB1) GN=guaA PE=3 SV=1	FALSE	0	348.808	77	37	425	37	1	533	59.6	6.2	High	High	High	High	High	High	2.10777e+07	4.51916e+07	2.00109e+07	347962998	2.76503e+08	3.00196e+08
cbdbA719	High	Master Protein	Q3ZXC3	Phosphoglycerate kinase OS=Dehalococcoides mccartyi (strain CBDB1) GN=pgk PE=3 SV=1	FALSE	0	348.68	93	34	671	34	1	397	43.1	5.62	High	High	High	High	High	High	3.8136e+07	4.61877e+07	4.22248e+07	4.92921e+08	4.65565e+08	3.72939e+08
cbdbA1055	High	Master Protein	Q3ZY30	Archaeal-type glutamate synthase [NADPH] OS=Dehalococcoides mccartyi (strain CBDB1) GN=cbdbA1055 PE=3 SV=1	FALSE	0	348.636	83	39	559	39	1	500	53.9	8.05	High	High	High	High	High	High	7.39769e+07	9.76891e+07	9.89333e+07	5.30141e+08	6.53408e+08	5.24175e+08
cbdbA718	High	Master Protein	Q3ZXC4	Putative phosphoglycerate mutase,2,3-bisphosphoglycerate-independent OS=Dehalococcoides mccartyi (strain CBDB1) GN=cbdbA718 PE=4 SV=1	FALSE	0	345.115	67	26	616	26	1	401	43.2	6.79	High	High	High	High	High	High	6.84547e+07	8.90353e+07	1.07656e+08	6.55882e+08	6.38193e+08	4.99005e+08
cbdbA1643	High	Master Protein	Q3ZW41	Aspartyl/glutamyl-tRNA(Asn/Gln) amidotransferase subunit B OS=Dehalococcoides mccartyi (strain CBDB1) GN=gatB PE=3 SV=1	FALSE	0	343.23	71	35	429	35	1	492	54.7	5.62	High	High	High	High	High	High	2.05034e+07	2.67506e+07	2.08016e+07	2.80884e+08	2.19009e+08	2.25578e+08
cbdbA849	High	Master Protein	Q3ZXP5	Putative hydrogenase subunit OS=Dehalococcoides mccartyi (strain CBDB1) GN=cbdbA849 PE=4 SV=1	FALSE	0	342.649	71	38	556	38	1	461	50.3	7.5	High	High	High	High	High	High	1.04972e+08	1.39909e+08	1.36421e+08	4.64107e+08	4.43588e+08	4.7295e+08
cbdbA685	High	Master Protein	Q3ZX65	Putative [Fe] hydrogenase, HymC subunit OS=Dehalococcoides mccartyi (strain CBDB1) GN=hymC PE=4 SV=1	FALSE	0	338.713	93	29	984	29	1	240	26.6	7.74	High	High	High	High	High	High	2.27201e+08	2.47735e+08	2.1903e+08	1.40317e+09	1.27856e+09	1.13071e+09
cbdbA622	High	Master Protein	Q3ZX20	Cell division protein FtsZ OS=Dehalococcoides mccartyi (strain CBDB1) GN=ftsZ PE=3 SV=1	FALSE	0	332.572	76	24	590	24	1	376	39.5	6.43	High	High	High	High	High	High	1.45533e+08	1.18058e+08	3.96542e+07	5.54572e+08	2.79637e+08	3.4783e+08
cbdbA988	High	Master Protein	Q3ZXZ5	Phenylacetate-coenzyme A ligase OS=Dehalococcoides mccartyi (strain CBDB1) GN=cbdbA988 PE=3 SV=1	FALSE	0	329.423	68	36	607	36	1	439	49	6.16	High	High	High	High	High	High	7.22215e+07	9.60732e+07	9.16805e+07	5.51304e+08	5.58874e+08	5.73106e+08
cbdbA1708	High	Master Protein	Q3ZW76	Homocitrate synthase OS=Dehalococcoides mccartyi (strain CBDB1) GN=cbdbA1708 PE=4 SV=1	FALSE	0	328.1	83	32	516	32	1	415	45.6	5.76	High	High	High	High	High	High	9.46502e+07	1.14315e+08	1.192e+08	6.7166e+08	7.95873e+08	6.18584e+08
cbdbA971	High	Master Protein	Q3ZXW5	Conserved domain protein OS=Dehalococcoides mccartyi (strain CBDB1) GN=cbdbA971 PE=4 SV=1	FALSE	0	326.906	83	30	694	30	1	270	30	5.02	High	High	High	High	High	High	1.37582e+08	1.49541e+08	2.15207e+08	1.9523e+09	1.8979e+09	1.35981e+09
cbdbA408	High	Master Protein	Q3ZZJ8	Putative isocitrate dehydrogenase OS=Dehalococcoides mccartyi (strain CBDB1) GN=cbdbA408 PE=3 SV=1	FALSE	0	324.856	72	28	653	28	1	359	39.3	7.28	High	High	High	High	High	High	1.12203e+08	1.66197e+08	1.02978e+08	1.20575e+09	8.64137e+08	1.05961e+09
cbdbA1336	High	Master Protein	Q3ZYS3	Nicotinate-nucleotide pyrophosphorylase OS=Dehalococcoides mccartyi (strain CBDB1) GN=nadC PE=3 SV=1	FALSE	0	323.264	93	26	882	26	1	286	30.6	5.73	High	High	High	High	High	High	2.41398e+08	3.0082e+08	3.46421e+08	1.92246e+09	1.8457e+09	1.44352e+09
cbdbA445	High	Master Protein	Q3ZZL8	30S ribosomal protein S3 OS=Dehalococcoides mccartyi (strain CBDB1) GN=rpsC PE=3 SV=1	FALSE	0	318.031	81	32	845	32	1	278	30.9	9.48	High	High	High	High	High	High	2.1841e+08	2.40082e+08	3.32867e+08	1.26144e+09	1.55946e+09	1.2525e+09
cbdbA1012	High	Master Protein	Q3ZY20	Isoleucine--tRNA ligase OS=Dehalococcoides mccartyi (strain CBDB1) GN=ileS PE=3 SV=1	FALSE	0	314.491	50	43	369	43	1	1014	116.1	6.06	High	High	High	High	High	High	3.57688e+07	4.40393e+07	2.18401e+07	1.72992e+08	2.26321e+08	1.19872e+08
cbdbA793	High	Master Protein	Q3ZXJ7	Iron-regulated ABC transporter, atp-binding protein, SufC OS=Dehalococcoides mccartyi (strain CBDB1) GN=sufC PE=4 SV=1	FALSE	0	314.466	72	29	433	29	1	251	28	7.05	High	High	High	High	High	High	2.16142e+07	2.56443e+07	3.29737e+07	2.22562e+08	2.89658e+08	1.79922e+08
cbdbA525	High	Master Protein	Q3ZZU9	RNA polymerase sigma factor SigA OS=Dehalococcoides mccartyi (strain CBDB1) GN=rpoD PE=3 SV=1	FALSE	0	313.87	68	31	324	31	1	520	59	5.03	High	High	High	High	High	High	6.25288e+07	6.89937e+07	4.61412e+07	2.32867e+08	2.4583e+08	1.95191e+08
cbdbA1302	High	Master Protein	Q3ZYQ7	Type II secretion system protein GspE OS=Dehalococcoides mccartyi (strain CBDB1) GN=gspE PE=4 SV=1	FALSE	0	313.317	50	37	382	37	1	778	86.1	6.35	High	High	High	High	High	High	3.25709e+07	3.55484e+07	5.24408e+07	2.35427e+08	243949093	1.86273e+08
cbdbA409	High	Master Protein	Q3ZZJ7	Malate dehydrogenase OS=Dehalococcoides mccartyi (strain CBDB1) GN=mdh PE=3 SV=1	FALSE	0	311.663	94	25	682	25	1	307	32	7.84	High	High	High	High	High	High	8.40139e+07	1.09909e+08	8.77391e+07	9.02122e+08	8.54457e+08	7.47286e+08
cbdbA1669	High	Master Protein	Q3ZW67	Peroxiredoxin OS=Dehalococcoides mccartyi (strain CBDB1) GN=cbdbA1669 PE=3 SV=1	FALSE	0	308.419	74	20	459	20	1	213	24.1	5.29	High	High	High	High	High	High	3.87731e+07	1.04098e+08	1.40992e+08	9.08719e+08	1.13339e+09	8.53389e+08
cbdbA682	High	Master Protein	Q3ZX68	Pyruvic-ferredoxin oxidoreductase, beta subunit OS=Dehalococcoides mccartyi (strain CBDB1) GN=porB PE=4 SV=1	FALSE	0	306.999	91	23	544	23	1	313	34.4	8.15	High	High	High	High	High	High	2.1314e+08	2.78857e+08	3.57977e+08	1.58156e+09	1.5348e+09	1.34455e+09
cbdbA334	High	Master Protein	Q3ZZB2	Methionine--tRNA ligase OS=Dehalococcoides mccartyi (strain CBDB1) GN=metG PE=3 SV=1	FALSE	0	303.287	72	37	406	37	1	553	63.3	6.48	High	High	High	High	High	High	3.92438e+07	4.553e+07	4.43258e+07	2.3679e+08	2.2957e+08	1.61836e+08
cbdbA1124	High	Master Protein	Q3ZYB2	Uncharacterized protein OS=Dehalococcoides mccartyi (strain CBDB1) GN=cbdbA1124 PE=4 SV=1	FALSE	0	302.931	66	22	383	22	1	422	47.2	4.7	High	High	High	High	High	High	3.05287e+07	4.22525e+07	3.38878e+07	4.61816e+08	4.18397e+08	3.71474e+08
cbdbA439	High	Master Protein	Q3ZZM4	50S ribosomal protein L3 OS=Dehalococcoides mccartyi (strain CBDB1) GN=rplC PE=3 SV=1	FALSE	0	302.835	82	28	765	28	1	205	21.8	9.69	High	High	High	High	High	High	2.00506e+08	2.33034e+08	1.90682e+08	9.04414e+08	1.00759e+09	968133754
cbdbA50	High	Master Protein	Q3ZWD3	Uncharacterized protein OS=Dehalococcoides mccartyi (strain CBDB1) GN=cbdbA50 PE=4 SV=1	FALSE	0	302.405	97	20	509	20	1	177	19.9	4.88	High	High	High	High	High	High	1.1177e+07	1.60883e+07	1.40051e+07	5.98397e+08	6.02356e+08	4.6573e+08
cbdbA815	High	Master Protein	Q3ZXH9	Dihydroxy-acid dehydratase OS=Dehalococcoides mccartyi (strain CBDB1) GN=ilvD PE=3 SV=1	FALSE	0	300.25	62	31	492	31	1	555	58.8	6.79	High	High	High	High	High	High	1.25125e+08	1.67026e+08	1.84325e+08	6.21342e+08	6.90298e+08	5.31053e+08
cbdbA954	High	Master Protein	Q3ZXY0	50S ribosomal protein L7/L12 OS=Dehalococcoides mccartyi (strain CBDB1) GN=rplL PE=3 SV=1	FALSE	0	298.093	100	25	1586	25	1	123	12.7	5.01	High	High	High	High	High	High	6.75855e+08	5.82179e+08	5.73818e+08	3.68257e+09	4.00893e+09	3.4083e+09
cbdbA82	High	Master Protein	Q3ZWF7	Sensor histidine kinase OS=Dehalococcoides mccartyi (strain CBDB1) GN=rdhC PE=4 SV=1	FALSE	0	297.576	64	39	452	39	1	501	56.3	8.43	High	High	High	High	High	High	2.42507e+07	3.12765e+07	2.8517e+07	3.9313e+08	3.45548e+08	2.93879e+08
cbdbA921	High	Master Protein	Q3ZXT9	3-oxoacyl-[acyl-carrier-protein] synthase 2 OS=Dehalococcoides mccartyi (strain CBDB1) GN=fabF PE=3 SV=1	FALSE	0	297.104	74	25	485	25	1	422	44.2	5.59	High	High	High	High	High	High	7.4341e+07	7.45849e+07	6.05773e+07	7.7632e+08	6.82421e+08	5.66275e+08
cbdbA765	High	Master Protein	Q3ZXH5	Glycine--tRNA ligase OS=Dehalococcoides mccartyi (strain CBDB1) GN=glyS PE=3 SV=1	FALSE	0	294.199	80	34	685	34	1	433	50	6.09	High	High	High	High	High	High	9.56323e+07	1.16164e+08	1.13857e+08	6.17576e+08	733870449	5.59526e+08
cbdbA1731	High	Master Protein	Q3ZZW8	Aspartokinase OS=Dehalococcoides mccartyi (strain CBDB1) GN=metL PE=3 SV=1	FALSE	0	293.831	83	27	706	27	1	405	43.1	5.85	High	High	High	High	High	High	1.46093e+08	1.862e+08	2.07214e+08	1.01423e+09	1.00054e+09	9.1478e+08
cbdbA554	High	Master Protein	Q3ZWY0	Serine--tRNA ligase OS=Dehalococcoides mccartyi (strain CBDB1) GN=serS PE=3 SV=1	FALSE	0	291.751	57	34	412	34	1	413	47.4	5.83	High	High	High	High	High	High	4.66404e+07	9.32738e+07	7.71004e+07	4.55034e+08	4.78041e+08	3.83929e+08
cbdbA404	High	Master Protein	Q3ZZK1	Acyl CoA biotin-dependant carboxyltransferase OS=Dehalococcoides mccartyi (strain CBDB1) GN=cbdbA404 PE=4 SV=1	FALSE	0	288.786	66	29	384	29	1	516	56.1	7.61	High	High	High	High	High	High	1.32949e+07	2.78197e+07	4.45076e+07	2.05041e+08	1.51889e+08	1.9265e+08
cbdbA806	High	Master Protein	Q3ZXI5	3-isopropylmalate dehydratase large subunit OS=Dehalococcoides mccartyi (strain CBDB1) GN=leuC PE=3 SV=1	FALSE	0	288.654	58	31	885	31	1	416	44.5	7.2	High	High	High	High	High	High	1.73375e+08	2.14473e+08	2.00592e+08	1.07836e+09	9.96489e+08	9.17322e+08
cbdbA76	High	Master Protein	Q3ZWG4	Cysteine--tRNA ligase OS=Dehalococcoides mccartyi (strain CBDB1) GN=cysS PE=3 SV=1	FALSE	0	284.209	80	31	356	31	1	457	51.3	6.76	High	High	High	High	High	High	4.36048e+07	5.19247e+07	2.67843e+07	358494778	4.13286e+08	2.88504e+08
cbdbA1105	High	Master Protein	Q3ZY82	Riboflavin biosynthesis protein RibD OS=Dehalococcoides mccartyi (strain CBDB1) GN=ribD PE=3 SV=1	FALSE	0	283.32	80	28	427	28	1	365	38.8	7.28	High	High	High	High	High	High	4.65407e+07	5.58618e+07	3.73901e+07	4.77147e+08	4.09941e+08	3.69918e+08
cbdbA897	High	Master Protein	Q3ZXQ1	Putative branched-chain amino acid ABC transporter,periplasmic amino acid-binding protein OS=Dehalococcoides mccartyi (strain CBDB1) GN=cbdbA897 PE=4 SV=1	FALSE	0	282.904	67	19	717	19	1	430	46.7	5	High	High	High	High	High	High	7.89324e+07	7.83073e+07	6.59318e+07	8.33263e+08	8.43349e+08	6.50803e+08
cbdbA826	High	Master Protein	Q3ZXL7	Histidinol dehydrogenase OS=Dehalococcoides mccartyi (strain CBDB1) GN=hisD PE=3 SV=1	FALSE	0	279.794	70	35	456	35	1	436	46.9	6.57	High	High	High	High	High	High	3.44944e+07	4.59451e+07	5.47584e+07	4.0929e+08	3.97555e+08	2.93738e+08
cbdbA1199	High	Master Protein	Q3ZYE8	Enoyl-[acyl-carrier-protein] reductase [NADH] OS=Dehalococcoides mccartyi (strain CBDB1) GN=fabI PE=3 SV=1	FALSE	0	279.239	75	25	497	25	1	279	30.2	6.79	High	High	High	High	High	High	6.91384e+07	6.31231e+07	6.71967e+07	7.37312e+08	7.76359e+08	4.85894e+08
cbdbA958	High	Master Protein	Q3ZXX6	Transcription termination/antitermination protein NusG OS=Dehalococcoides mccartyi (strain CBDB1) GN=nusG PE=3 SV=1	FALSE	0	277.956	82	22	597	22	1	177	20.2	6.61	High	High	High	High	High	High	9.60932e+07	1.07367e+08	8.32417e+07	5.39818e+08	6.3141e+08	5.10583e+08
cbdbA1181	High	Master Protein	Q3ZYG2	Acetylornithine aminotransferase OS=Dehalococcoides mccartyi (strain CBDB1) GN=argD PE=3 SV=1	FALSE	0	276.721	89	27	296	27	1	398	43	7.02	High	High	High	High	High	High	2.88007e+07	3.9966e+07	3.59063e+07	2.89837e+08	1.96559e+08	1.95744e+08
cbdbA569	High	Master Protein	Q3ZWY9	Glyceraldehyde-3-phosphate dehydrogenase, typeI OS=Dehalococcoides mccartyi (strain CBDB1) GN=gap PE=3 SV=1	FALSE	0	272.457	82	26	703	26	1	335	36.4	6.87	High	High	High	High	High	High	1.6337e+08	2.46065e+08	2.66023e+08	1464261977	1.51675e+09	1.36311e+09
cbdbA1314	High	Master Protein	Q3ZYP6	Putative mannosyl-3-phosphoglycerate synthase OS=Dehalococcoides mccartyi (strain CBDB1) GN=cbdbA1314 PE=4 SV=1	FALSE	0	270.664	61	35	236	35	1	694	77.8	6.06	High	High	High	High	High	High	1.41605e+07	1.51735e+07	2.12669e+07	1.20511e+08	1.46627e+08	9.7177e+07
cbdbA405	High	Master Protein	Q3ZZK0	3-isopropylmalate dehydratase large subunit OS=Dehalococcoides mccartyi (strain CBDB1) GN=leuC PE=3 SV=1	FALSE	0	270.026	68	24	638	24	1	417	44.2	6.62	High	High	High	High	High	High	6.2836e+07	1.07994e+08	1.04399e+08	8.6808e+08	7.85475e+08	7.8064e+08
cbdbA738	High	Master Protein	Q3ZXF0	K(+)-insensitive pyrophosphate-energized proton pump OS=Dehalococcoides mccartyi (strain CBDB1) GN=hppA PE=3 SV=1	FALSE	0	269.837	29	24	559	24	1	708	73.3	6.07	High	High	High	High	High	High	8.82969e+07	1.37871e+08	1.03808e+08	6.71554e+08	3.42528e+08	3.45922e+08
cbdbA534	High	Master Protein	Q3ZZU1	ATP synthase subunit b OS=Dehalococcoides mccartyi (strain CBDB1) GN=atpF PE=3 SV=1	FALSE	0	269.517	67	31	576	31	1	169	19.1	5.54	High	High	High	High	High	High	1.12485e+08	1.31607e+08	1.00153e+08	9.54349e+08	8.57778e+08	5.35246e+08
cbdbA828	High	Master Protein	Q3ZXL6	Probable ATP phosphoribosyltransferase OS=Dehalococcoides mccartyi (strain CBDB1) GN=cbdbA828 PE=4 SV=1	FALSE	0	269	69	22	274	22	1	468	51.8	7.25	High	High	High	High	High	High	2.2239e+07	2.9179e+07	3.15746e+07	3.55709e+08	3.55374e+08	3.12799e+08
cbdbA1284	High	Master Protein	Q3ZYM5	Glutamyl-tRNA(Gln) amidotransferase subunit A OS=Dehalococcoides mccartyi (strain CBDB1) GN=gatA PE=3 SV=1	FALSE	0	268.643	68	23	322	23	1	486	52.8	6.57	High	High	High	High	High	High	1.27731e+07	1.04455e+07	2.35721e+07	1.85245e+08	1.57927e+08	1.22515e+08
cbdbA1359	High	Master Protein	Q3ZYV0	Protein GrpE OS=Dehalococcoides mccartyi (strain CBDB1) GN=grpE PE=3 SV=1	FALSE	0	268.631	93	24	754	24	1	187	21	5.21	High	High	High	High	High	High	2.65589e+08	2.63519e+08	2.35399e+08	1.08407e+09	1.3052e+09	8.99968e+08
cbdbA715	High	Master Protein	Q3ZXC7	Diaminopimelate epimerase OS=Dehalococcoides mccartyi (strain CBDB1) GN=dapF PE=3 SV=1	FALSE	0	267.897	86	18	440	18	1	284	31.5	6.39	High	High	High	High	High	High	4.31242e+07	7.81099e+07	3.85684e+07	6.96006e+08	6.92323e+08	5.60167e+08
cbdbA442	High	Master Protein	Q3ZZM1	50S ribosomal protein L2 OS=Dehalococcoides mccartyi (strain CBDB1) GN=rplB PE=3 SV=1	FALSE	0	267.708	77	30	911	30	1	274	29.9	10.4	High	High	High	High	High	High	3.91059e+08	4.49454e+08	4.68418e+08	1.98483e+09	2.02915e+09	1464540787
cbdbA389	High	Master Protein	Q3ZZG4	Ribose-phosphate pyrophosphokinase OS=Dehalococcoides mccartyi (strain CBDB1) GN=prs PE=3 SV=1	FALSE	0	264.132	81	30	516	30	1	324	35.7	6.8	High	High	High	High	High	High	9.18009e+07	1.11467e+08	9.74194e+07	6.66424e+08	6.45209e+08	4.93037e+08
cbdbA813	High	Master Protein	Q3ZXI0	Acetolactate synthase OS=Dehalococcoides mccartyi (strain CBDB1) GN=ilvB PE=3 SV=1	FALSE	0	263.832	58	29	504	29	1	569	61.8	6.01	High	High	High	High	High	High	6.57801e+07	8.57499e+07	8.84977e+07	7.48706e+08	8.06349e+08	6.09714e+08
cbdbA1183	High	Master Protein	Q3ZYG0	Argininosuccinate synthase OS=Dehalococcoides mccartyi (strain CBDB1) GN=argG PE=3 SV=1	FALSE	0	261.344	60	25	515	25	1	406	45.1	6.1	High	High	High	High	High	High	1.23855e+08	1.68169e+08	1.25413e+08	1.73851e+09	1.59495e+09	1.34995e+09
cbdbA1489	High	Master Protein	Q3ZZ67	Uncharacterized protein OS=Dehalococcoides mccartyi (strain CBDB1) GN=cbdbA1489 PE=4 SV=1	FALSE	0	259.739	83	24	574	24	1	255	29.6	6.18	High	High	High	High	High	High	1.49581e+08	2.14936e+08	1.54624e+08	8.41418e+08	9.55242e+08	761315677
cbdbA873	High	Master Protein	Q3ZXS2	Twitching mobility protein OS=Dehalococcoides mccartyi (strain CBDB1) GN=pilT PE=4 SV=1	FALSE	0	259.735	76	25	577	23	1	360	40.5	6.96	High	High	High	High	High	High	8.22985e+07	1.22459e+08	1.03488e+08	6.977e+08	6.04057e+08	5.18714e+08
cbdbA1122	High	Master Protein	Q3ZYB4	Threonine synthase OS=Dehalococcoides mccartyi (strain CBDB1) GN=thrC PE=3 SV=1	FALSE	0	257.334	81	28	419	28	1	348	36.6	8.09	High	High	High	High	High	High	3.05473e+07	5.10864e+07	4.27955e+07	5.47636e+08	5.85658e+08	4.74472e+08
cbdbA430	High	Master Protein	Q3ZZN2	3-dehydroquinate dehydratase OS=Dehalococcoides mccartyi (strain CBDB1) GN=aroD PE=3 SV=1	FALSE	0	257.188	77	19	421	19	1	222	24.5	8.06	High	High	High	High	High	High	4.12659e+07	4.8815e+07	6.71934e+07	5.10953e+08	7.39298e+08	5.3097e+08
cbdbA1059	High	Master Protein	Q3ZY27	Pyridine nucleotide-disulfide oxidoreductase family protein OS=Dehalococcoides mccartyi (strain CBDB1) GN=cbdbA1059 PE=4 SV=1	FALSE	0	257.155	65	26	352	26	1	435	46.4	6.2	High	High	High	High	High	High	7.16422e+07	9.25012e+07	5.88933e+07	5.17985e+08	6.43422e+08	4.53735e+08
cbdbA565	High	Master Protein	Q3ZWW9	Uncharacterized protein OS=Dehalococcoides mccartyi (strain CBDB1) GN=cbdbA565 PE=4 SV=1	FALSE	0	256.128	88	18	483	18	1	140	15.2	5.1	High	High	High	High	High	High	1.85653e+08	2.36082e+08	3.14051e+08	2.36445e+09	2.00038e+09	1.6922e+09
cbdbA383	High	Master Protein	Q3ZZH0	Phosphopantothenoylcysteine synthetase/decarboxylase OS=Dehalococcoides mccartyi (strain CBDB1) GN=coaBC PE=4 SV=1	FALSE	0	255.329	73	26	302	26	1	393	42	6.43	High	High	High	High	High	High	3.48074e+07	4.71646e+07	4.80263e+07	2.2903e+08	2.71524e+08	1.89308e+08
cbdbA596	High	Master Protein	Q3ZWZ2	Hydrogenase, group 3, VhuG subunit OS=Dehalococcoides mccartyi (strain CBDB1) GN=cbdbA596 PE=4 SV=1	FALSE	0	255.2	66	27	729	27	1	312	34.1	6.18	High	High	High	High	High	High	4.53506e+08	5.00648e+08	4.67097e+08	1.78834e+09	1.87599e+09	1.70291e+09
cbdbA581	High	Master Protein	Q3ZX04	Soluble hydrogenase, tritium exchange subunit OS=Dehalococcoides mccartyi (strain CBDB1) GN=cbdbA581 PE=3 SV=1	FALSE	0	254.768	70	27	539	27	1	362	39.2	8.79	High	High	High	High	High	High	1.23579e+08	2.04833e+08	1.25842e+08	1.52748e+09	1.57666e+09	7.75175e+08
cbdbA424	High	Master Protein	Q3ZZI7	Chorismate mutase/prephenate dehydratase (P-protein) OS=Dehalococcoides mccartyi (strain CBDB1) GN=pheA PE=4 SV=1	FALSE	0	253.356	89	31	611	30	1	358	40.2	6.28	High	High	High	High	High	High	1.74325e+08	1.96663e+08	2.14748e+08	1.13586e+09	1.09639e+09	8.76318e+08
cbdbA537	High	Master Protein	Q3ZZT8	ATP synthase gamma chain OS=Dehalococcoides mccartyi (strain CBDB1) GN=atpG PE=3 SV=1	FALSE	0	252.644	58	21	466	21	1	285	31.7	9.25	High	High	High	High	High	High	8.20583e+07	8.71616e+07	9.25231e+07	8.63428e+08	9.13044e+08	5.3329e+08
cbdbA410	High	Master Protein	Q3ZZJ6	Uncharacterized protein OS=Dehalococcoides mccartyi (strain CBDB1) GN=cbdbA410 PE=4 SV=1	FALSE	0	252.009	97	23	704	23	1	123	14.1	5.02	High	High	High	High	High	High	2.14722e+08	1.96909e+08	1.8227e+08	8.74399e+08	1.06318e+09	9.83068e+08
cbdbA606	High	Master Protein	Q3ZX30	Radical SAM domain protein OS=Dehalococcoides mccartyi (strain CBDB1) GN=rdhI PE=4 SV=1	FALSE	0	250.24	84	20	296	20	1	249	28.7	5.54	High	High	High	High	High	High	6.36607e+07	6.16154e+07	7.89096e+07	4.20235e+08	4.97952e+08	4.42884e+08
cbdbA266	High	Master Protein	Q3ZWU9	Uncharacterized protein OS=Dehalococcoides mccartyi (strain CBDB1) GN=cbdbA266 PE=4 SV=1	FALSE	0	249.595	69	33	341	33	1	530	59.2	5.66	High	High	High	High	High	High	3.59515e+07	4.25412e+07	4.3866e+07	3.3449e+08	3.39089e+08	2.58568e+08
cbdbA1310	High	Master Protein	Q3ZYP9	Twitching mobility protein OS=Dehalococcoides mccartyi (strain CBDB1) GN=pilT PE=4 SV=1	FALSE	0	249.213	79	25	454	25	1	371	41.3	6.16	High	High	High	High	High	High	3.6413e+07	4.69914e+07	4.98722e+07	4.30049e+08	3.53792e+08	2.72796e+08
cbdbA894	High	Master Protein	Q3ZXQ4	Acyl-CoA synthetase (AMP-forming) / AMP-acid ligase OS=Dehalococcoides mccartyi (strain CBDB1) GN=cbdbA894 PE=4 SV=1	FALSE	0	245.978	67	26	397	26	1	429	48.4	6.48	High	High	High	High	High	High	2.94338e+07	4.1592e+07	3.65611e+07	3.67852e+08	3.84824e+08	2.85831e+08
cbdbA1371	High	Master Protein	Q3ZYU1	CTP synthase OS=Dehalococcoides mccartyi (strain CBDB1) GN=pyrG PE=3 SV=1	FALSE	0	245.639	72	34	413	34	1	544	60.3	6.2	High	High	High	High	High	High	4.88413e+07	6.35299e+07	5.32211e+07	3.9485e+08	3.66185e+08	3.11607e+08
cbdbA749	High	Master Protein	Q3ZXE1	Phosphomethylpyrimidine synthase OS=Dehalococcoides mccartyi (strain CBDB1) GN=thiC PE=3 SV=1	FALSE	0	244.532	65	27	319	27	1	431	46.3	6.34	High	High	High	High	High	High	3.25248e+07	3.90417e+07	3.91172e+07	1.89541e+08	1.68314e+08	1.38115e+08
cbdbA651	High	Master Protein	Q3ZX46	Carbon monoxide dehydrogenase/acetyl-CoA synthase large subunit OS=Dehalococcoides mccartyi (strain CBDB1) GN=acsC PE=4 SV=1	FALSE	0	244.091	64	31	338	31	1	448	48.9	7.94	High	High	High	High	High	High	2.44077e+07	2.45402e+07	3.35955e+07	2.56849e+08	2.47482e+08	1.93807e+08
cbdbA901	High	Master Protein	Q3ZXS3	Acyl-CoA synthetase (AMP-forming) / AMP-acid ligase OS=Dehalococcoides mccartyi (strain CBDB1) GN=cbdbA901 PE=4 SV=1	FALSE	0	243.586	58	36	331	36	1	630	71	6.98	High	High	High	High	High	High	2.82298e+07	2.72057e+07	4.1332e+07	1.44139e+08	1.5272e+08	1.29226e+08
cbdbA688	High	Master Protein	Q3ZXA5	Conserved domain protein OS=Dehalococcoides mccartyi (strain CBDB1) GN=cbdbA688 PE=4 SV=1	FALSE	0	243.018	91	24	594	24	1	128	14.6	7.03	High	High	High	High	High	High	7.38194e+08	6.89438e+08	4.66594e+08	2.02419e+09	1.68338e+09	1.40758e+09
cbdbA453	High	Master Protein	Q3ZZN4	50S ribosomal protein L6 OS=Dehalococcoides mccartyi (strain CBDB1) GN=rplF PE=3 SV=1	FALSE	0	243	76	20	492	20	1	182	19.5	9.92	High	High	High	High	High	High	1.28746e+08	1.62105e+08	1.62632e+08	8.92013e+08	1.32607e+09	7.41053e+08
cbdbA890	High	Master Protein	Q3ZXQ8	Cobyric acid synthase OS=Dehalococcoides mccartyi (strain CBDB1) GN=cobQ PE=3 SV=1	FALSE	0	240.79	79	26	358	26	1	503	55	5.64	High	High	High	High	High	High	2.26012e+07	3.39187e+07	2.51562e+07	1.92073e+08	1.85238e+08	1.46332e+08
cbdbA1066	High	Master Protein	Q3ZY69	Radical SAM domain protein OS=Dehalococcoides mccartyi (strain CBDB1) GN=rdhI PE=4 SV=1	FALSE	0	238.474	72	25	292	25	1	273	31.3	7.11	High	High	High	High	High	High	2.0381e+07	2.5385e+07	1.36148e+07	2.82483e+08	2.20544e+08	2.17216e+08
cbdbA902	High	Master Protein	Q3ZXT8	Indolepyruvate oxidoreductase subunit IorA OS=Dehalococcoides mccartyi (strain CBDB1) GN=iorA PE=4 SV=1	FALSE	0	232.457	60	29	364	29	1	598	64	7.2	High	High	High	High	High	High	3.64964e+07	5.08732e+07	4.36763e+07	2.88391e+08	2.60866e+08	2.28688e+08
cbdbA1133	High	Master Protein	Q3ZYA4	Tyrosine recombinase XerC OS=Dehalococcoides mccartyi (strain CBDB1) GN=xerD PE=3 SV=1	FALSE	0	231.369	79	26	272	26	1	302	34.3	9.39	High	High	High	High	High	High	2.53827e+07	4.14445e+07	4.82232e+07	3.07456e+08	4.0738e+08	2.19073e+08
cbdbA170	High	Master Protein	Q3ZWN0	Putative [Fe] hydrogenase, HymB subunit OS=Dehalococcoides mccartyi (strain CBDB1) GN=hymB PE=4 SV=1	FALSE	0	231.005	52	23	420	23	1	417	45.2	6.46	High	High	High	High	High	High	8.1833e+07	1.09893e+08	1.18518e+08	6.44139e+08	6.51986e+08	5.55441e+08
cbdbA1353	High	Master Protein	Q3ZYV6	Ornithine carbamoyltransferase OS=Dehalococcoides mccartyi (strain CBDB1) GN=argF PE=3 SV=1	FALSE	0	229.257	90	26	437	26	1	311	34	5.36	High	High	High	High	High	High	5.38371e+07	7.12347e+07	6.5082e+07	3.37738e+08	2.69233e+08	2.9226e+08
cbdbA583	High	Master Protein	Q3ZX03	Tyrosine--tRNA ligase OS=Dehalococcoides mccartyi (strain CBDB1) GN=tyrS PE=3 SV=1	FALSE	0	228.51	61	25	272	25	1	396	44.4	5.88	High	High	High	High	High	High	7.53234e+06	7.2673e+06	8.26366e+06	1.5937e+08	1.5221e+08	1.51304e+08
cbdbA629	High	Master Protein	Q3ZX39	Transketolase OS=Dehalococcoides mccartyi (strain CBDB1) GN=tkt PE=3 SV=1	FALSE	0	227.531	56	30	546	30	1	666	72.3	5.92	High	High	High	High	High	High	5.51032e+07	7.47632e+07	9.52697e+07	3.97929e+08	3.83123e+08	3.46283e+08
cbdbA934	High	Master Protein	Q3ZXV4	Aspartate-semialdehyde dehydrogenase OS=Dehalococcoides mccartyi (strain CBDB1) GN=asd PE=3 SV=1	FALSE	0	226.685	76	20	363	20	1	338	37.1	6.14	High	High	High	High	High	High	4.77772e+07	5.96455e+07	3.84373e+07	3.52371e+08	3.53024e+08	3.19931e+08
cbdbA318	High	Master Protein	Q3ZZC4	Ribosome-recycling factor OS=Dehalococcoides mccartyi (strain CBDB1) GN=frr PE=3 SV=1	FALSE	0	226.137	90	27	646	27	1	185	21	8.09	High	High	High	High	High	High	2.43162e+08	2.65183e+08	2.14302e+08	1.0328e+09	1.09643e+09	1.00575e+09
cbdbA641	High	Master Protein	Q3ZX54	Nicotinate-nucleotide--dimethylbenzimidazole phosphoribosyltransferase OS=Dehalococcoides mccartyi (strain CBDB1) GN=cobT PE=3 SV=1	FALSE	0	224.81	80	21	141	21	1	352	36.7	6.8	Not Found	Not Found	High	High	High	High			4.91589e+06	7.04344e+07	6.27612e+07	5.53683e+07
cbdbA372	High	Master Protein	Q3ZZH8	DegV family protein OS=Dehalococcoides mccartyi (strain CBDB1) GN=degV PE=4 SV=1	FALSE	0	224.434	88	23	526	23	1	279	29.7	8.51	High	High	High	High	High	High	6.23409e+07	6.31778e+07	1.52539e+08	8.08697e+08	2.12429e+09	6.61584e+08
cbdbA283	High	Master Protein	Q3ZZA3	Cell division protein ftsA OS=Dehalococcoides mccartyi (strain CBDB1) GN=ftsA PE=3 SV=1	FALSE	0	223.435	69	23	326	23	1	408	43.8	6.8	High	High	High	High	High	High	5.16658e+07	6.02575e+07	9.58015e+07	3.72934e+08	4.35212e+08	2.36318e+08
cbdbA1292	High	Master Protein	Q3ZYL8	Aspartate aminotransferase OS=Dehalococcoides mccartyi (strain CBDB1) GN=aspC PE=3 SV=1	FALSE	0	223.042	66	25	361	25	1	398	44.2	7.05	High	High	High	High	High	High	3.92086e+07	5.39143e+07	4.73862e+07	4.71064e+08	4.62786e+08	4.15929e+08
cbdbA465	High	Master Protein	Q3ZZP7	30S ribosomal protein S4 OS=Dehalococcoides mccartyi (strain CBDB1) GN=rpsD PE=3 SV=1	FALSE	0	222.966	79	24	523	24	1	207	23.5	10.21	High	High	High	High	High	High	4.13592e+08	4.42566e+08	4.83332e+08	2.35719e+09	2.54472e+09	1.83068e+09
cbdbA914	High	Master Protein	Q3ZXS8	Uncharacterized protein OS=Dehalococcoides mccartyi (strain CBDB1) GN=cbdbA914 PE=4 SV=1	FALSE	0	222.958	63	15	568	15	1	256	27.9	4.64	High	High	High	High	High	High	1.62484e+08	1.82084e+08	1.0625e+08	1.84821e+09	1.29505e+09	1.6321e+09
cbdbA364	High	Master Protein	Q3ZZD8	Uncharacterized protein OS=Dehalococcoides mccartyi (strain CBDB1) GN=cbdbA364 PE=4 SV=1	FALSE	0	221.378	82	23	289	23	1	183	20.9	5.87	High	High	High	High	High	High	3.49813e+07	4.33968e+07	4.86124e+07	3.44118e+08	4.13711e+08	2.40701e+08
cbdbA1463	High	Master Protein	Q3ZZ43	Peptide ABC transporter, periplasmic peptide-binding protein OS=Dehalococcoides mccartyi (strain CBDB1) GN=cbdbA1463 PE=4 SV=1	FALSE	0	220.141	53	21	383	21	1	543	59.7	4.78	High	High	High	High	High	High	188013232	2.15649e+08	1.37376e+08	1.64446e+09	1.90227e+09	1.51134e+09
cbdbA327	High	Master Protein	Q3ZZB8	Pyridoxal biosynthesis lyase PdxS OS=Dehalococcoides mccartyi (strain CBDB1) GN=pdxS PE=3 SV=1	FALSE	0	218.846	60	22	1144	22	1	293	31.2	6.32	High	High	High	High	High	High	1.42457e+08	2.19929e+08	1.98233e+08	1.40906e+09	1.35868e+09	1.22824e+09
cbdbA508	High	Master Protein	Q3ZZR5	Diaminopimelate decarboxylase OS=Dehalococcoides mccartyi (strain CBDB1) GN=lysA PE=3 SV=1	FALSE	0	216.663	67	26	432	26	1	434	47.4	5.83	High	High	High	High	High	High	7.64261e+07	8.73916e+07	9.33991e+07	6.19734e+08	6.66112e+08	5.32896e+08
cbdbA481	High	Master Protein	Q3ZZT3	Uncharacterized protein OS=Dehalococcoides mccartyi (strain CBDB1) GN=cbdbA481 PE=4 SV=1	FALSE	0	216.53	67	22	211	22	1	343	37.9	5.55	High	High	High	High	High	High	1.07547e+07	1.01449e+07	5.56995e+06	2.21929e+08	4.05028e+08	1.23683e+08
cbdbA654	High	Master Protein	Q3ZX44	Carbon monoxide dehydrogenase/acetyl-CoA synthase small subunit OS=Dehalococcoides mccartyi (strain CBDB1) GN=acsD PE=4 SV=1	FALSE	0	214.993	70	25	429	25	1	313	34.3	4.96	High	High	High	High	High	High	9.70367e+07	1.15147e+08	8.79279e+07	5.38043e+08	4.6244e+08	4.40373e+08
cbdbA7	High	Master Protein	Q3ZWB6	Histidine--tRNA ligase OS=Dehalococcoides mccartyi (strain CBDB1) GN=hisS PE=3 SV=1	FALSE	0	214.184	56	24	376	24	1	418	46.7	6.46	High	High	High	High	High	High	4.68004e+07	6.21022e+07	6.58973e+07	3.35239e+08	3.22794e+08	294917884
cbdbA1683	High	Master Protein	Q3ZW58	SAM-dependent methyltransferase UbiE/COQ5 family OS=Dehalococcoides mccartyi (strain CBDB1) GN=cbdbA1683 PE=4 SV=1	FALSE	0	213.094	79	16	242	16	1	221	24.7	9.35	High	High	High	High	High	High	3.18534e+07	4.68383e+06	2.73321e+07	2.02579e+08	3.12367e+08	1.72566e+08
cbdbA850	High	Master Protein	Q3ZXP4	Hydrogenase, group 4, EchE subunit OS=Dehalococcoides mccartyi (strain CBDB1) GN=cbdbA850 PE=4 SV=1	FALSE	0	210.969	65	29	385	29	1	359	39.8	6.19	High	High	High	High	High	High	1.09297e+08	1.22869e+08	1.24285e+08	6.68893e+08	6.90522e+08	5.48497e+08
cbdbA46	High	Master Protein	Q3ZWD5	Glutamate synthase (NADPH), homotetrameric OS=Dehalococcoides mccartyi (strain CBDB1) GN=gltA PE=4 SV=1	FALSE	0	210.589	62	31	321	31	1	465	50.2	7.36	High	High	High	High	High	High	2.06524e+07	3.52109e+07	2.71606e+07	1.56893e+08	1.57227e+08	1.33914e+08
cbdbA896	High	Master Protein	Q3ZXQ2	Putative branched-chain amino acid ABC transporter,periplasmic amino acid-binding protein OS=Dehalococcoides mccartyi (strain CBDB1) GN=cbdbA896 PE=4 SV=1	FALSE	0	210.565	66	19	398	19	1	428	46.8	5.02	High	High	High	High	High	High	5.28664e+07	5.55184e+07	3.49419e+07	4.95179e+08	4.22584e+08	3.82493e+08
cbdbA1715	High	Master Protein	Q3ZW71	ABC transporter, ATP-binding protein OS=Dehalococcoides mccartyi (strain CBDB1) GN=cbdbA1715 PE=4 SV=1	FALSE	0	210	68	25	326	25	1	313	34.5	6.07	High	High	High	High	High	High	4.33498e+07	6.21493e+07	4.67209e+07	3.52537e+08	3.34602e+08	2.79348e+08
cbdbA1185	High	Master Protein	Q3ZYF9	Argininosuccinate lyase OS=Dehalococcoides mccartyi (strain CBDB1) GN=argH PE=3 SV=1	FALSE	0	209.485	52	26	334	26	1	461	51.2	6.23	High	High	High	High	High	High	3.78697e+07	5.30554e+07	6.79092e+07	3.71471e+08	3.89395e+08	3.12861e+08
cbdbA425	High	Master Protein	Q3ZZI6	Chorismate synthase OS=Dehalococcoides mccartyi (strain CBDB1) GN=aroC PE=3 SV=1	FALSE	0	209.198	59	20	564	20	1	364	38.7	7.42	High	High	High	High	High	High	1.80056e+08	2.5745e+08	3.89236e+08	1.55837e+09	1.6913e+09	1.463e+09
cbdbA104	High	Master Protein	Q3ZWI3	Putative type I restriction-modification system methylation subunit OS=Dehalococcoides mccartyi (strain CBDB1) GN=cbdbA104 PE=4 SV=1	FALSE	0	208.627	60	29	206	29	1	645	73.8	5.69	High	High	High	High	High	High	1.15906e+07	1.08153e+07	1.14515e+07	7.8332e+07	8.15765e+07	6.35711e+07
cbdbA831	High	Master Protein	Q3ZXL3	SPFH domain protein OS=Dehalococcoides mccartyi (strain CBDB1) GN=cbdbA831 PE=4 SV=1	FALSE	0	207.989	62	20	528	20	1	267	29.8	6.39	High	High	High	High	High	High	2.83802e+08	3.2688e+08	2.66951e+08	1.00378e+09	8.67538e+08	9.76074e+08
cbdbA864	High	Master Protein	Q3ZXN1	Uncharacterized protein OS=Dehalococcoides mccartyi (strain CBDB1) GN=cbdbA864 PE=4 SV=1	FALSE	0	207.688	85	20	278	20	1	231	26.6	4.91	High	High	High	High	High	High	7.31801e+06	8.51697e+06	5.60632e+06	4.04873e+08	3.28338e+08	3.07677e+08
cbdbA825	High	Master Protein	Q3ZXL8	Histidinol-phosphate aminotransferase OS=Dehalococcoides mccartyi (strain CBDB1) GN=hisC PE=3 SV=1	FALSE	0	207.027	73	22	300	22	1	358	40.2	7.15	High	High	High	High	High	High	2.88172e+07	3.90846e+07	3.7785e+07	2.18178e+08	4.96912e+08	2.3773e+08
cbdbA459	High	Master Protein	Q3ZZQ3	Adenylate kinase OS=Dehalococcoides mccartyi (strain CBDB1) GN=adk PE=3 SV=1	FALSE	0	205.618	78	19	284	19	1	216	23.6	7.91	High	High	High	High	High	High	3.32846e+07	4.02262e+07	3.57516e+07	2.13617e+08	2.22322e+08	1.92194e+08
cbdbA1289	High	Master Protein	Q3ZYM1	ABC transporter, ATP-binding protein OS=Dehalococcoides mccartyi (strain CBDB1) GN=cbdbA1289 PE=3 SV=1	FALSE	0	205.147	64	20	291	20	1	306	34.2	8.05	High	High	High	High	High	High	2.39468e+07	2.39928e+07	3.28823e+07	3.99657e+08	3.74254e+08	2.7843e+08
cbdbA1058	High	Master Protein	Q3ZY28	Glutamine amidotransferase, class II OS=Dehalococcoides mccartyi (strain CBDB1) GN=cbdbA1058 PE=4 SV=1	FALSE	0	204.817	48	27	312	27	1	376	42.3	6.47	High	High	High	High	High	High	5.17843e+07	6.1204e+07	6.0041e+07	5.44296e+08	5.2798e+08	4.26735e+08
cbdbA841	High	Master Protein	Q3ZXK4	Elongation factor 4 OS=Dehalococcoides mccartyi (strain CBDB1) GN=lepA PE=3 SV=1	FALSE	0	204.318	52	24	210	24	1	605	67	6.55	High	High	High	High	High	High	1.00234e+07	1.32205e+07	2.87293e+07	1.37389e+08	1.23817e+08	1.10356e+08
cbdbA1301	High	Master Protein	Q3ZYQ8	DNA-binding response regulator, LuxR family OS=Dehalococcoides mccartyi (strain CBDB1) GN=cbdbA1301 PE=4 SV=1	FALSE	0	203.978	86	22	420	22	1	225	24.8	6.35	High	High	High	High	High	High	6.28279e+07	8.72522e+07	7.17555e+07	5.99655e+08	5.74139e+08	4.15429e+08
cbdbA524	High	Master Protein	Q3ZZV0	Putative exonuclease SbcC OS=Dehalococcoides mccartyi (strain CBDB1) GN=cbdbA524 PE=4 SV=1	FALSE	0	203.844	47	34	185	34	1	859	97.7	5.71	High	High	High	High	High	High	9.34239e+06	1.16714e+07	1.60503e+07	6.8801e+07	5.81911e+07	5.19124e+07
cbdbA278	High	Master Protein	Q3ZZA7	50S ribosomal protein L19 OS=Dehalococcoides mccartyi (strain CBDB1) GN=rplS PE=3 SV=1	FALSE	0	203.798	72	15	583	15	1	131	14.8	9.88	High	High	High	High	High	High	4.66597e+08	4.53431e+08	4.34571e+08	1.74961e+09	1.84821e+09	1.36105e+09
cbdbA141	High	Master Protein	Q3ZWK6	Acetyl-CoA carboxylase, biotin carboxylase OS=Dehalococcoides mccartyi (strain CBDB1) GN=accC PE=4 SV=1	FALSE	0	203.78	64	25	271	25	1	498	54.7	6.25	High	High	High	High	High	High	3.25873e+07	4.33525e+07	3.95506e+07	2.75009e+08	3.23309e+08	2.52928e+08
cbdbA1399	High	Master Protein	Q3ZYW4	[NiFe] hydrogenase maturation protein HypF OS=Dehalococcoides mccartyi (strain CBDB1) GN=hypF PE=4 SV=1	FALSE	0	203.693	51	30	147	30	1	763	84.4	6.95	High	High	High	High	High	High	4.04029e+06	5.02802e+06	4.46932e+06	3.8995e+07	5.05149e+07	3.24103e+07
cbdbA113	High	Master Protein	Q3ZWH6	Uncharacterized protein OS=Dehalococcoides mccartyi (strain CBDB1) GN=cbdbA113 PE=4 SV=1	FALSE	0	203.573	82	17	438	17	1	102	11.6	4.7	High	High	High	High	High	High	2.9682e+08	3.02862e+08	3.03139e+08	1.48296e+09	1.51371e+09	1.22656e+09
cbdbA1123	High	Master Protein	Q3ZYB3	Homoserine dehydrogenase OS=Dehalococcoides mccartyi (strain CBDB1) GN=metM PE=3 SV=1	FALSE	0	201.058	64	24	318	24	1	433	46.7	6.57	High	High	High	High	High	High	2.73247e+07	3.83205e+07	3.30199e+07	3.58897e+08	3.60387e+08	2.95898e+08
cbdbA935	High	Master Protein	Q3ZXV3	4-hydroxy-tetrahydrodipicolinate synthase OS=Dehalococcoides mccartyi (strain CBDB1) GN=dapA PE=3 SV=1	FALSE	0	201.034	56	20	427	20	1	297	32	6.43	High	High	High	High	High	High	3.59307e+07	5.62173e+07	3.69913e+07	5.65586e+08	6.04271e+08	5.07469e+08
cbdbA1441	High	Master Protein	Q3ZZ17	Anthranilate synthase component I OS=Dehalococcoides mccartyi (strain CBDB1) GN=trpE PE=4 SV=1	FALSE	0	200.215	75	27	251	27	1	485	53.8	6.15	High	High	High	High	High	High	1.78561e+07	2.59016e+07	2.69435e+07	2.22148e+08	1.67393e+08	1.17005e+08
cbdbA1331	High	Master Protein	Q3ZYS8	Uncharacterized protein OS=Dehalococcoides mccartyi (strain CBDB1) GN=cbdbA1331 PE=4 SV=1	FALSE	0	198.47	79	19	450	19	1	136	15.1	5.44	High	High	High	High	High	High	9.86608e+07	1.40546e+08	1.2621e+08	9.77229e+08	1.04609e+09	9.22047e+08
cbdbA530	High	Master Protein	Q3ZZU5	Uncharacterized protein OS=Dehalococcoides mccartyi (strain CBDB1) GN=cbdbA530 PE=4 SV=1	FALSE	0	197.139	89	17	503	17	1	189	21.2	4.94	High	High	High	High	High	High	8.16322e+07	9.65757e+07	7.48757e+07	7.92565e+08	6.81305e+08	6.35971e+08
cbdbA892	High	Master Protein	Q3ZXQ6	Branched-chain amino acid ABC transporter,ATP-binding protein OS=Dehalococcoides mccartyi (strain CBDB1) GN=cbdbA892 PE=4 SV=1	FALSE	0	196.572	71	16	198	16	1	276	30.7	5.55	High	High	High	High	High	High	6.83382e+06	1.91149e+07	1.75589e+07	1.77466e+08	1.71129e+08	1.13855e+08
cbdbA1309	High	Master Protein	Q3ZYQ0	Putative type IV pilus assembly family protein OS=Dehalococcoides mccartyi (strain CBDB1) GN=cbdbA1309 PE=4 SV=1	FALSE	0	195.68	53	22	476	22	1	494	54.8	5.12	High	High	High	High	High	High	1.18078e+08	1.53339e+08	1.20256e+08	6.56679e+08	5.91036e+08	5.4281e+08
cbdbA769	High	Master Protein	Q3ZXH1	Adenine deaminase OS=Dehalococcoides mccartyi (strain CBDB1) GN=ade PE=3 SV=1	FALSE	0	195.46	54	26	275	26	1	571	61.4	6.01	High	High	High	High	High	High	2.11518e+07	2.07688e+07	2.73418e+07	1.33669e+08	1.29926e+08	1.2686e+08
cbdbA656	High	Master Protein	Q3ZX43	Bifunctional protein FolD OS=Dehalococcoides mccartyi (strain CBDB1) GN=folD PE=3 SV=1	FALSE	0	195.237	87	17	263	17	1	296	31.3	7.18	High	High	High	High	High	High	1.91188e+07	2.73034e+07	4.10603e+07	5.26965e+08	6.00837e+08	4.09466e+08
cbdbA503	High	Master Protein	Q3ZZR8	Glutamine--fructose-6-phosphate aminotransferase [isomerizing] OS=Dehalococcoides mccartyi (strain CBDB1) GN=glmS PE=3 SV=1	FALSE	0	194.996	62	27	174	27	1	593	64.8	6.62	High	High	High	High	High	High	1.05982e+07	1.33539e+07	5.85388e+06	8.19488e+07	6.69238e+07	5.69694e+07
cbdbA1293	High	Master Protein	Q3ZYL7	Tryptophan--tRNA ligase OS=Dehalococcoides mccartyi (strain CBDB1) GN=trpS PE=3 SV=1	FALSE	0	194.486	59	21	334	21	1	323	36.4	7.12	High	High	High	High	High	High	2.59752e+07	4.68907e+07	6.73267e+07	5.11347e+08	5.49226e+08	3.60419e+08
cbdbA102	High	Master Protein	Q3ZWI6	Uncharacterized protein OS=Dehalococcoides mccartyi (strain CBDB1) GN=cbdbA102 PE=4 SV=1	FALSE	0	194.481	50	31	188	31	1	794	90.2	7.99	High	High	High	High	High	High	1.13063e+07	1.70534e+07	1.3013e+07	7.09907e+07	5.34057e+07	7.21356e+07
cbdbA427	High	Master Protein	Q3ZZI5	3-phosphoshikimate 1-carboxyvinyltransferase OS=Dehalococcoides mccartyi (strain CBDB1) GN=aroA PE=3 SV=1	FALSE	0	194.473	66	18	374	18	1	420	45	6.6	High	High	High	High	High	High	5.01267e+07	7.01593e+07	1.37385e+08	4.62433e+08	4.66038e+08	2.95193e+08
cbdbB16	High	Master Protein	Q3ZX71	Pyruvic-ferredoxin oxidoreductase, gammasubunit OS=Dehalococcoides mccartyi (strain CBDB1) GN=porG PE=4 SV=1	FALSE	0	193.651	76	21	368	21	1	190	20.5	9.5	High	High	High	High	High	High	1.08881e+08	1.39205e+08	2.00205e+08	1.05886e+09	1.11249e+09	5.29987e+08
cbdbA1114	High	Master Protein	Q3ZYB9	Dihydroorotase OS=Dehalococcoides mccartyi (strain CBDB1) GN=pyrC PE=3 SV=1	FALSE	0	193.627	68	22	201	22	1	428	45.1	5.71	High	High	High	High	High	High	1.8773e+07	1.60051e+07	1.04622e+07	2.27211e+08	1.75603e+08	1.80378e+08
cbdbA1016	High	Master Protein	Q3ZY17	Uncharacterized protein OS=Dehalococcoides mccartyi (strain CBDB1) GN=cbdbA1016 PE=4 SV=1	FALSE	0	193.475	61	19	465	19	1	371	39.5	5.36	High	High	High	High	High	High	5.81181e+07	3.61974e+07	4.42259e+07	4.63057e+08	3.74965e+08	3.51971e+08
cbdbA358	High	Master Protein	Q3ZZE4	Rubrerythrin OS=Dehalococcoides mccartyi (strain CBDB1) GN=cbdbA358 PE=4 SV=1	FALSE	0	193.45	97	19	536	19	1	159	17.2	6.79	High	High	High	High	High	High	1.07666e+08	1.56814e+08	9.4224e+07	7.73373e+08	9.12431e+08	7.90855e+08
cbdbA515	High	Master Protein	Q3ZZV8	50S ribosomal protein L9 OS=Dehalococcoides mccartyi (strain CBDB1) GN=rplI PE=3 SV=1	FALSE	0	191.082	89	23	421	23	1	151	16.5	9.5	High	High	High	High	High	High	1.20475e+08	1.44703e+08	1.47456e+08	5.61314e+08	5.06798e+08	3.79916e+08
cbdbA956	High	Master Protein	Q3ZXX8	50S ribosomal protein L1 OS=Dehalococcoides mccartyi (strain CBDB1) GN=rplA PE=3 SV=1	FALSE	0	191.064	60	18	526	18	1	237	25.3	9.42	High	High	High	High	High	High	1.34334e+08	1.5926e+08	2.42894e+08	1.79224e+09	2.11802e+09	1.19615e+09
cbdbA773	High	Master Protein	Q3ZXG8	ABC transporter, ATP-binding protein OS=Dehalococcoides mccartyi (strain CBDB1) GN=cbdbA773 PE=3 SV=1	FALSE	0	190.132	54	20	264	20	1	305	33.7	6.06	High	High	High	High	High	High	4.37564e+07	3.38614e+07	6.18768e+07	2.87534e+08	2.89134e+08	2.44978e+08
cbdbA1127	High	Master Protein	Q3ZYA9	Peptide chain release factor 1 OS=Dehalococcoides mccartyi (strain CBDB1) GN=prfA PE=3 SV=1	FALSE	0	189.218	48	19	256	19	1	355	40.6	5.25	High	High	High	High	High	High	3.81906e+07	3.39578e+07	3.59646e+07	3.18876e+08	1.42409e+08	2.57842e+08
cbdbA1245	High	Master Protein	Q3ZYL0	Uncharacterized protein OS=Dehalococcoides mccartyi (strain CBDB1) GN=cbdbA1245 PE=4 SV=1	FALSE	0	188.566	93	23	810	23	1	115	13.1	8.29	High	High	High	High	High	High	4.68648e+08	5.33824e+08	4.80797e+08	1.86497e+09	2.22024e+09	1.79186e+09
cbdbA1025	High	Master Protein	Q3ZY08	Putative cell division protein OS=Dehalococcoides mccartyi (strain CBDB1) GN=cbdbA1025 PE=4 SV=1	FALSE	0	188.323	81	27	271	27	1	379	41.6	8.1	High	High	High	High	High	High	2.66159e+07	3.83083e+07	4.06424e+07	2.31574e+08	2.05378e+08	1.51395e+08
cbdbA951	High	Master Protein	Q3ZXW3	Acetyltransferase, GNAT family OS=Dehalococcoides mccartyi (strain CBDB1) GN=cbdbA951 PE=4 SV=1	FALSE	0	187.394	73	19	338	19	1	291	32.4	5.49	High	High	High	High	High	High	4.9017e+07	3.54265e+07	3.60532e+07	342951627	4.11192e+08	2.6313e+08
cbdbA494	High	Master Protein	Q3ZZS3	PmbA OS=Dehalococcoides mccartyi (strain CBDB1) GN=cbdbA494 PE=4 SV=1	FALSE	0	187.389	51	16	193	16	1	433	46.8	5.41	High	High	High	High	High	High	2.19256e+07	2.98098e+07	2.18004e+07	2.22998e+08	2.17876e+08	1.55576e+08
cbdbA1684	High	Master Protein	Q3ZW57	AIR synthase domain protein OS=Dehalococcoides mccartyi (strain CBDB1) GN=cbdbA1684 PE=4 SV=1	FALSE	0	186.414	70	19	349	19	1	357	38.4	5.34	High	High	High	High	High	High	9.36886e+07	1.37027e+08	1.46673e+08	5.0002e+08	6.66663e+08	4.90695e+08
cbdbA1436	High	Master Protein	Q3ZYY2	DNA polymerase III, alpha subunit OS=Dehalococcoides mccartyi (strain CBDB1) GN=dnaE PE=4 SV=1	FALSE	0	186.349	33	31	197	31	1	1170	131.4	5.47	High	High	High	High	High	High	1.37552e+07	1.94456e+07	7.92302e+06	8.82672e+07	7.71889e+07	6.66518e+07
cbdbA1210	High	Master Protein	Q3ZYI7	Radical SAM domain protein OS=Dehalococcoides mccartyi (strain CBDB1) GN=cbdbA1210 PE=4 SV=1	FALSE	0	185.491	54	29	315	29	1	503	56.8	9.23	High	High	High	High	High	High	4.59888e+07	4.25843e+07	1.53662e+07	2.07483e+08	1.32672e+08	1.03972e+08
cbdbA1459	High	Master Protein	Q3ZZ02	Peptide ABC transporter, ATP-binding protein OS=Dehalococcoides mccartyi (strain CBDB1) GN=cbdbA1459 PE=4 SV=1	FALSE	0	185.381	86	19	217	19	1	322	35.1	6.6	High	High	High	High	High	High	9.16474e+06	1.54978e+07	8.61205e+06	1.72524e+08	1.6813e+08	1.32494e+08
cbdbA474	High	Master Protein	Q3ZZN9	Phosphoglucomutase OS=Dehalococcoides mccartyi (strain CBDB1) GN=cbdbA474 PE=3 SV=1	FALSE	0	185.302	64	25	292	25	1	471	51.5	5.47	High	High	High	High	High	High	2.36645e+07	2.91265e+07	2.84777e+07	1.23106e+08	1.38253e+08	1.28462e+08
cbdbA848	High	Master Protein	Q3ZXP6	Hydrogenase subunit HymC OS=Dehalococcoides mccartyi (strain CBDB1) GN=cbdbA848 PE=4 SV=1	FALSE	0	185.226	91	20	357	20	1	197	21.7	7.47	High	High	High	High	High	High	9.27938e+07	1.19316e+08	1.26873e+08	5.05285e+08	5.13777e+08	4.5369e+08
cbdbA1204	High	Master Protein	Q3ZYJ1	Malonyl CoA-acyl carrier protein transacylase OS=Dehalococcoides mccartyi (strain CBDB1) GN=fabD PE=3 SV=1	FALSE	0	185.2	78	17	318	17	1	310	32.7	6.67	High	High	High	High	High	High	3.92605e+07	5.35536e+07	3.70126e+07	4.57402e+08	4.49128e+08	3.45104e+08
cbdbA1135	High	Master Protein	Q3ZYA2	Acetyltransferase, GNAT family OS=Dehalococcoides mccartyi (strain CBDB1) GN=cbdbA1135 PE=4 SV=1	FALSE	0	184.887	91	17	263	17	1	163	17.8	4.83	High	High	High	High	High	High	4.74775e+07	4.89784e+07	5.15142e+07	3.50049e+08	3.4961e+08	2.11972e+08
cbdbA512	High	Master Protein	Q3ZZR1	ATP-binding protein, DnaC family OS=Dehalococcoides mccartyi (strain CBDB1) GN=cbdbA512 PE=4 SV=1	FALSE	0	184.823	72	29	258	29	1	435	49.2	7.62	High	High	High	High	High	High	1.75052e+07	2.26385e+07	1.58567e+07	1.6151e+08	8.05039e+07	1.10003e+08
cbdbA185	High	Master Protein	Q3ZWP1	Sensor histidine kinase OS=Dehalococcoides mccartyi (strain CBDB1) GN=rdhC PE=4 SV=1	FALSE	0	184.046	50	25	179	25	1	597	67.7	5.53	High	High	High	High	High	High	6.74867e+06	1.32856e+07	4.92329e+06	1.20618e+08	1.1405e+08	1.19218e+08
cbdbA1419	High	Master Protein	Q3ZYZ2	50S ribosomal protein L25 OS=Dehalococcoides mccartyi (strain CBDB1) GN=rplY PE=3 SV=1	FALSE	0	183.837	72	16	319	16	1	218	24.3	6.54	High	High	High	High	High	High	4.7422e+07	7.80003e+07	6.39973e+07	4.13911e+08	4.98716e+08	3.39457e+08
cbdbA772	High	Master Protein	Q3ZXG9	ABC transporter associated protein with signal peptide, putative periplasmic substrate binding subunit OS=Dehalococcoides mccartyi (strain CBDB1) GN=cbdbA772 PE=4 SV=1	FALSE	0	183.582	64	15	388	15	1	243	27.9	5.2	High	High	High	High	High	High	7.67918e+07	8.29911e+07	6.95299e+07	4.28752e+08	3.61388e+08	3.55361e+08
cbdbA1014	High	Master Protein	Q3ZY19	Putative SpoIIIJ-associated protein Jag OS=Dehalococcoides mccartyi (strain CBDB1) GN=cbdbA1014 PE=4 SV=1	FALSE	0	183.355	83	19	291	19	1	193	21.8	4.94	High	High	High	High	High	High	4.84857e+07	7.46887e+07	3.43974e+07	5.09342e+08	4.58881e+08	3.7718e+08
cbdbA1700	High	Master Protein	Q3ZW84	Protein RecA OS=Dehalococcoides mccartyi (strain CBDB1) GN=recA PE=3 SV=1	FALSE	0	182.616	68	23	317	23	1	337	36	6.42	High	High	High	High	High	High	2.71241e+07	4.90286e+07	5.89627e+07	2.87039e+08	4.0805e+08	2.59108e+08
cbdbA955	High	Master Protein	Q3ZXX9	50S ribosomal protein L10 OS=Dehalococcoides mccartyi (strain CBDB1) GN=rplJ PE=3 SV=1	FALSE	0	182.318	86	15	270	15	1	176	18.9	9.86	High	High	High	High	High	High	3.85036e+07	4.62334e+07	5.76443e+07	3.71116e+08	1.1356e+09	3.6753e+08
cbdbA440	High	Master Protein	Q3ZZM3	50S ribosomal protein L4 OS=Dehalococcoides mccartyi (strain CBDB1) GN=rplD PE=3 SV=1	FALSE	0	179.102	74	19	690	19	1	210	23.3	10.04	High	High	High	High	High	High	2.61089e+08	2.71065e+08	1.83907e+08	1.67091e+09	1.78141e+09	1.77959e+09
cbdbA1224	High	Master Protein	Q3ZYH9	Gamma-glutamyl phosphate reductase OS=Dehalococcoides mccartyi (strain CBDB1) GN=proA PE=3 SV=1	FALSE	0	177.965	74	27	212	27	1	424	45.5	6.67	High	High	High	High	High	High	2.17816e+07	2.79069e+07	2.93892e+07	1.81976e+08	1.84598e+08	1.55644e+08
cbdbA1316	High	Master Protein	Q3ZYP4	Glutamate--tRNA ligase OS=Dehalococcoides mccartyi (strain CBDB1) GN=gltX PE=3 SV=1	FALSE	0	177.416	61	24	213	24	1	487	55.5	6.61	High	High	High	High	High	High	7.71399e+06	1.04583e+07	5.83487e+06	1.94545e+08	1.97167e+08	1.99911e+08
cbdbA1675	High	Master Protein	Q3ZW63	LemA family protein OS=Dehalococcoides mccartyi (strain CBDB1) GN=cbdbA1675 PE=4 SV=1	FALSE	0	177.096	77	17	505	17	1	188	21.3	8.85	High	High	High	High	High	High	2.76372e+08	1.6995e+08	2.57423e+08	6.33819e+08	5.9873e+08	5.9925e+08
cbdbA743	High	Master Protein	Q3ZXE6	Transcription elongation factor GreA OS=Dehalococcoides mccartyi (strain CBDB1) GN=greA PE=3 SV=1	FALSE	0	177.088	79	15	269	15	1	170	19	8.53	High	High	High	High	High	High	2.27922e+07	5.10436e+07	4.88772e+07	1.81768e+08	2.01526e+08	1.85274e+08
cbdbA455	High	Master Protein	Q3ZZQ7	30S ribosomal protein S5 OS=Dehalococcoides mccartyi (strain CBDB1) GN=rpsE PE=3 SV=1	FALSE	0	174.991	74	17	404	17	1	172	17.8	10.26	High	High	High	High	High	High	1.26066e+08	1.67016e+08	1.37132e+08	1.51454e+09	1.24097e+09	1.15e+09
cbdbA799	High	Master Protein	Q3ZXJ2	Conserved domain protein OS=Dehalococcoides mccartyi (strain CBDB1) GN=cbdbA799 PE=4 SV=1	FALSE	0	174.036	79	17	218	17	1	196	22.6	5.78	High	High	High	High	High	High	1.92e+07	1.81444e+07	1.86458e+07	158191413	1.97503e+08	1.36348e+08
cbdbA469	High	Master Protein	Q3ZZP3	50S ribosomal protein L13 OS=Dehalococcoides mccartyi (strain CBDB1) GN=rplM PE=3 SV=1	FALSE	0	173.855	81	17	479	17	1	143	15.9	9.5	High	High	High	High	High	High	2.00254e+08	1.81272e+08	2.61277e+08	1.5149e+09	1.63225e+09	1.17962e+09
cbdbA1465	High	Master Protein	Q3ZZ42	Uncharacterized protein OS=Dehalococcoides mccartyi (strain CBDB1) GN=cbdbA1465 PE=4 SV=1	FALSE	0	173.597	61	17	308	17	1	273	31.1	5.92	High	High	High	High	High	High	9.37122e+07	9.85838e+07	1.11107e+08	5.20539e+08	7.0589e+08	5.97097e+08
cbdbA1326	High	Master Protein	Q3ZYT2	Putative dnaK suppressor protein OS=Dehalococcoides mccartyi (strain CBDB1) GN=cbdbA1326 PE=4 SV=1	FALSE	0	173.494	72	18	201	18	1	123	14	6.68	High	High	High	High	High	High	6.19818e+07	7.0704e+07	7.7043e+07	2.41074e+08	2.94002e+08	1.37795e+08
cbdbA645	High	Master Protein	Q3ZX50	Thioredoxin OS=Dehalococcoides mccartyi (strain CBDB1) GN=trx PE=3 SV=1	FALSE	0	172.084	94	11	479	11	1	107	11.9	8.27	High	High	High	High	High	High	3.31979e+08	3.98502e+08	4.41078e+08	2.09759e+09	2.40098e+09	1.67057e+09
cbdbA1117	High	Master Protein	Q3ZYB8	Carbamoyl-phosphate synthase small chain OS=Dehalococcoides mccartyi (strain CBDB1) GN=carA PE=3 SV=1	FALSE	0	171.765	65	21	205	21	1	364	40.2	7.96	High	High	High	High	High	High	2.2457e+07	2.49511e+07	3.19364e+07	1.76744e+08	2.15322e+08	1.15446e+08
cbdbA1357	High	Master Protein	Q3ZYV2	Chaperone protein DnaJ OS=Dehalococcoides mccartyi (strain CBDB1) GN=dnaJ PE=3 SV=1	FALSE	0	171.738	53	24	302	24	1	359	39.1	7.11	High	High	High	High	High	High	2.94846e+07	3.15756e+07	2.11772e+07	1.40005e+08	1.85384e+08	1.20102e+08
cbdbA411	High	Master Protein	Q3ZZJ5	Putative fumarate hydratase, alpha subunit OS=Dehalococcoides mccartyi (strain CBDB1) GN=cbdbA411 PE=4 SV=1	FALSE	0	171.545	73	21	236	21	1	280	29.7	6.95	High	High	High	High	High	High	1.99117e+07	2.73259e+07	1.52759e+07	1.67393e+08	2.08659e+08	1.56842e+08
cbdbA227	High	Master Protein	Q3ZWT4	Uncharacterized protein OS=Dehalococcoides mccartyi (strain CBDB1) GN=cbdbA227 PE=4 SV=1	FALSE	0	170.981	44	11	479	11	1	285	31	4.59	High	High	High	High	High	High	8.97349e+07	7.98129e+07	4.71275e+07	5.863e+08	4.96242e+08	6.28144e+08
cbdbA1453	High	Master Protein	Q3ZZ08	Putative reductive dehalogenase OS=Dehalococcoides mccartyi (strain CBDB1) GN=rdhA PE=4 SV=1	FALSE	0	170.819	54	19	187	19	1	495	54.3	6.64	High	High	High	High	High	High	2.28001e+07	1.9751e+07	5.89225e+06	7.2595e+07	6.3527e+07	4.22654e+07
cbdbA517	High	Master Protein	Q3ZZV6	Phosphate acyltransferase OS=Dehalococcoides mccartyi (strain CBDB1) GN=plsX PE=3 SV=1	FALSE	0	170.459	64	23	290	23	1	347	36.6	8.7	High	High	High	High	High	High	3.80759e+07	4.61436e+07	4.41237e+07	2.86075e+08	2.56594e+08	2.24463e+08
cbdbA563	High	Master Protein	Q3ZWX1	Putative DNA polymerase III, gamma and tau subunits OS=Dehalococcoides mccartyi (strain CBDB1) GN=dnaX PE=4 SV=1	FALSE	0	168.966	52	25	242	25	1	570	62.2	8	High	High	High	High	High	High	2.51644e+07	3.33912e+07	4.10132e+07	1.5267e+08	1.55012e+08	1.18118e+08
cbdbA311	High	Master Protein	Q3ZZC9	4-hydroxy-3-methylbut-2-en-1-yl diphosphate synthase OS=Dehalococcoides mccartyi (strain CBDB1) GN=ispG PE=3 SV=1	FALSE	0	168.81	71	24	227	24	1	348	37.1	8.21	High	High	High	High	High	High	1.29994e+07	1.02511e+07	1.8657e+07	1.08156e+08	1.24925e+08	9.52054e+07
cbdbA714	High	Master Protein	Q3ZXC8	LL-diaminopimelate aminotransferase OS=Dehalococcoides mccartyi (strain CBDB1) GN=dapL PE=3 SV=1	FALSE	0	168.808	63	22	237	22	1	388	42.3	7.8	High	High	High	High	High	High	4.45811e+07	6.02661e+07	5.83713e+07	4.93586e+08	5.02395e+08	4.25955e+08
cbdbA451	High	Master Protein	Q3ZZL2	50S ribosomal protein L5 OS=Dehalococcoides mccartyi (strain CBDB1) GN=rplE PE=3 SV=1	FALSE	0	168.332	84	16	331	16	1	179	20.1	9.31	High	High	High	High	High	High	6.53204e+07	5.31985e+07	1.48859e+08	3.63801e+08	1.23543e+09	2.77079e+08
cbdbA1026	High	Master Protein	Q3ZY07	DNA repair protein RecN OS=Dehalococcoides mccartyi (strain CBDB1) GN=recN PE=3 SV=1	FALSE	0	167.317	51	22	118	22	1	588	65	5.38	High	High	High	High	High	High	8.5919e+06	1.16587e+07	1.42645e+07	7.1609e+07	4.24183e+07	5.03266e+07
cbdbA1190	High	Master Protein	Q3ZYF6	DegV family protein OS=Dehalococcoides mccartyi (strain CBDB1) GN=cbdbA1190 PE=4 SV=1	FALSE	0	167.183	79	20	278	20	1	279	30.5	6.4	High	High	High	High	High	High	4.13969e+07	5.46167e+07	5.69229e+07	2.95501e+08	2.87422e+08	2.24191e+08
cbdbA608	High	Master Protein	Q3ZX28	Ribonucleotide reductase OS=Dehalococcoides mccartyi (strain CBDB1) GN=nrd PE=4 SV=1	FALSE	0	166.573	47	25	221	23	1	599	66.3	6.34	High	High	High	High	High	High	3.42918e+07	5.57495e+07	5.35495e+07	2.82526e+08	2.24176e+08	2.38468e+08
cbdbA68	High	Master Protein	Q3ZWC1	Queuine tRNA-ribosyltransferase OS=Dehalococcoides mccartyi (strain CBDB1) GN=tgt PE=3 SV=1	FALSE	0	166.068	67	20	149	20	1	392	44	6.93	High	High	High	High	High	High	1.22495e+07	1.64766e+07	1.13006e+07	1.13959e+08	1.43915e+08	7.13827e+07
cbdbA516	High	Master Protein	Q3ZZV7	Thioredoxin reductase OS=Dehalococcoides mccartyi (strain CBDB1) GN=trxB PE=3 SV=1	FALSE	0	165.579	74	17	327	17	1	306	32.7	5.96	High	High	High	High	High	High	4.62949e+07	5.90549e+07	7.59814e+07	3.24012e+08	3.57476e+08	2.85949e+08
cbdbA1734	High	Master Protein	Q3ZZW6	Bisphosphoglycerate-independent phosphoglycerate mutase OS=Dehalococcoides mccartyi (strain CBDB1) GN=cbdbA1734 PE=4 SV=1	FALSE	0	165.513	77	21	202	21	1	393	42.5	6.47	High	High	High	High	High	High	3.67768e+07	4.42202e+07	1.46123e+07	2.35413e+08	2.17127e+08	1.91942e+08
cbdbA148	High	Master Protein	Q3ZWK0	Sensor histidine kinase OS=Dehalococcoides mccartyi (strain CBDB1) GN=cbdbA148 PE=4 SV=1	FALSE	0	163.591	28	25	197	24	1	1062	120	5.94	High	High	High	High	High	High	1.86262e+07	2.22622e+07	9681565	9.55248e+07	4.59565e+07	5.3608e+07
cbdbA1159	High	Master Protein	Q3ZYD0	Peptidyl-prolyl cis-trans isomerase OS=Dehalococcoides mccartyi (strain CBDB1) GN=ppiB PE=3 SV=1	FALSE	0	163.128	72	13	513	13	1	208	22.4	7.94	High	High	High	High	High	High	2.25505e+08	2.59408e+08	2.4995e+08	1.49393e+09	1.55855e+09	1.41361e+09
cbdbA1450	High	Master Protein	Q3ZZ11	Tryptophan synthase beta chain OS=Dehalococcoides mccartyi (strain CBDB1) GN=trpB PE=3 SV=1	FALSE	0	162.473	56	20	219	20	1	399	42.9	7.58	High	High	High	High	High	High	4.74308e+07	6.07897e+07	6.73063e+07	4.46387e+08	4.66324e+08	3.58475e+08
cbdbA717	High	Master Protein	Q3ZXC5	Triosephosphate isomerase OS=Dehalococcoides mccartyi (strain CBDB1) GN=tpiA PE=3 SV=1	FALSE	0	162.081	83	19	307	19	1	253	27.4	6.05	High	High	High	High	High	High	3.9471e+07	4.20406e+07	5.68535e+07	4.7806e+08	4.34997e+08	3.49138e+08
cbdbA482	High	Master Protein	Q3ZZT2	S-methyl-5'-thioadenosine phosphorylase OS=Dehalococcoides mccartyi (strain CBDB1) GN=mtaP PE=3 SV=1	FALSE	0	161.76	63	15	254	15	1	294	31.9	6.95	High	High	High	High	High	High	7.35744e+06	4.54694e+07	2.0041e+07	2.93035e+08	3.03206e+08	258726024
cbdbA1522	High	Master Protein	Q3ZZ75	Putative CRISPR-associated helicase Cas3 OS=Dehalococcoides mccartyi (strain CBDB1) GN=cas3 PE=4 SV=1	FALSE	0	161.529	43	28	106	28	1	897	100.9	6.11	High	High	High	High	High	High	8.06622e+06	7.9451e+06	7.50915e+06	4.73402e+07	3.92038e+07	3.03299e+07
cbdbA1006	High	Master Protein	Q3ZY24	Acyl-CoA synthetase (AMP-forming) / AMP-acid ligase OS=Dehalococcoides mccartyi (strain CBDB1) GN=cbdbA1006 PE=4 SV=1	FALSE	0	161.396	58	28	212	28	1	505	55.6	5.99	High	High	High	High	High	High	1.33488e+07	1.70403e+07	1.58957e+07	1.39136e+08	1.14034e+08	7.77462e+07
cbdbA124	High	Master Protein	Q3ZWG8	DegV family protein OS=Dehalococcoides mccartyi (strain CBDB1) GN=cbdbA124 PE=4 SV=1	FALSE	0	161.014	71	17	273	17	1	279	29.9	8.48	High	High	High	High	High	High	3.19515e+07	3.73376e+07	7.68943e+07	3.4926e+08	7.59433e+08	3.03305e+08
cbdbA535	High	Master Protein	Q3ZZU0	ATP synthase subunit delta OS=Dehalococcoides mccartyi (strain CBDB1) GN=atpH PE=3 SV=1	FALSE	0	160.169	73	16	320	16	1	180	19.9	9.36	High	High	High	High	High	High	3.18302e+07	3.54449e+07	4.4316e+07	6.98895e+08	8.678e+08	4.53192e+08
cbdbA1338	High	Master Protein	Q3ZYS2	L-aspartate oxidase OS=Dehalococcoides mccartyi (strain CBDB1) GN=nabD PE=4 SV=1	FALSE	0	159.865	53	25	179	25	1	515	56.4	6.14	High	High	High	High	High	High	1.01936e+07	1.46795e+07	1.57288e+07	106688320	1.06964e+08	8.65898e+07
cbdbA861	High	Master Protein	Q3ZXN4	Aminopeptidase protein OS=Dehalococcoides mccartyi (strain CBDB1) GN=cbdbA861 PE=4 SV=1	FALSE	0	158.71	51	20	287	20	1	369	41.5	5.53	High	High	High	High	High	High	4.55926e+07	8.63976e+07	8.81634e+07	6.12032e+08	6.27484e+08	5.37601e+08
cbdbA1179	High	Master Protein	Q3ZYG4	Arginine biosynthesis bifunctional protein ArgJ OS=Dehalococcoides mccartyi (strain CBDB1) GN=argJ PE=3 SV=1	FALSE	0	158.377	51	18	318	18	1	405	43.1	5.78	High	High	High	High	High	High	3.1353e+07	4.59856e+07	4.15072e+07	2.92699e+08	2.57689e+08	2.43062e+08
cbdbA435	High	Master Protein	Q3ZZM7	30S ribosomal protein S7 OS=Dehalococcoides mccartyi (strain CBDB1) GN=rpsG PE=3 SV=1	FALSE	0	157.553	62	14	629	14	1	156	17.9	10.59	High	High	High	High	High	High	2.94544e+08	3.31282e+08	2.70353e+08	1.52271e+09	1.85187e+09	1.16578e+09
cbdbA567	High	Master Protein	Q3ZWW7	Uncharacterized protein OS=Dehalococcoides mccartyi (strain CBDB1) GN=cbdbA567 PE=4 SV=1	FALSE	0	156.53	77	16	265	16	1	124	13.9	6.13	High	High	High	High	High	High	1.33662e+08	1.67375e+08	2.17174e+08	1.1425e+09	1.12455e+09	1.00428e+09
cbdbA1729	High	Master Protein	Q3ZZX0	TPR domain protein OS=Dehalococcoides mccartyi (strain CBDB1) GN=cbdbA1729 PE=4 SV=1	FALSE	0	156.394	66	21	454	21	1	268	30	4.75	High	High	High	High	High	High	7.96646e+07	8.54212e+07	9.77632e+07	4.44717e+08	4.48247e+08	3.86065e+08
cbdbA1191	High	Master Protein	Q3ZYF5	DegV family protein OS=Dehalococcoides mccartyi (strain CBDB1) GN=cbdbA1191 PE=4 SV=1	FALSE	0	156.128	75	14	358	14	1	280	30.3	7.43	High	High	High	High	High	High	3.81171e+07	3.98668e+07	5.23491e+07	3.9268e+08	4.19118e+08	1.98213e+08
cbdbA40	High	Master Protein	Q3ZWE0	Uncharacterized protein OS=Dehalococcoides mccartyi (strain CBDB1) GN=cbdbA40 PE=4 SV=1	FALSE	0	156.082	70	17	156	17	1	209	23.7	5.25	High	High	High	High	High	High	5.77012e+06	4.70336e+06	8.20114e+06	1.02076e+08	9.22374e+07	7.82633e+07
cbdbA335	High	Master Protein	Q3ZZD5	Heptaprenyl diphosphate synthase component II OS=Dehalococcoides mccartyi (strain CBDB1) GN=hepT PE=3 SV=1	FALSE	0	155.35	59	20	149	20	1	326	35.6	5.47	High	High	High	High	High	High	4.07635e+06	1.28083e+07	1.61585e+07	1.04229e+08	1.12028e+08	1.05144e+08
cbdbA351	High	Master Protein	Q3ZZF0	3-dehydroquinate synthase OS=Dehalococcoides mccartyi (strain CBDB1) GN=aroB PE=3 SV=1	FALSE	0	155.225	55	16	186	16	1	364	40.3	6.86	High	High	High	High	High	High	2.11866e+07	51703018	2.81319e+07	2.82596e+08	2.86009e+08	1.95638e+08
cbdbA1018	High	Master Protein	Q3ZY14	30S ribosomal protein S18 OS=Dehalococcoides mccartyi (strain CBDB1) GN=rpsR PE=3 SV=1	FALSE	0	155.213	69	17	546	17	1	147	16.5	10.45	High	High	High	High	High	High	6.09408e+08	5.73387e+08	6.24744e+08	2.53302e+09	2.60133e+09	1.42252e+09
cbdbA407	High	Master Protein	Q3ZZJ9	3-isopropylmalate dehydratase small subunit OS=Dehalococcoides mccartyi (strain CBDB1) GN=leuD PE=3 SV=1	FALSE	0	155.008	89	19	536	19	1	167	18.1	6.95	High	High	High	High	High	High	1.39936e+08	1.95025e+08	1.56164e+08	1.1332e+09	1.00473e+09	9.38743e+08
cbdbA1521	High	Master Protein	Q3ZZ76	Uncharacterized protein OS=Dehalococcoides mccartyi (strain CBDB1) GN=cbdbA1521 PE=4 SV=1	FALSE	0	154.782	50	21	169	21	1	543	61.5	6.05	High	High	High	High	High	High	2.12382e+07	2.4545e+07	2.03788e+07	9.64399e+07	8.33183e+07	8.94289e+07
cbdbA1234	High	Master Protein	Q3ZYH2	DNA-binding response regulator OS=Dehalococcoides mccartyi (strain CBDB1) GN=cbdbA1234 PE=4 SV=1	FALSE	0	154.65	69	13	241	13	1	180	20.3	7.4	High	High	High	High	High	High	1.34577e+07	1.6895e+07	2.69808e+07	4.18424e+08	4.99704e+08	3.52115e+08
cbdbA349	High	Master Protein	Q3ZZF2	Putative ubiquinone/menaquinone biosynthesis methlytransferase UbiE OS=Dehalococcoides mccartyi (strain CBDB1) GN=cbdbA349 PE=4 SV=1	FALSE	0	153.901	58	12	396	12	1	258	29.6	8.94	High	High	High	High	High	High	9.38408e+07	1.04392e+08	7.20532e+07	3.9743e+08	4.01925e+08	3.761e+08
cbdbA14	High	Master Protein	Q3ZWB0	Orotidine 5'-phosphate decarboxylase OS=Dehalococcoides mccartyi (strain CBDB1) GN=pyrF PE=3 SV=1	FALSE	0	153.892	76	18	242	18	1	270	30	5.41	High	High	High	High	High	High	3.54687e+07	5.20487e+07	4.1487e+07	2.7844e+08	322790952	1.98695e+08
cbdbA1063	High	Master Protein	Q3ZY71	Cysteine synthase OS=Dehalococcoides mccartyi (strain CBDB1) GN=cysK PE=3 SV=1	FALSE	0	152.621	75	18	162	18	1	320	34	8.79	High	High	High	High	High	High	6.22999e+06	7.31449e+06	1.63541e+07	2.55315e+08	2.39474e+08	150861559
cbdbA449	High	Master Protein	Q3ZZL4	50S ribosomal protein L14 OS=Dehalococcoides mccartyi (strain CBDB1) GN=rplN PE=3 SV=1	FALSE	0	152.332	66	12	380	12	1	122	13.2	9.91	High	High	High	High	High	High	1.12528e+08	1.34114e+08	2.02879e+08	6.10998e+08	6.71807e+08	4.06052e+08
cbdbA520	High	Master Protein	Q3ZZV4	Amidohydrolase family protein OS=Dehalococcoides mccartyi (strain CBDB1) GN=cbdbA520 PE=4 SV=1	FALSE	0	151.954	56	17	121	17	1	397	42.3	6.11	High	High	High	High	High	High	2.94958e+06	4.91904e+06	1.94285e+06	8.45361e+07	9.92713e+07	7.82247e+07
cbdbA1635	High	Master Protein	Q3ZVZ8	Uncharacterized protein OS=Dehalococcoides mccartyi (strain CBDB1) GN=cbdbA1635 PE=4 SV=1	FALSE	0	151.925	75	12	359	12	1	277	30.6	4.96	High	High	High	High	High	High	5.23854e+08	4.88978e+08	4.3485e+08	2.48254e+09	2.19739e+09	2.01056e+09
cbdbA1111	High	Master Protein	Q3ZY76	ATP-dependent DNA helicase PcrA OS=Dehalococcoides mccartyi (strain CBDB1) GN=pcrA PE=4 SV=1	FALSE	0	151.839	48	31	244	31	1	738	83.1	7.02	High	High	High	High	High	High	1.44689e+07	1.76625e+07	1.89019e+07	4.93493e+07	4.3107e+07	4.93972e+07
cbdbA561	High	Master Protein	Q3ZWX3	Recombination protein RecR OS=Dehalococcoides mccartyi (strain CBDB1) GN=recR PE=3 SV=1	FALSE	0	151.322	90	14	163	14	1	204	22.5	6.33	High	High	High	High	High	High	1.99354e+07	3.49989e+07	2.06823e+07	1.58826e+08	9.98266e+07	1.09826e+08
cbdbA1378	High	Master Protein	Q3ZYY1	Phosphoribosylformylglycinamidine cyclo-ligase OS=Dehalococcoides mccartyi (strain CBDB1) GN=purM PE=3 SV=1	FALSE	0	150.862	54	15	262	15	1	340	36.4	6.19	High	High	High	High	High	High	1.48024e+07	2.26831e+07	3.35318e+07	2.02807e+08	1.51865e+08	1.44118e+08
cbdbA1180	High	Master Protein	Q3ZYG3	Acetylglutamate kinase OS=Dehalococcoides mccartyi (strain CBDB1) GN=argB PE=3 SV=1	FALSE	0	150.658	74	16	229	16	1	272	28.1	6.8	High	High	High	High	High	High	5.73888e+07	8.38562e+07	5.64187e+07	3.51131e+08	3.34816e+08	3.13184e+08
cbdbA385	High	Master Protein	Q3ZZG8	Sensor histidine kinase OS=Dehalococcoides mccartyi (strain CBDB1) GN=cbdbA385 PE=4 SV=1	FALSE	0	150.126	69	21	192	21	1	357	40.5	6.7	High	High	High	High	High	High	3.38249e+07	4.60916e+07	5.51514e+07	1.71781e+08	1.62624e+08	1.32579e+08
cbdbA1137	High	Master Protein	Q3ZYA0	DNA mismatch repair protein MutS OS=Dehalococcoides mccartyi (strain CBDB1) GN=mutS PE=3 SV=1	FALSE	0	149.919	37	26	168	26	1	858	95.6	6.35	High	High	High	High	High	High	8.81756e+06	1.29168e+07	1.37553e+07	9.68844e+07	7.76643e+07	7.69277e+07
cbdbA957	High	Master Protein	Q3ZXX7	50S ribosomal protein L11 OS=Dehalococcoides mccartyi (strain CBDB1) GN=rplK PE=3 SV=1	FALSE	0	149.888	83	17	429	17	1	140	14.7	9.67	High	High	High	High	High	High	1.70412e+08	1.92659e+08	2.17495e+08	1.31622e+09	1.21382e+09	9.91676e+08
cbdbA1102	High	Master Protein	Q3ZY85	6,7-dimethyl-8-ribityllumazine synthase OS=Dehalococcoides mccartyi (strain CBDB1) GN=ribH PE=3 SV=1	FALSE	0	149.606	92	12	371	12	1	155	16.3	7.34	High	High	High	High	High	High	1.53602e+08	2.05588e+08	2.21687e+08	1.16212e+09	1.33612e+09	1.21594e+09
cbdbA454	High	Master Protein	Q3ZZQ8	50S ribosomal protein L18 OS=Dehalococcoides mccartyi (strain CBDB1) GN=rplR PE=3 SV=1	FALSE	0	149.37	60	14	403	14	1	121	13.3	9.88	High	High	High	High	High	High	5.95069e+07	7.46259e+07	2.88629e+07	6.27482e+08	6.46378e+08	4.15362e+08
cbdbA1291	High	Master Protein	Q3ZYL9	Transcriptional regulator, AsnC family OS=Dehalococcoides mccartyi (strain CBDB1) GN=cbdbA1291 PE=4 SV=1	FALSE	0	149.243	84	17	289	17	1	160	18	5.26	High	High	High	High	High	High	8.85031e+07	9.80376e+07	1.13232e+08	9.44668e+08	1.02975e+09	7.54765e+08
cbdbA1385	High	Master Protein	Q3ZYX5	tRNA(Ile)-lysidine synthase OS=Dehalococcoides mccartyi (strain CBDB1) GN=tilS PE=3 SV=1	FALSE	0	148.797	50	21	149	21	1	471	53	6.42	High	High	High	High	High	High	6.53191e+06	4.79116e+06	2.06483e+07	1.10896e+08	8.1935e+07	1.03934e+08
cbdbA514	High	Master Protein	Q3ZZT4	Replicative DNA helicase OS=Dehalococcoides mccartyi (strain CBDB1) GN=dnaB PE=4 SV=1	FALSE	0	148.689	47	20	234	20	1	458	51.4	5.3	High	High	High	High	High	High	4.63092e+07	5.79146e+07	4.75822e+07	2.07584e+08	1.23688e+08	1.52191e+08
cbdbA1730	High	Master Protein	Q3ZZW9	NifU protein, homolog OS=Dehalococcoides mccartyi (strain CBDB1) GN=cbdbA1730 PE=4 SV=1	FALSE	0	148.687	96	10	511	10	1	72	7.7	5.11	High	High	High	High	High	High	3.58891e+08	3.87919e+08	2.95263e+08	1.74437e+09	1.81123e+09	1.69325e+09
cbdbA555	High	Master Protein	Q3ZWX9	Lysine--tRNA ligase OS=Dehalococcoides mccartyi (strain CBDB1) GN=lysS PE=3 SV=1	FALSE	0	148.004	59	24	155	24	1	498	56.8	5.72	High	High	High	High	High	High	2.36716e+07	2.55387e+07	3.93208e+07	1.82996e+08	1.66266e+08	1.54412e+08
cbdbA1015	High	Master Protein	Q3ZY18	Putative inner membrane protein, 60 kDa OS=Dehalococcoides mccartyi (strain CBDB1) GN=cbdbA1015 PE=3 SV=1	FALSE	0	147.402	20	12	215	12	1	315	35.6	9.66	High	High	High	High	High	High	7.1647e+07	1.01232e+08	9.51461e+07	3.32517e+08	3.05598e+08	3.23585e+08
cbdbA1061	High	Master Protein	Q3ZY73	Iron-sulfur cluster-binding protein OS=Dehalococcoides mccartyi (strain CBDB1) GN=cbdbA1061 PE=4 SV=1	FALSE	0	147.256	83	12	280	12	1	143	15.7	7.42	High	High	High	High	High	High	5.28696e+07	4.75318e+07	3.87158e+07	2.87024e+08	3.00188e+08	2.06812e+08
cbdbA1256	High	Master Protein	Q3ZYJ9	UPF0234 protein cbdbA1256 OS=Dehalococcoides mccartyi (strain CBDB1) GN=cbdbA1256 PE=3 SV=1	FALSE	0	147.209	66	16	301	16	1	163	18.5	7.14	High	High	High	High	High	High	6.54392e+07	8.9945e+07	4.97569e+07	4.88713e+08	5.17484e+08	4.56308e+08
cbdbA805	High	Master Protein	Q3ZXI6	3-isopropylmalate dehydratase small subunit OS=Dehalococcoides mccartyi (strain CBDB1) GN=leuD PE=3 SV=1	FALSE	0	146.891	90	14	371	14	1	166	18	5.39	High	High	High	High	High	High	2.10872e+08	1.86538e+08	2.74322e+08	1.3881e+09	1.35102e+09	1.07384e+09
cbdbA962	High	Master Protein	Q3ZXX2	Uncharacterized protein OS=Dehalococcoides mccartyi (strain CBDB1) GN=cbdbA962 PE=4 SV=1	FALSE	0	146.616	80	17	190	17	1	237	26.9	6.04	High	High	High	High	High	High	3.19098e+07	2.04332e+07	2.2234e+07	2.79275e+08	2.89579e+08	2.55949e+08
cbdbA1276	High	Master Protein	Q3ZYN1	Phosphoribosyl-AMP cyclohydrolase OS=Dehalococcoides mccartyi (strain CBDB1) GN=hisI PE=4 SV=1	FALSE	0	144.762	87	12	214	12	1	104	11.7	6.07	High	High	High	High	High	High	2.86691e+07	2.50037e+07	3.43427e+07	3.30863e+08	2.71072e+08	2.84907e+08
cbdbA1681	High	Master Protein	Q3ZW59	Quinolinate synthase A OS=Dehalococcoides mccartyi (strain CBDB1) GN=nadA PE=3 SV=1	FALSE	0	143.358	69	18	134	18	1	302	33.2	7.4	High	High	High	High	High	High	1.79566e+07	1.61483e+07	1.71016e+07	9.10395e+07	9.70236e+07	9.57616e+07
cbdbA1401	High	Master Protein	Q3ZYW2	Hydrogenase expression/formation protein HypD OS=Dehalococcoides mccartyi (strain CBDB1) GN=hypD PE=4 SV=1	FALSE	0	143.049	62	17	152	17	1	364	39.8	6.76	High	High	High	High	High	High	1.11169e+07	1.41132e+07	1.42766e+07	1.44429e+08	1.90218e+08	1.22914e+08
cbdbA307	High	Master Protein	Q3ZZD3	Phenylalanine--tRNA ligase alpha subunit OS=Dehalococcoides mccartyi (strain CBDB1) GN=pheS PE=3 SV=1	FALSE	0	143.021	53	19	202	19	1	346	39.1	6.55	High	High	High	High	High	High	8.78198e+07	1.24481e+08	1.40836e+08	5.74469e+08	6.03214e+08	4.70043e+08
cbdbA478	High	Master Protein	Q3ZZN5	Uncharacterized protein OS=Dehalococcoides mccartyi (strain CBDB1) GN=cbdbA478 PE=4 SV=1	FALSE	0	142.832	48	22	150	22	1	520	59.3	7.23	High	High	High	High	High	High	1.23007e+07	2.35056e+07	2.04953e+07	1.69939e+08	1.40378e+08	3.88599e+07
cbdbA872	High	Master Protein	Q3ZXP8	Uncharacterized protein OS=Dehalococcoides mccartyi (strain CBDB1) GN=cbdbA872 PE=4 SV=1	FALSE	0	142.528	58	19	209	19	1	408	43.9	7.44	High	High	High	High	High	High	6.01744e+07	7.5542e+07	7.7694e+07	4.31529e+08	4.49156e+08	2.98785e+08
cbdbA659	High	Master Protein	Q3ZX41	Iron-sulfur cluster binding protein OS=Dehalococcoides mccartyi (strain CBDB1) GN=cbdbA659 PE=4 SV=1	FALSE	0	142.516	41	18	168	18	1	640	68.6	5.6	High	High	High	High	High	High	1.45383e+07	2.00644e+07	1.58653e+07	1.19845e+08	1.03064e+08	1.08697e+08
cbdbA1722	High	Master Protein	Q3ZZX5	N-acetyl-gamma-glutamyl-phosphate reductase OS=Dehalococcoides mccartyi (strain CBDB1) GN=argC PE=3 SV=1	FALSE	0	142.304	64	18	285	18	1	341	37.3	6.35	High	High	High	High	High	High	3.37991e+07	4.44486e+07	3.94471e+07	3.21205e+08	3.24321e+08	2.91989e+08
cbdbA1108	High	Master Protein	Q3ZY79	Orotate phosphoribosyltransferase OS=Dehalococcoides mccartyi (strain CBDB1) GN=pyrE PE=3 SV=1	FALSE	0	142.176	84	14	206	14	1	187	20.3	7.01	High	High	High	High	High	High	5.85475e+07	8.26518e+07	4.40874e+07	5.34523e+08	4.4924e+08	4.1074e+08
cbdbA294	High	Master Protein	Q3ZZ94	Uncharacterized protein OS=Dehalococcoides mccartyi (strain CBDB1) GN=cbdbA294 PE=4 SV=1	FALSE	0	141.299	24	10	505	10	1	587	59.9	5.02	High	High	High	High	High	High	2.11828e+08	2.19743e+08	1.85071e+08	1.80727e+09	1.98059e+09	1.38981e+09
cbdbA151	High	Master Protein	Q3ZWJ7	DNA-binding response regulator OS=Dehalococcoides mccartyi (strain CBDB1) GN=cbdbA151 PE=4 SV=1	FALSE	0	140.566	88	13	148	13	1	123	13.9	5.97	High	High	High	High	High	High	2.34286e+07	2.80908e+07	3.57682e+07	2.07465e+08	2.30776e+08	214897319
cbdbB11	High	Master Protein	Q3ZZB6	Uncharacterized protein OS=Dehalococcoides mccartyi (strain CBDB1) GN=cbdbA328.1 PE=4 SV=1	FALSE	0	140.457	62	12	269	12	1	256	27.4	4.91	High	High	High	High	High	High	2.84565e+07	3.47582e+07	2.10742e+07	4.93629e+08	5.05103e+08	5.12639e+08
cbdbA1237	High	Master Protein	Q3ZYG9	GTP-binding protein TypA OS=Dehalococcoides mccartyi (strain CBDB1) GN=typA PE=4 SV=1	FALSE	0	140.186	48	26	177	26	1	609	67.9	5.78	High	High	High	High	High	High	1.33991e+07	2.52779e+07	2.74513e+07	8.59757e+07	5.00366e+07	7.49803e+07
cbdbA130	High	Master Protein	Q3ZWL4	Ni/Fe hydrogenase small subunit OS=Dehalococcoides mccartyi (strain CBDB1) GN=hupS PE=4 SV=1	FALSE	0	139.158	43	12	477	12	1	354	37.1	6.71	High	High	High	High	High	High	1.36275e+08	1.73084e+08	4.78136e+07	2.3037e+09	2.37637e+09	1.5946e+09
cbdbA386	High	Master Protein	Q3ZZG7	DNA-binding response regulator, LuxR family OS=Dehalococcoides mccartyi (strain CBDB1) GN=cbdbA386 PE=4 SV=1	FALSE	0	138.5	77	15	265	15	1	232	25.4	6.61	High	High	High	High	High	High	5.15969e+07	7.2746e+07	90652795	5.22877e+08	5.61276e+08	4.35919e+08
cbdbA1248	High	Master Protein	Q3ZYK7	Putative hydrolase OS=Dehalococcoides mccartyi (strain CBDB1) GN=cbdbA1248 PE=4 SV=1	FALSE	0	137.981	65	18	128	18	1	275	31	6.04	High	High	High	High	High	High	2.0854e+07	2.27408e+07	1.94507e+07	1.02161e+08	1.64242e+08	4.46082e+07
cbdbA912	High	Master Protein	Q3ZXS9	Superoxide dismutase OS=Dehalococcoides mccartyi (strain CBDB1) GN=sodA PE=3 SV=1	FALSE	0	137.553	58	14	273	14	1	192	22	6.11	High	High	High	High	High	High	2.18101e+07	2.53667e+07	4.42627e+07	2.32501e+08	3.99664e+08	1.84216e+08
cbdbA1677	High	Master Protein	Q3ZW62	Protease HtpX homolog OS=Dehalococcoides mccartyi (strain CBDB1) GN=htpX PE=3 SV=1	FALSE	0	137.55	47	18	227	18	1	397	43.2	8.07	High	High	High	High	High	High	2.96882e+07	2.67508e+07	2.36006e+07	1.44922e+08	1.16308e+08	9.13133e+07
cbdbA484	High	Master Protein	Q3ZZT1	Methylthioribose-1-phosphate isomerase OS=Dehalococcoides mccartyi (strain CBDB1) GN=mtnA PE=3 SV=1	FALSE	0	137.389	70	18	230	18	1	332	35.9	6.24	High	High	High	High	High	High	6.17989e+07	7.02699e+07	6.4259e+07	1.78657e+08	1.25725e+08	1.43727e+08
cbdbA419	High	Master Protein	Q3ZZJ0	NAD kinase OS=Dehalococcoides mccartyi (strain CBDB1) GN=nadK PE=3 SV=1	FALSE	0	136.76	71	13	179	13	1	284	31.1	6.4	High	High	High	High	High	High	1.40174e+07	2.18495e+07	1.34606e+07	2.79904e+08	2.33273e+08	1.74352e+08
cbdbA720	High	Master Protein	Q3ZXC2	1-deoxy-D-xylulose-5-phosphate synthase OS=Dehalococcoides mccartyi (strain CBDB1) GN=dxs PE=3 SV=1	FALSE	0	136.203	35	20	152	20	1	647	70	7.03	High	High	High	High	High	High	9.65393e+06	1.54861e+07	1.04499e+07	1.615e+08	1.39987e+08	1.29763e+08
cbdbA539	High	Master Protein	Q3ZZT6	ATP synthase epsilon chain OS=Dehalococcoides mccartyi (strain CBDB1) GN=atpC PE=3 SV=1	FALSE	0	135.531	82	14	235	14	1	140	15.3	6.34	High	High	High	High	High	High	5.34601e+07	6.28615e+07	5.09628e+07	5.37553e+08	5.48119e+08	8.48205e+07
cbdbA689	High	Master Protein	Q3ZXA4	Oxidoreductase, short chaindehydrogenase OS=Dehalococcoides mccartyi (strain CBDB1) GN=cbdbA689 PE=3 SV=1	FALSE	0	135.14	56	13	175	13	1	264	27.3	6.81	High	High	High	High	High	High	1.38044e+07	18719624	3.75616e+07	5.10536e+08	7.17861e+08	3.58002e+08
cbdbA983	High	Master Protein	Q3ZXZ7	Uncharacterized protein OS=Dehalococcoides mccartyi (strain CBDB1) GN=cbdbA983 PE=4 SV=1	FALSE	0	134.509	76	7	387	7	1	83	9.2	5.48	High	High	High	High	High	High	6.4116e+07	7.17147e+07	7.6166e+07	8.06339e+08	8.04145e+08	7.99965e+08
cbdbA723	High	Master Protein	Q3ZXB8	50S ribosomal protein L20 OS=Dehalococcoides mccartyi (strain CBDB1) GN=rplT PE=3 SV=1	FALSE	0	133.907	55	8	322	8	1	119	12.9	11.41	High	High	High	High	High	High	1.08124e+08	8.93232e+07	5.49083e+07	1.0673e+09	1.02893e+09	7.97317e+08
cbdbA1639	High	Master Protein	Q3ZW44	Prephenate dehydratase OS=Dehalococcoides mccartyi (strain CBDB1) GN=pheA PE=4 SV=1	FALSE	0	133.685	58	17	172	17	1	276	31.2	6.89	High	High	High	High	High	High	1.52832e+07	2.5834e+07	4.27167e+07	1.36826e+08	1.87648e+08	2.14265e+08
cbdbA58	High	Master Protein	Q3ZWC8	Putative GTP-binding protein OS=Dehalococcoides mccartyi (strain CBDB1) GN=cbdbA58 PE=4 SV=1	FALSE	0	132.843	50	18	220	18	1	367	40.3	5.38	High	High	High	High	High	High	3.04896e+07	4.00145e+07	3.33413e+07	1.7243e+08	1.7669e+08	1.7304e+08
cbdbA819	High	Master Protein	Q3ZXM3	Phosphoribosylamine--glycine ligase OS=Dehalococcoides mccartyi (strain CBDB1) GN=purD PE=3 SV=1	FALSE	0	132.779	50	18	188	18	1	425	45.9	5.29	High	High	High	High	High	High	1.02467e+07	1.49265e+07	1.14401e+07	1.86556e+08	1.71755e+08	1.36158e+08
cbdbA1092	High	Master Protein	Q3ZY94	Putative reductive dehalogenase OS=Dehalococcoides mccartyi (strain CBDB1) GN=rdhA PE=4 SV=1	FALSE	0	132.591	61	19	76	19	1	532	58.6	6.68	Not Found	Not Found	Not Found	High	High	High				4.81637e+07	4.77299e+07	5.86573e+07
cbdbA1397	High	Master Protein	Q3ZYW5	Hydrogenase accessory protein HypB OS=Dehalococcoides mccartyi (strain CBDB1) GN=hypB PE=4 SV=1	FALSE	0	132.493	61	16	335	16	1	217	23.6	5.19	High	High	High	High	High	High	5.45914e+07	6.42657e+07	1.13724e+08	3.91066e+08	5.06516e+08	3.82995e+08
cbdbA1020	High	Master Protein	Q3ZY12	30S ribosomal protein S6 OS=Dehalococcoides mccartyi (strain CBDB1) GN=rpsF PE=3 SV=1	FALSE	0	132.026	78	15	315	15	1	109	12.6	8.34	High	High	High	High	High	High	5.02308e+07	2.06686e+08	3.02601e+08	1.27801e+09	1.537e+09	1.00966e+09
cbdbA895	High	Master Protein	Q3ZXQ3	Branched chain amino acid ABC transporter,ATP-binding protein OS=Dehalococcoides mccartyi (strain CBDB1) GN=cbdbA895 PE=3 SV=1	FALSE	0	131.845	75	12	132	12	1	263	29.5	8.88	High	High	High	High	High	High	1.90644e+07	1.21032e+07	1.24986e+07	1.9235e+08	1.87446e+08	1.18475e+08
cbdbA434	High	Master Protein	Q3ZZM8	30S ribosomal protein S12 OS=Dehalococcoides mccartyi (strain CBDB1) GN=rpsL PE=3 SV=1	FALSE	0	131.828	66	14	427	14	1	144	15.8	11.25	High	High	High	High	High	High	3.26124e+08	3.63113e+08	3.03327e+08	1381925826	1.52676e+09	1.1745e+09
cbdbA1417	High	Master Protein	Q3ZYZ4	Uncharacterized protein OS=Dehalococcoides mccartyi (strain CBDB1) GN=cbdbA1417 PE=4 SV=1	FALSE	0	131.707	51	17	244	17	1	325	37.3	6.7	High	High	High	High	High	High	2.69409e+07	4.87165e+07	3.3033e+07	1.59368e+08	1.92518e+08	1.68163e+08
cbdbA343	High	Master Protein	Q3ZZF6	Nucleoside diphosphate kinase OS=Dehalococcoides mccartyi (strain CBDB1) GN=ndk PE=3 SV=1	FALSE	0	131.555	74	9	391	9	1	142	15.7	7.58	High	High	High	High	High	High	1.66263e+08	2.57795e+08	1.68642e+08	1.33452e+09	1.47557e+09	1.03816e+09
cbdbA1372	High	Master Protein	Q3ZYU0	Chaperone protein DnaJ OS=Dehalococcoides mccartyi (strain CBDB1) GN=dnaJ PE=3 SV=1	FALSE	0	130.694	59	16	146	16	1	330	36.3	8.82	High	High	High	High	High	High	1.40777e+07	1.97544e+07	1.29133e+07	4.26615e+07	5.22751e+07	6.4599e+07
cbdbA577	High	Master Protein	Q3ZX08	DNA ligase OS=Dehalococcoides mccartyi (strain CBDB1) GN=ligA PE=3 SV=1	FALSE	0	130.667	39	20	114	20	1	677	75.2	6.64	High	High	High	High	High	High	7.98412e+06	7.23179e+06	6.58202e+06	4.52783e+07	6.28706e+07	6.98172e+07
cbdbA812	High	Master Protein	Q3ZXI1	Acetolactate synthase, small subunit OS=Dehalococcoides mccartyi (strain CBDB1) GN=ilvN PE=4 SV=1	FALSE	0	129.715	82	16	210	16	1	178	19.6	9.31	High	High	High	High	High	High	3.34415e+07	3.78492e+07	1.00212e+08	5.9286e+08	7.76202e+08	3.5964e+08
cbdbA761	High	Master Protein	Q3ZXD2	Putative K(+)-stimulated pyrophosphate-energized sodium pump OS=Dehalococcoides mccartyi (strain CBDB1) GN=hppA PE=3 SV=1	FALSE	0	129.567	22	15	256	15	1	679	69.5	5.88	High	High	High	High	High	High	4.42424e+07	4.74608e+07	2.86647e+07	1.88387e+08	8.1701e+07	1.61852e+08
cbdbA906	High	Master Protein	Q3ZXT4	NifU domain protein OS=Dehalococcoides mccartyi (strain CBDB1) GN=cbdbA906 PE=4 SV=1	FALSE	0	129.035	81	7	131	7	1	127	13.9	7.24	High	High	High	High	High	High	1.48841e+07	2.0871e+07	1.64389e+07	1.31132e+08	1.48315e+08	1.01359e+08
cbdbA309	High	Master Protein	Q3ZZD1	Inorganic pyrophosphatase OS=Dehalococcoides mccartyi (strain CBDB1) GN=ppa PE=3 SV=1	FALSE	0	128.731	48	17	173	17	1	211	24.3	7.02	High	High	High	High	High	High	1.655e+07	2.34059e+07	2.07166e+07	3.80381e+08	3.93779e+08	3.49728e+08
cbdbA610	High	Master Protein	Q3ZX27	Response regulator OS=Dehalococcoides mccartyi (strain CBDB1) GN=cbdbA610 PE=4 SV=1	FALSE	0	127.377	75	17	70	17	1	319	35.6	5.94	High	High	Not Found	High	Not Found	High	5.53853e+06	6.98098e+06		5.20983e+07		3.22928e+07
cbdbA999	High	Master Protein	Q3ZXY6	Uncharacterized protein OS=Dehalococcoides mccartyi (strain CBDB1) GN=cbdbA999 PE=4 SV=1	FALSE	0	127.201	66	16	208	16	1	244	27.3	5.72	High	High	High	High	High	High	1.73683e+07	2.14216e+07	4.82322e+07	4.11816e+08	5.59344e+08	3.33955e+08
cbdbA486	High	Master Protein	Q3ZZS9	Putative daunorubicin resistance ABC transporter, ATP-binding protein OS=Dehalococcoides mccartyi (strain CBDB1) GN=cbdbA486 PE=4 SV=1	FALSE	0	126.577	66	15	203	15	1	316	35	7.24	High	High	High	High	High	High	1.26082e+07	3.80104e+07	1.5665e+07	1.08531e+08	1.1197e+08	9.45868e+07
cbdbA1120	High	Master Protein	Q3ZYB5	GTP cyclohydrolase 1 OS=Dehalococcoides mccartyi (strain CBDB1) GN=folE PE=3 SV=1	FALSE	0	126.428	58	13	143	13	1	189	21.1	7.53	High	High	High	High	High	High	1.31405e+07	3.00661e+07	2.29542e+07	1.71199e+08	2.3678e+08	1.37802e+08
cbdbA429	High	Master Protein	Q3ZZN3	Shikimate dehydrogenase (NADP(+)) OS=Dehalococcoides mccartyi (strain CBDB1) GN=aroE PE=3 SV=1	FALSE	0	126.197	54	12	166	12	1	286	31.3	8.06	High	High	High	High	High	High	1.2378e+07	2.43295e+07	5.04362e+07	2.99569e+08	3.09607e+08	1.97613e+08
cbdbA1125	High	Master Protein	Q3ZYB1	Nucleotidyl transferase family protein OS=Dehalococcoides mccartyi (strain CBDB1) GN=cbdbA1125 PE=4 SV=1	FALSE	0	126.135	74	19	140	19	1	361	39.2	5.63	High	High	High	High	High	High	1.10336e+07	1.23524e+07	1.46582e+07	9.89214e+07	1.02037e+08	7.96054e+07
cbdbA1742	High	Master Protein	Q3ZZW0	Methionyl-tRNA formyltransferase OS=Dehalococcoides mccartyi (strain CBDB1) GN=fmt PE=3 SV=1	FALSE	0	126.073	67	16	161	16	1	312	34.1	6.6	High	High	High	High	High	High	1.45116e+07	2.60632e+07	2.31741e+07	1.68683e+08	3.03733e+08	1.45013e+08
cbdbA1278	High	Master Protein	Q3ZYM9	1-(5-phosphoribosyl)-5-[(5-phosphoribosylamino)methylideneamino] imidazole-4-carboxamide isomerase OS=Dehalococcoides mccartyi (strain CBDB1) GN=hisA PE=3 SV=1	FALSE	0	125.595	75	15	187	15	1	244	26.2	6.61	High	High	High	High	High	High	2.17369e+07	3.27268e+07	1.7173e+07	2.14545e+08	2.02e+08	1.66863e+08
cbdbA1272	High	Master Protein	Q3ZYN3	50S ribosomal protein L31 OS=Dehalococcoides mccartyi (strain CBDB1) GN=rpmE PE=3 SV=1	FALSE	0	125.212	81	10	189	10	1	68	7.7	9.25	High	High	High	High	High	High	5.22647e+07	5.40813e+07	1.23556e+07	3.56539e+08	4.51827e+08	2.33047e+08
cbdbA1217	High	Master Protein	Q3ZYI2	Serine protease, DegP OS=Dehalococcoides mccartyi (strain CBDB1) GN=cbdbA1217 PE=4 SV=1	FALSE	0	125.1	44	13	290	13	1	394	42.2	4.39	High	High	High	High	High	High	9.45358e+07	1.14103e+08	1.08109e+08	5.02311e+08	4.95927e+08	5.06975e+08
cbdbA1711	High	Master Protein	Q3ZW73	UPF0145 protein cbdbA1711 OS=Dehalococcoides mccartyi (strain CBDB1) GN=cbdbA1711 PE=3 SV=1	FALSE	0	124.184	98	11	304	11	1	104	11.3	7.34	High	High	High	High	High	High	1.99659e+07	2.15093e+07	4.49733e+07	2.65795e+08	4.63433e+08	2.84629e+08
cbdbA1610	High	Master Protein	Q3ZW18	Uncharacterized protein OS=Dehalococcoides mccartyi (strain CBDB1) GN=cbdbA1610 PE=4 SV=1	FALSE	0	123.679	86	11	261	11	1	145	15	8.68	High	High	High	High	High	High	1.00754e+08	1.38785e+08	1.65179e+08	8.6661e+08	1.06485e+09	6.99769e+08
cbdbA34	High	Master Protein	Q3ZW95	Universal stress family protein OS=Dehalococcoides mccartyi (strain CBDB1) GN=cbdbA34 PE=4 SV=1	FALSE	0	123.659	87	12	188	12	1	142	15.6	4.96	High	High	High	High	High	High	2.17674e+07	2.82155e+07	1.61413e+07	2.55116e+08	2.40027e+08	1.91166e+08
cbdbA625	High	Master Protein	Q3ZX17	Universal stress protein family OS=Dehalococcoides mccartyi (strain CBDB1) GN=cbdbA625 PE=4 SV=1	FALSE	0	123.331	69	13	130	13	1	287	31.9	5.55	High	High	High	High	High	High	3.07709e+07	4.65332e+07	2.12014e+07	3.23427e+08	2.5686e+08	1.81324e+08
cbdbA108	High	Master Protein	Q3ZWH9	Putative helicase (Snf2 family) OS=Dehalococcoides mccartyi (strain CBDB1) GN=cbdbA108 PE=4 SV=1	FALSE	0	123.33	29	24	120	24	1	1033	118.7	6.13	High	High	High	High	High	High	8.14919e+06	1.26442e+07	5.51014e+06	6.18055e+07	5.76861e+07	5.07958e+07
cbdbA1323	High	Master Protein	Q3ZYT4	NADPH-dependent FMN reductase OS=Dehalococcoides mccartyi (strain CBDB1) GN=cbdbA1323 PE=4 SV=1	FALSE	0	122.256	87	14	149	14	1	190	21	7.33	High	High	High	High	High	High	1.44114e+07	2.92024e+07	2.44185e+07	2.80351e+08	3.02107e+08	1.96671e+08
cbdbA1069	High	Master Protein	Q3ZY67	Cob(I)alamin adenosyltransferase OS=Dehalococcoides mccartyi (strain CBDB1) GN=cobA PE=4 SV=1	FALSE	0	122.093	79	15	156	15	1	182	20.2	6.34	High	High	High	High	High	High	9.92501e+06	1.00526e+07	3.12329e+06	1.72977e+08	1.66992e+08	1.13394e+08
cbdbA1	High	Master Protein	Q3ZW90	Chromosomal replication initiator protein DnaA OS=Dehalococcoides mccartyi (strain CBDB1) GN=dnaA PE=3 SV=1	FALSE	0	122.034	58	20	83	20	1	444	49.7	6.81	High	High	High	High	High	High	4.11757e+06	6.35182e+06	4.10706e+06	4.89501e+07	3.35882e+07	3.31541e+07
cbdbA109	High	Master Protein	Q3ZWH8	Uncharacterized protein OS=Dehalococcoides mccartyi (strain CBDB1) GN=cbdbA109 PE=4 SV=1	FALSE	0	121.691	30	23	121	23	1	1023	118.5	5.92	High	High	High	High	High	High	6.67074e+06	5.86506e+06	9.29009e+06	3.61487e+07	2.48358e+07	27462168
cbdbA452	High	Master Protein	Q3ZZL0	30S ribosomal protein S8 OS=Dehalococcoides mccartyi (strain CBDB1) GN=rpsH PE=3 SV=1	FALSE	0	121.253	73	10	278	10	1	131	14.4	10.11	High	High	High	High	High	High	7.70359e+07	7.98928e+07	9.38375e+07	4.28832e+08	1.196e+09	2.81455e+08
cbdbA1132	High	Master Protein	Q3ZYA5	Uncharacterized protein OS=Dehalococcoides mccartyi (strain CBDB1) GN=cbdbA1132 PE=4 SV=1	FALSE	0	121.143	59	12	303	12	1	88	9.3	10.07	High	High	High	High	High	High	6.06911e+07	7.61602e+07	4.4048e+07	2.21692e+08	1.7598e+08	1.70103e+08
cbdbA1370	High	Master Protein	Q3ZYU2	Putative transaldolase OS=Dehalococcoides mccartyi (strain CBDB1) GN=tal PE=3 SV=1	FALSE	0	120.608	71	12	222	12	1	216	23.4	6.54	High	High	High	High	High	High	1.06756e+08	1.09916e+08	6.09929e+07	5.72624e+08	6.69999e+08	4.39753e+08
cbdbA450	High	Master Protein	Q3ZZL3	50S ribosomal protein L24 OS=Dehalococcoides mccartyi (strain CBDB1) GN=rplX PE=3 SV=1	FALSE	0	119.271	59	12	475	12	1	103	11.5	10.01	High	High	High	High	High	High	2.35752e+08	2.49103e+08	1.98717e+08	7.1277e+08	7.44031e+08	4.74731e+08
cbdbA400	High	Master Protein	Q3ZZK4	Probable transcriptional regulatory protein cbdbA400 OS=Dehalococcoides mccartyi (strain CBDB1) GN=cbdbA400 PE=3 SV=1	FALSE	0	118.944	59	11	152	11	1	251	27.2	5.01	High	High	High	High	High	High	7.69694e+06	9.33006e+06	1.31257e+07	9.28276e+07	7.83133e+07	6.17099e+07
cbdbA1106	High	Master Protein	Q3ZY81	Hypothetical periplasmic protein OS=Dehalococcoides mccartyi (strain CBDB1) GN=cbdbA1106 PE=4 SV=1	FALSE	0	118.754	60	14	370	14	1	254	26.6	4.75	High	High	High	High	High	High	1.58905e+08	1.80374e+08	1.83767e+08	5.29799e+08	7.30933e+08	5.80226e+08
cbdbA1253	High	Master Protein	Q3ZYK3	Uncharacterized protein OS=Dehalococcoides mccartyi (strain CBDB1) GN=cbdbA1253 PE=4 SV=1	FALSE	0	118.397	62	16	138	16	1	385	41.8	5.24	High	High	High	High	High	High	1.2039e+07	1.55752e+07	1.45549e+07	2.981e+08	2.43963e+08	1.15558e+08
cbdbA1335	High	Master Protein	Q3ZYS4	GGDEF domain OS=Dehalococcoides mccartyi (strain CBDB1) GN=cbdbA1335 PE=4 SV=1	FALSE	0	118.353	31	19	82	19	1	792	89.4	6.61	High	High	High	High	High	High	2.98817e+06	2.00587e+06	2.70256e+06	7.18622e+07	2.80046e+07	3.11462e+07
cbdbA200	High	Master Protein	Q3ZWQ2	Pyrroline-5-carboxylate reductase OS=Dehalococcoides mccartyi (strain CBDB1) GN=proC PE=3 SV=1	FALSE	0	117.829	59	16	143	16	1	267	27.7	8.78	High	High	High	High	High	High	2.04879e+07	2.55634e+07	2.31612e+07	1.62147e+08	1.5956e+08	9.56576e+07
cbdbA397	High	Master Protein	Q3ZZK7	UvrABC system protein B OS=Dehalococcoides mccartyi (strain CBDB1) GN=uvrB PE=3 SV=1	FALSE	0	117.451	39	18	87	18	1	664	75.7	5.83	High	High	High	High	High	High	4.61741e+06	8.94699e+06	1.97036e+07	5.33763e+07	5.1139e+07	4.25937e+07
cbdbA1138	High	Master Protein	Q3ZY99	Uncharacterized protein OS=Dehalococcoides mccartyi (strain CBDB1) GN=cbdbA1138 PE=4 SV=1	FALSE	0	117.266	100	10	297	10	1	72	8.1	4.83	High	High	High	High	High	High	3.26109e+07	3.51054e+07	2.40182e+07	4.89922e+08	4.17722e+08	3.77723e+08
cbdbA1057	High	Master Protein	Q3ZY29	Imidazole glycerol phosphate synthase subunit HisF OS=Dehalococcoides mccartyi (strain CBDB1) GN=hisF PE=3 SV=1	FALSE	0	117.195	82	21	169	21	1	253	27.2	5.8	High	High	High	High	High	High	3.1715e+07	3.55666e+07	2.38987e+07	1.46343e+08	1.43995e+08	1.53332e+08
cbdbA1158	High	Master Protein	Q3ZYD1	Formyltetrahydrofolate deformylase OS=Dehalococcoides mccartyi (strain CBDB1) GN=purU PE=4 SV=1	FALSE	0	116.597	73	15	107	15	1	284	32.8	6.54	High	High	High	High	High	High	6.97954e+06	1.16478e+07	4.47235e+06	1.67782e+08	1.22693e+08	1.27399e+08
cbdbA922	High	Master Protein	Q3ZXW2	Single-stranded-DNA-specific exonuclease RecJ OS=Dehalococcoides mccartyi (strain CBDB1) GN=recJ PE=4 SV=1	FALSE	0	116.292	36	15	104	15	1	566	62.5	5.95	High	High	High	High	High	High	1.31524e+07	2.24497e+07	1.27136e+07	8.81419e+07	6.02068e+07	7.7223e+07
cbdbA1402	High	Master Protein	Q3ZYW1	Hydrogenase expression/formation protein HypE OS=Dehalococcoides mccartyi (strain CBDB1) GN=hypE PE=4 SV=1	FALSE	0	115.647	45	12	157	12	1	335	35.1	5.2	High	High	High	High	High	High	2.00839e+07	2.52948e+07	1.32973e+07	2.78061e+08	2.7975e+08	1.46574e+08
cbdbA353	High	Master Protein	Q3ZZE8	SAM-dependent methyltransferase UbiE/COQ5 family OS=Dehalococcoides mccartyi (strain CBDB1) GN=cbdbA353 PE=4 SV=1	FALSE	0	115.309	75	15	128	15	1	200	23.1	7.88	High	High	High	High	High	High	2.23062e+07	4.19138e+07	2.70065e+07	2.25461e+08	2.64104e+08	2.10658e+08
cbdbA1695	High	Master Protein	Q3ZW47	Sec-independent protein translocase protein TatA OS=Dehalococcoides mccartyi (strain CBDB1) GN=tatA PE=3 SV=1	FALSE	0	115.273	54	7	233	7	1	65	7	5.4	High	High	High	High	High	High	1.08542e+08	1.19438e+08	1.04173e+08	1.93417e+09	1.88348e+09	1.74228e+09
cbdbA9	High	Master Protein	Q3ZWB5	Uncharacterized protein OS=Dehalococcoides mccartyi (strain CBDB1) GN=cbdbA9 PE=4 SV=1	FALSE	0	114.834	50	19	188	19	1	387	43.8	9.19	High	High	High	High	High	High	2.5455e+07	2.96768e+07	2.44967e+07	1.49414e+08	1.44254e+08	1.28623e+08
cbdbA1614	High	Master Protein	Q3ZW14	Putative integral membrane efflux protein OS=Dehalococcoides mccartyi (strain CBDB1) GN=cbdbA1614 PE=4 SV=1	FALSE	0	114.299	19	13	146	13	1	1004	105.1	5.05	High	High	High	High	High	High	2.24455e+07	2.31987e+07	1.60867e+07	1.32765e+08	1.12355e+08	4.84207e+07
cbdbA1389	High	Master Protein	Q3ZYX1	Probable hemolysin-related protein OS=Dehalococcoides mccartyi (strain CBDB1) GN=cbdbA1389 PE=4 SV=1	FALSE	0	113.346	29	12	146	12	1	424	46.9	5.05	High	High	High	High	High	High	3.93828e+07	4.17209e+07	2.02444e+07	3.21734e+08	2.10505e+08	2.49059e+08
cbdbA1382	High	Master Protein	Q3ZYX8	Putative nicotinate-nucleotide pyrophosphorylase OS=Dehalococcoides mccartyi (strain CBDB1) GN=pncB PE=4 SV=1	FALSE	0	113.041	55	11	187	11	1	333	35.9	6.33	High	High	High	High	High	High	2.32675e+07	5.47179e+07	3.45275e+07	2.003e+08	1.95242e+08	1.96647e+08
cbdbA1232	High	Master Protein	Q3ZYH4	Sensor histidine kinase OS=Dehalococcoides mccartyi (strain CBDB1) GN=cbdbA1232 PE=4 SV=1	FALSE	0	112.597	39	14	116	14	1	394	45.1	6.4	High	High	High	High	High	High	1.32779e+07	1.88101e+07	1.37259e+07	1.55923e+08	1.21119e+08	1.22568e+08
cbdbA176	High	Master Protein	Q3ZWM5	Uncharacterized protein OS=Dehalococcoides mccartyi (strain CBDB1) GN=cbdbA176 PE=4 SV=1	FALSE	0	112.55	81	7	229	7	1	86	9.7	5.02	High	High	High	High	High	High	1.34248e+08	1.25324e+08	1.31433e+08	5.33496e+08	5.51231e+08	5.39037e+08
cbdbA496	High	Master Protein	Q3ZZS2	TldD OS=Dehalococcoides mccartyi (strain CBDB1) GN=cbdbA496 PE=4 SV=1	FALSE	0	112.439	41	13	178	13	1	458	50.5	6.67	High	High	High	High	High	High	8.89295e+06	1.56185e+07	1.59507e+07	1.64926e+08	1.51387e+08	1.538e+08
cbdbA470	High	Master Protein	Q3ZZP2	30S ribosomal protein S9 OS=Dehalococcoides mccartyi (strain CBDB1) GN=rpsI PE=3 SV=1	FALSE	0	111.728	70	10	408	10	1	132	14.5	10.73	High	High	High	High	High	High	1.76776e+08	2.81153e+08	2.18697e+07	1.02795e+09	1.89142e+09	1.20412e+09
cbdbA759	High	Master Protein	Q3ZXD3	Translin family protein OS=Dehalococcoides mccartyi (strain CBDB1) GN=cbdbA759 PE=4 SV=1	FALSE	0	111.597	59	14	184	14	1	210	23.6	4.97	High	High	High	High	High	High	3.63841e+07	4.60281e+07	4.19147e+07	1.0674e+08	1.04903e+08	1.15663e+08
cbdbA1638	High	Master Protein	Q3ZW45	Putative reductive dehalogenase OS=Dehalococcoides mccartyi (strain CBDB1) GN=rdhA PE=4 SV=1	FALSE	0	111.434	51	16	146	16	1	500	54.8	6.4	High	High	High	High	High	High	2.05636e+06	1.00696e+07	2.39393e+07	6.75982e+07	7.96194e+07	6.5159e+07
cbdbA380	High	Master Protein	Q3ZZH2	Carbohydrate kinase, yjeF-family OS=Dehalococcoides mccartyi (strain CBDB1) GN=cbdbA380 PE=3 SV=1	FALSE	0	111.036	45	16	163	16	1	512	53.3	5.16	High	High	High	High	High	High	7.65346e+06	1.51041e+07	1.01405e+07	1.02099e+08	9.3041e+07	7.93592e+07
cbdbA446	High	Master Protein	Q3ZZL7	50S ribosomal protein L16 OS=Dehalococcoides mccartyi (strain CBDB1) GN=rplP PE=3 SV=1	FALSE	0	110.917	70	14	241	14	1	149	16.7	10.74	High	High	High	High	High	High	8.62183e+07	8.55414e+07	7.4971e+07	7.28631e+08	8.53758e+08	4.74094e+08
cbdbA1354	High	Master Protein	Q3ZYV5	GTPase Der OS=Dehalococcoides mccartyi (strain CBDB1) GN=engA PE=3 SV=1	FALSE	0	110.796	44	18	125	18	1	442	48.7	6.74	High	High	High	High	High	High	5.46589e+06	1.06323e+07	2.02057e+07	9.14906e+07	1.54236e+08	8.38299e+07
cbdbA824	High	Master Protein	Q3ZXL9	Imidazoleglycerol-phosphate dehydratase OS=Dehalococcoides mccartyi (strain CBDB1) GN=hisB PE=3 SV=1	FALSE	0	110.355	60	11	200	11	1	196	21.3	6.54	High	High	High	High	High	High	1.93782e+07	3.67031e+07	5.56076e+07	2.01664e+08	295493228	1.63337e+08
cbdbA472	High	Master Protein	Q3ZZP0	SIS domain protein OS=Dehalococcoides mccartyi (strain CBDB1) GN=cbdbA472 PE=4 SV=1	FALSE	0	109.77	40	12	76	12	1	355	39.6	6.86	High	High	High	High	High	High	8.61248e+06	1.08727e+07	8.81148e+06	4.41696e+07	4.84802e+07	6.32661e+07
cbdbA15	High	Master Protein	Q3ZWA9	Uncharacterized protein OS=Dehalococcoides mccartyi (strain CBDB1) GN=cbdbA15 PE=4 SV=1	FALSE	0	109.456	65	16	139	16	1	231	25.4	5.86	High	High	High	High	High	High	1.45987e+07	2.13465e+07	2.15306e+07	1.64217e+08	2.17175e+08	1.62039e+08
cbdbA368.1	High	Master Protein	Q3ZZI3	Uncharacterized protein OS=Dehalococcoides mccartyi (strain CBDB1) GN=cbdbA368.1 PE=4 SV=1	FALSE	0	109.274	66	7	578	7	1	95	10.7	7.5	High	High	High	High	High	High	9.14059e+07	7.98331e+07	1.76572e+07	2.76689e+09	2.07588e+09	1.33361e+09
cbdbA323	High	Master Protein	Q3ZZC0	Phosphoribosylformylglycinamidine synthase subunit PurQ OS=Dehalococcoides mccartyi (strain CBDB1) GN=purQ PE=4 SV=1	FALSE	0	108.148	57	15	79	15	1	255	27.8	8.4	Not Found	High	High	High	High	High		1.30332e+07	1.10756e+07	6.26024e+07	7.55731e+07	4.05342e+07
cbdbA911	High	Master Protein	Q3ZXT0	Bacterioferritin domain protein OS=Dehalococcoides mccartyi (strain CBDB1) GN=cbdbA911 PE=4 SV=1	FALSE	0	108.085	56	12	83	12	1	275	32	5.57	Not Found	High	Not Found	High	High	High		7.3841e+06		4.26802e+07	8.50091e+07	4.94332e+07
cbdbA1110	High	Master Protein	Q3ZY77	DNA mismatch repair protein MutL OS=Dehalococcoides mccartyi (strain CBDB1) GN=mutL PE=3 SV=1	FALSE	0	107.868	43	22	106	22	1	566	62.2	7.17	High	High	High	High	High	High	112528	7.5667e+06	7.98875e+06	4.6335e+07	6.27048e+07	3.79394e+07
cbdbA982	High	Master Protein	Q3ZXZ8	Uncharacterized protein OS=Dehalococcoides mccartyi (strain CBDB1) GN=cbdbA982 PE=4 SV=1	FALSE	0	107.666	94	12	332	12	1	78	8.8	6.52	High	High	High	High	High	High	5.06117e+08	4.79072e+08	1.48993e+08	3.00676e+09	2.34584e+09	2.25482e+09
cbdbA320	High	Master Protein	Q3ZZC2	Elongation factor Ts OS=Dehalococcoides mccartyi (strain CBDB1) GN=tsf PE=3 SV=1	FALSE	0	107.45	52	11	427	11	1	167	18.4	5.29	High	High	High	High	High	High	4.19347e+08	4.26918e+08	4.33577e+08	2.70107e+09	2.53666e+09	2.02398e+09
cbdbA219	High	Master Protein	Q3ZWT8	L-lysine 2,3-aminomutase homologe, probable frameshift OS=Dehalococcoides mccartyi (strain CBDB1) GN=kamA PE=4 SV=1	FALSE	0	107.24	31	16	58	16	1	708	79.8	8.12	High	High	Not Found	High	High	High	4.408e+06	5.88677e+06		3.9371e+07	2.98278e+07	2.54434e+07
cbdbA931	High	Master Protein	Q3ZXV7	30S ribosomal protein S15 OS=Dehalococcoides mccartyi (strain CBDB1) GN=rpsO PE=3 SV=1	FALSE	0	107.033	84	12	263	12	1	87	10	10.27	High	High	High	High	High	High	1.4291e+08	1.83477e+08	9.61422e+07	6.54709e+08	9.53903e+08	4.34273e+08
cbdbA670	High	Master Protein	Q3ZX78	Elongation factor P OS=Dehalococcoides mccartyi (strain CBDB1) GN=efp PE=3 SV=1	FALSE	0	106.568	53	9	87	9	1	186	21	6.04	High	High	High	High	High	High	7.94821e+06	2.98017e+06	1.5779e+07	2.52978e+07	4.6808e+07	2.23499e+07
cbdbA1206	High	Master Protein	Q3ZYI9	N utilization substance protein B homolog OS=Dehalococcoides mccartyi (strain CBDB1) GN=nusB PE=3 SV=1	FALSE	0	106.498	84	13	137	13	1	143	16.2	5.36	High	High	High	High	High	High	2.53471e+07	4.64607e+07	3.21754e+07	3.95021e+08	3.63494e+08	2.3446e+08
cbdbA368	High	Master Protein	Q3ZZG0	Deoxyuridine 5'-triphosphatenucleotidohydrolase OS=Dehalococcoides mccartyi (strain CBDB1) GN=dut PE=4 SV=1	FALSE	0	106.109	85	12	191	12	1	170	18.9	7.14	High	High	High	High	High	High	3.20619e+07	3.94016e+07	3.49278e+07	1.89751e+08	1.95641e+08	1.82806e+08
cbdbA1270	High	Master Protein	Q3ZYN5	50S ribosomal protein L21 OS=Dehalococcoides mccartyi (strain CBDB1) GN=rplU PE=3 SV=1	FALSE	0	105.683	67	8	152	8	1	132	14.1	9.31	High	High	High	High	High	High	8.57306e+06	2.98383e+07	2.85676e+07	1.14872e+08	7.34139e+07	1.79504e+08
cbdbA371	High	Master Protein	Q3ZZI0	Amino acid ABC transporter, periplasmic aminoacid-binding protein OS=Dehalococcoides mccartyi (strain CBDB1) GN=cbdbA371 PE=4 SV=1	FALSE	0	105.371	45	10	247	10	1	257	27.9	4.67	High	High	High	High	High	High	1.00345e+08	1.12205e+08	9.13993e+07	4.84329e+08	4.18031e+08	3.90247e+08
cbdbA562	High	Master Protein	Q3ZWX2	Nucleoid-associated protein cbdbA562 OS=Dehalococcoides mccartyi (strain CBDB1) GN=cbdbA562 PE=3 SV=1	FALSE	0	105.157	69	10	269	10	1	99	10.9	9.31	High	High	High	High	High	High	1.05391e+08	2.09435e+08	2.89672e+08	1.1275e+09	1.36481e+09	9.71849e+08
cbdbA1303	High	Master Protein	Q3ZYQ6	Pilin biogenesis protein OS=Dehalococcoides mccartyi (strain CBDB1) GN=pilC PE=3 SV=1	FALSE	0	104.757	35	13	160	13	1	401	43.8	8.95	High	High	High	High	High	High	3.92205e+07	2.44313e+07	2.27999e+07	8.53046e+07	5.90429e+07	8.20059e+07
cbdbA274	High	Master Protein	Q3ZWU2	Protein translocase subunit SecD OS=Dehalococcoides mccartyi (strain CBDB1) GN=secD PE=3 SV=1	FALSE	0	104.279	27	12	238	12	1	449	48.2	4.97	High	High	High	High	High	High	7.76138e+07	8.8838e+07	3.94521e+07	4.43045e+08	3.33941e+08	5.20663e+08
cbdbA226	High	Master Protein	Q3ZWT5	ABC transporter, ATP-binding protein OS=Dehalococcoides mccartyi (strain CBDB1) GN=cbdbA226 PE=3 SV=1	FALSE	0	103.937	34	18	87	18	1	663	74.7	7.8	High	High	High	High	High	High	3.73675e+06	3.32672e+06	2.27808e+06	4.72802e+07	3.99671e+07	3.46828e+07
cbdbA167	High	Master Protein	Q3ZWN3	Phosphate-specific transport system accessory protein PhoU OS=Dehalococcoides mccartyi (strain CBDB1) GN=phoU PE=3 SV=1	FALSE	0	103.927	64	12	180	12	1	221	25	5.11	High	High	High	High	High	High	2.17523e+07	3.16883e+07	1.17626e+07	1.48741e+08	1.49332e+08	1.28128e+08
cbdbA560	High	Master Protein	Q3ZWX4	Magnesium and cobalt transport protein CorA OS=Dehalococcoides mccartyi (strain CBDB1) GN=corA PE=4 SV=1	FALSE	0	103.66	38	11	118	11	1	354	40.7	6.57	High	High	High	High	High	High	7.70812e+06	1.34678e+07	1.91257e+07	1.32351e+08	8.01945e+07	1.11341e+08
cbdbA647	High	Master Protein	Q3ZX48	DNA-binding response regulator, LuxR family OS=Dehalococcoides mccartyi (strain CBDB1) GN=cbdbA647 PE=4 SV=1	FALSE	0	103.655	60	18	151	18	1	224	24.8	5.99	High	High	High	High	High	High	1.57059e+07	2.30844e+07	1.94645e+07	1.73758e+08	1.88857e+08	1.15514e+08
cbdbA1113	High	Master Protein	Q3ZY97	Aspartate carbamoyltransferase OS=Dehalococcoides mccartyi (strain CBDB1) GN=pyrB PE=3 SV=1	FALSE	0	103.446	60	15	124	15	1	331	36.3	6.96	High	High	High	High	High	High	1.56001e+07	1.79737e+07	2.17203e+07	1.23356e+08	1.42694e+08	7.72184e+07
cbdbA1444	High	Master Protein	Q3ZZ15	Anthranilate phosphoribosyltransferase OS=Dehalococcoides mccartyi (strain CBDB1) GN=trpD PE=3 SV=1	FALSE	0	103.327	37	11	119	11	1	341	35.7	6.1	High	High	High	High	High	High	1.16033e+07	1.23403e+07	1.99454e+07	1.52633e+08	1.28138e+08	1.1857e+08
cbdbA1019	High	Master Protein	Q3ZY13	Single-stranded DNA-binding protein OS=Dehalococcoides mccartyi (strain CBDB1) GN=ssb PE=4 SV=1	FALSE	0	102.981	90	14	411	14	1	135	15.3	5.33	High	High	High	High	High	High	1.51781e+08	1.85911e+08	2.27802e+08	9.33584e+08	1.123e+09	795993034
cbdbA72	High	Master Protein	Q3ZWB8	DNA repair protein radA OS=Dehalococcoides mccartyi (strain CBDB1) GN=radA PE=3 SV=1	FALSE	0	102.981	41	16	87	16	1	464	49.4	6.58	High	High	High	High	High	High	8.45672e+06	7.75581e+06	9.74093e+06	8.67214e+07	3.89392e+07	2.87595e+07
cbdbA268	High	Master Protein	Q3ZWU7	Uncharacterized protein OS=Dehalococcoides mccartyi (strain CBDB1) GN=cbdbA268 PE=4 SV=1	FALSE	0	102.658	59	15	105	15	1	401	44.9	6.47	High	High	High	High	High	High	1.54379e+07	2.06547e+07	17920126	9.60978e+07	1.12046e+08	1.06071e+08
cbdbA751	High	Master Protein	Q3ZXD9	Single-stranded nucleic acid binding R3H domain protein OS=Dehalococcoides mccartyi (strain CBDB1) GN=cbdbA751 PE=4 SV=1	FALSE	0	102.618	43	17	79	17	1	509	56.8	6.99	High	High	High	High	High	High		8.36129e+06	2.84966e+06	6.12893e+07	8.38544e+07	4.1363e+07
cbdbA985	High	Master Protein	Q3ZXZ6	ACT domain protein OS=Dehalococcoides mccartyi (strain CBDB1) GN=cbdbA985 PE=4 SV=1	FALSE	0	102.475	81	9	261	9	1	129	14.1	5.11	High	High	High	High	High	High	4.42853e+07	4.76364e+07	1.33e+08	5.58572e+08	5.90158e+08	4.39211e+08
cbdbA415	High	Master Protein	Q3ZZJ3	HIT domain protein OS=Dehalococcoides mccartyi (strain CBDB1) GN=cbdbA415 PE=4 SV=1	FALSE	0	102.419	76	10	158	10	1	113	12.3	6.37	High	High	High	High	High	High	2.04233e+07	1.57532e+07	2.24309e+07	2.07224e+08	2.64062e+08	2.23823e+08
cbdbA669	High	Master Protein	Q3ZX79	PHP domain protein OS=Dehalococcoides mccartyi (strain CBDB1) GN=cbdbA669 PE=4 SV=1	FALSE	0	101.879	64	10	119	10	1	219	24.2	8.51	High	High	High	High	High	High	2.63368e+07	2.89135e+07	1.21277e+07	1.03446e+08	1.25031e+08	8.03643e+07
cbdbA314	High	Master Protein	Q3ZZC7	1-deoxy-D-xylulose 5-phosphate reductoisomerase OS=Dehalococcoides mccartyi (strain CBDB1) GN=dxr PE=3 SV=1	FALSE	0	101.696	67	17	115	17	1	377	40.9	6.54	High	High	Not Found	High	High	High	9.42815e+06	1.35761e+07		8.65928e+07	6.31987e+07	6.34587e+07
cbdbA344	High	Master Protein	Q3ZZF5	Glycoprotease family protein OS=Dehalococcoides mccartyi (strain CBDB1) GN=cbdbA344 PE=4 SV=1	FALSE	0	101.452	50	15	72	15	1	456	49.2	6.35	High	High	High	High	High	High	6.36734e+06	1.55004e+07	6.71563e+06	4.78201e+07	6.37261e+07	3.39786e+07
cbdbA1348	High	Master Protein	Q3ZYR5	DNA-directed DNA polymerase I OS=Dehalococcoides mccartyi (strain CBDB1) GN=polA PE=3 SV=1	FALSE	0	101.145	27	17	49	17	1	903	99.9	5.92	Not Found	High	High	High	High	High		5.94005e+06	3.26214e+06	1.71876e+07	1.72516e+07	2.04267e+07
cbdbA122	High	Master Protein	Q3ZWH0	Mrp family protein OS=Dehalococcoides mccartyi (strain CBDB1) GN=cbdbA122 PE=4 SV=1	FALSE	0	101.107	42	12	160	12	1	328	35.1	5.41	High	High	High	High	High	High	1.44769e+07	1.71e+07	1.42208e+07	1.80297e+08	1.84619e+08	1.45827e+08
cbdbA754	High	Master Protein	Q3ZXD7	tRNA-specific 2-thiouridylase MnmA OS=Dehalococcoides mccartyi (strain CBDB1) GN=mnmA PE=3 SV=1	FALSE	0	101.064	49	13	117	13	1	357	39.1	6.7	High	High	High	High	High	High	1.17022e+07	1.11947e+07	1.63993e+07	8.96856e+07	8.86706e+07	7.6119e+07
cbdbA691	High	Master Protein	Q3ZXA3	GTPase HflX OS=Dehalococcoides mccartyi (strain CBDB1) GN=hflX PE=3 SV=1	FALSE	0	101.032	47	16	106	16	1	382	42.8	6.81	High	Not Found	High	High	High	High	6.37723e+06		1.98192e+07	6.9957e+07	9.23049e+07	6.14311e+07
cbdbA1021	High	Master Protein	Q3ZY11	Conserved domain protein OS=Dehalococcoides mccartyi (strain CBDB1) GN=cbdbA1021 PE=4 SV=1	FALSE	0	100.665	90	10	317	10	1	80	8.9	6.77	High	High	High	High	High	High	1.29905e+08	1.41255e+08	1.22639e+08	6.20098e+08	6.38677e+08	5.27154e+08
cbdbA417	High	Master Protein	Q3ZZJ1	Acetyltransferase, GNAT family OS=Dehalococcoides mccartyi (strain CBDB1) GN=cbdbA417 PE=4 SV=1	FALSE	0	100.566	69	11	104	11	1	158	17.8	6.52	High	High	High	High	High	High	2.34413e+07	2.24072e+07	3.12868e+07	1.41379e+08	2.50695e+08	1.4446e+08
cbdbA83	High	Master Protein	Q3ZWF6	DNA-binding response regulator OS=Dehalococcoides mccartyi (strain CBDB1) GN=rdhD PE=4 SV=1	FALSE	0	100.436	64	13	101	13	1	233	26.5	8.78	High	High	High	High	High	High	7.66541e+06	8.36715e+06	1.6473e+07	1.86174e+08	1.98055e+08	9.75865e+07
cbdbA1457	High	Master Protein	Q3ZZ04	Thymidylate synthase ThyX OS=Dehalococcoides mccartyi (strain CBDB1) GN=thyX PE=3 SV=1	FALSE	0	98.475	84	14	131	14	1	195	22.2	7.46	High	High	High	High	High	High	1.53015e+07	2.13241e+07	1.62931e+07	1.76076e+08	2.18077e+08	1.74205e+08
cbdbA423	High	Master Protein	Q3ZZI8	Prephenate dehydrogenase OS=Dehalococcoides mccartyi (strain CBDB1) GN=cbdbA423 PE=4 SV=1	FALSE	0	98.317	64	13	100	13	1	288	31.9	7.17	High	High	High	High	High	High	6.56476e+06	4.38411e+06	5.94288e+06	3.35638e+08	2.80849e+08	1.42877e+08
cbdbA666	High	Master Protein	Q3ZX82	ATP-dependent Clp protease proteolytic subunit OS=Dehalococcoides mccartyi (strain CBDB1) GN=clpP PE=3 SV=1	FALSE	0	97.439	46	6	154	6	1	200	22	5.82	High	High	High	High	High	High	8.02169e+06	1.12856e+07	3.15748e+06	2.67761e+08	3.55976e+08	1.56358e+08
cbdbA820	High	Master Protein	Q3ZXM2	N5-carboxyaminoimidazole ribonucleotide mutase OS=Dehalococcoides mccartyi (strain CBDB1) GN=purE PE=3 SV=1	FALSE	0	97.188	72	11	144	11	1	154	16.3	5.94	High	High	High	High	High	High	1.40797e+07	1.8701e+07	3.30421e+07	2.33966e+08	2.68682e+08	1.94041e+08
cbdbA527	High	Master Protein	Q3ZZU8	DNA primase OS=Dehalococcoides mccartyi (strain CBDB1) GN=dnaG PE=3 SV=1	FALSE	0	97.03	35	17	132	17	1	588	67	6.33	High	High	High	High	High	High	2.89673e+06	7.69896e+06	3.53298e+06	4.71448e+07	4.21632e+07	3.68095e+07
cbdbA1004	High	Master Protein	Q3ZY25	DegV family protein OS=Dehalococcoides mccartyi (strain CBDB1) GN=cbdbA1004 PE=4 SV=1	FALSE	0	96.953	60	13	102	13	1	285	31	6.93	High	High	High	High	High	High	1.10167e+07	1.1385e+07	2.07614e+07	1.02091e+08	1.12353e+08	9.24445e+07
cbdbA136	High	Master Protein	Q3ZWL0	ABC transporter, ATP-binding protein OS=Dehalococcoides mccartyi (strain CBDB1) GN=cbdbA136 PE=3 SV=1	FALSE	0	96.47	51	10	77	10	1	288	32	6.4	High	High	Not Found	High	High	High	7.67363e+06	1.11687e+07		7.64182e+07	9.6099e+07	4.31331e+07
cbdbA1738	High	Master Protein	Q3ZZW3	30S ribosomal protein S20 OS=Dehalococcoides mccartyi (strain CBDB1) GN=rpsT PE=3 SV=1	FALSE	0	96.351	39	6	284	6	1	88	9.6	10.7	High	High	High	High	High	High	1.29335e+07	2.70125e+07	2.15014e+07	4.771e+08	7.80503e+08	7.96894e+08
cbdbA267	High	Master Protein	Q3ZWU8	Uncharacterized protein OS=Dehalococcoides mccartyi (strain CBDB1) GN=cbdbA267 PE=4 SV=1	FALSE	0	96.289	91	11	183	11	1	199	21.7	6.52	High	High	High	High	High	High	1.58646e+07	3.08954e+07	1.41472e+07	2.38162e+08	2.00445e+08	1.62322e+08
cbdbB26	High	Master Protein	Q3ZYH0	Uncharacterized protein OS=Dehalococcoides mccartyi (strain CBDB1) GN=cbdbA1236 PE=4 SV=1	FALSE	0	95.689	84	8	712	8	1	106	11.6	8.5	High	High	High	High	High	High	7.48187e+08	5.64225e+08	4.87386e+08	4.31066e+09	4.86284e+09	4.68816e+09
cbdbA1710	High	Master Protein	Q3ZW74	Transcriptional regulator, AbrB family OS=Dehalococcoides mccartyi (strain CBDB1) GN=cbdbA1710 PE=4 SV=1	FALSE	0	95.571	90	8	118	8	1	90	10	9.47	High	High	High	High	High	High	2.99879e+07	1.93412e+07	2.21876e+07	7.85423e+07	1.32996e+08	9.71416e+07
cbdbA834	High	Master Protein	Q3ZXL0	ABC transproter, ATP-binding protein OS=Dehalococcoides mccartyi (strain CBDB1) GN=cbdbA834 PE=4 SV=1	FALSE	0	95.055	55	12	79	12	1	298	33	6.73	High	High	High	High	High	High	4.70059e+06	9.71209e+06	2.53408e+06	6.47073e+07	6.18053e+07	6.46051e+07
cbdbA1601	High	Master Protein	Q3ZVX6	Sensor histidine kinase/response regulator OS=Dehalococcoides mccartyi (strain CBDB1) GN=rdhCD PE=4 SV=1	FALSE	0	94.432	20	22	110	21	1	1434	162.4	6.16	High	High	High	High	High	High	5.22541e+06	8.09691e+06	1.17055e+07	3.07186e+07	3.4066e+07	3.40248e+07
cbdbA32	High	Master Protein	Q3ZW97	Putative potassium uptake protein, TrkA homolog OS=Dehalococcoides mccartyi (strain CBDB1) GN=cbdbA32 PE=4 SV=1	FALSE	0	94.173	74	13	172	13	1	221	24.1	5.76	High	High	High	High	High	High	1.31524e+07	3.86903e+07	2.48265e+07	1.71544e+08	9.56898e+07	1.20742e+08
cbdbA1164	High	Master Protein	Q3ZYC6	Putative iron-sulfur flavoprotein OS=Dehalococcoides mccartyi (strain CBDB1) GN=cbdbA1164 PE=4 SV=1	FALSE	0	93.898	53	12	157	12	1	190	20.7	8.91	High	High	High	High	High	High	2.04518e+07	2.3879e+07	3.48711e+07	1.59972e+08	1.8647e+08	1.26833e+08
cbdbA628	High	Master Protein	Q3ZX14	Putative ribose-5-phosphate isomerase OS=Dehalococcoides mccartyi (strain CBDB1) GN=rpiB PE=4 SV=1	FALSE	0	93.758	67	8	122	8	1	152	16.3	7.4	High	High	High	High	High	High	1.29016e+07	1.02573e+07	1.10952e+07	1.25746e+08	1.41013e+08	6.57827e+07
cbdbA416	High	Master Protein	Q3ZZJ2	MutT OS=Dehalococcoides mccartyi (strain CBDB1) GN=cbdbA416 PE=4 SV=1	FALSE	0	93.726	63	11	187	11	1	176	19.6	5	High	High	High	High	High	High	3.22707e+07	4.34517e+07	2.7974e+07	1.91322e+08	1.31375e+08	2.10502e+08
cbdbA584	High	Master Protein	Q3ZX02	Riboflavin biosynthesis protein RibF OS=Dehalococcoides mccartyi (strain CBDB1) GN=ribF PE=4 SV=1	FALSE	0	93.306	50	14	136	14	1	305	33.7	6.86	High	High	High	High	High	High	1.32675e+07	1.52977e+07	1.87032e+07	2.4131e+08	2.50793e+08	1.94721e+08
cbdbA1086	High	Master Protein	Q3ZY52	ABC transporter, ATP-binding/permease protein OS=Dehalococcoides mccartyi (strain CBDB1) GN=cbdbA1086 PE=3 SV=1	FALSE	0	92.941	28	15	106	15	1	741	81.6	5.58	High	High	Not Found	High	High	High	1.87145e+06	1.28715e+06		4.53684e+07	2.7754e+07	2.51168e+07
cbdbA189	High	Master Protein	Q3ZWR1	ATP-dependent RNA helicase, DEAD OS=Dehalococcoides mccartyi (strain CBDB1) GN=cbdbA189 PE=3 SV=1	FALSE	0	92.193	48	19	97	19	1	561	62.3	9.8	High	Not Found	Not Found	High	High	High	3.27095e+06			3.41307e+07	8.67954e+06	1.51281e+07
cbdbA528	High	Master Protein	Q3ZZU7	Putative deoxyguanosinetriphosphate triphosphohydrolase OS=Dehalococcoides mccartyi (strain CBDB1) GN=cbdbA528 PE=4 SV=1	FALSE	0	91.889	58	14	88	14	1	345	39.1	7.46	High	High	High	High	High	High	3.90833e+06	1.70199e+07	6.12543e+06	5.60447e+07	8.30673e+07	7.7503e+07
cbdbA1596	High	Master Protein	Q3ZVY0	Transcriptional regulator, MarR family OS=Dehalococcoides mccartyi (strain CBDB1) GN=rdhR PE=4 SV=1	FALSE	0	91.828	68	13	139	13	1	171	19.7	8.85	High	High	High	High	High	High	3.57038e+07	4.68291e+07	5.4023e+07	1.61211e+08	1.71663e+08	1.40072e+08
cbdbA37	High	Master Protein	Q3ZW93	Putative potassium uptake protein, TrkA homologe OS=Dehalococcoides mccartyi (strain CBDB1) GN=cbdbA37 PE=4 SV=1	FALSE	0	90.821	43	13	144	13	1	454	49.2	4.92	High	High	High	High	High	High	1.88141e+07	2.50062e+07	1.95842e+07	1.17823e+08	9.41756e+07	4.42306e+07
cbdbA1193	High	Master Protein	Q3ZYF3	DegV family protein OS=Dehalococcoides mccartyi (strain CBDB1) GN=cbdbA1193 PE=4 SV=1	FALSE	0	90.738	56	14	79	14	1	310	33.5	8.66	High	High	High	High	High	High	4.78571e+06	5.77772e+06	1.65098e+07	4.29569e+07	7.97973e+07	6.39091e+07
cbdbA1591	High	Master Protein	Q3ZVY4	Sensor histidine kinase/response regulator OS=Dehalococcoides mccartyi (strain CBDB1) GN=cbdbA1591 PE=4 SV=1	FALSE	0	90.626	21	18	59	17	1	1092	122.2	6.49	High	High	High	High	High	High	7.76208e+06	1959391	9.57156e+06	1.6843e+07	1.86565e+07	4.9923e+06
cbdbA332	High	Master Protein	Q3ZZB3	Uncharacterized protein OS=Dehalococcoides mccartyi (strain CBDB1) GN=cbdbA332 PE=4 SV=1	FALSE	0	90.476	89	8	165	8	1	71	8	6.01	High	High	High	High	High	High	2.0731e+07	7.69435e+06	1.13524e+06	2.30356e+08	1.25248e+08	1.17547e+08
cbdbA281	High	Master Protein	Q3ZZA4	Ribosomal RNA small subunit methyltransferase H OS=Dehalococcoides mccartyi (strain CBDB1) GN=rsmH PE=3 SV=1	FALSE	0	90.05	52	14	97	14	1	349	38.7	6.54	High	High	High	High	High	High	2.08075e+07	2.72221e+07	3.32004e+07	4.74563e+07	2.93973e+07	9.30226e+07
cbdbA460	High	Master Protein	Q3ZZQ2	Methionine aminopeptidase OS=Dehalococcoides mccartyi (strain CBDB1) GN=map PE=3 SV=1	FALSE	0	89.362	48	13	81	13	1	251	26.9	5.64	High	Not Found	High	High	High	High	6.93404e+06		1.95764e+07	8.57578e+07	1.10031e+08	3.85673e+07
cbdbA1426	High	Master Protein	Q3ZYY7	Putative ribosomal subunit interface protein OS=Dehalococcoides mccartyi (strain CBDB1) GN=cbdbA1426 PE=4 SV=1	FALSE	0	89.084	74	13	215	13	1	179	20.8	8.62	High	High	High	High	High	High	3.59669e+07	5.75444e+07	5.40844e+07	3.0373e+08	4.53828e+08	2.82387e+08
cbdbA149	High	Master Protein	Q3ZWJ9	Cobyrinate a,c-diamide synthase OS=Dehalococcoides mccartyi (strain CBDB1) GN=cbiA PE=3 SV=1	FALSE	0	88.955	43	13	223	13	1	463	50.3	6.29	High	High	High	High	High	High	1.45383e+07	3.0267e+07	3.46878e+07	1.73135e+08	1.49247e+08	1.51535e+08
cbdbA42	High	Master Protein	Q3ZWD8	Guanylate kinase OS=Dehalococcoides mccartyi (strain CBDB1) GN=gmk PE=3 SV=1	FALSE	0	88.868	59	12	119	12	1	206	23.4	6.09	High	High	High	High	High	High	1.79453e+07	5.68477e+06	3.79978e+07	1.06758e+08	1.10922e+08	1.14875e+08
cbdbA909	High	Master Protein	Q3ZXT1	Hsp20 OS=Dehalococcoides mccartyi (strain CBDB1) GN=cbdbA909 PE=3 SV=1	FALSE	0	88.636	81	11	90	11	1	162	18.5	5.76	High	High	High	High	High	High	2.12229e+07	1.99073e+07	2.05501e+07	1.19067e+08	2.40309e+08	5.3951e+07
cbdbA1039	High	Master Protein	Q3ZY45	ABC-type dipeptide/oligopeptide/nickel transport system, periplasmic component OS=Dehalococcoides mccartyi (strain CBDB1) GN=cbdbA1039 PE=4 SV=1	FALSE	0	88.562	39	15	76	15	1	558	61	4.74	High	Not Found	High	High	High	High	7.77916e+06		2.32022e+07	8.05017e+07	1.0866e+08	7.93817e+07
cbdbA1285	High	Master Protein	Q3ZYM4	Uncharacterized protein OS=Dehalococcoides mccartyi (strain CBDB1) GN=cbdbA1285 PE=4 SV=1	FALSE	0	88.339	54	7	142	7	1	154	16.8	9.06	High	High	High	High	High	High	2.05745e+08	5.0457e+06	31223722	1.92894e+08	1.28739e+08	1.41764e+08
cbdbA45	High	Master Protein	Q3ZWD6	PyrK family protein OS=Dehalococcoides mccartyi (strain CBDB1) GN=cbdbA45 PE=4 SV=1	FALSE	0	88.214	55	13	126	13	1	282	30.5	6.54	High	High	High	High	High	High	1.13883e+07	1.72327e+07	1.82033e+07	8.37383e+07	9.93958e+07	8.09163e+07
cbdbA1519	High	Master Protein	Q3ZZ80	Putative CRISPR-associated protein OS=Dehalococcoides mccartyi (strain CBDB1) GN=cbdbA1519 PE=4 SV=1	FALSE	0	87.751	63	13	76	13	1	209	23.4	9.41	High	High	High	High	High	High	2.2127e+07	1.94678e+07	4.71208e+07	7.64427e+07	1.37482e+08	8.8337e+07
cbdbA1458	High	Master Protein	Q3ZZ03	Peptide ABC transporter, ATP-binding protein OS=Dehalococcoides mccartyi (strain CBDB1) GN=cbdbA1458 PE=3 SV=1	FALSE	0	87.708	58	14	90	14	1	311	34.6	7.4	High	High	High	High	High	High	4.82604e+06	6.86718e+06	5.81066e+06	6.53582e+07	4.72932e+07	3.75393e+07
cbdbA1377	High	Master Protein	Q3ZYT6	Amidophosphoribosyltransferase OS=Dehalococcoides mccartyi (strain CBDB1) GN=purF PE=3 SV=1	FALSE	0	87.655	32	11	63	11	1	472	51.5	7.01	High	High	High	High	High	High	1.97935e+07	1.27475e+07	4.58075e+07	6.45009e+07	5.45249e+07	4.23966e+07
cbdbA1703	High	Master Protein	Q3ZW81	Uncharacterized protein OS=Dehalococcoides mccartyi (strain CBDB1) GN=cbdbA1703 PE=4 SV=1	FALSE	0	87.609	52	11	72	11	1	256	27.6	6.7	High	Not Found	High	High	High	High	1.10862e+07			7.09716e+07	9.85465e+07	7.50324e+07
cbdbA933	High	Master Protein	Q3ZXV5	4-hydroxy-tetrahydrodipicolinate reductase OS=Dehalococcoides mccartyi (strain CBDB1) GN=dapB PE=3 SV=1	FALSE	0	87.528	67	11	68	11	1	263	28.1	6.74	Not Found	High	High	High	High	High		2.72682e+07	2.23476e+07	1.85505e+08	2.15014e+08	1.40813e+08
cbdbA616	High	Master Protein	Q3ZX32	D-ala D-alanine ligase OS=Dehalococcoides mccartyi (strain CBDB1) GN=ddl PE=4 SV=1	FALSE	0	87.284	68	13	128	13	1	338	37.1	5.14	High	High	High	High	High	High	2.04227e+07	2.35314e+07	2.77411e+07	1.0582e+08	7.31448e+07	8.65439e+07
cbdbA1470	High	Master Protein	Q3ZZ38	Uncharacterized protein OS=Dehalococcoides mccartyi (strain CBDB1) GN=cbdbA1470 PE=4 SV=1	FALSE	0	87.113	48	10	96	10	1	258	27.8	5.34	High	High	High	High	High	High	8.39225e+06	8.63606e+06	6.30122e+06	8.88898e+07	9.25068e+07	7.88172e+07
cbdbA730	High	Master Protein	Q3ZXB1	Uncharacterized protein OS=Dehalococcoides mccartyi (strain CBDB1) GN=cbdbA730 PE=3 SV=1	FALSE	0	87.05	74	13	94	13	1	220	24.4	7.34	High	High	High	High	High	High	1.00368e+07	1.07618e+07	1.10532e+07	1.52996e+08	1.55602e+08	1.05768e+08
cbdbA1735	High	Master Protein	Q3ZZW5	MazG family protein OS=Dehalococcoides mccartyi (strain CBDB1) GN=cbdbA1735 PE=4 SV=1	FALSE	0	86.698	51	13	115	13	1	261	29.9	5.25	High	High	High	High	High	High	5.67839e+06	8.04018e+06	3.70619e+06	3.96297e+07	4.76204e+07	3.80783e+07
cbdbA181	High	Master Protein	Q3ZWM2	Putative threonine aldolase (COG2008) OS=Dehalococcoides mccartyi (strain CBDB1) GN=gly1 PE=4 SV=1	FALSE	0	86.603	48	12	80	12	1	344	36.7	7.46	High	High	High	High	High	High	2.80104e+07	8.48612e+06	5.88887e+06	4.36422e+07	6.59883e+07	6.14358e+07
cbdbA1418	High	Master Protein	Q3ZYZ3	Uncharacterized protein OS=Dehalococcoides mccartyi (strain CBDB1) GN=cbdbA1418 PE=4 SV=1	FALSE	0	86.586	83	10	76	10	1	133	15.1	8.62	Not Found	High	High	High	High	High		1.08231e+07	1.3361e+07	8.27613e+07	1.018e+08	7.71822e+07
cbdbA59	High	Master Protein	Q3ZWC7	Uncharacterized protein OS=Dehalococcoides mccartyi (strain CBDB1) GN=cbdbA59 PE=4 SV=1	FALSE	0	86.224	63	6	209	6	1	80	9.1	7.28	High	High	High	High	High	High	2.84795e+07	1.43561e+07	2.90283e+06	7.11851e+07	3.88178e+07	6.85259e+07
cbdbA1194	High	Master Protein	Q3ZYF2	ATP-dependent DNA helicase RecG OS=Dehalococcoides mccartyi (strain CBDB1) GN=recG PE=4 SV=1	FALSE	0	86.082	36	18	46	18	1	740	82.6	9.25	High	High	High	High	High	High	3.96543e+06	465206	9.29135e+06	1.06465e+07	4.7779e+06	9.59105e+06
cbdbA1178	High	Master Protein	Q3ZYG5	Twitching mobility protein OS=Dehalococcoides mccartyi (strain CBDB1) GN=pilT PE=4 SV=1	FALSE	0	86.031	42	16	104	14	1	358	39.8	6.62	High	High	High	High	High	High	8.21153e+06	1.05792e+07	1.48738e+07	8.27582e+07	8.39718e+07	4.08643e+07
cbdbA592	High	Master Protein	Q3ZWZ6	Uncharacterized protein OS=Dehalococcoides mccartyi (strain CBDB1) GN=cbdbA592 PE=4 SV=1	FALSE	0	86.008	60	6	183	6	1	75	8.6	6.57	High	High	High	High	High	High	8.85955e+07	9.37759e+07	2.75329e+08	7.91082e+08	8.01044e+08	6.77559e+08
cbdbA579	High	Master Protein	Q3ZX06	Glutamine amidotransferase subunit PdxT OS=Dehalococcoides mccartyi (strain CBDB1) GN=pdxT PE=3 SV=1	FALSE	0	85.372	65	11	84	11	1	195	21	8.75	High	High	High	High	High	High	3.95511e+06	6.82529e+06	3.93861e+06	9.06264e+07	8.40514e+07	5.31219e+07
cbdbA1324	High	Master Protein	Q3ZYT3	Dihydroorotate dehydrogenase OS=Dehalococcoides mccartyi (strain CBDB1) GN=pyrD PE=3 SV=1	FALSE	0	84.992	45	8	117	8	1	310	32.8	6.6	High	High	High	High	High	High	2.49068e+07	3.74226e+07	3.78473e+07	1.56857e+08	1.58861e+08	1.26457e+08
cbdbA5	High	Master Protein	Q3ZW91	GTP pyrophosphokinase OS=Dehalococcoides mccartyi (strain CBDB1) GN=relA PE=3 SV=1	FALSE	0	84.843	31	18	73	18	1	728	82.2	7.4	High	High	High	High	High	High	8.57976e+06	8.20931e+06	9.42188e+06	7.7913e+07	4.59108e+07	2.03984e+07
cbdbA1532	High	Master Protein	Q3ZVU5	Putative transcriptional regulator OS=Dehalococcoides mccartyi (strain CBDB1) GN=cbdbA1532 PE=4 SV=1	FALSE	0	84.645	46	10	46	10	1	349	40.2	6.8	High	High	High	High	High	High	1.79984e+07	2.1511e+07	1.17547e+07	2.13099e+07	4.35743e+07	5.21169e+07
cbdbA1663	High	Master Protein	Q3ZW24	Mechanosensitive ion channel family protein OS=Dehalococcoides mccartyi (strain CBDB1) GN=cbdbA1663 PE=4 SV=1	FALSE	0	84.385	32	15	141	15	1	458	49.7	6.58	High	High	High	High	High	High	4.03472e+07	5.56922e+07	3.67813e+07	1.48167e+08	1.11196e+08	1.23279e+08
cbdbA493	High	Master Protein	Q3ZZS4	Uncharacterized protein OS=Dehalococcoides mccartyi (strain CBDB1) GN=cbdbA493 PE=4 SV=1	FALSE	0	83.969	52	9	102	9	1	276	30.7	4.61	High	High	High	High	High	High	8.91438e+06	1.33967e+07	1.0314e+07	1.21519e+08	1.38875e+08	1.2628e+08
cbdbA463	High	Master Protein	Q3ZZP9	30S ribosomal protein S13 OS=Dehalococcoides mccartyi (strain CBDB1) GN=rpsM PE=3 SV=1	FALSE	0	83.868	51	15	235	15	1	129	14.8	10.7	High	High	High	High	High	High	3.0728e+08	3.75101e+08	2.63344e+08	1.39588e+09	1.45447e+09	6.34489e+08
cbdbA1709	High	Master Protein	Q3ZW75	HIT domain protein OS=Dehalococcoides mccartyi (strain CBDB1) GN=cbdbA1709 PE=4 SV=1	FALSE	0	83.835	63	10	73	10	1	163	18.8	8.43	High	High	High	High	High	High	6.51119e+06	1.7148e+07	5.23206e+07	1.14909e+08	1.50545e+08	7.72218e+07
cbdbA1384	High	Master Protein	Q3ZYX6	SAM-dependent methyltransferase UbiE/COQ5 family OS=Dehalococcoides mccartyi (strain CBDB1) GN=cbdbA1384 PE=4 SV=1	FALSE	0	83.764	41	9	84	9	1	278	29.3	4.49	High	High	High	High	High	High	7.55277e+06	4.9918e+06	1.23493e+06	9.14103e+07	5.85099e+07	6.93078e+07
cbdbA995	High	Master Protein	Q3ZXY8	Uncharacterized protein OS=Dehalococcoides mccartyi (strain CBDB1) GN=cbdbA995 PE=4 SV=1	FALSE	0	83.691	57	7	162	7	1	46	5.3	10.08	High	High	High	High	High	High	1.0391e+07	4.91839e+07	1.65486e+06	1.14077e+09	7.32797e+08	1.14895e+09
cbdbA618	High	Master Protein	Q3ZX26	Cation ABC transporter, periplasmc-binding protein OS=Dehalococcoides mccartyi (strain CBDB1) GN=cbdbA618 PE=3 SV=1	FALSE	0	83.575	39	8	96	8	1	290	32.5	4.68	High	High	High	High	High	High	5.34779e+07	4.93465e+07	83402263	1.30169e+08	1.52314e+08	1.60471e+08
cbdbA1449	High	Master Protein	Q3ZZ12	3-deoxy-D-arabino-heptulosonate 7-phosphate (DAHP) synthetase OS=Dehalococcoides mccartyi (strain CBDB1) GN=aroA PE=4 SV=1	FALSE	0	83.443	48	11	128	11	1	340	36.9	6.99	High	High	High	High	High	High	6.12987e+06	1.13537e+07	1.83824e+07	1.1972e+08	1.19639e+08	9.78915e+07
cbdbA576	High	Master Protein	Q3ZX09	Peptidyl-tRNA hydrolase OS=Dehalococcoides mccartyi (strain CBDB1) GN=pth PE=3 SV=1	FALSE	0	83.23	71	11	62	11	1	189	20.4	8.57	Not Found	High	Not Found	High	High	High		538841		6.31965e+07	5.75847e+07	2.80611e+07
cbdbA1119	High	Master Protein	Q3ZYB6	Dihydroorotate dehydrogenase, electron transfersubunit OS=Dehalococcoides mccartyi (strain CBDB1) GN=pyrK PE=4 SV=1	FALSE	0	83.117	54	10	84	10	1	261	28	5.83	High	High	High	High	High	High	5.63658e+06	8.289e+06	1.4468e+07	9.56221e+07	9.24891e+07	6.17148e+07
cbdbA660	High	Master Protein	Q3ZX40	Formate--tetrahydrofolate ligase OS=Dehalococcoides mccartyi (strain CBDB1) GN=fhs PE=3 SV=1	FALSE	0	83.062	32	14	71	14	1	597	64.5	7.08	High	High	High	High	High	High	8.77597e+06	1.15046e+07	1.56815e+07	3.52711e+07	3.94072e+07	5.09223e+07
cbdbA457	High	Master Protein	Q3ZZQ5	50S ribosomal protein L15 OS=Dehalococcoides mccartyi (strain CBDB1) GN=rplO PE=3 SV=1	FALSE	0	82.725	68	12	313	12	1	153	16.7	10.27	High	High	High	High	High	High	4.27117e+07	6.58725e+07	5.76273e+07	6.04083e+08	6.86559e+08	2.73161e+08
cbdbA1390	High	Master Protein	Q3ZYX0	tRNA N6-adenosine threonylcarbamoyltransferase OS=Dehalococcoides mccartyi (strain CBDB1) GN=tsaD PE=3 SV=1	FALSE	0	82.687	48	13	106	13	1	326	34.2	6.16	High	High	High	High	High	High	1.06978e+07	1.32386e+07	9.21391e+06	7.86985e+07	7.25509e+07	6.494e+07
cbdbA292	High	Master Protein	Q3ZZ96	GatB domain containing protein OS=Dehalococcoides mccartyi (strain CBDB1) GN=cbdbA292 PE=4 SV=1	FALSE	0	82.275	46	10	124	10	1	149	16.7	8.03	High	High	High	High	High	High	1.8709e+07	1.75025e+07	2.49673e+07	1.18516e+08	1.35995e+08	9.15574e+07
cbdbA500	High	Master Protein	Q3ZZR9	Glucose-1-phosphate thymidylyltransferase OS=Dehalococcoides mccartyi (strain CBDB1) GN=cbdbA500 PE=4 SV=1	FALSE	0	82.14	44	13	69	13	1	393	41.9	8.03	Not Found	High	High	High	High	High		6.01511e+06	7.79064e+06	8.93415e+07	1.45453e+08	2.88933e+07
cbdbA540	High	Master Protein	Q3ZZT5	Ribosome maturation factor RimM OS=Dehalococcoides mccartyi (strain CBDB1) GN=rimM PE=3 SV=1	FALSE	0	81.755	62	13	127	13	1	166	18.2	4.79	High	High	High	High	High	High	4.48753e+06	3.38874e+06	1.06669e+06	1.09343e+08	9.65393e+07	8.19118e+07
cbdbA1363	High	Master Protein	Q3ZYU8	Uncharacterized protein OS=Dehalococcoides mccartyi (strain CBDB1) GN=cbdbA1363 PE=4 SV=1	FALSE	0	81.667	49	7	179	7	1	210	22.7	5.71	High	High	High	High	High	High	7.50974e+07	9.78589e+07	2.13794e+06	5.64493e+08	5.69431e+08	5.21616e+08
cbdbA105	High	Master Protein	Q3ZWI2	Putative type I restriction enzyme, specificity protein OS=Dehalococcoides mccartyi (strain CBDB1) GN=cbdbA105 PE=4 SV=1	FALSE	0	81.205	68	9	76	9	1	222	24.5	8.65	High	High	High	High	High	High	4.46697e+06	907820	2.43671e+06	5.58768e+07	7.91179e+07	6.29539e+07
cbdbA428	High	Master Protein	Q3ZZK9	Shikimate kinase OS=Dehalococcoides mccartyi (strain CBDB1) GN=aroK PE=3 SV=1	FALSE	0	80.825	79	12	115	12	1	176	19.9	6.67	High	High	High	High	High	High	1.95129e+07	1.86959e+07	7.94585e+06	4.54112e+07	3.59537e+07	2.44227e+07
cbdbA1225	High	Master Protein	Q3ZYH8	Ribonuclease PH OS=Dehalococcoides mccartyi (strain CBDB1) GN=rph PE=3 SV=1	FALSE	0	80.787	54	11	157	11	1	241	26.5	5.82	High	High	High	High	High	High	1.16411e+07	1.25296e+07	1.63736e+07	1.67962e+08	1.50269e+08	1.2547e+08
cbdbA1054	High	Master Protein	Q3ZY31	Uncharacterized protein OS=Dehalococcoides mccartyi (strain CBDB1) GN=cbdbA1054 PE=4 SV=1	FALSE	0	80.712	32	6	209	6	1	256	28.1	6.52	High	High	High	High	High	High	1.35061e+08	1.36387e+08	1.31435e+08	5.43154e+08	6.02071e+08	4.37564e+08
cbdbA680	High	Master Protein	Q3ZX70	Pyruvic-ferredoxin oxidoreductase, delta subunit OS=Dehalococcoides mccartyi (strain CBDB1) GN=porD PE=4 SV=1	FALSE	0	80.608	71	7	208	7	1	86	9.5	5.38	High	High	High	High	High	High	5.50986e+07	4.45387e+07	1.62402e+07	8.87503e+08	8.05986e+08	554939964
cbdbA752	High	Master Protein	Q3ZXD8	Thymidylate kinase OS=Dehalococcoides mccartyi (strain CBDB1) GN=tmk PE=3 SV=1	FALSE	0	80.539	58	15	135	15	1	208	23.1	8.06	High	High	High	High	High	High	1.0944e+07	1.44468e+07	1.68426e+07	2.33994e+08	2.22194e+08	1.53153e+08
cbdbA198	High	Master Protein	Q3ZWQ4	Ferredoxin, iron-sulfur cluster-binding protein OS=Dehalococcoides mccartyi (strain CBDB1) GN=fdx1 PE=4 SV=1	FALSE	0	80.066	86	7	237	7	1	84	9.2	4.41	High	High	High	High	High	High	4.51392e+08	3.92783e+08	5.71171e+08	1.60042e+09	1.78909e+09	1.43936e+09
cbdbA1023	High	Master Protein	Q3ZY10	Putative translation initiation inhibitor OS=Dehalococcoides mccartyi (strain CBDB1) GN=cbdbA1023 PE=4 SV=1	FALSE	0	79.949	70	7	134	7	1	125	13.5	6.07	High	High	High	High	High	High	9.06734e+07	1.13313e+08	8.60286e+07	5.93509e+08	6.94028e+08	4.66795e+08
cbdbA276	High	Master Protein	Q3ZZA9	Putative DNA-binding protein OS=Dehalococcoides mccartyi (strain CBDB1) GN=cbdbA276 PE=4 SV=1	FALSE	0	79.836	79	10	175	10	1	133	14.8	8.44	High	High	High	High	High	High	7.20036e+07	9.84116e+07	1.21622e+08	5.908e+08	6.00496e+08	4.75262e+08
cbdbA1042	High	Master Protein	Q3ZY42	Sensor histidine kinase OS=Dehalococcoides mccartyi (strain CBDB1) GN=cbdbA1042 PE=4 SV=1	FALSE	0	79.781	17	17	38	17	1	1229	138.3	7.15	High	High	High	High	High	High	2.77479e+06	5.00499e+06	2.06672e+06	5.39343e+06	1.99743e+07	5984081
cbdbA621	High	Master Protein	Q3ZX21	Uncharacterized protein OS=Dehalococcoides mccartyi (strain CBDB1) GN=cbdbA621 PE=4 SV=1	FALSE	0	79.111	88	12	118	12	1	116	13.1	8.5	High	High	High	High	High	High	1.60917e+07	1.97197e+07	2.11834e+07	1.33151e+08	1.10491e+08	7.96366e+07
cbdbA1720	High	Master Protein	Q3ZZX7	Putative desulforedoxin OS=Dehalococcoides mccartyi (strain CBDB1) GN=cbdbA1720 PE=4 SV=1	FALSE	0	79.074	87	7	277	7	1	55	5.9	6.44	High	High	High	High	High	High	1.11467e+08	1.41681e+08	9.57312e+07	5.21924e+08	5.6589e+08	5.68643e+08
cbdbB36	High	Master Protein	Q3ZZ79	Uncharacterized protein OS=Dehalococcoides mccartyi (strain CBDB1) GN=cbdbA1519.1 PE=4 SV=1	FALSE	0	78.903	73	13	43	13	1	205	23.1	8.06	Not Found	Not Found	High	High	High	High			6.68651e+06	4.37097e+07	2.69839e+07	4.07248e+07
cbdbA1686	High	Master Protein	Q3ZW54	ApbE OS=Dehalococcoides mccartyi (strain CBDB1) GN=cbdbA1686 PE=4 SV=1	FALSE	0	78.708	44	11	86	11	1	353	37.9	5.62	High	High	High	High	High	High	7.67717e+06	6.52747e+06	1.07037e+07	5.07251e+07	4.03967e+07	3.16802e+07
cbdbA588	High	Master Protein	Q3ZWZ9	Holliday junction ATP-dependent DNA helicase RuvB OS=Dehalococcoides mccartyi (strain CBDB1) GN=ruvB PE=3 SV=1	FALSE	0	78.651	49	13	50	13	1	349	38.8	7.27	Not Found	High	High	High	High	High		3.39759e+06		4.30702e+07	7.86648e+07	3.13084e+07
cbdbA43	High	Master Protein	Q3ZWD7	UPF0296 protein cbdbA43 OS=Dehalococcoides mccartyi (strain CBDB1) GN=cbdbA43 PE=3 SV=1	FALSE	0	78.334	86	8	96	8	1	96	10.4	9.7	High	High	High	High	High	High	2.85913e+07	6.03623e+07	2.59337e+07	2.21757e+08	1.76568e+08	1.87581e+08
cbdbA942	High	Master Protein	Q3ZXU8	Glycosyl transferase, group 1 family protein OS=Dehalococcoides mccartyi (strain CBDB1) GN=cbdbA942 PE=4 SV=1	FALSE	0	78.328	47	12	65	12	1	382	42.9	9.31	High	High	High	High	High	High	3.07963e+07	3.92032e+07	2.34956e+07	6.51948e+07	5.39211e+07	1.75221e+07
cbdbA492	High	Master Protein	Q3ZZS5	PBS lyase HEAT-like repeat domain protein OS=Dehalococcoides mccartyi (strain CBDB1) GN=cbdbA492 PE=4 SV=1	FALSE	0	77.707	56	11	73	11	1	316	34.8	4.51	High	High	High	High	Not Found	High	8.24337e+06	9.00664e+06	6.26586e+06	1.33473e+07		1.19978e+07
cbdbA1167	High	Master Protein	Q3ZYC4	Uncharacterized protein OS=Dehalococcoides mccartyi (strain CBDB1) GN=cbdbA1167 PE=4 SV=1	FALSE	0	77.672	50	10	73	10	1	155	18.5	8.85	High	High	High	High	High	High	1.44164e+07	1.7922e+07	1.0326e+07	8.44184e+07	6.54296e+07	7.67453e+07
cbdbA1704	High	Master Protein	Q3ZW80	PHP domain N-terminal region family protein OS=Dehalococcoides mccartyi (strain CBDB1) GN=cbdbA1704 PE=4 SV=1	FALSE	0	77.501	53	7	70	7	1	287	31.5	6.4	High	High	High	High	High	High	5.79016e+06	7.7275e+06	5.25527e+06	8.17743e+07	8.27857e+07	4.14362e+07
cbdbA801	High	Master Protein	Q3ZXJ0	RNA-splicing ligase RtcB OS=Dehalococcoides mccartyi (strain CBDB1) GN=cbdbA801 PE=3 SV=1	FALSE	0	77.135	40	13	59	13	1	486	52.5	7.12	High	High	High	High	High	High	5.4139e+06	6.03564e+06	7.28202e+06	1.68279e+07	2.04311e+07	2.94094e+06
cbdbA887	High	Master Protein	Q3ZXR0	Hydrolase, TatD family OS=Dehalococcoides mccartyi (strain CBDB1) GN=cbdbA887 PE=4 SV=1	FALSE	0	77.129	74	12	97	12	1	262	28.8	5.26	High	High	High	High	High	High	7.9859e+06	2.43264e+07	1.24261e+07	1.25523e+08	1.25686e+08	6.22909e+07
cbdbA1203	High	Master Protein	Q3ZYG8	50S ribosomal protein L32 OS=Dehalococcoides mccartyi (strain CBDB1) GN=rpmF PE=3 SV=1	FALSE	0	76.874	64	4	380	4	1	72	7.8	9.82	High	High	High	High	High	High	3.03468e+08	2.50888e+08	1.10957e+08	1.39908e+09	1.40068e+09	1.58928e+09
cbdbA328	High	Master Protein	Q3ZZB7	Iron-sulfur cluster-binding protein, Rieske domain OS=Dehalococcoides mccartyi (strain CBDB1) GN=cbdbA328 PE=4 SV=1	FALSE	0	76.628	66	9	141	9	1	125	13.4	7.83	High	High	High	High	High	High	2.47457e+07	5.21594e+07	3.98582e+07	1.4204e+08	1.71076e+08	1.7193e+08
cbdbA510	High	Master Protein	Q3ZZR3	Uncharacterized protein OS=Dehalococcoides mccartyi (strain CBDB1) GN=cbdbA510 PE=4 SV=1	FALSE	0	76.562	49	12	96	12	1	277	31.3	5.66	High	High	High	High	High	High	1.12993e+07	1.33854e+07	1.79177e+07	2.07135e+08	1.69195e+08	1.67224e+08
cbdbA1613	High	Master Protein	Q3ZW15	Hypothetical upf0313 protein OS=Dehalococcoides mccartyi (strain CBDB1) GN=cbdbA1613 PE=4 SV=1	FALSE	0	76.353	31	13	50	13	1	583	66.3	9.23	High	Not Found	High	High	High	High	2.37597e+06		3.18753e+06	1.29322e+07	1.26659e+07	1.76302e+07
cbdbA369	High	Master Protein	Q3ZZI2	Amino acid ABC transporter, ATP-binding protein OS=Dehalococcoides mccartyi (strain CBDB1) GN=cbdbA369 PE=3 SV=1	FALSE	0	76.345	38	9	54	9	1	253	28.1	8.03	High	High	High	Not Found	High	High	1.77842e+07	2.9215e+07	2.23464e+07		3.11642e+07	8.83509e+06
cbdbA464	High	Master Protein	Q3ZZP8	30S ribosomal protein S11 OS=Dehalococcoides mccartyi (strain CBDB1) GN=rpsK PE=3 SV=1	FALSE	0	76.223	37	8	393	8	1	130	13.7	11.08	High	High	High	High	High	High	4.11836e+08	4.90063e+08	2.31707e+08	1.34631e+09	1.21473e+09	1.23622e+09
cbdbA289	High	Master Protein	Q3ZZ98	Uncharacterized protein OS=Dehalococcoides mccartyi (strain CBDB1) GN=cbdbA289 PE=4 SV=1	FALSE	0	75.979	65	14	104	14	1	194	22.3	8.51	High	High	High	High	High	High	9.83705e+06	1.37942e+07	1.04016e+07	7.41815e+07	1.27773e+08	8.02488e+07
cbdbA758	High	Master Protein	Q3ZXD4	Thiamine-phosphate synthase OS=Dehalococcoides mccartyi (strain CBDB1) GN=thiE PE=3 SV=1	FALSE	0	75.681	44	11	80	11	1	352	38.4	5.64	High	High	High	High	High	High	6.4306e+06	5.26814e+06	1.13801e+07	7.53339e+07	6.88202e+07	5.14536e+07
cbdbA1136	High	Master Protein	Q3ZYA1	HAD-superfamily hydrolase, subfamily IIB OS=Dehalococcoides mccartyi (strain CBDB1) GN=cbdbA1136 PE=4 SV=1	FALSE	0	75.595	50	12	65	12	1	271	30.1	5.1	High	High	Not Found	High	High	High	3.1843e+06	3.26254e+06		7.54302e+07	75113173	4.4262e+07
cbdbA953	High	Master Protein	Q3ZXY1	Uncharacterized protein OS=Dehalococcoides mccartyi (strain CBDB1) GN=cbdbA953 PE=4 SV=1	FALSE	0	75.582	51	8	111	8	1	214	23.7	8.12	High	High	High	High	High	High	2.07867e+07	2.54367e+07	3.90188e+07	1.65766e+08	1.48507e+08	7.59507e+07
cbdbA1356	High	Master Protein	Q3ZYV3	Glycerol-3-phosphate dehydrogenase [NAD(P)+] OS=Dehalococcoides mccartyi (strain CBDB1) GN=gpsA PE=3 SV=1	FALSE	0	75.516	41	10	89	10	1	359	38.5	8.05	High	High	High	High	High	High	3.91428e+06	3.72195e+06	2.03005e+07	6.68416e+07	9.2696e+07	5.7289e+07
cbdbA346	High	Master Protein	Q3ZZF4	Uncharacterized protein OS=Dehalococcoides mccartyi (strain CBDB1) GN=cbdbA346 PE=4 SV=1	FALSE	0	75.474	63	10	115	10	1	163	18.2	4.5	High	High	High	High	High	High	5.65394e+06	6.16571e+06	2.02779e+07	1.07497e+08	1.18559e+08	7.65688e+07
cbdbA1648	High	Master Protein	Q3ZW36	Conserved domain protein OS=Dehalococcoides mccartyi (strain CBDB1) GN=cbdbA1648 PE=4 SV=1	FALSE	0	75.445	31	10	69	10	1	345	38	8.53	High	High	Not Found	High	High	High	1.36251e+06	1.8519e+06		7.06297e+07	9.36974e+07	3.06479e+07
cbdbA1212	High	Master Protein	Q3ZYI5	Glutamate 5-kinase OS=Dehalococcoides mccartyi (strain CBDB1) GN=proB PE=3 SV=1	FALSE	0	75.442	40	12	76	12	1	373	40.1	6.62	High	High	High	High	High	High	1.1167e+07	2.02751e+07	1.43493e+07	6.51669e+07	6.05574e+07	4.76414e+07
cbdbA33	High	Master Protein	Q3ZW96	Putative potassium uptake protein OS=Dehalococcoides mccartyi (strain CBDB1) GN=cbdbA33 PE=4 SV=1	FALSE	0	75.427	40	8	87	8	1	134	14.7	6.67	High	High	High	High	High	High	7.05452e+06	5.29837e+06	2.54612e+06	7.1531e+07	1.33764e+08	4.20076e+07
cbdbA1260	High	Master Protein	Q3ZYJ6	Uncharacterized protein OS=Dehalococcoides mccartyi (strain CBDB1) GN=cbdbA1260 PE=4 SV=1	FALSE	0	75.165	60	12	67	12	1	243	27.5	5.63	High	High	High	High	High	High	1.22277e+07	1.12343e+07	3.61423e+06	8.16597e+07	4.81104e+07	4.5603e+07
cbdbA20	High	Master Protein	Q3ZWA5	Uncharacterized protein OS=Dehalococcoides mccartyi (strain CBDB1) GN=cbdbA20 PE=4 SV=1	FALSE	0	75.122	63	8	167	8	1	87	10.1	6.76	High	High	High	High	High	High	5.15827e+07	8.65234e+07	5.91239e+07	3.41485e+08	4.94484e+08	3.35682e+08
cbdbA1040	High	Master Protein	Q3ZY44	Metallo-beta-lactamase family protein OS=Dehalococcoides mccartyi (strain CBDB1) GN=cbdbA1040 PE=4 SV=1	FALSE	0	74.955	38	14	61	14	1	468	52.4	6.73	High	High	High	High	High	High	5.50612e+06	8.54587e+06	8.72422e+06	3.31662e+07	3.22231e+07	3.23876e+07
cbdbA1543	High	Master Protein	Q3ZVT2	Sensor histidine kinase OS=Dehalococcoides mccartyi (strain CBDB1) GN=rdhC PE=4 SV=1	FALSE	0	74.786	32	12	39	12	1	537	60.9	7.17	Not Found	Not Found	High	High	High	High			1.49079e+06	2.84193e+07	1.93877e+07	1.99852e+07
cbdbA1099	High	Master Protein	Q3ZY87	Uncharacterized protein OS=Dehalococcoides mccartyi (strain CBDB1) GN=cbdbA1099 PE=4 SV=1	FALSE	0	74.651	86	7	207	7	1	78	8.7	7.14	High	High	High	High	High	High	5.4761e+07	6.74383e+07	2.90873e+07	2.29209e+08	2.88752e+08	1.67775e+08
cbdbA350	High	Master Protein	Q3ZZF1	Putative ubiquinone/menaquinone biosynthesis methlytransferase UbiE OS=Dehalococcoides mccartyi (strain CBDB1) GN=cbdbA350 PE=4 SV=1	FALSE	0	74.504	53	10	77	10	1	255	28.7	9.41	High	High	High	High	High	High	2.38434e+06	6.54754e+06	3.19724e+06	2.61586e+07	6.99156e+07	2.15763e+07
cbdbA1422	High	Master Protein	Q3ZYY9	Uncharacterized protein OS=Dehalococcoides mccartyi (strain CBDB1) GN=cbdbA1422 PE=4 SV=1	FALSE	0	74.484	96	7	205	7	1	67	7.4	7.8	High	High	High	High	High	High	8.14224e+07	9.29943e+07	5.22428e+07	5.96272e+08	5.2477e+08	4.98436e+08
cbdbA441	High	Master Protein	Q3ZZM2	50S ribosomal protein L23 OS=Dehalococcoides mccartyi (strain CBDB1) GN=rplW PE=3 SV=1	FALSE	0	74.391	85	11	291	11	1	94	10.6	9.99	High	High	High	High	High	High	2.1119e+08	2.60251e+08	1.97988e+08	1.00772e+09	1.02256e+09	7.07357e+08
cbdbA649	High	Master Protein	Q3ZX47	Uncharacterized protein OS=Dehalococcoides mccartyi (strain CBDB1) GN=cbdbA649 PE=4 SV=1	FALSE	0	74.363	69	14	76	14	1	214	24.5	8.12	High	High	High	High	High	High	2.14076e+06	3.76658e+06	6.67894e+06	5.36926e+07	5.71122e+07	3.76588e+07
cbdbA1249	High	Master Protein	Q3ZYK6	ATPase, AAA family OS=Dehalococcoides mccartyi (strain CBDB1) GN=cbdbA1249 PE=4 SV=1	FALSE	0	73.875	38	13	35	13	1	457	50.7	6.65	High	High	High	High	High	High	2.42063e+06	2.3532e+06	1.25074e+06	1.86542e+07	18697396	1.58794e+07
cbdbA126	High	Master Protein	Q3ZWG7	LemA family domain protein OS=Dehalococcoides mccartyi (strain CBDB1) GN=cbdbA126 PE=4 SV=1	FALSE	0	73.837	36	16	93	16	1	434	49.4	8.5	High	High	High	High	High	High	1.00195e+07	8.244e+06	9.70976e+06	2.36132e+07	2.08557e+07	2.60797e+07
cbdbA989	High	Master Protein	Q3ZXZ4	Sensor histidine kinase/response regulator OS=Dehalococcoides mccartyi (strain CBDB1) GN=cbdbA989 PE=4 SV=1	FALSE	0	73.825	17	16	57	15	1	1262	142.6	6.37	Not Found	Not Found	High	High	High	High			4.64425e+06	2.30536e+07	2.93121e+07	2.35778e+07
cbdbA1104	High	Master Protein	Q3ZY83	Riboflavin synthase, alpha subunit OS=Dehalococcoides mccartyi (strain CBDB1) GN=ribE PE=4 SV=1	FALSE	0	73.403	72	10	65	10	1	205	22.2	7.61	High	High	Not Found	High	High	High	3.57675e+06	2.67336e+06		8.64342e+07	2.402e+07	3.46272e+07
cbdbA1064	High	Master Protein	Q3ZY70	Uncharacterized protein OS=Dehalococcoides mccartyi (strain CBDB1) GN=cbdbA1064 PE=4 SV=1	FALSE	0	73.208	56	9	40	9	1	168	18.9	8.5	High	High	High	High	High	High	1.42056e+06	1.59498e+06	1.9097e+06	1.18753e+07	1.67031e+07	1.56279e+07
cbdbA632	High	Master Protein	Q3ZX61	Conserved domain protein OS=Dehalococcoides mccartyi (strain CBDB1) GN=cbdbA632 PE=4 SV=1	FALSE	0	73.201	56	12	83	12	1	196	21	6.05	High	High	High	High	High	High	1.83074e+07	1.31349e+07	2.44767e+07	8.2163e+07	4.43717e+07	4.37955e+07
cbdbA1205	High	Master Protein	Q3ZYJ0	3-oxoacyl-acyl carrier protein reductase OS=Dehalococcoides mccartyi (strain CBDB1) GN=fabG PE=3 SV=1	FALSE	0	73.126	57	10	81	10	1	247	26.1	7.81	High	High	High	High	High	High	6.06292e+06	6.02781e+06	1.21759e+07	5.22382e+07	1.01903e+08	6.21351e+07
cbdbA1294	High	Master Protein	Q3ZYL6	4-hydroxy-3-methylbut-2-enyl diphosphate reductase OS=Dehalococcoides mccartyi (strain CBDB1) GN=ispH PE=3 SV=1	FALSE	0	73.087	47	11	64	11	1	284	30.3	6.73	High	High	High	High	High	High	2.7796e+06	4.51275e+06	4.06112e+06	4.53803e+07	6.67019e+07	3.02501e+07
cbdbA1361	High	Master Protein	Q3ZYU9	Heat-inducible transcription repressor HrcA OS=Dehalococcoides mccartyi (strain CBDB1) GN=hrcA PE=3 SV=1	FALSE	0	72.665	34	9	60	9	1	345	39.2	5.83	Not Found	High	Not Found	High	High	High		1.9227e+07		7.58735e+07	7.74873e+07	7.00635e+07
cbdbA627	High	Master Protein	Q3ZX15	Putative ribulose-phosphate 3-epimerase OS=Dehalococcoides mccartyi (strain CBDB1) GN=cbdbA627 PE=4 SV=1	FALSE	0	72.526	51	8	82	8	1	220	24.3	5.63	Not Found	High	High	High	High	High		2.36101e+07	1.21513e+07	7.09978e+07	7.21454e+07	8.54826e+07
cbdbA1685	High	Master Protein	Q3ZW55	Putative transcriptional regulator OS=Dehalococcoides mccartyi (strain CBDB1) GN=cbdbA1685 PE=4 SV=1	FALSE	0	72.512	64	12	112	12	1	148	16.5	7.88	High	High	High	High	High	High	1.17875e+07	1.66236e+07	3.30162e+07	1.90443e+08	2.58459e+08	1.43022e+08
cbdbA877	High	Master Protein	Q3ZXR8	NADH-quinone oxidoreductase subunit D OS=Dehalococcoides mccartyi (strain CBDB1) GN=nuoD PE=3 SV=1	FALSE	0	72.367	40	14	78	14	1	367	41.8	5.81	High	High	High	High	High	High	1.61751e+07	1.07575e+07	1.1294e+07	7.20309e+07	6.54584e+07	5.03892e+07
cbdbA191	High	Master Protein	Q3ZWQ9	Formate dehydrogenase accessory protein OS=Dehalococcoides mccartyi (strain CBDB1) GN=fdhE PE=4 SV=1	FALSE	0	72.269	51	10	78	10	1	282	32	5.71	High	High	High	High	High	High	2.88071e+06	2.22362e+06	8.66757e+06	5.06325e+07	3.67676e+07	3.91601e+07
cbdbA668	High	Master Protein	Q3ZX80	Probable phosphoribosylglycinamide transformylase OS=Dehalococcoides mccartyi (strain CBDB1) GN=cbdbA668 PE=4 SV=1	FALSE	0	72.203	56	13	60	13	1	273	31.1	7.74	High	Not Found	High	High	High	High	7.19536e+06		1.2565e+07	4.94022e+07	6.76616e+07	3.44871e+07
cbdbA1211	High	Master Protein	Q3ZYI6	Transcription-repair-coupling factor OS=Dehalococcoides mccartyi (strain CBDB1) GN=mfd PE=3 SV=1	FALSE	0	72.077	18	15	50	15	1	1148	128.3	5.85	High	High	Not Found	High	High	High	1.46661e+06	1.76327e+06		2.90228e+07	2.21027e+07	2.12734e+07
cbdbA1202	High	Master Protein	Q3ZYE6	Uncharacterized protein OS=Dehalococcoides mccartyi (strain CBDB1) GN=cbdbA1202 PE=4 SV=1	FALSE	0	71.974	68	9	161	9	1	147	16.6	4.6	High	High	High	High	High	High	6.9439e+06	1.68009e+07	4.40944e+06	2.86686e+08	1.79729e+08	2.39249e+08
cbdbA871	High	Master Protein	Q3ZXM5	Iron-sulfur cluster-binding protein OS=Dehalococcoides mccartyi (strain CBDB1) GN=cbdbA871 PE=4 SV=1	FALSE	0	71.775	70	10	76	10	1	136	15.5	7.9	High	High	High	High	High	High	6.27701e+06	1.13687e+07	1.29997e+07	8.03281e+07	7.12881e+07	5.27336e+07
cbdbA658	High	Master Protein	Q3ZX42	Carbon monoxide dehydrogenase nickel-insertion accessory protein OS=Dehalococcoides mccartyi (strain CBDB1) GN=acsF PE=4 SV=1	FALSE	0	71.726	47	10	73	10	1	260	28.4	7.4	High	High	High	High	High	High	4.9119e+06	6.82439e+06	8.72573e+06	5.75404e+07	9.47715e+07	4.57503e+07
cbdbA725	High	Master Protein	Q3ZXB6	Translation initiation factor IF-3 OS=Dehalococcoides mccartyi (strain CBDB1) GN=infC PE=3 SV=1	FALSE	0	71.566	45	7	89	7	1	157	17.7	9.99	High	High	High	High	High	High	1.15011e+07	7.63092e+06	2.48709e+07	8.58142e+07	8.52677e+07	5.08374e+07
cbdbA165	High	Master Protein	Q3ZWN4	Phosphate import ATP-binding protein PstB OS=Dehalococcoides mccartyi (strain CBDB1) GN=pstB PE=3 SV=1	FALSE	0	71.155	63	14	61	14	1	251	28.3	7.9	High	High	High	High	High	High	4.20602e+06	8.53541e+06	2.7847e+06	4.22999e+07	6.98141e+07	6.25784e+07
cbdbA319	High	Master Protein	Q3ZZC3	Uridylate kinase OS=Dehalococcoides mccartyi (strain CBDB1) GN=pyrH PE=3 SV=1	FALSE	0	71.104	39	8	67	8	1	241	26	7.44	High	High	High	High	High	High	1.36713e+07	1.84309e+07	1.07143e+07	1.03814e+08	1.35475e+08	7.41073e+07
cbdbA158	High	Master Protein	Q3ZWP0	DNA-binding response regulator OS=Dehalococcoides mccartyi (strain CBDB1) GN=cbdbA158 PE=4 SV=1	FALSE	0	70.284	60	11	72	11	1	230	26.1	6.25	High	High	High	High	High	High	4.90757e+06	5.21461e+06	6.3653e+06	7.00341e+07	7.86115e+07	5.55695e+07
cbdbA1548	High	Master Protein	Q3ZVS7	DNA-binding response regulator, LuxR family OS=Dehalococcoides mccartyi (strain CBDB1) GN=rdhD PE=4 SV=1	FALSE	0	69.218	57	11	66	11	1	238	26.7	8.31	High	High	High	High	High	High	6.01048e+06	8.6953e+06	1.11313e+07	5.55892e+07	8.59354e+07	6.83309e+07
cbdbA467	High	Master Protein	Q3ZZP5	50S ribosomal protein L17 OS=Dehalococcoides mccartyi (strain CBDB1) GN=rplQ PE=3 SV=1	FALSE	0	69.163	62	8	235	8	1	117	13.5	10.27	High	High	High	High	High	High	1.12126e+08	1.43459e+08	1.11621e+08	7.1907e+08	1.20132e+09	8.56069e+08
cbdbA1112	High	Master Protein	Q3ZY75	Bifunctional protein PyrR OS=Dehalococcoides mccartyi (strain CBDB1) GN=pyrR PE=3 SV=1	FALSE	0	68.911	73	12	92	12	1	182	20.5	5.49	High	High	High	High	High	High	1.50236e+07	2.23402e+07	1.1704e+07	1.91026e+08	1.12138e+08	1.56767e+08
cbdbA74	High	Master Protein	Q3ZWE1	2-C-methyl-D-erythritol 4-phosphate cytidylyltransferase OS=Dehalococcoides mccartyi (strain CBDB1) GN=ispD PE=3 SV=1	FALSE	0	68.852	52	12	101	12	1	227	24.6	6.77	High	High	High	High	High	High	1.52112e+07	2.42211e+07	1.40739e+07	7.95588e+07	7.77227e+07	6.5293e+07
cbdbA637	High	Master Protein	Q3ZX57	Uncharacterized protein OS=Dehalococcoides mccartyi (strain CBDB1) GN=rdhF PE=4 SV=1	FALSE	0	68.176	47	8	91	8	1	256	27.7	9.1	High	High	High	High	High	High	1.50838e+07	1.74003e+07	1.16338e+07	9.19487e+07	8.276e+07	4.64087e+07
cbdbA889	High	Master Protein	Q3ZXQ9	Endonuclease III OS=Dehalococcoides mccartyi (strain CBDB1) GN=nth PE=3 SV=1	FALSE	0	67.781	62	10	29	10	1	218	23.9	6.68	Not Found	Not Found	High	High	High	High			1.6337e+07	3.31479e+07	2.37135e+07	27763920
cbdbA413	High	Master Protein	Q3ZZJ4	Putative fumarate hydratase, beta subunit OS=Dehalococcoides mccartyi (strain CBDB1) GN=cbdbA413 PE=4 SV=1	FALSE	0	67.627	49	8	70	8	1	190	20.2	7.93	Not Found	High	Not Found	High	High	High				1.13658e+08	1.1184e+08	9.2956e+07
cbdbA1394	High	Master Protein	Q3ZYW7	Peptidase, M16 family OS=Dehalococcoides mccartyi (strain CBDB1) GN=cbdbA1394 PE=3 SV=1	FALSE	0	67.559	38	11	63	11	1	419	46	6.01	High	High	High	High	High	High	4.61219e+06	1.99827e+06	9.05545e+06	6.00514e+07	3.3621e+07	5.47697e+07
cbdbA816	High	Master Protein	Q3ZXH8	Putative translation factor Sua5 OS=Dehalococcoides mccartyi (strain CBDB1) GN=cbdbA816 PE=4 SV=1	FALSE	0	67.279	56	8	103	8	1	213	22.6	7.34	High	High	High	High	High	High	1.74418e+07	1.60068e+07	2.33584e+07	6.478e+07	7.12456e+07	7.10848e+07
cbdbA1182	High	Master Protein	Q3ZYG1	Uncharacterized protein OS=Dehalococcoides mccartyi (strain CBDB1) GN=cbdbA1182 PE=4 SV=1	FALSE	0	67.11	48	11	92	11	1	296	32.4	8.6	High	High	High	High	High	High	4.98985e+07	1.4423e+07	5.34519e+06	8.21918e+07	4.01922e+07	7.12277e+07
cbdbA1475	High	Master Protein	Q3ZZ34	Ferrous iron transport protein B OS=Dehalococcoides mccartyi (strain CBDB1) GN=feoB PE=4 SV=1	FALSE	0	67.045	28	9	53	9	1	576	62.1	6.54	High	High	High	High	High	High	1.11922e+07	1.94986e+07	4.77602e+06	2.51886e+07	2.90696e+07	2.87632e+07
cbdbA832	High	Master Protein	Q3ZXL2	Biotin-acetyl-CoA-carboxylase ligase OS=Dehalococcoides mccartyi (strain CBDB1) GN=birA PE=4 SV=1	FALSE	0	66.685	45	11	61	11	1	266	29.6	6.32	High	High	High	High	High	High	3.49868e+06	8.41668e+06	7.18666e+06	6.28805e+07	5.71938e+07	5.36532e+07
cbdbA1455	High	Master Protein	Q3ZZ06	Putative reductive dehalogenase OS=Dehalococcoides mccartyi (strain CBDB1) GN=rdhA PE=4 SV=1	FALSE	0	66.317	26	9	91	9	1	497	55.2	6.64	High	High	Not Found	High	High	High	5.41895e+06	7.32295e+06		2.59022e+07	2.30707e+07	2.19344e+07
cbdbA1440	High	Master Protein	Q3ZZ19	Uncharacterized protein OS=Dehalococcoides mccartyi (strain CBDB1) GN=cbdbA1440 PE=4 SV=1	FALSE	0	66.249	83	9	112	9	1	71	7.3	7.47	High	High	High	High	High	High	7.52747e+07	4.49718e+07	2.95288e+07	8.23544e+07	1.80519e+07	1.45593e+07
cbdbA867	High	Master Protein	Q3ZXM9	Uncharacterized protein OS=Dehalococcoides mccartyi (strain CBDB1) GN=cbdbA867 PE=4 SV=1	FALSE	0	66.195	40	8	72	8	1	302	34.1	6.54	High	High	High	High	High	High	1.81918e+07	2.43447e+07	1.66437e+07	1.06263e+08	9.17127e+07	7.77025e+07
cbdbA444	High	Master Protein	Q3ZZL9	50S ribosomal protein L22 OS=Dehalococcoides mccartyi (strain CBDB1) GN=rplV PE=3 SV=1	FALSE	0	66.184	70	10	266	10	1	109	12	10.33	High	High	High	High	High	High	1.13284e+08	1.41605e+08	2.21765e+08	5.63919e+08	1.60944e+09	4.7532e+08
cbdbA1608	High	Master Protein	Q3ZW20	Sensor histidine kinase/response regulator OS=Dehalococcoides mccartyi (strain CBDB1) GN=cbdbA1608 PE=4 SV=1	FALSE	0	65.867	13	9	95	8	1	852	96.2	6.33	High	High	Not Found	High	High	High	4.33662e+06	8.48057e+06		3.51737e+07	23869035	1.45387e+07
cbdbA1673	High	Master Protein	Q3ZW64	Uncharacterized protein OS=Dehalococcoides mccartyi (strain CBDB1) GN=cbdbA1673 PE=4 SV=1	FALSE	0	65.792	63	9	44	9	1	127	14.2	6.74	Not Found	High	Not Found	High	High	High				1.91916e+07	3.5819e+07	5.10006e+07
cbdbA81	High	Master Protein	Q3ZWF8	Uncharacterized protein OS=Dehalococcoides mccartyi (strain CBDB1) GN=rdhF PE=4 SV=1	FALSE	0	65.318	39	8	95	8	1	254	28	5.63	High	High	High	High	High	High	2.88019e+07	2.97008e+07	2.89512e+07	6.87044e+07	3.60242e+07	4.4214e+07
cbdbA2	High	Master Protein	Q3ZW89	GTPase Obg OS=Dehalococcoides mccartyi (strain CBDB1) GN=obg PE=3 SV=1	FALSE	0	65.03	31	11	67	11	1	424	46	6.06	High	High	High	High	High	High	7.82798e+06	7.91319e+06	3.19496e+07	3.7088e+07	4.00432e+07	3.41346e+07
cbdbA101	High	Master Protein	Q3ZWI7	Uncharacterized protein OS=Dehalococcoides mccartyi (strain CBDB1) GN=cbdbA101 PE=4 SV=1	FALSE	0	64.959	45	11	44	11	1	298	34.1	6.54	Not Found	High	High	High	High	High		2.74777e+06	8.32893e+06	3.54473e+07	4.30077e+07	1.5871e+07
cbdbA1588	High	Master Protein	Q3ZVY7	Putative reductive dehalogenase OS=Dehalococcoides mccartyi (strain CBDB1) GN=rdhA PE=4 SV=1	FALSE	0	64.728	38	13	25	13	1	495	55	6	Not Found	Not Found	Not Found	High	High	High				1.4543e+07	3.59966e+07	1.44774e+07
cbdbA505	High	Master Protein	Q3ZZR6	HAD-superfamily hydrolase, subfamily IA OS=Dehalococcoides mccartyi (strain CBDB1) GN=cbdbA505 PE=4 SV=1	FALSE	0	64.678	53	8	50	8	1	234	27.1	5.22	High	Not Found	High	High	High	High			3.17003e+06	8.32533e+07	88334796	72989961
cbdbA60	High	Master Protein	Q3ZWC6	DNA polymerase III delta subunit-related protein OS=Dehalococcoides mccartyi (strain CBDB1) GN=holA PE=4 SV=1	FALSE	0	64.661	43	12	49	12	1	344	37.7	8.79	High	High	High	High	High	High	1.86802e+06	2.20398e+06	5.28518e+06	1.84685e+07	2.20616e+07	1.02732e+07
cbdbA918	High	Master Protein	Q3ZXS5	Uncharacterized protein OS=Dehalococcoides mccartyi (strain CBDB1) GN=cbdbA918 PE=4 SV=1	FALSE	0	64.139	37	12	78	12	1	350	38.3	8.63	High	High	High	High	High	High	8.92442e+06	1.1011e+07	1.12049e+07	6.52815e+07	8.86819e+07	9.10444e+07
cbdbA522	High	Master Protein	Q3ZZV2	HDIG domain protein OS=Dehalococcoides mccartyi (strain CBDB1) GN=cbdbA522 PE=4 SV=1	FALSE	0	64.003	42	8	68	8	1	183	19.6	6.39	High	Not Found	Not Found	High	High	High	1.08261e+07			6.66091e+07	2.41517e+07	4.32169e+07
cbdbA286	High	Master Protein	Q3ZZA1	Transcriptional repressor NrdR OS=Dehalococcoides mccartyi (strain CBDB1) GN=nrdR PE=3 SV=1	FALSE	0	63.622	68	11	67	11	1	175	20.1	8.72	High	High	Not Found	High	High	High	6.11196e+06	7.01864e+06		4.76494e+07	6.02281e+07	5.85433e+07
cbdbA1688	High	Master Protein	Q3ZW53	Putative membrane bound regulatory protein,CprC OS=Dehalococcoides mccartyi (strain CBDB1) GN=cbdbA1688 PE=4 SV=1	FALSE	0	63.617	28	11	128	11	1	397	43.6	8.79	High	High	High	High	High	High	7.53831e+07	8.47545e+07	7.10569e+07	4.90878e+08	1.29544e+08	4.93948e+08
cbdbA1282	High	Master Protein	Q3ZYM6	Aspartyl/glutamyl-tRNA(Asn/Gln) amidotransferase subunit C OS=Dehalococcoides mccartyi (strain CBDB1) GN=gatC PE=3 SV=1	FALSE	0	63.572	84	9	134	9	1	95	10.9	5.27	High	High	High	High	High	High	5.92909e+07	6.77052e+07	4.99808e+07	2.45392e+08	2.10706e+08	1.88808e+08
cbdbA541	High	Master Protein	Q3ZWW5	UPF0109 protein cbdbA541 OS=Dehalococcoides mccartyi (strain CBDB1) GN=cbdbA541 PE=3 SV=1	FALSE	0	63.553	63	6	425	6	1	75	8.3	9.09	High	High	High	High	High	High	2.05902e+08	2.73094e+08	4.45793e+07	1.16378e+09	1.05908e+09	6.19468e+08
cbdbA908	High	Master Protein	Q3ZXT2	Copper-translocating P-type ATPase OS=Dehalococcoides mccartyi (strain CBDB1) GN=cbdbA908 PE=3 SV=1	FALSE	0	63.26	17	10	57	10	1	828	89	8.37	High	High	High	High	High	High	5.54665e+06	6.60646e+06	2.53744e+06	2.28612e+06	1.50906e+07	1.33361e+07
cbdbA169	High	Master Protein	Q3ZWN1	Putative [Fe] hydrogenase, HymA subunit OS=Dehalococcoides mccartyi (strain CBDB1) GN=hymA PE=4 SV=1	FALSE	0	62.872	63	7	134	7	1	155	17.2	4.64	High	High	High	High	High	High	3.94279e+07	2.31484e+07	5.27502e+07	1.52693e+08	2.13755e+08	1.08769e+08
cbdbA683	High	Master Protein	Q3ZX67	Putative [Fe] hydrogenase, HymA subunit OS=Dehalococcoides mccartyi (strain CBDB1) GN=hymA PE=4 SV=1	FALSE	0	62.7	63	9	129	9	1	157	16.9	7.88	High	High	High	High	High	High	4.41867e+07	5.61308e+07	1.07402e+08	2.77326e+08	3.67174e+08	1.0823e+08
cbdbA1241	High	Master Protein	Q3ZYL2	Fasciclin domain protein OS=Dehalococcoides mccartyi (strain CBDB1) GN=cbdbA1241 PE=4 SV=1	FALSE	0	62.561	73	8	121	8	1	134	14.6	5.77	High	High	High	High	High	High	1.56466e+07	1.77134e+07	2.58578e+07	1.53912e+08	1.97048e+08	1.4052e+08
cbdbA612	High	Master Protein	Q3ZX25	Sensor histidine kinase OS=Dehalococcoides mccartyi (strain CBDB1) GN=cbdbA612 PE=4 SV=1	FALSE	0	62.542	17	13	42	12	1	852	96.5	6.3	Not Found	Not Found	Not Found	High	High	High				1.29932e+07	2.05236e+07	8.82355e+06
cbdbA103	High	Master Protein	Q3ZWI5	Uncharacterized protein OS=Dehalococcoides mccartyi (strain CBDB1) GN=cbdbA103 PE=4 SV=1	FALSE	0	62.45	37	11	35	11	1	384	44.3	6.47	Not Found	High	Not Found	High	High	High		1.42306e+06		1.63715e+07	1.31511e+07	3.608e+07
cbdbA26	High	Master Protein	Q3ZWA2	Uncharacterized protein OS=Dehalococcoides mccartyi (strain CBDB1) GN=cbdbA26 PE=4 SV=1	FALSE	0	61.706	38	7	47	7	1	250	28.7	7.01	High	High	High	High	High	High	2.02368e+06	6.92963e+06	3.05612e+06	3.13021e+07	6.37623e+07	2.64211e+07
cbdbA365	High	Master Protein	Q3ZZD7	Putative deoxycytidylate deaminase OS=Dehalococcoides mccartyi (strain CBDB1) GN=cbdbA365 PE=4 SV=1	FALSE	0	61.424	74	8	117	8	1	157	17.2	7.42	High	High	High	High	High	High	8.56264e+06	3.33803e+07	3.07608e+07	1.57915e+08	3.17744e+08	1.22478e+08
cbdbA633	High	Master Protein	Q3ZX60	ABC-type cobalamin/Fe3+-siderophores transport system, periplasmic component OS=Dehalococcoides mccartyi (strain CBDB1) GN=fecB PE=4 SV=1	FALSE	0	61.165	31	9	214	9	1	337	35.5	4.69	High	High	High	High	High	High	6.35131e+07	7.64955e+07	7.56406e+07	5.0662e+08	4.15578e+08	2.32461e+08
cbdbA1244	High	Master Protein	Q3ZYL1	Uncharacterized protein OS=Dehalococcoides mccartyi (strain CBDB1) GN=cbdbA1244 PE=4 SV=1	FALSE	0	60.744	53	9	73	9	1	187	21.1	8.29	High	High	High	High	High	High	4.80604e+06	5.40691e+06	6.64727e+06	4.86788e+07	9.25641e+07	2.57424e+07
cbdbA646	High	Master Protein	Q3ZX49	Sensor histidine kinase OS=Dehalococcoides mccartyi (strain CBDB1) GN=cbdbA646 PE=4 SV=1	FALSE	0	60.145	22	7	54	7	1	381	43.3	6.57	High	High	High	High	High	High	7.42486e+06	1.03053e+07	1.16332e+07	3.54155e+07	5.20977e+07	4.06852e+07
cbdbA904	High	Master Protein	Q3ZXT6	CBS domain protein OS=Dehalococcoides mccartyi (strain CBDB1) GN=cbdbA904 PE=4 SV=1	FALSE	0	59.917	67	9	168	9	1	162	17.9	5.58	High	High	High	High	High	High	6.27352e+07	7.81204e+07	9.99823e+07	4.61608e+08	4.94434e+08	3.83723e+08
cbdbA963	High	Master Protein	Q3ZXX1	Glycosyl transferase, group 1 family protein OS=Dehalococcoides mccartyi (strain CBDB1) GN=cbdbA963 PE=4 SV=1	FALSE	0	59.655	37	10	34	10	1	405	44.8	6.11	High	High	Not Found	High	High	High	4.77417e+06	6.39526e+06		3.59816e+07	2.99069e+07	2.01036e+07
cbdbA499	High	Master Protein	Q3ZZS0	Glucose-1-phosphate thymidylyltransferase OS=Dehalococcoides mccartyi (strain CBDB1) GN=rfbA PE=4 SV=1	FALSE	0	59.632	39	11	112	11	1	400	42.6	5.6	High	High	High	High	High	High	9.55242e+06	1.09066e+07	1.21406e+07	1.05457e+08	9.42274e+07	6.17081e+07
cbdbA159	High	Master Protein	Q3ZWN9	Sensor histidine kinase OS=Dehalococcoides mccartyi (strain CBDB1) GN=cbdbA159 PE=4 SV=1	FALSE	0	59.18	21	10	51	10	1	581	63.2	6.1	High	High	High	High	High	High	4.45377e+06	8.08581e+06	4.36059e+06	2.35127e+07	1.30003e+07	2.0363e+07
cbdbA1619	High	Master Protein	Q3ZW10	Transcriptional regulator, MarR family OS=Dehalococcoides mccartyi (strain CBDB1) GN=rdhR PE=4 SV=1	FALSE	0	59.077	55	9	25	9	1	174	20	9.28	High	High	High	High	High	High	2.79583e+06			1.48673e+07	2.54159e+07	1.78227e+07
cbdbA1320	High	Master Protein	Q3ZYP0	Uncharacterized protein OS=Dehalococcoides mccartyi (strain CBDB1) GN=cbdbA1320 PE=4 SV=1	FALSE	0	58.885	71	7	127	7	1	49	5.6	9.73	High	High	High	High	High	High	1.31459e+08	1.5995e+08	1.45841e+08	6.26772e+08	8.95359e+08	4.9287e+08
cbdbA1576	High	Master Protein	Q3ZVU9	Transcriptional regulator, MarR family OS=Dehalococcoides mccartyi (strain CBDB1) GN=rdhR PE=4 SV=1	FALSE	0	58.875	61	9	58	9	1	158	18.6	8.98	High	High	High	High	High	High	3.86313e+07	5.00196e+07	2.08828e+07	2.27449e+08	1.96949e+08	1.11348e+08
cbdbA1412	High	Master Protein	Q3ZYZ8	Excisionase family DNA binding protein OS=Dehalococcoides mccartyi (strain CBDB1) GN=cbdbA1412 PE=4 SV=1	FALSE	0	58.833	77	8	125	8	1	137	15.5	5.36	High	High	High	High	High	High	8.26401e+07	8.66989e+07	9.26594e+07	3.66955e+08	4.56981e+08	2.36432e+08
cbdbA1694	High	Master Protein	Q3ZW48	Twin-arginine translocation protein, TatA OS=Dehalococcoides mccartyi (strain CBDB1) GN=E PE=4 SV=1	FALSE	0	58.654	35	5	75	5	1	78	8.6	9.28	High	High	High	High	High	High	2.09686e+07	3.97558e+07	5.85625e+06	6.09615e+07	6.68312e+07	9.20313e+07
cbdbA447	High	Master Protein	Q3ZZL6	50S ribosomal protein L29 OS=Dehalococcoides mccartyi (strain CBDB1) GN=rpmC PE=3 SV=1	FALSE	0	58.607	60	6	126	5	1	65	7.8	9.98	High	High	High	High	High	High	1.40312e+07	3.78567e+07	1.70196e+07	3.09417e+08	3.85711e+08	3.06012e+08
cbdbA845	High	Master Protein	Q3ZXM4	Hydrogenase subunit HymA OS=Dehalococcoides mccartyi (strain CBDB1) GN=cbdbA845 PE=4 SV=1	FALSE	0	58.369	60	10	52	10	1	161	17.8	7.33	Not Found	High	High	High	High	High		2.50452e+06	8.9559e+06	1.14059e+08	1.03564e+08	1.25149e+07
cbdbA543	High	Master Protein	Q3ZWY6	Peptide chain release factor 2 OS=Dehalococcoides mccartyi (strain CBDB1) GN=prfB PE=4 SV=1	FALSE	0	57.786	36	10	71	10	1	356	39.9	5.36	High	High	High	High	High	High	6.07021e+06	9.06365e+06	6.98154e+06	5.37497e+07	3.73969e+07	4.02192e+07
cbdbA1268	High	Master Protein	Q3ZYN7	Dephospho-CoA kinase OS=Dehalococcoides mccartyi (strain CBDB1) GN=coaE PE=3 SV=1	FALSE	0	57.685	57	10	35	10	1	198	22.2	9.01	Not Found	High	High	High	High	High		2.56561e+06	4.51987e+06	3.14595e+07	2.83639e+07	3.6459e+07
cbdbA1271	High	Master Protein	Q3ZYN4	50S ribosomal protein L27 OS=Dehalococcoides mccartyi (strain CBDB1) GN=rpmA PE=3 SV=1	FALSE	0	57.564	63	9	202	9	1	84	9.1	10.17	High	High	High	High	High	High	2.22736e+08	1.86227e+08	1.60971e+08	7.29916e+08	7.79317e+08	6.29288e+08
cbdbA168	High	Master Protein	Q3ZWN2	Arsenate reductase OS=Dehalococcoides mccartyi (strain CBDB1) GN=arsC PE=4 SV=1	FALSE	0	57.113	84	8	63	8	1	137	14.7	5.27	High	High	High	High	High	High	1.52971e+07	2.82706e+07	9.53745e+06	6.72046e+07	5.48391e+07	8.82485e+07
cbdbA1239	High	Master Protein	Q3ZYL4	Universal stress protein family OS=Dehalococcoides mccartyi (strain CBDB1) GN=cbdbA1239 PE=4 SV=1	FALSE	0	56.824	55	6	138	6	1	108	11.8	5.48	High	High	High	High	High	High	74152789	7.81632e+07	260729	2.40875e+08	2.97766e+08	2.31872e+08
cbdbA1451	High	Master Protein	Q3ZZ10	Tryptophan synthase alpha chain OS=Dehalococcoides mccartyi (strain CBDB1) GN=trpA PE=3 SV=1	FALSE	0	56.23	40	7	100	7	1	255	27.6	5.44	High	High	High	High	High	High	5.37458e+07	4.91201e+07	8.61114e+07	3.0484e+08	3.44755e+08	2.31559e+08
[truncated: 385 more rows]

## Sheet: D
														Identifications (High = identified)						MS1 areas
[truncated: 218 more rows]
