# Supplementary material for: Changes of the Proteome and Acetylome during Transition into the Stationary Phase in the Organohalide-Respiring Dehalococcoides mccartyi Strain CBDB1
Source: Microorganisms. 2021 Feb 12;9(2):365. doi: 10.3390/microorganisms9020365 (PMC7918482; doi:10.3390/microorganisms9020365)
Supplement: Supplementary file 1 [file microorganisms-09-00365-s001.zip › Table_S3_Exp2_protein_abundances.xlsx]

## Sheet: Manual
Table S4. This table collects the basic proteomic datasets from all samples of experiment 2. Sheet A lists the protein abundances of the inoculum (corresponding to a four week-old stationary phase culture), the culture incubated for five days in the absence of 1,2,3-TCB (minus TCB), the cells of the exponential and the stationary growth phase. Protein abundances correspond to the average of the t…
Id. = protein was identified in ≥1 triplicates or quantified in 1 triplicate
n.d. = protein was not identified in any of the replicates

## Sheet: A
Accession	locus tag	Description	protein abundance (log10 fold change of median)				standard deviation				Pathway
			Proteome				Proteome
			ino-culum	minus TCB	exp	stat	ino-culum	minus TCB	exp	stat
Q3ZXB4	cbdbA727	Uncharacterized protein OS=Dehalococcoides mccartyi (strain CBDB1) GN=cbdbA727 PE=4 SV=1	2.35977	3.04565	3.443	2.71645	0.162851	0.587258	0.0815948	0.625668
Q3ZYW8	cbdbA1393	60 kDa chaperonin OS=Dehalococcoides mccartyi (strain CBDB1) GN=groL PE=3 SV=1	3.2465	3.69184	3.89154	3.52759	0.0924872	0.322075	0.062757	0.520199	Folding, sorting and degradation; Translation; Transport and catabolism
Q3ZX00	cbdbA587	DNA-directed RNA polymerase subunit beta' OS=Dehalococcoides mccartyi (strain CBDB1) GN=rpoC PE=3 SV=1	2.15549	2.8004	2.82487	2.29753	0.0496209	0.284605	0.147275	0.442992	Nucleotide metabolism; Replication and repair; Transcription
Q3ZX01	cbdbA586	DNA-directed RNA polymerase subunit beta OS=Dehalococcoides mccartyi (strain CBDB1) GN=rpoB PE=3 SV=1	2.45774	2.86089	2.91479	2.32998	0.0945582	0.231567	0.105471	0.468302	Nucleotide metabolism; Replication and repair; Transcription
Q3ZY60	cbdbA1077	Acetyl-CoA synthetase OS=Dehalococcoides mccartyi (strain CBDB1) GN=cbdbA1077 PE=4 SV=1	2.86363	3.05529	3.09463	2.7742	0.0924439	0.103635	0.088116	0.342155
Q3ZZG5	cbdbA388	Protein translocase subunit SecA OS=Dehalococcoides mccartyi (strain CBDB1) GN=secA PE=3 SV=1	2.11168	2.62333	2.59141	2.14552	0.0253231	0.337253	0.080985	0.427934	Cellular community - prokaryotes; Folding, sorting and degradation; Membrane transport
Q3ZYV1	cbdbA1358	Chaperone protein DnaK OS=Dehalococcoides mccartyi (strain CBDB1) GN=dnaK PE=3 SV=1	3.34611	3.40915	3.44533	3.31107	0.0683888	0.0261782	0.0404082	0.224087	Folding, sorting and degradation; Membrane transport; Translation; Transport and catabolism
Q3ZWQ7	cbdbA195	Formate dehydrogenase, major subunit OS=Dehalococcoides mccartyi (strain CBDB1) GN=OmeA PE=4 SV=1	3.06346	3.28285	3.41451	3.20613	0.12165	0.125378	0.0583563	0.0622956	Carbohydrate metabolism; Energy metabolism
Q3ZWG0	cbdbA80	Putative reductive dehalogenase OS=Dehalococcoides mccartyi (strain CBDB1) GN=rdhA PE=4 SV=1	3.67914	3.85299	3.36865	3.76608	0.805763	0.268718	0.496347	0.345711
Q3ZZU6	cbdbA529	Phosphoenolpyruvate synthase OS=Dehalococcoides mccartyi (strain CBDB1) GN=ppsA PE=3 SV=1	2.59529	2.86585	2.90967	2.73978	0.232555	0.242425	0.060603	0.125975	Carbohydrate metabolism; Energy metabolism
Q3ZYT8	cbdbA1374	ATP-dependent Clp protease, ATP-binding subunit ClpC OS=Dehalococcoides mccartyi (strain CBDB1) GN=clpA PE=3 SV=1	2.50193	2.69361	2.67077	2.49357	0.206396	0.0619148	0.111273	0.208829	Folding, sorting and degradation
Q3ZXB3	cbdbA728	Uncharacterized protein OS=Dehalococcoides mccartyi (strain CBDB1) GN=cbdbA728 PE=4 SV=1	2.1486	2.7094	3.17172	1.96936	0.147084	0.543881	0.0821135	0.97755
Q3ZWC3	cbdbA65	Alanine--tRNA ligase OS=Dehalococcoides mccartyi (strain CBDB1) GN=alaS PE=3 SV=1	2.33572	2.52747	2.46298	2.21987	0.169941	0.14024	0.033892	0.41804	Amino acid metabolism; Translation
Q3ZWL5	cbdbA129	Ni/Fe hydrogenase large subunit OS=Dehalococcoides mccartyi (strain CBDB1) GN=hupL PE=3 SV=1	3.13865	3.27967	3.20401	3.09398	0.105185	0.0661975	0.0493115	0.142695	Xenobiotics biodegradation and metabolism
Q3ZWF5	cbdbA84	Putative reductive dehalogenase OS=Dehalococcoides mccartyi (strain CBDB1) GN=rdhA PE=4 SV=1	3.67894	3.67586	3.624	3.25895	0.0988566	0.149324	0.154655	0.602751
Q3ZXX3	cbdbA960	Elongation factor Tu OS=Dehalococcoides mccartyi (strain CBDB1) GN=tuf PE=3 SV=1	3.60066	3.7578	3.60341	3.41826	0.0457924	0.157651	0.0410977	0.456226	Translation; Transport and catabolism
Q3ZX66	cbdbA684	Putative [Fe] hydrogenase, HymB subunit OS=Dehalococcoides mccartyi (strain CBDB1) GN=hymB PE=4 SV=1	2.61738	3.00162	3.05685	2.50161	0.249212	0.041505	0.0947628	0.579947	Energy metabolism
Q3ZYA7	cbdbA1130	Translation elongation factor G OS=Dehalococcoides mccartyi (strain CBDB1) GN=fusA PE=4 SV=1	1.99207	2.609	2.67869	2.24684	0.308143	0.123217	0.0756138	0.404192	Translation
Q3ZZM6	cbdbA437	Elongation factor G OS=Dehalococcoides mccartyi (strain CBDB1) GN=fusA PE=3 SV=1	2.46567	2.86799	2.95254	2.63128	0.0648726	0.195353	0.0263005	0.233204	Translation
Q3ZZX1	cbdbA1728	DNA gyrase subunit A OS=Dehalococcoides mccartyi (strain CBDB1) GN=gyrA PE=3 SV=1	2.20679	2.65593	2.74498	2.13848	0.153738	0.231243	0.0923308	0.534019	Replication and repair
Q3ZYF7	cbdbA1187	DAK2 domain protein OS=Dehalococcoides mccartyi (strain CBDB1) GN=cbdbA1187 PE=4 SV=1	2.25774	2.51738	2.32679	2.16753	0.188416	0.201827	0.170354	0.277795	Poorly characterized
Q3ZWB9	cbdbA70	ATP-dependent Clp protease, ATP-binding subunit OS=Dehalococcoides mccartyi (strain CBDB1) GN=clpC PE=3 SV=1	1.99558	2.67876	2.44476	2.08097	0.420783	0.0435979	0.24782	0.490572	Folding, sorting and degradation
Q3ZXV6	cbdbA932	Polyribonucleotide nucleotidyltransferase OS=Dehalococcoides mccartyi (strain CBDB1) GN=pnp PE=3 SV=1	2.42078	2.84753	3.02476	2.50105	0.100721	0.419808	0.00747713	0.43113	Folding, sorting and degradation; Nucleotide metabolism; Translation
Q3ZYE3	cbdbA1142	Uncharacterized protein OS=Dehalococcoides mccartyi (strain CBDB1) GN=cbdbA1142 PE=4 SV=1	2.85405	3.11393	3.30391	2.97407	0.14432	0.274181	0.0944955	0.172224	Carbohydrate metabolism; Energy metabolism
Q3ZWM9	cbdbA171	Putative [Fe] hydrogenase, large subunit HymC OS=Dehalococcoides mccartyi (strain CBDB1) GN=hymC PE=4 SV=1	2.19934	2.73247	2.78904	2.2852	0.105159	0.324995	0.155325	0.446207	Metabolism
Q3ZWK4	cbdbA143	Pyridine nucleotide-disulphide oxidoreductase family protein OS=Dehalococcoides mccartyi (strain CBDB1) GN=cbdbA143 PE=4 SV=1	2.09274	2.61346	2.82357	2.25516	0.143536	0.512561	0.141788	0.470345
Q3ZW82	cbdbA1702	Ribonuclease Y OS=Dehalococcoides mccartyi (strain CBDB1) GN=rny PE=3 SV=1	1.52564	2.37907	2.59374	Id.	0.0545557	0.667417	0.197355		Folding, sorting and degradation; Translation
Q3ZWZ1	cbdbA597	Hydrogenase, group 3, VhuA subunit OS=Dehalococcoides mccartyi (strain CBDB1) GN=cbdbA597 PE=3 SV=1	2.70874	2.97849	2.9531	2.78732	0.138998	0.0919721	0.0520819	0.220563	Metabolism
Q3ZY09	cbdbA1024	Conserved domain protein OS=Dehalococcoides mccartyi (strain CBDB1) GN=cbdbA1024 PE=4 SV=1	1.99628	2.6691	2.84116	2.34255	0.363253	0.458785	0.0416777	0.457013
Q3ZY23	cbdbA1008	Tryptophan synthase beta chain OS=Dehalococcoides mccartyi (strain CBDB1) GN=trpB PE=3 SV=1	3.22931	3.30231	3.21779	3.10507	0.340443	0.325984	0.0136148	0.348099	Amino acid metabolism
Q3ZVV7	cbdbA1568	Glutamine synthetase OS=Dehalococcoides mccartyi (strain CBDB1) GN=glnA PE=3 SV=1	3.13674	3.25819	2.88845	2.78058	0.32201	0.239832	0.18827	0.597431	Amino acid metabolism; Carbohydrate metabolism; Cell growth and death; Energy metabolism; Signal transduction; Transport and catabolism
Q3ZX83	cbdbA664	Trigger factor OS=Dehalococcoides mccartyi (strain CBDB1) GN=tig PE=3 SV=1	1.96428	2.68113	2.7544	2.19447	0.086318	0.514767	0.0871151	0.466003	Genetic information processing
Q3ZWQ1	cbdbA202	Leucine--tRNA ligase OS=Dehalococcoides mccartyi (strain CBDB1) GN=leuS PE=3 SV=1	2.1723	2.22413	2.2321	2.15242	0.125535	0.0378626	0.0738054	0.0734836	Amino acid metabolism; Translation
Q3ZZA0	cbdbA287	Ribonucleotide reductase OS=Dehalococcoides mccartyi (strain CBDB1) GN=nrdA PE=4 SV=1	1.91139	2.61933	2.65618	2.20675	0.318557	0.383078	0.194269	0.654923	Nucleotide metabolism; Replication and repair
Q3ZZD2	cbdbA308	Phenylalanine--tRNA ligase beta subunit OS=Dehalococcoides mccartyi (strain CBDB1) GN=pheT PE=3 SV=1	2.23704	2.51228	2.29868	2.29804	0.0909944	0.10198	0.0748399	0.0593521	Amino acid metabolism; Translation
Q3ZZD0	cbdbA310	Proline--tRNA ligase OS=Dehalococcoides mccartyi (strain CBDB1) GN=proS PE=3 SV=1	2.08956	2.41888	2.60743	2.2439	0.0755889	0.411157	0.0831033	0.299982	Amino acid metabolism; Translation
Q3ZXP7	cbdbA846	Hydrogenase subunit HymB OS=Dehalococcoides mccartyi (strain CBDB1) GN=cbdbA846 PE=4 SV=1	2.35347	2.53322	2.51188	2.40145	0.0368552	0.0734954	0.082195	0.343676	Energy metabolism
Q3ZWW6	cbdbA568	GTPase domain protein OS=Dehalococcoides mccartyi (strain CBDB1) GN=cbdbA568 PE=4 SV=1	2.96372	3.20569	3.13378	3.0237	0.123727	0.154896	0.108491	0.20766
Q3ZXI2	cbdbA811	Ketol-acid reductoisomerase OS=Dehalococcoides mccartyi (strain CBDB1) GN=ilvC PE=3 SV=1	2.94751	3.26635	3.23423	2.91378	0.0290301	0.0114285	0.214579	0.395775	Amino acid metabolism; Metabolism of cofactors and vitamins
Q3ZYB7	cbdbA1118	Carbamoyl-phosphate synthase, large subunit OS=Dehalococcoides mccartyi (strain CBDB1) GN=carB PE=3 SV=1	2.00596	2.29644	2.38164	1.89227	0.266738	0.463762	0.123753	0.339544	Amino acid metabolism; Nucleotide metabolism
Q3ZYX9	cbdbA1381	Bifunctional purine biosynthesis protein PurH OS=Dehalococcoides mccartyi (strain CBDB1) GN=purH PE=3 SV=1	2.59758	2.87639	2.89992	2.65523	0.25021	0.152163	0.122987	0.0728757	Drug resistance; Metabolism of cofactors and vitamins; Nucleotide metabolism; Transport and catabolism
Q3ZXU1	cbdbA949	N utilization substance protein A OS=Dehalococcoides mccartyi (strain CBDB1) GN=nusA PE=3 SV=1	1.88826	2.38505	2.6728	1.97153	0.17941	0.551208	0.0513967	0.660068	Transcription; Translation
Q3ZZT7	cbdbA538	ATP synthase subunit beta OS=Dehalococcoides mccartyi (strain CBDB1) GN=atpD PE=3 SV=1	2.73562	3.27648	3.27575	2.73512	0.0722385	0.324728	0.144135	0.512134	Energy metabolism
Q3ZX05	cbdbA580	D-3-phosphoglycerate dehydrogenase OS=Dehalococcoides mccartyi (strain CBDB1) GN=serA PE=3 SV=1	2.94696	2.98172	2.84573	2.79104	0.0670229	0.0549904	0.0202615	0.289952	Amino acid metabolism; Energy metabolism; Transport and catabolism
Q3ZX75	cbdbA674	DNA topoisomerase 1 OS=Dehalococcoides mccartyi (strain CBDB1) GN=topA PE=3 SV=1	2.28011	2.66796	2.58321	2.42035	0.0194882	0.106022	0.0787203	0.212688	Replication and repair
Q3ZXJ6	cbdbA794	Iron-regulated ABC transporter, subunit SufB-related OS=Dehalococcoides mccartyi (strain CBDB1) GN=sufB PE=4 SV=1	1.69886	2.49444	2.85944	1.89638	0.10434	0.447949	0.108271	0.615815	Poorly characterized
Q3ZXI3	cbdbA808	2-isopropylmalate synthase OS=Dehalococcoides mccartyi (strain CBDB1) GN=leuA PE=3 SV=1	2.42219	2.55757	2.70338	2.3919	0.0833328	0.0459967	0.0871311	0.24008	Amino acid metabolism; Carbohydrate metabolism
Q3ZXU7	cbdbA943	Myo-inositol-1-phosphate synthase family protein OS=Dehalococcoides mccartyi (strain CBDB1) GN=cbdbA943 PE=4 SV=1	2.69392	3.18478	3.26695	2.88643	0.159939	0.373926	0.183661	0.337549	Biosynthesis of other secondary metabolites; Carbohydrate metabolism
Q3ZZN0	cbdbA432	Phospho-2-dehydro-3-deoxyheptonate aldolase OS=Dehalococcoides mccartyi (strain CBDB1) GN=aroF PE=4 SV=1	3.51212	3.52006	3.37674	3.26449	0.274892	0.312417	0.124966	0.566073	Amino acid metabolism
Q3ZYU3	cbdbA1369	Transcription termination factor Rho OS=Dehalococcoides mccartyi (strain CBDB1) GN=rho PE=3 SV=1	2.5758	2.71826	2.63361	2.46054	0.0884659	0.153663	0.0421818	0.145215	Folding, sorting and degradation; Transcription; Translation
Q3ZZG9	cbdbA384	Valine--tRNA ligase OS=Dehalococcoides mccartyi (strain CBDB1) GN=valS PE=3 SV=1	1.85964	2.3099	2.32566	2.19696	0.122314	0.17365	0.116445	0.162914	Amino acid metabolism; Translation
Q3ZW87	cbdbA4	DNA gyrase subunit B OS=Dehalococcoides mccartyi (strain CBDB1) GN=gyrB PE=3 SV=1	2.30198	2.71426	2.68168	2.04886	0.30195	0.102467	0.0826055	0.572596	Replication and repair
Q3ZX11	cbdbA573	Enolase OS=Dehalococcoides mccartyi (strain CBDB1) GN=eno PE=3 SV=1	2.24838	2.69356	2.80517	2.39037	0.187178	0.165748	0.10965	0.126282	Carbohydrate metabolism; Energy metabolism; Folding, sorting and degradation; Signal transduction; Translation; Transport and catabolism
Q3ZZF9	cbdbA339	ATP-dependent zinc metalloprotease FtsH OS=Dehalococcoides mccartyi (strain CBDB1) GN=ftsH PE=3 SV=1	1.89367	2.53188	2.68632	2.02278	0.11267	0.521947	0.114231	0.475407	Enzyme families; Folding, sorting and degradation
Q3ZZN1	cbdbA431	3-dehydroquinate synthase OS=Dehalococcoides mccartyi (strain CBDB1) GN=aroB PE=3 SV=1	2.74055	3.1164	3.32628	2.81571	0.150965	0.156825	0.0401274	0.463342	Amino acid metabolism
Q3ZYB0	cbdbA1126	Acetyl-CoA synthetase OS=Dehalococcoides mccartyi (strain CBDB1) GN=acs PE=4 SV=1	2.8739	3.10486	2.98933	2.82074	0.113733	0.110446	0.0681989	0.406667	Carbohydrate metabolism; Energy metabolism; Lipid metabolism
Q3ZXB5	cbdbA726	Threonine--tRNA ligase OS=Dehalococcoides mccartyi (strain CBDB1) GN=thrS PE=3 SV=1	2.09583	2.34089	2.60334	1.93248	0.334431	0.358703	0.115582	0.496682	Amino acid metabolism; Translation
Q3ZZN7	cbdbA476	S-adenosylmethionine synthase OS=Dehalococcoides mccartyi (strain CBDB1) GN=metK PE=3 SV=1	2.97934	3.17474	3.14515	2.75724	0.0920127	0.0564224	0.0362965	0.298869	Amino acid metabolism
Q3ZWL3	cbdbA131	Putative Ni/Fe hydrogenase, iron-sulfur cluster-binding subunit OS=Dehalococcoides mccartyi (strain CBDB1) GN=hupX PE=4 SV=1	2.69645	2.99886	3.06754	2.91655	0.302513	0.181386	0.126868	0.169247	Carbohydrate metabolism; Energy metabolism
Q3ZZC1	cbdbA322	30S ribosomal protein S2 OS=Dehalococcoides mccartyi (strain CBDB1) GN=rpsB PE=3 SV=1	2.62019	3.23978	3.0636	2.63759	0.823014	0.169008	0.0891989	0.746406	Translation
Q3ZXM1	cbdbA821	Adenylosuccinate lyase OS=Dehalococcoides mccartyi (strain CBDB1) GN=purB PE=3 SV=1	1.81512	2.30607	2.42317	2.00183	0.0246567	0.291255	0.0586494	0.314368	Amino acid metabolism; Nucleotide metabolism
Q3ZZP6	cbdbA466	DNA-directed RNA polymerase subunit alpha OS=Dehalococcoides mccartyi (strain CBDB1) GN=rpoA PE=3 SV=1	2.67153	2.94594	2.91954	2.6599	0.106979	0.209587	0.0998624	0.25762	Nucleotide metabolism; Replication and repair; Transcription
Q3ZXU3	cbdbA947	Translation initiation factor IF-2 OS=Dehalococcoides mccartyi (strain CBDB1) GN=infB PE=3 SV=1	1.93659	2.0866	2.30261	1.97885	0.149849	0.277714	0.014977	0.429377	Translation
Q3ZZG3	cbdbA390	Serine hydroxymethyltransferase OS=Dehalococcoides mccartyi (strain CBDB1) GN=glyA PE=3 SV=1	1.89831	2.63026	2.76213	2.41764	0.273132	0.479837	0.0815372	0.362399	Amino acid metabolism; Carbohydrate metabolism; Drug resistance; Energy metabolism; Metabolism of cofactors and vitamins; Metabolism of other amino acids
Q3ZXI8	cbdbA803	2-isopropylmalate synthase OS=Dehalococcoides mccartyi (strain CBDB1) GN=cbdbA803 PE=3 SV=1	2.24226	2.65571	2.745	2.31077	0.125101	0.207184	0.024915	0.321736	Amino acid metabolism; Carbohydrate metabolism
Q3ZXV0	cbdbA939	Adenylosuccinate synthetase OS=Dehalococcoides mccartyi (strain CBDB1) GN=purA PE=3 SV=1	2.43322	2.67501	2.43079	2.30945	0.347395	0.103423	0.0586321	0.544905	Amino acid metabolism; Nucleotide metabolism
Q3ZX07	cbdbA578	Uncharacterized protein OS=Dehalococcoides mccartyi (strain CBDB1) GN=cbdbA578 PE=4 SV=1	2.52964	2.74377	2.80452	2.70371	0.111459	0.20198	0.0867284	0.0961141
Q3ZX45	cbdbA652	Carbon monoxide dehydrogenase, alpha subunit OS=Dehalococcoides mccartyi (strain CBDB1) GN=codH PE=4 SV=1	2.29817	2.6151	2.67679	2.33678	0.103987	0.0480984	0.100646	0.348809	Energy metabolism
Q3ZZ78	cbdbA1520	Uncharacterized protein OS=Dehalococcoides mccartyi (strain CBDB1) GN=cbdbA1520 PE=4 SV=1	2.26537	2.63255	2.80042	2.50562	0.210342	0.191739	0.101948	0.190216	Transport and catabolism
Q3ZZT9	cbdbA536	ATP synthase subunit alpha OS=Dehalococcoides mccartyi (strain CBDB1) GN=atpA PE=3 SV=1	2.5414	3.20308	3.2791	2.94512	0.0557838	0.350078	0.0427001	0.290276	Energy metabolism
Q3ZYW9	cbdbA1392	10 kDa chaperonin OS=Dehalococcoides mccartyi (strain CBDB1) GN=groS PE=3 SV=1	2.53994	3.29461	3.5053	2.95002	0.26243	0.660438	0.204807	0.470684	Folding, sorting and degradation; Translation
Q3ZWI1	cbdbA106	Restriction enzymes type I helicase subunit OS=Dehalococcoides mccartyi (strain CBDB1) GN=cbdbA106 PE=4 SV=1	1.37644	2.00923	1.91625	1.66493	0.247555	0.0956928	0.0715517	0.138075	Transport and catabolism
Q3ZZI4	cbdbA393	DNA translocase FtsK OS=Dehalococcoides mccartyi (strain CBDB1) GN=ftsK PE=4 SV=1	1.71783	2.37742	2.28837	2.06135	0.140636	0.147733	0.130188	0.170246	Replication and repair
Q3ZZN6	cbdbA477	Adenosylhomocysteinase OS=Dehalococcoides mccartyi (strain CBDB1) GN=ahcY PE=3 SV=1	2.58141	2.987	3.01066	2.67179	0.0810283	0.229238	0.0078874	0.273031	Amino acid metabolism; Enzyme families; Transport and catabolism
Q3ZZM1	cbdbA442	50S ribosomal protein L2 OS=Dehalococcoides mccartyi (strain CBDB1) GN=rplB PE=3 SV=1	3.01512	3.25681	3.15667	3.01841	0.18431	0.051461	0.0594319	0.224428	Translation
Q3ZY35	cbdbA1050	Glutamine synthetase, type I OS=Dehalococcoides mccartyi (strain CBDB1) GN=glnA PE=3 SV=1	2.46574	2.58768	2.64173	2.36377	0.639298	0.0730815	0.127138	0.549146	Amino acid metabolism; Carbohydrate metabolism; Cell growth and death; Energy metabolism; Signal transduction; Transport and catabolism
Q3ZZL8	cbdbA445	30S ribosomal protein S3 OS=Dehalococcoides mccartyi (strain CBDB1) GN=rpsC PE=3 SV=1	2.73237	2.99837	3.03748	2.38301	0.248326	0.22993	0.0702675	0.526057	Translation
Q3ZYV0	cbdbA1359	Protein GrpE OS=Dehalococcoides mccartyi (strain CBDB1) GN=grpE PE=3 SV=1	1.59515	2.58921	2.99204	2.1381	0.317277	0.597565	0.107558	1.05459	Folding, sorting and degradation; Translation
Q3ZYU4	cbdbA1368	Conserved domain protein OS=Dehalococcoides mccartyi (strain CBDB1) GN=cbdbA1368 PE=4 SV=1	4.05247	3.91163	3.64994	4.12513	0.0940912	0.089505	0.143408	0.0528078
Q3ZZV3	cbdbA521	UvrABC system protein A OS=Dehalococcoides mccartyi (strain CBDB1) GN=uvrA PE=3 SV=1	1.82719	1.98222	2.11565	1.71623	0.345019	0.356049	0.201154	0.20786	Replication and repair
Q3ZXC3	cbdbA719	Phosphoglycerate kinase OS=Dehalococcoides mccartyi (strain CBDB1) GN=pgk PE=3 SV=1	1.99569	2.56976	2.67897	2.23828	0.127111	0.322013	0.0725044	0.232821	Carbohydrate metabolism; Energy metabolism; Transport and catabolism
Q3ZXC4	cbdbA718	Putative phosphoglycerate mutase,2,3-bisphosphoglycerate-independent OS=Dehalococcoides mccartyi (strain CBDB1) GN=cbdbA718 PE=4 SV=1	2.2197	2.51663	2.60624	2.23739	0.053845	0.149846	0.0554898	0.279845	Amino acid metabolism; Carbohydrate metabolism; Energy metabolism
Q3ZWB3	cbdbA11	Branched-chain amino acid aminotransferase OS=Dehalococcoides mccartyi (strain CBDB1) GN=ilvE PE=3 SV=1	2.45744	2.59583	2.70719	2.39907	0.0761002	0.0333851	0.0968114	0.115875	Amino acid metabolism; Metabolism of cofactors and vitamins
Q3ZX69	cbdbA681	Pyruvic-ferredoxin oxidoreductase, alpha subunit OS=Dehalococcoides mccartyi (strain CBDB1) GN=porA PE=4 SV=1	2.7938	2.87909	2.77634	2.70001	0.0735819	0.0628421	0.0757608	0.204128	Carbohydrate metabolism; Energy metabolism; Xenobiotics biodegradation and metabolism
Q3ZXS3	cbdbA901	Acyl-CoA synthetase (AMP-forming) / AMP-acid ligase OS=Dehalococcoides mccartyi (strain CBDB1) GN=cbdbA901 PE=4 SV=1	1.77184	2.25894	2.29615	1.98267	0.27962	0.0909855	0.17691	0.118707	Cell growth and death; Cellular community - prokaryotes; Lipid metabolism; Transport and catabolism
Q3ZZG1	cbdbA392	Metallo-beta-lactamase family protein OS=Dehalococcoides mccartyi (strain CBDB1) GN=cbdbA392 PE=4 SV=1	2.07384	2.56692	2.27454	1.98659	0.397059	0.0923873	0.27311	0.796863	Folding, sorting and degradation; Translation
Q3ZXI7	cbdbA804	3-isopropylmalate dehydrogenase OS=Dehalococcoides mccartyi (strain CBDB1) GN=leuB PE=3 SV=1	2.68087	2.73117	2.61173	2.57668	0.0411333	0.209494	0.140724	0.180198	Amino acid metabolism; Carbohydrate metabolism
Q3ZY20	cbdbA1012	Isoleucine--tRNA ligase OS=Dehalococcoides mccartyi (strain CBDB1) GN=ileS PE=3 SV=1	2.1222	2.39271	2.23726	2.07203	0.0923292	0.190191	0.119138	0.319848	Amino acid metabolism; Translation
Q3ZZB5	cbdbA329	IMP dehydrogenase family protein OS=Dehalococcoides mccartyi (strain CBDB1) GN=cbdbA329 PE=3 SV=1	2.84279	2.92458	2.82152	2.7452	0.0630269	0.10214	0.033289	0.235924	Nucleotide metabolism; Transport and catabolism; Xenobiotics biodegradation and metabolism
Q3ZZA2	cbdbA285	Cell division protein FtsZ OS=Dehalococcoides mccartyi (strain CBDB1) GN=ftsZ PE=3 SV=1	2.5231	3.07543	2.97941	2.56929	0.106792	0.215086	0.191216	0.457393	Cell growth and death; Cell motility; Replication and repair; Transport and catabolism
Q3ZX20	cbdbA622	Cell division protein FtsZ OS=Dehalococcoides mccartyi (strain CBDB1) GN=ftsZ PE=3 SV=1	Id.	2.70386	2.35156	Id.		0.269997	0.423264		Cell growth and death; Cell motility; Replication and repair; Transport and catabolism
Q3ZYF0	cbdbA1196	Arginine--tRNA ligase OS=Dehalococcoides mccartyi (strain CBDB1) GN=argS PE=3 SV=1	2.01133	2.26609	2.27636	2.07707	0.210907	0.0850979	0.0644741	0.229462	Amino acid metabolism; Translation
Q3ZWF7	cbdbA82	Sensor histidine kinase OS=Dehalococcoides mccartyi (strain CBDB1) GN=rdhC PE=4 SV=1	1.67627	2.271	1.80238	1.88578	0.596405	0.1292	0.400732	0.568626
Q3ZY84	cbdbA1103	Riboflavin biosynthesis protein RibBA OS=Dehalococcoides mccartyi (strain CBDB1) GN=ribA PE=3 SV=1	1.89	2.60433	2.77735	1.96782	0.243381	0.574855	0.0511803	0.591159	Metabolism of cofactors and vitamins
Q3ZXW5	cbdbA971	Conserved domain protein OS=Dehalococcoides mccartyi (strain CBDB1) GN=cbdbA971 PE=4 SV=1	1.79465	2.67493	2.99977	1.8382	0.182397	0.6221	0.0893457	0.785075
Q3ZZJ8	cbdbA408	Putative isocitrate dehydrogenase OS=Dehalococcoides mccartyi (strain CBDB1) GN=cbdbA408 PE=3 SV=1	2.65844	2.72134	2.62675	2.76133	0.0931717	0.0538143	0.0216708	0.091279	Carbohydrate metabolism
Q3ZX84	cbdbA663	Aspartate--tRNA(Asp/Asn) ligase OS=Dehalococcoides mccartyi (strain CBDB1) GN=aspS PE=3 SV=1	1.93887	1.97888	2.225	2.15534	0.187226	0.412917	0.0857986	0.114028	Amino acid metabolism; Translation
Q3ZYP6	cbdbA1314	Putative mannosyl-3-phosphoglycerate synthase OS=Dehalococcoides mccartyi (strain CBDB1) GN=cbdbA1314 PE=4 SV=1	1.68132	2.05801	1.9159	1.94545	0.664754	0.125762	0.173543	0.0287745	Carbohydrate metabolism; Glycan biosynthesis and metabolism
Q3ZXZ5	cbdbA988	Phenylacetate-coenzyme A ligase OS=Dehalococcoides mccartyi (strain CBDB1) GN=cbdbA988 PE=3 SV=1	1.89806	2.46999	2.71432	2.2157	0.0501367	0.433179	0.0997839	0.433005	Amino acid metabolism; Cellular community - prokaryotes
Q3ZXY4	cbdbA1001	Probable cytosol aminopeptidase OS=Dehalococcoides mccartyi (strain CBDB1) GN=pepA PE=3 SV=1	2.62417	2.63556	2.743	2.59912	0.143008	0.0759156	0.14941	0.183532	Enzyme families; Metabolism of other amino acids
Q3ZZM4	cbdbA439	50S ribosomal protein L3 OS=Dehalococcoides mccartyi (strain CBDB1) GN=rplC PE=3 SV=1	2.45747	2.97912	3.09361	2.44621	0.203223	0.348663	0.0580947	0.272127	Translation
Q3ZXJ7	cbdbA793	Iron-regulated ABC transporter, atp-binding protein, SufC OS=Dehalococcoides mccartyi (strain CBDB1) GN=sufC PE=4 SV=1	1.59652	2.45066	2.5531	1.93235	0.213934	0.205799	0.152799	0.362268	Membrane transport
Q3ZXP5	cbdbA849	Putative hydrogenase subunit OS=Dehalococcoides mccartyi (strain CBDB1) GN=cbdbA849 PE=4 SV=1	1.91263	2.42464	2.47888	1.96058	0.208111	0.13813	0.0954267	0.49152
Q3ZWK7	cbdbA139	Oxaloacetate decarboxylase, alpha subunit OS=Dehalococcoides mccartyi (strain CBDB1) GN=oadA PE=4 SV=1	1.9489	2.40672	2.29921	1.93922	0.0164763	0.159782	0.133989	0.538783	Carbohydrate metabolism; Energy metabolism
Q3ZWY9	cbdbA569	Glyceraldehyde-3-phosphate dehydrogenase, typeI OS=Dehalococcoides mccartyi (strain CBDB1) GN=gap PE=3 SV=1	2.58466	2.79552	3.00477	2.57289	0.0907577	0.253928	0.00791741	0.345675	Carbohydrate metabolism; Energy metabolism; Signal transduction; Transport and catabolism
Q3ZXH5	cbdbA765	Glycine--tRNA ligase OS=Dehalococcoides mccartyi (strain CBDB1) GN=glyS PE=3 SV=1	2.84457	2.63375	2.55734	2.45413	0.188579	0.191455	0.0594952	0.586301	Amino acid metabolism; Translation
Q3ZX65	cbdbA685	Putative [Fe] hydrogenase, HymC subunit OS=Dehalococcoides mccartyi (strain CBDB1) GN=hymC PE=4 SV=1	2.34212	2.87683	2.98363	2.53068	0.212725	0.426963	0.0482598	0.331679
Q3ZYE1	cbdbA1145	DNA polymerase III subunit beta OS=Dehalococcoides mccartyi (strain CBDB1) GN=dnaN PE=4 SV=1	2.79824	2.95313	3.04676	2.96036	0.212362	0.17649	0.0162769	0.115032	Nucleotide metabolism; Replication and repair
Q3ZWY0	cbdbA554	Serine--tRNA ligase OS=Dehalococcoides mccartyi (strain CBDB1) GN=serS PE=3 SV=1	1.79987	2.18773	2.3175	2.19826	0.179007	0.278513	0.138191	0.121982	Amino acid metabolism; Translation
Q3ZZB2	cbdbA334	Methionine--tRNA ligase OS=Dehalococcoides mccartyi (strain CBDB1) GN=metG PE=3 SV=1	Id.	2.25172	2.11844	2.1823		0.130699	0.0223435	0.236238	Amino acid metabolism; Metabolism of other amino acids; Translation
Q3ZX19	cbdbA623	Cell division protein ftsA OS=Dehalococcoides mccartyi (strain CBDB1) GN=ftsA PE=3 SV=1	2.19038	2.7405	2.87758	2.43865	0.105957	0.501814	0.0106309	0.747738	Cell growth and death; Cell motility; Replication and repair
Q3ZYS3	cbdbA1336	Nicotinate-nucleotide pyrophosphorylase OS=Dehalococcoides mccartyi (strain CBDB1) GN=nadC PE=3 SV=1	2.41027	2.84703	3.10002	2.4581	0.184816	0.333261	0.0958236	0.493038	Metabolism of cofactors and vitamins
Q3ZXI5	cbdbA806	3-isopropylmalate dehydratase large subunit OS=Dehalococcoides mccartyi (strain CBDB1) GN=leuC PE=3 SV=1	2.42146	2.73883	2.75594	2.42881	0.0862258	0.0359339	0.0931607	0.327571	Amino acid metabolism; Biosynthesis of other secondary metabolites; Carbohydrate metabolism
Q3ZYB4	cbdbA1122	Threonine synthase OS=Dehalococcoides mccartyi (strain CBDB1) GN=thrC PE=3 SV=1	2.02043	2.32868	2.36123	2.13541	0.0702402	0.217463	0.0812434	0.273862	Amino acid metabolism; Metabolism of cofactors and vitamins
Q3ZW41	cbdbA1643	Aspartyl/glutamyl-tRNA(Asn/Gln) amidotransferase subunit B OS=Dehalococcoides mccartyi (strain CBDB1) GN=gatB PE=3 SV=1	1.14319	1.89279	1.85518	1.67867	0.213813	0.0531728	0.0269542	0.441587	Translation
Q3ZZU1	cbdbA534	ATP synthase subunit b OS=Dehalococcoides mccartyi (strain CBDB1) GN=atpF PE=3 SV=1	2.54509	2.94803	2.82952	2.40938	0.329879	0.130025	0.0873697	0.586021	Energy metabolism
Q3ZXH7	cbdbA817	GMP synthase [glutamine-hydrolyzing] OS=Dehalococcoides mccartyi (strain CBDB1) GN=guaA PE=3 SV=1	1.91941	2.1077	2.09623	2.22542	0.276471	0.0247439	0.0819741	0.262385	Enzyme families; Nucleotide metabolism; Xenobiotics biodegradation and metabolism
Q3ZXH9	cbdbA815	Dihydroxy-acid dehydratase OS=Dehalococcoides mccartyi (strain CBDB1) GN=ilvD PE=3 SV=1	2.30226	2.59362	2.6492	1.96338	0.0623914	0.139943	0.0808381	0.492075	Amino acid metabolism; Metabolism of cofactors and vitamins
Q3ZZB9	cbdbA325	Phosphoribosylformylglycinamidine synthase subunit PurL OS=Dehalococcoides mccartyi (strain CBDB1) GN=purL PE=3 SV=1	1.42791	1.80715	1.88288	1.51273	0.321859	0.0512714	0.103822	0.339591	Nucleotide metabolism
Q3ZX68	cbdbA682	Pyruvic-ferredoxin oxidoreductase, beta subunit OS=Dehalococcoides mccartyi (strain CBDB1) GN=porB PE=4 SV=1	2.62174	2.95955	2.98392	2.45652	0.361212	0.19616	0.0301193	0.795846	Carbohydrate metabolism; Energy metabolism; Xenobiotics biodegradation and metabolism
Q3ZXY0	cbdbA954	50S ribosomal protein L7/L12 OS=Dehalococcoides mccartyi (strain CBDB1) GN=rplL PE=3 SV=1	2.17287	3.06275	3.22642	2.62937	0.0764229	0.61038	0.0908713	0.702878	Translation
Q3ZZ08	cbdbA1453	Putative reductive dehalogenase OS=Dehalococcoides mccartyi (strain CBDB1) GN=rdhA PE=4 SV=1	2.50323	1.89686	2.345	1.7155	0.102616	0.341868	0.230748	0.495019
Q3ZZK1	cbdbA404	Acyl CoA biotin-dependant carboxyltransferase OS=Dehalococcoides mccartyi (strain CBDB1) GN=cbdbA404 PE=4 SV=1	1.78727	2.24824	2.16648	1.74597	0.115814	0.163246	0.0201372	0.512763	Amino acid metabolism; Carbohydrate metabolism
Q3ZW76	cbdbA1708	Homocitrate synthase OS=Dehalococcoides mccartyi (strain CBDB1) GN=cbdbA1708 PE=4 SV=1	1.98757	2.38886	2.45769	2.0985	0.026885	0.259117	0.152587	0.457007	Carbohydrate metabolism
Q3ZXQ4	cbdbA894	Acyl-CoA synthetase (AMP-forming) / AMP-acid ligase OS=Dehalococcoides mccartyi (strain CBDB1) GN=cbdbA894 PE=4 SV=1	1.52966	2.30554	2.35204	1.77057	0.060113	0.240221	0.0863842	0.495495	Amino acid metabolism; Cellular community - prokaryotes
Q3ZXS2	cbdbA873	Twitching mobility protein OS=Dehalococcoides mccartyi (strain CBDB1) GN=pilT PE=4 SV=1	2.03877	2.5148	2.60665	1.96273	0.0726143	0.21604	0.0696992	0.297942	Cell motility; Membrane transport
Q3ZZJ7	cbdbA409	Malate dehydrogenase OS=Dehalococcoides mccartyi (strain CBDB1) GN=mdh PE=3 SV=1	2.12091	2.65039	2.67748	2.26106	0.159637	0.252857	0.125695	0.420453	Amino acid metabolism; Carbohydrate metabolism; Energy metabolism
Q3ZZN4	cbdbA453	50S ribosomal protein L6 OS=Dehalococcoides mccartyi (strain CBDB1) GN=rplF PE=3 SV=1	2.20558	2.70892	2.83898	2.37663	0.0856963	0.40861	0.0841914	0.592668	Translation
Q3ZYQ7	cbdbA1302	Type II secretion system protein GspE OS=Dehalococcoides mccartyi (strain CBDB1) GN=gspE PE=4 SV=1	1.71158	1.89373	1.99593	1.73919	0.0837923	0.313742	0.0570368	0.283806	Cell motility; Membrane transport
Q3ZXL7	cbdbA826	Histidinol dehydrogenase OS=Dehalococcoides mccartyi (strain CBDB1) GN=hisD PE=3 SV=1	1.98081	2.22027	2.52131	1.99876	0.214548	0.0328321	0.0463931	0.474965	Amino acid metabolism
Q3ZXT9	cbdbA921	3-oxoacyl-[acyl-carrier-protein] synthase 2 OS=Dehalococcoides mccartyi (strain CBDB1) GN=fabF PE=3 SV=1	2.10366	2.47323	2.48523	2.35802	0.195115	0.285294	0.0305141	0.158174	Lipid metabolism; Metabolism of cofactors and vitamins
Q3ZZU9	cbdbA525	RNA polymerase sigma factor SigA OS=Dehalococcoides mccartyi (strain CBDB1) GN=rpoD PE=3 SV=1	1.94968	2.26973	2.20197	2.2566	0.127986	0.149501	0.122955	0.137752	Transcription
Q3ZWU9	cbdbA266	Uncharacterized protein OS=Dehalococcoides mccartyi (strain CBDB1) GN=cbdbA266 PE=4 SV=1	1.78652	2.04343	2.1857	1.90034	0.141925	0.251935	0.134077	0.513231	Poorly characterized
Q3ZY30	cbdbA1055	Archaeal-type glutamate synthase [NADPH] OS=Dehalococcoides mccartyi (strain CBDB1) GN=cbdbA1055 PE=3 SV=1	2.47435	2.65948	2.53518	2.34876	0.28726	0.0973597	0.181406	0.313353
Q3ZWI6	cbdbA102	Uncharacterized protein OS=Dehalococcoides mccartyi (strain CBDB1) GN=cbdbA102 PE=4 SV=1	1.92903	1.92094	2.03373	Id.	0.124807	0.19645	0.121353
Q3ZZI7	cbdbA424	Chorismate mutase/prephenate dehydratase (P-protein) OS=Dehalococcoides mccartyi (strain CBDB1) GN=pheA PE=4 SV=1	2.54677	2.82437	2.9633	2.7534	0.102827	0.156127	0.0191165	0.187683	Amino acid metabolism
Q3ZZJ6	cbdbA410	Uncharacterized protein OS=Dehalococcoides mccartyi (strain CBDB1) GN=cbdbA410 PE=4 SV=1	2.54946	2.89635	2.87288	2.42086	0.519543	0.270055	0.283933	0.627779
Q3ZYY2	cbdbA1436	DNA polymerase III, alpha subunit OS=Dehalococcoides mccartyi (strain CBDB1) GN=dnaE PE=4 SV=1	1.56	1.93465	1.65552	1.64398	0.236072	0.0597586	0.281799	0.189304	Nucleotide metabolism; Replication and repair
Q3ZXI0	cbdbA813	Acetolactate synthase OS=Dehalococcoides mccartyi (strain CBDB1) GN=ilvB PE=3 SV=1	2.04126	2.55603	2.45904	2.02348	0.0957146	0.280328	0.0748024	0.62521	Amino acid metabolism; Carbohydrate metabolism; Metabolism of cofactors and vitamins
Q3ZWZ2	cbdbA596	Hydrogenase, group 3, VhuG subunit OS=Dehalococcoides mccartyi (strain CBDB1) GN=cbdbA596 PE=4 SV=1	2.14373	2.719	3.1804	2.55102	0.0996107	0.523742	0.108601	0.671846	Metabolism
Q3ZYW4	cbdbA1399	[NiFe] hydrogenase maturation protein HypF OS=Dehalococcoides mccartyi (strain CBDB1) GN=hypF PE=4 SV=1	1.49274	1.65709	1.65734	1.51391	0.186587	0.0995224	0.0838933	0.129016	Genetic information processing
Q3ZZN2	cbdbA430	3-dehydroquinate dehydratase OS=Dehalococcoides mccartyi (strain CBDB1) GN=aroD PE=3 SV=1	2.2673	2.34375	2.32622	2.17869	0.0799631	0.086075	0.205226	0.344877	Amino acid metabolism
Q3ZYE8	cbdbA1199	Enoyl-[acyl-carrier-protein] reductase [NADH] OS=Dehalococcoides mccartyi (strain CBDB1) GN=fabI PE=3 SV=1	2.39066	2.70445	2.62842	2.49373	0.0377944	0.177954	0.0795963	0.322183	Biosynthesis of other secondary metabolites; Lipid metabolism; Metabolism of cofactors and vitamins
Q3ZYU1	cbdbA1371	CTP synthase OS=Dehalococcoides mccartyi (strain CBDB1) GN=pyrG PE=3 SV=1	2.33369	2.52913	2.47362	2.1233	0.161109	0.0334138	0.102215	0.320532	Nucleotide metabolism
Q3ZXF0	cbdbA738	K(+)-insensitive pyrophosphate-energized proton pump OS=Dehalococcoides mccartyi (strain CBDB1) GN=hppA PE=3 SV=1	1.76333	2.37671	2.76974	1.92453	0.137971	0.601802	0.0518774	0.771805	Energy metabolism
Q3ZZC4	cbdbA318	Ribosome-recycling factor OS=Dehalococcoides mccartyi (strain CBDB1) GN=frr PE=3 SV=1	2.44125	2.32119	2.71072	2.21891	0.209312	0.741197	0.0533416	0.573344	Translation
Q3ZX46	cbdbA651	Carbon monoxide dehydrogenase/acetyl-CoA synthase large subunit OS=Dehalococcoides mccartyi (strain CBDB1) GN=acsC PE=4 SV=1	2.31104	2.24511	2.28866	2.10506	0.0742595	0.0633588	0.238762	0.30142	Energy metabolism
Q3ZXA5	cbdbA688	Conserved domain protein OS=Dehalococcoides mccartyi (strain CBDB1) GN=cbdbA688 PE=4 SV=1	2.53026	2.71724	2.59132	2.64796	0.0498773	0.41389	0.0878829	0.376554
Q3ZX44	cbdbA654	Carbon monoxide dehydrogenase/acetyl-CoA synthase small subunit OS=Dehalococcoides mccartyi (strain CBDB1) GN=acsD PE=4 SV=1	2.43676	2.5737	2.61693	2.51564	0.238512	0.128427	0.0321266	0.281476	Energy metabolism
Q3ZZR5	cbdbA508	Diaminopimelate decarboxylase OS=Dehalococcoides mccartyi (strain CBDB1) GN=lysA PE=3 SV=1	1.87767	2.36189	2.6718	2.22933	0.149561	0.382793	0.056314	0.427486	Amino acid metabolism
Q3ZXC7	cbdbA715	Diaminopimelate epimerase OS=Dehalococcoides mccartyi (strain CBDB1) GN=dapF PE=3 SV=1	2.60177	2.67763	2.56157	2.51702	0.129504	0.272798	0.0594471	0.202607	Amino acid metabolism
Q3ZZP7	cbdbA465	30S ribosomal protein S4 OS=Dehalococcoides mccartyi (strain CBDB1) GN=rpsD PE=3 SV=1	2.73224	2.9718	3.01346	2.79966	0.0487955	0.172266	0.144922	0.0860147	Translation
Q3ZX04	cbdbA581	Soluble hydrogenase, tritium exchange subunit OS=Dehalococcoides mccartyi (strain CBDB1) GN=cbdbA581 PE=3 SV=1	2.10651	2.58293	2.69502	1.96631	0.100971	0.354953	0.12804	0.793364
Q3ZXQ1	cbdbA897	Putative branched-chain amino acid ABC transporter,periplasmic amino acid-binding protein OS=Dehalococcoides mccartyi (strain CBDB1) GN=cbdbA897 PE=4 SV=1	2.78085	2.46596	2.14902	2.54372	0.137092	0.307026	0.0855014	0.360553	Cellular community - prokaryotes; Membrane transport
Q3ZZB8	cbdbA327	Pyridoxal biosynthesis lyase PdxS OS=Dehalococcoides mccartyi (strain CBDB1) GN=pdxS PE=3 SV=1	2.7263	3.00436	2.95127	2.74125	0.120089	0.0782581	0.117189	0.258811	Metabolism of cofactors and vitamins
Q3ZVY4	cbdbA1591	Sensor histidine kinase/response regulator OS=Dehalococcoides mccartyi (strain CBDB1) GN=cbdbA1591 PE=4 SV=1	1.43962	1.35349	1.69588	1.56168	0.20912	0.0784115	0.0465756	0.202592
Q3ZXX8	cbdbA956	50S ribosomal protein L1 OS=Dehalococcoides mccartyi (strain CBDB1) GN=rplA PE=3 SV=1	2.56062	3.08216	2.91664	2.88564	0.208822	0.156532	0.10964	0.110584	Translation
Q3ZYF9	cbdbA1185	Argininosuccinate lyase OS=Dehalococcoides mccartyi (strain CBDB1) GN=argH PE=3 SV=1	1.6849	2.27016	2.52339	1.90866	0.344512	0.471225	0.0424657	0.507538	Amino acid metabolism; Transport and catabolism
Q3ZXX6	cbdbA958	Transcription termination/antitermination protein NusG OS=Dehalococcoides mccartyi (strain CBDB1) GN=nusG PE=3 SV=1	2.63158	2.4455	2.52323	2.18041	0.120552	0.195463	0.0791775	0.346452	Transcription; Translation
Q3ZZT8	cbdbA537	ATP synthase gamma chain OS=Dehalococcoides mccartyi (strain CBDB1) GN=atpG PE=3 SV=1	2.11149	2.641	2.61784	2.227	0.041769	0.212607	0.0638461	0.159123	Energy metabolism
Q3ZYI7	cbdbA1210	Radical SAM domain protein OS=Dehalococcoides mccartyi (strain CBDB1) GN=cbdbA1210 PE=4 SV=1	1.64743	2.20644	1.54724	1.53421	0.0662757	0.199416	0.428313	0.752465
Q3ZZA3	cbdbA283	Cell division protein ftsA OS=Dehalococcoides mccartyi (strain CBDB1) GN=ftsA PE=3 SV=1	1.79154	2.48412	2.39756	2.31271	0.708966	0.124518	0.315754	0.304967	Cell growth and death; Cell motility; Replication and repair
Q3ZZW8	cbdbA1731	Aspartokinase OS=Dehalococcoides mccartyi (strain CBDB1) GN=metL PE=3 SV=1	2.4188	2.78219	2.74781	2.43801	0.0631143	0.118551	0.0696668	0.495375	Amino acid metabolism; Biosynthesis of other secondary metabolites
Q3ZWD3	cbdbA50	Uncharacterized protein OS=Dehalococcoides mccartyi (strain CBDB1) GN=cbdbA50 PE=4 SV=1	Id.	2.35757	2.33478	2.20415		0.0630616	0.170192	0.197794
Q3ZXL6	cbdbA828	Probable ATP phosphoribosyltransferase OS=Dehalococcoides mccartyi (strain CBDB1) GN=cbdbA828 PE=4 SV=1	1.99366	2.44423	2.40007	1.91724	0.267743	0.093344	0.0655033	0.466714	Amino acid metabolism
Q3ZWK6	cbdbA141	Acetyl-CoA carboxylase, biotin carboxylase OS=Dehalococcoides mccartyi (strain CBDB1) GN=accC PE=4 SV=1	1.70936	2.17501	2.17524	1.88212	0.193622	0.37188	0.156801	0.0890072	Carbohydrate metabolism; Energy metabolism
Q3ZXL3	cbdbA831	SPFH domain protein OS=Dehalococcoides mccartyi (strain CBDB1) GN=cbdbA831 PE=4 SV=1	2.0942	2.87252	3.1926	2.26159	0.295993	0.377909	0.138159	0.939203
Q3ZXL5	cbdbA829	ATP phosphoribosyltransferase regulatory subunit OS=Dehalococcoides mccartyi (strain CBDB1) GN=hisZ PE=3 SV=1	2.35694	2.67319	2.81811	2.48851	0.167774	0.210612	0.034079	0.270982	Amino acid metabolism; Translation
Q3ZYL7	cbdbA1293	Tryptophan--tRNA ligase OS=Dehalococcoides mccartyi (strain CBDB1) GN=trpS PE=3 SV=1	2.47151	2.70097	2.31939	2.23566	0.217147	0.130029	0.130869	0.410956	Amino acid metabolism; Translation
Q3ZZ17	cbdbA1441	Anthranilate synthase component I OS=Dehalococcoides mccartyi (strain CBDB1) GN=trpE PE=4 SV=1	2.22477	2.26345	2.23368	2.01892	0.122302	0.133033	0.151878	0.159544	Amino acid metabolism; Biosynthesis of other secondary metabolites; Cellular community - prokaryotes
Q3ZZK0	cbdbA405	3-isopropylmalate dehydratase large subunit OS=Dehalococcoides mccartyi (strain CBDB1) GN=leuC PE=3 SV=1	2.12107	2.66079	2.71391	2.22977	0.243099	0.314919	0.212016	0.560653	Amino acid metabolism; Biosynthesis of other secondary metabolites; Carbohydrate metabolism
Q3ZWG4	cbdbA76	Cysteine--tRNA ligase OS=Dehalococcoides mccartyi (strain CBDB1) GN=cysS PE=3 SV=1	1.94851	2.35662	2.36822	2.29505	0.160993	0.141249	0.0840549	0.210793	Amino acid metabolism; Translation
Q3ZZE4	cbdbA358	Rubrerythrin OS=Dehalococcoides mccartyi (strain CBDB1) GN=cbdbA358 PE=4 SV=1	2.75866	2.77096	2.86471	2.56075	0.0480977	0.196976	0.273035	0.391908
Q3ZZV6	cbdbA517	Phosphate acyltransferase OS=Dehalococcoides mccartyi (strain CBDB1) GN=plsX PE=3 SV=1	1.86858	2.35451	2.23466	2.15118	0.323606	0.293563	0.177104	0.380378	Lipid metabolism
Q3ZYL8	cbdbA1292	Aspartate aminotransferase OS=Dehalococcoides mccartyi (strain CBDB1) GN=aspC PE=3 SV=1	2.26667	2.23161	2.32409	2.24751	0.200471	0.127066	0.0646204	0.153944	Amino acid metabolism
Q3ZZR1	cbdbA512	ATP-binding protein, DnaC family OS=Dehalococcoides mccartyi (strain CBDB1) GN=cbdbA512 PE=4 SV=1	1.64326	1.99434	1.61237	1.71656	0.23796	0.312763	0.404809	0.121963	Replication and repair
Q3ZYB2	cbdbA1124	Uncharacterized protein OS=Dehalococcoides mccartyi (strain CBDB1) GN=cbdbA1124 PE=4 SV=1	1.84583	2.18525	2.00847	1.71051	0.226004	0.216352	0.192214	0.377857
Q3ZX39	cbdbA629	Transketolase OS=Dehalococcoides mccartyi (strain CBDB1) GN=tkt PE=3 SV=1	1.77181	2.21598	2.38274	1.79466	0.0746539	0.317172	0.0634302	0.446197	Carbohydrate metabolism; Energy metabolism; Metabolism of terpenoids and polyketides
Q3ZW84	cbdbA1700	Protein RecA OS=Dehalococcoides mccartyi (strain CBDB1) GN=recA PE=3 SV=1	2.37085	2.33875	2.24672	2.18611	0.135796	0.102066	0.0347971	0.24884	Replication and repair
Q3ZYQ8	cbdbA1301	DNA-binding response regulator, LuxR family OS=Dehalococcoides mccartyi (strain CBDB1) GN=cbdbA1301 PE=4 SV=1	1.92946	2.29441	2.39513	2.18705	0.205132	0.0781776	0.175997	0.191897
Q3ZXT8	cbdbA902	Indolepyruvate oxidoreductase subunit IorA OS=Dehalococcoides mccartyi (strain CBDB1) GN=iorA PE=4 SV=1	1.3795	1.84082	2.04057	1.48059	0.201329	0.515411	0.078855	0.531164	Metabolism
Q3ZY27	cbdbA1059	Pyridine nucleotide-disulfide oxidoreductase family protein OS=Dehalococcoides mccartyi (strain CBDB1) GN=cbdbA1059 PE=4 SV=1	2.42783	2.45344	2.15801	2.2768	0.0202537	0.108746	0.297514	0.266581
Q3ZWX1	cbdbA563	Putative DNA polymerase III, gamma and tau subunits OS=Dehalococcoides mccartyi (strain CBDB1) GN=dnaX PE=4 SV=1	1.17756	2.02785	2.24353	1.85863	0.393444	0.313668	0.0825142	0.255321	Nucleotide metabolism; Replication and repair
Q3ZXQ8	cbdbA890	Cobyric acid synthase OS=Dehalococcoides mccartyi (strain CBDB1) GN=cobQ PE=3 SV=1	1.75907	1.95651	2.15044	1.83375	0.0874878	0.136532	0.0108746	0.221379	Metabolism of cofactors and vitamins
Q3ZXV4	cbdbA934	Aspartate-semialdehyde dehydrogenase OS=Dehalococcoides mccartyi (strain CBDB1) GN=asd PE=3 SV=1	2.06034	2.09534	2.55507	2.00397	0.092167	0.242888	0.131736	0.381931	Amino acid metabolism; Biosynthesis of other secondary metabolites
Q3ZXX9	cbdbA955	50S ribosomal protein L10 OS=Dehalococcoides mccartyi (strain CBDB1) GN=rplJ PE=3 SV=1	1.98637	2.64734	2.44334	2.20283	0.264098	0.459382	0.284485	0.616491	Translation
Q3ZZN9	cbdbA474	Phosphoglucomutase OS=Dehalococcoides mccartyi (strain CBDB1) GN=cbdbA474 PE=3 SV=1	2.08207	2.17664	2.06531	2.2043	0.313396	0.231615	0.0615731	0.151967
Q3ZYP4	cbdbA1316	Glutamate--tRNA ligase OS=Dehalococcoides mccartyi (strain CBDB1) GN=gltX PE=3 SV=1	1.87957	2.37074	2.25602	2.15303	0.122142	0.0870482	0.151342	0.141812	Amino acid metabolism; Metabolism of cofactors and vitamins; Translation; Transport and catabolism
Q3ZZH0	cbdbA383	Phosphopantothenoylcysteine synthetase/decarboxylase OS=Dehalococcoides mccartyi (strain CBDB1) GN=coaBC PE=4 SV=1	1.74069	1.77381	2.10909	1.66071	0.364502	0.176643	0.0296114	0.428932	Metabolism of cofactors and vitamins
Q3ZXN1	cbdbA864	Uncharacterized protein OS=Dehalococcoides mccartyi (strain CBDB1) GN=cbdbA864 PE=4 SV=1	2.00966	2.19705	2.36836	2.09087	0.171907	0.07628	0.0375246	0.0513741
Q3ZYV6	cbdbA1353	Ornithine carbamoyltransferase OS=Dehalococcoides mccartyi (strain CBDB1) GN=argF PE=3 SV=1	2.29802	2.27826	2.25247	2.20951	0.0906547	0.179858	0.207291	0.284135	Amino acid metabolism
Q3ZVX6	cbdbA1601	Sensor histidine kinase/response regulator OS=Dehalococcoides mccartyi (strain CBDB1) GN=rdhCD PE=4 SV=1	1.10205	1.38082	1.62077	1.40253	0.43329	0.227689	0.0709135	0.444891
Q3ZWH6	cbdbA113	Uncharacterized protein OS=Dehalococcoides mccartyi (strain CBDB1) GN=cbdbA113 PE=4 SV=1	1.72561	2.58949	2.97492	2.51761	0.480927	0.315725	0.213491	0.715265
Q3ZZG4	cbdbA389	Ribose-phosphate pyrophosphokinase OS=Dehalococcoides mccartyi (strain CBDB1) GN=prs PE=3 SV=1	2.5647	2.39566	2.39761	2.49625	0.156396	0.172375	0.0887197	0.097787	Carbohydrate metabolism; Nucleotide metabolism
Q3ZYB3	cbdbA1123	Homoserine dehydrogenase OS=Dehalococcoides mccartyi (strain CBDB1) GN=metM PE=3 SV=1	1.79921	2.239	2.45004	1.95353	0.211618	0.235514	0.166223	0.522957	Amino acid metabolism
Q3ZXE1	cbdbA749	Phosphomethylpyrimidine synthase OS=Dehalococcoides mccartyi (strain CBDB1) GN=thiC PE=3 SV=1	2.14327	2.32918	2.11882	Id.	0.15937	0.0462685	0.0228179		Metabolism of cofactors and vitamins
Q3ZYZ2	cbdbA1419	50S ribosomal protein L25 OS=Dehalococcoides mccartyi (strain CBDB1) GN=rplY PE=3 SV=1	2.58222	2.35717	2.63003	2.4556	0.335665	0.447479	0.066032	0.381508	Translation
Q3ZWD5	cbdbA46	Glutamate synthase (NADPH), homotetrameric OS=Dehalococcoides mccartyi (strain CBDB1) GN=gltA PE=4 SV=1	1.51427	1.97576	2.30804	1.8594	0.100932	0.195134	0.110125	0.0223488	Amino acid metabolism; Energy metabolism
Q3ZZP3	cbdbA469	50S ribosomal protein L13 OS=Dehalococcoides mccartyi (strain CBDB1) GN=rplM PE=3 SV=1	2.00024	3.15285	3.08355	2.44012	0.504185	0.376936	0.15005	0.622569	Translation
Q3ZYM5	cbdbA1284	Glutamyl-tRNA(Gln) amidotransferase subunit A OS=Dehalococcoides mccartyi (strain CBDB1) GN=gatA PE=3 SV=1	1.54437	2.12229	1.95278	1.62565	0.0621376	0.105668	0.117125	0.489296	Translation
Q3ZXS8	cbdbA914	Uncharacterized protein OS=Dehalococcoides mccartyi (strain CBDB1) GN=cbdbA914 PE=4 SV=1	2.72791	2.69945	2.47132	Id.	0.0548522	0.0366936	0.235389
Q3ZZI6	cbdbA425	Chorismate synthase OS=Dehalococcoides mccartyi (strain CBDB1) GN=aroC PE=3 SV=1	2.68942	2.81418	2.85742	2.61712	0.0814085	0.0552448	0.0143888	0.329439	Amino acid metabolism
Q3ZWB6	cbdbA7	Histidine--tRNA ligase OS=Dehalococcoides mccartyi (strain CBDB1) GN=hisS PE=3 SV=1	2.06837	2.22148	2.30475	2.03489	0.216856	0.125415	0.0733425	0.236232	Amino acid metabolism; Translation
Q3ZXV3	cbdbA935	4-hydroxy-tetrahydrodipicolinate synthase OS=Dehalococcoides mccartyi (strain CBDB1) GN=dapA PE=3 SV=1	2.65547	2.49292	2.51154	2.52679	0.150923	0.103698	0.0733397	0.145455	Amino acid metabolism; Biosynthesis of other secondary metabolites
Q3ZW67	cbdbA1669	Peroxiredoxin OS=Dehalococcoides mccartyi (strain CBDB1) GN=cbdbA1669 PE=3 SV=1	2.54265	2.29675	2.55404	2.27527	0.191346	0.320839	0.0801515	0.451927	Cell growth and death; Transport and catabolism
Q3ZXD9	cbdbA751	Single-stranded nucleic acid binding R3H domain protein OS=Dehalococcoides mccartyi (strain CBDB1) GN=cbdbA751 PE=4 SV=1	1.50158	1.6441	1.80345	1.66836	0.175332	0.179833	0.104121	0.370751
Q3ZZD8	cbdbA364	Uncharacterized protein OS=Dehalococcoides mccartyi (strain CBDB1) GN=cbdbA364 PE=4 SV=1	1.68885	2.29991	2.27536	2.10702	0.0548632	0.196128	0.0383213	0.110733
Q3ZZV0	cbdbA524	Putative exonuclease SbcC OS=Dehalococcoides mccartyi (strain CBDB1) GN=cbdbA524 PE=4 SV=1	Id.	1.45914	1.63739	Id.		0.18515	0.273614		Replication and repair
Q3ZY69	cbdbA1066	Radical SAM domain protein OS=Dehalococcoides mccartyi (strain CBDB1) GN=rdhI PE=4 SV=1	1.93736	2.08952	2.2404	1.96349	0.197825	0.0320512	0.0472363	0.126913
Q3ZX71	cbdbB16	Pyruvic-ferredoxin oxidoreductase, gammasubunit OS=Dehalococcoides mccartyi (strain CBDB1) GN=porG PE=4 SV=1	2.01772	2.72927	2.9015	2.32781	0.0905497	0.428017	0.0347478	0.335998	Carbohydrate metabolism; Energy metabolism; Xenobiotics biodegradation and metabolism
Q3ZYM1	cbdbA1289	ABC transporter, ATP-binding protein OS=Dehalococcoides mccartyi (strain CBDB1) GN=cbdbA1289 PE=3 SV=1	2.09467	2.19663	2.10847	2.24694	0.0853096	0.117292	0.180778	0.112583	Membrane transport
Q3ZZH8	cbdbA372	DegV family protein OS=Dehalococcoides mccartyi (strain CBDB1) GN=degV PE=4 SV=1	2.17311	2.87801	2.92833	2.45347	0.40171	0.204029	0.183748	0.458993
Q3ZZJ5	cbdbA411	Putative fumarate hydratase, alpha subunit OS=Dehalococcoides mccartyi (strain CBDB1) GN=cbdbA411 PE=4 SV=1	1.83602	1.75788	1.77064	1.85602	0.282633	0.228067	0.0626963	0.215537	Carbohydrate metabolism; Energy metabolism
Q3ZXG8	cbdbA773	ABC transporter, ATP-binding protein OS=Dehalococcoides mccartyi (strain CBDB1) GN=cbdbA773 PE=3 SV=1	1.36919	1.93086	2.0754	1.49477	0.213969	0.518415	0.179706	0.636678	Membrane transport
Q3ZY08	cbdbA1025	Putative cell division protein OS=Dehalococcoides mccartyi (strain CBDB1) GN=cbdbA1025 PE=4 SV=1	1.50009	1.95654	1.92231	1.9222	0.166244	0.0536734	0.0490095	0.124908
Q3ZYS2	cbdbA1338	L-aspartate oxidase OS=Dehalococcoides mccartyi (strain CBDB1) GN=nabD PE=4 SV=1	1.58911	1.563	1.75033	1.51438	0.138884	0.262387	0.300719	0.341006	Amino acid metabolism; Metabolism of cofactors and vitamins
Q3ZY82	cbdbA1105	Riboflavin biosynthesis protein RibD OS=Dehalococcoides mccartyi (strain CBDB1) GN=ribD PE=3 SV=1	1.97571	2.17366	2.11888	2.22294	0.246256	0.175028	0.048263	0.0702259	Cellular community - prokaryotes; Metabolism of cofactors and vitamins
Q3ZYS8	cbdbA1331	Uncharacterized protein OS=Dehalococcoides mccartyi (strain CBDB1) GN=cbdbA1331 PE=4 SV=1	Id.	2.12989	2.83984	2.0476		1.02461	0.0960568	0.901203
Q3ZXW3	cbdbA951	Acetyltransferase, GNAT family OS=Dehalococcoides mccartyi (strain CBDB1) GN=cbdbA951 PE=4 SV=1	1.21962	2.12215	2.69192	1.74591	0.228764	0.792499	0.127683	0.99102
Q3ZXQ2	cbdbA896	Putative branched-chain amino acid ABC transporter,periplasmic amino acid-binding protein OS=Dehalococcoides mccartyi (strain CBDB1) GN=cbdbA896 PE=4 SV=1	2.09938	2.17241	1.951	2.23726	0.089221	0.0386508	0.239699	0.148205	Cellular community - prokaryotes; Membrane transport
Q3ZY77	cbdbA1110	DNA mismatch repair protein MutL OS=Dehalococcoides mccartyi (strain CBDB1) GN=mutL PE=3 SV=1	1.11304	1.61504	1.5778	1.90022	0.245709	0.136693	0.269397	0.182632	Replication and repair
Q3ZYG0	cbdbA1183	Argininosuccinate synthase OS=Dehalococcoides mccartyi (strain CBDB1) GN=argG PE=3 SV=1	2.64666	2.99475	2.89657	2.66208	0.0914381	0.150463	0.0623198	0.21217	Amino acid metabolism; Transport and catabolism
Q3ZZV8	cbdbA515	50S ribosomal protein L9 OS=Dehalococcoides mccartyi (strain CBDB1) GN=rplI PE=3 SV=1	1.98304	2.48415	2.62043	2.27741	0.196226	0.428221	0.229213	0.395838	Translation
Q3ZXP4	cbdbA850	Hydrogenase, group 4, EchE subunit OS=Dehalococcoides mccartyi (strain CBDB1) GN=cbdbA850 PE=4 SV=1	1.63612	2.12488	2.40359	2.30326	0.223295	0.790243	0.0662684	0.138539
Q3ZXG9	cbdbA772	ABC transporter associated protein with signal peptide, putative periplasmic substrate binding subunit OS=Dehalococcoides mccartyi (strain CBDB1) GN=cbdbA772 PE=4 SV=1	Id.	2.50149	2.47481	Id.		0.100672	0.185576
Q3ZXE6	cbdbA743	Transcription elongation factor GreA OS=Dehalococcoides mccartyi (strain CBDB1) GN=greA PE=3 SV=1	n.d.	2.40397	1.9905	Id.		0.0587249	0.318748		Transcription
Q3ZXL8	cbdbA825	Histidinol-phosphate aminotransferase OS=Dehalococcoides mccartyi (strain CBDB1) GN=hisC PE=3 SV=1	1.87096	1.94829	2.08612	1.64253	0.0130755	0.440316	0.248267	0.450419	Amino acid metabolism; Biosynthesis of other secondary metabolites
Q3ZZ67	cbdbA1489	Uncharacterized protein OS=Dehalococcoides mccartyi (strain CBDB1) GN=cbdbA1489 PE=4 SV=1	2.39143	2.55317	2.72831	2.38607	0.113115	0.221177	0.0742724	0.141724
Q3ZYA9	cbdbA1127	Peptide chain release factor 1 OS=Dehalococcoides mccartyi (strain CBDB1) GN=prfA PE=3 SV=1	1.13591	1.99215	2.28503	Id.	0.331975	0.558051	0.0326805		Translation
Q3ZX50	cbdbA645	Thioredoxin OS=Dehalococcoides mccartyi (strain CBDB1) GN=trx PE=3 SV=1	2.85868	3.14556	3.31265	2.84238	0.338593	0.151334	0.157687	0.544193	Folding, sorting and degradation;
Q3ZYA4	cbdbA1133	Tyrosine recombinase XerC OS=Dehalococcoides mccartyi (strain CBDB1) GN=xerD PE=3 SV=1	1.97539	2.43401	2.30609	2.15803	0.254371	0.116737	0.0768562	0.356748	Replication and repair
Q3ZWT8	cbdbA219	L-lysine 2,3-aminomutase homologe, probable frameshift OS=Dehalococcoides mccartyi (strain CBDB1) GN=kamA PE=4 SV=1	2.01892	1.59466	1.51762	1.48574	0.388114	0.37351	0.250002	0.294115	Amino acid metabolism
Q3ZZM7	cbdbA435	30S ribosomal protein S7 OS=Dehalococcoides mccartyi (strain CBDB1) GN=rpsG PE=3 SV=1	2.67794	3.07068	3.14365	2.83884	0.133702	0.247314	0.0869413	0.251152	Translation
Q3ZW71	cbdbA1715	ABC transporter, ATP-binding protein OS=Dehalococcoides mccartyi (strain CBDB1) GN=cbdbA1715 PE=4 SV=1	1.50523	2.03564	2.10869	1.83524	0.338083	0.592963	0.333378	0.172857	Membrane transport
Q3ZX43	cbdbA656	Bifunctional protein FolD OS=Dehalococcoides mccartyi (strain CBDB1) GN=folD PE=3 SV=1	2.42908	2.52125	2.27386	2.42934	0.169303	0.132022	0.171044	0.230708	Energy metabolism; Metabolism of cofactors and vitamins
Q3ZXC2	cbdbA720	1-deoxy-D-xylulose-5-phosphate synthase OS=Dehalococcoides mccartyi (strain CBDB1) GN=dxs PE=3 SV=1	2.01572	1.89443	1.74166	1.81165	0.252523	0.0364074	0.204319	0.0662991	Metabolism of cofactors and vitamins; Metabolism of terpenoids and polyketides
Q3ZYL0	cbdbA1245	Uncharacterized protein OS=Dehalococcoides mccartyi (strain CBDB1) GN=cbdbA1245 PE=4 SV=1	2.71555	2.87235	3.11816	2.60671	0.243248	0.364323	0.0365704	0.508427
Q3ZX48	cbdbA647	DNA-binding response regulator, LuxR family OS=Dehalococcoides mccartyi (strain CBDB1) GN=cbdbA647 PE=4 SV=1	1.96994	2.15457	2.16832	1.51869	0.167267	0.260426	0.0139113	0.762567
Q3ZX30	cbdbA606	Radical SAM domain protein OS=Dehalococcoides mccartyi (strain CBDB1) GN=rdhI PE=4 SV=1	1.67009	2.34393	2.52653	2.2685	0.346507	0.545227	0.173363	0.220316
Q3ZXH1	cbdbA769	Adenine deaminase OS=Dehalococcoides mccartyi (strain CBDB1) GN=ade PE=3 SV=1	1.55756	2.10958	1.96037	1.4835	0.299677	0.333074	0.146776	0.51631	Nucleotide metabolism
Q3ZY76	cbdbA1111	ATP-dependent DNA helicase PcrA OS=Dehalococcoides mccartyi (strain CBDB1) GN=pcrA PE=4 SV=1	Id.	1.75861	1.74047	Id.		0.17436	0.240367		Replication and repair
Q3ZYH2	cbdbA1234	DNA-binding response regulator OS=Dehalococcoides mccartyi (strain CBDB1) GN=cbdbA1234 PE=4 SV=1	2.04306	2.32731	2.37683	2.05096	0.512685	0.0650264	0.0313242	0.310624
Q3ZXA3	cbdbA691	GTPase HflX OS=Dehalococcoides mccartyi (strain CBDB1) GN=hflX PE=3 SV=1	1.51299	1.87681	2.01658	Id.	0.365109	0.28336	0.0225152		Translation
Q3ZXI1	cbdbA812	Acetolactate synthase, small subunit OS=Dehalococcoides mccartyi (strain CBDB1) GN=ilvN PE=4 SV=1	2.37312	2.55512	2.44688	2.36	0.167506	0.153324	0.0771335	0.426184	Amino acid metabolism; Carbohydrate metabolism; Metabolism of cofactors and vitamins
Q3ZZF6	cbdbA343	Nucleoside diphosphate kinase OS=Dehalococcoides mccartyi (strain CBDB1) GN=ndk PE=3 SV=1	2.278	2.64579	2.71212	2.50194	0.164354	0.260984	0.0706293	0.331452	Folding, sorting and degradation; Nucleotide metabolism; Signal transduction
Q3ZYG2	cbdbA1181	Acetylornithine aminotransferase OS=Dehalococcoides mccartyi (strain CBDB1) GN=argD PE=3 SV=1	1.65371	1.97429	2.19972	1.6745	0.276557	0.376857	0.0587144	0.21513	Amino acid metabolism
Q3ZZ11	cbdbA1450	Tryptophan synthase beta chain OS=Dehalococcoides mccartyi (strain CBDB1) GN=trpB PE=3 SV=1	2.49521	2.3892	2.30597	2.37619	0.234769	0.0414775	0.104439	0.0306999	Amino acid metabolism
Q3ZZS9	cbdbA486	Putative daunorubicin resistance ABC transporter, ATP-binding protein OS=Dehalococcoides mccartyi (strain CBDB1) GN=cbdbA486 PE=4 SV=1	1.76998	2.02169	2.12625	1.96986	0.299973	0.0578881	0.250785	0.132792	Membrane transport
Q3ZY18	cbdbA1015	Putative inner membrane protein, 60 kDa OS=Dehalococcoides mccartyi (strain CBDB1) GN=cbdbA1015 PE=3 SV=1	Id.	2.17773	2.07797	2.04089		0.29627	0.378598	0.403651	Cellular community - prokaryotes; Folding, sorting and degradation; Membrane transport; Translation
Q3ZYB8	cbdbA1117	Carbamoyl-phosphate synthase small chain OS=Dehalococcoides mccartyi (strain CBDB1) GN=carA PE=3 SV=1	1.85788	1.97264	2.15793	2.01249	0.410816	0.165861	0.167467	0.161933	Amino acid metabolism; Nucleotide metabolism
Q3ZZA7	cbdbA278	50S ribosomal protein L19 OS=Dehalococcoides mccartyi (strain CBDB1) GN=rplS PE=3 SV=1	2.58052	2.86338	2.8901	2.7361	0.235899	0.265885	0.171025	0.118242	Translation
Q3ZYJ9	cbdbA1256	UPF0234 protein cbdbA1256 OS=Dehalococcoides mccartyi (strain CBDB1) GN=cbdbA1256 PE=3 SV=1	1.79414	2.38358	2.58756	2.00521	0.320567	0.528427	0.196889	0.45472	Cellular processes and signaling
Q3ZXC8	cbdbA714	LL-diaminopimelate aminotransferase OS=Dehalococcoides mccartyi (strain CBDB1) GN=dapL PE=3 SV=1	1.88514	2.17982	2.44158	2.08924	0.938033	0.510474	0.034678	0.560681	Amino acid metabolism
Q3ZZ42	cbdbA1465	Uncharacterized protein OS=Dehalococcoides mccartyi (strain CBDB1) GN=cbdbA1465 PE=4 SV=1	2.5054	2.63929	2.22192	2.19467	0.0762606	0.0585504	0.344966	0.482734
Q3ZY17	cbdbA1016	Uncharacterized protein OS=Dehalococcoides mccartyi (strain CBDB1) GN=cbdbA1016 PE=4 SV=1	1.4488	2.40923	2.42901	2.15547	0.213715	0.589916	0.384474	0.529181
Q3ZZM3	cbdbA440	50S ribosomal protein L4 OS=Dehalococcoides mccartyi (strain CBDB1) GN=rplD PE=3 SV=1	2.22182	2.73146	2.9495	2.6599	0.373887	0.563471	0.0602993	0.0915321	Translation
Q3ZYL9	cbdbA1291	Transcriptional regulator, AsnC family OS=Dehalococcoides mccartyi (strain CBDB1) GN=cbdbA1291 PE=4 SV=1	1.6457	2.44421	2.67847	2.09572	0.557296	0.336858	0.192973	0.705283
Q3ZW63	cbdbA1675	LemA family protein OS=Dehalococcoides mccartyi (strain CBDB1) GN=cbdbA1675 PE=4 SV=1	2.01592	2.62936	2.74512	2.34872	0.0273001	0.316303	0.082563	0.39234	Poorly characterized
Q3ZWW9	cbdbA565	Uncharacterized protein OS=Dehalococcoides mccartyi (strain CBDB1) GN=cbdbA565 PE=4 SV=1	2.39425	2.56652	2.50309	2.53133	0.277959	0.0347372	0.243326	0.365944
Q3ZY14	cbdbA1018	30S ribosomal protein S18 OS=Dehalococcoides mccartyi (strain CBDB1) GN=rpsR PE=3 SV=1	2.74575	2.93896	2.87153	2.65868	0.289938	0.261399	0.222785	0.336784	Translation
Q3ZXN4	cbdbA861	Aminopeptidase protein OS=Dehalococcoides mccartyi (strain CBDB1) GN=cbdbA861 PE=4 SV=1	2.56282	2.53643	2.54701	2.35041	0.153387	0.435247	0.107928	0.393633	Enzyme families
Q3ZWN0	cbdbA170	Putative [Fe] hydrogenase, HymB subunit OS=Dehalococcoides mccartyi (strain CBDB1) GN=hymB PE=4 SV=1	1.96375	2.43483	2.54864	1.79336	0.311811	0.193939	0.118191	0.804996	Energy metabolism
Q3ZZU5	cbdbA530	Uncharacterized protein OS=Dehalococcoides mccartyi (strain CBDB1) GN=cbdbA530 PE=4 SV=1	1.76942	2.37733	2.45615	Id.	0.288189	0.532462	0.296375		Poorly characterized
Q3ZZU0	cbdbA535	ATP synthase subunit delta OS=Dehalococcoides mccartyi (strain CBDB1) GN=atpH PE=3 SV=1	2.14212	2.63072	2.7213	2.31663	0.228553	0.431979	0.239469	0.316339	Energy metabolism
Q3ZZQ7	cbdbA455	30S ribosomal protein S5 OS=Dehalococcoides mccartyi (strain CBDB1) GN=rpsE PE=3 SV=1	2.84684	3.00664	2.79605	2.36756	0.105075	0.0288343	0.132292	1.05386	Translation
Q3ZY28	cbdbA1058	Glutamine amidotransferase, class II OS=Dehalococcoides mccartyi (strain CBDB1) GN=cbdbA1058 PE=4 SV=1	2.33759	2.50945	2.20796	2.34391	0.127251	0.0754541	0.0725386	0.250715
Q3ZZN5	cbdbA478	Uncharacterized protein OS=Dehalococcoides mccartyi (strain CBDB1) GN=cbdbA478 PE=4 SV=1	1.57074	1.88131	1.5708	1.22827	0.270419	0.134483	0.104054	0.522616	Poorly characterized
Q3ZZI5	cbdbA427	3-phosphoshikimate 1-carboxyvinyltransferase OS=Dehalococcoides mccartyi (strain CBDB1) GN=aroA PE=3 SV=1	2.17639	2.56954	2.7137	2.44558	0.316567	0.0653829	0.0725542	0.216107	Amino acid metabolism
Q3ZXP6	cbdbA848	Hydrogenase subunit HymC OS=Dehalococcoides mccartyi (strain CBDB1) GN=cbdbA848 PE=4 SV=1	2.19567	2.48124	2.50766	2.23071	0.109566	0.204899	0.0676656	0.166901
Q3ZYA0	cbdbA1137	DNA mismatch repair protein MutS OS=Dehalococcoides mccartyi (strain CBDB1) GN=mutS PE=3 SV=1	1.36156	1.78967	1.88422	1.42007	0.0524743	0.0251455	0.11992	0.380438	Replication and repair
Q3ZYT2	cbdbA1326	Putative dnaK suppressor protein OS=Dehalococcoides mccartyi (strain CBDB1) GN=cbdbA1326 PE=4 SV=1	1.44967	2.01624	2.55065	1.64491	0.215368	0.531406	0.167617	0.611345
Q3ZXQ3	cbdbA895	Branched chain amino acid ABC transporter,ATP-binding protein OS=Dehalococcoides mccartyi (strain CBDB1) GN=cbdbA895 PE=3 SV=1	1.819	2.05634	1.84034	1.76372	0.191434	0.0418498	0.0404309	0.0665956	Cellular community - prokaryotes; Membrane transport
Q3ZZ80	cbdbA1519	Putative CRISPR-associated protein OS=Dehalococcoides mccartyi (strain CBDB1) GN=cbdbA1519 PE=4 SV=1	1.61087	2.11469	2.20316	Id.	0.221861	0.150351	0.0830561		Transport and catabolism
Q3ZYP9	cbdbA1310	Twitching mobility protein OS=Dehalococcoides mccartyi (strain CBDB1) GN=pilT PE=4 SV=1	1.73663	1.93379	1.81	1.80938	0.0745165	0.0336925	0.139226	0.3074	Cell motility; Membrane transport
Q3ZYU0	cbdbA1372	Chaperone protein DnaJ OS=Dehalococcoides mccartyi (strain CBDB1) GN=dnaJ PE=3 SV=1	n.d.	1.65435	1.87161	Id.		0.0389149	0.170328		Folding, sorting and degradation; Translation
Q3ZW62	cbdbA1677	Protease HtpX homolog OS=Dehalococcoides mccartyi (strain CBDB1) GN=htpX PE=3 SV=1	1.41405	1.84647	1.83461	Id.	0.0534037	0.42882	0.321873		Enzyme families
Q3ZZQ3	cbdbA459	Adenylate kinase OS=Dehalococcoides mccartyi (strain CBDB1) GN=adk PE=3 SV=1	1.2738	1.96649	2.05377	1.37903	0.203603	0.493431	0.091856	1.19604	Metabolism of cofactors and vitamins; Nucleotide metabolism; Transport and catabolism
Q3ZYX5	cbdbA1385	tRNA(Ile)-lysidine synthase OS=Dehalococcoides mccartyi (strain CBDB1) GN=tilS PE=3 SV=1	1.95283	1.91281	2.04793	1.96715	0.154824	0.395816	0.147919	0.16205	Translation
Q3ZYQ0	cbdbA1309	Putative type IV pilus assembly family protein OS=Dehalococcoides mccartyi (strain CBDB1) GN=cbdbA1309 PE=4 SV=1	2.1371	2.14421	2.33486	1.84926	0.337509	0.176359	0.0108341	0.746638	Cell motility; Membrane transport
Q3ZWI3	cbdbA104	Putative type I restriction-modification system methylation subunit OS=Dehalococcoides mccartyi (strain CBDB1) GN=cbdbA104 PE=4 SV=1	1.0415	1.75007	1.47177	1.6345	0.443162	0.0969702	0.0892409	0.0231764	Transport and catabolism
Q3ZX28	cbdbA608	Ribonucleotide reductase OS=Dehalococcoides mccartyi (strain CBDB1) GN=nrd PE=4 SV=1	1.79888	1.88289	2.14672	1.71461	0.411362	0.520511	0.164996	0.76783	Nucleotide metabolism; Replication and repair
Q3ZX03	cbdbA583	Tyrosine--tRNA ligase OS=Dehalococcoides mccartyi (strain CBDB1) GN=tyrS PE=3 SV=1	0.791305	1.62946	1.47372	Id.	0.274667	0.18318	0.0924528		Amino acid metabolism; Translation
Q3ZW57	cbdbA1684	AIR synthase domain protein OS=Dehalococcoides mccartyi (strain CBDB1) GN=cbdbA1684 PE=4 SV=1	1.64549	2.54413	2.53087	1.95725	0.275421	0.0946339	0.0262195	0.348697
Q3ZZQ8	cbdbA454	50S ribosomal protein L18 OS=Dehalococcoides mccartyi (strain CBDB1) GN=rplR PE=3 SV=1	2.34002	2.54402	2.35191	2.36743	0.308466	0.156762	0.0900917	0.13651	Translation
Q3ZWH9	cbdbA108	Putative helicase (Snf2 family) OS=Dehalococcoides mccartyi (strain CBDB1) GN=cbdbA108 PE=4 SV=1	Id.	1.24874	1.55478	1.33925		0.0704121	0.299606	0.393539
Q3ZW44	cbdbA1639	Prephenate dehydratase OS=Dehalococcoides mccartyi (strain CBDB1) GN=pheA PE=4 SV=1	1.40885	2.1736	2.301	1.76352	0.23393	0.292966	0.118661	0.350737	Amino acid metabolism
Q3ZWA9	cbdbA15	Uncharacterized protein OS=Dehalococcoides mccartyi (strain CBDB1) GN=cbdbA15 PE=4 SV=1	2.1513	2.06762	2.24043	2.12893	0.0379379	0.25894	0.120905	0.206
Q3ZZK7	cbdbA397	UvrABC system protein B OS=Dehalococcoides mccartyi (strain CBDB1) GN=uvrB PE=3 SV=1	1.58753	1.68137	1.55218	1.49281	0.0284599	0.126041	0.0993279	0.094696	Replication and repair
Q3ZYX8	cbdbA1382	Putative nicotinate-nucleotide pyrophosphorylase OS=Dehalococcoides mccartyi (strain CBDB1) GN=pncB PE=4 SV=1	1.56459	1.96124	2.22451	1.87978	0.0539372	0.324226	0.0808265	0.340622	Metabolism of cofactors and vitamins
Q3ZZG8	cbdbA385	Sensor histidine kinase OS=Dehalococcoides mccartyi (strain CBDB1) GN=cbdbA385 PE=4 SV=1	Id.	2.13264	2.12929	1.54289		0.0685729	0.0362773	0.596377
Q3ZY24	cbdbA1006	Acyl-CoA synthetase (AMP-forming) / AMP-acid ligase OS=Dehalococcoides mccartyi (strain CBDB1) GN=cbdbA1006 PE=4 SV=1	Id.	1.64594	1.68544	1.15303		0.453458	0.105904	0.755972	Cell growth and death; Cellular community - prokaryotes; Lipid metabolism; Transport and catabolism
Q3ZX08	cbdbA577	DNA ligase OS=Dehalococcoides mccartyi (strain CBDB1) GN=ligA PE=3 SV=1	1.61981	1.60009	1.29602	1.50951	0.183022	0.119264	0.245312	0.136405	Replication and repair
Q3ZX54	cbdbA641	Nicotinate-nucleotide--dimethylbenzimidazole phosphoribosyltransferase OS=Dehalococcoides mccartyi (strain CBDB1) GN=cobT PE=3 SV=1	n.d.	1.65547	1.5651	Id.		0.323861	0.231481		Metabolism of cofactors and vitamins
Q3ZXY6	cbdbA999	Uncharacterized protein OS=Dehalococcoides mccartyi (strain CBDB1) GN=cbdbA999 PE=4 SV=1	1.80311	2.29081	2.46615	1.82598	0.185371	0.488151	0.0189668	0.880493
Q3ZZD1	cbdbA309	Inorganic pyrophosphatase OS=Dehalococcoides mccartyi (strain CBDB1) GN=ppa PE=3 SV=1	1.88637	2.54085	2.50044	2.39625	0.376755	0.278765	0.114368	0.16165	Energy metabolism
Q3ZYH9	cbdbA1224	Gamma-glutamyl phosphate reductase OS=Dehalococcoides mccartyi (strain CBDB1) GN=proA PE=3 SV=1	1.32463	1.80236	2.30579	Id.	0.250122	0.373321	0.149525		Amino acid metabolism; Biosynthesis of other secondary metabolites
Q3ZWP1	cbdbA185	Sensor histidine kinase OS=Dehalococcoides mccartyi (strain CBDB1) GN=rdhC PE=4 SV=1	1.71951	1.84828	1.62639	Id.	0.974398	0.233974	0.267896
Q3ZZT4	cbdbA514	Replicative DNA helicase OS=Dehalococcoides mccartyi (strain CBDB1) GN=dnaB PE=4 SV=1	1.59884	2.0262	2.13154	1.71892	0.373969	0.0138165	0.203699	0.564042	Cell growth and death; Replication and repair
Q3ZYG4	cbdbA1179	Arginine biosynthesis bifunctional protein ArgJ OS=Dehalococcoides mccartyi (strain CBDB1) GN=argJ PE=3 SV=1	1.59726	2.20846	2.27726	1.59282	0.151895	0.343821	0.128247	0.529862	Amino acid metabolism
Q3ZZL4	cbdbA449	50S ribosomal protein L14 OS=Dehalococcoides mccartyi (strain CBDB1) GN=rplN PE=3 SV=1	2.54222	3.00507	2.79921	2.6379	0.157055	0.0948689	0.0671314	0.591025	Translation
Q3ZZW6	cbdbA1734	Bisphosphoglycerate-independent phosphoglycerate mutase OS=Dehalococcoides mccartyi (strain CBDB1) GN=cbdbA1734 PE=4 SV=1	1.69793	1.78544	2.01801	1.89727	0.0783164	0.439511	0.142299	0.142729	Amino acid metabolism; Carbohydrate metabolism; Energy metabolism
Q3ZXD2	cbdbA761	Putative K(+)-stimulated pyrophosphate-energized sodium pump OS=Dehalococcoides mccartyi (strain CBDB1) GN=hppA PE=3 SV=1	1.22814	2.32863	2.40439	Id.	0.284729	0.373111	0.157303		Energy metabolism
Q3ZWG8	cbdbA124	DegV family protein OS=Dehalococcoides mccartyi (strain CBDB1) GN=cbdbA124 PE=4 SV=1	1.20259	2.26098	2.32694	1.65266	0.125412	0.409356	0.240526	0.789226
Q3ZWX9	cbdbA555	Lysine--tRNA ligase OS=Dehalococcoides mccartyi (strain CBDB1) GN=lysS PE=3 SV=1	1.29649	2.08204	2.11587	1.83764	0.117001	0.475361	0.168343	0.327294	Amino acid metabolism; Translation
Q3ZZB6	cbdbB11	Uncharacterized protein OS=Dehalococcoides mccartyi (strain CBDB1) GN=cbdbA328.1 PE=4 SV=1	2.66206	2.29263	2.15296	2.40717	0.0246991	0.134132	0.119648	0.230308
Q3ZYB9	cbdbA1114	Dihydroorotase OS=Dehalococcoides mccartyi (strain CBDB1) GN=pyrC PE=3 SV=1	1.35784	1.84693	2.03189	1.43106	0.20357	0.168803	0.129219	0.302338	Nucleotide metabolism
Q3ZXK4	cbdbA841	Elongation factor 4 OS=Dehalococcoides mccartyi (strain CBDB1) GN=lepA PE=3 SV=1	1.63362	1.59747	1.47542	1.75737	0.295081	0.13838	0.104959	0.145049
Q3ZXS9	cbdbA912	Superoxide dismutase OS=Dehalococcoides mccartyi (strain CBDB1) GN=sodA PE=3 SV=1	2.69046	2.26374	2.06327	2.5366	0.140382	0.537619	0.25442	0.325954	Signal transduction; Transport and catabolism
Q3ZXX2	cbdbA962	Uncharacterized protein OS=Dehalococcoides mccartyi (strain CBDB1) GN=cbdbA962 PE=4 SV=1	2.48215	2.22014	2.07883	2.18381	0.0469754	0.132158	0.253642	0.0936721
Q3ZY19	cbdbA1014	Putative SpoIIIJ-associated protein Jag OS=Dehalococcoides mccartyi (strain CBDB1) GN=cbdbA1014 PE=4 SV=1	2.38287	2.67464	2.43233	2.40703	0.0864199	0.0797378	0.1493	0.0382505	Cellular processes and signaling
Q3ZYZ4	cbdbA1417	Uncharacterized protein OS=Dehalococcoides mccartyi (strain CBDB1) GN=cbdbA1417 PE=4 SV=1	1.93093	2.02536	2.27726	1.85759	0.343526	0.0787543	0.0501826	0.328064
Q3ZZF0	cbdbA351	3-dehydroquinate synthase OS=Dehalococcoides mccartyi (strain CBDB1) GN=aroB PE=3 SV=1	1.96921	2.28402	1.44019	1.88089	0.333077	0.0721393	0.353166	0.313495	Amino acid metabolism
Q3ZZC9	cbdbA311	4-hydroxy-3-methylbut-2-en-1-yl diphosphate synthase OS=Dehalococcoides mccartyi (strain CBDB1) GN=ispG PE=3 SV=1	0.901169	1.94626	2.08153	1.76517	0.99727	0.465995	0.0404848	0.0299272	Metabolism of terpenoids and polyketides
Q3ZZR8	cbdbA503	Glutamine--fructose-6-phosphate aminotransferase [isomerizing] OS=Dehalococcoides mccartyi (strain CBDB1) GN=glmS PE=3 SV=1	1.68208	1.66512	1.58406	1.5009	0.335138	0.345203	0.238341	0.0529615	Amino acid metabolism; Carbohydrate metabolism; Enzyme families
Q3ZY67	cbdbA1069	Cob(I)alamin adenosyltransferase OS=Dehalococcoides mccartyi (strain CBDB1) GN=cobA PE=4 SV=1	2.01386	1.99416	1.94875	1.77093	0.0322131	0.246158	0.146913	0.0887852	Metabolism of cofactors and vitamins
Q3ZZQ5	cbdbA457	50S ribosomal protein L15 OS=Dehalococcoides mccartyi (strain CBDB1) GN=rplO PE=3 SV=1	2.86416	3.02687	2.95147	2.79639	0.118641	0.0526369	0.0668688	0.132768	Translation
Q3ZWX3	cbdbA561	Recombination protein RecR OS=Dehalococcoides mccartyi (strain CBDB1) GN=recR PE=3 SV=1	2.18857	2.1427	2.02797	1.78014	0.420569	0.302545	0.0811499	0.00739675	Replication and repair
Q3ZXC5	cbdbA717	Triosephosphate isomerase OS=Dehalococcoides mccartyi (strain CBDB1) GN=tpiA PE=3 SV=1	1.85083	2.23214	2.26156	2.136	0.431343	0.137934	0.0790007	0.140828	Carbohydrate metabolism; Energy metabolism; Transport and catabolism
Q3ZX41	cbdbA659	Iron-sulfur cluster binding protein OS=Dehalococcoides mccartyi (strain CBDB1) GN=cbdbA659 PE=4 SV=1	1.64001	1.68171	1.98045	1.96425	0.270284	0.073213	0.153237	0.129672
Q3ZY85	cbdbA1102	6,7-dimethyl-8-ribityllumazine synthase OS=Dehalococcoides mccartyi (strain CBDB1) GN=ribH PE=3 SV=1	2.677	2.79131	2.83428	2.72349	0.0866595	0.0575818	0.0532281	0.253222	Metabolism of cofactors and vitamins
Q3ZZL2	cbdbA451	50S ribosomal protein L5 OS=Dehalococcoides mccartyi (strain CBDB1) GN=rplE PE=3 SV=1	2.37368	2.64485	2.52149	2.14799	0.493247	0.0599579	0.363405	0.433845	Translation
Q3ZY11	cbdbA1021	Conserved domain protein OS=Dehalococcoides mccartyi (strain CBDB1) GN=cbdbA1021 PE=4 SV=1	2.4272	2.38362	2.60942	2.31555	0.151299	0.14397	0.226871	0.359427
Q3ZYA5	cbdbA1132	Uncharacterized protein OS=Dehalococcoides mccartyi (strain CBDB1) GN=cbdbA1132 PE=4 SV=1	n.d.	2.51711	2.4604	Id.		0.0290649	0.105305
Q3ZYV2	cbdbA1357	Chaperone protein DnaJ OS=Dehalococcoides mccartyi (strain CBDB1) GN=dnaJ PE=3 SV=1	n.d.	2.52086	2.22713	Id.		0.0296561	0.079613		Folding, sorting and degradation; Translation
Q3ZZP9	cbdbA463	30S ribosomal protein S13 OS=Dehalococcoides mccartyi (strain CBDB1) GN=rpsM PE=3 SV=1	1.92365	2.83705	3.0422	2.37056	0.0599358	0.654548	0.14019	0.558876	Translation
Q3ZYX1	cbdbA1389	Probable hemolysin-related protein OS=Dehalococcoides mccartyi (strain CBDB1) GN=cbdbA1389 PE=4 SV=1	1.52031	2.05689	2.11677	1.76697	0.132516	0.309509	0.0768632	0.777722
Q3ZWK0	cbdbA148	Sensor histidine kinase OS=Dehalococcoides mccartyi (strain CBDB1) GN=cbdbA148 PE=4 SV=1	n.d.	1.63328	1.23358	Id.		0.0516738	0.331446
Q3ZWC1	cbdbA68	Queuine tRNA-ribosyltransferase OS=Dehalococcoides mccartyi (strain CBDB1) GN=tgt PE=3 SV=1	Id.	2.17087	1.80456	2.19523		0.271687	0.258668	0.585889	Translation
Q3ZYW5	cbdbA1397	Hydrogenase accessory protein HypB OS=Dehalococcoides mccartyi (strain CBDB1) GN=hypB PE=4 SV=1	1.39994	2.28934	2.49791	1.91694	0.506261	0.341182	0.0914533	0.535865	Folding, sorting and degradation
Q3ZYV5	cbdbA1354	GTPase Der OS=Dehalococcoides mccartyi (strain CBDB1) GN=engA PE=3 SV=1	1.29396	1.84283	1.99639	1.69225	0.513517	0.317476	0.0650756	0.298684	Translation
Q3ZZG7	cbdbA386	DNA-binding response regulator, LuxR family OS=Dehalococcoides mccartyi (strain CBDB1) GN=cbdbA386 PE=4 SV=1	2.23482	2.32293	2.46886	2.25738	0.461825	0.240229	0.170658	0.166371
Q3ZZL3	cbdbA450	50S ribosomal protein L24 OS=Dehalococcoides mccartyi (strain CBDB1) GN=rplX PE=3 SV=1	2.2211	2.66537	2.83586	2.5591	0.392311	0.313862	0.217836	0.193841	Translation
Q3ZZF2	cbdbA349	Putative ubiquinone/menaquinone biosynthesis methlytransferase UbiE OS=Dehalococcoides mccartyi (strain CBDB1) GN=cbdbA349 PE=4 SV=1	1.66178	2.42888	2.26539	2.03199	0.0865689	0.369569	0.197846	0.601488	Metabolism of cofactors and vitamins
Q3ZXX7	cbdbA957	50S ribosomal protein L11 OS=Dehalococcoides mccartyi (strain CBDB1) GN=rplK PE=3 SV=1	2.75854	2.96742	3.0635	2.59628	0.247323	0.0981322	0.0707415	0.688512	Translation
Q3ZZX0	cbdbA1729	TPR domain protein OS=Dehalococcoides mccartyi (strain CBDB1) GN=cbdbA1729 PE=4 SV=1	2.1279	2.02571	2.68793	2.14312	0.312251	0.866667	0.0311568	0.412435
Q3ZYG9	cbdbA1237	GTP-binding protein TypA OS=Dehalococcoides mccartyi (strain CBDB1) GN=typA PE=4 SV=1	1.35471	1.80339	1.31046	1.60835	0.0901281	0.163694	0.41598	0.0878139	Cellular processes and signaling
Q3ZZJ9	cbdbA407	3-isopropylmalate dehydratase small subunit OS=Dehalococcoides mccartyi (strain CBDB1) GN=leuD PE=3 SV=1	2.98849	2.96762	2.82219	2.59181	0.294281	0.0303026	0.0371286	0.186952	Amino acid metabolism; Carbohydrate metabolism
Q3ZZ06	cbdbA1455	Putative reductive dehalogenase OS=Dehalococcoides mccartyi (strain CBDB1) GN=rdhA PE=4 SV=1	Id.	1.86999	1.58984	Id.		0.283955	0.777079
Q3ZZL0	cbdbA452	30S ribosomal protein S8 OS=Dehalococcoides mccartyi (strain CBDB1) GN=rpsH PE=3 SV=1	2.15523	2.59235	2.56576	2.33291	0.182939	0.55581	0.142168	0.215217	Translation
Q3ZZD3	cbdbA307	Phenylalanine--tRNA ligase alpha subunit OS=Dehalococcoides mccartyi (strain CBDB1) GN=pheS PE=3 SV=1	1.84079	2.31614	2.36974	1.77386	0.238383	0.254823	0.083475	0.23055	Amino acid metabolism; Translation
Q67B80	cbdbA1624	Putative reductive dehalogenase OS=Dehalococcoides mccartyi (strain CBDB1) GN=rdhA PE=4 SV=1	n.d.	n.d.	Id.	n.d.
Q3ZXQ6	cbdbA892	Branched-chain amino acid ABC transporter,ATP-binding protein OS=Dehalococcoides mccartyi (strain CBDB1) GN=cbdbA892 PE=4 SV=1	1.70398	1.9188	1.88551	1.59514	0.332207	0.217482	0.115498	0.378221	Cellular community - prokaryotes; Membrane transport
Q3ZYT4	cbdbA1323	NADPH-dependent FMN reductase OS=Dehalococcoides mccartyi (strain CBDB1) GN=cbdbA1323 PE=4 SV=1	2.03992	2.27187	2.12242	2.21287	0.309562	0.0267228	0.282085	0.146169
Q3ZY81	cbdbA1106	Hypothetical periplasmic protein OS=Dehalococcoides mccartyi (strain CBDB1) GN=cbdbA1106 PE=4 SV=1	1.64215	2.33016	2.48435	1.95921	0.0564265	0.360413	0.0321988	0.428454	Poorly characterized
Q3ZW73	cbdbA1711	UPF0145 protein cbdbA1711 OS=Dehalococcoides mccartyi (strain CBDB1) GN=cbdbA1711 PE=3 SV=1	2.15167	2.49328	2.46136	2.3335	0.440017	0.146367	0.231693	0.0763119
Q3ZZT3	cbdbA481	Uncharacterized protein OS=Dehalococcoides mccartyi (strain CBDB1) GN=cbdbA481 PE=4 SV=1	2.33574	1.94755	1.56358	2.12389	0.113863	0.395891	0.219791	0.472949
Q3ZYW2	cbdbA1401	Hydrogenase expression/formation protein HypD OS=Dehalococcoides mccartyi (strain CBDB1) GN=hypD PE=4 SV=1	Id.	1.89893	1.95118	1.53264		0.244525	0.218394	0.809521	Genetic information processing
Q3ZZP2	cbdbA470	30S ribosomal protein S9 OS=Dehalococcoides mccartyi (strain CBDB1) GN=rpsI PE=3 SV=1	2.86861	3.0771	2.9415	3.04919	0.200896	0.0588946	0.102409	0.0777174	Translation
Q3ZZ43	cbdbA1463	Peptide ABC transporter, periplasmic peptide-binding protein OS=Dehalococcoides mccartyi (strain CBDB1) GN=cbdbA1463 PE=4 SV=1	1.93546	2.48528	2.5878	2.30478	0.309332	0.503471	0.241917	0.40537	Cellular community - prokaryotes; Membrane transport
Q3ZWT4	cbdbA227	Uncharacterized protein OS=Dehalococcoides mccartyi (strain CBDB1) GN=cbdbA227 PE=4 SV=1	1.27522	2.08932	2.22428	1.91993	0.224015	0.662001	0.190221	0.445387
Q3ZWN3	cbdbA167	Phosphate-specific transport system accessory protein PhoU OS=Dehalococcoides mccartyi (strain CBDB1) GN=phoU PE=3 SV=1	1.8794	1.91309	2.22326	2.20051	0.346984	0.0988407	0.111042	0.173594	Cellular processes and signaling
Q3ZZJ0	cbdbA419	NAD kinase OS=Dehalococcoides mccartyi (strain CBDB1) GN=nadK PE=3 SV=1	2.36038	2.08474	2.02293	1.47164	0.12564	0.0196702	0.153571	0.648092	Metabolism of cofactors and vitamins
Q3ZWB0	cbdbA14	Orotidine 5'-phosphate decarboxylase OS=Dehalococcoides mccartyi (strain CBDB1) GN=pyrF PE=3 SV=1	1.69617	1.96546	1.86213	1.61894	0.561549	0.067426	0.182188	0.0863554	Nucleotide metabolism
Q3ZXZ7	cbdbA983	Uncharacterized protein OS=Dehalococcoides mccartyi (strain CBDB1) GN=cbdbA983 PE=4 SV=1	1.87067	2.53197	2.89299	Id.	0.38937	0.674183	0.0478976
Q3ZY73	cbdbA1061	Iron-sulfur cluster-binding protein OS=Dehalococcoides mccartyi (strain CBDB1) GN=cbdbA1061 PE=4 SV=1	2.03684	2.45195	2.52923	2.14765	0.0534701	0.444883	0.0888308	0.147219	Energy metabolism; Xenobiotics biodegradation and metabolism
Q3ZZ94	cbdbA294	Uncharacterized protein OS=Dehalococcoides mccartyi (strain CBDB1) GN=cbdbA294 PE=4 SV=1	2.46668	2.81856	2.87412	2.4563	0.139348	0.276918	0.114208	0.394374
Q3ZYK7	cbdbA1248	Putative hydrolase OS=Dehalococcoides mccartyi (strain CBDB1) GN=cbdbA1248 PE=4 SV=1	1.89964	1.98023	1.71995	1.75719	0.138925	0.124849	0.190184	0.419566
Q3ZW58	cbdbA1683	SAM-dependent methyltransferase UbiE/COQ5 family OS=Dehalococcoides mccartyi (strain CBDB1) GN=cbdbA1683 PE=4 SV=1	1.37803	1.83591	1.80067	1.86856	0.437271	0.222135	0.222716	0.144465	Metabolism of cofactors and vitamins
Q3ZZS3	cbdbA494	PmbA OS=Dehalococcoides mccartyi (strain CBDB1) GN=cbdbA494 PE=4 SV=1	Id.	1.91334	1.87326	1.96724		0.068208	0.233834	0.00103224	Enzyme families
Q3ZXI6	cbdbA805	3-isopropylmalate dehydratase small subunit OS=Dehalococcoides mccartyi (strain CBDB1) GN=leuD PE=3 SV=1	2.78176	2.85256	2.70425	2.6552	0.133896	0.0788496	0.129713	0.0873793	Amino acid metabolism; Carbohydrate metabolism
Q3ZZT1	cbdbA484	Methylthioribose-1-phosphate isomerase OS=Dehalococcoides mccartyi (strain CBDB1) GN=mtnA PE=3 SV=1	1.78092	1.89941	1.98579	1.91695	0.537153	0.249229	0.108071	0.250237	Amino acid metabolism
Q3ZZX5	cbdbA1722	N-acetyl-gamma-glutamyl-phosphate reductase OS=Dehalococcoides mccartyi (strain CBDB1) GN=argC PE=3 SV=1	1.94091	2.16937	2.26272	1.88281	0.0392505	0.0650305	0.117	0.335106	Amino acid metabolism
Q3ZWJ7	cbdbA151	DNA-binding response regulator OS=Dehalococcoides mccartyi (strain CBDB1) GN=cbdbA151 PE=4 SV=1	1.55279	2.23946	2.23112	1.90341	0.12077	0.234714	0.145758	0.274792
Q3ZZI8	cbdbA423	Prephenate dehydrogenase OS=Dehalococcoides mccartyi (strain CBDB1) GN=cbdbA423 PE=4 SV=1	1.90168	2.20524	2.09802	2.06851	0.259457	0.040673	0.0835109	0.109485	Amino acid metabolism; Biosynthesis of other secondary metabolites
Q3ZWB5	cbdbA9	Uncharacterized protein OS=Dehalococcoides mccartyi (strain CBDB1) GN=cbdbA9 PE=4 SV=1	2.08845	2.20297	1.85409	1.97357	0.137735	0.166263	0.190846	0.0875781
Q3ZZW9	cbdbA1730	NifU protein, homolog OS=Dehalococcoides mccartyi (strain CBDB1) GN=cbdbA1730 PE=4 SV=1	2.07679	2.49232	2.55068	2.33268	0.0596748	0.260831	0.07174	0.263166
Q3ZXJ0	cbdbA801	RNA-splicing ligase RtcB OS=Dehalococcoides mccartyi (strain CBDB1) GN=cbdbA801 PE=3 SV=1	Id.	1.04306	1.56497	Id.		0.237574	0.0486968		Translation
Q3ZXB8	cbdbA723	50S ribosomal protein L20 OS=Dehalococcoides mccartyi (strain CBDB1) GN=rplT PE=3 SV=1	1.95346	2.74062	2.60194	2.43203	0.0582649	0.215333	0.24425	0.0682524	Translation
Q3ZZ12	cbdbA1449	3-deoxy-D-arabino-heptulosonate 7-phosphate (DAHP) synthetase OS=Dehalococcoides mccartyi (strain CBDB1) GN=aroA PE=4 SV=1	1.02867	1.84598	2.22003	1.60032	0.680904	0.291684	0.0994869	0.636301	Amino acid metabolism
Q3ZYB5	cbdbA1120	GTP cyclohydrolase 1 OS=Dehalococcoides mccartyi (strain CBDB1) GN=folE PE=3 SV=1	1.6356	1.75574	1.89724	1.78244	0.315835	0.25181	0.248888	0.253168	Metabolism of cofactors and vitamins
Q3ZWH0	cbdbA122	Mrp family protein OS=Dehalococcoides mccartyi (strain CBDB1) GN=cbdbA122 PE=4 SV=1	Id.	1.83079	1.73748	1.68816		0.300834	0.254462	0.173731
Q3ZWC8	cbdbA58	Putative GTP-binding protein OS=Dehalococcoides mccartyi (strain CBDB1) GN=cbdbA58 PE=4 SV=1	n.d.	2.20714	1.98251	1.44442		0.316095	0.224676	0.451712	Translation
Q3ZXV7	cbdbA931	30S ribosomal protein S15 OS=Dehalococcoides mccartyi (strain CBDB1) GN=rpsO PE=3 SV=1	2.69339	2.80139	2.46209	2.66882	0.190953	0.0606315	0.223746	0.384325	Translation
Q3ZYN1	cbdbA1276	Phosphoribosyl-AMP cyclohydrolase OS=Dehalococcoides mccartyi (strain CBDB1) GN=hisI PE=4 SV=1	Id.	2.27581	2.2819	Id.		0.429547	0.0928732		Amino acid metabolism
Q3ZZ76	cbdbA1521	Uncharacterized protein OS=Dehalococcoides mccartyi (strain CBDB1) GN=cbdbA1521 PE=4 SV=1	1.86139	1.88383	1.60769	1.70193	0.0599196	0.292147	0.448182	0.234624	Transport and catabolism
Q3ZY12	cbdbA1020	30S ribosomal protein S6 OS=Dehalococcoides mccartyi (strain CBDB1) GN=rpsF PE=3 SV=1	2.43885	2.90767	2.74616	2.57454	0.108401	0.291728	0.166806	0.224615	Translation
Q3ZZM8	cbdbA434	30S ribosomal protein S12 OS=Dehalococcoides mccartyi (strain CBDB1) GN=rpsL PE=3 SV=1	2.95129	3.09694	3.14353	2.62267	0.120051	0.130675	0.0844189	0.467938	Translation
Q3ZY79	cbdbA1108	Orotate phosphoribosyltransferase OS=Dehalococcoides mccartyi (strain CBDB1) GN=pyrE PE=3 SV=1	1.73839	2.12304	2.28582	1.81783	0.328332	0.203555	0.115432	0.0868865	Nucleotide metabolism
Q3ZYS4	cbdbA1335	GGDEF domain OS=Dehalococcoides mccartyi (strain CBDB1) GN=cbdbA1335 PE=4 SV=1	1.24747	1.5813	1.451	1.78919	0.0441124	0.347317	0.486617	0.0937867
Q3ZWR4	cbdbA187	Putative reductive dehalogenase OS=Dehalococcoides mccartyi (strain CBDB1) GN=rdhA PE=4 SV=1	1.51261	n.d.	1.40877	Id.	0.340607		0.527594
Q3ZYI2	cbdbA1217	Serine protease, DegP OS=Dehalococcoides mccartyi (strain CBDB1) GN=cbdbA1217 PE=4 SV=1	2.1303	2.40592	2.61082	2.41416	0.104929	0.0427988	0.0819784	0.258495	Drug resistance; Enzyme families; Folding, sorting and degradation; Signal transduction
Q3ZY13	cbdbA1019	Single-stranded DNA-binding protein OS=Dehalococcoides mccartyi (strain CBDB1) GN=ssb PE=4 SV=1	1.71329	2.47473	2.75994	1.89165	0.296616	0.600808	0.228181	0.744401	Replication and repair; Translation
Q3ZZV7	cbdbA516	Thioredoxin reductase OS=Dehalococcoides mccartyi (strain CBDB1) GN=trxB PE=3 SV=1	1.51713	2.23255	2.34142	1.8669	0.401469	0.500225	0.200472	0.510592	Metabolism of other amino acids
Q3ZY71	cbdbA1063	Cysteine synthase OS=Dehalococcoides mccartyi (strain CBDB1) GN=cysK PE=3 SV=1	1.59472	1.76372	2.06326	1.8294	0.467861	0.39436	0.113017	0.346643	Amino acid metabolism; Energy metabolism
Q3ZZB3	cbdbA332	Uncharacterized protein OS=Dehalococcoides mccartyi (strain CBDB1) GN=cbdbA332 PE=4 SV=1	n.d.	2.35195	2.1191	Id.		0.204635	0.203165
Q3ZYY1	cbdbA1378	Phosphoribosylformylglycinamidine cyclo-ligase OS=Dehalococcoides mccartyi (strain CBDB1) GN=purM PE=3 SV=1	1.80525	1.96746	1.92272	2.10785	0.251314	0.241091	0.302937	0.056828	Nucleotide metabolism
Q3ZXD8	cbdbA752	Thymidylate kinase OS=Dehalococcoides mccartyi (strain CBDB1) GN=tmk PE=3 SV=1	1.96369	1.93024	1.90963	1.38685	0.0416252	0.17284	0.193317	0.570815	Nucleotide metabolism
Q3ZYF6	cbdbA1190	DegV family protein OS=Dehalococcoides mccartyi (strain CBDB1) GN=cbdbA1190 PE=4 SV=1	1.6907	2.22672	2.312	1.88232	0.0223012	0.365158	0.254947	0.464014
Q3ZYM9	cbdbA1278	1-(5-phosphoribosyl)-5-[(5-phosphoribosylamino)methylideneamino] imidazole-4-carboxamide isomerase OS=Dehalococcoides mccartyi (strain CBDB1) GN=hisA PE=3 SV=1	1.29132	2.00869	2.17522	1.79984	0.655491	0.282138	0.0414547	0.145213	Amino acid metabolism
Q3ZYJ1	cbdbA1204	Malonyl CoA-acyl carrier protein transacylase OS=Dehalococcoides mccartyi (strain CBDB1) GN=fabD PE=3 SV=1	1.49634	2.03552	2.08747	1.9681	0.424932	0.293499	0.0489713	0.0119096	Biosynthesis of other secondary metabolites; Lipid metabolism
Q3ZXM3	cbdbA819	Phosphoribosylamine--glycine ligase OS=Dehalococcoides mccartyi (strain CBDB1) GN=purD PE=3 SV=1	1.40133	1.63418	1.91497	Id.	0.886801	0.693695	0.208523		Nucleotide metabolism
Q3ZXL9	cbdbA824	Imidazoleglycerol-phosphate dehydratase OS=Dehalococcoides mccartyi (strain CBDB1) GN=hisB PE=3 SV=1	1.95928	2.33045	2.30908	1.99371	0.290063	0.156771	0.116782	0.29625	Amino acid metabolism
Q3ZYU2	cbdbA1370	Putative transaldolase OS=Dehalococcoides mccartyi (strain CBDB1) GN=tal PE=3 SV=1	2.13455	2.23719	2.08386	2.05973	0.186584	0.204846	0.108687	0.22574	Carbohydrate metabolism
Q3ZW15	cbdbA1613	Hypothetical upf0313 protein OS=Dehalococcoides mccartyi (strain CBDB1) GN=cbdbA1613 PE=4 SV=1	Id.	1.26123	1.28976	Id.		0.0817026	0.48315
Q3ZYA2	cbdbA1135	Acetyltransferase, GNAT family OS=Dehalococcoides mccartyi (strain CBDB1) GN=cbdbA1135 PE=4 SV=1	2.16909	1.77121	1.66962	2.13431	0.319326	0.0458321	0.54374	0.166452	Metabolism
Q3ZZC2	cbdbA320	Elongation factor Ts OS=Dehalococcoides mccartyi (strain CBDB1) GN=tsf PE=3 SV=1	2.62736	2.84899	2.78547	2.52087	0.224056	0.020545	0.150256	0.388397	Translation
Q3ZZT2	cbdbA482	S-methyl-5'-thioadenosine phosphorylase OS=Dehalococcoides mccartyi (strain CBDB1) GN=mtaP PE=3 SV=1	Id.	2.25786	2.20088	2.04467		0.209358	0.101987	0.331652	Amino acid metabolism
Q3ZY07	cbdbA1026	DNA repair protein RecN OS=Dehalococcoides mccartyi (strain CBDB1) GN=recN PE=3 SV=1	n.d.	1.68185	1.43979	Id.		0.0254894	0.461357		Replication and repair
Q3ZWT5	cbdbA226	ABC transporter, ATP-binding protein OS=Dehalococcoides mccartyi (strain CBDB1) GN=cbdbA226 PE=3 SV=1	n.d.	1.86867	1.69032	Id.		0.0439749	0.132233		Translation
Q3ZZI3	cbdbA368.1	Uncharacterized protein OS=Dehalococcoides mccartyi (strain CBDB1) GN=cbdbA368.1 PE=4 SV=1	2.65294	2.69474	2.68529	2.62975	0.168395	0.126576	0.0372178	0.273535
Q3ZWE0	cbdbA40	Uncharacterized protein OS=Dehalococcoides mccartyi (strain CBDB1) GN=cbdbA40 PE=4 SV=1	1.57299	1.67697	1.54832	1.68623	0.246603	0.0805314	0.17011	0.13142	Poorly characterized
Q3ZZV4	cbdbA520	Amidohydrolase family protein OS=Dehalococcoides mccartyi (strain CBDB1) GN=cbdbA520 PE=4 SV=1	1.7201	1.71767	1.91452	1.69389	0.221993	0.57395	0.327438	0.0820092
Q3ZYK6	cbdbA1249	ATPase, AAA family OS=Dehalococcoides mccartyi (strain CBDB1) GN=cbdbA1249 PE=4 SV=1	n.d.	1.21299	1.4594	Id.		0.270051	0.0400338		Genetic information processing
Q3ZYR5	cbdbA1348	DNA-directed DNA polymerase I OS=Dehalococcoides mccartyi (strain CBDB1) GN=polA PE=3 SV=1	n.d.	1.13359	1.19504	Id.		0.302995	0.261162		Nucleotide metabolism; Replication and repair
Q3ZZ75	cbdbA1522	Putative CRISPR-associated helicase Cas3 OS=Dehalococcoides mccartyi (strain CBDB1) GN=cas3 PE=4 SV=1	n.d.	1.13092	1.38607	Id.		0.180747	0.1933		Transport and catabolism
Q3ZXD7	cbdbA754	tRNA-specific 2-thiouridylase MnmA OS=Dehalococcoides mccartyi (strain CBDB1) GN=mnmA PE=3 SV=1	Id.	1.8878	1.79357	1.42881		0.0192845	0.0986338	0.33499	Folding, sorting and degradation; Translation
Q3ZYG3	cbdbA1180	Acetylglutamate kinase OS=Dehalococcoides mccartyi (strain CBDB1) GN=argB PE=3 SV=1	1.48104	1.86554	2.1746	1.63506	0.0891049	0.467632	0.313643	0.44749	Amino acid metabolism
Q3ZYD0	cbdbA1159	Peptidyl-prolyl cis-trans isomerase OS=Dehalococcoides mccartyi (strain CBDB1) GN=ppiB PE=3 SV=1	2.62898	2.73594	2.71355	2.58878	0.16802	0.234177	0.0613949	0.23458
Q3ZZW0	cbdbA1742	Methionyl-tRNA formyltransferase OS=Dehalococcoides mccartyi (strain CBDB1) GN=fmt PE=3 SV=1	1.49819	1.71422	1.99433	1.73823	0.173379	0.220605	0.0252727	0.267221	Metabolism of cofactors and vitamins; Translation
Q3ZXJ2	cbdbA799	Conserved domain protein OS=Dehalococcoides mccartyi (strain CBDB1) GN=cbdbA799 PE=4 SV=1	Id.	2.11347	1.94006	Id.		0.410924	0.0375801
Q3ZVS7	cbdbA1548	DNA-binding response regulator, LuxR family OS=Dehalococcoides mccartyi (strain CBDB1) GN=rdhD PE=4 SV=1	Id.	1.79997	1.74008	1.69464		0.13729	0.195425	0.186389
Q3ZZS2	cbdbA496	TldD OS=Dehalococcoides mccartyi (strain CBDB1) GN=cbdbA496 PE=4 SV=1	2.37468	2.16	1.99233	2.37389	0.266723	0.708927	0.190544	0.406854	Enzyme families
Q3ZXZ8	cbdbA982	Uncharacterized protein OS=Dehalococcoides mccartyi (strain CBDB1) GN=cbdbA982 PE=4 SV=1	2.43642	2.63759	2.96586	2.73318	0.112189	0.635871	0.09064	0.0753282
Q3ZX42	cbdbA658	Carbon monoxide dehydrogenase nickel-insertion accessory protein OS=Dehalococcoides mccartyi (strain CBDB1) GN=acsF PE=4 SV=1	1.44755	1.78232	1.68274	1.61028	0.0876557	0.226106	0.103967	0.230275	Cellular processes and signaling
Q3ZZW3	cbdbA1738	30S ribosomal protein S20 OS=Dehalococcoides mccartyi (strain CBDB1) GN=rpsT PE=3 SV=1	n.d.	2.45854	2.5728	Id.		0.291397	0.0881825		Translation
Q3ZZ15	cbdbA1444	Anthranilate phosphoribosyltransferase OS=Dehalococcoides mccartyi (strain CBDB1) GN=trpD PE=3 SV=1	1.92936	1.97874	1.61273	1.83786	0.738321	0.576047	0.28826	0.0537767	Amino acid metabolism
Q3ZZD5	cbdbA335	Heptaprenyl diphosphate synthase component II OS=Dehalococcoides mccartyi (strain CBDB1) GN=hepT PE=3 SV=1	1.53434	1.79101	1.74978	1.5091	0.0424466	0.0773524	0.110197	0.328195
Q3ZZ02	cbdbA1459	Peptide ABC transporter, ATP-binding protein OS=Dehalococcoides mccartyi (strain CBDB1) GN=cbdbA1459 PE=4 SV=1	1.28218	2.00265	1.75262	1.15511	0.0519289	0.606211	0.0854829	0.0778613
Q3ZY83	cbdbA1104	Riboflavin synthase, alpha subunit OS=Dehalococcoides mccartyi (strain CBDB1) GN=ribE PE=4 SV=1	1.86713	1.81433	1.71651	1.85032	0.415574	0.154605	0.150002	0.120441	Metabolism of cofactors and vitamins
Q3ZZN3	cbdbA429	Shikimate dehydrogenase (NADP(+)) OS=Dehalococcoides mccartyi (strain CBDB1) GN=aroE PE=3 SV=1	2.34544	2.37106	2.25412	1.98382	0.149972	0.28322	0.0467333	0.583582	Amino acid metabolism
Q3ZXA4	cbdbA689	Oxidoreductase, short chaindehydrogenase OS=Dehalococcoides mccartyi (strain CBDB1) GN=cbdbA689 PE=3 SV=1	2.24928	2.01859	1.8576	2.09599	0.363092	0.35012	0.398303	0.64365	Carbohydrate metabolism
Q3ZW59	cbdbA1681	Quinolinate synthase A OS=Dehalococcoides mccartyi (strain CBDB1) GN=nadA PE=3 SV=1	1.6395	1.83835	1.71747	1.56944	0.247335	0.0419258	0.342083	0.133815	Metabolism of cofactors and vitamins
Q3ZY97	cbdbA1113	Aspartate carbamoyltransferase OS=Dehalococcoides mccartyi (strain CBDB1) GN=pyrB PE=3 SV=1	1.56413	1.67144	1.75108	1.74344	0.253194	0.0179967	0.160653	0.0819356	Amino acid metabolism; Nucleotide metabolism
Q3ZYY7	cbdbA1426	Putative ribosomal subunit interface protein OS=Dehalococcoides mccartyi (strain CBDB1) GN=cbdbA1426 PE=4 SV=1	Id.	2.18538	2.932	Id.		0.173698	0.216858		Translation
Q3ZZJ1	cbdbA417	Acetyltransferase, GNAT family OS=Dehalococcoides mccartyi (strain CBDB1) GN=cbdbA417 PE=4 SV=1	1.51801	2.10852	2.16515	1.74154	0.139895	0.37425	0.0893125	0.437685	Amino acid metabolism
Q3ZW90	cbdbA1	Chromosomal replication initiator protein DnaA OS=Dehalococcoides mccartyi (strain CBDB1) GN=dnaA PE=3 SV=1	Id.	1.62385	1.49131	1.21407		0.247858	0.562608	0.413969	Cell growth and death; Replication and repair; Signal transduction
Q3ZZC0	cbdbA323	Phosphoribosylformylglycinamidine synthase subunit PurQ OS=Dehalococcoides mccartyi (strain CBDB1) GN=purQ PE=4 SV=1	Id.	1.50414	1.93973	1.31488		0.537282	0.00606154	0.59324	Nucleotide metabolism
Q3ZWU7	cbdbA268	Uncharacterized protein OS=Dehalococcoides mccartyi (strain CBDB1) GN=cbdbA268 PE=4 SV=1	1.58941	1.691	1.89351	1.2201	0.10465	0.0904563	0.0808769	0.279434
Q3ZWU8	cbdbA267	Uncharacterized protein OS=Dehalococcoides mccartyi (strain CBDB1) GN=cbdbA267 PE=4 SV=1	2.23262	2.13527	1.96155	2.19889	0.180622	0.0353635	0.312289	0.0416567
Q3ZWM2	cbdbA181	Putative threonine aldolase (COG2008) OS=Dehalococcoides mccartyi (strain CBDB1) GN=gly1 PE=4 SV=1	Id.	0.944996	1.79691	Id.		0.283635	0.363154		Amino acid metabolism
Q3ZZX2	cbdbA1727	Radical SAM domain protein OS=Dehalococcoides mccartyi (strain CBDB1) GN=cbdbA1727 PE=4 SV=1	1.49669	1.22129	1.22221	1.55265	0.040988	0.155598	0.339221	0.330932
Q3ZZJ2	cbdbA416	MutT OS=Dehalococcoides mccartyi (strain CBDB1) GN=cbdbA416 PE=4 SV=1	2.32946	2.41404	2.38951	2.41803	0.70159	0.208191	0.239686	0.53891	Nucleotide metabolism
Q3ZZT6	cbdbA539	ATP synthase epsilon chain OS=Dehalococcoides mccartyi (strain CBDB1) GN=atpC PE=3 SV=1	1.60827	2.46494	2.3835	1.68159	0.259449	0.151148	0.095233	0.441576	Energy metabolism
Q3ZZP5	cbdbA467	50S ribosomal protein L17 OS=Dehalococcoides mccartyi (strain CBDB1) GN=rplQ PE=3 SV=1	2.24354	2.83196	2.86345	2.54965	0.361873	0.484951	0.293346	0.277445	Translation
Q3ZXV5	cbdbA933	4-hydroxy-tetrahydrodipicolinate reductase OS=Dehalococcoides mccartyi (strain CBDB1) GN=dapB PE=3 SV=1	Id.	1.83992	2.01656	1.64591		0.203229	0.117739	0.542671	Amino acid metabolism; Biosynthesis of other secondary metabolites
Q3ZVZ8	cbdbA1635	Uncharacterized protein OS=Dehalococcoides mccartyi (strain CBDB1) GN=cbdbA1635 PE=4 SV=1	2.36878	2.99038	3.20906	2.42216	0.0714735	0.465291	0.111319	0.246163
Q3ZZH2	cbdbA380	Carbohydrate kinase, yjeF-family OS=Dehalococcoides mccartyi (strain CBDB1) GN=cbdbA380 PE=3 SV=1	1.38903	1.57866	1.84843	1.53826	0.0226821	0.196724	0.087089	0.0894033	Metabolism; Metabolism
Q3ZZF5	cbdbA344	Glycoprotease family protein OS=Dehalococcoides mccartyi (strain CBDB1) GN=cbdbA344 PE=4 SV=1	1.3793	1.47429	1.6189	Id.	0.338716	0.207559	0.239362
Q3ZWL0	cbdbA136	ABC transporter, ATP-binding protein OS=Dehalococcoides mccartyi (strain CBDB1) GN=cbdbA136 PE=3 SV=1	n.d.	1.41987	1.8011	1.38024		0.230528	0.0218068	0.584335
Q3ZZL7	cbdbA446	50S ribosomal protein L16 OS=Dehalococcoides mccartyi (strain CBDB1) GN=rplP PE=3 SV=1	2.13765	2.4927	2.49476	2.31079	0.622932	0.760502	0.141142	0.1694	Translation
Q3ZXD3	cbdbA759	Translin family protein OS=Dehalococcoides mccartyi (strain CBDB1) GN=cbdbA759 PE=4 SV=1	1.98561	2.21506	2.30163	2.30998	0.2551	0.0789286	0.0790861	0.0120189	Genetic information processing
Q3ZYN5	cbdbA1270	50S ribosomal protein L21 OS=Dehalococcoides mccartyi (strain CBDB1) GN=rplU PE=3 SV=1	2.33154	2.50368	1.47141	2.3811	0.121222	0.101405	0.680705	0.104158	Translation
Q3ZW91	cbdbA5	GTP pyrophosphokinase OS=Dehalococcoides mccartyi (strain CBDB1) GN=relA PE=3 SV=1	n.d.	1.64676	1.55526	1.52618		0.00555253	0.135711	0.64447	Nucleotide metabolism
Q3ZYL2	cbdbA1241	Fasciclin domain protein OS=Dehalococcoides mccartyi (strain CBDB1) GN=cbdbA1241 PE=4 SV=1	1.96376	1.95326	2.04249	2.19939	0.218653	0.29018	0.278032	0.0139941
Q3ZYF5	cbdbA1191	DegV family protein OS=Dehalococcoides mccartyi (strain CBDB1) GN=cbdbA1191 PE=4 SV=1	2.40507	2.07994	2.32096	2.46334	0.0387719	0.507307	0.12569	0.206752
Q3ZXP8	cbdbA872	Uncharacterized protein OS=Dehalococcoides mccartyi (strain CBDB1) GN=cbdbA872 PE=4 SV=1	1.76662	2.2933	2.27882	2.19182	0.231546	0.0549211	0.076055	0.0769178
Q3ZZR9	cbdbA500	Glucose-1-phosphate thymidylyltransferase OS=Dehalococcoides mccartyi (strain CBDB1) GN=cbdbA500 PE=4 SV=1	1.77919	1.45233	1.59702	1.34566	0.706701	0.654255	0.320605	0.278359	Biosynthesis of other secondary metabolites; Metabolism of terpenoids and polyketides
Q3ZW47	cbdbA1695	Sec-independent protein translocase protein TatA OS=Dehalococcoides mccartyi (strain CBDB1) GN=tatA PE=3 SV=1	n.d.	1.58665	1.50978	Id.		0.223987	0.508456		Folding, sorting and degradation; Membrane transport
Q3ZZE8	cbdbA353	SAM-dependent methyltransferase UbiE/COQ5 family OS=Dehalococcoides mccartyi (strain CBDB1) GN=cbdbA353 PE=4 SV=1	1.81432	1.84039	1.79537	1.77953	0.0280546	0.14959	0.428977	0.00731863	Metabolism of cofactors and vitamins
Q3ZZW5	cbdbA1735	MazG family protein OS=Dehalococcoides mccartyi (strain CBDB1) GN=cbdbA1735 PE=4 SV=1	n.d.	1.64846	1.41234	Id.		0.0547033	0.107573		Replication and repair
Q3ZX02	cbdbA584	Riboflavin biosynthesis protein RibF OS=Dehalococcoides mccartyi (strain CBDB1) GN=ribF PE=4 SV=1	n.d.	2.02557	2.06873	1.85861		0.2528	0.0269701	0.097112	Metabolism of cofactors and vitamins
Q3ZW75	cbdbA1709	HIT domain protein OS=Dehalococcoides mccartyi (strain CBDB1) GN=cbdbA1709 PE=4 SV=1	1.26415	1.76281	1.84941	1.57194	0.00657612	0.210322	0.439185	0.177129	Nucleotide metabolism
Q3ZY29	cbdbA1057	Imidazole glycerol phosphate synthase subunit HisF OS=Dehalococcoides mccartyi (strain CBDB1) GN=hisF PE=3 SV=1	Id.	2.01679	1.90378	1.8186		0.0601696	0.0824722	0.296912	Amino acid metabolism
Q3ZXT4	cbdbA906	NifU domain protein OS=Dehalococcoides mccartyi (strain CBDB1) GN=cbdbA906 PE=4 SV=1	Id.	1.67226	1.89836	Id.		0.0736559	0.136662		Metabolism
Q3ZWU2	cbdbA274	Protein translocase subunit SecD OS=Dehalococcoides mccartyi (strain CBDB1) GN=secD PE=3 SV=1	1.8273	2.26181	2.24319	1.9055	0.236033	0.232652	0.129763	0.468693	Folding, sorting and degradation; Membrane transport
Q3ZXY8	cbdbA995	Uncharacterized protein OS=Dehalococcoides mccartyi (strain CBDB1) GN=cbdbA995 PE=4 SV=1	Id.	2.25374	2.46025	Id.		0.347184	0.203947
Q3ZXB6	cbdbA725	Translation initiation factor IF-3 OS=Dehalococcoides mccartyi (strain CBDB1) GN=infC PE=3 SV=1	Id.	2.09406	2.01331	1.33064		0.125318	0.0679119	0.231305	Translation
Q3ZX27	cbdbA610	Response regulator OS=Dehalococcoides mccartyi (strain CBDB1) GN=cbdbA610 PE=4 SV=1	n.d.	1.88838	Id.	Id.		0.0218477
Q3ZZS4	cbdbA493	Uncharacterized protein OS=Dehalococcoides mccartyi (strain CBDB1) GN=cbdbA493 PE=4 SV=1	2.40708	1.87049	1.70345	Id.	0.235368	0.374207	0.220969		Poorly characterized
Q3ZW20	cbdbA1608	Sensor histidine kinase/response regulator OS=Dehalococcoides mccartyi (strain CBDB1) GN=cbdbA1608 PE=4 SV=1	Id.	1.47637	1.37976	Id.		0.147578	0.318757
Q3ZYV3	cbdbA1356	Glycerol-3-phosphate dehydrogenase [NAD(P)+] OS=Dehalococcoides mccartyi (strain CBDB1) GN=gpsA PE=3 SV=1	Id.	1.61705	1.71801	Id.		0.239492	0.125854		Lipid metabolism
Q3ZY31	cbdbA1054	Uncharacterized protein OS=Dehalococcoides mccartyi (strain CBDB1) GN=cbdbA1054 PE=4 SV=1	2.00721	2.40543	2.58746	2.24957	0.149574	0.36722	0.0793275	0.223428
Q3ZYF3	cbdbA1193	DegV family protein OS=Dehalococcoides mccartyi (strain CBDB1) GN=cbdbA1193 PE=4 SV=1	Id.	1.75215	1.73996	1.25447		0.276745	0.329569	0.40643
Q3ZYC6	cbdbA1164	Putative iron-sulfur flavoprotein OS=Dehalococcoides mccartyi (strain CBDB1) GN=cbdbA1164 PE=4 SV=1	1.64579	2.38108	2.19331	Id.	0.344118	0.536678	0.189747
Q3ZWW7	cbdbA567	Uncharacterized protein OS=Dehalococcoides mccartyi (strain CBDB1) GN=cbdbA567 PE=4 SV=1	2.83362	2.78294	2.28333	2.75509	0.0981314	0.00755334	0.873704	0.159461
Q3ZWF6	cbdbA83	DNA-binding response regulator OS=Dehalococcoides mccartyi (strain CBDB1) GN=rdhD PE=4 SV=1	1.60775	1.74678	1.63608	1.5985	0.0467372	0.0902683	0.295872	0.389873	Cellular community - prokaryotes; Signal transduction
Q3ZZ04	cbdbA1457	Thymidylate synthase ThyX OS=Dehalococcoides mccartyi (strain CBDB1) GN=thyX PE=3 SV=1	1.87459	2.14621	2.00123	1.81212	0.591199	0.0775568	0.095413	0.196634	Metabolism of cofactors and vitamins; Nucleotide metabolism
Q3ZZP8	cbdbA464	30S ribosomal protein S11 OS=Dehalococcoides mccartyi (strain CBDB1) GN=rpsK PE=3 SV=1	2.65823	3.00425	3.04133	2.76004	0.065493	0.215542	0.0251197	0.17044	Translation
Q3ZZG0	cbdbA368	Deoxyuridine 5'-triphosphatenucleotidohydrolase OS=Dehalococcoides mccartyi (strain CBDB1) GN=dut PE=4 SV=1	1.44754	1.7819	1.78364	1.82421	0.203192	0.128381	0.225147	0.0430585	Nucleotide metabolism; Replication and repair
Q3ZX09	cbdbA576	Peptidyl-tRNA hydrolase OS=Dehalococcoides mccartyi (strain CBDB1) GN=pth PE=3 SV=1	n.d.	1.33647	1.30583	1.27349		0.413309	0.0505579	0.0525638	Translation
Q3ZZB7	cbdbA328	Iron-sulfur cluster-binding protein, Rieske domain OS=Dehalococcoides mccartyi (strain CBDB1) GN=cbdbA328 PE=4 SV=1	1.50359	1.68392	2.03995	Id.	0.526813	0.246046	0.350648
Q3ZY44	cbdbA1040	Metallo-beta-lactamase family protein OS=Dehalococcoides mccartyi (strain CBDB1) GN=cbdbA1040 PE=4 SV=1	1.10726	1.41186	1.43629	Id.	0.214053	0.236094	0.394935		Genetic information processing
Q3ZZ98	cbdbA289	Uncharacterized protein OS=Dehalococcoides mccartyi (strain CBDB1) GN=cbdbA289 PE=4 SV=1	1.64422	1.71101	1.72631	1.567	0.142894	0.0557761	0.149725	0.000432522
Q3ZWL4	cbdbA130	Ni/Fe hydrogenase small subunit OS=Dehalococcoides mccartyi (strain CBDB1) GN=hupS PE=4 SV=1	2.52943	2.56626	2.67448	2.59852	0.152754	0.218734	0.11381	0.121512	Xenobiotics biodegradation and metabolism
Q3ZW95	cbdbA34	Universal stress family protein OS=Dehalococcoides mccartyi (strain CBDB1) GN=cbdbA34 PE=4 SV=1	2.26736	1.87208	1.90982	2.05603	0.0543066	0.466757	0.228574	0.350905
Q3ZYK3	cbdbA1253	Uncharacterized protein OS=Dehalococcoides mccartyi (strain CBDB1) GN=cbdbA1253 PE=4 SV=1	2.02733	1.98992	1.8433	1.92504	0.170801	0.290681	0.134829	0.364434	Cell motility
Q3ZZ14	cbdbA1445	Indole-3-glycerol phosphate synthase OS=Dehalococcoides mccartyi (strain CBDB1) GN=trpC PE=3 SV=1	Id.	1.83464	1.78728	1.55985		0.0332676	0.056092	0.548923	Amino acid metabolism
Q3ZYI5	cbdbA1212	Glutamate 5-kinase OS=Dehalococcoides mccartyi (strain CBDB1) GN=proB PE=3 SV=1	Id.	1.67532	1.682	Id.		0.203659	0.267728		Amino acid metabolism; Biosynthesis of other secondary metabolites
Q3ZW18	cbdbA1610	Uncharacterized protein OS=Dehalococcoides mccartyi (strain CBDB1) GN=cbdbA1610 PE=4 SV=1	2.58648	2.88042	2.65383	2.76792	0.193369	0.0903186	0.589855	0.119585
Q3ZX40	cbdbA660	Formate--tetrahydrofolate ligase OS=Dehalococcoides mccartyi (strain CBDB1) GN=fhs PE=3 SV=1	n.d.	1.49183	1.36404	Id.		0.028553	0.189886		Energy metabolism; Metabolism of cofactors and vitamins
Q3ZYI9	cbdbA1206	N utilization substance protein B homolog OS=Dehalococcoides mccartyi (strain CBDB1) GN=nusB PE=3 SV=1	1.99794	1.69279	1.69763	2.0842	0.0191348	0.233897	0.114586	0.144092	Transcription; Translation
Q3ZXW2	cbdbA922	Single-stranded-DNA-specific exonuclease RecJ OS=Dehalococcoides mccartyi (strain CBDB1) GN=recJ PE=4 SV=1	Id.	1.73935	1.26135	Id.		0.075492	0.525762		Replication and repair
Q3ZYN3	cbdbA1272	50S ribosomal protein L31 OS=Dehalococcoides mccartyi (strain CBDB1) GN=rpmE PE=3 SV=1	2.34799	2.32567	2.46352	2.15256	0.251146	0.129614	0.112324	0.456124	Translation
Q3ZX47	cbdbA649	Uncharacterized protein OS=Dehalococcoides mccartyi (strain CBDB1) GN=cbdbA649 PE=4 SV=1	1.57466	1.57029	1.44689	1.5317	0.37328	0.39387	0.56013	0.244885
Q3ZY42	cbdbA1042	Sensor histidine kinase OS=Dehalococcoides mccartyi (strain CBDB1) GN=cbdbA1042 PE=4 SV=1	Id.	0.992055	1.25727	0.990933		0.305949	0.0229217	0.332402
Q3ZWD6	cbdbA45	PyrK family protein OS=Dehalococcoides mccartyi (strain CBDB1) GN=cbdbA45 PE=4 SV=1	1.36691	1.50283	1.23666	1.70914	0.109333	0.125701	0.601168	0.150949	Metabolism
Q3ZZQ2	cbdbA460	Methionine aminopeptidase OS=Dehalococcoides mccartyi (strain CBDB1) GN=map PE=3 SV=1	1.29753	1.67366	1.82281	1.3621	0.107287	0.221734	0.0908569	0.404828	Enzyme families
Q3ZWJ9	cbdbA149	Cobyrinate a,c-diamide synthase OS=Dehalococcoides mccartyi (strain CBDB1) GN=cbiA PE=3 SV=1	1.97774	1.93456	1.99817	1.7921	0.162447	0.154779	0.0617224	0.399159	Metabolism of cofactors and vitamins
Q3ZZU7	cbdbA528	Putative deoxyguanosinetriphosphate triphosphohydrolase OS=Dehalococcoides mccartyi (strain CBDB1) GN=cbdbA528 PE=4 SV=1	1.6567	1.52826	1.76065	1.13824	0.379561	0.255005	0.244328	0.390322	Nucleotide metabolism
Q3ZY45	cbdbA1039	ABC-type dipeptide/oligopeptide/nickel transport system, periplasmic component OS=Dehalococcoides mccartyi (strain CBDB1) GN=cbdbA1039 PE=4 SV=1	1.97675	n.d.	1.99701	1.73075	0.304384		0.208917	0.375513	Cellular community - prokaryotes; Drug resistance; Membrane transport
Q3ZYW1	cbdbA1402	Hydrogenase expression/formation protein HypE OS=Dehalococcoides mccartyi (strain CBDB1) GN=hypE PE=4 SV=1	n.d.	2.12334	2.13974	1.87604		0.0504945	0.0758292	0.196462	Genetic information processing
Q3ZW24	cbdbA1663	Mechanosensitive ion channel family protein OS=Dehalococcoides mccartyi (strain CBDB1) GN=cbdbA1663 PE=4 SV=1	1.39106	1.8011	1.9413	1.8192	0.374914	0.242633	0.166424	0.124118
Q3ZXT3	cbdbA907	Uncharacterized protein OS=Dehalococcoides mccartyi (strain CBDB1) GN=cbdbA907 PE=4 SV=1	1.80709	2.19718	2.39256	1.78578	0.143993	0.131588	0.0983803	0.304919	Poorly characterized
Q3ZX79	cbdbA669	PHP domain protein OS=Dehalococcoides mccartyi (strain CBDB1) GN=cbdbA669 PE=4 SV=1	1.84188	1.38515	1.54819	1.73758	0.173136	0.211442	0.25058	0.187512
Q3ZY99	cbdbA1138	Uncharacterized protein OS=Dehalococcoides mccartyi (strain CBDB1) GN=cbdbA1138 PE=4 SV=1	2.09991	2.29251	2.14069	1.9039	0.0278451	0.165386	0.0880819	0.234775
Q3ZYF2	cbdbA1194	ATP-dependent DNA helicase RecG OS=Dehalococcoides mccartyi (strain CBDB1) GN=recG PE=4 SV=1	Id.	0.873393	1.51914	Id.		0.440159	0.136892		Replication and repair
Q3ZWB8	cbdbA72	DNA repair protein radA OS=Dehalococcoides mccartyi (strain CBDB1) GN=radA PE=3 SV=1	n.d.	1.50396	1.76491	Id.		0.440601	0.0957914		Replication and repair
Q3ZX70	cbdbA680	Pyruvic-ferredoxin oxidoreductase, delta subunit OS=Dehalococcoides mccartyi (strain CBDB1) GN=porD PE=4 SV=1	2.306	2.39155	2.85807	1.32999	0.0948026	0.120183	0.123521	1.14177	Carbohydrate metabolism; Energy metabolism; Xenobiotics biodegradation and metabolism
Q3ZYC4	cbdbA1167	Uncharacterized protein OS=Dehalococcoides mccartyi (strain CBDB1) GN=cbdbA1167 PE=4 SV=1	1.37081	1.67248	2.01431	1.61687	0.287933	0.349663	0.201793	0.410076
Q3ZZK4	cbdbA400	Probable transcriptional regulatory protein cbdbA400 OS=Dehalococcoides mccartyi (strain CBDB1) GN=cbdbA400 PE=3 SV=1	n.d.	1.80553	1.75588	Id.		0.0599924	0.0998415
Q3ZWN4	cbdbA165	Phosphate import ATP-binding protein PstB OS=Dehalococcoides mccartyi (strain CBDB1) GN=pstB PE=3 SV=1	1.42788	1.60881	1.67224	1.32618	0.0819218	0.173126	0.322676	0.378694	Membrane transport
Q3ZZL5	cbdbA448	30S ribosomal protein S17 OS=Dehalococcoides mccartyi (strain CBDB1) GN=rpsQ PE=3 SV=1	1.58809	2.62202	2.70215	2.28243	0.118138	0.529744	0.062785	0.671212	Translation
Q3ZZU8	cbdbA527	DNA primase OS=Dehalococcoides mccartyi (strain CBDB1) GN=dnaG PE=3 SV=1	1.39353	1.73943	1.58529	Id.	0.00140574	0.0657734	0.263455		Replication and repair
Q3ZYI6	cbdbA1211	Transcription-repair-coupling factor OS=Dehalococcoides mccartyi (strain CBDB1) GN=mfd PE=3 SV=1	1.12841	1.43387	1.26685	1.28892	0.220132	0.0404623	0.313164	0.246973	Replication and repair
Q3ZWQ2	cbdbA200	Pyrroline-5-carboxylate reductase OS=Dehalococcoides mccartyi (strain CBDB1) GN=proC PE=3 SV=1	1.48963	1.94257	2.11169	Id.	0.094433	0.508056	0.104042		Amino acid metabolism
Q3ZYA1	cbdbA1136	HAD-superfamily hydrolase, subfamily IIB OS=Dehalococcoides mccartyi (strain CBDB1) GN=cbdbA1136 PE=4 SV=1	1.4151	1.42363	1.61275	0.902337	0.00775065	0.0422983	0.32795	0.064862
Q3ZZJ3	cbdbA415	HIT domain protein OS=Dehalococcoides mccartyi (strain CBDB1) GN=cbdbA415 PE=4 SV=1	2.06862	1.99467	2.04463	1.84344	0.234561	0.069784	0.210527	0.335936	Transport and catabolism
Q3ZWI5	cbdbA103	Uncharacterized protein OS=Dehalococcoides mccartyi (strain CBDB1) GN=cbdbA103 PE=4 SV=1	1.33505	1.14337	1.49557	1.53687	0.327075	0.283783	0.273623	0.14626
Q3ZX60	cbdbA633	ABC-type cobalamin/Fe3+-siderophores transport system, periplasmic component OS=Dehalococcoides mccartyi (strain CBDB1) GN=fecB PE=4 SV=1	2.02702	2.19665	2.24047	2.15519	0.157402	0.453154	0.137842	0.315441	Membrane transport
Q3ZXZ6	cbdbA985	ACT domain protein OS=Dehalococcoides mccartyi (strain CBDB1) GN=cbdbA985 PE=4 SV=1	2.47747	2.53713	2.51861	2.40747	0.0250466	0.125749	0.14944	0.176806
Q3ZWM5	cbdbA176	Uncharacterized protein OS=Dehalococcoides mccartyi (strain CBDB1) GN=cbdbA176 PE=4 SV=1	2.52547	2.40616	2.51775	2.37476	0.0899558	0.0959331	0.102897	0.20036
Q3ZXL0	cbdbA834	ABC transproter, ATP-binding protein OS=Dehalococcoides mccartyi (strain CBDB1) GN=cbdbA834 PE=4 SV=1	1.41541	1.87125	1.72373	1.39225	0.0310556	0.261133	0.284086	0.291222	Membrane transport
Q3ZX32	cbdbA616	D-ala D-alanine ligase OS=Dehalococcoides mccartyi (strain CBDB1) GN=ddl PE=4 SV=1	n.d.	2.02217	1.93942	Id.		0.132506	0.29455		Drug resistance; Glycan biosynthesis and metabolism; Metabolism of other amino acids
Q3ZZR3	cbdbA510	Uncharacterized protein OS=Dehalococcoides mccartyi (strain CBDB1) GN=cbdbA510 PE=4 SV=1	n.d.	2.09234	1.73289	Id.		0.185785	0.272823
Q3ZYQ6	cbdbA1303	Pilin biogenesis protein OS=Dehalococcoides mccartyi (strain CBDB1) GN=pilC PE=3 SV=1	1.60662	1.9214	1.35746	1.74251	0.578299	0.0311056	0.169471	0.0649124	Cell motility; Membrane transport
Q3ZX78	cbdbA670	Elongation factor P OS=Dehalococcoides mccartyi (strain CBDB1) GN=efp PE=3 SV=1	Id.	1.56115	1.28872	1.12057		0.268218	0.327201	0.0304069	Translation
Q3ZXT2	cbdbA908	Copper-translocating P-type ATPase OS=Dehalococcoides mccartyi (strain CBDB1) GN=cbdbA908 PE=3 SV=1	Id.	1.23393	1.33857	1.07955		0.206432	0.203363	0.0869257	Drug resistance; Signal transduction
Q3ZXZ4	cbdbA989	Sensor histidine kinase/response regulator OS=Dehalococcoides mccartyi (strain CBDB1) GN=cbdbA989 PE=4 SV=1	Id.	1.29112	1.14385	1.18146		0.413576	0.30587	0.125896
Q3ZZI0	cbdbA371	Amino acid ABC transporter, periplasmic aminoacid-binding protein OS=Dehalococcoides mccartyi (strain CBDB1) GN=cbdbA371 PE=4 SV=1	1.95714	2.27129	2.65269	2.29128	0.313603	0.71621	0.174797	0.292631	Membrane transport
Q3ZZL6	cbdbA447	50S ribosomal protein L29 OS=Dehalococcoides mccartyi (strain CBDB1) GN=rpmC PE=3 SV=1	Id.	2.43312	2.34502	Id.		0.115977	0.224314		Translation
Q3ZWI7	cbdbA101	Uncharacterized protein OS=Dehalococcoides mccartyi (strain CBDB1) GN=cbdbA101 PE=4 SV=1	n.d.	1.36012	1.40255	Id.		0.226817	0.617725
Q3ZWZ9	cbdbA588	Holliday junction ATP-dependent DNA helicase RuvB OS=Dehalococcoides mccartyi (strain CBDB1) GN=ruvB PE=3 SV=1	1.19361	1.22878	1.37053	Id.	0.00812833	0.138231	0.266438		Replication and repair
Q3ZWC7	cbdbA59	Uncharacterized protein OS=Dehalococcoides mccartyi (strain CBDB1) GN=cbdbA59 PE=4 SV=1	Id.	1.83489	1.45769	1.50331		0.0227149	0.862558	0.0169735
Q3ZYG5	cbdbA1178	Twitching mobility protein OS=Dehalococcoides mccartyi (strain CBDB1) GN=pilT PE=4 SV=1	1.9734	1.37155	1.29487	1.55374	0.187081	0.577374	0.425751	0.345657	Cell motility; Membrane transport
Q3ZYB1	cbdbA1125	Nucleotidyl transferase family protein OS=Dehalococcoides mccartyi (strain CBDB1) GN=cbdbA1125 PE=4 SV=1	1.42138	1.73392	1.73173	1.68424	0.045062	0.308322	0.122732	0.229951
Q3ZY94	cbdbA1092	Putative reductive dehalogenase OS=Dehalococcoides mccartyi (strain CBDB1) GN=rdhA PE=4 SV=1	Id.	Id.	Id.	n.d.
Q3ZVT2	cbdbA1543	Sensor histidine kinase OS=Dehalococcoides mccartyi (strain CBDB1) GN=rdhC PE=4 SV=1	n.d.	1.63852	1.36018	0.955841		0.159971	0.184978	0.398993
Q3ZW45	cbdbA1638	Putative reductive dehalogenase OS=Dehalococcoides mccartyi (strain CBDB1) GN=rdhA PE=4 SV=1	Id.	Id.	1.28559	Id.			0.687707
Q3ZWN9	cbdbA159	Sensor histidine kinase OS=Dehalococcoides mccartyi (strain CBDB1) GN=cbdbA159 PE=4 SV=1	1.23505	1.4938	1.51986	Id.	0.124978	0.293759	0.242066		Enzyme families; Signal transduction
Q3ZYY9	cbdbA1422	Uncharacterized protein OS=Dehalococcoides mccartyi (strain CBDB1) GN=cbdbA1422 PE=4 SV=1	2.34553	2.28893	2.32149	2.49898	0.271129	0.0801033	0.0578285	0.170954
Q3ZZK9	cbdbA428	Shikimate kinase OS=Dehalococcoides mccartyi (strain CBDB1) GN=aroK PE=3 SV=1	Id.	1.88748	1.3486	Id.		0.435512	0.79827		Amino acid metabolism
Q3ZWX2	cbdbA562	Nucleoid-associated protein cbdbA562 OS=Dehalococcoides mccartyi (strain CBDB1) GN=cbdbA562 PE=3 SV=1	Id.	2.22208	2.60257	2.04796		0.834681	0.0696577	0.793267	Poorly characterized
Q3ZZ03	cbdbA1458	Peptide ABC transporter, ATP-binding protein OS=Dehalococcoides mccartyi (strain CBDB1) GN=cbdbA1458 PE=3 SV=1	2.02264	1.70341	1.27977	1.79199	0.0529268	0.565325	0.123066	0.811546
Q3ZXT0	cbdbA911	Bacterioferritin domain protein OS=Dehalococcoides mccartyi (strain CBDB1) GN=cbdbA911 PE=4 SV=1	1.47951	1.43786	1.66173	1.63606	0.164299	0.487884	0.225727	0.109702	Metabolism of cofactors and vitamins
Q3ZZX7	cbdbA1720	Putative desulforedoxin OS=Dehalococcoides mccartyi (strain CBDB1) GN=cbdbA1720 PE=4 SV=1	1.57427	2.20823	2.83416	2.32784	0.383639	0.561835	0.147618	0.763194
Q3ZYZ3	cbdbA1418	Uncharacterized protein OS=Dehalococcoides mccartyi (strain CBDB1) GN=cbdbA1418 PE=4 SV=1	1.93064	1.74235	1.69057	Id.	0.593968	0.221424	0.166321
Q3ZWM6	cbdbA175	Probable lysophospholipase OS=Dehalococcoides mccartyi (strain CBDB1) GN=cbdbA175 PE=4 SV=1	n.d.	1.63774	1.61998	1.44964		0.366859	0.348276	0.0195276
Q3ZWX4	cbdbA560	Magnesium and cobalt transport protein CorA OS=Dehalococcoides mccartyi (strain CBDB1) GN=corA PE=4 SV=1	2.4857	1.86746	1.75898	Id.	0.0583617	0.606034	0.290349		Membrane transport
Q3ZY52	cbdbA1086	ABC transporter, ATP-binding/permease protein OS=Dehalococcoides mccartyi (strain CBDB1) GN=cbdbA1086 PE=3 SV=1	n.d.	1.08637	1.21394	Id.		0.166479	0.086808		Membrane transport
Q3ZWQ4	cbdbA198	Ferredoxin, iron-sulfur cluster-binding protein OS=Dehalococcoides mccartyi (strain CBDB1) GN=fdx1 PE=4 SV=1	n.d.	2.05295	2.10661	Id.		0.268464	0.278368
Q3ZYX0	cbdbA1390	tRNA N6-adenosine threonylcarbamoyltransferase OS=Dehalococcoides mccartyi (strain CBDB1) GN=tsaD PE=3 SV=1	Id.	1.68484	1.80916	1.55257		0.162345	0.0940267	0.447188	Translation
Q3ZZI2	cbdbA369	Amino acid ABC transporter, ATP-binding protein OS=Dehalococcoides mccartyi (strain CBDB1) GN=cbdbA369 PE=3 SV=1	1.64952	1.47487	1.60504	1.60733	0.185636	0.188846	0.153855	0.118355
Q3ZYN7	cbdbA1268	Dephospho-CoA kinase OS=Dehalococcoides mccartyi (strain CBDB1) GN=coaE PE=3 SV=1	Id.	1.4593	1.30639	1.58134		0.11231	0.267591	0.122678	Metabolism of cofactors and vitamins
Q3ZYM6	cbdbA1282	Aspartyl/glutamyl-tRNA(Asn/Gln) amidotransferase subunit C OS=Dehalococcoides mccartyi (strain CBDB1) GN=gatC PE=3 SV=1	Id.	2.09068	1.92685	1.44694		0.297981	0.0451381	0.649979	Translation
Q3ZX14	cbdbA628	Putative ribose-5-phosphate isomerase OS=Dehalococcoides mccartyi (strain CBDB1) GN=rpiB PE=4 SV=1	1.67377	1.94551	1.71017	Id.	0.325975	0.659607	0.42715		Carbohydrate metabolism; Energy metabolism
Q3ZYW7	cbdbA1394	Peptidase, M16 family OS=Dehalococcoides mccartyi (strain CBDB1) GN=cbdbA1394 PE=3 SV=1	n.d.	1.75053	1.61867	Id.		0.0164041	0.113328
Q3ZW96	cbdbA33	Putative potassium uptake protein OS=Dehalococcoides mccartyi (strain CBDB1) GN=cbdbA33 PE=4 SV=1	n.d.	1.67739	1.78847	Id.		0.122419	0.0271703		Membrane transport
Q3ZWQ5	cbdbA197	Phosphopantetheine adenylyltransferase OS=Dehalococcoides mccartyi (strain CBDB1) GN=coaD PE=3 SV=1	Id.	1.54593	1.5198	1.74991		0.0978336	0.254318	0.333236	Metabolism of cofactors and vitamins
Q3ZXU8	cbdbA942	Glycosyl transferase, group 1 family protein OS=Dehalococcoides mccartyi (strain CBDB1) GN=cbdbA942 PE=4 SV=1	1.47669	1.3712	1.63736	Id.	0.1924	0.286002	0.274161		Glycan biosynthesis and metabolism
Q3ZW74	cbdbA1710	Transcriptional regulator, AbrB family OS=Dehalococcoides mccartyi (strain CBDB1) GN=cbdbA1710 PE=4 SV=1	n.d.	1.77009	1.86694	1.44099		0.179739	0.187769	0.203165
Q3ZZS5	cbdbA492	PBS lyase HEAT-like repeat domain protein OS=Dehalococcoides mccartyi (strain CBDB1) GN=cbdbA492 PE=4 SV=1	1.82184	1.95332	1.08451	Id.	0.0678182	0.0944289	0.200062
Q3ZXD4	cbdbA758	Thiamine-phosphate synthase OS=Dehalococcoides mccartyi (strain CBDB1) GN=thiE PE=3 SV=1	1.87446	1.77654	1.47573	1.81025	0.149388	0.433231	0.250769	0.219366	Metabolism of cofactors and vitamins
Q3ZY95	cbdbA1091	Transcriptional regulator, MarR family OS=Dehalococcoides mccartyi (strain CBDB1) GN=rdhR PE=4 SV=1	1.53822	1.81221	2.03072	1.86634	0.54813	0.236985	0.230313	0.150805
Q3ZWZ6	cbdbA592	Uncharacterized protein OS=Dehalococcoides mccartyi (strain CBDB1) GN=cbdbA592 PE=4 SV=1	n.d.	2.36235	2.35685	Id.		0.0238874	0.0449927
Q3ZZC7	cbdbA314	1-deoxy-D-xylulose 5-phosphate reductoisomerase OS=Dehalococcoides mccartyi (strain CBDB1) GN=dxr PE=3 SV=1	1.59313	1.44059	1.17434	1.71156	0.159764	0.0753415	0.305778	0.129567	Metabolism of terpenoids and polyketides
Q3ZYM4	cbdbA1285	Uncharacterized protein OS=Dehalococcoides mccartyi (strain CBDB1) GN=cbdbA1285 PE=4 SV=1	2.06777	1.95075	2.08694	1.68613	0.196395	0.491339	0.281996	0.288545
Q3ZWG7	cbdbA126	LemA family domain protein OS=Dehalococcoides mccartyi (strain CBDB1) GN=cbdbA126 PE=4 SV=1	n.d.	1.51674	1.4162	1.24934		0.128982	0.215877	0.335132
Q3ZYL6	cbdbA1294	4-hydroxy-3-methylbut-2-enyl diphosphate reductase OS=Dehalococcoides mccartyi (strain CBDB1) GN=ispH PE=3 SV=1	1.47763	1.15928	1.39364	1.46915	0.335621	0.502659	0.0570257	0.152236	Metabolism of terpenoids and polyketides
Q3ZXL2	cbdbA832	Biotin-acetyl-CoA-carboxylase ligase OS=Dehalococcoides mccartyi (strain CBDB1) GN=birA PE=4 SV=1	1.23483	1.19626	1.70256	1.49355	0.567191	0.243624	0.178311	0.0494606	Metabolism of cofactors and vitamins; Transcription
Q3ZWR1	cbdbA189	ATP-dependent RNA helicase, DEAD OS=Dehalococcoides mccartyi (strain CBDB1) GN=cbdbA189 PE=3 SV=1	n.d.	1.75767	n.d.	n.d.		0.154232			Folding, sorting and degradation; Translation
Q3ZYN4	cbdbA1271	50S ribosomal protein L27 OS=Dehalococcoides mccartyi (strain CBDB1) GN=rpmA PE=3 SV=1	2.09883	2.62434	2.97742	2.08595	0.246178	0.60999	0.147959	0.690191	Translation
Q3ZWN7	cbdbA161	Phosphate ABC transporter, phosphate-binding protein OS=Dehalococcoides mccartyi (strain CBDB1) GN=pstS PE=4 SV=1	1.7181	1.85533	1.80261	1.98585	0.00530909	0.191496	0.377789	0.0399999	Membrane transport; Signal transduction
Q3ZZA1	cbdbA286	Transcriptional repressor NrdR OS=Dehalococcoides mccartyi (strain CBDB1) GN=nrdR PE=3 SV=1	Id.	1.13623	1.41827	Id.		0.31136	0.112262		Transcription
Q3ZWP0	cbdbA158	DNA-binding response regulator OS=Dehalococcoides mccartyi (strain CBDB1) GN=cbdbA158 PE=4 SV=1	n.d.	1.19954	1.35505	Id.		0.0666349	0.0975114
Q3ZYG8	cbdbA1203	50S ribosomal protein L32 OS=Dehalococcoides mccartyi (strain CBDB1) GN=rpmF PE=3 SV=1	2.37708	2.98317	2.88638	2.54243	0.179623	0.437352	0.169448	0.379565	Translation
Q3ZWH8	cbdbA109	Uncharacterized protein OS=Dehalococcoides mccartyi (strain CBDB1) GN=cbdbA109 PE=4 SV=1	n.d.	1.15731	1.10847	Id.		0.248788	0.0486388
Q3ZXM2	cbdbA820	N5-carboxyaminoimidazole ribonucleotide mutase OS=Dehalococcoides mccartyi (strain CBDB1) GN=purE PE=3 SV=1	1.59828	1.96888	1.8839	Id.	0.0788472	0.171721	0.192422		Nucleotide metabolism
Q3ZZP0	cbdbA472	SIS domain protein OS=Dehalococcoides mccartyi (strain CBDB1) GN=cbdbA472 PE=4 SV=1	1.46547	1.67542	1.25292	1.73128	0.106618	0.163796	0.317598	0.179034	Carbohydrate metabolism
Q3ZZS0	cbdbA499	Glucose-1-phosphate thymidylyltransferase OS=Dehalococcoides mccartyi (strain CBDB1) GN=rfbA PE=4 SV=1	Id.	1.68195	1.63428	Id.		0.0510034	0.133206		Carbohydrate metabolism
Q3ZW36	cbdbA1648	Conserved domain protein OS=Dehalococcoides mccartyi (strain CBDB1) GN=cbdbA1648 PE=4 SV=1	n.d.	1.85741	1.34486	Id.		0.56825	0.312019
Q3ZYT3	cbdbA1324	Dihydroorotate dehydrogenase OS=Dehalococcoides mccartyi (strain CBDB1) GN=pyrD PE=3 SV=1	1.28955	2.00711	1.94422	1.51113	0.314454	0.234094	0.321109	0.450876	Nucleotide metabolism
Q3ZXT6	cbdbA904	CBS domain protein OS=Dehalococcoides mccartyi (strain CBDB1) GN=cbdbA904 PE=4 SV=1	1.82696	2.1962	2.49669	2.01871	0.19296	0.338981	0.0703079	0.647411
Q3ZY10	cbdbA1023	Putative translation initiation inhibitor OS=Dehalococcoides mccartyi (strain CBDB1) GN=cbdbA1023 PE=4 SV=1	2.02424	2.00283	2.12702	2.4691	0.420789	0.658332	0.146443	0.249813	Metabolism
Q3ZW14	cbdbA1614	Putative integral membrane efflux protein OS=Dehalococcoides mccartyi (strain CBDB1) GN=cbdbA1614 PE=4 SV=1	n.d.	1.72289	1.23935	Id.		0.156945	0.288025		Cellular processes and signaling
Q3ZZA4	cbdbA281	Ribosomal RNA small subunit methyltransferase H OS=Dehalococcoides mccartyi (strain CBDB1) GN=rsmH PE=3 SV=1	1.63084	1.56773	1.9098	1.73503	0.167586	0.373018	0.234104	0.354975	Translation
Q3ZY50	cbdbA1060	Imidazole glycerol phosphate synthase subunit HisH OS=Dehalococcoides mccartyi (strain CBDB1) GN=hisH PE=3 SV=1	1.01384	1.78543	1.99472	1.43508	0.0257247	0.41554	0.140918	0.367319	Amino acid metabolism
Q3ZWF8	cbdbA81	Uncharacterized protein OS=Dehalococcoides mccartyi (strain CBDB1) GN=rdhF PE=4 SV=1	n.d.	2.2361	1.01168	Id.		0.00528354	0.409428
Q3ZVU5	cbdbA1532	Putative transcriptional regulator OS=Dehalococcoides mccartyi (strain CBDB1) GN=cbdbA1532 PE=4 SV=1	n.d.	1.37292	1.57842	1.46408		0.243102	0.241477	0.228857
Q3ZVU9	cbdbA1576	Transcriptional regulator, MarR family OS=Dehalococcoides mccartyi (strain CBDB1) GN=rdhR PE=4 SV=1	Id.	1.88705	1.76343	Id.		0.355132	0.458093
Q3ZXB1	cbdbA730	Uncharacterized protein OS=Dehalococcoides mccartyi (strain CBDB1) GN=cbdbA730 PE=3 SV=1	1.49253	1.65537	1.94937	1.74354	0.650985	0.563741	0.322068	0.287279	Metabolism
Q3ZWZ3	cbdbA595	Histone acetyltransferase, ELP3 family OS=Dehalococcoides mccartyi (strain CBDB1) GN=cbdbA595 PE=4 SV=1	Id.	1.04691	1.06863	0.959236		0.158561	0.0607988	0.378381	Replication and repair; Translation
Q3ZYK2	cbdbA1254	Radical SAM domain protein OS=Dehalococcoides mccartyi (strain CBDB1) GN=cbdbA1254 PE=4 SV=1	0.870265	1.55438	1.68755	2.04293	0.0230805	0.0133289	0.182789	0.582053	Genetic information processing
Q3ZX49	cbdbA646	Sensor histidine kinase OS=Dehalococcoides mccartyi (strain CBDB1) GN=cbdbA646 PE=4 SV=1	n.d.	1.71532	1.71052	Id.		0.0267713	0.0220995
Q3ZYT6	cbdbA1377	Amidophosphoribosyltransferase OS=Dehalococcoides mccartyi (strain CBDB1) GN=purF PE=3 SV=1	n.d.	1.39278	1.63107	Id.		0.434733	0.229076		Amino acid metabolism; Enzyme families; Nucleotide metabolism
Q3ZYH0	cbdbB26	Uncharacterized protein OS=Dehalococcoides mccartyi (strain CBDB1) GN=cbdbA1236 PE=4 SV=1	2.85689	3.5212	3.36845	2.62023	0.485356	0.218808	0.127073	0.377901
Q3ZZF1	cbdbA350	Putative ubiquinone/menaquinone biosynthesis methlytransferase UbiE OS=Dehalococcoides mccartyi (strain CBDB1) GN=cbdbA350 PE=4 SV=1	Id.	1.81165	1.14468	1.14328		0.135885	0.349927	0.321382	Metabolism of cofactors and vitamins
Q3ZZF4	cbdbA346	Uncharacterized protein OS=Dehalococcoides mccartyi (strain CBDB1) GN=cbdbA346 PE=4 SV=1	2.06957	1.50518	1.67821	1.90892	0.122786	0.324823	0.556023	0.0947091	Translation
Q3ZWQ9	cbdbA191	Formate dehydrogenase accessory protein OS=Dehalococcoides mccartyi (strain CBDB1) GN=fdhE PE=4 SV=1	Id.	1.50248	0.993623	1.30152		0.333373	0.0399871	0.173566	Genetic information processing
Q3ZY70	cbdbA1064	Uncharacterized protein OS=Dehalococcoides mccartyi (strain CBDB1) GN=cbdbA1064 PE=4 SV=1	2.15377	1.31284	1.19019	Id.	0.518969	0.620927	0.289374
Q3ZYR1	cbdbA1298	RNA polymerase sigma-70 factor, ECF subfamily OS=Dehalococcoides mccartyi (strain CBDB1) GN=cbdbA1298 PE=4 SV=1	Id.	1.55739	1.7853	Id.		0.0935265	0.146593		Transcription
Q3ZYJ6	cbdbA1260	Uncharacterized protein OS=Dehalococcoides mccartyi (strain CBDB1) GN=cbdbA1260 PE=4 SV=1	Id.	1.29771	1.20089	Id.		0.162752	0.0533406
Q3ZXS5	cbdbA918	Uncharacterized protein OS=Dehalococcoides mccartyi (strain CBDB1) GN=cbdbA918 PE=4 SV=1	Id.	1.26844	1.82316	Id.		0.196851	0.117687		Transcription
Q3ZZA9	cbdbA276	Putative DNA-binding protein OS=Dehalococcoides mccartyi (strain CBDB1) GN=cbdbA276 PE=4 SV=1	2.4379	2.3777	2.615	2.30367	0.440831	0.233409	0.147828	0.190051
Q3ZZE0	cbdbA362	ABC transporter, ATP-binding protein OS=Dehalococcoides mccartyi (strain CBDB1) GN=nodI PE=3 SV=1	n.d.	1.42991	1.54983	Id.		0.315342	0.236035		Membrane transport
Q3ZY61	cbdbA1075	DNA-binding response regulator, LuxR family OS=Dehalococcoides mccartyi (strain CBDB1) GN=cbdbA1075 PE=4 SV=1	n.d.	1.37657	1.71313	Id.		0.290521	0.178618
Q3ZYJ0	cbdbA1205	3-oxoacyl-acyl carrier protein reductase OS=Dehalococcoides mccartyi (strain CBDB1) GN=fabG PE=3 SV=1	1.52115	2.05795	1.62125	1.73798	0.298979	0.0825628	0.0829386	0.00238718	Biosynthesis of other secondary metabolites; Lipid metabolism; Metabolism of cofactors and vitamins
Q3ZX26	cbdbA618	Cation ABC transporter, periplasmc-binding protein OS=Dehalococcoides mccartyi (strain CBDB1) GN=cbdbA618 PE=3 SV=1	Id.	1.53313	1.7002	1.56953		0.425198	0.492362	0.675537	Membrane transport
Q3ZX35	cbdbA615	Lysine 2,3-aminomutase OS=Dehalococcoides mccartyi (strain CBDB1) GN=kamA PE=4 SV=1	n.d.	1.94249	1.1587	Id.		0.0104902	0.294262		Amino acid metabolism
Q3ZZ38	cbdbA1470	Uncharacterized protein OS=Dehalococcoides mccartyi (strain CBDB1) GN=cbdbA1470 PE=4 SV=1	Id.	1.35015	1.47199	1.79187		0.626237	0.0565979	0.213673	Transcription
Q3ZZA5	cbdbA280	Protein MraZ OS=Dehalococcoides mccartyi (strain CBDB1) GN=mraZ PE=3 SV=1	1.91702	1.80088	1.79223	1.88285	0.252821	0.273611	0.161069	0.570513	Poorly characterized
Q3ZXQ9	cbdbA889	Endonuclease III OS=Dehalococcoides mccartyi (strain CBDB1) GN=nth PE=3 SV=1	1.43998	1.53109	1.55964	Id.	0.098625	0.215724	0.395321		Replication and repair
Q3ZW97	cbdbA32	Putative potassium uptake protein, TrkA homolog OS=Dehalococcoides mccartyi (strain CBDB1) GN=cbdbA32 PE=4 SV=1	1.927	2.02029	1.94674	1.7678	0.157733	0.170632	0.116525	0.0959866	Membrane transport
Q3ZXM5	cbdbA871	Iron-sulfur cluster-binding protein OS=Dehalococcoides mccartyi (strain CBDB1) GN=cbdbA871 PE=4 SV=1	2.09113	1.7351	1.14353	1.78381	0.402601	0.498396	0.561274	0.140137
Q3ZX17	cbdbA625	Universal stress protein family OS=Dehalococcoides mccartyi (strain CBDB1) GN=cbdbA625 PE=4 SV=1	1.60631	1.91729	2.09736	1.70875	0.342591	0.13106	0.0508152	0.138109
Q3ZX82	cbdbA666	ATP-dependent Clp protease proteolytic subunit OS=Dehalococcoides mccartyi (strain CBDB1) GN=clpP PE=3 SV=1	2.24817	1.66438	1.26946	1.86779	0.111389	0.397122	0.683418	0.549458	Cell growth and death; Enzyme families
Q3ZW53	cbdbA1688	Putative membrane bound regulatory protein,CprC OS=Dehalococcoides mccartyi (strain CBDB1) GN=cbdbA1688 PE=4 SV=1	2.81817	2.70101	2.35479	2.56569	0.0934133	0.297781	0.250523	0.429621
Q3ZVT1	cbdbA1544	DNA-binding response regulator OS=Dehalococcoides mccartyi (strain CBDB1) GN=rdhD PE=4 SV=1	Id.	1.71645	1.59688	1.67453		0.276199	0.317706	0.120894	Cellular community - prokaryotes; Signal transduction
Q3ZY43	cbdbA1041	DNA-binding response regulator, LuxR family OS=Dehalococcoides mccartyi (strain CBDB1) GN=cbdbA1041 PE=4 SV=1	1.10921	1.50344	1.74985	1.59143	0.259964	0.355014	0.226539	0.105462
Q3ZZM0	cbdbA443	30S ribosomal protein S19 OS=Dehalococcoides mccartyi (strain CBDB1) GN=rpsS PE=3 SV=1	2.16009	2.90437	2.94398	2.80823	0.954986	0.166383	0.079398	0.414128	Translation
Q3ZWW5	cbdbA541	UPF0109 protein cbdbA541 OS=Dehalococcoides mccartyi (strain CBDB1) GN=cbdbA541 PE=3 SV=1	2.18779	2.98152	2.91862	1.88458	0.275108	0.425324	0.0610311	1.02033	Poorly characterized
Q3ZWA5	cbdbA20	Uncharacterized protein OS=Dehalococcoides mccartyi (strain CBDB1) GN=cbdbA20 PE=4 SV=1	2.38863	2.29403	2.51743	2.35196	0.0620917	0.214767	0.0610415	0.127238
Q3ZZ34	cbdbA1475	Ferrous iron transport protein B OS=Dehalococcoides mccartyi (strain CBDB1) GN=feoB PE=4 SV=1	1.33534	1.27822	1.12649	1.67264	0.503206	0.395948	0.329903	0.578887	Membrane transport
Q3ZYL4	cbdbA1239	Universal stress protein family OS=Dehalococcoides mccartyi (strain CBDB1) GN=cbdbA1239 PE=4 SV=1	2.36885	2.16703	2.30155	2.10306	0.309998	0.165683	0.0470147	0.481762
Q3ZYL1	cbdbA1244	Uncharacterized protein OS=Dehalococcoides mccartyi (strain CBDB1) GN=cbdbA1244 PE=4 SV=1	n.d.	1.63071	1.53547	0.74986		0.628262	0.237727	0.114505
Q3ZW89	cbdbA2	GTPase Obg OS=Dehalococcoides mccartyi (strain CBDB1) GN=obg PE=3 SV=1	1.67437	1.60659	1.21521	1.68103	0.0984394	0.272429	0.310089	0.048433	Translation
Q3ZZ41	cbdbA1466	Transcriptional regulator, MarR family OS=Dehalococcoides mccartyi (strain CBDB1) GN=cbdbA1466 PE=4 SV=1	1.80342	1.97328	2.02589	1.53076	0.138874	0.24843	0.147954	0.418525
Q3ZW64	cbdbA1673	Uncharacterized protein OS=Dehalococcoides mccartyi (strain CBDB1) GN=cbdbA1673 PE=4 SV=1	1.76417	1.42871	1.37552	Id.	0.00237577	0.344918	0.175967		Poorly characterized
Q3ZYE6	cbdbA1202	Uncharacterized protein OS=Dehalococcoides mccartyi (strain CBDB1) GN=cbdbA1202 PE=4 SV=1	1.70521	1.75594	1.66881	1.69902	0.168393	0.261639	0.115566	0.440239	Poorly characterized
Q3ZZC3	cbdbA319	Uridylate kinase OS=Dehalococcoides mccartyi (strain CBDB1) GN=pyrH PE=3 SV=1	1.07954	1.58311	1.69771	Id.	0.346923	0.128755	0.137717		Nucleotide metabolism
Q3ZZM2	cbdbA441	50S ribosomal protein L23 OS=Dehalococcoides mccartyi (strain CBDB1) GN=rplW PE=3 SV=1	2.01616	2.6539	2.72326	2.33487	0.193696	0.40543	0.115896	0.39844	Translation
Q3ZZH6	cbdbA374	Putative magnesium and cobalt transport protein OS=Dehalococcoides mccartyi (strain CBDB1) GN=corA PE=4 SV=1	1.8822	1.61076	1.39962	1.62272	0.121214	0.146581	0.377041	0.226315	Membrane transport
Q3ZXR8	cbdbA877	NADH-quinone oxidoreductase subunit D OS=Dehalococcoides mccartyi (strain CBDB1) GN=nuoD PE=3 SV=1	Id.	1.44831	1.43938	Id.		0.112559	0.251575		Energy metabolism
Q3ZYH8	cbdbA1225	Ribonuclease PH OS=Dehalococcoides mccartyi (strain CBDB1) GN=rph PE=3 SV=1	1.30375	1.73684	1.65206	Id.	0.243815	0.0472938	0.353798		Translation
Q3ZX67	cbdbA683	Putative [Fe] hydrogenase, HymA subunit OS=Dehalococcoides mccartyi (strain CBDB1) GN=hymA PE=4 SV=1	1.43622	2.39905	1.81285	1.54005	0.311597	0.428489	0.986508	0.854279	Energy metabolism
Q3ZYF1	cbdbA1195	Deoxyguanosinetriphosphate triphosphohydrolase-like protein OS=Dehalococcoides mccartyi (strain CBDB1) GN=cbdbA1195 PE=3 SV=1	Id.	1.27608	1.30103	n.d.		0.0689869	0.536939		Nucleotide metabolism
Q3ZZL9	cbdbA444	50S ribosomal protein L22 OS=Dehalococcoides mccartyi (strain CBDB1) GN=rplV PE=3 SV=1	Id.	2.82858	2.60124	Id.		0.0878536	0.230754		Translation
Q3ZYU9	cbdbA1361	Heat-inducible transcription repressor HrcA OS=Dehalococcoides mccartyi (strain CBDB1) GN=hrcA PE=3 SV=1	n.d.	1.36477	1.30875	Id.		0.0752176	0.488146		Transcription
Q3ZW81	cbdbA1703	Uncharacterized protein OS=Dehalococcoides mccartyi (strain CBDB1) GN=cbdbA1703 PE=4 SV=1	Id.	1.56457	1.50512	1.67679		0.0985965	0.0577007	0.114367	Poorly characterized
Q3ZYF8	cbdbA1186	50S ribosomal protein L28 OS=Dehalococcoides mccartyi (strain CBDB1) GN=rpmB PE=3 SV=1	1.91101	2.54415	3.04805	2.20618	0.192096	0.467971	0.177321	0.483443	Translation
Q3ZZQ1	cbdbA461	Translation initiation factor IF-1 OS=Dehalococcoides mccartyi (strain CBDB1) GN=infA PE=3 SV=1	1.9753	1.69349	2.06607	2.06958	0.0479899	0.422105	0.0678831	0.0442101	Translation
Q3ZZV5	cbdbA519	Activator of 2-hydroxyglutaryl-CoA dehydratase OS=Dehalococcoides mccartyi (strain CBDB1) GN=cbdbA519 PE=4 SV=1	n.d.	1.71399	1.44688	1.32631		0.148333	0.366242	0.602779
Q3ZY87	cbdbA1099	Uncharacterized protein OS=Dehalococcoides mccartyi (strain CBDB1) GN=cbdbA1099 PE=4 SV=1	2.17959	2.09798	2.20402	2.36709	0.464209	0.333747	0.171684	0.317864
Q3ZYT0	cbdbA1328	Pseudouridine synthase OS=Dehalococcoides mccartyi (strain CBDB1) GN=cbdbA1328 PE=3 SV=1	1.75618	Id.	1.66061	1.69078	0.120532		0.0881265	0.409608	Translation
Q3ZX58	cbdbA636	ABC-type cobalamin/Fe3+-siderophores transport system, ATPase component OS=Dehalococcoides mccartyi (strain CBDB1) GN=fepC PE=4 SV=1	Id.	1.75206	1.2459	Id.		0.351079	0.0206274		Membrane transport
Q3ZW93	cbdbA37	Putative potassium uptake protein, TrkA homologe OS=Dehalococcoides mccartyi (strain CBDB1) GN=cbdbA37 PE=4 SV=1	Id.	1.77198	1.78887	1.84986		0.316167	0.0513482	0.423204	Membrane transport
Q3ZXT7	cbdbA903	Indolepyruvate ferredoxin oxidoreductase, beta subunit OS=Dehalococcoides mccartyi (strain CBDB1) GN=iorB PE=4 SV=1	Id.	1.57527	1.76634	Id.		0.482456	0.454029		Metabolism
Q3ZZ57	cbdbA1497	DNA-binding response regulator OS=Dehalococcoides mccartyi (strain CBDB1) GN=rdhD PE=4 SV=1	Id.	1.24442	1.79042	1.5328		0.224773	0.0297762	0.19605
Q3ZYR7	cbdbA1344	Formamidopyrimidine-DNA glycosylase OS=Dehalococcoides mccartyi (strain CBDB1) GN=mutM PE=4 SV=1	1.82904	1.6443	1.3861	1.63559	0.280873	0.527616	0.350633	0.912632	Replication and repair
Q3ZXM4	cbdbA845	Hydrogenase subunit HymA OS=Dehalococcoides mccartyi (strain CBDB1) GN=cbdbA845 PE=4 SV=1	Id.	2.19548	1.2843	1.85772		0.153113	0.852073	0.103502	Energy metabolism
Q3ZW66	cbdbA1670	Conserved domain protein OS=Dehalococcoides mccartyi (strain CBDB1) GN=cbdbA1670 PE=4 SV=1	n.d.	1.45784	1.45636	Id.		0.257049	0.271728
Q3ZZ33	cbdbA1477	Iron(II) transport protein A OS=Dehalococcoides mccartyi (strain CBDB1) GN=feoA PE=4 SV=1	Id.	1.59847	1.75145	1.2778		0.559759	0.117289	0.354437	Membrane transport
Q3ZX06	cbdbA579	Glutamine amidotransferase subunit PdxT OS=Dehalococcoides mccartyi (strain CBDB1) GN=pdxT PE=3 SV=1	Id.	1.46545	1.15342	1.42471		0.0100343	0.151603	0.340979	Metabolism of cofactors and vitamins
Q3ZW80	cbdbA1704	PHP domain N-terminal region family protein OS=Dehalococcoides mccartyi (strain CBDB1) GN=cbdbA1704 PE=4 SV=1	n.d.	1.53721	1.48558	1.3957		0.0966406	0.111568	0.0728735	Metabolism
Q3ZX57	cbdbA637	Uncharacterized protein OS=Dehalococcoides mccartyi (strain CBDB1) GN=rdhF PE=4 SV=1	Id.	1.53652	1.42271	1.50453		0.112947	0.166633	0.181316
Q3ZXY1	cbdbA953	Uncharacterized protein OS=Dehalococcoides mccartyi (strain CBDB1) GN=cbdbA953 PE=4 SV=1	2.17068	2.24595	2.11007	1.55906	0.515188	0.301599	0.149562	0.214231
Q3ZYD1	cbdbA1158	Formyltetrahydrofolate deformylase OS=Dehalococcoides mccartyi (strain CBDB1) GN=purU PE=4 SV=1	Id.	1.76707	1.64895	1.93239		0.180925	0.167739	0.0844357	Carbohydrate metabolism; Metabolism of cofactors and vitamins
Q3ZYL5	cbdbA1295	Putative tagatose 1,6-diphosphate aldolase OS=Dehalococcoides mccartyi (strain CBDB1) GN=cbdbA1295 PE=4 SV=1	1.58547	Id.	1.06779	1.36971	0.219847		0.262444	0.205361	Carbohydrate metabolism; Cellular community - prokaryotes
Q3ZYP0	cbdbA1320	Uncharacterized protein OS=Dehalococcoides mccartyi (strain CBDB1) GN=cbdbA1320 PE=4 SV=1	2.60906	2.69643	2.20682	2.55092	0.301365	0.243563	0.523395	0.0795008
Q3ZYN6	cbdbA1269	Uncharacterized protein OS=Dehalococcoides mccartyi (strain CBDB1) GN=cbdbA1269 PE=4 SV=1	1.51898	1.38894	1.51551	1.30773	0.12525	0.0919844	0.196291	0.0742487	Energy metabolism; Energy metabolism
Q3ZY25	cbdbA1004	DegV family protein OS=Dehalococcoides mccartyi (strain CBDB1) GN=cbdbA1004 PE=4 SV=1	1.47596	1.02463	1.32904	1.59405	0.0533976	0.82638	0.415339	0.192171
Q3ZWC0	cbdbA69	Alcohol dehydrogenase, iron-containing OS=Dehalococcoides mccartyi (strain CBDB1) GN=cbdbA69 PE=4 SV=1	n.d.	1.51517	1.70906	1.34556		0.0314309	0.154507	0.270939	Metabolism
Q3ZX52	cbdbA643	Alpha-ribazole-5-phosphate phosphatase OS=Dehalococcoides mccartyi (strain CBDB1) GN=cobC PE=4 SV=1	n.d.	1.10497	1.51684	1.67962		0.194966	0.0907159	0.231469	Metabolism of cofactors and vitamins
Q3ZWV4	cbdbA260	Uncharacterized protein OS=Dehalococcoides mccartyi (strain CBDB1) GN=cbdbA260 PE=4 SV=1	1.67946	1.39638	1.14074	1.28647	0.39114	0.564234	0.311571	0.45633
Q3ZYZ8	cbdbA1412	Excisionase family DNA binding protein OS=Dehalococcoides mccartyi (strain CBDB1) GN=cbdbA1412 PE=4 SV=1	n.d.	2.0781	2.34822	Id.		0.384393	0.0761833
Q3ZXT1	cbdbA909	Hsp20 OS=Dehalococcoides mccartyi (strain CBDB1) GN=cbdbA909 PE=3 SV=1	Id.	1.5834	2.31327	Id.		0.984588	0.239501		Folding, sorting and degradation
Q3ZYX6	cbdbA1384	SAM-dependent methyltransferase UbiE/COQ5 family OS=Dehalococcoides mccartyi (strain CBDB1) GN=cbdbA1384 PE=4 SV=1	n.d.	1.84961	1.40256	Id.		0.0267014	0.330963		Metabolism
Q3ZYH4	cbdbA1232	Sensor histidine kinase OS=Dehalococcoides mccartyi (strain CBDB1) GN=cbdbA1232 PE=4 SV=1	n.d.	1.30901	1.11397	Id.		0.217744	0.1074
Q3ZWQ6	cbdbA196	Putative methyltransferase OS=Dehalococcoides mccartyi (strain CBDB1) GN=cbdbA196 PE=4 SV=1	1.66731	1.67542	1.36622	1.68475	0.0962471	0.101665	0.0683228	0.613702
Q3ZWA3	cbdbA24	Transcriptional regulator, Fur family OS=Dehalococcoides mccartyi (strain CBDB1) GN=cbdbA24 PE=4 SV=1	n.d.	2.04883	1.64435	Id.		0.087845	0.232712		Transcription
Q3ZWD7	cbdbA43	UPF0296 protein cbdbA43 OS=Dehalococcoides mccartyi (strain CBDB1) GN=cbdbA43 PE=3 SV=1	Id.	1.78574	1.93443	1.78438		0.278632	0.174023	0.477579	Poorly characterized
Q3ZWD8	cbdbA42	Guanylate kinase OS=Dehalococcoides mccartyi (strain CBDB1) GN=gmk PE=3 SV=1	Id.	1.56701	1.68894	Id.		0.0845565	0.456161		Nucleotide metabolism
Q3ZYG1	cbdbA1182	Uncharacterized protein OS=Dehalococcoides mccartyi (strain CBDB1) GN=cbdbA1182 PE=4 SV=1	n.d.	1.74007	1.49909	Id.		0.0971084	0.262623
Q3ZWL8	cbdbA184	DNA-binding response regulator OS=Dehalococcoides mccartyi (strain CBDB1) GN=rdhD PE=4 SV=1	n.d.	0.962221	1.43355	Id.		0.682102	0.16459		Cellular community - prokaryotes; Signal transduction
Q3ZZJ4	cbdbA413	Putative fumarate hydratase, beta subunit OS=Dehalococcoides mccartyi (strain CBDB1) GN=cbdbA413 PE=4 SV=1	1.6243	1.63191	1.38898	1.46409	0.0714736	0.165824	0.0296135	0.411706	Carbohydrate metabolism; Energy metabolism
Q3ZX80	cbdbA668	Probable phosphoribosylglycinamide transformylase OS=Dehalococcoides mccartyi (strain CBDB1) GN=cbdbA668 PE=4 SV=1	1.67784	1.76731	1.43735	Id.	0.182896	0.2206	0.111194
Q3ZWJ4	cbdbA155	Putative alanine dehydrogenase OS=Dehalococcoides mccartyi (strain CBDB1) GN=arcB PE=3 SV=1	n.d.	1.39732	1.26759	Id.		0.27693	0.366103		Amino acid metabolism; Metabolism of other amino acids
Q3ZXU0	cbdbA950	Mg chelatase, homolog OS=Dehalococcoides mccartyi (strain CBDB1) GN=cbdbA950 PE=4 SV=1	n.d.	1.20916	Id.	Id.		0.111046			Genetic information processing
Q3ZWA2	cbdbA26	Uncharacterized protein OS=Dehalococcoides mccartyi (strain CBDB1) GN=cbdbA26 PE=4 SV=1	n.d.	1.46462	1.75089	Id.		0.132252	0.251546
Q3ZY75	cbdbA1112	Bifunctional protein PyrR OS=Dehalococcoides mccartyi (strain CBDB1) GN=pyrR PE=3 SV=1	n.d.	2.03979	1.92991	Id.		0.0344108	0.478954		Nucleotide metabolism; Transcription
Q3ZYX2	cbdbA1388	Uncharacterized protein OS=Dehalococcoides mccartyi (strain CBDB1) GN=cbdbA1388 PE=4 SV=1	n.d.	1.82389	1.4777	Id.		0.0145671	0.212294
Q3ZX61	cbdbA632	Conserved domain protein OS=Dehalococcoides mccartyi (strain CBDB1) GN=cbdbA632 PE=4 SV=1	Id.	1.27938	1.49992	1.41802		0.440718	0.407029	0.375295	Poorly characterized
Q3ZVW1	cbdbA1565	Sensor histidine kinase OS=Dehalococcoides mccartyi (strain CBDB1) GN=rdhC PE=4 SV=1	n.d.	Id.	1.00472	Id.			0.330974
Q3ZWC6	cbdbA60	DNA polymerase III delta subunit-related protein OS=Dehalococcoides mccartyi (strain CBDB1) GN=holA PE=4 SV=1	n.d.	0.942075	1.0005	Id.		0.0237999	0.042441		Nucleotide metabolism; Replication and repair
Q3ZY32	cbdbA1053	Response regulator OS=Dehalococcoides mccartyi (strain CBDB1) GN=cbdbA1053 PE=4 SV=1	n.d.	1.52723	1.46096	Id.		0.471539	0.204886
Q3ZWQ0	cbdbA203	Uncharacterized protein OS=Dehalococcoides mccartyi (strain CBDB1) GN=cbdbA203 PE=4 SV=1	Id.	1.08552	0.465127	Id.		0.306589	0.565634		Poorly characterized
Q3ZZS1	cbdbA497	Phosphomannomutase OS=Dehalococcoides mccartyi (strain CBDB1) GN=pmmB PE=3 SV=1	Id.	1.56285	Id.	Id.		0.0637926			Carbohydrate metabolism
Q3ZX21	cbdbA621	Uncharacterized protein OS=Dehalococcoides mccartyi (strain CBDB1) GN=cbdbA621 PE=4 SV=1	Id.	1.83759	1.23659	Id.		0.592241	0.0854833
Q3ZW55	cbdbA1685	Putative transcriptional regulator OS=Dehalococcoides mccartyi (strain CBDB1) GN=cbdbA1685 PE=4 SV=1	Id.	1.73875	1.55776	Id.		0.434029	0.240173
Q3ZZV2	cbdbA522	HDIG domain protein OS=Dehalococcoides mccartyi (strain CBDB1) GN=cbdbA522 PE=4 SV=1	1.91945	1.71625	1.61245	Id.	0.0272345	0.0611671	0.0224022
Q3ZZR6	cbdbA505	HAD-superfamily hydrolase, subfamily IA OS=Dehalococcoides mccartyi (strain CBDB1) GN=cbdbA505 PE=4 SV=1	n.d.	1.40289	Id.	n.d.		0.0990057			Poorly characterized
Q3ZXQ5	cbdbA893	Uncharacterized protein OS=Dehalococcoides mccartyi (strain CBDB1) GN=cbdbA893 PE=4 SV=1	n.d.	Id.	1.69742	Id.			0.0660334
Q3ZY66	cbdbA1070	Carbon-nitrogen hydrolase family protein OS=Dehalococcoides mccartyi (strain CBDB1) GN=cbdbA1070 PE=4 SV=1	n.d.	1.36905	1.49288	Id.		0.0766619	0.103169
Q3ZWU3	cbdbA273	Protein-export membrane protein SecF OS=Dehalococcoides mccartyi (strain CBDB1) GN=secF PE=3 SV=1	n.d.	2.13478	2.10585	Id.		0.0756397	0.176884		Folding, sorting and degradation; Membrane transport
Q3ZZR4	cbdbA509	DNA polymerase III, delta prime subunit OS=Dehalococcoides mccartyi (strain CBDB1) GN=holB PE=4 SV=1	n.d.	1.05092	1.2494	Id.		0.00296425	0.0556521		Nucleotide metabolism; Replication and repair
Q3ZVV4	cbdbA1571	Transcriptional regulator, MarR family OS=Dehalococcoides mccartyi (strain CBDB1) GN=rdhR PE=4 SV=1	1.78119	1.64712	1.49954	1.58422	0.0751439	0.327185	0.540301	0.770421
Q3ZXH8	cbdbA816	Putative translation factor Sua5 OS=Dehalococcoides mccartyi (strain CBDB1) GN=cbdbA816 PE=4 SV=1	1.87477	1.80892	1.43698	Id.	0.355593	0.34994	0.487828		Translation
Q3ZYE4	cbdbA1141	Cob(I)alamin adenosyltransferase OS=Dehalococcoides mccartyi (strain CBDB1) GN=cobA PE=4 SV=1	1.58361	1.58129	1.27012	1.48703	0.132771	0.279673	0.356993	0.0238474	Metabolism of cofactors and vitamins
Q3ZWT1	cbdbA230	Uncharacterized protein OS=Dehalococcoides mccartyi (strain CBDB1) GN=cbdbA230 PE=4 SV=1	n.d.	1.41839	1.54041	1.70099		0.345074	0.345823	0.169991
Q3ZW04	cbdbA1625	Transcriptional regulator, MarR family OS=Dehalococcoides mccartyi (strain CBDB1) GN=rdhR PE=4 SV=1	Id.	1.81084	1.61247	1.2513		0.767898	0.137794	0.711613
Q3ZZT5	cbdbA540	Ribosome maturation factor RimM OS=Dehalococcoides mccartyi (strain CBDB1) GN=rimM PE=3 SV=1	n.d.	1.54235	1.24746	1.48104		0.227295	0.143269	0.270227	Translation
Q3ZXM9	cbdbA867	Uncharacterized protein OS=Dehalococcoides mccartyi (strain CBDB1) GN=cbdbA867 PE=4 SV=1	n.d.	1.67444	1.12004	Id.		0.463633	0.651086		Poorly characterized
Q3ZW48	cbdbA1694	Twin-arginine translocation protein, TatA OS=Dehalococcoides mccartyi (strain CBDB1) GN=E PE=4 SV=1	n.d.	2.02355	1.75298	Id.		0.117178	0.525904		Folding, sorting and degradation; Membrane transport
Q3ZZ96	cbdbA292	GatB domain containing protein OS=Dehalococcoides mccartyi (strain CBDB1) GN=cbdbA292 PE=4 SV=1	n.d.	1.71084	1.654	Id.		0.159713	0.153553		Poorly characterized
Q3ZWI8	cbdbA100.1	Uncharacterized protein OS=Dehalococcoides mccartyi (strain CBDB1) GN=cbdbA100.1 PE=4 SV=1	Id.	1.16019	1.61424	1.37234		0.383349	0.081847	0.196997
Q3ZZD7	cbdbA365	Putative deoxycytidylate deaminase OS=Dehalococcoides mccartyi (strain CBDB1) GN=cbdbA365 PE=4 SV=1	n.d.	2.03976	1.45225	Id.		0.199529	0.0828898		Membrane transport; Nucleotide metabolism
Q3ZXH4	cbdbA766	Nuclease SbcD OS=Dehalococcoides mccartyi (strain CBDB1) GN=sbcD PE=4 SV=1	n.d.	1.16397	1.01162	n.d.		0.0693078	0.205656		Replication and repair
Q3ZZ79	cbdbB36	Uncharacterized protein OS=Dehalococcoides mccartyi (strain CBDB1) GN=cbdbA1519.1 PE=4 SV=1	n.d.	1.39242	1.36611	Id.		0.0887961	0.134553		Transport and catabolism
Q3ZZH1	cbdbA381	Type III pantothenate kinase OS=Dehalococcoides mccartyi (strain CBDB1) GN=coaX PE=3 SV=1	Id.	1.74142	1.86324	1.78891		0.210514	0.0900127	0.186854	Metabolism of cofactors and vitamins
Q3ZW49	cbdbA1693	Putative twin-arginine translocation protein TatB OS=Dehalococcoides mccartyi (strain CBDB1) GN=tatB PE=4 SV=1	1.68385	1.88795	2.10628	1.99262	0.00484138	0.25975	0.0375541	0.166511	Folding, sorting and degradation; Membrane transport
Q3ZXP1	cbdbA854	Elongation factor P OS=Dehalococcoides mccartyi (strain CBDB1) GN=efp PE=3 SV=1	n.d.	1.90157	1.36162	Id.		0.195028	0.306005		Translation
Q3ZZQ4	cbdbA458	Protein translocase subunit SecY OS=Dehalococcoides mccartyi (strain CBDB1) GN=secY PE=3 SV=1	1.398	2.76668	2.20446	2.27185	0.40613	0.107241	0.123452	0.72867	Cellular community - prokaryotes; Folding, sorting and degradation; Membrane transport
Q3ZXN2	cbdbA863	Uncharacterized protein OS=Dehalococcoides mccartyi (strain CBDB1) GN=cbdbA863 PE=4 SV=1	Id.	1.93264	1.88994	Id.		0.0254925	0.140158
Q3ZZM5	cbdbA438	30S ribosomal protein S10 OS=Dehalococcoides mccartyi (strain CBDB1) GN=rpsJ PE=3 SV=1	2.70736	3.08208	3.01322	2.84345	0.170344	0.147047	0.0836605	0.320891	Translation
Q3ZXK6	cbdbA839	ABC transporter, ATP-binding protein OS=Dehalococcoides mccartyi (strain CBDB1) GN=cbdbA839 PE=4 SV=1	Id.	1.38509	1.56145	Id.		0.445744	0.112904		Membrane transport
Q3ZW37	cbdbA1647	Transcriptional regulator, MerR family OS=Dehalococcoides mccartyi (strain CBDB1) GN=cbdbA1647 PE=4 SV=1	1.78236	1.64051	1.35852	1.9819	0.567167	0.630362	0.385369	0.714582
Q3ZX55	cbdbA639	Putative threonine-phosphate decarboxylase (L-threonine-O-3-phosphate decarboxylase) OS=Dehalococcoides mccartyi (strain CBDB1) GN=cobD PE=3 SV=1	n.d.	0.861915	Id.	Id.		0.030914
Q3ZWE1	cbdbA74	2-C-methyl-D-erythritol 4-phosphate cytidylyltransferase OS=Dehalococcoides mccartyi (strain CBDB1) GN=ispD PE=3 SV=1	1.75428	1.90501	1.73345	1.76148	0.170745	0.0688477	0.212185	0.0788966	Metabolism of terpenoids and polyketides
Q3ZXJ3	cbdbA797	Uncharacterized protein OS=Dehalococcoides mccartyi (strain CBDB1) GN=cbdbA797 PE=4 SV=1	Id.	1.75846	1.39289	Id.		0.0930961	0.327088
Q3ZXA9	cbdbA733	Peptide deformylase OS=Dehalococcoides mccartyi (strain CBDB1) GN=def PE=3 SV=1	n.d.	1.6214	1.32224	Id.		0.00714278	0.334519		Metabolism
Q3ZX51	cbdbA644	Cobinamide kinase OS=Dehalococcoides mccartyi (strain CBDB1) GN=cobU PE=4 SV=1	1.40443	1.48494	1.564	Id.	0.0931198	0.0450242	0.105949		Metabolism of cofactors and vitamins
Q3ZZ91	cbdbA298	Uncharacterized protein OS=Dehalococcoides mccartyi (strain CBDB1) GN=cbdbA298 PE=4 SV=1	n.d.	1.28319	1.62674	n.d.		0.0382129	0.241585		Poorly characterized
Q3ZXB7	cbdbA724	50S ribosomal protein L35 OS=Dehalococcoides mccartyi (strain CBDB1) GN=rpmI PE=3 SV=1	Id.	2.94618	2.44501	Id.		0.0719958	0.0647799		Translation
Q3ZWY3	cbdbA547	ABC-type dipeptide/oligopeptide/nickel transport system, periplasmic component OS=Dehalococcoides mccartyi (strain CBDB1) GN=cbdbA547 PE=4 SV=1	1.43502	1.85534	1.63323	1.93242	0.5747	0.0624022	0.115053	0.0318772	Cellular community - prokaryotes; Drug resistance; Membrane transport
Q3ZX23	cbdbA619	Cation ABC transporter, ATP-binding protein OS=Dehalococcoides mccartyi (strain CBDB1) GN=cbdbA619 PE=3 SV=1	n.d.	1.63648	1.27975	Id.		0.115065	0.504729		Membrane transport
Q3ZW61	cbdbA1678	Serine acetyltransferase OS=Dehalococcoides mccartyi (strain CBDB1) GN=cysE PE=3 SV=1	Id.	1.78264	1.8064	Id.		0.22288	0.063601		Amino acid metabolism; Cellular community - prokaryotes; Energy metabolism
Q3ZWY1	cbdbA553	Aminotransferase, classes I and II OS=Dehalococcoides mccartyi (strain CBDB1) GN=cbdbA553 PE=4 SV=1	Id.	1.32419	Id.	Id.		0.182778
Q3ZY51	cbdbA1087	ABC transporter, ATP-binding/permease protein OS=Dehalococcoides mccartyi (strain CBDB1) GN=cbdbA1087 PE=3 SV=1	n.d.	1.2213	0.791147	Id.		0.404331	0.254679		Membrane transport
Q3ZXY9	cbdbA994	Ribonuclease 3 OS=Dehalococcoides mccartyi (strain CBDB1) GN=rnc PE=3 SV=1	Id.	1.83055	1.82566	Id.		0.0813474	0.0752216		Cancers; Replication and repair; Translation
Q3ZWR0	cbdbA190	Membrane protein, TerC family OS=Dehalococcoides mccartyi (strain CBDB1) GN=cbdbA190 PE=4 SV=1	n.d.	1.54517	1.47544	n.d.		0.823451	0.681527		Cellular processes and signaling
Q3ZY36	cbdbA1049	Glutamine-dependent NAD(+) synthetase OS=Dehalococcoides mccartyi (strain CBDB1) GN=nadE PE=3 SV=1	1.19927	1.49301	1.71844	Id.	0.642534	0.251088	0.279864		Metabolism of cofactors and vitamins
Q3ZXU2	cbdbA948	Uncharacterized protein OS=Dehalococcoides mccartyi (strain CBDB1) GN=cbdbA948 PE=4 SV=1	n.d.	2.12674	1.95716	Id.		0.0341652	0.161899		Poorly characterized
Q3ZXJ4	cbdbA796	Thymidylate synthase OS=Dehalococcoides mccartyi (strain CBDB1) GN=thyA PE=4 SV=1	n.d.	Id.	1.36071	n.d.			0.59446		Drug resistance; Metabolism of cofactors and vitamins; Nucleotide metabolism
Q3ZWG1	cbdbA79	Sensor histidine kinase OS=Dehalococcoides mccartyi (strain CBDB1) GN=rdhC PE=4 SV=1	n.d.	1.34189	Id.	Id.		0.0503684
Q3ZX10	cbdbA574	Uncharacterized protein OS=Dehalococcoides mccartyi (strain CBDB1) GN=cbdbA574 PE=4 SV=1	n.d.	1.54365	1.4483	Id.		0.0916458	0.292679		Poorly characterized
Q3ZWT9	cbdbA218	PBS lyase HEAT-like repeat domain protein OS=Dehalococcoides mccartyi (strain CBDB1) GN=cbdbA218 PE=4 SV=1	Id.	Id.	1.71004	Id.			0.096064
Q3ZZQ6	cbdbA456	50S ribosomal protein L30 OS=Dehalococcoides mccartyi (strain CBDB1) GN=rpmD PE=3 SV=1	2.17153	2.75813	2.49179	2.59872	0.436617	0.0359312	0.25087	0.0993733	Translation
Q3ZW83	cbdbA1701	Regulatory protein RecX OS=Dehalococcoides mccartyi (strain CBDB1) GN=recX PE=3 SV=1	Id.	1.4261	1.14399	1.4777		0.387615	0.194496	0.221752	Replication and repair
Q3ZXP3	cbdbA851	Hydrogenase, EchF subunit OS=Dehalococcoides mccartyi (strain CBDB1) GN=cbdbA851 PE=4 SV=1	Id.	1.71959	2.10737	Id.		0.54479	0.134417
Q3ZVY0	cbdbA1596	Transcriptional regulator, MarR family OS=Dehalococcoides mccartyi (strain CBDB1) GN=rdhR PE=4 SV=1	n.d.	2.18577	1.97429	n.d.		0.0272707	0.258018
Q3ZXR6	cbdbA880	Proton-translocating NADH-quinone oxidoreductase, I subunit OS=Dehalococcoides mccartyi (strain CBDB1) GN=cbdbA880 PE=4 SV=1	n.d.	Id.	0.674684	Id.			1.00175		Energy metabolism
Q3ZVS8	cbdbA1547	Sensor histidine kinase OS=Dehalococcoides mccartyi (strain CBDB1) GN=rdhC PE=4 SV=1	n.d.	1.25618	1.52887	Id.		0.206089	0.0455543
Q3ZX13	cbdbA570	Uncharacterized protein OS=Dehalococcoides mccartyi (strain CBDB1) GN=cbdbA570 PE=4 SV=1	n.d.	1.68791	1.54652	Id.		0.0690643	0.0239992
Q3ZVY5	cbdbA1590	Sensor histidine kinase OS=Dehalococcoides mccartyi (strain CBDB1) GN=rdhC PE=4 SV=1	n.d.	1.01519	0.951189	Id.		0.319175	0.354593
Q3ZZX9	cbdbA1717	Uncharacterized protein OS=Dehalococcoides mccartyi (strain CBDB1) GN=cbdbA1717 PE=4 SV=1	n.d.	2.27281	2.21221	2.271		0.0720392	0.0357279	0.182298
Q3ZWI2	cbdbA105	Putative type I restriction enzyme, specificity protein OS=Dehalococcoides mccartyi (strain CBDB1) GN=cbdbA105 PE=4 SV=1	n.d.	1.87012	1.8389	Id.		0.0577347	0.0056994		Transport and catabolism
Q3ZZL1	cbdbB14	30S ribosomal protein S14 type Z OS=Dehalococcoides mccartyi (strain CBDB1) GN=rpsZ PE=3 SV=1	2.29349	2.41565	2.57672	2.37181	0.361922	0.419544	0.0336922	0.420056	Translation
Q3ZX15	cbdbA627	Putative ribulose-phosphate 3-epimerase OS=Dehalococcoides mccartyi (strain CBDB1) GN=cbdbA627 PE=4 SV=1	n.d.	1.49481	1.60203	Id.		0.00936095	0.10308		Carbohydrate metabolism; Energy metabolism
Q3ZYB6	cbdbA1119	Dihydroorotate dehydrogenase, electron transfersubunit OS=Dehalococcoides mccartyi (strain CBDB1) GN=pyrK PE=4 SV=1	1.7311	1.74566	1.79997	1.61389	0.290356	0.239615	0.182188	0.121287	Nucleotide metabolism
Q3ZZ46	cbdbA1509	Transcriptional regulator, MarR family OS=Dehalococcoides mccartyi (strain CBDB1) GN=rdhR PE=4 SV=1	1.33495	1.18635	1.11122	1.35792	0.114982	0.270234	0.317068	0.38541
Q3ZWY6	cbdbA543	Peptide chain release factor 2 OS=Dehalococcoides mccartyi (strain CBDB1) GN=prfB PE=4 SV=1	1.61126	1.53903	1.5107	Id.	0.112303	0.569747	0.393766		Translation
Q3ZZ95	cbdbA293	30S ribosomal protein S21 OS=Dehalococcoides mccartyi (strain CBDB1) GN=rpsU PE=3 SV=1	1.71044	2.62871	2.76017	2.18506	0.304438	0.675788	0.136841	0.654524	Translation
Q3ZXR0	cbdbA887	Hydrolase, TatD family OS=Dehalococcoides mccartyi (strain CBDB1) GN=cbdbA887 PE=4 SV=1	n.d.	1.42409	1.5493	Id.		0.00369937	0.151639		Genetic information processing
Q3ZZX8	cbdbA1718	Uncharacterized protein OS=Dehalococcoides mccartyi (strain CBDB1) GN=cbdbA1718 PE=4 SV=1	n.d.	1.47858	1.73633	1.38929		0.0315743	0.2588	0.0919032
Q3ZYS0	cbdbA1340	tRNA-2-methylthio-N(6)-dimethylallyladenosine synthase OS=Dehalococcoides mccartyi (strain CBDB1) GN=miaB PE=3 SV=1	n.d.	0.941175	Id.	n.d.		0.0676554			Translation
Q3ZX81	cbdbA667	Carbohydrate kinase, PfkB family OS=Dehalococcoides mccartyi (strain CBDB1) GN=cbdbA667 PE=4 SV=1	1.15103	1.41429	1.26805	Id.	0.0914306	0.248675	0.399741		Carbohydrate metabolism
Q3ZXN0	cbdbA865	Uncharacterized protein OS=Dehalococcoides mccartyi (strain CBDB1) GN=cbdbA865 PE=4 SV=1	1.77193	1.92292	1.61697	Id.	0.0210392	0.0710679	0.471216
Q3ZYZ1	cbdbA1420	Uncharacterized protein OS=Dehalococcoides mccartyi (strain CBDB1) GN=cbdbA1420 PE=4 SV=1	n.d.	Id.	0.659951	Id.			0.273343		Poorly characterized
Q3ZW86	cbdbA1698	2-amino-4-hydroxy-6-hydroxymethyldihydropteridine pyrophosphokinase OS=Dehalococcoides mccartyi (strain CBDB1) GN=folK PE=4 SV=1	1.55984	1.11576	Id.	1.6565	0.0534732	0.814898		0.547862	Metabolism of cofactors and vitamins
Q3ZZD4	cbdbA305	Carboxyl-terminal protease OS=Dehalococcoides mccartyi (strain CBDB1) GN=prc PE=3 SV=1	1.71283	1.50315	1.41188	Id.	0.0550694	0.0908986	0.371408		Enzyme families
Q3ZYU8	cbdbA1363	Uncharacterized protein OS=Dehalococcoides mccartyi (strain CBDB1) GN=cbdbA1363 PE=4 SV=1	Id.	2.34671	2.01689	2.1099		0.0155588	0.393061	0.421591
Q3ZWZ8	cbdbA589	Uncharacterized protein OS=Dehalococcoides mccartyi (strain CBDB1) GN=cbdbA589 PE=4 SV=1	Id.	1.77569	1.81491	Id.		0.134405	0.00768217		Translation
Q3ZYP2	cbdbA1318	Uncharacterized protein OS=Dehalococcoides mccartyi (strain CBDB1) GN=cbdbA1318 PE=4 SV=1	2.23905	1.62973	0.954269	1.62937	0.360389	0.857057	0.468381	0.674116
Q3ZXK1	cbdbA844	Hydrogenase, group 4, EchC subunit OS=Dehalococcoides mccartyi (strain CBDB1) GN=echC PE=4 SV=1	1.83085	2.44544	2.30653	Id.	0.149082	0.408892	0.196975
Q3ZWN1	cbdbA169	Putative [Fe] hydrogenase, HymA subunit OS=Dehalococcoides mccartyi (strain CBDB1) GN=hymA PE=4 SV=1	n.d.	2.30359	2.0664	Id.		0.00136881	0.359165		Energy metabolism
Q3ZWU5	cbdbA270	Histone deacetylase family protein OS=Dehalococcoides mccartyi (strain CBDB1) GN=cbdbA270 PE=4 SV=1	n.d.	1.0346	Id.	Id.		0.0253294
Q3ZWU4	cbdbA271	Cation efflux family protein OS=Dehalococcoides mccartyi (strain CBDB1) GN=cbdbA271 PE=4 SV=1	n.d.	Id.	1.48464	0.944893			0.230021	0.675543
Q3ZW10	cbdbA1619	Transcriptional regulator, MarR family OS=Dehalococcoides mccartyi (strain CBDB1) GN=rdhR PE=4 SV=1	n.d.	1.58859	1.06382	Id.		0.0361877	0.58987
Q3ZZE3	cbdbA359	Conserved domain protein OS=Dehalococcoides mccartyi (strain CBDB1) GN=cbdbA359 PE=4 SV=1	n.d.	1.90211	1.97606	Id.		0.0441024	0.260647
Q3ZZR7	cbdbA504	Putative phosphatidylethanolamine-binding protein OS=Dehalococcoides mccartyi (strain CBDB1) GN=cbdbA504 PE=4 SV=1	n.d.	0.937341	1.31251	Id.		0.147119	0.140889		Poorly characterized
Q3ZXG7	cbdbA774	Transport permease protein OS=Dehalococcoides mccartyi (strain CBDB1) GN=cbdbA774 PE=3 SV=1	n.d.	2.17442	1.80564	Id.		0.00619714	0.160962		Membrane transport
Q3ZWY8	cbdbB15	30S ribosomal protein S16 OS=Dehalococcoides mccartyi (strain CBDB1) GN=rpsP PE=3 SV=1	n.d.	2.35562	2.19026	Id.		0.0523419	0.15316		Translation
Q3ZWG5	cbdbA75	2-C-methyl-D-erythritol 2,4-cyclodiphosphate synthase OS=Dehalococcoides mccartyi (strain CBDB1) GN=ispF PE=3 SV=1	Id.	0.580275	1.25486	1.55936		0.154114	0.745438	0.0584893	Metabolism of terpenoids and polyketides
Q3ZZF7	cbdbA342	Ribosomal silencing factor RsfS OS=Dehalococcoides mccartyi (strain CBDB1) GN=rsfS PE=3 SV=1	n.d.	1.5699	1.74863	Id.		0.12808	0.232423		Translation
Q3ZYQ9	cbdbA1300	DNA-binding protein, excisionase family OS=Dehalococcoides mccartyi (strain CBDB1) GN=cbdbA1300 PE=4 SV=1	1.86217	1.91872	2.13948	1.71334	0.389236	0.140502	0.137056	0.245289
Q3ZXN7	cbdbA858	Uncharacterized protein OS=Dehalococcoides mccartyi (strain CBDB1) GN=cbdbA858 PE=4 SV=1	n.d.	1.84304	1.58211	Id.		0.0189376	0.052725
Q3ZZ21	cbdbA1438	Uncharacterized protein OS=Dehalococcoides mccartyi (strain CBDB1) GN=cbdbA1438 PE=4 SV=1	Id.	1.511	1.3742	1.98039		0.215548	0.416944	0.356165
Q3ZXX4	cbdbA959	50S ribosomal protein L33 OS=Dehalococcoides mccartyi (strain CBDB1) GN=rpmG PE=3 SV=1	n.d.	2.89807	2.79665	Id.		0.0686276	0.14367		Translation
Q3ZXQ7	cbdbA891	Thioesterase family protein OS=Dehalococcoides mccartyi (strain CBDB1) GN=cbdbA891 PE=4 SV=1	n.d.	1.56152	1.45903	1.53117		0.0313913	0.125155	0.139049	Amino acid metabolism
Q3ZYG7	cbdbA1174	Uncharacterized protein OS=Dehalococcoides mccartyi (strain CBDB1) GN=cbdbA1174 PE=4 SV=1	n.d.	0.761491	1.6005	n.d.		0.206603	0.36215
Q3ZWJ6	cbdbA153	Putative response regulator OS=Dehalococcoides mccartyi (strain CBDB1) GN=cbdbA153 PE=4 SV=1	1.39397	1.70953	1.27635	1.33028	0.00762585	0.103021	0.492361	0.245885
Q3ZW16	cbdbA1612	ABC-transporter, ATPase and permease component OS=Dehalococcoides mccartyi (strain CBDB1) GN=cbdbA1612 PE=3 SV=1	0.758446	1.30301	1.31325	1.30024	0.310706	0.124735	0.267809	0.349394	Membrane transport
Q3ZXE7	cbdbA741	Metallopeptidase, M50 family OS=Dehalococcoides mccartyi (strain CBDB1) GN=cbdbA741 PE=4 SV=1	n.d.	1.15014	1.28013	n.d.		0.291747	0.328485
Q3ZXT5	cbdbA905	Conserved domain protein OS=Dehalococcoides mccartyi (strain CBDB1) GN=cbdbA905 PE=4 SV=1	Id.	1.69198	1.88348	1.43746		0.530589	0.123142	0.0330527
Q3ZW85	cbdbA1699	6-carboxy-5,6,7,8-tetrahydropterin synthase OS=Dehalococcoides mccartyi (strain CBDB1) GN=ptpS PE=3 SV=1	1.93151	1.73314	1.4135	1.69438	0.0204	0.612553	0.188177	0.539823	Metabolism of cofactors and vitamins; Translation
Q3ZXV9	cbdbA928	ATP-dependent RNA helicase, DEAD OS=Dehalococcoides mccartyi (strain CBDB1) GN=cbdbA928 PE=4 SV=1	1.24069	Id.	Id.	Id.	0.226181				Poorly characterized
Q3ZY26	cbdbA1033	Sensor histidine kinase OS=Dehalococcoides mccartyi (strain CBDB1) GN=cbdbA1033 PE=4 SV=1	1.77109	2.08517	1.75265	0.883991	0.0901291	0.397792	1.04344	0.333382	Enzyme families; Signal transduction
Q3ZXM0	cbdbA823	Phosphoribosylaminoimidazole-succinocarboxamide synthase OS=Dehalococcoides mccartyi (strain CBDB1) GN=purC PE=3 SV=1	n.d.	1.30708	Id.	Id.		0.461174			Nucleotide metabolism
Q3ZZC8	cbdbA313	Putative membrane-associated zinc metalloprotease OS=Dehalococcoides mccartyi (strain CBDB1) GN=cbdbA313 PE=4 SV=1	n.d.	1.14809	1.19051	Id.		0.12815	0.195359		Cell growth and death; Cellular community - prokaryotes; Enzyme families
Q3ZYD2	cbdbA1156	Uncharacterized protein OS=Dehalococcoides mccartyi (strain CBDB1) GN=cbdbA1156 PE=4 SV=1	n.d.	1.42294	Id.	n.d.		0.0550949
Q3ZXH3	cbdbA767	Pseudouridine synthase OS=Dehalococcoides mccartyi (strain CBDB1) GN=cbdbA767 PE=3 SV=1	n.d.	1.33312	n.d.	n.d.		0.131359			Translation
Q3ZZW4	cbdbA1737	Uncharacterized protein OS=Dehalococcoides mccartyi (strain CBDB1) GN=cbdbA1737 PE=4 SV=1	1.35705	1.81318	2.18761	Id.	0.318453	0.526753	0.0590283		Poorly characterized
Q3ZYY4	cbdbA1432	DNA repair protein, RadC family OS=Dehalococcoides mccartyi (strain CBDB1) GN=cbdbA1432 PE=3 SV=1	n.d.	0.815906	1.29526	1.59218		0.177374	0.224417	0.102848	Genetic information processing
Q3ZXA6	cbdbA687	Mercuric reductase OS=Dehalococcoides mccartyi (strain CBDB1) GN=cbdbA687 PE=4 SV=1	1.54927	1.24602	1.45578	1.26522	0.500751	0.705109	0.119724	0.0837018
Q3ZY54	cbdbA1083	Putative transcriptional regulator, PadR-like family OS=Dehalococcoides mccartyi (strain CBDB1) GN=cbdbA1083 PE=4 SV=1	n.d.	1.24721	1.34318	Id.		0.122554	0.05913
Q3ZYQ2	cbdbA1307	Uncharacterized protein OS=Dehalococcoides mccartyi (strain CBDB1) GN=cbdbA1307 PE=4 SV=1	n.d.	1.58683	1.14989	Id.		0.0787821	0.53727
Q3ZXG5	cbdbA776	5'-nucleotidase SurE OS=Dehalococcoides mccartyi (strain CBDB1) GN=surE PE=3 SV=1	n.d.	1.19073	1.36031	Id.		0.162107	0.195893		Metabolism of cofactors and vitamins; Nucleotide metabolism
Q3ZWC4	cbdbA63	Transcriptional repressor, ROK family OS=Dehalococcoides mccartyi (strain CBDB1) GN=cbdbA63 PE=4 SV=1	n.d.	1.11893	1.20887	n.d.		0.0259468	0.14057		Biosynthesis of other secondary metabolites; Carbohydrate metabolism
Q3ZYS1	cbdbA1339	Preprotein translocase, YajC subunit OS=Dehalococcoides mccartyi (strain CBDB1) GN=yajC PE=4 SV=1	1.5419	2.17916	2.34115	Id.	0.220429	0.516832	0.121751		Cellular community - prokaryotes; Folding, sorting and degradation; Membrane transport
Q3ZXX1	cbdbA963	Glycosyl transferase, group 1 family protein OS=Dehalococcoides mccartyi (strain CBDB1) GN=cbdbA963 PE=4 SV=1	n.d.	1.3085	1.3595	n.d.		0.15211	0.18796		Metabolism
Q3ZZE7	cbdbA354	Serine/threonine protein phosphatase family protein OS=Dehalococcoides mccartyi (strain CBDB1) GN=cbdbA354 PE=4 SV=1	n.d.	1.00787	1.31072	Id.		0.416816	0.29089
Q3ZWV2	cbdbA262	Transcriptional regulator cNTP-binding, Crp OS=Dehalococcoides mccartyi (strain CBDB1) GN=cbdbA262 PE=4 SV=1	n.d.	n.d.	0.835292	Id.			0.52509		Cellular community - prokaryotes; Signal transduction; Transcription
Q3ZZ77	cbdbB37	Uncharacterized protein OS=Dehalococcoides mccartyi (strain CBDB1) GN=cbdbA1520.1 PE=4 SV=1	1.98456	1.84836	1.67817	1.74088	0.0223212	0.20131	0.206125	0.204744	Transport and catabolism
Q3ZYK8	cbdbA1247	Uncharacterized protein OS=Dehalococcoides mccartyi (strain CBDB1) GN=cbdbA1247 PE=4 SV=1	n.d.	Id.	2.51965	2.33032			0.171828	0.571168	Poorly characterized
Q3ZVY3	cbdbA1593	Nitrogenase iron-molybdenum cofactor maturation domain protein OS=Dehalococcoides mccartyi (strain CBDB1) GN=cbdbA1593 PE=4 SV=1	n.d.	1.43507	Id.	n.d.		0.161911
Q3ZYI8	cbdbA1208	Acyl carrier protein OS=Dehalococcoides mccartyi (strain CBDB1) GN=acpP PE=3 SV=1	2.72419	2.81325	2.68582	2.421	0.29594	0.0804893	0.284167	1.02823	Lipid metabolism
Q3ZZ97	cbdbA290	Radical SAM domain protein OS=Dehalococcoides mccartyi (strain CBDB1) GN=cbdbA290 PE=4 SV=1	n.d.	1.19142	Id.	Id.		0.0573855
Q3ZXC6	cbdbA716	tRNA dimethylallyltransferase OS=Dehalococcoides mccartyi (strain CBDB1) GN=miaA PE=3 SV=1	n.d.	1.17342	n.d.	Id.		0.150227			Metabolism of terpenoids and polyketides; Translation
Q3ZWC9	cbdbA56	Redox family protein OS=Dehalococcoides mccartyi (strain CBDB1) GN=cbdbA56 PE=4 SV=1	n.d.	1.78703	1.4386	Id.		0.0667216	0.160865
Q3ZX63	cbdbA630	Nitroreductase family protein OS=Dehalococcoides mccartyi (strain CBDB1) GN=cbdbA630 PE=4 SV=1	n.d.	Id.	Id.	Id.
Q3ZW50	cbdbA1691	Sec-independent protein translocase protein TatC OS=Dehalococcoides mccartyi (strain CBDB1) GN=tatC PE=3 SV=1	n.d.	1.09826	Id.	Id.		0.356621			Folding, sorting and degradation; Membrane transport
Q3ZZB0	cbdbA275	PolyA polymerase family protein OS=Dehalococcoides mccartyi (strain CBDB1) GN=cbdbA275 PE=3 SV=1	n.d.	Id.	1.02462	n.d.			0.287627		Folding, sorting and degradation; Translation
Q3ZZW7	cbdbA1733	Uncharacterized protein OS=Dehalococcoides mccartyi (strain CBDB1) GN=cbdbA1733 PE=4 SV=1	n.d.	2.14191	2.11231	Id.		0.455205	0.398415
Q3ZWG2	cbdbA78	DNA-binding response regulator OS=Dehalococcoides mccartyi (strain CBDB1) GN=rdhD PE=4 SV=1	1.81994	1.56175	Id.	1.26117	0.279808	0.111169		0.767169	Cellular community - prokaryotes; Signal transduction
Q3ZWN8	cbdbA160	Methylglyoxal synthase OS=Dehalococcoides mccartyi (strain CBDB1) GN=mgsA PE=3 SV=1	1.51679	1.48946	1.41586	Id.	0.170539	0.18713	0.443218		Carbohydrate metabolism
Q3ZYQ1	cbdbA1308	Uncharacterized protein OS=Dehalococcoides mccartyi (strain CBDB1) GN=cbdbA1308 PE=4 SV=1	n.d.	1.65295	1.55954	Id.		0.058458	0.164359
Q3ZX37	cbdbA614	Uncharacterized protein OS=Dehalococcoides mccartyi (strain CBDB1) GN=cbdbA614 PE=4 SV=1	Id.	1.73234	1.81389	Id.		0.340712	0.155551
Q3ZW25	cbdbA1662	Uncharacterized protein OS=Dehalococcoides mccartyi (strain CBDB1) GN=cbdbA1662 PE=4 SV=1	2.23085	1.63148	1.30396	1.91997	0.179462	0.713485	0.206711	0.588696
Q3ZYN0	cbdbA1277	Acetyltransferase, GNAT family OS=Dehalococcoides mccartyi (strain CBDB1) GN=cbdbA1277 PE=4 SV=1	n.d.	1.75953	1.57205	Id.		0.102952	0.0364245
Q3ZX77	cbdbA671	Metallopeptidase, M24 family OS=Dehalococcoides mccartyi (strain CBDB1) GN=cbdbA671 PE=3 SV=1	n.d.	1.5771	Id.	Id.		0.411958			Enzyme families
Q3ZW00	cbdbA1630	DNA-binding response regulator OS=Dehalococcoides mccartyi (strain CBDB1) GN=rdhD PE=4 SV=1	n.d.	Id.	1.30718	n.d.			0.312796		Cellular community - prokaryotes; Signal transduction
Q3ZWJ3	cbdbA156	Uncharacterized protein OS=Dehalococcoides mccartyi (strain CBDB1) GN=cbdbA156 PE=4 SV=1	1.8635	1.69541	1.4121	Id.	0.127907	0.587819	0.0858176
Q3ZXH2	cbdbA768	Putative phosphoribosyltransferase OS=Dehalococcoides mccartyi (strain CBDB1) GN=cbdbA768 PE=4 SV=1	Id.	1.70236	2.06219	Id.		0.384794	0.238895
Q3ZW31	cbdbA1653	Hydrogenase, group 4, HycE subunit OS=Dehalococcoides mccartyi (strain CBDB1) GN=hycE PE=4 SV=1	Id.	1.33901	n.d.	1.26787		0.0933273		0.430103
Q3ZVW2	cbdbA1564	DNA-binding response regulator OS=Dehalococcoides mccartyi (strain CBDB1) GN=rdhD PE=4 SV=1	n.d.	0.997224	1.52485	Id.		0.763729	0.259206		Cellular community - prokaryotes; Signal transduction
Q3ZWY5	cbdbA545	Uncharacterized protein OS=Dehalococcoides mccartyi (strain CBDB1) GN=cbdbA545 PE=4 SV=1	n.d.	1.21498	1.37568	Id.		0.0248116	0.198122
Q3ZXG0	cbdbA781	3-methyl-2-oxobutanoate hydroxymethyltransferase OS=Dehalococcoides mccartyi (strain CBDB1) GN=panB PE=3 SV=1	n.d.	1.21787	1.44819	Id.		0.150799	0.232061		Metabolism of cofactors and vitamins
Q3ZWV1	cbdbA263	Patatin-like phospholipase family protein OS=Dehalococcoides mccartyi (strain CBDB1) GN=cbdbA263 PE=4 SV=1	1.65239	1.08389	0.962254	1.46963	0.146055	0.0616995	0.103523	0.498185	Poorly characterized
Q3ZYR2	cbdbA1297	Uncharacterized protein OS=Dehalococcoides mccartyi (strain CBDB1) GN=cbdbA1297 PE=4 SV=1	n.d.	0.883439	1.40136	Id.		0.157955	0.0992363
Q3ZZH4	cbdbA377	Uncharacterized protein OS=Dehalococcoides mccartyi (strain CBDB1) GN=cbdbA377 PE=4 SV=1	Id.	Id.	1.75725	Id.			0.42852
Q3ZZ19	cbdbA1440	Uncharacterized protein OS=Dehalococcoides mccartyi (strain CBDB1) GN=cbdbA1440 PE=4 SV=1	n.d.	2.36667	1.59988	Id.		0.0365503	0.782047
Q3ZWP8	cbdbA206	Uncharacterized protein OS=Dehalococcoides mccartyi (strain CBDB1) GN=cbdbA206 PE=4 SV=1	n.d.	n.d.	1.31747	n.d.			0.273095
Q3ZY92	cbdbA1095	Uncharacterized protein OS=Dehalococcoides mccartyi (strain CBDB1) GN=cbdbA1095 PE=4 SV=1	n.d.	n.d.	Id.	n.d.
Q3ZXU4	cbdbA946	Ribosome-binding factor A OS=Dehalococcoides mccartyi (strain CBDB1) GN=rbfA PE=3 SV=1	n.d.	1.91825	1.82764	Id.		0.0162701	0.0317617		Translation
Q3ZYN2	cbdbA1275	Putative membrane protein OS=Dehalococcoides mccartyi (strain CBDB1) GN=cbdbA1275 PE=4 SV=1	n.d.	1.36983	1.49392	Id.		0.538447	0.205258
Q3ZZI1	cbdbA370	Amino acid ABC transporter, permease protein OS=Dehalococcoides mccartyi (strain CBDB1) GN=cbdbA370 PE=3 SV=1	n.d.	0.943299	1.26342	n.d.		0.221816	0.137776		Membrane transport
Q3ZVU3	cbdbB39	Uncharacterized protein OS=Dehalococcoides mccartyi (strain CBDB1) GN=cbdbA1533.1 PE=4 SV=1	Id.	2.0118	2.25475	Id.		0.26237	0.0173892
Q3ZW88	cbdbA3	Probable nicotinate-nucleotide adenylyltransferase OS=Dehalococcoides mccartyi (strain CBDB1) GN=nadD PE=3 SV=1	Id.	1.25279	1.25004	n.d.		0.133621	0.261412		Metabolism of cofactors and vitamins
Q3ZWN2	cbdbA168	Arsenate reductase OS=Dehalococcoides mccartyi (strain CBDB1) GN=arsC PE=4 SV=1	Id.	1.54965	1.38631	Id.		0.138137	0.335222		Metabolism
Q3ZZK5	cbdbA399	Crossover junction endodeoxyribonuclease RuvC OS=Dehalococcoides mccartyi (strain CBDB1) GN=ruvC PE=3 SV=1	1.55283	Id.	0.916619	Id.	0.313269		0.615168		Replication and repair
Q3ZZF8	cbdbA340	AP endonuclease, family 2 protein OS=Dehalococcoides mccartyi (strain CBDB1) GN=cbdbA340 PE=4 SV=1	n.d.	Id.	1.29111	Id.			0.0232671		Replication and repair
Q3ZWD0	cbdbA55	Uncharacterized protein OS=Dehalococcoides mccartyi (strain CBDB1) GN=cbdbA55 PE=4 SV=1	n.d.	0.472141	Id.	n.d.		0.150482
Q3ZYL3	cbdbA1240	Uncharacterized protein OS=Dehalococcoides mccartyi (strain CBDB1) GN=cbdbA1240 PE=4 SV=1	n.d.	1.19479	1.58056	Id.		0.109443	0.197624
Q3ZXB0	cbdbA732	2,3-diketo-5-methylthio-1-phosphopentanephosphatase family protein OS=Dehalococcoides mccartyi (strain CBDB1) GN=cbdbA732 PE=4 SV=1	n.d.	1.4239	Id.	0.882479		0.233988		0.453003
Q3ZWR5	cbdbA186	Uncharacterized protein OS=Dehalococcoides mccartyi (strain CBDB1) GN=cbdbA186 PE=4 SV=1	n.d.	1.33272	1.4122	Id.		0.153352	0.295644
Q3ZZ10	cbdbA1451	Tryptophan synthase alpha chain OS=Dehalococcoides mccartyi (strain CBDB1) GN=trpA PE=3 SV=1	n.d.	2.13709	2.25403	Id.		0.430633	0.094673		Amino acid metabolism
Q3ZW54	cbdbA1686	ApbE OS=Dehalococcoides mccartyi (strain CBDB1) GN=cbdbA1686 PE=4 SV=1	n.d.	0.819011	0.306405	Id.		0.0856347	0.229577		Metabolism
Q3ZZ37	cbdbA1471	Uncharacterized protein OS=Dehalococcoides mccartyi (strain CBDB1) GN=cbdbA1471 PE=4 SV=1	n.d.	1.17591	1.67164	Id.		0.100062	0.184602
Q3ZY65	cbdbA1071	Glycosyl transferase OS=Dehalococcoides mccartyi (strain CBDB1) GN=cbdbA1071 PE=4 SV=1	n.d.	1.17272	Id.	Id.		0.124003
Q3ZXM7	cbdbA869	Uncharacterized protein OS=Dehalococcoides mccartyi (strain CBDB1) GN=cbdbA869 PE=4 SV=1	n.d.	1.67196	1.39063	Id.		0.264911	0.226801
Q3ZYH6	cbdbA1229	Probable competence-damage inducible protein CinA OS=Dehalococcoides mccartyi (strain CBDB1) GN=cbdbA1229 PE=4 SV=1	n.d.	1.43316	1.53612	n.d.		0.0367878	0.240849
Q3ZZW1	cbdbA1741	Aldolase, class II OS=Dehalococcoides mccartyi (strain CBDB1) GN=cbdbA1741 PE=4 SV=1	Id.	1.87824	1.87491	Id.		0.0707592	0.123414		Carbohydrate metabolism
Q3ZWR6	cbdbA215	Oxidoreductase, aldo reductase OS=Dehalococcoides mccartyi (strain CBDB1) GN=cbdbA215 PE=4 SV=1	n.d.	1.2345	1.25873	n.d.		0.311722	0.267115
Q3ZXS6	cbdbA916	Imidazoleglycerol phosphate synthase, cyclase subunit OS=Dehalococcoides mccartyi (strain CBDB1) GN=hisF PE=3 SV=1	n.d.	1.2328	Id.	Id.		0.028986			Amino acid metabolism
Q3ZYA3	cbdbA1134	UvrABC system protein C OS=Dehalococcoides mccartyi (strain CBDB1) GN=uvrC PE=3 SV=1	Id.	1.12478	0.913013	n.d.		0.363466	0.0481767		Replication and repair
Q3ZX25	cbdbA612	Sensor histidine kinase OS=Dehalococcoides mccartyi (strain CBDB1) GN=cbdbA612 PE=4 SV=1	n.d.	1.25564	Id.	n.d.		0.087901
Q3ZXN3	cbdbA862	Putative phosphoribosyltransferase OS=Dehalococcoides mccartyi (strain CBDB1) GN=cbdbA862 PE=4 SV=1	n.d.	n.d.	1.18872	Id.			0.154804
Q3ZWS4	cbdbA240	DNA-binding response regulator OS=Dehalococcoides mccartyi (strain CBDB1) GN=rdhD PE=4 SV=1	Id.	Id.	Id.	Id.					Cellular community - prokaryotes; Signal transduction
Q3ZY80	cbdbA1107	Signal peptidase I OS=Dehalococcoides mccartyi (strain CBDB1) GN=lepB PE=3 SV=1	n.d.	1.33604	1.11687	n.d.		0.277346	0.122339		Cellular community - prokaryotes; Enzyme families; Folding, sorting and degradation
Q3ZWC2	cbdbA67	Putative Holliday junction resolvase OS=Dehalococcoides mccartyi (strain CBDB1) GN=cbdbA67 PE=3 SV=1	1.3434	1.06565	0.952788	1.29798	0.048183	0.446776	0.110802	0.00656866	Genetic information processing
Q3ZXX0	cbdbA964	Uncharacterized protein OS=Dehalococcoides mccartyi (strain CBDB1) GN=cbdbA964 PE=4 SV=1	Id.	1.28	0.968531	Id.		0.394124	0.428941
Q3ZXG6	cbdbA775	S-adenosylmethionine:tRNA ribosyltransferase-isomerase OS=Dehalococcoides mccartyi (strain CBDB1) GN=queA PE=3 SV=1	Id.	1.00119	Id.	n.d.		0.2292			Translation
Q3ZW09	cbdbA1620	Radical SAM/B12 binding domain protein OS=Dehalococcoides mccartyi (strain CBDB1) GN=cbdbA1620 PE=4 SV=1	Id.	Id.	0.908581	Id.			0.281843
Q3ZZR0	cbdbA513	DnaD OS=Dehalococcoides mccartyi (strain CBDB1) GN=cbdbA513 PE=4 SV=1	n.d.	1.19405	1.5042	Id.		0.219439	0.210104
Q3ZZG6	cbdbA387	Uncharacterized protein OS=Dehalococcoides mccartyi (strain CBDB1) GN=cbdbA387 PE=4 SV=1	n.d.	1.87592	1.20661	n.d.		0.0961044	0.0967276
Q3ZZ74	cbdbA1523	Hypothetical membrane protein OS=Dehalococcoides mccartyi (strain CBDB1) GN=cbdbA1523 PE=4 SV=1	n.d.	Id.	1.19451	Id.			0.353994
Q3ZY62	cbdbA1074	Uncharacterized protein OS=Dehalococcoides mccartyi (strain CBDB1) GN=cbdbA1074 PE=4 SV=1	n.d.	1.02602	0.779679	Id.		0.0800569	0.147954
Q3ZWQ8	cbdbA193	Formate dehydrogenase, membrane subunit OS=Dehalococcoides mccartyi (strain CBDB1) GN=OmeB PE=4 SV=1	1.72117	2.27888	1.81603	2.2614	0.0653272	0.571836	0.0450459	0.586726
Q3ZYK4	cbdbA1252	Uncharacterized protein OS=Dehalococcoides mccartyi (strain CBDB1) GN=cbdbA1252 PE=4 SV=1	2.2347	1.81265	1.66519	1.77099	0.121363	0.285205	0.290729	0.438276
Q3ZZX3	cbdbA1725	Metallo-beta-lactamase family protein OS=Dehalococcoides mccartyi (strain CBDB1) GN=cbdbA1725 PE=4 SV=1	1.34137	1.45404	1.24569	Id.	0.168064	0.476439	0.139987
Q3ZZV1	cbdbA523	DNA-binding protein OS=Dehalococcoides mccartyi (strain CBDB1) GN=cbdbA523 PE=4 SV=1	Id.	1.66035	1.30608	1.92339		0.275878	0.458409	0.278064	Transcription
Q3ZVZ2	cbdbA1583	Transcriptional regulator, MarR family OS=Dehalococcoides mccartyi (strain CBDB1) GN=rdhR PE=4 SV=1	n.d.	1.3803	1.30589	Id.		0.0593264	0.297201
Q3ZZT0	cbdbA485	ABC transporter, permease protein OS=Dehalococcoides mccartyi (strain CBDB1) GN=cbdbA485 PE=4 SV=1	Id.	1.54932	1.58861	Id.		0.0576037	0.0703463		Membrane transport
Q3ZWX5	cbdbA559	Uncharacterized protein OS=Dehalococcoides mccartyi (strain CBDB1) GN=cbdbA559 PE=4 SV=1	n.d.	1.4372	1.47837	Id.		0.131773	0.0755428
Q3ZWT7	cbdbA222	Serine protease inhibitor family protein OS=Dehalococcoides mccartyi (strain CBDB1) GN=cbdbA222 PE=3 SV=1	n.d.	1.30146	Id.	Id.		0.148363
Q3ZZE1	cbdbA361	PolyA polymerase family protein OS=Dehalococcoides mccartyi (strain CBDB1) GN=cbdbA361 PE=3 SV=1	n.d.	0.899228	Id.	n.d.		0.0744196			Translation
Q3ZZX4	cbdbA1724	Putative sodium exchanger OS=Dehalococcoides mccartyi (strain CBDB1) GN=cbdbA1724 PE=4 SV=1	n.d.	Id.	1.04319	n.d.			0.0460851		Cellular processes and signaling
Q3ZWK9	cbdbA137	Transcriptional regulator, TetR family OS=Dehalococcoides mccartyi (strain CBDB1) GN=cbdbA137 PE=4 SV=1	n.d.	0.93855	1.5176	Id.		0.308054	0.0386563
Q3ZVU2	cbdbA1534	Transcriptional regulator, MarR family,probable OS=Dehalococcoides mccartyi (strain CBDB1) GN=rdhR PE=4 SV=1	2.19003	1.53223	Id.	1.85644	0.488038	0.876762		0.669844
Q3ZXD1	cbdbA762	Metallo-beta-lactamase family protein OS=Dehalococcoides mccartyi (strain CBDB1) GN=cbdbA762 PE=4 SV=1	Id.	1.59926	Id.	Id.		0.0468181
Q3ZYK0	cbdbB27	Conserved domain protein OS=Dehalococcoides mccartyi (strain CBDB1) GN=cbdbA1255.1 PE=4 SV=1	1.85705	2.27819	1.86516	1.954	0.0724964	0.751175	0.620651	0.260759
Q3ZYT5	cbdbA1322	Endoribonuclease YbeY OS=Dehalococcoides mccartyi (strain CBDB1) GN=ybeY PE=3 SV=1	n.d.	1.70064	1.46542	Id.		0.245851	0.127948		Translation
Q3ZW17	cbdbA1611	Transcriptional regulator, MerR family OS=Dehalococcoides mccartyi (strain CBDB1) GN=cbdbA1611 PE=4 SV=1	n.d.	Id.	1.55344	n.d.			0.00928759
Q3ZXJ9	cbdbA789	ABC transporter, ATP-binding protein OS=Dehalococcoides mccartyi (strain CBDB1) GN=cbdbA789 PE=3 SV=1	n.d.	0.670018	1.11766	Id.		0.0209124	0.309807		Membrane transport
Q3ZVU6	cbdbA1531	Uncharacterized protein OS=Dehalococcoides mccartyi (strain CBDB1) GN=cbdbA1531 PE=4 SV=1	1.15789	Id.	1.10137	Id.	0.22417		0.495538
Q3ZXK3	cbdbA842	Hydrogenase, EchA subunit OS=Dehalococcoides mccartyi (strain CBDB1) GN=echA PE=4 SV=1	n.d.	1.55517	1.42417	Id.		0.0231342	0.0981952		Metabolism
Q3ZVV8	cbdbA1567.1	Uncharacterized protein OS=Dehalococcoides mccartyi (strain CBDB1) GN=cbdbA1567.1 PE=4 SV=1	n.d.	2.32963	2.27736	n.d.		0.247785	0.006137
Q3ZWT0	cbdbA232	Uncharacterized protein OS=Dehalococcoides mccartyi (strain CBDB1) GN=cbdbA232 PE=4 SV=1	n.d.	1.95092	1.61939	n.d.		0.0686892	0.47908
Q3ZZF3	cbdbA347	Thiamine-monophosphate kinase OS=Dehalococcoides mccartyi (strain CBDB1) GN=thiL PE=3 SV=1	n.d.	Id.	1.22592	Id.			0.0811284		Metabolism of cofactors and vitamins
Q3ZXG3	cbdbA778	Uncharacterized protein OS=Dehalococcoides mccartyi (strain CBDB1) GN=cbdbA778 PE=4 SV=1	1.95774	2.44674	2.31732	1.6988	0.414194	0.0571007	0.0647897	0.0929657
Q3ZZ31	cbdbA1479	SsrA-binding protein OS=Dehalococcoides mccartyi (strain CBDB1) GN=smpB PE=3 SV=1	n.d.	0.995973	0.951215	n.d.		0.201438	0.348305		Genetic information processing;
Q3ZYT9	cbdbA1373	Putative transcriptional regulator, MerR family OS=Dehalococcoides mccartyi (strain CBDB1) GN=cbdbA1373 PE=4 SV=1	Id.	1.06524	0.879122	n.d.		0.00107689	0.188025		Transcription
Q3ZXF2	cbdbA736	Uncharacterized protein OS=Dehalococcoides mccartyi (strain CBDB1) GN=cbdbA736 PE=4 SV=1	n.d.	0.396093	0.834634	n.d.		0.408165	0.335827
Q3ZY86	cbdbA1100	Conserved domain protein OS=Dehalococcoides mccartyi (strain CBDB1) GN=cbdbA1100 PE=4 SV=1	n.d.	n.d.	1.91112	Id.			0.192662
Q3ZWP7	cbdbA207	Glutaredoxin family protein OS=Dehalococcoides mccartyi (strain CBDB1) GN=cbdbA207 PE=4 SV=1	1.83818	Id.	1.05048	Id.	0.114151		0.0582788
Q3ZWJ2	cbdbA127	Probable endonuclease OS=Dehalococcoides mccartyi (strain CBDB1) GN=cbdbA127 PE=4 SV=1	n.d.	0.958695	0.987538	n.d.		0.01649	0.241845
Q3ZY74	cbdbA1088	Iron-sulfur cluster-binding protein OS=Dehalococcoides mccartyi (strain CBDB1) GN=cbdbA1088 PE=4 SV=1	n.d.	0.909247	Id.	Id.		0.100572
Q3ZZE5	cbdbA356	4-diphosphocytidyl-2-C-methyl-D-erythritol kinase OS=Dehalococcoides mccartyi (strain CBDB1) GN=ispE PE=3 SV=1	n.d.	0.836462	Id.	n.d.		0.0642525			Metabolism of terpenoids and polyketides
Q3ZX24	cbdbA613	Conserved domain protein OS=Dehalococcoides mccartyi (strain CBDB1) GN=cbdbA613 PE=4 SV=1	n.d.	Id.	Id.	n.d.					Poorly characterized
Q3ZZK6	cbdbA398	Holliday junction ATP-dependent DNA helicase RuvA OS=Dehalococcoides mccartyi (strain CBDB1) GN=ruvA PE=3 SV=1	1.68677	1.66741	1.97154	1.79599	0.260527	0.223212	0.0399992	0.267702	Replication and repair
Q3ZZP4	cbdbA468	tRNA pseudouridine synthase A OS=Dehalococcoides mccartyi (strain CBDB1) GN=truA PE=3 SV=1	n.d.	1.06799	1.11925	Id.		0.0466729	0.182806		Translation
Q3ZZ63	cbdbA1493	DNA-binding response regulator OS=Dehalococcoides mccartyi (strain CBDB1) GN=rdhD PE=4 SV=1	Id.	0.963888	n.d.	n.d.		0.00976388			Cellular community - prokaryotes; Signal transduction
Q3ZXK7	cbdbA838	ABC transporter, permease protein OS=Dehalococcoides mccartyi (strain CBDB1) GN=cbdbA838 PE=4 SV=1	Id.	1.50891	Id.	Id.		0.236605			Membrane transport
Q3ZWL6	cbdbA128	Putative Ni/Fe hydrogenase maturation protease OS=Dehalococcoides mccartyi (strain CBDB1) GN=hoxM PE=4 SV=1	n.d.	1.38372	1.139	Id.		0.143753	0.378602		Enzyme families
Q3ZY64	cbdbA1072	Uncharacterized protein OS=Dehalococcoides mccartyi (strain CBDB1) GN=cbdbA1072 PE=4 SV=1	1.36164	1.48268	Id.	1.19066	0.275973	0.271159		0.499291	Poorly characterized
Q3ZW08	cbdbA1621	Major facilitator family transporter OS=Dehalococcoides mccartyi (strain CBDB1) GN=cbdbA1621 PE=4 SV=1	1.49766	1.39133	1.38468	1.15757	0.0467764	0.0499355	0.161128	0.198475
Q3ZYE9	cbdbA1198	Uncharacterized protein OS=Dehalococcoides mccartyi (strain CBDB1) GN=cbdbA1198 PE=4 SV=1	1.80162	2.46594	2.61892	2.2604	0.0660587	0.34894	0.0472402	0.313584
Q3ZYJ4	cbdbA1264	Acetyltransferase, GNAT family OS=Dehalococcoides mccartyi (strain CBDB1) GN=cbdbA1264 PE=4 SV=1	n.d.	1.16361	1.2956	Id.		0.0719842	0.00592461
Q3ZZA6	cbdbA279	tRNA (guanine-N(1)-)-methyltransferase OS=Dehalococcoides mccartyi (strain CBDB1) GN=trmD PE=3 SV=1	1.53975	1.34043	1.51528	n.d.	0.296725	0.659842	0.0239518		Translation
Q3ZZ25	cbdbA1486	Uncharacterized protein OS=Dehalococcoides mccartyi (strain CBDB1) GN=cbdbA1486 PE=4 SV=1	n.d.	Id.	1.05621	n.d.			0.187861
Q3ZZV9	cbdbA1716	Putative ABC-transporter, permease component OS=Dehalococcoides mccartyi (strain CBDB1) GN=cbdbA1716 PE=4 SV=1	1.62164	0.964599	n.d.	Id.	0.206715	0.592304			Membrane transport
Q3ZXM6	cbdbA870	Uncharacterized protein OS=Dehalococcoides mccartyi (strain CBDB1) GN=cbdbA870 PE=4 SV=1	n.d.	1.49468	Id.	n.d.		0.00864147			Poorly characterized
Q3ZZK3	cbdbA401	Holo-[acyl-carrier-protein] synthase OS=Dehalococcoides mccartyi (strain CBDB1) GN=acpS PE=3 SV=1	Id.	1.32562	Id.	Id.		0.120901			Metabolism of cofactors and vitamins
Q3ZYW3	cbdbA1400	Hydrogenase assembly chaperone HypC OS=Dehalococcoides mccartyi (strain CBDB1) GN=hypC PE=4 SV=1	n.d.	2.02649	1.61765	Id.		0.0379281	0.837763		Genetic information processing
Q3ZWL2	cbdbA133	ABC transporter, permease protein OS=Dehalococcoides mccartyi (strain CBDB1) GN=cbdbA133 PE=4 SV=1	n.d.	1.33951	1.40813	0.973745		0.0330611	0.144169	0.115483	Membrane transport
Q3ZYM8	cbdbA1279	Uncharacterized protein OS=Dehalococcoides mccartyi (strain CBDB1) GN=cbdbA1279 PE=4 SV=1	n.d.	Id.	1.81711	Id.			0.0392622
Q3ZYQ4	cbdbA1305	Putative type II secretion system protein OS=Dehalococcoides mccartyi (strain CBDB1) GN=cbdbA1305 PE=4 SV=1	n.d.	1.81344	1.736	Id.		0.345836	0.218451
Q3ZXV1	cbdbA937	Acetyltransferase, GNAT family OS=Dehalococcoides mccartyi (strain CBDB1) GN=cbdbA937 PE=4 SV=1	Id.	1.17511	n.d.	Id.		0.51232
Q3ZW38	cbdbB43	Iron-sulfur cluster-binding protein OS=Dehalococcoides mccartyi (strain CBDB1) GN=cbdbA1646.1 PE=4 SV=1	n.d.	1.2564	n.d.	n.d.		0.125283
Q3ZYE5	cbdbA1172	NADPH-dependent FMN reductase OS=Dehalococcoides mccartyi (strain CBDB1) GN=cbdbA1172 PE=4 SV=1	n.d.	1.2787	1.33543	Id.		0.235909	0.088869
Q3ZY68	cbdbA1067	Cobalamin biosynthesis protein CobD OS=Dehalococcoides mccartyi (strain CBDB1) GN=cobD PE=3 SV=1	n.d.	Id.	Id.	Id.					Metabolism of cofactors and vitamins
Q3ZYC0	cbdbA1140	Fumarylacetoacetate hydrolase family protein OS=Dehalococcoides mccartyi (strain CBDB1) GN=cbdbA1140 PE=4 SV=1	1.14037	0.932295	0.817388	n.d.	0.285792	0.0984372	0.0122197
Q3ZWK5	cbdbA142	Uncharacterized protein OS=Dehalococcoides mccartyi (strain CBDB1) GN=cbdbA142 PE=4 SV=1	n.d.	n.d.	1.35206	Id.			0.153401
Q3ZXE2	cbdbA748	Metallopeptidase, M50 family OS=Dehalococcoides mccartyi (strain CBDB1) GN=cbdbA748 PE=4 SV=1	Id.	1.36167	Id.	Id.		0.0830713
Q3ZYX4	cbdbA1386	Phosphoglycerate mutase family protein OS=Dehalococcoides mccartyi (strain CBDB1) GN=cbdbA1386 PE=4 SV=1	n.d.	1.09328	1.2252	Id.		0.0458313	0.0333885
Q3ZZ16	cbdbA1442	Anthranilate synthase component II OS=Dehalococcoides mccartyi (strain CBDB1) GN=trpG PE=4 SV=1	n.d.	1.64461	1.57267	n.d.		0.309365	0.362362		Amino acid metabolism; Biosynthesis of other secondary metabolites; Cellular community - prokaryotes
Q3ZZA8	cbdbA277	Primosomal protein N OS=Dehalococcoides mccartyi (strain CBDB1) GN=priA PE=4 SV=1	n.d.	n.d.	1.01123	n.d.			0.290026		Replication and repair
Q3ZZ90	cbdbA299	Uncharacterized protein OS=Dehalococcoides mccartyi (strain CBDB1) GN=cbdbA299 PE=4 SV=1	n.d.	Id.	Id.	Id.
Q3ZZ68	cbdbA1488	Methyltransferase OS=Dehalococcoides mccartyi (strain CBDB1) GN=cbdbA1488 PE=4 SV=1	n.d.	0.787098	0.757236	Id.		0.351583	0.34065		Replication and repair; Transport and catabolism
Q3ZXB9	cbdbA722	Putative hypoxanthine phosphoribosyl transferase with additional GAF motif OS=Dehalococcoides mccartyi (strain CBDB1) GN=hpt PE=4 SV=1	Id.	0.931643	1.3627	n.d.		0.349455	0.317496		Nucleotide metabolism; Xenobiotics biodegradation and metabolism
Q3ZYI3	cbdbA1215	Uncharacterized protein OS=Dehalococcoides mccartyi (strain CBDB1) GN=cbdbA1215 PE=4 SV=1	n.d.	1.26195	Id.	n.d.		0.158658
Q3ZXU5	cbdbA945	tRNA pseudouridine synthase B OS=Dehalococcoides mccartyi (strain CBDB1) GN=truB PE=3 SV=1	1.35285	1.2758	0.952611	Id.	0.543045	0.755118	0.017321		Translation
Q3ZWT3	cbdbA228	Uncharacterized protein OS=Dehalococcoides mccartyi (strain CBDB1) GN=cbdbA228 PE=4 SV=1	n.d.	1.542	1.01892	n.d.		0.790019	0.380421		Poorly characterized
Q3ZW11	cbdbA1618	Putative reductive dehalogenase OS=Dehalococcoides mccartyi (strain CBDB1) GN=rdhA PE=4 SV=1	n.d.	n.d.	1.45039	Id.			0.132215
Q3ZXK0	cbdbA818	Uncharacterized protein OS=Dehalococcoides mccartyi (strain CBDB1) GN=cbdbA818 PE=4 SV=1	n.d.	1.6116	1.1605	Id.		0.0910515	0.588633
Q3ZXS7	cbdbA915	Smr domain protein OS=Dehalococcoides mccartyi (strain CBDB1) GN=cbdbA915 PE=4 SV=1	n.d.	1.39074	Id.	Id.		0.000138701
Q3ZXE0	cbdbA750	Ribosomal RNA small subunit methyltransferase G OS=Dehalococcoides mccartyi (strain CBDB1) GN=rsmG PE=3 SV=1	n.d.	0.921842	n.d.	Id.		0.0073058			Replication and repair; Translation
Q3ZWU0	cbdbA217	UPF0251 protein cbdbA217 OS=Dehalococcoides mccartyi (strain CBDB1) GN=cbdbA217 PE=3 SV=1	n.d.	n.d.	1.44639	n.d.			0.133359
Q3ZXN9	cbdbA856	Membrane protein, MmpL domain OS=Dehalococcoides mccartyi (strain CBDB1) GN=cbdbA856 PE=4 SV=1	n.d.	n.d.	0.857785	Id.			0.578634		Poorly characterized
Q3ZYJ5	cbdbA1263	Putative iron-sulfur flavoprotein OS=Dehalococcoides mccartyi (strain CBDB1) GN=cbdbA1263 PE=4 SV=1	n.d.	1.66446	n.d.	n.d.		1.15386
Q3ZW70	cbdbA1696	Dihydropteroate synthase OS=Dehalococcoides mccartyi (strain CBDB1) GN=folP PE=4 SV=1	n.d.	n.d.	1.02606	Id.			0.167182		Metabolism of cofactors and vitamins
Q3ZZB4	cbdbA331	Ribosomal RNA small subunit methyltransferase I OS=Dehalococcoides mccartyi (strain CBDB1) GN=rsmI PE=3 SV=1	1.4589	1.11103	0.980302	Id.	0.286689	0.110341	0.188993		Translation
Q3ZZ05	cbdbA1456	Transcriptional regulator, MarR family OS=Dehalococcoides mccartyi (strain CBDB1) GN=rdhR PE=4 SV=1	n.d.	1.52178	n.d.	n.d.		0.0944208
Q3ZYN8	cbdbA1266	Uncharacterized protein OS=Dehalococcoides mccartyi (strain CBDB1) GN=cbdbA1266 PE=4 SV=1	n.d.	n.d.	Id.	n.d.
Q3ZVX5	cbdbA1602	Response regulator OS=Dehalococcoides mccartyi (strain CBDB1) GN=rdhD PE=4 SV=1	n.d.	Id.	n.d.	Id.					Signal transduction
Q3ZYE2	cbdbA1143	Non-canonical purine NTP pyrophosphatase OS=Dehalococcoides mccartyi (strain CBDB1) GN=cbdbA1143 PE=3 SV=1	n.d.	1.18366	0.818071	n.d.		0.169615	0.539306		Nucleotide metabolism
Q3ZX38	cbdbA599	Uncharacterized protein OS=Dehalococcoides mccartyi (strain CBDB1) GN=cbdbA599 PE=4 SV=1	n.d.	1.29392	1.34406	n.d.		0.0138101	0.128124
Q3ZXH0	cbdbA770	Hypoxanthine phosphoribosyltransferase OS=Dehalococcoides mccartyi (strain CBDB1) GN=hpt PE=4 SV=1	n.d.	Id.	1.20759	n.d.			0.426541		Nucleotide metabolism; Xenobiotics biodegradation and metabolism
Q3ZY03	cbdbA1002	Uncharacterized protein OS=Dehalococcoides mccartyi (strain CBDB1) GN=cbdbA1002 PE=4 SV=1	n.d.	0.633205	n.d.	n.d.		0.139628			Poorly characterized
Q3ZYR4	cbdbA1349	Rhodanese-like domain protein OS=Dehalococcoides mccartyi (strain CBDB1) GN=cbdbA1349 PE=4 SV=1	n.d.	Id.	0.845464	n.d.			0.329008
Q3ZXY7	cbdbA998	Acylphosphatase OS=Dehalococcoides mccartyi (strain CBDB1) GN=acyP PE=3 SV=1	n.d.	Id.	Id.	n.d.					Carbohydrate metabolism; Xenobiotics biodegradation and metabolism
Q3ZWY7	cbdbA542	Endonuclease V OS=Dehalococcoides mccartyi (strain CBDB1) GN=nfi PE=3 SV=1	n.d.	0.41663	n.d.	n.d.		0.96263			Replication and repair
Q3ZWA8	cbdbA17	Putative lipoprotein OS=Dehalococcoides mccartyi (strain CBDB1) GN=cbdbA17 PE=4 SV=1	Id.	Id.	n.d.	n.d.
Q3ZWG9	cbdbA123	Uncharacterized protein OS=Dehalococcoides mccartyi (strain CBDB1) GN=cbdbA123 PE=4 SV=1	n.d.	n.d.	1.60005	Id.			0.565889
Q3ZZK2	cbdbA403	Putative [Fe] hydrogenase, HymA subunit OS=Dehalococcoides mccartyi (strain CBDB1) GN=cbdbA403 PE=4 SV=1	n.d.	n.d.	Id.	n.d.					Energy metabolism
Q3ZYX3	cbdbA1387	Peptidase, M48 family OS=Dehalococcoides mccartyi (strain CBDB1) GN=cbdbA1387 PE=3 SV=1	n.d.	Id.	1.27234	n.d.			0.0612682		Enzyme families; Metabolism of terpenoids and polyketides; Transport and catabolism
Q3ZX85	cbdbA662	Uncharacterized protein OS=Dehalococcoides mccartyi (strain CBDB1) GN=cbdbA662 PE=4 SV=1	n.d.	n.d.	1.04501	Id.			0.50733
Q3ZY78	cbdbA1109	Uncharacterized protein OS=Dehalococcoides mccartyi (strain CBDB1) GN=cbdbA1109 PE=4 SV=1	n.d.	n.d.	Id.	n.d.
Q3ZWW8	cbdbA566	Uncharacterized protein OS=Dehalococcoides mccartyi (strain CBDB1) GN=cbdbA566 PE=4 SV=1	n.d.	1.97187	1.96685	Id.		0.892078	0.363809
Q3ZZG2	cbdbA391	Putative uracil-DNA glycosylase OS=Dehalococcoides mccartyi (strain CBDB1) GN=cbdbA391 PE=4 SV=1	n.d.	1.13622	n.d.	1.13869		0.533322		0.0540259	Replication and repair
Q3ZXI9	cbdbA802	Probable nitroreductase family protein OS=Dehalococcoides mccartyi (strain CBDB1) GN=cbdbA802 PE=4 SV=1	n.d.	n.d.	Id.	n.d.
Q3ZZ71	cbdbA1527	Uncharacterized protein OS=Dehalococcoides mccartyi (strain CBDB1) GN=cbdbA1527 PE=4 SV=1	n.d.	n.d.	Id.	n.d.
Q3ZWD2	cbdbA52	SAM-dependent methyltransferase UbiE/COQ5 family OS=Dehalococcoides mccartyi (strain CBDB1) GN=cbdbA52 PE=4 SV=1	n.d.	Id.	1.03332	Id.			0.115634		Metabolism of cofactors and vitamins
Q3ZY04	cbdbA1032	DNA-binding response regulator OS=Dehalococcoides mccartyi (strain CBDB1) GN=cbdbA1032 PE=4 SV=1	n.d.	n.d.	Id.	Id.
Q3ZYP3	cbdbA1317	Uncharacterized protein OS=Dehalococcoides mccartyi (strain CBDB1) GN=cbdbA1317 PE=4 SV=1	n.d.	0.194399	n.d.	Id.		0.257495
Q3ZZH3	cbdbA378	Uncharacterized protein OS=Dehalococcoides mccartyi (strain CBDB1) GN=cbdbA378 PE=4 SV=1	n.d.	0.861299	Id.	n.d.		0.135277			Poorly characterized
Q3ZXL1	cbdbA833	Uncharacterized protein OS=Dehalococcoides mccartyi (strain CBDB1) GN=cbdbA833 PE=4 SV=1	n.d.	1.34962	1.33478	n.d.		0.205322	0.156851		Replication and repair
Q3ZZD6	cbdbA367	Uncharacterized protein OS=Dehalococcoides mccartyi (strain CBDB1) GN=cbdbA367 PE=4 SV=1	n.d.	1.93024	1.4596	Id.		0.0653068	0.266477
Q3ZY56	cbdbA1081	Transcriptional regulator, Fur family OS=Dehalococcoides mccartyi (strain CBDB1) GN=cbdbA1081 PE=4 SV=1	n.d.	Id.	Id.	n.d.					Transcription
Q3ZWA7	cbdbA18	Putative folylpolyglutamate synthetase OS=Dehalococcoides mccartyi (strain CBDB1) GN=folC PE=3 SV=1	Id.	Id.	1.3088	Id.			0.146104		Metabolism of cofactors and vitamins
Q3ZXP0	cbdbA855	Transcriptional regulator, MarR family OS=Dehalococcoides mccartyi (strain CBDB1) GN=rdhR PE=4 SV=1	n.d.	1.0404	Id.	n.d.		0.0402846
Q3ZW46	cbdbA1665	Uncharacterized protein OS=Dehalococcoides mccartyi (strain CBDB1) GN=cbdbA1665 PE=4 SV=1	Id.	1.0848	Id.	Id.		0.243982
Q3ZYI1	cbdbA1220	Serine protease, DegP OS=Dehalococcoides mccartyi (strain CBDB1) GN=cbdbA1220 PE=4 SV=1	Id.	1.11874	n.d.	Id.		0.0131315
Q3ZWY4	cbdbA546	DNA repair protein, RadC family OS=Dehalococcoides mccartyi (strain CBDB1) GN=cbdbA546 PE=3 SV=1	Id.	1.35327	Id.	n.d.		0.0390859			Genetic information processing
Q3ZWI4	cbdbB7	Uncharacterized protein OS=Dehalococcoides mccartyi (strain CBDB1) GN=cbdbA103.1 PE=4 SV=1	n.d.	Id.	Id.	n.d.
Q3ZXR9	cbdbA876	Proton-translocating NADH-quinone oxidoreductase, C subunit OS=Dehalococcoides mccartyi (strain CBDB1) GN=nuoC PE=4 SV=1	n.d.	1.38317	1.06614	1.216		0.30761	0.104474	0.116577	Energy metabolism
Q3ZZ32	cbdbA1478	Transcriptional regulator, Fur family OS=Dehalococcoides mccartyi (strain CBDB1) GN=cbdbA1478 PE=4 SV=1	n.d.	1.43856	1.43239	n.d.		0.15633	0.0430333		Transcription
Q3ZZE6	cbdbA355	Ribosomal RNA small subunit methyltransferase A OS=Dehalococcoides mccartyi (strain CBDB1) GN=rsmA PE=3 SV=1	n.d.	Id.	n.d.	n.d.					Translation
Q3ZZ86	cbdbA1512	Sensor histidine kinase OS=Dehalococcoides mccartyi (strain CBDB1) GN=cbdbA1512 PE=4 SV=1	n.d.	Id.	1.27568	Id.			0.0137836
Q3ZYK5	cbdbA1251	Conserved domain protein OS=Dehalococcoides mccartyi (strain CBDB1) GN=cbdbA1251 PE=4 SV=1	Id.	Id.	Id.	Id.
Q3ZXE8	cbdbA740	Conserved membrane protein OS=Dehalococcoides mccartyi (strain CBDB1) GN=cbdbA740 PE=4 SV=1	Id.	1.50981	1.88486	Id.		0.200272	0.224808
Q3ZYU7	cbdbA1365	Conserved domain protein OS=Dehalococcoides mccartyi (strain CBDB1) GN=cbdbA1365 PE=4 SV=1	n.d.	1.28784	Id.	Id.		0.0342285
Q3ZWK8	cbdbA138	DJ-1 family protein OS=Dehalococcoides mccartyi (strain CBDB1) GN=cbdbA138 PE=4 SV=1	n.d.	Id.	Id.	n.d.					Enzyme families
Q3ZW77	cbdbA1707	Uncharacterized protein OS=Dehalococcoides mccartyi (strain CBDB1) GN=cbdbA1707 PE=4 SV=1	n.d.	1.6562	1.38032	Id.		0.103403	0.320559
Q3ZY16	cbdbA1017	Ribonuclease P protein component OS=Dehalococcoides mccartyi (strain CBDB1) GN=rnpA PE=3 SV=1	n.d.	0.912495	1.19491	n.d.		0.547301	0.185521		Translation
Q3ZVX4	cbdbA1604	Conserved hypothetical membrane protein OS=Dehalococcoides mccartyi (strain CBDB1) GN=cbdbA1604 PE=4 SV=1	Id.	Id.	Id.	Id.
Q3ZXU9	cbdbA940	CDP-alcohol phosphatidyltransferase family protein OS=Dehalococcoides mccartyi (strain CBDB1) GN=cbdbA940 PE=3 SV=1	n.d.	Id.	1.17177	n.d.			0.577348		Lipid metabolism
Q3ZXF4	cbdbA734	Hypothetical membrane protein OS=Dehalococcoides mccartyi (strain CBDB1) GN=cbdbA734 PE=4 SV=1	n.d.	n.d.	1.71038	Id.			0.0480444
Q3ZX74	cbdbA675	Putative DNA processing protein DprA OS=Dehalococcoides mccartyi (strain CBDB1) GN=cbdbA675 PE=4 SV=1	n.d.	Id.	n.d.	n.d.					Genetic information processing;
Q3ZZC5	cbdbA316	Isoprenyl transferase OS=Dehalococcoides mccartyi (strain CBDB1) GN=uppS PE=3 SV=1	n.d.	1.04492	Id.	n.d.		0.0653865			Metabolism of terpenoids and polyketides
Q3ZX16	cbdbA626	Putative cyclase OS=Dehalococcoides mccartyi (strain CBDB1) GN=cbdbA626 PE=4 SV=1	n.d.	n.d.	Id.	Id.					Amino acid metabolism; Carbohydrate metabolism
Q3ZW79	cbdbA1705	Glycerol-3-phosphate acyltransferase 4 OS=Dehalococcoides mccartyi (strain CBDB1) GN=plsY4 PE=3 SV=1	n.d.	1.85196	1.73548	n.d.		0.0700802	0.104219		Lipid metabolism
Q3ZYD7	cbdbA1149	Uncharacterized protein OS=Dehalococcoides mccartyi (strain CBDB1) GN=cbdbA1149 PE=4 SV=1	n.d.	1.24836	1.52264	Id.		0.285231	0.438723
Q3ZYP1	cbdbA1319	Radical SAM domain protein OS=Dehalococcoides mccartyi (strain CBDB1) GN=cbdbA1319 PE=4 SV=1	n.d.	1.20752	Id.	n.d.		0.00738604			Genetic information processing
Q3ZXK5	cbdbA840	Oxygen-independent coproporphyrinogen III oxidase OS=Dehalococcoides mccartyi (strain CBDB1) GN=cbdbA840 PE=4 SV=1	n.d.	Id.	n.d.	Id.
Q3ZVU7	cbdbA1553	Transcriptional regulator, MarR family OS=Dehalococcoides mccartyi (strain CBDB1) GN=rdhR PE=4 SV=1	2.06494	1.9225	n.d.	Id.	0.107634	0.26336
Q3ZWP3	cbdbA213	LmbE-like family protein OS=Dehalococcoides mccartyi (strain CBDB1) GN=cbdbA213 PE=4 SV=1	n.d.	n.d.	1.4549	Id.			0.516711
Q3ZZS7	cbdbA489	Uncharacterized protein OS=Dehalococcoides mccartyi (strain CBDB1) GN=cbdbA489 PE=4 SV=1	Id.	1.41832	n.d.	n.d.		0.0914951
Q3ZZ36	cbdbA1472	Probable flavodoxin OS=Dehalococcoides mccartyi (strain CBDB1) GN=cbdbA1472 PE=4 SV=1	n.d.	Id.	1.36209	n.d.			0.276487
Q3ZVY6	cbdbA1589	DNA-binding response regulator OS=Dehalococcoides mccartyi (strain CBDB1) GN=rdhD PE=4 SV=1	n.d.	Id.	0.837707	n.d.			0.34476
Q3ZYY5	cbdbA1430	Hypothetical periplasmic protein OS=Dehalococcoides mccartyi (strain CBDB1) GN=cbdbA1430 PE=4 SV=1	n.d.	1.29757	1.33295	Id.		0.0927937	0.0843732
Q3ZZ87	cbdbA1511	DNA-binding response regulator OS=Dehalococcoides mccartyi (strain CBDB1) GN=rdhD PE=4 SV=1	n.d.	0.769322	0.752411	n.d.		0.0280485	0.251073
Q3ZYM0	cbdbA1290	ABC transporter, permease protein OS=Dehalococcoides mccartyi (strain CBDB1) GN=cbdbA1290 PE=4 SV=1	n.d.	n.d.	1.60965	n.d.			0.338266
Q3ZYJ2	cbdbA1238	Major facilitator family transporter OS=Dehalococcoides mccartyi (strain CBDB1) GN=cbdbA1238 PE=4 SV=1	n.d.	Id.	1.59922	Id.			0.155896
Q3ZYC7	cbdbA1163	Peptide methionine sulfoxide reductase MsrB OS=Dehalococcoides mccartyi (strain CBDB1) GN=msrB PE=4 SV=1	n.d.	n.d.	n.d.	Id.					Genetic information processing
Q3ZXW8	cbdbA966	Transcriptional regulator, ArsR family OS=Dehalococcoides mccartyi (strain CBDB1) GN=cbdbA966 PE=4 SV=1	n.d.	n.d.	0.742311	Id.			0.0875926		Transcription
Q3ZXS1	cbdbA874	NADH-quinone oxidoreductase subunit A OS=Dehalococcoides mccartyi (strain CBDB1) GN=nuoA PE=3 SV=1	n.d.	1.61682	0.793627	Id.		0.0140213	0.507464		Energy metabolism
Q3ZW13	cbdbA1616	Transcriptional regulator, MarR family OS=Dehalococcoides mccartyi (strain CBDB1) GN=rdhR PE=4 SV=1	n.d.	0.90868	n.d.	n.d.		0.26941
Q3ZWP4	cbdbA212	Probable glycosyltransferase OS=Dehalococcoides mccartyi (strain CBDB1) GN=cbdbA212 PE=4 SV=1	n.d.	Id.	1.38769	Id.			0.45328
Q3ZXS4	cbdbA919	tRNA modification enzyme, MiaB family OS=Dehalococcoides mccartyi (strain CBDB1) GN=cbdbA919 PE=4 SV=1	n.d.	0.738892	n.d.	n.d.		0.0337655			Translation
Q3ZWV0	cbdbA264	Acetyltransferase, GNAT family OS=Dehalococcoides mccartyi (strain CBDB1) GN=rimL PE=4 SV=1	n.d.	1.09976	0.8527	n.d.		0.186948	0.225402
Q3ZX29	cbdbA617	Transcriptional regulator, Fur family OS=Dehalococcoides mccartyi (strain CBDB1) GN=cbdbA617 PE=4 SV=1	n.d.	0.85995	Id.	n.d.		0.589552			Transcription
Q3ZZW2	cbdbA1740	LexA repressor OS=Dehalococcoides mccartyi (strain CBDB1) GN=lexA PE=3 SV=1	n.d.	n.d.	0.929701	Id.			0.228423		Enzyme families; Replication and repair
Q3ZYR3	cbdbA1350	Uncharacterized protein OS=Dehalococcoides mccartyi (strain CBDB1) GN=cbdbA1350 PE=4 SV=1	n.d.	Id.	Id.	n.d.
Q3ZZ13	cbdbA1447	N-(5'-phosphoribosyl)anthranilate isomerase OS=Dehalococcoides mccartyi (strain CBDB1) GN=trpF PE=3 SV=1	n.d.	0.938724	Id.	n.d.		0.077371			Amino acid metabolism
Q3ZXF1	cbdbA737	Uncharacterized protein OS=Dehalococcoides mccartyi (strain CBDB1) GN=cbdbA737 PE=4 SV=1	Id.	n.d.	Id.	n.d.
Q3ZWE7	cbdbA91	Sensor histidine kinase OS=Dehalococcoides mccartyi (strain CBDB1) GN=rdhC PE=4 SV=1	n.d.	Id.	Id.	Id.
Q3ZXQ0	cbdbA898	Branched-chain amino acid ABC transporter,permease protein OS=Dehalococcoides mccartyi (strain CBDB1) GN=cbdbA898 PE=4 SV=1	1.87665	1.65528	1.84348	Id.	0.0583454	0.508845	0.386936		Cellular community - prokaryotes; Membrane transport
Q3ZXF8	cbdbA783	Major facilitator family transporter OS=Dehalococcoides mccartyi (strain CBDB1) GN=cbdbA783 PE=4 SV=1	n.d.	Id.	1.10593	n.d.			0.481252
Q3ZXK2	cbdbA843	Hydrogenase, EchB subunit OS=Dehalococcoides mccartyi (strain CBDB1) GN=echB PE=3 SV=1	Id.	2.03992	1.63516	2.14922		0.178344	0.402434	0.045268
Q3ZZE9	cbdbA352	Putative 1,4-dihydroxy-2-naphthoateoctaprenyltransferase OS=Dehalococcoides mccartyi (strain CBDB1) GN=menA PE=4 SV=1	Id.	0.789291	Id.	n.d.		0.159428			Metabolism of cofactors and vitamins; Metabolism of terpenoids and polyketides
Q3ZX72	cbdbA678	Putative antiporter GerN OS=Dehalococcoides mccartyi (strain CBDB1) GN=gerN PE=4 SV=1	n.d.	n.d.	Id.	n.d.
Q3ZWX7	cbdbA557	DNA repair protein RecO OS=Dehalococcoides mccartyi (strain CBDB1) GN=recO PE=3 SV=1	n.d.	n.d.	Id.	Id.					Replication and repair
Q3ZYI0	cbdbA1223	Transcriptional regulator, MerR family OS=Dehalococcoides mccartyi (strain CBDB1) GN=cbdbA1223 PE=4 SV=1	n.d.	0.710058	Id.	Id.		0.338989
Q3ZW21	cbdbA1607	Conserved hypothetical membrane protein OS=Dehalococcoides mccartyi (strain CBDB1) GN=cbdbA1607 PE=4 SV=1	n.d.	1.01122	n.d.	n.d.		0.258994			Poorly characterized
Q3ZXF7	cbdbA784	Uncharacterized protein OS=Dehalococcoides mccartyi (strain CBDB1) GN=cbdbA784 PE=4 SV=1	n.d.	Id.	0.736734	n.d.			0.00813979
Q3ZVV9	cbdbA1567	Probable regulatory protein, LuxR domain OS=Dehalococcoides mccartyi (strain CBDB1) GN=rdhD PE=4 SV=1	n.d.	Id.	n.d.	n.d.
Q3ZWI9	cbdbA100	DNA-binding response regulator, LuxR family OS=Dehalococcoides mccartyi (strain CBDB1) GN=rdhD PE=4 SV=1	n.d.	Id.	Id.	n.d.
Q3ZXA1	cbdbA693	Uncharacterized protein OS=Dehalococcoides mccartyi (strain CBDB1) GN=cbdbA693 PE=4 SV=1	n.d.	1.78315	n.d.	Id.		0.136749
Q3ZYQ3	cbdbA1306	Uncharacterized protein OS=Dehalococcoides mccartyi (strain CBDB1) GN=cbdbA1306 PE=4 SV=1	n.d.	1.8709	1.90928	Id.		0.0174575	0.151935
Q3ZVY7	cbdbA1588	Putative reductive dehalogenase OS=Dehalococcoides mccartyi (strain CBDB1) GN=rdhA PE=4 SV=1	n.d.	n.d.	Id.	n.d.
Q3ZW43	cbdbA1640	Uncharacterized protein OS=Dehalococcoides mccartyi (strain CBDB1) GN=cbdbA1640 PE=4 SV=1	n.d.	n.d.	0.839593	Id.			0.0910043
Q3ZYQ5	cbdbA1304	Type II secretion system protein, GspI OS=Dehalococcoides mccartyi (strain CBDB1) GN=cbdbA1304 PE=4 SV=1	Id.	Id.	n.d.	Id.
Q3ZW51	cbdbA1690	Putative membrane bound regulatory protein,CprC OS=Dehalococcoides mccartyi (strain CBDB1) GN=cbdbA1690 PE=4 SV=1	2.10566	Id.	Id.	n.d.	0.00331013
Q3ZYD5	cbdbA1151	Uncharacterized protein OS=Dehalococcoides mccartyi (strain CBDB1) GN=cbdbA1151 PE=4 SV=1	Id.	n.d.	1.05407	n.d.			0.125837
Q3ZXN8	cbdbA857	Putative DNA-binding protein OS=Dehalococcoides mccartyi (strain CBDB1) GN=cbdbA857 PE=4 SV=1	n.d.	1.27194	n.d.	n.d.		0.451054
Q3ZY15	cbdbB22	50S ribosomal protein L34 OS=Dehalococcoides mccartyi (strain CBDB1) GN=rpmH PE=3 SV=1	1.50405	Id.	Id.	1.68129	0.291864			0.31227	Translation
Q3ZXR7	cbdbA879	NADH-quinone oxidoreductase subunit H OS=Dehalococcoides mccartyi (strain CBDB1) GN=nuoH PE=3 SV=1	n.d.	Id.	Id.	n.d.					Energy metabolism
Q3ZW23	cbdbA1664	Transcriptional regulator, TetR family OS=Dehalococcoides mccartyi (strain CBDB1) GN=cbdbA1664 PE=4 SV=1	Id.	1.31744	1.05943	n.d.		0.051345	0.140991
Q3ZX56	cbdbA638	Cobalamin biosynthesis protein CobD OS=Dehalococcoides mccartyi (strain CBDB1) GN=cobD PE=3 SV=1	n.d.	n.d.	Id.	n.d.					Metabolism of cofactors and vitamins
Q3ZYW6	cbdbA1395	Probable hydrogenase nickel incorporation protein HypA OS=Dehalococcoides mccartyi (strain CBDB1) GN=hypA PE=3 SV=1	n.d.	Id.	n.d.	n.d.					Folding, sorting and degradation
Q3ZXL4	cbdbA830	Conserved domain protein OS=Dehalococcoides mccartyi (strain CBDB1) GN=cbdbA830 PE=4 SV=1	n.d.	1.08098	1.49423	Id.		0.0477367	0.242367
Q3ZYC5	cbdbA1165	TfoX domain protein OS=Dehalococcoides mccartyi (strain CBDB1) GN=cbdbA1165 PE=4 SV=1	n.d.	Id.	1.52962	n.d.			0.135293		Cellular processes and signaling
Q3ZXF9	cbdbA782	Pantothenate synthetase OS=Dehalococcoides mccartyi (strain CBDB1) GN=panC PE=3 SV=1	n.d.	Id.	Id.	n.d.					Metabolism of cofactors and vitamins; Metabolism of other amino acids
Q3ZXU6	cbdbA944	Uncharacterized protein OS=Dehalococcoides mccartyi (strain CBDB1) GN=cbdbA944 PE=4 SV=1	Id.	2.64	3.2696	Id.		0.0740956	0.231551
Q3ZWI0	cbdbA107	Putative zinc protease OS=Dehalococcoides mccartyi (strain CBDB1) GN=cbdbA107 PE=4 SV=1	n.d.	Id.	n.d.	n.d.					Poorly characterized
Q3ZY21	cbdbA1011	Serine protease, DegP OS=Dehalococcoides mccartyi (strain CBDB1) GN=cbdbA1011 PE=4 SV=1	n.d.	0.59341	n.d.	n.d.		0.178885			Drug resistance; Enzyme families; Folding, sorting and degradation; Signal transduction
Q3ZXV8	cbdbA929	Uncharacterized protein OS=Dehalococcoides mccartyi (strain CBDB1) GN=cbdbA929 PE=4 SV=1	n.d.	n.d.	n.d.	n.d.					Poorly characterized
Q3ZWL1	cbdbA134	ABC transporter, permease protein OS=Dehalococcoides mccartyi (strain CBDB1) GN=cbdbA134 PE=4 SV=1	n.d.	1.49711	1.31317	Id.		0.00455483	0.01158		Membrane transport
Q3ZY22	cbdbA1009	Serine protease, DegP OS=Dehalococcoides mccartyi (strain CBDB1) GN=cbdbA1009 PE=4 SV=1	n.d.	Id.	2.15635	Id.			0.171963
Q3ZYC8	cbdbA1161	Peptide methionine sulfoxide reductase MsrA OS=Dehalococcoides mccartyi (strain CBDB1) GN=msrA PE=3 SV=1	n.d.	n.d.	Id.	n.d.					Genetic information processing
Q3ZW27	cbdbA1659	Hydrogenase, HycC subunit OS=Dehalococcoides mccartyi (strain CBDB1) GN=hycC PE=4 SV=1	n.d.	Id.	n.d.	Id.					Metabolism
Q3ZYU6	cbdbA1366	Uncharacterized protein OS=Dehalococcoides mccartyi (strain CBDB1) GN=cbdbA1366 PE=4 SV=1	Id.	1.27997	n.d.	n.d.		0.132633			Poorly characterized
Q3ZXS0	cbdbA875	NADH-quinone oxidoreductase subunit B OS=Dehalococcoides mccartyi (strain CBDB1) GN=nuoB PE=3 SV=1	n.d.	Id.	Id.	n.d.					Energy metabolism
Q3ZYG6	cbdbA1176	Uncharacterized protein OS=Dehalococcoides mccartyi (strain CBDB1) GN=cbdbA1176 PE=4 SV=1	n.d.	Id.	n.d.	n.d.
Q3ZW01	cbdbA1629	Sensor histidine kinase OS=Dehalococcoides mccartyi (strain CBDB1) GN=rdhC PE=4 SV=1	n.d.	Id.	Id.	n.d.
Q3ZYA8	cbdbA1128	Release factor glutamine methyltransferase OS=Dehalococcoides mccartyi (strain CBDB1) GN=prmC PE=3 SV=1	n.d.	1.06686	0.951409	n.d.		0.171157	0.160576		Translation
Q3ZYH5	cbdbA1230	UPF0235 protein cbdbA1230 OS=Dehalococcoides mccartyi (strain CBDB1) GN=cbdbA1230 PE=3 SV=1	n.d.	n.d.	Id.	n.d.					Poorly characterized
Q3ZX64	cbdbA661	Uncharacterized protein OS=Dehalococcoides mccartyi (strain CBDB1) GN=cbdbA661 PE=4 SV=1	Id.	n.d.	n.d.	n.d.
Q3ZXP9	cbdbA899	Branched-chain amino acid ABC transporter,permease protein OS=Dehalococcoides mccartyi (strain CBDB1) GN=cbdbA899 PE=4 SV=1	n.d.	n.d.	1.34471	n.d.			0.105409		Cellular community - prokaryotes; Membrane transport
Q3ZYM2	cbdbA1288	DNA-binding protein OS=Dehalococcoides mccartyi (strain CBDB1) GN=cbdbA1288 PE=4 SV=1	n.d.	Id.	n.d.	n.d.					Transcription
Q3ZWP6	cbdbA208	Putative ferredoxin-thioredoxin reductase,catalyticsubunit OS=Dehalococcoides mccartyi (strain CBDB1) GN=cbdbA208 PE=4 SV=1	n.d.	n.d.	1.02716	n.d.			0.07886
Q3ZYX7	cbdbA1383	Uncharacterized protein OS=Dehalococcoides mccartyi (strain CBDB1) GN=cbdbA1383 PE=4 SV=1	n.d.	n.d.	Id.	n.d.
Q3ZZH5	cbdbA376	Conserved hypothetical membrane protein OS=Dehalococcoides mccartyi (strain CBDB1) GN=cbdbA376 PE=4 SV=1	n.d.	n.d.	n.d.	n.d.					Poorly characterized
Q3ZW42	cbdbA1641	Preprotein translocase, SecG subunit OS=Dehalococcoides mccartyi (strain CBDB1) GN=secG PE=4 SV=1	n.d.	n.d.	n.d.	n.d.					Cellular community - prokaryotes; Folding, sorting and degradation; Membrane transport
Q3ZXR1	cbdbA885	NADH-quinone oxidoreductase subunit N OS=Dehalococcoides mccartyi (strain CBDB1) GN=nuoN PE=3 SV=1	n.d.	n.d.	1.30722	n.d.			0.756614		Energy metabolism
Q3ZWT2	cbdbA229	Uncharacterized protein OS=Dehalococcoides mccartyi (strain CBDB1) GN=cbdbA229 PE=4 SV=1	n.d.	n.d.	Id.	Id.
Q3ZWZ0	cbdbA598	Hydrogenase maturation protease OS=Dehalococcoides mccartyi (strain CBDB1) GN=cbdbA598 PE=4 SV=1	n.d.	Id.	0.584099	n.d.			0.093495		Energy metabolism
Q3ZWA4	cbdbA23	D-aminoacyl-tRNA deacylase OS=Dehalococcoides mccartyi (strain CBDB1) GN=dtd PE=3 SV=1	n.d.	Id.	n.d.	n.d.					Translation
Q3ZWB7	cbdbA39	Cation efflux family protein OS=Dehalococcoides mccartyi (strain CBDB1) GN=cbdbA39 PE=4 SV=1	n.d.	Id.	Id.	n.d.					Membrane transport
Q3ZW28	cbdbA1658	Hydrogenase, HycD subunit OS=Dehalococcoides mccartyi (strain CBDB1) GN=hycD PE=4 SV=1	n.d.	Id.	n.d.	n.d.
Q3ZY38	cbdbA1046	Maf-like protein cbdbA1046 OS=Dehalococcoides mccartyi (strain CBDB1) GN=cbdbA1046 PE=3 SV=1	n.d.	1.18547	n.d.	n.d.		0.00601859			Cellular processes and signaling
Q3ZW32	cbdbA1652	Hydrogenase, group 4, HycG subunit OS=Dehalococcoides mccartyi (strain CBDB1) GN=hycG PE=4 SV=1	Id.	Id.	n.d.	n.d.
Q3ZXZ3	cbdbA990	Uncharacterized protein OS=Dehalococcoides mccartyi (strain CBDB1) GN=cbdbA990 PE=4 SV=1	n.d.	n.d.	Id.	Id.
Q3ZVW0	cbdbA1566	Uncharacterized protein OS=Dehalococcoides mccartyi (strain CBDB1) GN=cbdbA1566 PE=4 SV=1	n.d.	0.987248	Id.	n.d.		0.0984015
Q3ZX18	cbdbA624	Uncharacterized protein OS=Dehalococcoides mccartyi (strain CBDB1) GN=cbdbA624 PE=4 SV=1	n.d.	n.d.	Id.	n.d.
Q3ZW78	cbdbA1706	Endonuclease III OS=Dehalococcoides mccartyi (strain CBDB1) GN=cbdbA1706 PE=3 SV=1	n.d.	n.d.	Id.	n.d.					Genetic information processing
Q3ZXD5	cbdbA757	UPF0102 protein cbdbA757 OS=Dehalococcoides mccartyi (strain CBDB1) GN=cbdbA757 PE=3 SV=1	n.d.	Id.	n.d.	n.d.					Genetic information processing
Q3ZZ44	cbdbA1462	Peptide ABC transporter, permease protein OS=Dehalococcoides mccartyi (strain CBDB1) GN=cbdbA1462 PE=3 SV=1	Id.	0.570288	n.d.	n.d.		0.61429			Cellular community - prokaryotes; Membrane transport
Q3ZWJ8	cbdbA150	Uncharacterized protein OS=Dehalococcoides mccartyi (strain CBDB1) GN=cbdbA150 PE=4 SV=1	n.d.	Id.	0.731503	n.d.			0.700599
Q3ZW60	cbdbA1679	Divalent cation tolerance protein CutA OS=Dehalococcoides mccartyi (strain CBDB1) GN=cutA PE=4 SV=1	n.d.	n.d.	Id.	n.d.					Cellular processes and signaling
Q3ZXG2	cbdbA779	Uncharacterized protein OS=Dehalococcoides mccartyi (strain CBDB1) GN=cbdbA779 PE=4 SV=1	n.d.	1.50361	1.68109	Id.		0.0512819	0.0676906
Q3ZYT1	cbdbA1327	Lipoprotein signal peptidase OS=Dehalococcoides mccartyi (strain CBDB1) GN=lspA PE=3 SV=1	n.d.	Id.	n.d.	n.d.					Enzyme families; Folding, sorting and degradation
Q3ZYS6	cbdbA1333	Auxin-responsive GH3 protein homolog OS=Dehalococcoides mccartyi (strain CBDB1) GN=cbdbA1333 PE=4 SV=1	n.d.	n.d.	n.d.	n.d.
Q3ZWS9	cbdbA235	DNA-binding response regulator OS=Dehalococcoides mccartyi (strain CBDB1) GN=rdhD PE=4 SV=1	n.d.	n.d.	n.d.	Id.
Q3ZWX8	cbdbA556	Uncharacterized protein OS=Dehalococcoides mccartyi (strain CBDB1) GN=cbdbA556 PE=4 SV=1	n.d.	n.d.	n.d.	n.d.
Q3ZYT7	cbdbA1375	Hypothetical membrane protein OS=Dehalococcoides mccartyi (strain CBDB1) GN=cbdbA1375 PE=4 SV=1	n.d.	n.d.	n.d.	n.d.
Q3ZXB2	cbdbA729	Uncharacterized protein OS=Dehalococcoides mccartyi (strain CBDB1) GN=cbdbA729 PE=4 SV=1	n.d.	n.d.	Id.	Id.
Q3ZXJ5	cbdbA795	ABC transporter, ATP-binding protein OS=Dehalococcoides mccartyi (strain CBDB1) GN=cbdbA795 PE=3 SV=1	n.d.	n.d.	n.d.	n.d.					Membrane transport
Q3ZYI4	cbdbA1213	Uncharacterized protein OS=Dehalococcoides mccartyi (strain CBDB1) GN=cbdbA1213 PE=4 SV=1	n.d.	2.03148	1.09842	n.d.		0.0206447	0.911516
Q3ZZ23	cbdbA1461	Peptide ABC transporter, permease protein OS=Dehalococcoides mccartyi (strain CBDB1) GN=cbdbA1461 PE=3 SV=1	n.d.	n.d.	0.76609	n.d.			0.160187		Cellular community - prokaryotes; Membrane transport
Q3ZYS9	cbdbA1330	Uncharacterized protein OS=Dehalococcoides mccartyi (strain CBDB1) GN=cbdbA1330 PE=4 SV=1	n.d.	n.d.	n.d.	n.d.
Q3ZZ39	cbdbA1469	Putative fluoride ion transporter CrcB OS=Dehalococcoides mccartyi (strain CBDB1) GN=crcB PE=3 SV=1	n.d.	1.65488	Id.	n.d.		0.0714884			Poorly characterized
Q3ZX76	cbdbA673	Tyrosine recombinase XerC OS=Dehalococcoides mccartyi (strain CBDB1) GN=xerC PE=3 SV=1	n.d.	n.d.	n.d.	n.d.
Q3ZWZ4	cbdbA594	Uncharacterized protein OS=Dehalococcoides mccartyi (strain CBDB1) GN=cbdbA594 PE=4 SV=1	n.d.	n.d.	Id.	n.d.
Q3ZYJ8	cbdbA1257	Uncharacterized protein OS=Dehalococcoides mccartyi (strain CBDB1) GN=cbdbA1257 PE=4 SV=1	n.d.	Id.	n.d.	n.d.
Q3ZYJ7	cbdbA1259	Uncharacterized protein OS=Dehalococcoides mccartyi (strain CBDB1) GN=cbdbA1259 PE=4 SV=1	n.d.	n.d.	Id.	Id.
Q3ZXR3	cbdbA883	Proton-translocating NADH-quinone oxidoreductase, L subunit OS=Dehalococcoides mccartyi (strain CBDB1) GN=cbdbA883 PE=4 SV=1	n.d.	Id.	n.d.	n.d.					Energy metabolism
Q3ZW40	cbdbA1644	Uncharacterized protein OS=Dehalococcoides mccartyi (strain CBDB1) GN=cbdbA1644 PE=4 SV=1	n.d.	n.d.	n.d.	n.d.
Q3ZYZ0	cbdbA1421	2'-5' RNA ligase family protein OS=Dehalococcoides mccartyi (strain CBDB1) GN=cbdbA1421 PE=4 SV=1	n.d.	n.d.	n.d.	n.d.					Translation
Q3ZWY2	cbdbA549	Uncharacterized protein OS=Dehalococcoides mccartyi (strain CBDB1) GN=cbdbA549 PE=4 SV=1	n.d.	Id.	n.d.	n.d.
Q3ZYP5	cbdbA1315	Uncharacterized protein OS=Dehalococcoides mccartyi (strain CBDB1) GN=cbdbA1315 PE=4 SV=1	n.d.	Id.	n.d.	n.d.
Q3ZXK9	cbdbA835	ABC transporter, permease protein OS=Dehalococcoides mccartyi (strain CBDB1) GN=cbdbA835 PE=4 SV=1	n.d.	Id.	n.d.	n.d.					Membrane transport
Q3ZXK8	cbdbA837	Uncharacterized protein OS=Dehalococcoides mccartyi (strain CBDB1) GN=cbdbA837 PE=4 SV=1	n.d.	Id.	Id.	n.d.
Q3ZXW1	cbdbA924	Glycerol-3-phosphate acyltransferase 2 OS=Dehalococcoides mccartyi (strain CBDB1) GN=plsY2 PE=3 SV=1	Id.	n.d.	n.d.	n.d.					Lipid metabolism
Q3ZYY3	cbdbA1433	Uncharacterized protein OS=Dehalococcoides mccartyi (strain CBDB1) GN=cbdbA1433 PE=4 SV=1	n.d.	Id.	n.d.	n.d.
Q3ZWB2	cbdbA12	DNA polymerase IV OS=Dehalococcoides mccartyi (strain CBDB1) GN=dinB PE=3 SV=1	n.d.	n.d.	Id.	n.d.					Replication and repair
Q3ZZ18	cbdbB30	Uncharacterized protein OS=Dehalococcoides mccartyi (strain CBDB1) GN=cbdbA1440.1 PE=4 SV=1	Id.	n.d.	n.d.	n.d.
Q3ZYV4	cbdbA1355	Glycerol-3-phosphate acyltransferase 3 OS=Dehalococcoides mccartyi (strain CBDB1) GN=plsY3 PE=3 SV=1	n.d.	Id.	n.d.	n.d.					Lipid metabolism
Q3ZW34	cbdbA1650	Uncharacterized protein OS=Dehalococcoides mccartyi (strain CBDB1) GN=cbdbA1650 PE=4 SV=1	n.d.	n.d.	n.d.	n.d.
		number of identified and quantified proteins:	733	1031	1031	928

## Sheet: B
														Identifications (High = identified)												MS1 areas
														Proteome												Proteome
														Found in Sample: [S10] F10: Sample	Found in Sample: [S9] F9: Sample	Found in Sample: [S8] F8: Sample	Found in Sample: [S13] F13: Sample	Found in Sample: [S12] F12: Sample	Found in Sample: [S11] F11: Sample	Found in Sample: [S20] F20: Sample	Found in Sample: [S19] F19: Sample	Found in Sample: [S18] F18: Sample	Found in Sample: [S7] F7: Sample	Found in Sample: [S6] F6: Sample	Found in Sample: [S5] F5: Sample	Area: F10: Sample	Area: F9: Sample	Area: F8: Sample	Area: F13: Sample	Area: F12: Sample	Area: F11: Sample	Area: F20: Sample	Area: F19: Sample	Area: F18: Sample	Area: F7: Sample	Area: F6: Sample	Area: F5: Sample
Master	Accession	Description	Contaminant	Exp. q-value	Sum PEP Score	Coverage	# Peptides	# PSMs	# Unique Peptides	# Protein Groups	# AAs	MW [kDa]	calc. pI	inoculum1	inoculum2	inoculum3	- TCB_1	- TCB_2	- TCB_3	exp_1	exp_2	exp_3	stat_1	stat_2	stat_3	inoculum1	inoculum2	inoculum3	- TCB_1	- TCB_2lag_2	- TCB_3	exp_1	exp_2	exp_3	stat_1	stat_2	stat_3
cbdbA727	Q3ZXB4	Uncharacterized protein OS=Dehalococcoides mccartyi (strain CBDB1) GN=cbdbA727 PE=4 SV=1	FALSE	0	1170.19	82	116	2648	116	1	843	84.9	5.62	High	High	High	High	High	High	High	High	High	High	High	High	4.61819e+07	5.584e+07	9.10709e+07	3.10118e+09	3.60657e+09	6.73666e+07	2.94221e+09	3.77103e+09	3.30818e+09	6.9182e+07	4.63174e+07	1.65087e+09
cbdbA1393	Q3ZYW8	60 kDa chaperonin OS=Dehalococcoides mccartyi (strain CBDB1) GN=groL PE=3 SV=1	FALSE	0	1131.89	97	85	5140	85	1	537	57.1	5.27	High	High	High	High	High	High	High	High	High	High	High	High	378553591	4.61447e+08	5.50333e+08	1.08857e+10	1.1354e+10	5.90893e+08	8.12637e+09	9.37353e+09	1.27298e+10	3.0348e+08	5.3471e+08	8.40178e+09
cbdbA587	Q3ZX00	DNA-directed RNA polymerase subunit beta' OS=Dehalococcoides mccartyi (strain CBDB1) GN=rpoC PE=3 SV=1	FALSE	0	1027.72	77	114	2019	114	1	1295	144.2	7.36	High	High	High	High	High	High	High	High	High	High	High	High	4.51433e+07	3.7071e+07	3.51438e+07	1.13398e+09	1.25608e+09	8.56889e+07	8.03366e+08	9.01768e+08	5.568e+08	1.99442e+07	4.04419e+07	3.63224e+08
cbdbA586	Q3ZX01	DNA-directed RNA polymerase subunit beta OS=Dehalococcoides mccartyi (strain CBDB1) GN=rpoB PE=3 SV=1	FALSE	0	945.274	70	109	2023	109	1	1273	141.4	5.31	High	High	High	High	High	High	High	High	High	High	High	High	8.87746e+07	8.69658e+07	5.91826e+07	1.28348e+09	1.26324e+09	1.14635e+08	9.4493e+08	1.05041e+09	7.83898e+08	1.62411e+07	6.62881e+07	338360581
cbdbA1077	Q3ZY60	Acetyl-CoA synthetase OS=Dehalococcoides mccartyi (strain CBDB1) GN=cbdbA1077 PE=4 SV=1	FALSE	0	866.738	74	78	2082	78	1	891	97.6	6.32	High	High	High	High	High	High	High	High	High	High	High	High	2.08198e+08	2.28773e+08	1.50486e+08	1.52242e+09	1.96743e+09	2.4418e+08	1.75884e+09	1.07291e+09	1.53549e+09	6.19928e+07	1.56752e+08	7.7969e+08
cbdbA388	Q3ZZG5	Protein translocase subunit SecA OS=Dehalococcoides mccartyi (strain CBDB1) GN=secA PE=3 SV=1	FALSE	0	744.07	73	83	1143	83	1	952	107	6.47	High	High	High	High	High	High	High	High	High	High	High	High	3.68495e+07	3.65118e+07	3.24713e+07	7.646e+08	913304067	4.97252e+07	497881276	3.84986e+08	3.84239e+08	2.30505e+07	1.76958e+07	2.52485e+08
cbdbA1358	Q3ZYV1	Chaperone protein DnaK OS=Dehalococcoides mccartyi (strain CBDB1) GN=dnaK PE=3 SV=1	FALSE	0	719.352	73	73	2525	73	1	636	68.5	5.17	High	High	High	High	High	High	High	High	High	High	High	High	5.46104e+08	5.14301e+08	6.72794e+08	2.91335e+09	4.4145e+09	7.04245e+08	3.13749e+09	2.81188e+09	4.24314e+09	3.45227e+08	3.73094e+08	2.31045e+09
cbdbA195	Q3ZWQ7	Formate dehydrogenase, major subunit OS=Dehalococcoides mccartyi (strain CBDB1) GN=fdnG PE=4 SV=1	FALSE	0	696.128	72	64	1941	64	1	993	105.7	6.51	High	High	High	High	High	High	High	High	High	High	High	High	2.28649e+08	3.25051e+08	3.73697e+08	3.11204e+09	2.9195e+09	4.10137e+08	2.59406e+09	2.89548e+09	3.97945e+09	3.28372e+08	4.72932e+08	9.04793e+08
cbdbA80	Q3ZWG0	Putative reductive dehalogenase OS=Dehalococcoides mccartyi (strain CBDB1) GN=rdhA PE=4 SV=1	FALSE	0	635.51	81	53	2794	53	1	496	56.4	6.13	High	High	High	High	High	High	High	High	High	High	High	High	3.85322e+09	3.21736e+09	1.46372e+08	7.76318e+09	6.93643e+09	3.8206e+09	5.3851e+09	5.0673e+09	774017845	5.1266e+08	2.26072e+09	5.79888e+09
cbdbA529	Q3ZZU6	Phosphoenolpyruvate synthase OS=Dehalococcoides mccartyi (strain CBDB1) GN=ppsA PE=3 SV=1	FALSE	0	584.411	60	58	1176	58	1	758	83.2	5.47	High	High	High	High	High	High	High	High	High	High	High	High	8.78771e+07	7.03933e+07	1.87571e+08	1280204886	1.35215e+09	1.11635e+08	8.54206e+08	7.3091e+08	1.20566e+09	1.02078e+08	1.94076e+08	2.89442e+08
cbdbA1374	Q3ZYT8	ATP-dependent Clp protease, ATP-binding subunit ClpC OS=Dehalococcoides mccartyi (strain CBDB1) GN=clpA PE=3 SV=1	FALSE	0	561.642	74	80	1131	80	1	812	91.6	5.76	High	High	High	High	High	High	High	High	High	High	High	High	1.07872e+08	1.16638e+08	4.9023e+07	5.31515e+08	6.10374e+08	1.63276e+08	4.54281e+08	3.74899e+08	7.74784e+08	4.35536e+07	1.2256e+08	2.00745e+08
cbdbA728	Q3ZXB3	Uncharacterized protein OS=Dehalococcoides mccartyi (strain CBDB1) GN=cbdbA728 PE=4 SV=1	FALSE	0	559.239	83	59	1306	59	1	468	48.1	5.52	High	High	High	High	High	High	High	High	High	High	High	High	4.56801e+07	2.599e+07	4.72713e+07	1.35127e+09	1.40452e+09	3.53294e+07	2086809960	1.3086e+09	1.86185e+09	3.27507e+06	1.53618e+07	6.5483e+08
cbdbA65	Q3ZWC3	Alanine--tRNA ligase OS=Dehalococcoides mccartyi (strain CBDB1) GN=alaS PE=3 SV=1	FALSE	0	546.933	61	63	948	63	1	871	96.5	6.19	High	High	High	High	High	High	High	High	High	High	High	High	7.14952e+07	3.73856e+07	7.47032e+07	5.21554e+08	3.44757e+08	9.07488e+07	2.82561e+08	2.7143e+08	3.77145e+08	1.33289e+07	8.2352e+07	1.52351e+08
cbdbA129	Q3ZWL5	Ni/Fe hydrogenase large subunit OS=Dehalococcoides mccartyi (strain CBDB1) GN=hupL PE=3 SV=1	FALSE	0	534.835	76	45	1671	45	1	526	58	6.1	High	High	High	High	High	High	High	High	High	High	High	High	4.25628e+08	4.05861e+08	2.68013e+08	2.06421e+09	2.69524e+09	6.33709e+08	1.76853e+09	1.51891e+09	2.39766e+09	2.4702e+08	2.44158e+08	1.10161e+09
cbdbA84	Q3ZWF5	Putative reductive dehalogenase OS=Dehalococcoides mccartyi (strain CBDB1) GN=rdhA PE=4 SV=1	FALSE	0	524.604	76	36	1674	36	1	488	54.1	6.47	High	High	High	High	High	High	High	High	High	High	High	High	1.57916e+09	9.78177e+08	1.17005e+09	5.73346e+09	5.56615e+09	1.85887e+09	6.33064e+09	3.02258e+09	7.21569e+09	8.74429e+07	7.33999e+08	3.33732e+09
cbdbA960	Q3ZXX3	Elongation factor Tu OS=Dehalococcoides mccartyi (strain CBDB1) GN=tuf PE=3 SV=1	FALSE	0	514.284	79	32	2654	32	1	400	43.9	6.25	High	High	High	High	High	High	High	High	High	High	High	High	1.13308e+09	1.05333e+09	8.90334e+08	6.65043e+09	6.88281e+09	2.3252e+09	4.28452e+09	4.79419e+09	5.76712e+09	1.77252e+08	1.28277e+09	2.73441e+09
cbdbA684	Q3ZX66	Putative [Fe] hydrogenase, HymB subunit OS=Dehalococcoides mccartyi (strain CBDB1) GN=hymB PE=4 SV=1	FALSE	0	510.391	83	56	1357	56	1	623	67.8	7.02	High	High	High	High	High	High	High	High	High	High	High	High	1.41605e+08	1.66512e+08	5.72421e+07	1.28004e+09	1.44773e+09	2.64232e+08	1.23582e+09	1.50304e+09	1.18109e+09	1.63997e+07	1.68353e+08	4.25805e+08
cbdbA1130	Q3ZYA7	Translation elongation factor G OS=Dehalococcoides mccartyi (strain CBDB1) GN=fusA PE=4 SV=1	FALSE	0	508.23	66	48	842	48	1	686	73.9	5.4	High	High	High	High	High	High	High	High	High	High	High	High	3.35911e+07	4.74233e+07	1.21939e+07	5.86572e+08	4.18428e+08	1.18532e+08	4.37998e+08	4.45442e+08	7.15677e+08	1.46363e+07	7.27729e+07	1.90151e+08
cbdbA437	Q3ZZM6	Elongation factor G OS=Dehalococcoides mccartyi (strain CBDB1) GN=fusA PE=3 SV=1	FALSE	0	505.515	80	59	968	59	1	693	76.5	5.44	High	High	High	High	High	High	High	High	High	High	High	High	7.09628e+07	9.16866e+07	7.40682e+07	1.28472e+09	1.14953e+09	1.31115e+08	9.3569e+08	9.00213e+08	1.22051e+09	5.80194e+07	1.11204e+08	4.35433e+08
cbdbA1728	Q3ZZX1	DNA gyrase subunit A OS=Dehalococcoides mccartyi (strain CBDB1) GN=gyrA PE=3 SV=1	FALSE	0	505.401	56	59	1004	59	1	809	89.4	6.23	High	High	High	High	High	High	High	High	High	High	High	High	4.91363e+07	2.95321e+07	5.73828e+07	7.99265e+08	7.3483e+08	7.27694e+07	6.24991e+08	6.74716e+08	5.34857e+08	8.33043e+06	5.89182e+07	1.99242e+08
cbdbA1187	Q3ZYF7	DAK2 domain protein OS=Dehalococcoides mccartyi (strain CBDB1) GN=cbdbA1187 PE=4 SV=1	FALSE	0	492.383	72	42	892	42	1	544	58.8	5.06	High	High	High	High	High	High	High	High	High	High	High	High	5.8523e+07	6.75218e+07	2.97876e+07	5.24832e+08	5.2999e+08	5.6685e+07	2.34524e+08	2.90302e+08	1.56533e+08	1.72476e+07	6.30933e+07	1.05996e+08
cbdbA70	Q3ZWB9	ATP-dependent Clp protease, ATP-binding subunit OS=Dehalococcoides mccartyi (strain CBDB1) GN=clpC PE=3 SV=1	FALSE	0	491.222	60	63	816	63	1	824	91.6	6.02	High	High	High	High	High	High	High	High	High	Not Found	High	High	7.48744e+07	2.45671e+07	1.08283e+07	5.62123e+08	7.10835e+08	1.21726e+08	4.56158e+08	3.33538e+08	1.65433e+08		1.45157e+07	1.56497e+08
cbdbA932	Q3ZXV6	Polyribonucleotide nucleotidyltransferase OS=Dehalococcoides mccartyi (strain CBDB1) GN=pnp PE=3 SV=1	FALSE	0	484.471	67	58	1213	58	1	720	78.3	5.49	High	High	High	High	High	High	High	High	High	High	High	High	5.59121e+07	7.70587e+07	8.24659e+07	1.55939e+09	1.68666e+09	6.6878e+07	1.18294e+09	1.06979e+09	1.37523e+09	5.69331e+07	3.61395e+07	5.72222e+08
cbdbA1142	Q3ZYE3	Uncharacterized protein OS=Dehalococcoides mccartyi (strain CBDB1) GN=cbdbA1142 PE=4 SV=1	FALSE	0	479.894	70	33	1483	33	1	365	40.3	6.47	High	High	High	High	High	High	High	High	High	High	High	High	1.45811e+08	1.73669e+08	2.65017e+08	2.5865e+09	2.42911e+09	1.82802e+08	2.00599e+09	2.79317e+09	2.37486e+09	1.74546e+08	1.85457e+08	9.05747e+08
cbdbA171	Q3ZWM9	Putative [Fe] hydrogenase, large subunit HymC OS=Dehalococcoides mccartyi (strain CBDB1) GN=hymC PE=4 SV=1	FALSE	0	467.93	72	49	905	49	1	573	62.6	6.89	High	High	High	High	High	High	High	High	High	High	High	High	4.18831e+07	5.52322e+07	3.42237e+07	9.98127e+08	1.15093e+09	6.58802e+07	7.70137e+08	815339169	4.94559e+08	1.45804e+07	7.32129e+07	2.48866e+08
cbdbA143	Q3ZWK4	Pyridine nucleotide-disulphide oxidoreductase family protein OS=Dehalococcoides mccartyi (strain CBDB1) GN=cbdbA143 PE=4 SV=1	FALSE	0	462.826	74	55	978	55	1	600	65	7.74	High	High	High	High	High	High	High	High	High	High	High	High	2.49388e+07	4.64434e+07	3.31517e+07	1.03217e+09	1.05053e+09	3.08863e+07	7.49802e+08	9.25882e+08	5.75624e+08	2.34279e+07	2.50594e+07	3.74753e+08
cbdbA1702	Q3ZW82	Ribonuclease Y OS=Dehalococcoides mccartyi (strain CBDB1) GN=rny PE=3 SV=1	FALSE	0	455.493	64	49	718	49	1	527	59.1	5.94	High	High	Not Found	High	High	High	High	High	High	Not Found	Not Found	High	1.0424e+07	8.53462e+06		6.54225e+08	8.22281e+08	1.20094e+07	5.30639e+08	5.19407e+08	2.70873e+08			1.96006e+08
cbdbA597	Q3ZWZ1	Hydrogenase, group 3, VhuA subunit OS=Dehalococcoides mccartyi (strain CBDB1) GN=cbdbA597 PE=3 SV=1	FALSE	0	451.5	71	47	1194	47	1	479	53.2	6.55	High	High	High	High	High	High	High	High	High	High	High	High	1.22604e+08	1.93019e+08	1.05905e+08	9.75214e+08	1.21561e+09	3.41762e+08	9.42053e+08	1.05892e+09	1.033e+09	8.07185e+07	1.79263e+08	5.63405e+08
cbdbA1024	Q3ZY09	Conserved domain protein OS=Dehalococcoides mccartyi (strain CBDB1) GN=cbdbA1024 PE=4 SV=1	FALSE	0	447.105	74	49	1009	49	1	441	48.5	5.14	High	High	High	High	High	High	High	High	High	High	High	High	3.5777e+07	1.07708e+07	5.18262e+07	9.74105e+08	1.26722e+09	4.00649e+07	6.7753e+08	7.05888e+08	9.54029e+08	2.43497e+07	3.75983e+07	4.36979e+08
cbdbA1008	Q3ZY23	Tryptophan synthase beta chain OS=Dehalococcoides mccartyi (strain CBDB1) GN=trpB PE=3 SV=1	FALSE	0	443.425	69	27	1506	27	1	454	50.2	6.73	High	High	High	High	High	High	High	High	High	High	High	High	8.51269e+08	5.47864e+08	1.838e+08	1558127411	1.91478e+09	1.31696e+09	1.82464e+09	1.73011e+09	2.25369e+09	1.18581e+08	4.14161e+08	1.48358e+09
cbdbA1568	Q3ZVV7	Glutamine synthetase OS=Dehalococcoides mccartyi (strain CBDB1) GN=glnA PE=3 SV=1	FALSE	0	441.829	74	42	1187	42	1	501	55.6	6.54	High	High	High	High	High	High	High	High	High	High	High	High	5.43079e+08	5.55294e+08	1.51657e+08	1.80639e+09	1.73727e+09	9.29168e+08	1.20762e+09	9.1801e+08	5.78357e+08	2.9802e+07	2.71522e+08	9.92155e+08
cbdbA664	Q3ZX83	Trigger factor OS=Dehalococcoides mccartyi (strain CBDB1) GN=tig PE=3 SV=1	FALSE	0	438.432	82	42	784	42	1	447	51	4.69	High	High	High	High	High	High	High	High	High	High	High	High	2.05965e+07	2.75549e+07	2.83108e+07	1.21594e+09	1.25054e+09	3.57893e+07	6.63536e+08	6.63022e+08	5.49246e+08	2.16685e+07	2.08976e+07	3.20152e+08
cbdbA202	Q3ZWQ1	Leucine--tRNA ligase OS=Dehalococcoides mccartyi (strain CBDB1) GN=leuS PE=3 SV=1	FALSE	0	436.978	55	53	635	53	1	813	92.9	6.77	High	High	High	High	High	High	High	High	High	High	High	High	3.11276e+07	5.34188e+07	3.96141e+07	1.61258e+08	2.13173e+08	5.35712e+07	1.61426e+08	1.96013e+08	1.69271e+08	2.8263e+07	3.80661e+07	9.60945e+07
cbdbA287	Q3ZZA0	Ribonucleotide reductase OS=Dehalococcoides mccartyi (strain CBDB1) GN=nrdA PE=4 SV=1	FALSE	0	432.144	61	51	890	49	1	761	83	7.23	High	High	High	High	High	High	High	High	High	Not Found	High	High	2.2522e+07	4.60954e+07	1.08205e+07	8.48371e+08	9.14023e+08	4.38817e+07	7.46997e+08	4.72753e+08	3.33764e+08		1.48326e+07	2.76895e+08
cbdbA308	Q3ZZD2	Phenylalanine--tRNA ligase beta subunit OS=Dehalococcoides mccartyi (strain CBDB1) GN=pheT PE=3 SV=1	FALSE	0	428.363	59	52	860	52	1	809	89.9	5.47	High	High	High	High	High	High	High	High	High	High	High	High	3.90784e+07	4.6091e+07	5.67324e+07	4.52975e+08	4.32819e+08	7.5694e+07	1.75623e+08	2.31302e+08	2.14394e+08	4.00871e+07	5.73126e+07	1.21559e+08
cbdbA310	Q3ZZD0	Proline--tRNA ligase OS=Dehalococcoides mccartyi (strain CBDB1) GN=proS PE=3 SV=1	FALSE	0	427.737	82	50	782	50	1	569	63	6	High	High	High	High	High	High	High	High	High	High	High	High	3.01533e+07	4.04508e+07	3.082e+07	5.04487e+08	6.27836e+08	2.57316e+07	3.48791e+08	4.86472e+08	4.88197e+08	2.51985e+07	3.48649e+07	2.26987e+08
cbdbA846	Q3ZXP7	Hydrogenase subunit HymB OS=Dehalococcoides mccartyi (strain CBDB1) GN=cbdbA846 PE=4 SV=1	FALSE	0	426.947	79	50	820	50	1	640	69.6	6.95	High	High	High	High	High	High	High	High	High	High	High	High	6.38376e+07	5.51028e+07	6.40174e+07	4.28337e+08	4.91803e+08	8.17619e+07	3.09681e+08	3.96282e+08	3.35876e+08	2.43485e+07	1.13465e+08	2.08996e+08
cbdbA568	Q3ZWW6	GTPase domain protein OS=Dehalococcoides mccartyi (strain CBDB1) GN=cbdbA568 PE=4 SV=1	FALSE	0	422.877	80	40	1040	40	1	392	43.8	8.34	High	High	High	High	High	High	High	High	High	High	High	High	1.85888e+08	3.1535e+08	2.40913e+08	2.40393e+09	3.00331e+09	3.00679e+08	1.54462e+09	1.84043e+09	1.35196e+09	1.40053e+08	3.80295e+08	7.65745e+08
cbdbA811	Q3ZXI2	Ketol-acid reductoisomerase OS=Dehalococcoides mccartyi (strain CBDB1) GN=ilvC PE=3 SV=1	FALSE	0	417.523	82	33	1531	33	1	332	36.4	5.29	High	High	High	High	High	High	High	High	High	High	High	High	2.43533e+08	2.44278e+08	2.12786e+08	2.10661e+09	2.91616e+09	5.28152e+08	1.16371e+09	1.80432e+09	3.83286e+09	6.86636e+07	2.75572e+08	1.04235e+09
cbdbA1118	Q3ZYB7	Carbamoyl-phosphate synthase, large subunit OS=Dehalococcoides mccartyi (strain CBDB1) GN=carB PE=3 SV=1	FALSE	0	413.955	54	53	658	53	1	1089	118.5	5.34	High	High	High	High	High	High	High	High	High	High	High	High	1.94077e+07	2.00749e+07	5.46848e+07	4.3211e+08	4.64584e+08	1.70474e+07	2.90194e+08	2.76535e+08	1.984e+08	8.6757e+06	2.11676e+07	9.7512e+07
cbdbA1381	Q3ZYX9	Bifunctional purine biosynthesis protein PurH OS=Dehalococcoides mccartyi (strain CBDB1) GN=purH PE=3 SV=1	FALSE	0	412.94	64	41	927	41	1	513	56.2	6.9	High	High	High	High	High	High	High	High	High	High	High	High	1.56402e+08	5.47571e+07	1.37753e+08	1.29003e+09	9.04681e+08	1.72431e+08	1.00598e+09	5.73035e+08	1.21739e+09	8.94279e+07	1.13192e+08	3.21309e+08
cbdbA949	Q3ZXU1	N utilization substance protein A OS=Dehalococcoides mccartyi (strain CBDB1) GN=nusA PE=3 SV=1	FALSE	0	409.481	71	55	784	55	1	491	53.7	8.18	High	High	High	High	High	High	High	High	High	High	High	High		2.81509e+07	1.57106e+07	6.03209e+08	6.58396e+08	1.6558e+07	4.88722e+08	5.3274e+08	5.12289e+08	5.50622e+06	2.14833e+07	2.71262e+08
cbdbA538	Q3ZZT7	ATP synthase subunit beta OS=Dehalococcoides mccartyi (strain CBDB1) GN=atpD PE=3 SV=1	FALSE	0	406.472	72	34	1392	34	1	464	50.7	5.08	High	High	High	High	High	High	High	High	High	High	High	High	1.22644e+08	1.53468e+08	1.59726e+08	3.88415e+09	4.21708e+09	2.27614e+08	1.59781e+09	1.84926e+09	3.68437e+09	5.4913e+07	8.42842e+07	1.28472e+09
cbdbA580	Q3ZX05	D-3-phosphoglycerate dehydrogenase OS=Dehalococcoides mccartyi (strain CBDB1) GN=serA PE=3 SV=1	FALSE	0	405.028	68	42	1178	42	1	526	56.5	6.64	High	High	High	High	High	High	High	High	High	High	High	High	2.35317e+08	2.70775e+08	1.97926e+08	1.20771e+09	1.5021e+09	2.35488e+08	7.19139e+08	7.31524e+08	8.96194e+08	6.67139e+07	2.44452e+08	511069096
cbdbA674	Q3ZX75	DNA topoisomerase 1 OS=Dehalococcoides mccartyi (strain CBDB1) GN=topA PE=3 SV=1	FALSE	0	401.665	68	53	736	53	1	703	79.8	9.03	High	High	High	High	High	High	High	High	High	High	High	High	5.0323e+07	5.34155e+07	5.09329e+07	6.71879e+08	6.24941e+08	1.07812e+08	3.79236e+08	4.64029e+08	3.9406e+08	3.81294e+07	1.10518e+08	1.53243e+08
cbdbA794	Q3ZXJ6	Iron-regulated ABC transporter, subunit SufB-related OS=Dehalococcoides mccartyi (strain CBDB1) GN=sufB PE=4 SV=1	FALSE	0	399.804	90	34	653	34	1	411	45.3	5.94	High	High	High	High	High	High	High	High	High	High	High	High	1.32414e+07	1.13207e+07	1.77177e+07	6.7798e+08	7.47126e+08	2.78297e+07	8.16232e+08	9.31965e+08	6.83031e+08	6.52297e+06	1.27295e+07	2.30506e+08
cbdbA808	Q3ZXI3	2-isopropylmalate synthase OS=Dehalococcoides mccartyi (strain CBDB1) GN=leuA PE=3 SV=1	FALSE	0	397.678	84	49	761	49	1	505	54.8	5.69	High	High	High	High	High	High	High	High	High	High	High	High	5.94592e+07	7.26306e+07	8.30732e+07	3.90377e+08	5.62718e+08	9.29591e+07	4.29245e+08	6.07398e+08	6.39931e+08	3.40325e+07	6.24218e+07	2.56526e+08
cbdbA943	Q3ZXU7	Myo-inositol-1-phosphate synthase family protein OS=Dehalococcoides mccartyi (strain CBDB1) GN=cbdbA943 PE=4 SV=1	FALSE	0	395.293	69	29	1120	29	1	370	41.1	7.66	High	High	High	High	High	High	High	High	High	High	High	High	2.03461e+08	1.11577e+08	9.99232e+07	3.07434e+09	3.94301e+09	1.61324e+08	1.26813e+09	2.65081e+09	3.02954e+09	1.13445e+08	1.2509e+08	1.15666e+09
cbdbA432	Q3ZZN0	Phospho-2-dehydro-3-deoxyheptonate aldolase OS=Dehalococcoides mccartyi (strain CBDB1) GN=aroF PE=4 SV=1	FALSE	0	394.843	69	34	1159	34	1	351	38.5	6.21	High	High	High	High	High	High	High	High	High	High	High	High	1.1039e+09	1.30779e+09	4.03999e+08	2.93545e+09	3.09305e+09	2.06489e+09	1.99853e+09	2.68088e+09	4.23951e+09	9.75671e+07	1.25109e+09	1.77169e+09
cbdbA1369	Q3ZYU3	Transcription termination factor Rho OS=Dehalococcoides mccartyi (strain CBDB1) GN=rho PE=3 SV=1	FALSE	0	394.037	76	46	960	46	1	424	47.5	7.96	High	High	High	High	High	High	High	High	High	High	High	High	9.3385e+07	1.25803e+08	8.65838e+07	6.91982e+08	4.84421e+08	1.86784e+08	4.52041e+08	4.70498e+08	4.71294e+08	4.60859e+07	9.01716e+07	2.06379e+08
cbdbA384	Q3ZZG9	Valine--tRNA ligase OS=Dehalococcoides mccartyi (strain CBDB1) GN=valS PE=3 SV=1	FALSE	0	389.909	57	49	609	49	1	880	100.1	5.87	High	High	High	High	High	High	High	High	High	Not Found	High	High	1.54673e+07	2.6188e+07	1.95078e+07	3.20282e+08	2.79834e+08	3.94078e+07	1.91689e+08	2.77235e+08	1.99243e+08		3.18078e+07	1.1913e+08
cbdbA4	Q3ZW87	DNA gyrase subunit B OS=Dehalococcoides mccartyi (strain CBDB1) GN=gyrB PE=3 SV=1	FALSE	0	387.529	66	43	672	43	1	642	71.2	7.09	High	High	High	High	High	High	High	High	High	High	High	High	6.48355e+07	9.71144e+07	2.52404e+07	7.34975e+08	7.26977e+08	1.18228e+08	5.39724e+08	5.62388e+08	4.6839e+08	6.37774e+06	4.31205e+07	1.93947e+08
cbdbA573	Q3ZX11	Enolase OS=Dehalococcoides mccartyi (strain CBDB1) GN=eno PE=3 SV=1	FALSE	0	383.404	89	35	729	35	1	428	46.2	6.28	High	High	High	High	High	High	High	High	High	High	High	High	3.72084e+07	3.86121e+07	7.67899e+07	7.21492e+08	8.37295e+08	9.17244e+07	7.57666e+08	4.75641e+08	9.7559e+08	4.24534e+07	6.63836e+07	1.88607e+08
cbdbA339	Q3ZZF9	ATP-dependent zinc metalloprotease FtsH OS=Dehalococcoides mccartyi (strain CBDB1) GN=ftsH PE=3 SV=1	FALSE	0	382.575	51	37	758	37	1	608	66.8	5.68	High	High	High	High	High	High	High	High	High	High	High	High	1.6483e+07	2.33736e+07	2.58305e+07	814799643	9.21965e+08	2.49248e+07	6.45567e+08	5.255e+08	4.33376e+08	1.63158e+07	1.26785e+07	2.15893e+08
cbdbA431	Q3ZZN1	3-dehydroquinate synthase OS=Dehalococcoides mccartyi (strain CBDB1) GN=aroB PE=3 SV=1	FALSE	0	380.586	77	32	937	32	1	359	39	6.74	High	High	High	High	High	High	High	High	High	High	High	High	2.13598e+08	1.04977e+08	1.38768e+08	2.1428e+09	2.11362e+09	2.51884e+08	2.25005e+09	2.52056e+09	2.76547e+09	6.13166e+07	1.28769e+08	1.29925e+09
cbdbA1126	Q3ZYB0	Acetyl-CoA synthetase OS=Dehalococcoides mccartyi (strain CBDB1) GN=acs PE=4 SV=1	FALSE	0	372.809	62	43	1051	43	1	652	73.1	6.47	High	High	High	High	High	High	High	High	High	High	High	High	1.75796e+08	2.63786e+08	1.65661e+08	1.36996e+09	1.54232e+09	4.7254e+08	8.92456e+08	1.12679e+09	1.33636e+09	5.61171e+07	3.81358e+08	4.75201e+08
cbdbA726	Q3ZXB5	Threonine--tRNA ligase OS=Dehalococcoides mccartyi (strain CBDB1) GN=thrS PE=3 SV=1	FALSE	0	371.482	68	44	656	44	1	582	67	6.35	High	High	High	High	High	High	High	High	High	High	High	High	3.70852e+07	6.94698e+07	1.52364e+07	4.27512e+08	4.30943e+08	2.49734e+07	5.57586e+08	2.96805e+08	4.86691e+08	11473548	1.12047e+07	1.87789e+08
cbdbA476	Q3ZZN7	S-adenosylmethionine synthase OS=Dehalococcoides mccartyi (strain CBDB1) GN=metK PE=3 SV=1	FALSE	0	361.958	75	38	1253	38	1	406	44.4	6.54	High	High	High	High	High	High	High	High	High	High	High	High	2.17182e+08	3.14161e+08	2.30163e+08	2.03223e+09	2.07966e+09	3.99635e+08	1.61568e+09	1.57053e+09	1.64861e+09	1.19233e+08	7.82512e+07	7.18606e+08
cbdbA131	Q3ZWL3	Putative Ni/Fe hydrogenase, iron-sulfur cluster-binding subunit OS=Dehalococcoides mccartyi (strain CBDB1) GN=cbdbA131 PE=4 SV=1	FALSE	0	355.78	83	28	987	28	1	267	30.4	6.21	High	High	High	High	High	High	High	High	High	High	High	High	1.37637e+08	6.57041e+07	2.54877e+08	1.48729e+09	1.90312e+09	1.75236e+08	9.15778e+08	1.3955e+09	1.86194e+09	1.82656e+08	1.44439e+08	7.46459e+08
cbdbA322	Q3ZZC1	30S ribosomal protein S2 OS=Dehalococcoides mccartyi (strain CBDB1) GN=rpsB PE=3 SV=1	FALSE	0	354.91	90	34	867	34	1	245	27.5	7.81	High	High	High	High	High	High	High	High	High	High	High	High	2.0714e+08	4.89152e+08	1.3597e+07	1.53616e+09	2.23559e+09	7.55909e+08	1.07117e+09	1.51935e+09	1.41763e+09	1.45308e+07	2.58294e+08	8.08974e+08
cbdbA821	Q3ZXM1	Adenylosuccinate lyase OS=Dehalococcoides mccartyi (strain CBDB1) GN=purB PE=3 SV=1	FALSE	0	352.15	72	45	464	45	1	451	51.1	6.95	High	High	High	High	High	High	High	High	High	High	High	High	1.72505e+07	1.84159e+07	1.8397e+07	2.76421e+08	4.64646e+08	2.7614e+07	3.03581e+08	2.68757e+08	2.64631e+08	1.23088e+07	2.47494e+07	1.24446e+08
cbdbA466	Q3ZZP6	DNA-directed RNA polymerase subunit alpha OS=Dehalococcoides mccartyi (strain CBDB1) GN=rpoA PE=3 SV=1	FALSE	0	348.426	74	37	892	37	1	330	36.5	4.83	High	High	High	High	High	High	High	High	High	High	High	High	1.11186e+08	1.64073e+08	1.06727e+08	1.45276e+09	1.61353e+09	1.4544e+08	1.04091e+09	9.78928e+08	7.90715e+08	5.47836e+07	1.42813e+08	4.36018e+08
cbdbA947	Q3ZXU3	Translation initiation factor IF-2 OS=Dehalococcoides mccartyi (strain CBDB1) GN=infB PE=3 SV=1	FALSE	0	345.049	57	41	478	41	1	593	64	6.15	High	High	High	High	High	High	High	High	High	High	High	High	1.81122e+07	2.17128e+07	3.38537e+07	2.19512e+08	1.87024e+08	1.77676e+07	2.02951e+08	1.97428e+08	2.23851e+08		1.27106e+07	1.11075e+08
cbdbA390	Q3ZZG3	Serine hydroxymethyltransferase OS=Dehalococcoides mccartyi (strain CBDB1) GN=glyA PE=3 SV=1	FALSE	0	336.781	65	31	770	31	1	415	45.2	7.59	High	High	High	High	High	High	High	High	High	High	High	High	2.44103e+07	3.80231e+07	1.10771e+07	1.09693e+09	9.65452e+08	3.53635e+07	5.44127e+08	5.25886e+08	8.97052e+08	7.01254e+07	2.81809e+07	3.30417e+08
cbdbA803	Q3ZXI8	2-isopropylmalate synthase OS=Dehalococcoides mccartyi (strain CBDB1) GN=cbdbA803 PE=3 SV=1	FALSE	0	336.346	60	41	590	41	1	533	58.6	5.97	High	High	High	High	High	High	High	High	High	High	High	High	4.43217e+07	6.4525e+07	3.70357e+07	6.97477e+08	8.09978e+08	7.54335e+07	6.02688e+08	5.19761e+08	7.22241e+08	2.73827e+07	4.13273e+07	2.79454e+08
cbdbA939	Q3ZXV0	Adenylosuccinate synthetase OS=Dehalococcoides mccartyi (strain CBDB1) GN=purA PE=3 SV=1	FALSE	0	334.877	76	35	630	35	1	423	46.3	6.15	High	High	High	High	High	High	High	High	High	High	High	High	1.22693e+08	1.08855e+08	2.89989e+07	4.20009e+08	6.24219e+08	1.75542e+08	3.1101e+08	2.21128e+08	3.32618e+08	1.18385e+07	1.28263e+08	2.04701e+08
cbdbA578	Q3ZX07	Uncharacterized protein OS=Dehalococcoides mccartyi (strain CBDB1) GN=cbdbA578 PE=4 SV=1	FALSE	0	334.441	70	40	721	40	1	442	50.6	7.66	High	High	High	High	High	High	High	High	High	High	High	High	8.73938e+07	7.24774e+07	1.17404e+08	8.44543e+08	1.01661e+09	9.32195e+07	5.8401e+08	8.11704e+08	7.35329e+08	1.20173e+08	1.02516e+08	3.68031e+08
cbdbA652	Q3ZX45	Carbon monoxide dehydrogenase, alpha subunit OS=Dehalococcoides mccartyi (strain CBDB1) GN=codH PE=4 SV=1	FALSE	0	333.971	67	39	789	39	1	733	80.1	5.17	High	High	High	High	High	High	High	High	High	High	High	High	6.15419e+07	6.24018e+07	4.03125e+07	4.89404e+08	5.08688e+08	1.22219e+08	3.8176e+08	5.22702e+08	6.89557e+08	2.0853e+07	7.79692e+07	2.30409e+08
cbdbA1520	Q3ZZ78	Uncharacterized protein OS=Dehalococcoides mccartyi (strain CBDB1) GN=cbdbA1520 PE=4 SV=1	FALSE	0	329.025	82	39	651	39	1	427	47.1	6.58	High	High	High	High	High	High	High	High	High	High	High	High	4.60351e+07	8.31947e+07	3.23506e+07	7.95731e+08	4.45347e+08	9.8836e+07	7.51932e+08	7.61712e+08	5.89921e+08	4.55862e+07	9.98291e+07	2.58199e+08
cbdbA536	Q3ZZT9	ATP synthase subunit alpha OS=Dehalococcoides mccartyi (strain CBDB1) GN=atpA PE=3 SV=1	FALSE	0	323.508	51	39	1064	39	1	503	54.1	6.62	High	High	High	High	High	High	High	High	High	High	High	High	1.04188e+08	9.7634e+07	7.92135e+07	3.62148e+09	3.33611e+09	1.82928e+08	2.37605e+09	2.08006e+09	2.24872e+09	1.00888e+08	2.3729e+08	1.01509e+09
cbdbA1392	Q3ZYW9	10 kDa chaperonin OS=Dehalococcoides mccartyi (strain CBDB1) GN=groS PE=3 SV=1	FALSE	0	321.331	93	21	1403	21	1	98	10.7	7.25	High	High	High	High	High	High	High	High	High	High	High	High	8.3075e+07	5.50551e+07	1.74302e+08	7.76567e+09	5.80175e+09	1.00553e+08	2.29636e+09	3.49355e+09	7.24424e+09	1.13731e+08	1.17608e+08	1.92926e+09
cbdbA106	Q3ZWI1	Restriction enzymes type I helicase subunit OS=Dehalococcoides mccartyi (strain CBDB1) GN=cbdbA106 PE=4 SV=1	FALSE	0	319.544	48	47	331	47	1	994	115.5	5.85	High	High	High	High	High	High	High	High	High	Not Found	High	High	8.83816e+06	9.74363e+06	3.46614e+06	1.28007e+08	1.32442e+08	2.38499e+07	9.38703e+07	6.22977e+07	9.16972e+07		9.96316e+06	3.2601e+07
cbdbA393	Q3ZZI4	DNA translocase FtsK OS=Dehalococcoides mccartyi (strain CBDB1) GN=ftsK PE=4 SV=1	FALSE	0	318.146	53	43	468	43	1	816	89	9.14	High	High	High	High	High	High	High	High	High	Not Found	High	High	1.05226e+07	1.50333e+07	1.90862e+07	3.28634e+08	3.70603e+08	4.70363e+07	2.55387e+08	2.00859e+08	1.57235e+08		2.31511e+07	8.7593e+07
cbdbA477	Q3ZZN6	Adenosylhomocysteinase OS=Dehalococcoides mccartyi (strain CBDB1) GN=ahcY PE=3 SV=1	FALSE	0	313.86	64	36	840	36	1	418	45.3	6.67	High	High	High	High	High	High	High	High	High	High	High	High	9.74198e+07	1.24559e+08	8.70867e+07	1.76167e+09	1.68546e+09	1.54349e+08	1.15784e+09	1.03521e+09	1.3099e+09	6.68321e+07	9.73005e+07	5.74673e+08
cbdbA442	Q3ZZM1	50S ribosomal protein L2 OS=Dehalococcoides mccartyi (strain CBDB1) GN=rplB PE=3 SV=1	FALSE	0	312.682	84	36	978	36	1	274	29.9	10.4	High	High	High	High	High	High	High	High	High	High	High	High	3.12264e+08	3.81656e+08	1.68079e+08	1.96029e+09	2.646e+09	5.78887e+08	1.37585e+09	1.58117e+09	2.09467e+09	1.34428e+08	4.02802e+08	7.25204e+08
cbdbA1050	Q3ZY35	Glutamine synthetase, type I OS=Dehalococcoides mccartyi (strain CBDB1) GN=glnA PE=3 SV=1	FALSE	0	312.273	70	35	695	35	1	443	50.3	5.76	High	High	High	High	High	High	High	High	High	High	High	High	1.53987e+08	2.12913e+08	1.47378e+07	4.85909e+08	5.6699e+08	9.23758e+07	3.3339e+08	5.72367e+08	5.57556e+08	1.30317e+07	1.21074e+08	2.88605e+08
cbdbA445	Q3ZZL8	30S ribosomal protein S3 OS=Dehalococcoides mccartyi (strain CBDB1) GN=rpsC PE=3 SV=1	FALSE	0	310.449	79	35	994	35	1	278	30.9	9.48	High	High	High	High	High	High	High	High	High	High	High	High	9.72831e+07	2.69954e+08	1.1197e+08	1.80514e+09	1.74588e+09	1.57824e+08	1.04488e+09	1.35572e+09	1.34654e+09	2.19543e+07	4.2863e+07	5.65644e+08
cbdbA1359	Q3ZYV0	Protein GrpE OS=Dehalococcoides mccartyi (strain CBDB1) GN=grpE PE=3 SV=1	FALSE	0	309.346	96	28	620	28	1	187	21	5.21	High	High	High	High	High	High	High	High	High	High	High	High	1.64495e+07	1.69493e+07	4.72064e+06	1.13046e+09	1.07994e+09	2.34515e+07	8.64045e+08	9.53499e+08	1.66722e+09		6.7144e+06	458577185
cbdbA1368	Q3ZYU4	Conserved domain protein OS=Dehalococcoides mccartyi (strain CBDB1) GN=cbdbA1368 PE=4 SV=1	FALSE	0	305.52	38	24	3302	24	1	1015	106.8	4.68	High	High	High	High	High	High	High	High	High	High	High	High	2.31817e+09	2.91233e+09	3.36927e+09	8.97476e+09	1.28325e+10	2.82268e+09	5.4066e+09	3.49066e+09	8.84551e+09	2.7134e+09	2.89911e+09	9.83349e+09
cbdbA521	Q3ZZV3	UvrABC system protein A OS=Dehalococcoides mccartyi (strain CBDB1) GN=uvrA PE=3 SV=1	FALSE	0	301.757	61	50	416	50	1	944	103.2	6.95	High	High	High	High	High	High	High	High	High	High	High	High	1.0175e+07	4.42034e+07	1.40926e+07	1.47554e+08	2.16288e+08	1.1062e+07	1.22637e+08	2.01587e+08	9.23529e+07	7.39568e+06	1.90316e+07	3.71014e+07
cbdbA719	Q3ZXC3	Phosphoglycerate kinase OS=Dehalococcoides mccartyi (strain CBDB1) GN=pgk PE=3 SV=1	FALSE	0	300.281	79	33	559	33	1	397	43.1	5.62	High	High	High	High	High	High	High	High	High	High	High	High	1.9877e+07	3.24971e+07	3.07756e+07	6.8625e+08	7.45717e+08	4.60324e+07	5.34535e+08	5.46013e+08	4.77727e+08	3.42215e+07	2.99144e+07	1.85564e+08
cbdbA718	Q3ZXC4	Putative phosphoglycerate mutase,2,3-bisphosphoglycerate-independent OS=Dehalococcoides mccartyi (strain CBDB1) GN=cbdbA718 PE=4 SV=1	FALSE	0	299.605	72	29	621	29	1	401	43.2	6.79	High	High	High	High	High	High	High	High	High	High	High	High	4.63892e+07	3.94077e+07	4.97169e+07	4.7078e+08	5.11708e+08	6.44686e+07	3.81212e+08	4.60668e+08	4.67584e+08	2.55805e+07	3.5146e+07	2.11595e+08
cbdbA11	Q3ZWB3	Branched-chain amino acid aminotransferase OS=Dehalococcoides mccartyi (strain CBDB1) GN=ilvE PE=3 SV=1	FALSE	0	298.138	85	31	658	31	1	306	34.6	6.35	High	High	High	High	High	High	High	High	High	High	High	High	7.39746e+07	6.70265e+07	9.1916e+07	4.31625e+08	5.96702e+08	1.04052e+08	4.38107e+08	4.88941e+08	8.02656e+08	4.39037e+07	6.95929e+07	1.84301e+08
cbdbA681	Q3ZX69	Pyruvic-ferredoxin oxidoreductase, alpha subunit OS=Dehalococcoides mccartyi (strain CBDB1) GN=porA PE=4 SV=1	FALSE	0	297.886	64	30	704	30	1	390	42.7	5.08	High	High	High	High	High	High	High	High	High	High	High	High	1.39669e+08	1.85984e+08	1.7174e+08	9.13635e+08	1.23302e+09	1.82213e+08	5.46888e+08	5.76099e+08	9.03388e+08	6.76988e+07	1.66618e+08	3.94554e+08
cbdbA901	Q3ZXS3	Acyl-CoA synthetase (AMP-forming) / AMP-acid ligase OS=Dehalococcoides mccartyi (strain CBDB1) GN=cbdbA901 PE=4 SV=1	FALSE	0	295.951	68	43	443	43	1	630	71	6.98	High	High	High	High	High	High	High	High	High	Not Found	High	High	1.70852e+07	3.01848e+07	8.4541e+06	1.57831e+08	3.11072e+08	4.89096e+07	2.49645e+08	2.46222e+08	1.38647e+08		2.10466e+07	6.67699e+07
cbdbA392	Q3ZZG1	Metallo-beta-lactamase family protein OS=Dehalococcoides mccartyi (strain CBDB1) GN=cbdbA392 PE=4 SV=1	FALSE	0	295.246	66	37	557	37	1	551	60.4	7.68	High	High	High	High	High	High	High	High	High	High	High	High	3.34534e+07	7.83698e+07	1.28983e+07	4.81824e+08	543469371	8.40498e+07	1.03113e+08	3.58747e+08	1.97033e+08	2.94454e+06	7.05029e+07	1.68301e+08
cbdbA804	Q3ZXI7	3-isopropylmalate dehydrogenase OS=Dehalococcoides mccartyi (strain CBDB1) GN=leuB PE=3 SV=1	FALSE	0	294.439	75	37	681	37	1	365	39.3	8.41	High	High	High	High	High	High	High	High	High	High	High	High	1.27735e+08	1.16997e+08	1.38807e+08	8.89405e+08	9.12135e+08	9.00884e+07	3.07908e+08	3.97731e+08	7.00166e+08	5.50494e+07	1.13643e+08	3.0572e+08
cbdbA1012	Q3ZY20	Isoleucine--tRNA ligase OS=Dehalococcoides mccartyi (strain CBDB1) GN=ileS PE=3 SV=1	FALSE	0	294.017	45	42	463	42	1	1014	116.1	6.06	High	High	High	High	High	High	High	High	High	High	High	High	3.67231e+07	4.42619e+07	2.8866e+07	3.76682e+08	1.98773e+08	8.15672e+07	1.93585e+08	2.0197e+08	1.42055e+08	1.35709e+07	6.33783e+07	6.90767e+07
cbdbA329	Q3ZZB5	IMP dehydrogenase family protein OS=Dehalococcoides mccartyi (strain CBDB1) GN=cbdbA329 PE=3 SV=1	FALSE	0	293.713	65	21	745	21	1	381	40.4	7.4	High	High	High	High	High	High	High	High	High	High	High	High	2.20458e+08	1.76249e+08	1.60166e+08	8.51671e+08	1.03989e+09	3.10227e+08	6.54569e+08	7.09037e+08	8.51365e+08	7.25029e+07	2.32559e+08	3.56701e+08
cbdbA285	Q3ZZA2	Cell division protein FtsZ OS=Dehalococcoides mccartyi (strain CBDB1) GN=ftsZ PE=3 SV=1	FALSE	0	291.974	80	28	697	28	1	376	39.5	5.53	High	High	High	High	High	High	High	High	High	High	High	High	7.53192e+07	8.20736e+07	1.15055e+08	1.70358e+09	2.64518e+09	1.91997e+08	1.79998e+09	7.50521e+08	9.244e+08	7.11786e+07	3.785e+07	6.9863e+08
cbdbA622	Q3ZX20	Cell division protein FtsZ OS=Dehalococcoides mccartyi (strain CBDB1) GN=ftsZ PE=3 SV=1	FALSE	0	291.627	73	25	360	25	1	376	39.5	6.43	High	Not Found	Not Found	High	High	High	High	High	High	Not Found	Not Found	High	5.0686e+07			9.45762e+08	8.82244e+08	7.28339e+07	5.47315e+08	2.78369e+08	8.34385e+07			1.3594e+08
cbdbA1196	Q3ZYF0	Arginine--tRNA ligase OS=Dehalococcoides mccartyi (strain CBDB1) GN=argS PE=3 SV=1	FALSE	0	290.415	68	34	520	34	1	556	61.8	5.76	High	High	High	High	High	High	High	High	High	High	High	High	4.88976e+07	2.41135e+07	1.8778e+07	1.78451e+08	2.08002e+08	6.63394e+07	1.77186e+08	2.13513e+08	1.95585e+08	1.58679e+07	3.80165e+07	1.03603e+08
cbdbA82	Q3ZWF7	Sensor histidine kinase OS=Dehalococcoides mccartyi (strain CBDB1) GN=rdhC PE=4 SV=1	FALSE	0	290.066	70	40	450	39	1	501	56.3	8.43	High	High	High	High	High	High	High	High	High	High	High	High	1.94474e+07	4.03052e+07	2.91196e+06	1.34787e+08	2.8627e+08	6.6416e+07	9.11432e+07	1.13806e+08	2.22863e+07	4.24983e+06	4.59076e+07	8.78164e+07
cbdbA1103	Q3ZY84	Riboflavin biosynthesis protein RibBA OS=Dehalococcoides mccartyi (strain CBDB1) GN=ribA PE=3 SV=1	FALSE	0	288.803	66	29	650	29	1	403	44.3	6.21	High	High	High	High	High	High	High	High	High	High	High	High	2.68594e+07	3.21357e+07	1.12607e+07	1.06067e+09	1.17165e+09	2.55913e+07	6.94394e+08	6.42657e+08	6.40754e+08	1.13817e+07	1.03782e+07	2.63425e+08
cbdbA971	Q3ZXW5	Conserved domain protein OS=Dehalococcoides mccartyi (strain CBDB1) GN=cbdbA971 PE=4 SV=1	FALSE	0	285.824	71	30	601	30	1	270	30	5.02	High	High	Not Found	High	High	High	High	High	High	High	High	High	1.31153e+07	2.28921e+07		1.37119e+09	1.46136e+09	2.65699e+07	1.1646e+09	8.10695e+08	1.53911e+09	6.02073e+06	6.5949e+06	3.30362e+08
cbdbA408	Q3ZZJ8	Putative isocitrate dehydrogenase OS=Dehalococcoides mccartyi (strain CBDB1) GN=cbdbA408 PE=3 SV=1	FALSE	0	284.867	58	26	685	26	1	359	39.3	7.28	High	High	High	High	High	High	High	High	High	High	High	High	1.02772e+08	1.15862e+08	1.49575e+08	6.68505e+08	7.23807e+08	1.36085e+08	4.75083e+08	4.03231e+08	4.98184e+08	1.2246e+08	1.25745e+08	4.38123e+08
cbdbA663	Q3ZX84	Aspartate--tRNA(Asp/Asn) ligase OS=Dehalococcoides mccartyi (strain CBDB1) GN=aspS PE=3 SV=1	FALSE	0	284.827	66	38	397	38	1	598	66.9	5.92	High	High	High	High	High	High	High	High	High	High	High	High	2.09609e+07	1.70647e+07	3.7807e+07	1.78288e+08	2.06764e+08	9.44685e+06	1.52768e+08	2.00052e+08	1.66385e+08	3.63734e+07	2.82209e+07	1.02877e+08
cbdbA1314	Q3ZYP6	Putative mannosyl-3-phosphoglycerate synthase OS=Dehalococcoides mccartyi (strain CBDB1) GN=cbdbA1314 PE=4 SV=1	FALSE	0	283.04	62	37	283	37	1	694	77.8	6.06	High	High	High	High	High	High	High	High	High	Not Found	High	High	3.25939e+07	3.13257e+07	2.31563e+06	1.0051e+08	1.18418e+08	4.61845e+07	1.12118e+08	8.46769e+07	5.60906e+07		2.44851e+07	4.78276e+07
cbdbA988	Q3ZXZ5	Phenylacetate-coenzyme A ligase OS=Dehalococcoides mccartyi (strain CBDB1) GN=cbdbA988 PE=3 SV=1	FALSE	0	282.607	51	33	540	33	1	439	49	6.16	High	High	High	High	High	High	High	High	High	Not Found	High	High	2.35242e+07	2.32313e+07	1.87751e+07	5.86532e+08	7.38244e+08	2.72728e+07	6.43128e+08	3.89849e+08	7.22384e+08		2.15654e+07	1.9534e+08
cbdbA1001	Q3ZXY4	Probable cytosol aminopeptidase OS=Dehalococcoides mccartyi (strain CBDB1) GN=pepA PE=3 SV=1	FALSE	0	282.153	65	26	629	26	1	497	52.9	5.35	High	High	High	High	High	High	High	High	High	High	High	High	1.01861e+08	8.71636e+07	1.58997e+08	5.74588e+08	5.82208e+08	1.06808e+08	5.39781e+08	4.0673e+08	1.0189e+09	5.88977e+07	1.09508e+08	3.46909e+08
cbdbA439	Q3ZZM4	50S ribosomal protein L3 OS=Dehalococcoides mccartyi (strain CBDB1) GN=rplC PE=3 SV=1	FALSE	0	281.953	94	30	788	30	1	205	21.8	9.69	High	High	High	High	High	High	High	High	High	High	High	High	6.56526e+07	1.2898e+08	5.38375e+07	2.18456e+09	1.81252e+09	1.11929e+08	1.31614e+09	1.16053e+09	1.88506e+09	3.43443e+07	7.68703e+07	3.00149e+08
cbdbA793	Q3ZXJ7	Iron-regulated ABC transporter, atp-binding protein, SufC OS=Dehalococcoides mccartyi (strain CBDB1) GN=sufC PE=4 SV=1	FALSE	0	278.85	72	31	469	31	1	251	28	7.05	High	High	High	High	High	High	High	High	High	High	High	High	1.47885e+07	6.25394e+06	1.43519e+07	3.92637e+08	5.27731e+08	4.73688e+07	3.60394e+08	2.45671e+08	6.32392e+08	2.37299e+07	9.41333e+06	1.04846e+08
cbdbA849	Q3ZXP5	Putative hydrogenase subunit OS=Dehalococcoides mccartyi (strain CBDB1) GN=cbdbA849 PE=4 SV=1	FALSE	0	277.641	70	35	516	35	1	461	50.3	7.5	High	High	High	High	High	High	High	High	High	High	High	High	3.37069e+07	2.56926e+07	1.30886e+07	2.97272e+08	4.9417e+08	5.46543e+07	2.8877e+08	3.77777e+08	2.96886e+08	6.62606e+06	3.00471e+07	1.45532e+08
cbdbA139	Q3ZWK7	Oxaloacetate decarboxylase, alpha subunit OS=Dehalococcoides mccartyi (strain CBDB1) GN=oadA PE=4 SV=1	FALSE	0	276.8	54	31	495	31	1	582	63.4	5.64	High	High	High	High	High	High	High	High	High	High	High	High	2.52248e+07	2.49526e+07	2.30094e+07	3.37506e+08	4.3472e+08	4.83554e+07	1.39189e+08	2.38345e+08	2.63869e+08	5.18334e+06	4.25784e+07	1.1253e+08
cbdbA569	Q3ZWY9	Glyceraldehyde-3-phosphate dehydrogenase, typeI OS=Dehalococcoides mccartyi (strain CBDB1) GN=gap PE=3 SV=1	FALSE	0	274.105	78	29	653	29	1	335	36.4	6.87	High	High	High	High	High	High	High	High	High	High	High	High	1.07944e+08	1.23321e+08	8.11698e+07	1.12468e+09	1.11934e+09	9.28792e+07	1.14247e+09	1.0215e+09	1.28874e+09	5.72492e+07	5.92564e+07	5.64056e+08
cbdbA765	Q3ZXH5	Glycine--tRNA ligase OS=Dehalococcoides mccartyi (strain CBDB1) GN=glyS PE=3 SV=1	FALSE	0	273.966	58	34	679	34	1	433	50	6.09	High	High	High	High	High	High	High	High	High	High	High	High	2.32591e+08	2.43665e+08	1.11177e+08	3.55224e+08	4.65168e+08	2.03203e+08	3.99951e+08	3.91976e+08	3.66381e+08	1.60978e+07	2.43276e+08	2.11222e+08
cbdbA685	Q3ZX65	Putative [Fe] hydrogenase, HymC subunit OS=Dehalococcoides mccartyi (strain CBDB1) GN=hymC PE=4 SV=1	FALSE	0	272.4	91	28	689	28	1	240	26.6	7.74	High	High	High	High	High	High	High	High	High	High	High	High	3.47944e+07	7.93275e+07	7.54626e+07	1.74035e+09	1.77245e+09	7.03991e+07	1.21715e+09	9.34583e+08	1.1328e+09	4.1176e+07	7.4024e+07	4.68953e+08
cbdbA1145	Q3ZYE1	DNA polymerase III subunit beta OS=Dehalococcoides mccartyi (strain CBDB1) GN=dnaN PE=4 SV=1	FALSE	0	271.915	73	30	1099	30	1	378	40.6	5.5	High	High	High	High	High	High	High	High	High	High	High	High	1.57515e+08	1.06833e+08	2.73186e+08	1.35721e+09	1.63979e+09	1.60345e+08	1.18478e+09	1.17505e+09	1.46757e+09	1.62696e+08	2.21866e+08	7.33881e+08
cbdbA554	Q3ZWY0	Serine--tRNA ligase OS=Dehalococcoides mccartyi (strain CBDB1) GN=serS PE=3 SV=1	FALSE	0	268.434	54	33	439	33	1	413	47.4	5.83	High	High	High	High	High	High	High	High	High	High	High	High	1.1597e+07	2.52787e+07	1.79657e+07	2.69818e+08	2.54342e+08	2.19814e+07	1.43752e+08	2.50278e+08	2.78051e+08	3.07418e+07	3.66493e+07	1.26581e+08
cbdbA334	Q3ZZB2	Methionine--tRNA ligase OS=Dehalococcoides mccartyi (strain CBDB1) GN=metG PE=3 SV=1	FALSE	0	262.159	67	35	390	35	1	553	63.3	6.48	Not Found	Not Found	High	High	High	Not Found	High	High	High	Not Found	High	High			1.27391e+07	1.47179e+08	2.98022e+08		1.23217e+08	1.2854e+08	1.47819e+08		5.81771e+07	5.91553e+07
cbdbA623	Q3ZX19	Cell division protein ftsA OS=Dehalococcoides mccartyi (strain CBDB1) GN=ftsA PE=3 SV=1	FALSE	0	257.693	73	29	605	29	1	400	43	6	High	High	High	High	High	High	High	High	High	Not Found	High	High	4.24489e+07	5.34905e+07	3.28142e+07	1.25691e+09	1.57223e+09	4.2101e+07	7.981e+08	7.77471e+08	9.58476e+08		2.15846e+07	5.58453e+08
cbdbA1336	Q3ZYS3	Nicotinate-nucleotide pyrophosphorylase OS=Dehalococcoides mccartyi (strain CBDB1) GN=nadC PE=3 SV=1	FALSE	0	255.263	68	24	688	24	1	286	30.6	5.73	High	High	High	High	High	High	High	High	High	High	High	High	9.65778e+07	8.1044e+07	4.23258e+07	1.24278e+09	1.66479e+09	8.33666e+07	1.46192e+09	1.61984e+09	1.26916e+09	2.61306e+07	5.60291e+07	6.05582e+08
cbdbA806	Q3ZXI5	3-isopropylmalate dehydratase large subunit OS=Dehalococcoides mccartyi (strain CBDB1) GN=leuC PE=3 SV=1	FALSE	0	253.168	58	29	717	29	1	416	44.5	7.2	High	High	High	High	High	High	High	High	High	High	High	High	8.88475e+07	5.85005e+07	6.87312e+07	5.88404e+08	7.3185e+08	1.70931e+08	5.73678e+08	7.31894e+08	5.81994e+08	2.67685e+07	1.04986e+08	2.48991e+08
cbdbA1122	Q3ZYB4	Threonine synthase OS=Dehalococcoides mccartyi (strain CBDB1) GN=thrC PE=3 SV=1	FALSE	0	252.829	75	31	437	31	1	348	36.6	8.09	High	High	High	High	High	High	High	High	High	High	High	High	3.09355e+07	3.225e+07	2.35846e+07	3.15145e+08	3.72956e+08	3.48971e+07	1.87754e+08	2.35014e+08	3.12106e+08	2.1491e+07	2.664e+07	1.64998e+08
cbdbA1643	Q3ZW41	Aspartyl/glutamyl-tRNA(Asn/Gln) amidotransferase subunit B OS=Dehalococcoides mccartyi (strain CBDB1) GN=gatB PE=3 SV=1	FALSE	0	250.733	63	33	365	33	1	492	54.7	5.62	High	High	High	High	High	High	High	High	High	Not Found	High	High	5.17971e+06	5.31684e+06	2.22793e+06	8.13183e+07	1.07671e+08	1.99479e+07	6.37818e+07	6.78449e+07	7.93122e+07		6.33221e+06	5.58563e+07
cbdbA534	Q3ZZU1	ATP synthase subunit b OS=Dehalococcoides mccartyi (strain CBDB1) GN=atpF PE=3 SV=1	FALSE	0	248.398	71	28	443	28	1	169	19.1	5.54	High	High	High	High	High	High	High	High	High	High	High	High	1.25908e+08	1.65305e+08	3.97227e+07	1.423e+09	1.01103e+09	2.31331e+08	8.97217e+08	6.91266e+08	6.74313e+08	1.31906e+07	1.59389e+08	2.95194e+08
cbdbA817	Q3ZXH7	GMP synthase [glutamine-hydrolyzing] OS=Dehalococcoides mccartyi (strain CBDB1) GN=guaA PE=3 SV=1	FALSE	0	246.973	75	35	347	35	1	533	59.6	6.2	High	High	High	High	High	High	High	High	High	Not Found	High	High	1.13307e+07	3.40474e+07	3.06942e+07	1.37183e+08	1.6795e+08	3.51201e+07	9.81206e+07	1.26147e+08	1.60987e+08		6.68537e+07	6.26927e+07
cbdbA815	Q3ZXH9	Dihydroxy-acid dehydratase OS=Dehalococcoides mccartyi (strain CBDB1) GN=ilvD PE=3 SV=1	FALSE	0	246.938	51	28	462	28	1	555	58.8	6.79	High	High	High	High	High	High	High	High	High	High	High	High	4.98077e+07	6.32105e+07	5.05312e+07	5.74886e+08	5.85669e+08	7.9804e+07	4.44322e+08	3.75589e+08	6.75047e+08	6.39608e+06	3.45639e+07	1.33085e+08
cbdbA325	Q3ZZB9	Phosphoribosylformylglycinamidine synthase subunit PurL OS=Dehalococcoides mccartyi (strain CBDB1) GN=purL PE=3 SV=1	FALSE	0	246.857	52	40	280	40	1	953	104	5.5	High	High	High	High	High	High	High	High	High	High	High	High	8.19544e+06	1.49025e+07	3.46433e+06	7.2057e+07	7.53209e+07	1.73215e+07	9.45042e+07	6.88143e+07	6.44797e+07	3.69861e+06	9.01148e+06	3.97987e+07
cbdbA682	Q3ZX68	Pyruvic-ferredoxin oxidoreductase, beta subunit OS=Dehalococcoides mccartyi (strain CBDB1) GN=porB PE=4 SV=1	FALSE	0	246.785	77	23	539	23	1	313	34.4	8.15	High	High	High	High	High	High	High	High	High	High	High	High	1.24121e+08	2.39903e+08	4.66839e+07	1.46154e+09	1.65265e+09	1.55201e+08	1.03464e+09	9.36638e+08	1.33397e+09	8.5059e+06	1.85478e+08	5.5776e+08
cbdbA954	Q3ZXY0	50S ribosomal protein L7/L12 OS=Dehalococcoides mccartyi (strain CBDB1) GN=rplL PE=3 SV=1	FALSE	0	244.029	75	22	915	22	1	123	12.7	5.01	High	High	High	High	High	High	High	High	High	High	High	High	3.53545e+07	3.90512e+07	4.79004e+07	3.21689e+09	4.04419e+09	6.58197e+07	2.21727e+09	1.38097e+09	2.47789e+09	2.51634e+07	7.55627e+07	1.54804e+09
cbdbA1453	Q3ZZ08	Putative reductive dehalogenase OS=Dehalococcoides mccartyi (strain CBDB1) GN=rdhA PE=4 SV=1	FALSE	0	243.291	60	22	400	13	1	495	54.3	6.64	High	High	High	High	High	High	High	High	High	High	High	High	6.70744e+07	9.28702e+07	9.97763e+07	5.85273e+07	5.11189e+07	5.53577e+07	2.36536e+08	1.17902e+08	4.40821e+08	3.88131e+06	1.62554e+07	8.57185e+07
cbdbA404	Q3ZZK1	Acyl CoA biotin-dependant carboxyltransferase OS=Dehalococcoides mccartyi (strain CBDB1) GN=cbdbA404 PE=4 SV=1	FALSE	0	242.733	62	31	322	31	1	516	56.1	7.61	High	High	High	High	High	High	High	High	High	High	High	High	1.80563e+07	2.13133e+07	1.25765e+07	2.58473e+08	2.56763e+08	3.42455e+07	1.40748e+08	1.44527e+08	1.63368e+08	3.80902e+06	1.99048e+07	8.77692e+07
cbdbA1708	Q3ZW76	Homocitrate synthase OS=Dehalococcoides mccartyi (strain CBDB1) GN=cbdbA1708 PE=4 SV=1	FALSE	0	242.044	79	27	405	27	1	415	45.6	5.76	High	High	High	High	High	High	High	High	High	High	High	High	2.8488e+07	2.46973e+07	2.67587e+07	3.85926e+08	4.60281e+08	3.58484e+07	1.95728e+08	3.11621e+08	456678262	1.40242e+07	2.17935e+07	2.4554e+08
cbdbA894	Q3ZXQ4	Acyl-CoA synthetase (AMP-forming) / AMP-acid ligase OS=Dehalococcoides mccartyi (strain CBDB1) GN=cbdbA894 PE=4 SV=1	FALSE	0	241.608	68	29	409	29	1	429	48.4	6.48	High	High	High	High	High	High	High	High	High	High	High	High	9.5837e+06	1.07948e+07	8.15075e+06	3.21305e+08	3.45946e+08	3.13752e+07	2.37426e+08	1.71316e+08	3.17022e+08	5.56301e+06	1.18625e+07	1.20465e+08
cbdbA873	Q3ZXS2	Twitching mobility protein OS=Dehalococcoides mccartyi (strain CBDB1) GN=pilT PE=4 SV=1	FALSE	0	240.665	78	26	553	24	1	360	40.5	6.96	High	High	High	High	High	High	High	High	High	High	High	High	3.20455e+07	3.39634e+07	2.44839e+07	4.66952e+08	6.25354e+08	5.33353e+07	3.50295e+08	4.41321e+08	5.33319e+08	1.08e+07	2.674e+07	9.98717e+07
cbdbA409	Q3ZZJ7	Malate dehydrogenase OS=Dehalococcoides mccartyi (strain CBDB1) GN=mdh PE=3 SV=1	FALSE	0	238.532	79	23	515	23	1	307	32	7.84	High	High	High	High	High	High	High	High	High	High	High	High	2.96596e+07	5.42295e+07	2.89073e+07	8.63032e+08	6.83211e+08	6.97572e+07	4.3896e+08	6.67986e+08	4.69984e+08	1.48106e+07	6.64752e+07	2.28289e+08
cbdbA453	Q3ZZN4	50S ribosomal protein L6 OS=Dehalococcoides mccartyi (strain CBDB1) GN=rplF PE=3 SV=1	FALSE	0	236.754	82	22	665	22	1	182	19.5	9.92	High	High	High	High	High	High	High	High	High	High	High	High	3.56744e+07	4.69846e+07	4.92507e+07	1.19594e+09	1.06134e+09	5.10788e+07	6.09496e+08	698009093	1.05633e+09	7.27995e+07	1.44839e+07	4.76485e+08
cbdbA1302	Q3ZYQ7	Type II secretion system protein GspE OS=Dehalococcoides mccartyi (strain CBDB1) GN=gspE PE=4 SV=1	FALSE	0	236.34	50	34	363	34	1	778	86.1	6.35	High	High	High	High	High	High	High	High	High	High	High	High	1.58828e+07	1.61423e+07	1.12982e+07	1.27794e+08	1.43364e+08	1.01144e+07	9.13429e+07	1.05947e+08	9.88841e+07	9.77561e+06	9.59197e+06	6.66075e+07
cbdbA826	Q3ZXL7	Histidinol dehydrogenase OS=Dehalococcoides mccartyi (strain CBDB1) GN=hisD PE=3 SV=1	FALSE	0	232.683	57	31	427	31	1	436	46.9	6.57	High	High	High	High	High	High	High	High	High	High	High	High	1.60585e+07	4.10599e+07	2.72482e+07	1.84682e+08	2.02339e+08	4.82399e+07	3.17332e+08	3.66536e+08	3.79995e+08	6.96949e+06	5.09239e+07	1.04172e+08
cbdbA921	Q3ZXT9	3-oxoacyl-[acyl-carrier-protein] synthase 2 OS=Dehalococcoides mccartyi (strain CBDB1) GN=fabF PE=3 SV=1	FALSE	0	232.137	65	22	396	22	1	422	44.2	5.59	High	High	High	High	High	High	High	High	High	High	High	High	3.22316e+07	5.55597e+07	2.31044e+07	5.04394e+08	5.71598e+08	4.06254e+07	3.1768e+08	3.18219e+08	3.36039e+08	3.88933e+07	8.72894e+07	1.2357e+08
cbdbA525	Q3ZZU9	RNA polymerase sigma factor SigA OS=Dehalococcoides mccartyi (strain CBDB1) GN=rpoD PE=3 SV=1	FALSE	0	231.209	56	30	326	30	1	520	59	5.03	High	High	High	High	High	High	High	High	High	High	High	High	3.25068e+07	1.78268e+07	2.51341e+07	2.12905e+08	3.3713e+08	3.69671e+07	2.12542e+08	1.09645e+08	1.85023e+08	3.13138e+07	6.46372e+07	1.03677e+08
cbdbA266	Q3ZWU9	Uncharacterized protein OS=Dehalococcoides mccartyi (strain CBDB1) GN=cbdbA266 PE=4 SV=1	FALSE	0	231.158	66	41	319	41	1	530	59.2	5.66	High	High	High	High	High	High	High	High	High	High	High	High	1.48708e+07	2.42622e+07	1.33417e+07	1.66332e+08	1.92668e+08	1.66924e+07	1.06316e+08	159114259	2.26399e+08	5.12419e+06	4.81657e+07	7.60519e+07
cbdbA1055	Q3ZY30	Archaeal-type glutamate synthase [NADPH] OS=Dehalococcoides mccartyi (strain CBDB1) GN=cbdbA1055 PE=3 SV=1	FALSE	0	229.673	64	35	536	35	1	500	53.9	8.05	High	High	High	High	High	High	High	High	High	High	High	High	8.9809e+07	1.44472e+08	3.94225e+07	5.29932e+08	4.96879e+08	1.56863e+08	4.17226e+08	4.70157e+08	2.48346e+08	2.40475e+07	1.05622e+08	1.57205e+08
cbdbA102	Q3ZWI6	Uncharacterized protein OS=Dehalococcoides mccartyi (strain CBDB1) GN=cbdbA102 PE=4 SV=1	FALSE	0	226.598	49	37	254	37	1	794	90.2	7.99	High	High	Not Found	High	High	High	High	High	High	Not Found	Not Found	High	2.90697e+07	1.8983e+07		7.60182e+07	6.77998e+07	3.93947e+07	1.40942e+08	1.00907e+08	8.85702e+07			6.93618e+07
cbdbA424	Q3ZZI7	Chorismate mutase/prephenate dehydratase (P-protein) OS=Dehalococcoides mccartyi (strain CBDB1) GN=pheA PE=4 SV=1	FALSE	0	225.273	67	27	629	26	1	358	40.2	6.28	High	High	High	High	High	High	High	High	High	High	High	High	8.02861e+07	8.64779e+07	1.20277e+08	9.95452e+08	1.11514e+09	1.27122e+08	1.05012e+09	9.55854e+08	1.10679e+09	7.97012e+07	1.80083e+08	4.47033e+08
cbdbA410	Q3ZZJ6	Uncharacterized protein OS=Dehalococcoides mccartyi (strain CBDB1) GN=cbdbA410 PE=4 SV=1	FALSE	0	223.793	94	20	505	20	1	123	14.1	5.02	High	High	High	High	High	High	High	High	High	High	High	High	1.78625e+08	2.43266e+07	1.95909e+08	1.58891e+09	1.31578e+09	1.15173e+08	3.66781e+08	1.1508e+09	1.36295e+09	9.49128e+07	1.40285e+07	5.09728e+08
cbdbA1436	Q3ZYY2	DNA polymerase III, alpha subunit OS=Dehalococcoides mccartyi (strain CBDB1) GN=dnaE PE=4 SV=1	FALSE	0	223.3	40	41	218	41	1	1170	131.4	5.47	High	High	High	High	High	High	High	High	High	Not Found	High	High	1.66676e+07	5.66014e+06	1.09879e+07	7.56411e+07	1.04073e+08	2.92821e+07	8.10496e+07	1.95107e+07	5.07376e+07		8.75738e+06	3.37969e+07
cbdbA813	Q3ZXI0	Acetolactate synthase OS=Dehalococcoides mccartyi (strain CBDB1) GN=ilvB PE=3 SV=1	FALSE	0	222.964	50	28	469	28	1	569	61.8	6.01	High	High	High	High	High	High	High	High	High	High	High	High	2.39146e+07	3.43736e+07	3.29465e+07	6.12886e+08	6.95609e+08	4.96712e+07	3.42645e+08	2.26395e+08	3.62469e+08	5.30424e+06	4.15445e+07	2.04527e+08
cbdbA596	Q3ZWZ2	Hydrogenase, group 3, VhuG subunit OS=Dehalococcoides mccartyi (strain CBDB1) GN=cbdbA596 PE=4 SV=1	FALSE	0	221.11	53	24	498	24	1	312	34.1	6.18	High	High	High	High	High	High	High	High	High	High	High	High	3.34371e+07	3.36168e+07	4.82812e+07	1.17335e+09	1.61415e+09	3.78516e+07	1.26566e+09	1.87896e+09	2.27773e+09		3.1394e+07	6.41363e+08
cbdbA1399	Q3ZYW4	[NiFe] hydrogenase maturation protein HypF OS=Dehalococcoides mccartyi (strain CBDB1) GN=hypF PE=4 SV=1	FALSE	0	220.85	51	34	219	34	1	763	84.4	6.95	High	High	High	High	High	High	High	High	High	Not Found	High	High	1.02973e+07	1.19852e+07	5.32142e+06	5.11063e+07	4.13654e+07	1.49223e+07	3.58149e+07	4.9966e+07	4.52478e+07		7.1893e+06	2.24919e+07
cbdbA430	Q3ZZN2	3-dehydroquinate dehydratase OS=Dehalococcoides mccartyi (strain CBDB1) GN=aroD PE=3 SV=1	FALSE	0	217.188	80	18	373	18	1	222	24.5	8.06	High	High	High	High	High	High	High	High	High	High	High	High	4.56519e+07	4.53138e+07	6.06588e+07	2.89743e+08	2.83908e+08	5.37657e+07	2.60525e+08	2.92769e+08	1.39026e+08	1.82824e+07	3.30666e+07	2.11924e+08
cbdbA1199	Q3ZYE8	Enoyl-[acyl-carrier-protein] reductase [NADH] OS=Dehalococcoides mccartyi (strain CBDB1) GN=fabI PE=3 SV=1	FALSE	0	216.634	71	21	467	21	1	279	30.2	6.79	High	High	High	High	High	High	High	High	High	High	High	High	6.64976e+07	6.10184e+07	7.14164e+07	8.12238e+08	7.91207e+08	9.31839e+07	4.07878e+08	5.22255e+08	4.52801e+08	3.16649e+07	1.09998e+08	3.14598e+08
cbdbA1371	Q3ZYU1	CTP synthase OS=Dehalococcoides mccartyi (strain CBDB1) GN=pyrG PE=3 SV=1	FALSE	0	216.492	51	28	398	28	1	544	60.3	6.2	High	High	High	High	High	High	High	High	High	High	High	High	8.53135e+07	5.83283e+07	3.96045e+07	3.49992e+08	4.42646e+08	1.05794e+08	2.51523e+08	3.78966e+08	3.27206e+08	1.37552e+07	5.08231e+07	1.23271e+08
cbdbA738	Q3ZXF0	K(+)-insensitive pyrophosphate-energized proton pump OS=Dehalococcoides mccartyi (strain CBDB1) GN=hppA PE=3 SV=1	FALSE	0	215.451	29	26	417	26	1	708	73.3	6.07	High	High	High	High	High	High	High	High	High	Not Found	High	High	1.26246e+07	1.46009e+07	22302686	7.54632e+08	5.6592e+08	1.45917e+07	6.3329e+08	6.67503e+08	6.39842e+08		6511285	172959483
cbdbA318	Q3ZZC4	Ribosome-recycling factor OS=Dehalococcoides mccartyi (strain CBDB1) GN=frr PE=3 SV=1	FALSE	0	213.286	90	28	526	28	1	185	21	8.09	Not Found	High	High	High	High	High	High	High	High	High	High	High		5.27818e+07	1.01928e+08	7.02567e+08	7.05589e+08	8.72354e+06	5.704e+08	4.42024e+08	6.99257e+08	5.32875e+07	1.04621e+07	3.04527e+08
cbdbA651	Q3ZX46	Carbon monoxide dehydrogenase/acetyl-CoA synthase large subunit OS=Dehalococcoides mccartyi (strain CBDB1) GN=acsC PE=4 SV=1	FALSE	0	213.108	62	30	379	30	1	448	48.9	7.94	High	High	High	High	High	High	High	High	High	High	High	High	6.00513e+07	6.253e+07	4.49829e+07	1.59997e+08	2.22656e+08	5.98061e+07	3.20534e+08	2.1405e+08	1.17545e+08	1.44587e+07	6.06615e+07	8.54536e+07
cbdbA688	Q3ZXA5	Conserved domain protein OS=Dehalococcoides mccartyi (strain CBDB1) GN=cbdbA688 PE=4 SV=1	FALSE	0	213.001	87	20	373	20	1	128	14.6	7.03	High	High	High	High	High	High	High	High	High	High	High	High	9.46764e+07	7.98899e+07	9.8757e+07	1.19427e+09	1.13229e+09	5.09973e+07	5.19074e+08	3.193e+08	4.44837e+08	1.57056e+08	4.28804e+07	4.65569e+08
cbdbA654	Q3ZX44	Carbon monoxide dehydrogenase/acetyl-CoA synthase small subunit OS=Dehalococcoides mccartyi (strain CBDB1) GN=acsD PE=4 SV=1	FALSE	0	212.383	60	27	397	27	1	313	34.3	4.96	High	High	High	High	High	High	High	High	High	High	High	High	4.15552e+07	8.2912e+07	1.14845e+08	5.0557e+08	5.98607e+08	7.69918e+07	3.98956e+08	4.25619e+08	5.23316e+08	4.10405e+07	1.62152e+08	1.8644e+08
cbdbA508	Q3ZZR5	Diaminopimelate decarboxylase OS=Dehalococcoides mccartyi (strain CBDB1) GN=lysA PE=3 SV=1	FALSE	0	211.91	53	24	434	24	1	434	47.4	5.83	High	High	High	High	High	High	High	High	High	High	High	High	1.93407e+07	1.55483e+07	2.96971e+07	4.39031e+08	5.02335e+08	2.44051e+07	5.087e+08	5.26802e+08	4.93974e+08		2.24356e+07	1.99872e+08
cbdbA715	Q3ZXC7	Diaminopimelate epimerase OS=Dehalococcoides mccartyi (strain CBDB1) GN=dapF PE=3 SV=1	FALSE	0	211.643	62	17	485	17	1	284	31.5	6.39	High	High	High	High	High	High	High	High	High	High	High	High	1.39203e+08	1.15095e+08	7.57708e+07	4.07114e+08	4.05283e+08	2.73856e+08	3.44316e+08	4.19516e+08	4.10327e+08	5.06525e+07	1.38985e+08	1.77292e+08
cbdbA465	Q3ZZP7	30S ribosomal protein S4 OS=Dehalococcoides mccartyi (strain CBDB1) GN=rpsD PE=3 SV=1	FALSE	0	210.759	86	25	676	25	1	207	23.5	10.21	High	High	High	High	High	High	High	High	High	High	High	High	1.32087e+08	1.5975e+08	1.3928e+08	1.52778e+09	1.53897e+09	1.72844e+08	1.1448e+09	1.50795e+09	9.24834e+08	1.48469e+08	1.30446e+08	4.51611e+08
cbdbA581	Q3ZX04	Soluble hydrogenase, tritium exchange subunit OS=Dehalococcoides mccartyi (strain CBDB1) GN=cbdbA581 PE=3 SV=1	FALSE	0	207.308	60	26	489	26	1	362	39.2	8.79	High	High	High	High	High	High	High	High	High	High	High	High	4.30284e+07	3.68706e+07	2.6598e+07	6.96117e+08	8.6653e+08	4.32685e+07	5.72914e+08	6.37985e+08	4.28223e+08	3.21866e+06	3.49197e+07	2.76696e+08
cbdbA897	Q3ZXQ1	Putative branched-chain amino acid ABC transporter,periplasmic amino acid-binding protein OS=Dehalococcoides mccartyi (strain CBDB1) GN=cbdbA897 PE=4 SV=1	FALSE	0	206.633	46	17	550	16	1	430	46.7	5	High	High	High	High	High	High	High	High	High	High	High	High	1.41636e+08	2.26767e+08	1.27248e+08	1.62783e+08	3.37691e+08	1.80376e+08	1.10621e+08	1.52718e+08	1.73247e+08	3.8223e+07	2.13615e+08	1.83733e+08
cbdbA327	Q3ZZB8	Pyridoxal biosynthesis lyase PdxS OS=Dehalococcoides mccartyi (strain CBDB1) GN=pdxS PE=3 SV=1	FALSE	0	206.146	64	22	765	22	1	293	31.2	6.32	High	High	High	High	High	High	High	High	High	High	High	High	1.54411e+08	1.04269e+08	1.75356e+08	1.32397e+09	1.63544e+09	2.33159e+08	8.90457e+08	7.32747e+08	1.56485e+09	6.4458e+07	1.95243e+08	4.71228e+08
cbdbA1591	Q3ZVY4	Sensor histidine kinase/response regulator OS=Dehalococcoides mccartyi (strain CBDB1) GN=cbdbA1591 PE=4 SV=1	FALSE	0	204.898	31	31	141	30	1	1092	122.2	6.49	High	High	High	High	High	High	High	High	High	Not Found	High	High	1.09879e+07	5.48877e+06		2.22967e+07	2.08407e+07	7.70085e+06	5.10395e+07	4.54025e+07	4.62916e+07		7.12053e+06	2.84587e+07
cbdbA956	Q3ZXX8	50S ribosomal protein L1 OS=Dehalococcoides mccartyi (strain CBDB1) GN=rplA PE=3 SV=1	FALSE	0	204.001	62	23	535	23	1	237	25.3	9.42	High	High	High	High	High	High	High	High	High	Not Found	High	High	8.29938e+07	1.65016e+08	6.7007e+07	1.8683e+09	2.10021e+09	2.28073e+08	8.00554e+08	1.13937e+09	8.64924e+08		1.63551e+08	5.538e+08
cbdbA1185	Q3ZYF9	Argininosuccinate lyase OS=Dehalococcoides mccartyi (strain CBDB1) GN=argH PE=3 SV=1	FALSE	0	202.924	49	28	335	28	1	461	51.2	6.23	High	High	High	High	High	High	High	High	High	High	High	High	1.11196e+07	6.94452e+06	3.12693e+07	5.94182e+08	2.58371e+08	1.8178e+07	3.24954e+08	3.65209e+08	3.78099e+08	5.80058e+06	2.53384e+07	1.38536e+08
cbdbA958	Q3ZXX6	Transcription termination/antitermination protein NusG OS=Dehalococcoides mccartyi (strain CBDB1) GN=nusG PE=3 SV=1	FALSE	0	202.455	70	17	418	17	1	177	20.2	6.61	High	High	High	High	High	High	High	High	High	High	High	High	8.7518e+07	1.46135e+08	1.16066e+08	3.10973e+08	2.30692e+08	1.21825e+08	2.84582e+08	3.29979e+08	4.78218e+08	1.92558e+07	9.54976e+07	6.70592e+07
cbdbA537	Q3ZZT8	ATP synthase gamma chain OS=Dehalococcoides mccartyi (strain CBDB1) GN=atpG PE=3 SV=1	FALSE	0	202.067	61	22	409	22	1	285	31.7	9.25	High	High	High	High	High	High	High	High	High	High	High	High	3.33962e+07	3.39065e+07	3.85227e+07	6.95017e+08	7.64457e+08	7.22183e+07	3.7769e+08	4.01795e+08	5.9002e+08	2.65279e+07	5.05306e+07	1.2948e+08
cbdbA1210	Q3ZYI7	Radical SAM domain protein OS=Dehalococcoides mccartyi (strain CBDB1) GN=cbdbA1210 PE=4 SV=1	FALSE	0	201.209	43	32	218	32	1	503	56.8	9.23	High	High	Not Found	High	High	High	High	High	High	Not Found	High	High	1.39931e+07	1.10304e+07		2.22728e+08	2.76208e+08	2.76776e+07	7.84994e+07	3.98016e+07	1.15212e+07		2.78343e+06	6.67181e+07
cbdbA283	Q3ZZA3	Cell division protein ftsA OS=Dehalococcoides mccartyi (strain CBDB1) GN=ftsA PE=3 SV=1	FALSE	0	200.917	59	26	299	26	1	408	43.8	6.8	High	High	High	High	High	High	High	High	High	Not Found	High	High	5.53675e+07	3.33931e+07	2.70184e+06	4.42616e+08	4.13428e+08	6.66084e+07	4.90521e+08	2.91128e+08	1.2478e+08		3.29254e+07	1.98341e+08
cbdbA1731	Q3ZZW8	Aspartokinase OS=Dehalococcoides mccartyi (strain CBDB1) GN=metL PE=3 SV=1	FALSE	0	199.871	63	21	454	21	1	405	43.1	5.85	High	High	High	High	High	High	High	High	High	High	High	High	6.34154e+07	8.17204e+07	6.76654e+07	7.28392e+08	6.33495e+08	2.14915e+08	5.84608e+08	4.78721e+08	8.26137e+08	1.77099e+07	1.29403e+08	3.29717e+08
cbdbA50	Q3ZWD3	Uncharacterized protein OS=Dehalococcoides mccartyi (strain CBDB1) GN=cbdbA50 PE=4 SV=1	FALSE	0	199.356	68	14	319	14	1	177	19.9	4.88	Not Found	Not Found	High	High	High	High	High	High	High	Not Found	High	High			2.21865e+07	2.51717e+08	3.47407e+08	5.59316e+07	1.36904e+08	2.48832e+08	3.33463e+08		5.74808e+07	6.64054e+07
cbdbA828	Q3ZXL6	Probable ATP phosphoribosyltransferase OS=Dehalococcoides mccartyi (strain CBDB1) GN=cbdbA828 PE=4 SV=1	FALSE	0	196.7	55	23	367	23	1	468	51.8	7.25	High	High	High	High	High	High	High	High	High	High	High	High	2.76462e+07	4.90372e+07	1.44774e+07	3.60436e+08	3.98165e+08	6.36597e+07	2.30089e+08	2.88566e+08	2.74809e+08	5.94706e+06	4.36679e+07	8.11917e+07
cbdbA141	Q3ZWK6	Acetyl-CoA carboxylase, biotin carboxylase OS=Dehalococcoides mccartyi (strain CBDB1) GN=accC PE=4 SV=1	FALSE	0	196.346	61	27	282	27	1	498	54.7	6.25	High	High	High	High	High	High	High	High	High	Not Found	High	High	8.73771e+06	1.76409e+07	1.84896e+07	2.96778e+08	2.84953e+08	1.66108e+07	9.81845e+07	1.53614e+08	2.35395e+08		1.75886e+07	5.01317e+07
cbdbA831	Q3ZXL3	SPFH domain protein OS=Dehalococcoides mccartyi (strain CBDB1) GN=cbdbA831 PE=4 SV=1	FALSE	0	195.419	52	18	525	18	1	267	29.8	6.39	High	High	High	High	High	High	High	High	High	High	High	High	1.63372e+07	4.15924e+07	5.70147e+07	1.62565e+09	1.61136e+09	7.95363e+07	2.56523e+09	1.49122e+09	1.54481e+09	4.22309e+06	8.10266e+07	6.96837e+08
cbdbA829	Q3ZXL5	ATP phosphoribosyltransferase regulatory subunit OS=Dehalococcoides mccartyi (strain CBDB1) GN=hisZ PE=3 SV=1	FALSE	0	195.179	68	24	434	24	1	412	46.1	4.61	High	High	High	High	High	High	High	High	High	High	High	High	7.40786e+07	7.96594e+07	3.90898e+07	6.04959e+08	1.01606e+09	7.87524e+07	6.46756e+08	6.94101e+08	8.58679e+08	6.1421e+07	4.73102e+07	3.64884e+08
cbdbA1293	Q3ZYL7	Tryptophan--tRNA ligase OS=Dehalococcoides mccartyi (strain CBDB1) GN=trpS PE=3 SV=1	FALSE	0	194.833	63	22	433	22	1	323	36.4	7.12	High	High	High	High	High	High	High	High	High	High	High	High	7.65221e+07	1.32579e+08	4.94376e+07	5.93455e+08	5.04826e+08	1.84479e+08	1.51787e+08	2.66792e+08	2.50224e+08	1.47276e+07	9.97042e+07	1.25609e+08
cbdbA1441	Q3ZZ17	Anthranilate synthase component I OS=Dehalococcoides mccartyi (strain CBDB1) GN=trpE PE=4 SV=1	FALSE	0	194.385	64	25	266	25	1	485	53.8	6.15	High	High	High	High	High	High	High	High	High	Not Found	High	High	4.27221e+07	6.15726e+07	3.57601e+07	1.76098e+08	1.8391e+08	7.3889e+07	189466821	219493537	1.29997e+08		2.13997e+07	7.78523e+07
cbdbA405	Q3ZZK0	3-isopropylmalate dehydratase large subunit OS=Dehalococcoides mccartyi (strain CBDB1) GN=leuC PE=3 SV=1	FALSE	0	193.548	62	21	474	21	1	417	44.2	6.62	High	High	High	High	High	High	High	High	High	High	High	High	3.49895e+07	6.34063e+07	2.09908e+07	7.66056e+08	1.0303e+09	5.73237e+07	3.18152e+08	8.1985e+08	6.90249e+08	9.89194e+06	6.35779e+07	2.92983e+08
cbdbA76	Q3ZWG4	Cysteine--tRNA ligase OS=Dehalococcoides mccartyi (strain CBDB1) GN=cysS PE=3 SV=1	FALSE	0	193.048	53	28	351	28	1	457	51.3	6.76	High	High	High	High	High	High	High	High	High	Not Found	High	High	3.78481e+07	1.90969e+07	1.99991e+07	3.27121e+08	3.21647e+08	4.67181e+07	2.58268e+08	2.59545e+08	2.15561e+08		7.20463e+07	8.05156e+07
cbdbA358	Q3ZZE4	Rubrerythrin OS=Dehalococcoides mccartyi (strain CBDB1) GN=cbdbA358 PE=4 SV=1	FALSE	0	192.641	97	20	516	20	1	159	17.2	6.79	High	High	High	High	High	High	High	High	High	High	High	High	1.66356e+08	1.33299e+08	1.5858e+08	4.64908e+08	1.48699e+09	1.3796e+08	3.77756e+08	9.27936e+08	1.54884e+09	3.77429e+07	8.14134e+07	5.75508e+08
cbdbA517	Q3ZZV6	Phosphate acyltransferase OS=Dehalococcoides mccartyi (strain CBDB1) GN=plsX PE=3 SV=1	FALSE	0	192.438	61	24	374	24	1	347	36.6	8.7	High	High	High	High	High	High	High	High	High	High	High	High	2.90029e+07	3.34925e+07	8.65558e+06	3.894e+08	4.22669e+08	3.04335e+07	1.53585e+08	259333462	1.36672e+08	1.25229e+07	6.1025e+07	1.3688e+08
cbdbA1292	Q3ZYL8	Aspartate aminotransferase OS=Dehalococcoides mccartyi (strain CBDB1) GN=aspC PE=3 SV=1	FALSE	0	192.103	65	25	294	25	1	398	44.2	7.05	High	High	High	High	High	High	High	High	High	High	High	High	3.19978e+07	7.69262e+07	5.07399e+07	1.65369e+08	1.70918e+08	6.74854e+07	1.82123e+08	2.02934e+08	2.84245e+08	3.36287e+07	6.9025e+07	8.42144e+07
cbdbA512	Q3ZZR1	ATP-binding protein, DnaC family OS=Dehalococcoides mccartyi (strain CBDB1) GN=cbdbA512 PE=4 SV=1	FALSE	0	191.805	71	34	201	34	1	435	49.2	7.62	High	High	High	High	High	High	High	High	High	Not Found	High	High	1.89493e+07	1.46703e+07	6.56097e+06	1.77945e+08	1.64992e+08	1.29434e+07	3.4258e+07	1.0002e+08	1.6874e+07		1.69504e+07	2.3868e+07
cbdbA1124	Q3ZYB2	Uncharacterized protein OS=Dehalococcoides mccartyi (strain CBDB1) GN=cbdbA1124 PE=4 SV=1	FALSE	0	191.05	58	19	260	19	1	422	47.2	4.7	High	High	High	High	High	High	High	High	High	High	High	High	1.20716e+07	3.26001e+07	1.82777e+07	1.98797e+08	2.91775e+08	2.5328e+07	6.71835e+07	8.26423e+07	1.89847e+08	5.03032e+06	1.58466e+07	6.46997e+07
cbdbA629	Q3ZX39	Transketolase OS=Dehalococcoides mccartyi (strain CBDB1) GN=tkt PE=3 SV=1	FALSE	0	189.941	45	25	460	25	1	666	72.3	5.92	High	High	Not Found	High	High	High	High	High	High	High	High	High	1.47988e+07	1.83017e+07		2.849e+08	3.14003e+08	2.08572e+07	2.36502e+08	2.73842e+08	2.48187e+08	5.69618e+06	1.5778e+07	1.03425e+08
cbdbA1700	Q3ZW84	Protein RecA OS=Dehalococcoides mccartyi (strain CBDB1) GN=recA PE=3 SV=1	FALSE	0	189.91	67	25	365	25	1	337	36	6.42	High	High	High	High	High	High	High	High	High	High	High	High	7.06349e+07	4.47219e+07	8.02054e+07	2.24478e+08	2.30429e+08	7.99214e+07	1.63414e+08	1.65784e+08	2.20442e+08	1.96241e+07	4.6262e+07	1.45965e+08
cbdbA1301	Q3ZYQ8	DNA-binding response regulator, LuxR family OS=Dehalococcoides mccartyi (strain CBDB1) GN=cbdbA1301 PE=4 SV=1	FALSE	0	189.901	80	21	388	21	1	225	24.8	6.35	High	High	High	High	High	High	High	High	High	High	High	High	2.61743e+07	1.40224e+07	3.45806e+07	2.54591e+08	2.3719e+08	5.11638e+07	2.18585e+08	1.71253e+08	4.72799e+08	2.23355e+07	56188119	1.04675e+08
cbdbA902	Q3ZXT8	Indolepyruvate oxidoreductase subunit IorA OS=Dehalococcoides mccartyi (strain CBDB1) GN=iorA PE=4 SV=1	FALSE	0	189.583	56	30	298	30	1	598	64	7.2	Not Found	High	High	High	High	High	High	High	High	High	High	High		4.85141e+06	9.14567e+06	1.42032e+08	1.76732e+08	5.27227e+06	1.28471e+08	8.23419e+07	1.25542e+08	6.32024e+06	2.70823e+06	6.34038e+07
cbdbA1059	Q3ZY27	Pyridine nucleotide-disulfide oxidoreductase family protein OS=Dehalococcoides mccartyi (strain CBDB1) GN=cbdbA1059 PE=4 SV=1	FALSE	0	189.354	57	24	267	24	1	435	46.4	6.2	High	High	High	High	High	High	High	High	High	High	High	High	7.69712e+07	6.82539e+07	7.09858e+07	2.2299e+08	4.77812e+08	8.96955e+07	6.91391e+07	1.35555e+08	3.35067e+08	2.23983e+07	7.49211e+07	1.45778e+08
cbdbA563	Q3ZWX1	Putative DNA polymerase III, gamma and tau subunits OS=Dehalococcoides mccartyi (strain CBDB1) GN=dnaX PE=4 SV=1	FALSE	0	189.218	56	28	258	28	1	570	62.2	8	High	High	High	High	High	High	High	High	High	Not Found	High	High	8.15494e+06		2.24163e+06	2.1944e+08	1.48382e+08	1.47442e+07	1.8873e+08	1.9282e+08	1.59913e+08		1.27928e+07	6.25862e+07
cbdbA890	Q3ZXQ8	Cobyric acid synthase OS=Dehalococcoides mccartyi (strain CBDB1) GN=cobQ PE=3 SV=1	FALSE	0	188.908	65	27	277	27	1	503	55	5.64	High	High	High	High	High	High	High	High	High	Not Found	High	High	1.37192e+07	1.49746e+07	1.94464e+07	7.59207e+07	9.23358e+07	3.78076e+07	1.42561e+08	1.33788e+08	1.55009e+08		1.27677e+07	5.57738e+07
cbdbA934	Q3ZXV4	Aspartate-semialdehyde dehydrogenase OS=Dehalococcoides mccartyi (strain CBDB1) GN=asd PE=3 SV=1	FALSE	0	187.618	67	17	331	17	1	338	37.1	6.14	High	High	High	High	High	High	High	High	High	High	High	High	2.75387e+07	3.95422e+07	2.83158e+07	1.9685e+08	2.02456e+08	1.94055e+07	3.90758e+08	2.50201e+08	5.80586e+08	1.12574e+07	2.25828e+07	1.52717e+08
cbdbA955	Q3ZXX9	50S ribosomal protein L10 OS=Dehalococcoides mccartyi (strain CBDB1) GN=rplJ PE=3 SV=1	FALSE	0	187.336	85	18	335	18	1	176	18.9	9.86	High	High	Not Found	High	High	High	High	High	High	Not Found	High	High	1.77608e+07	4.02321e+07		1.06167e+09	1.03275e+09	3.8491e+07	3.86827e+08	4.35474e+08	1.4762e+08		1.56316e+07	2.57318e+08
cbdbA474	Q3ZZN9	Phosphoglucomutase OS=Dehalococcoides mccartyi (strain CBDB1) GN=cbdbA474 PE=3 SV=1	FALSE	0	186.956	61	29	273	29	1	471	51.5	5.47	High	High	High	High	High	High	High	High	High	Not Found	High	High	1.58267e+07	3.6238e+07	6.22104e+07	1.71933e+08	1.06167e+08	6.93984e+07	1.11431e+08	9.36096e+07	1.52602e+08		5.34458e+07	7.1703e+07
cbdbA1316	Q3ZYP4	Glutamate--tRNA ligase OS=Dehalococcoides mccartyi (strain CBDB1) GN=gltX PE=3 SV=1	FALSE	0	186.207	56	27	303	27	1	487	55.5	6.61	High	High	High	High	High	High	High	High	High	High	High	High	1.54746e+07	2.39254e+07	2.44271e+07	2.33075e+08	2.65398e+08	8.42372e+07	1.43924e+08	2.59148e+08	1.70788e+08	4.86126e+07	3.06774e+07	6.83811e+07
cbdbA383	Q3ZZH0	Phosphopantothenoylcysteine synthetase/decarboxylase OS=Dehalococcoides mccartyi (strain CBDB1) GN=coaBC PE=4 SV=1	FALSE	0	185.228	60	22	249	22	1	393	42	6.43	Not Found	High	High	High	High	High	High	High	High	High	High	High		8.45555e+06	2.68358e+07	4.38645e+07	1.20726e+08	1.42068e+07	1.19149e+08	1.2857e+08	1.42733e+08	4.94644e+06	9.58708e+06	7.82826e+07
cbdbA864	Q3ZXN1	Uncharacterized protein OS=Dehalococcoides mccartyi (strain CBDB1) GN=cbdbA864 PE=4 SV=1	FALSE	0	184.885	86	23	232	23	1	231	26.6	4.91	High	High	High	High	High	High	High	High	High	Not Found	High	High	2.21695e+07	4.34915e+07	2.26743e+07	1.48233e+08	1.82176e+08	5.56996e+07	2.41354e+08	2.026e+08	2.96699e+08		3.52417e+07	64896370
cbdbA1353	Q3ZYV6	Ornithine carbamoyltransferase OS=Dehalococcoides mccartyi (strain CBDB1) GN=argF PE=3 SV=1	FALSE	0	184.147	70	22	345	22	1	311	34	5.36	High	High	High	High	High	High	High	High	High	High	High	High	4.51968e+07	5.22723e+07	6.541e+07	1.60233e+08	1.87361e+08	87738750	1.42474e+08	119635843	3.67055e+08	1.87629e+07	7.14574e+07	1.14631e+08
cbdbA1601	Q3ZVX6	Sensor histidine kinase/response regulator OS=Dehalococcoides mccartyi (strain CBDB1) GN=rdhCD PE=4 SV=1	FALSE	0	184.108	27	33	163	31	1	1434	162.4	6.16	High	High	High	High	High	High	High	High	High	Not Found	High	High	1.18859e+06	5.60616e+06	6.94578e+06	2.9648e+07	1.45326e+07	9.90944e+06	4.739e+07	3.29817e+07	3.97116e+07		3.37805e+06	2.9288e+07
cbdbA113	Q3ZWH6	Uncharacterized protein OS=Dehalococcoides mccartyi (strain CBDB1) GN=cbdbA113 PE=4 SV=1	FALSE	0	183.987	60	15	323	15	1	102	11.6	4.7	High	High	High	High	High	High	High	High	High	Not Found	High	High	4.06352e+07	1.72969e+07	4.54174e+06	8.61288e+08	2.4068e+08	1.20685e+08	7.53201e+08	7.36578e+08	2.19153e+09		2.71655e+07	6.37274e+08
cbdbA389	Q3ZZG4	Ribose-phosphate pyrophosphokinase OS=Dehalococcoides mccartyi (strain CBDB1) GN=prs PE=3 SV=1	FALSE	0	183.582	65	25	427	25	1	324	35.7	6.8	High	High	High	High	High	High	High	High	High	High	High	High	8.06035e+07	8.07149e+07	1.44944e+08	2.96182e+08	2.1073e+08	9.87015e+07	2.11616e+08	2.29557e+08	3.69983e+08	6.65571e+07	1.04191e+08	1.55226e+08
cbdbA1123	Q3ZYB3	Homoserine dehydrogenase OS=Dehalococcoides mccartyi (strain CBDB1) GN=metM PE=3 SV=1	FALSE	0	183.528	59	25	350	25	1	433	46.7	6.57	High	High	High	High	High	High	High	High	High	High	High	High	1.04386e+07	2.57843e+07	1.94766e+07	2.19454e+08	3.59762e+08	2.74589e+07	1.89688e+08	3.94266e+08	3.51331e+08	5.65879e+06	3.84555e+07	1.26296e+08
cbdbA749	Q3ZXE1	Phosphomethylpyrimidine synthase OS=Dehalococcoides mccartyi (strain CBDB1) GN=thiC PE=3 SV=1	FALSE	0	183.239	57	27	292	27	1	431	46.3	6.34	High	High	High	High	High	Not Found	High	High	High	Not Found	High	High		4.85168e+07	2.88571e+07	2.4089e+08	2.64993e+08		1.36395e+08	1.1466e+08	1.50193e+08			3.79485e+07
cbdbA1419	Q3ZYZ2	50S ribosomal protein L25 OS=Dehalococcoides mccartyi (strain CBDB1) GN=rplY PE=3 SV=1	FALSE	0	182.609	72	16	384	16	1	218	24.3	6.54	High	High	High	High	High	High	High	High	High	High	High	High	1.67522e+08	4.22746e+07	1.50117e+08	1.42631e+08	1.45798e+08	2.10858e+08	4.98785e+08	4.56452e+08	4.28686e+08	2.48145e+07	1.12275e+08	3.03836e+08
cbdbA46	Q3ZWD5	Glutamate synthase (NADPH), homotetrameric OS=Dehalococcoides mccartyi (strain CBDB1) GN=gltA PE=4 SV=1	FALSE	0	181.608	54	27	239	27	1	465	50.2	7.36	High	High	Not Found	High	High	High	High	High	High	Not Found	High	High	7.92082e+06	1.06645e+07		1.48278e+08	1.25092e+08	1.74491e+07	1.51777e+08	2.32223e+08	264893476		1.99582e+07	3.94646e+07
cbdbA469	Q3ZZP3	50S ribosomal protein L13 OS=Dehalococcoides mccartyi (strain CBDB1) GN=rplM PE=3 SV=1	FALSE	0	181.309	81	18	675	18	1	143	15.9	9.5	High	High	High	High	High	High	High	High	High	High	High	High	3.61584e+07	7.32181e+07	7.75797e+06	3.44066e+09	2.93687e+09	1.53279e+08	8.95928e+08	1648561836	1.80891e+09	5.62678e+07	1.88011e+07	7.45278e+08
cbdbA1284	Q3ZYM5	Glutamyl-tRNA(Gln) amidotransferase subunit A OS=Dehalococcoides mccartyi (strain CBDB1) GN=gatA PE=3 SV=1	FALSE	0	179.975	48	21	256	21	1	486	52.8	6.57	High	High	High	High	High	High	High	High	High	Not Found	High	High	1.10083e+07	8.79642e+06		1.67453e+08	1.84035e+08	2.9601e+07	7.67738e+07	1.12809e+08	8.05516e+07		5.20639e+06	5.33729e+07
cbdbA914	Q3ZXS8	Uncharacterized protein OS=Dehalococcoides mccartyi (strain CBDB1) GN=cbdbA914 PE=4 SV=1	FALSE	0	178.316	62	12	323	12	1	256	27.9	4.64	High	High	Not Found	High	High	High	High	High	High	Not Found	High	High	1.33024e+08	1.53886e+08		5.1389e+08	6.8768e+08	1.57099e+08	4.37438e+08	3.87208e+08	180338066			3.67937e+08
cbdbA425	Q3ZZI6	Chorismate synthase OS=Dehalococcoides mccartyi (strain CBDB1) GN=aroC PE=3 SV=1	FALSE	0	178.043	46	16	619	16	1	364	38.7	7.42	High	High	High	High	High	High	High	High	High	High	High	High	1.11526e+08	1.27447e+08	1.54613e+08	8.14347e+08	8.18411e+08	1.90192e+08	8.15024e+08	7.16027e+08	8.7968e+08	8.41595e+07	5.4342e+07	5.63084e+08
cbdbA7	Q3ZWB6	Histidine--tRNA ligase OS=Dehalococcoides mccartyi (strain CBDB1) GN=hisS PE=3 SV=1	FALSE	0	177.755	56	25	287	25	1	418	46.7	6.46	High	High	High	High	High	High	High	High	High	High	High	High	2.93994e+07	5.41508e+07	2.04573e+07	1.47574e+08	1.79465e+08	6.69719e+07	1.66639e+08	2.14958e+08	2.54488e+08	1.64862e+07	2.49842e+07	1.14511e+08
cbdbA935	Q3ZXV3	4-hydroxy-tetrahydrodipicolinate synthase OS=Dehalococcoides mccartyi (strain CBDB1) GN=dapA PE=3 SV=1	FALSE	0	177.406	56	19	412	19	1	297	32	6.43	High	High	High	High	High	High	High	High	High	High	High	High	8.72201e+07	1.67585e+08	1.19411e+08	3.03502e+08	3.52288e+08	1.16536e+08	3.86328e+08	3.37589e+08	3.15314e+08	5.49931e+07	1.17287e+08	2.08068e+08
cbdbA1669	Q3ZW67	Peroxiredoxin OS=Dehalococcoides mccartyi (strain CBDB1) GN=cbdbA1669 PE=3 SV=1	FALSE	0	177.382	72	16	369	16	1	213	24.1	5.29	High	High	High	High	High	High	High	High	High	High	High	High	6.00734e+07	9.9332e+07	1.36021e+08	1.42856e+08	1.54734e+08	1.32109e+08	2.99296e+08	3.91437e+08	4.79526e+08	5.94789e+07	1.58202e+07	2.62358e+08
cbdbA751	Q3ZXD9	Single-stranded nucleic acid binding R3H domain protein OS=Dehalococcoides mccartyi (strain CBDB1) GN=cbdbA751 PE=4 SV=1	FALSE	0	176.65	53	27	242	27	1	509	56.8	6.99	High	High	High	High	High	High	High	High	High	High	High	High	1.22173e+07	5.62794e+06	1.01406e+07	4.87305e+07	3.22532e+07	1.7958e+07	5.09226e+07	7.58762e+07	6.07982e+07	4.98009e+06	1.23361e+07	6.3045e+07
cbdbA364	Q3ZZD8	Uncharacterized protein OS=Dehalococcoides mccartyi (strain CBDB1) GN=cbdbA364 PE=4 SV=1	FALSE	0	175.652	63	21	283	21	1	183	20.9	5.87	High	High	High	High	High	High	High	High	High	Not Found	High	High	1.3697e+07	1.53092e+07	1.1838e+07	1.99328e+08	4.41368e+08	3.76721e+07	1.71148e+08	1.85891e+08	2.31259e+08		2.82204e+07	8.83375e+07
cbdbA524	Q3ZZV0	Putative exonuclease SbcC OS=Dehalococcoides mccartyi (strain CBDB1) GN=cbdbA524 PE=4 SV=1	FALSE	0	175.5	45	30	171	30	1	859	97.7	5.71	High	Not Found	Not Found	High	High	High	High	High	High	Not Found	Not Found	High	4.38094e+06			3.5526e+07	4.28439e+07	5.2707e+06	4.28534e+07	7.14844e+07	2.27211e+07			1.84097e+07
cbdbA1066	Q3ZY69	Radical SAM domain protein OS=Dehalococcoides mccartyi (strain CBDB1) GN=rdhI PE=4 SV=1	FALSE	0	175.426	66	21	205	21	1	273	31.3	7.11	High	High	High	High	High	High	High	High	High	Not Found	High	High	3.49093e+07	2.7051e+07	1.41938e+07	1.33589e+08	1.46413e+08	3.60962e+07	1.86485e+08	1.43365e+08	2.13397e+08		2.98247e+07	4.23725e+07
cbdbB16	Q3ZX71	Pyruvic-ferredoxin oxidoreductase, gammasubunit OS=Dehalococcoides mccartyi (strain CBDB1) GN=porG PE=4 SV=1	FALSE	0	175.291	83	21	408	21	1	190	20.5	9.5	High	High	High	High	High	High	High	High	High	High	High	High	2.36365e+07	2.84866e+07	3.42877e+07	1.15918e+09	1.30487e+09	4.99419e+07	8.76513e+08	8.7859e+08	9.18676e+08	4.0794e+07	2.93094e+07	2.96905e+08
cbdbA1289	Q3ZYM1	ABC transporter, ATP-binding protein OS=Dehalococcoides mccartyi (strain CBDB1) GN=cbdbA1289 PE=3 SV=1	FALSE	0	174.998	67	21	324	21	1	306	34.2	8.05	High	High	High	High	High	High	High	High	High	High	High	High	2.7856e+07	3.60487e+07	3.87449e+07	1.93019e+08	2.40842e+08	3.3569e+07	9.74824e+07	1.9698e+08	1.12999e+08	5.32395e+07	3.56395e+07	1.03247e+08
cbdbA372	Q3ZZH8	DegV family protein OS=Dehalococcoides mccartyi (strain CBDB1) GN=degV PE=4 SV=1	FALSE	0	174.598	90	21	599	21	1	279	29.7	8.51	High	High	High	High	High	High	High	High	High	High	High	High	7.12618e+07	6.6669e+07	1.39684e+07	1.19909e+09	1.38513e+09	1.2608e+08	1.55262e+09	7.01698e+08	7.89368e+08	2.17703e+07	8.88138e+07	4.38743e+08
cbdbA411	Q3ZZJ5	Putative fumarate hydratase, alpha subunit OS=Dehalococcoides mccartyi (strain CBDB1) GN=cbdbA411 PE=4 SV=1	FALSE	0	173.469	78	23	219	23	1	280	29.7	6.95	High	High	High	High	High	High	High	High	High	High	High	High	1.49109e+07	1.17336e+07	3.84626e+07	9.76566e+07	6.86293e+07	1.01604e+07	4.77798e+07	5.29999e+07	7.32256e+07	2.61948e+07	1.12044e+07	4.59103e+07
cbdbA773	Q3ZXG8	ABC transporter, ATP-binding protein OS=Dehalococcoides mccartyi (strain CBDB1) GN=cbdbA773 PE=3 SV=1	FALSE	0	173.197	65	24	299	24	1	305	33.7	6.06	High	High	High	High	High	High	High	High	High	High	High	High	6.50002e+06	4.09701e+06	1.06588e+07	2.05475e+08	1.88614e+08	6494173	1.21085e+08	1.66621e+08	8.44077e+07	1.22703e+07	1.68647e+06	5.72472e+07
cbdbA1025	Q3ZY08	Putative cell division protein OS=Dehalococcoides mccartyi (strain CBDB1) GN=cbdbA1025 PE=4 SV=1	FALSE	0	172.829	63	25	280	25	1	379	41.6	8.1	High	High	Not Found	High	High	High	High	High	High	Not Found	High	High	1.17642e+07	6.73893e+06		9.79182e+07	1.22435e+08	2.29981e+07	9.26381e+07	6.99615e+07	8.63981e+07		1.81814e+07	5.84986e+07
cbdbA1338	Q3ZYS2	L-aspartate oxidase OS=Dehalococcoides mccartyi (strain CBDB1) GN=nabD PE=4 SV=1	FALSE	0	172.693	61	29	196	29	1	515	56.4	6.14	High	High	High	High	High	High	High	High	High	High	High	High	1.35729e+07	7.49048e+06	1.24155e+07	5.16284e+07	2.06319e+07	1.47826e+07	2.32689e+07	8.69716e+07	7.89243e+07	6.11171e+06	4.88426e+06	4.50429e+07
cbdbA1105	Q3ZY82	Riboflavin biosynthesis protein RibD OS=Dehalococcoides mccartyi (strain CBDB1) GN=ribD PE=3 SV=1	FALSE	0	171.233	74	24	277	24	1	365	38.8	7.28	High	High	High	High	High	High	High	High	High	High	High	High	4.70841e+07	2.47455e+07	1.49271e+07	2.02845e+08	2.40588e+08	2.74361e+07	1.29253e+08	1.37506e+08	1.3202e+08	3.28796e+07	4.87297e+07	1.04282e+08
cbdbA1331	Q3ZYS8	Uncharacterized protein OS=Dehalococcoides mccartyi (strain CBDB1) GN=cbdbA1331 PE=4 SV=1	FALSE	0	171.078	76	17	327	17	1	136	15.1	5.44	Not Found	High	Not Found	High	High	High	High	High	High	Not Found	High	High		1.10968e+07		9.17119e+08	4.46357e+08	2.81959e+06	5.98841e+08	6.87427e+08	1.09893e+09		6.99202e+06	2.86857e+08
cbdbA951	Q3ZXW3	Acetyltransferase, GNAT family OS=Dehalococcoides mccartyi (strain CBDB1) GN=cbdbA951 PE=4 SV=1	FALSE	0	170.909	57	19	380	19	1	291	32.4	5.49	High	Not Found	High	High	High	High	High	High	High	Not Found	High	High	3.3131e+06		6.65907e+06	5.91708e+08	3.49493e+08	5.04393e+06	4.07551e+08	4.43469e+08	8.51748e+08		3.06715e+06	1.63594e+08
cbdbA896	Q3ZXQ2	Putative branched-chain amino acid ABC transporter,periplasmic amino acid-binding protein OS=Dehalococcoides mccartyi (strain CBDB1) GN=cbdbA896 PE=4 SV=1	FALSE	0	169.922	46	18	296	17	1	428	46.8	5.02	High	High	High	High	High	High	High	High	High	High	High	High	2.84236e+07	41373860	3.41628e+07	1.69361e+08	1.84315e+08	4.11451e+07	5.21924e+07	1.53034e+08	8.61654e+07	2.86819e+07	6.18436e+07	1.03844e+08
cbdbA1110	Q3ZY77	DNA mismatch repair protein MutL OS=Dehalococcoides mccartyi (strain CBDB1) GN=mutL PE=3 SV=1	FALSE	0	169.893	56	29	185	29	1	566	62.2	7.17	High	High	Not Found	High	High	High	High	High	High	Not Found	High	High	5.56269e+06	2.4747e+06		5.12085e+07	5.49352e+07	8.61412e+06	1.6998e+07	57128030	4.66952e+07		2.82614e+07	3.32627e+07
cbdbA1183	Q3ZYG0	Argininosuccinate synthase OS=Dehalococcoides mccartyi (strain CBDB1) GN=argG PE=3 SV=1	FALSE	0	169.175	60	22	468	22	1	406	45.1	6.1	High	High	High	High	High	High	High	High	High	High	High	High	1.07178e+08	1.48941e+08	1.03038e+08	1.38578e+09	1.83541e+09	1.88197e+08	7.41657e+08	9.32851e+08	9.86747e+08	9.5185e+07	7.7523e+07	4.69089e+08
cbdbA515	Q3ZZV8	50S ribosomal protein L9 OS=Dehalococcoides mccartyi (strain CBDB1) GN=rplI PE=3 SV=1	FALSE	0	168.252	83	21	329	21	1	151	16.5	9.5	High	High	High	High	High	High	High	High	High	Not Found	High	High	1.6178e+07	3.57572e+07	3.15291e+07	6.41466e+08	7.1022e+08	2.86281e+07	2.72674e+08	3.59971e+08	9.32854e+08		2.63016e+07	2.1236e+08
cbdbA850	Q3ZXP4	Hydrogenase, group 4, EchE subunit OS=Dehalococcoides mccartyi (strain CBDB1) GN=cbdbA850 PE=4 SV=1	FALSE	0	167.058	60	25	324	25	1	359	39.8	6.19	High	High	High	High	High	High	High	High	High	Not Found	High	High	7.47088e+06	1.17321e+07	1.97826e+07	4.05567e+08	5.41026e+08	4.88836e+06	2.27788e+08	2.90272e+08	2.83174e+08		4.20332e+07	1.4697e+08
cbdbA772	Q3ZXG9	ABC transporter associated protein with signal peptide, putative periplasmic substrate binding subunit OS=Dehalococcoides mccartyi (strain CBDB1) GN=cbdbA772 PE=4 SV=1	FALSE	0	166.697	63	14	280	14	1	243	27.9	5.2	Not Found	High	Not Found	High	High	Not Found	High	High	High	Not Found	Not Found	High				4.02184e+08	3.6852e+08		3.6693e+08	4.04772e+08	2.11148e+08			1.24102e+08
cbdbA743	Q3ZXE6	Transcription elongation factor GreA OS=Dehalococcoides mccartyi (strain CBDB1) GN=greA PE=3 SV=1	FALSE	0	166.56	69	18	185	18	1	170	19	8.53	Not Found	Not Found	Not Found	High	High	Not Found	High	High	High	Not Found	Not Found	High				2.95195e+08	3.11777e+08		1.5811e+08	1.31189e+08	4.40685e+07			3.16621e+07
cbdbA825	Q3ZXL8	Histidinol-phosphate aminotransferase OS=Dehalococcoides mccartyi (strain CBDB1) GN=hisC PE=3 SV=1	FALSE	0	166.488	65	20	248	20	1	358	40.2	7.15	High	High	Not Found	High	High	High	High	High	High	High	High	High	2.04412e+07	2.07526e+07		1.92592e+08	1.75193e+08	8.31448e+06	1.4712e+08	1.81039e+08	6.90139e+07	6.78386e+06	5.83393e+06	8.29899e+07
cbdbA1489	Q3ZZ67	Uncharacterized protein OS=Dehalococcoides mccartyi (strain CBDB1) GN=cbdbA1489 PE=4 SV=1	FALSE	0	166.064	80	22	386	22	1	255	29.6	6.18	High	High	High	High	High	High	High	High	High	High	High	High	5.05034e+07	77996323	7.39165e+07	5.5354e+08	6.43001e+08	5.75944e+07	4.71949e+08	5.47641e+08	7.75385e+08	7.12686e+07	4.38535e+07	1.6368e+08
cbdbA1127	Q3ZYA9	Peptide chain release factor 1 OS=Dehalococcoides mccartyi (strain CBDB1) GN=prfA PE=3 SV=1	FALSE	0	165.482	53	21	205	21	1	355	40.6	5.25	High	Not Found	High	High	High	High	High	High	High	Not Found	Not Found	High	2.32373e+06		6.49957e+06	2.8253e+08	2.01823e+08	6.8806e+06	1.79027e+08	1.95737e+08	2.25212e+08			5.93982e+07
cbdbA645	Q3ZX50	Thioredoxin OS=Dehalococcoides mccartyi (strain CBDB1) GN=trx PE=3 SV=1	FALSE	0	165.101	94	13	469	13	1	107	11.9	8.27	High	High	High	High	High	High	High	High	High	High	High	High	2.22463e+08	3.78387e+08	8.23788e+07	1.05926e+09	2.69442e+09	4.74097e+08	1.81255e+09	1.84488e+09	4.26421e+09	3.94762e+07	2.86365e+08	1.08129e+09
cbdbA1133	Q3ZYA4	Tyrosine recombinase XerC OS=Dehalococcoides mccartyi (strain CBDB1) GN=xerD PE=3 SV=1	FALSE	0	163.568	67	23	345	23	1	302	34.3	9.39	High	High	High	High	High	High	High	High	High	High	High	High	3.48499e+07	3.78213e+07	1.31609e+07	3.97591e+08	3.05293e+08	6.92002e+07	2.3919e+08	2.02506e+08	1.89702e+08	1.36766e+07	6.78777e+07	1.17179e+08
cbdbA219	Q3ZWT8	L-lysine 2,3-aminomutase homologe, probable frameshift OS=Dehalococcoides mccartyi (strain CBDB1) GN=kamA PE=4 SV=1	FALSE	0	161.689	42	25	119	25	1	708	79.8	8.12	High	High	High	High	High	High	High	High	High	Not Found	High	High	3.71743e+07	5.89734e+07	1.06323e+07	1.99016e+07	3.09091e+07	3.07638e+07	3.16904e+07	5.08267e+07	1.80493e+07		1.32519e+07	1.03943e+07
cbdbA435	Q3ZZM7	30S ribosomal protein S7 OS=Dehalococcoides mccartyi (strain CBDB1) GN=rpsG PE=3 SV=1	FALSE	0	161.625	67	15	591	15	1	156	17.9	10.59	High	High	High	High	High	High	High	High	High	High	High	High	9.40268e+07	1.66395e+08	1.29923e+08	2.43473e+09	1.8276e+09	1.87246e+08	1.22952e+09	1.64546e+09	2.04804e+09	8.18899e+07	2.50075e+08	5.64199e+08
cbdbA1715	Q3ZW71	ABC transporter, ATP-binding protein OS=Dehalococcoides mccartyi (strain CBDB1) GN=cbdbA1715 PE=4 SV=1	FALSE	0	160.746	57	21	187	21	1	313	34.5	6.07	High	High	Not Found	High	High	High	High	High	High	Not Found	High	High	1.56698e+07	5.18041e+06		2.80125e+08	2.8772e+08	6.72715e+06	1.31501e+08	5.22055e+07	3.20337e+08		1.38417e+07	5.16202e+07
cbdbA656	Q3ZX43	Bifunctional protein FolD OS=Dehalococcoides mccartyi (strain CBDB1) GN=folD PE=3 SV=1	FALSE	0	160.479	67	16	301	16	1	296	31.3	7.18	High	High	High	High	High	High	High	High	High	High	High	High	7.00137e+07	1.07727e+08	4.98678e+07	3.07814e+08	3.67003e+08	1.34328e+08	1.67719e+08	2.81424e+08	1.53535e+08	3.50879e+07	1.06113e+08	1.85961e+08
cbdbA720	Q3ZXC2	1-deoxy-D-xylulose-5-phosphate synthase OS=Dehalococcoides mccartyi (strain CBDB1) GN=dxs PE=3 SV=1	FALSE	0	160.361	38	21	208	21	1	647	70	7.03	High	High	High	High	High	High	High	High	High	Not Found	High	High	4.33958e+07		1.86428e+07	8.53558e+07	9.15927e+07	2.23765e+07	6.22772e+07	7.16169e+07	3.34463e+07		1.55563e+07	4.08791e+07
cbdbA1245	Q3ZYL0	Uncharacterized protein OS=Dehalococcoides mccartyi (strain CBDB1) GN=cbdbA1245 PE=4 SV=1	FALSE	0	160.093	96	20	523	20	1	115	13.1	8.29	High	High	High	High	High	High	High	High	High	High	High	High	1.98711e+08	7.27053e+07	1.81752e+08	1.44474e+09	1.76703e+09	8.14669e+07	1.63059e+09	1.27875e+09	1.64931e+09	1.43341e+08	2.83164e+07	5.90615e+08
cbdbA647	Q3ZX48	DNA-binding response regulator, LuxR family OS=Dehalococcoides mccartyi (strain CBDB1) GN=cbdbA647 PE=4 SV=1	FALSE	0	159.307	75	21	285	21	1	224	24.8	5.99	High	High	High	High	High	High	High	High	High	Not Found	High	High	3.44125e+07	1.65184e+07	2.93956e+07	1.33146e+08	1.03336e+08	7.77177e+07	1.41271e+08	1.3951e+08	1.70972e+08		2.64469e+06	6.54138e+07
cbdbA606	Q3ZX30	Radical SAM domain protein OS=Dehalococcoides mccartyi (strain CBDB1) GN=rdhI PE=4 SV=1	FALSE	0	159.222	82	21	209	21	1	249	28.7	5.54	High	High	High	High	High	High	High	High	High	Not Found	High	High	6.36847e+06	1.17364e+07	2.91935e+07	5.59497e+08	5.68507e+08	1.5368e+07	2.1723e+08	3.85138e+08	5.50068e+08		3.41088e+07	1.55184e+08
cbdbA769	Q3ZXH1	Adenine deaminase OS=Dehalococcoides mccartyi (strain CBDB1) GN=ade PE=3 SV=1	FALSE	0	158.708	38	21	229	21	1	571	61.4	6.01	High	High	High	High	High	High	High	High	High	Not Found	High	High	2.08037e+07	9.43283e+06	5.19957e+06	7.86005e+07	1.08382e+08	8.95446e+07	7.05136e+07	6.92764e+07	1.51856e+08		3.61849e+06	3.99321e+07
cbdbA1111	Q3ZY76	ATP-dependent DNA helicase PcrA OS=Dehalococcoides mccartyi (strain CBDB1) GN=pcrA PE=4 SV=1	FALSE	0	158.454	45	31	194	31	1	738	83.1	7.02	Not Found	High	Not Found	High	High	High	High	High	High	Not Found	Not Found	High		1.23149e+07		9.04855e+07	56961792	1.30169e+07	7.81355e+07	6.32493e+07	2.99163e+07			2.35587e+07
cbdbA1234	Q3ZYH2	DNA-binding response regulator OS=Dehalococcoides mccartyi (strain CBDB1) GN=cbdbA1234 PE=4 SV=1	FALSE	0	157.755	77	14	317	14	1	180	20.3	7.4	High	High	High	High	High	High	High	High	High	High	High	High	4.72398e+07	7.26573e+07	8.00294e+06	2.03885e+08	3.43935e+08	5.59265e+07	2.63853e+08	2.2588e+08	2.58589e+08	1.204e+07	4.78935e+07	9.0442e+07
cbdbA691	Q3ZXA3	GTPase HflX OS=Dehalococcoides mccartyi (strain CBDB1) GN=hflX PE=3 SV=1	FALSE	0	157.63	61	22	193	22	1	382	42.8	6.81	High	High	High	High	High	High	High	High	High	Not Found	Not Found	High	3.68405e+06	1.16819e+07	1.74648e+07	1.45959e+08	9.61858e+07	1.14993e+07	9.69139e+07	1.01036e+08	1.13721e+08			4.53897e+07
cbdbA812	Q3ZXI1	Acetolactate synthase, small subunit OS=Dehalococcoides mccartyi (strain CBDB1) GN=ilvN PE=4 SV=1	FALSE	0	156.941	82	17	338	17	1	178	19.6	9.31	High	High	High	High	High	High	High	High	High	High	High	High	5.3845e+07	9.77631e+07	4.88702e+07	4.85295e+08	324138451	1.24009e+08	2.95256e+08	2.21504e+08	3.93719e+08	1.8037e+07	8.79254e+07	2.78954e+08
cbdbA343	Q3ZZF6	Nucleoside diphosphate kinase OS=Dehalococcoides mccartyi (strain CBDB1) GN=ndk PE=3 SV=1	FALSE	0	156.661	73	11	463	11	1	142	15.7	7.58	High	High	High	High	High	High	High	High	High	High	High	High	4.57519e+07	3.83897e+07	7.68119e+07	8.25039e+08	735547376	6.58736e+07	4.78448e+08	4.86504e+08	7.65421e+08	4.09043e+07	6.40057e+07	4.48592e+08
cbdbA1181	Q3ZYG2	Acetylornithine aminotransferase OS=Dehalococcoides mccartyi (strain CBDB1) GN=argD PE=3 SV=1	FALSE	0	155.685	67	20	220	20	1	398	43	7.02	High	High	High	High	High	High	High	High	High	High	High	High	6.7704e+06	2.30438e+07	1.25237e+07	2.01835e+08	1.54296e+08	1.06791e+07	1.38236e+08	1.46611e+08	2.09245e+08	1.20674e+07	7.64053e+06	4.28388e+07
cbdbA1450	Q3ZZ11	Tryptophan synthase beta chain OS=Dehalococcoides mccartyi (strain CBDB1) GN=trpB PE=3 SV=1	FALSE	0	155.062	51	21	256	21	1	399	42.9	7.58	High	High	High	High	High	High	High	High	High	High	High	High	7.16028e+07	5.49035e+07	1.49712e+08	2.44114e+08	3.1236e+08	7.87345e+07	1.66108e+08	1.7875e+08	3.10374e+08	5.97208e+07	5.79071e+07	1.37468e+08
cbdbA486	Q3ZZS9	Putative daunorubicin resistance ABC transporter, ATP-binding protein OS=Dehalococcoides mccartyi (strain CBDB1) GN=cbdbA486 PE=4 SV=1	FALSE	0	154.787	76	23	224	23	1	316	35	7.24	High	High	High	High	High	High	High	High	High	Not Found	High	High	7.62392e+06	2.20245e+07	2.55901e+07	9.03937e+07	138584746	3.44507e+07	9.94676e+07	8.22997e+07	3.04718e+08		3.05419e+07	4.25946e+07
cbdbA1015	Q3ZY18	Putative inner membrane protein, 60 kDa OS=Dehalococcoides mccartyi (strain CBDB1) GN=cbdbA1015 PE=3 SV=1	FALSE	0	154.75	23	15	227	15	1	315	35.6	9.66	Not Found	High	Not Found	High	High	High	High	High	High	Not Found	High	High		8.63111e+06		2.77843e+08	2.45197e+08	2.06655e+07	2.36773e+08	3.90892e+07	1.89473e+08		1.52334e+07	1.23176e+08
cbdbA1117	Q3ZYB8	Carbamoyl-phosphate synthase small chain OS=Dehalococcoides mccartyi (strain CBDB1) GN=carA PE=3 SV=1	FALSE	0	154.721	61	20	296	20	1	364	40.2	7.96	High	High	High	High	High	High	High	High	High	High	High	High	34658938	6.7537e+06	3.33893e+07	1.03413e+08	1.68937e+08	1.81299e+07	1.24967e+08	2.11341e+08	1.17804e+08		2.10114e+07	7.69876e+07
cbdbA278	Q3ZZA7	50S ribosomal protein L19 OS=Dehalococcoides mccartyi (strain CBDB1) GN=rplS PE=3 SV=1	FALSE	0	154.121	77	15	384	15	1	131	14.8	9.88	High	High	High	High	High	High	High	High	High	High	High	High	5.63871e+07	1.28955e+08	1.44287e+08	1.44e+09	1.22817e+09	1.07473e+08	5.63751e+08	7.76632e+08	1.49262e+09	9.71195e+07	1.35045e+08	4.34079e+08
cbdbA1256	Q3ZYJ9	UPF0234 protein cbdbA1256 OS=Dehalococcoides mccartyi (strain CBDB1) GN=cbdbA1256 PE=3 SV=1	FALSE	0	153.852	74	17	327	17	1	163	18.5	7.14	High	High	High	High	High	High	High	High	High	High	High	High	7.77741e+06	2.15426e+07	3.02087e+07	6.11129e+08	6.01218e+08	1.76078e+07	3.35977e+08	2.66469e+08	8.04991e+08	1.62579e+07	1.24347e+07	1.95297e+08
cbdbA714	Q3ZXC8	LL-diaminopimelate aminotransferase OS=Dehalococcoides mccartyi (strain CBDB1) GN=dapL PE=3 SV=1	FALSE	0	152.764	47	20	281	20	1	388	42.3	7.8	High	High	Not Found	High	High	High	High	High	High	Not Found	High	High	4.80233e+06	9.39635e+07		3.17179e+08	4.10458e+08	1.15262e+07	2.89791e+08	2.43099e+08	3.51287e+08		1.32239e+07	1.79364e+08
cbdbA1465	Q3ZZ42	Uncharacterized protein OS=Dehalococcoides mccartyi (strain CBDB1) GN=cbdbA1465 PE=4 SV=1	FALSE	0	151.496	59	16	212	16	1	273	31.1	5.92	High	High	High	High	High	High	High	High	High	High	High	High	7.21672e+07	9.71514e+07	8.99782e+07	5.29959e+08	6.46002e+08	1.07351e+08	1.39512e+08	3.88803e+08	9.10743e+07	1.06086e+07	8.13303e+07	1.64183e+08
cbdbA1016	Q3ZY17	Uncharacterized protein OS=Dehalococcoides mccartyi (strain CBDB1) GN=cbdbA1016 PE=4 SV=1	FALSE	0	151.327	60	18	327	18	1	371	39.5	5.36	High	High	High	High	High	High	High	High	High	Not Found	High	High	8.38683e+06	1.23952e+07	4688745	7.16568e+08	6.91404e+08	1.58905e+07	4.60335e+08	4.54911e+08	1.06727e+08		1.61471e+07	1.98955e+08
cbdbA440	Q3ZZM3	50S ribosomal protein L4 OS=Dehalococcoides mccartyi (strain CBDB1) GN=rplD PE=3 SV=1	FALSE	0	151.237	76	17	530	17	1	210	23.3	10.04	High	High	High	High	High	High	High	High	High	High	High	High	2.27498e+07	3.57267e+07	1.13254e+08	1.69061e+09	1.2851e+09	3.61493e+07	1.11748e+09	9.33193e+08	9.62531e+08	8.5519e+07	1.17171e+08	3.35726e+08
cbdbA1291	Q3ZYL9	Transcriptional regulator, AsnC family OS=Dehalococcoides mccartyi (strain CBDB1) GN=cbdbA1291 PE=4 SV=1	FALSE	0	150.873	84	16	327	16	1	160	18	5.26	Not Found	High	High	High	High	High	High	High	High	Not Found	High	High		2.9764e+07	4.96748e+06	6.00134e+08	4.58766e+08	3.47139e+07	2.95219e+08	6.05928e+08	7.78899e+08		1.06541e+07	2.31782e+08
cbdbA1675	Q3ZW63	LemA family protein OS=Dehalococcoides mccartyi (strain CBDB1) GN=cbdbA1675 PE=4 SV=1	FALSE	0	150.674	77	16	451	16	1	188	21.3	8.85	High	High	High	High	High	High	High	High	High	High	High	High	2.70659e+07	2.86667e+07	2.94026e+07	9.55683e+08	6.50832e+08	5.74779e+07	4.82477e+08	6.6899e+08	7.00821e+08	2.39543e+07	4.874e+07	3.54084e+08
cbdbA565	Q3ZWW9	Uncharacterized protein OS=Dehalococcoides mccartyi (strain CBDB1) GN=cbdbA565 PE=4 SV=1	FALSE	0	150.479	80	12	280	12	1	140	15.2	5.1	High	High	High	High	High	High	High	High	High	High	High	High	6.5671e+07	1.26591e+08	3.57303e+07	4.08048e+08	5.5107e+08	9.66457e+07	4.04552e+08	4.90898e+08	1.93804e+08	3.08237e+07	1.24199e+08	3.71938e+08
cbdbA1018	Q3ZY14	30S ribosomal protein S18 OS=Dehalococcoides mccartyi (strain CBDB1) GN=rpsR PE=3 SV=1	FALSE	0	150.117	65	18	469	18	1	147	16.5	10.45	High	High	High	High	High	High	High	High	High	High	High	High	1.79258e+08	2.55325e+08	7.04359e+07	1.29882e+09	2.02864e+09	1.24704e+08	6.65101e+08	4.98466e+08	1.72616e+09	4.38868e+07	1.92499e+08	3.99493e+08
cbdbA861	Q3ZXN4	Aminopeptidase protein OS=Dehalococcoides mccartyi (strain CBDB1) GN=cbdbA861 PE=4 SV=1	FALSE	0	150.062	49	19	285	19	1	369	41.5	5.53	High	High	High	High	High	High	High	High	High	High	High	High	1.42667e+08	6.92776e+07	9.43095e+07	2.36919e+08	2.20126e+08	304492034	3.69362e+08	2.64252e+08	5.48102e+08	1.89194e+07	9.62164e+07	2.25612e+08
cbdbA170	Q3ZWN0	Putative [Fe] hydrogenase, HymB subunit OS=Dehalococcoides mccartyi (strain CBDB1) GN=hymB PE=4 SV=1	FALSE	0	149.891	42	21	350	21	1	417	45.2	6.46	High	High	High	High	High	High	High	High	High	High	High	High	5.30003e+07	2.42532e+07	1.24803e+07	4.30685e+08	4.18595e+08	4.8293e+07	2.70546e+08	4.43248e+08	4.49982e+08	2.23899e+06	2.0634e+07	2.06625e+08
cbdbA530	Q3ZZU5	Uncharacterized protein OS=Dehalococcoides mccartyi (strain CBDB1) GN=cbdbA530 PE=4 SV=1	FALSE	0	149.37	68	15	329	15	1	189	21.2	4.94	High	High	Not Found	High	High	High	High	High	High	Not Found	Not Found	High	1.04576e+07	2.56064e+07		4.09928e+08	8.68675e+08	1.74531e+07	6.48406e+08	2.35312e+08	1.79559e+08			1.21088e+08
cbdbA535	Q3ZZU0	ATP synthase subunit delta OS=Dehalococcoides mccartyi (strain CBDB1) GN=atpH PE=3 SV=1	FALSE	0	149.122	83	20	368	20	1	180	19.9	9.36	High	High	High	High	High	High	High	High	High	High	High	High	2.1716e+07	5.76114e+07	4.28817e+07	1.19559e+09	7.25338e+08	4.25998e+07	2.8944e+08	7.934e+08	8.28511e+08	3.11526e+07	3.71182e+07	2.84566e+08
cbdbA455	Q3ZZQ7	30S ribosomal protein S5 OS=Dehalococcoides mccartyi (strain CBDB1) GN=rpsE PE=3 SV=1	FALSE	0	148.704	76	17	401	17	1	172	17.8	10.26	High	High	High	High	High	High	High	High	High	High	High	High	1.81146e+08	2.38705e+08	1.47898e+08	1.25147e+09	1.48179e+09	2.73319e+08	7.45877e+08	4.38695e+08	1.00583e+09	3.55837e+06	2.26672e+08	6.02541e+08
cbdbA1058	Q3ZY28	Glutamine amidotransferase, class II OS=Dehalococcoides mccartyi (strain CBDB1) GN=cbdbA1058 PE=4 SV=1	FALSE	0	148.377	47	21	302	21	1	376	42.3	6.47	High	High	High	High	High	High	High	High	High	High	High	High	4.97184e+07	8.1245e+07	5.00469e+07	3.42402e+08	3.73281e+08	1.10488e+08	1.33414e+08	1.57142e+08	2.14785e+08	3.23795e+07	1.07662e+08	1.0891e+08
cbdbA478	Q3ZZN5	Uncharacterized protein OS=Dehalococcoides mccartyi (strain CBDB1) GN=cbdbA478 PE=4 SV=1	FALSE	0	148.13	49	24	127	24	1	520	59.3	7.23	High	High	High	High	High	High	High	High	High	Not Found	High	High	1.98448e+07	5.70021e+06	9.85887e+06	6.38537e+07	1.39467e+08	1.82155e+07	2.84075e+07	4.30459e+07	3.52065e+07		2.01394e+06	2.21067e+07
cbdbA427	Q3ZZI5	3-phosphoshikimate 1-carboxyvinyltransferase OS=Dehalococcoides mccartyi (strain CBDB1) GN=aroA PE=3 SV=1	FALSE	0	147.482	61	17	266	17	1	420	45	6.6	High	High	High	High	High	High	High	High	High	Not Found	High	High	5.67902e+07	6.74321e+07	1.77105e+07	4.23871e+08	4.32641e+08	1.18977e+08	4.72198e+08	4.97025e+08	7.67861e+08		5.12047e+07	2.33956e+08
cbdbA848	Q3ZXP6	Hydrogenase subunit HymC OS=Dehalococcoides mccartyi (strain CBDB1) GN=cbdbA848 PE=4 SV=1	FALSE	0	147.05	72	19	298	19	1	197	21.7	7.47	High	High	High	High	High	High	High	High	High	High	High	High	4.28783e+07	3.3312e+07	5.40518e+07	4.69996e+08	5.04681e+08	5.1392e+07	2.77063e+08	3.47201e+08	4.16295e+08	2.60194e+07	5.54352e+07	1.2314e+08
cbdbA1137	Q3ZYA0	DNA mismatch repair protein MutS OS=Dehalococcoides mccartyi (strain CBDB1) GN=mutS PE=3 SV=1	FALSE	0	146.943	35	25	163	25	1	858	95.6	6.35	High	High	Not Found	High	High	High	High	High	High	Not Found	High	High	6.05797e+06	6.98907e+06		6.12567e+07	7.97087e+07	1.69858e+07	8.24363e+07	8.58603e+07	5.9749e+07		3.89509e+06	2.74148e+07
cbdbA1326	Q3ZYT2	Putative dnaK suppressor protein OS=Dehalococcoides mccartyi (strain CBDB1) GN=cbdbA1326 PE=4 SV=1	FALSE	0	146.593	79	15	207	15	1	123	14	6.68	High	Not Found	High	High	High	High	High	High	High	High	High	High	5.69777e+06		1.09594e+07	2.48997e+08	2.46673e+08	7.58191e+06	2.87032e+08	2.80911e+08	6.82147e+08	7.63968e+06	3.67096e+06	1.20873e+08
cbdbA895	Q3ZXQ3	Branched chain amino acid ABC transporter,ATP-binding protein OS=Dehalococcoides mccartyi (strain CBDB1) GN=cbdbA895 PE=3 SV=1	FALSE	0	145.887	75	15	173	15	1	263	29.5	8.88	High	High	High	High	High	High	High	High	High	Not Found	High	High	2.58263e+07	2.1203e+07	1.09672e+07	1.09889e+08	1.3602e+08	3.69804e+07	6.91919e+07	5.55376e+07	8.022e+07		1.72592e+07	2.92544e+07
cbdbA1519	Q3ZZ80	Putative CRISPR-associated protein OS=Dehalococcoides mccartyi (strain CBDB1) GN=cbdbA1519 PE=4 SV=1	FALSE	0	145.804	68	14	202	14	1	209	23.4	9.41	High	High	Not Found	High	High	High	High	High	High	Not Found	Not Found	High	8.12224e+06	1.60951e+07		1.42666e+08	2.34346e+08	2.61277e+07	1.44572e+08	1.88412e+08	1.59207e+08			4.83521e+07
cbdbA1310	Q3ZYP9	Twitching mobility protein OS=Dehalococcoides mccartyi (strain CBDB1) GN=pilT PE=4 SV=1	FALSE	0	145.773	66	20	225	20	1	371	41.3	6.16	High	High	High	High	High	High	High	High	High	High	High	High	1.39809e+07	1.36026e+07	1.80428e+07	9.14503e+07	1.10226e+08	2.31283e+07	6.07486e+07	41477428	9.83157e+07	7.46679e+06	3.24736e+07	4.06165e+07
cbdbA1372	Q3ZYU0	Chaperone protein DnaJ OS=Dehalococcoides mccartyi (strain CBDB1) GN=dnaJ PE=3 SV=1	FALSE	0	145.094	60	22	151	22	1	330	36.3	8.82	Not Found	Not Found	Not Found	High	High	Not Found	High	High	High	Not Found	Not Found	High				4.03178e+07	5.82788e+07		4.81149e+07	6.47276e+07	1.24615e+08			1.71899e+07
cbdbA1677	Q3ZW62	Protease HtpX homolog OS=Dehalococcoides mccartyi (strain CBDB1) GN=htpX PE=3 SV=1	FALSE	0	145.017	57	22	177	22	1	397	43.2	8.07	High	High	Not Found	High	High	High	High	High	High	Not Found	Not Found	High	6.81208e+06	7880997		9.7243e+07	2.01825e+08	6.90438e+06	143633345	6.04574e+07	3.38387e+07			5.36218e+07
cbdbA459	Q3ZZQ3	Adenylate kinase OS=Dehalococcoides mccartyi (strain CBDB1) GN=adk PE=3 SV=1	FALSE	0	144.221	75	18	247	18	1	216	23.6	7.91	High	High	Not Found	High	High	High	High	High	High	Not Found	High	High	3.89935e+06	7.29745e+06		2.21985e+08	1.92502e+08	7.55789e+06	8.5962e+07	1.17069e+08	1.45258e+08		966392	9.69458e+07
cbdbA1385	Q3ZYX5	tRNA(Ile)-lysidine synthase OS=Dehalococcoides mccartyi (strain CBDB1) GN=tilS PE=3 SV=1	FALSE	0	143.656	47	21	234	21	1	471	53	6.42	High	High	High	High	High	High	High	High	High	High	High	High	1.67636e+07	2.97011e+07	2.98499e+07	1.15909e+08	2.15774e+08	8.65757e+06	7.3667e+07	1.12961e+08	1.68538e+08		3.18065e+07	4.03086e+07
cbdbA1309	Q3ZYQ0	Putative type IV pilus assembly family protein OS=Dehalococcoides mccartyi (strain CBDB1) GN=cbdbA1309 PE=4 SV=1	FALSE	0	142.8	52	21	276	21	1	494	54.8	5.12	High	High	High	High	High	High	High	High	High	Not Found	High	High	6.46218e+07	5.25221e+07	1.53137e+07	2.03516e+08	2.04268e+08	2.60241e+07	2.13654e+08	2.07349e+08	2.5628e+08		5.71935e+06	1.38882e+08
cbdbA104	Q3ZWI3	Putative type I restriction-modification system methylation subunit OS=Dehalococcoides mccartyi (strain CBDB1) GN=cbdbA104 PE=4 SV=1	FALSE	0	142.544	47	24	159	24	1	645	73.8	5.69	Not Found	High	High	High	High	High	High	High	High	Not Found	High	High		6.33022e+06	1.52265e+06	6.35478e+07	5.23697e+07	1.84547e+07	2.26141e+07	3.23714e+07	2.85695e+07		1.11737e+07	2.5054e+07
cbdbA608	Q3ZX28	Ribonucleotide reductase OS=Dehalococcoides mccartyi (strain CBDB1) GN=nrd PE=4 SV=1	FALSE	0	142.167	46	25	191	23	1	599	66.3	6.34	High	High	High	High	High	High	High	High	High	High	Not Found	High	9.12708e+06	4.99785e+07	1.14678e+07	1.29939e+08	2.38021e+08	5.79931e+06	1.72615e+08	1.66989e+08	9.94423e+07	3.72747e+06		1.04739e+08
cbdbA583	Q3ZX03	Tyrosine--tRNA ligase OS=Dehalococcoides mccartyi (strain CBDB1) GN=tyrS PE=3 SV=1	FALSE	0	141.359	56	20	142	20	1	396	44.4	5.88	High	Not Found	High	High	High	Not Found	High	High	High	Not Found	Not Found	High	2.81268e+06		1.13253e+06	5.55981e+07	3.7222e+07		2.74332e+07	3.18436e+07	2.42571e+07			3.03943e+07
cbdbA1684	Q3ZW57	AIR synthase domain protein OS=Dehalococcoides mccartyi (strain CBDB1) GN=cbdbA1684 PE=4 SV=1	FALSE	0	141.13	47	16	273	16	1	357	38.4	5.34	High	High	High	High	High	High	High	High	High	High	High	High	6.47255e+06	1.32549e+07	2.15314e+07	4.81452e+08	3.96616e+08	9.62648e+07	3.62245e+08	3.07584e+08	4.25903e+08	8.88535e+06	3.35392e+07	9.30886e+07
cbdbA454	Q3ZZQ8	50S ribosomal protein L18 OS=Dehalococcoides mccartyi (strain CBDB1) GN=rplR PE=3 SV=1	FALSE	0	140.254	76	16	344	16	1	121	13.3	9.88	High	High	High	High	High	High	High	High	High	High	High	High	9.14061e+07	2.62321e+07	8.57622e+07	4.71184e+08	6.04615e+08	6.65636e+07	1.95775e+08	1.95625e+08	3.36361e+08	3.88221e+07	7.8481e+07	1.47889e+08
cbdbA108	Q3ZWH9	Putative helicase (Snf2 family) OS=Dehalococcoides mccartyi (strain CBDB1) GN=cbdbA108 PE=4 SV=1	FALSE	0	139.993	33	26	137	26	1	1033	118.7	6.13	Not Found	High	Not Found	High	High	High	High	High	High	Not Found	High	High		7.99921e+06		1.32687e+07	2.11888e+07	6.03319e+06	4.99369e+07	4.77149e+07	1.59852e+07		3.17865e+06	2.31586e+07
cbdbA1639	Q3ZW44	Prephenate dehydratase OS=Dehalococcoides mccartyi (strain CBDB1) GN=pheA PE=4 SV=1	FALSE	0	139.803	68	18	262	18	1	276	31.2	6.89	High	High	High	High	High	High	High	High	High	High	High	High	4.74984e+06	6.1226e+06	1.27643e+07	2.89228e+08	2.22523e+08	2.11635e+07	2.03733e+08	2.51788e+08	1.72359e+08	7.78179e+06	1.14552e+07	8.3527e+07
cbdbA15	Q3ZWA9	Uncharacterized protein OS=Dehalococcoides mccartyi (strain CBDB1) GN=cbdbA15 PE=4 SV=1	FALSE	0	139.668	80	18	235	18	1	231	25.4	5.86	High	High	High	High	High	High	High	High	High	High	High	High	3.70533e+07	4.06907e+07		9.10233e+07	9.45937e+07	6.65156e+07	1.36774e+08	1.51245e+08	2.7628e+08	1.88096e+07	4.32909e+07	1.09165e+08
cbdbA397	Q3ZZK7	UvrABC system protein B OS=Dehalococcoides mccartyi (strain CBDB1) GN=uvrB PE=3 SV=1	FALSE	0	139.263	42	24	156	24	1	664	75.7	5.83	High	High	High	High	High	High	High	High	High	Not Found	High	High	1.04995e+07		1.11014e+07	3.44829e+07	5.632e+07	1.91281e+07	2.53915e+07	3.84767e+07	3.85139e+07		9.7954e+06	1.47377e+07
cbdbA1382	Q3ZYX8	Putative nicotinate-nucleotide pyrophosphorylase OS=Dehalococcoides mccartyi (strain CBDB1) GN=pncB PE=4 SV=1	FALSE	0	138.895	68	20	200	20	1	333	35.9	6.33	High	High	Not Found	High	High	High	High	High	High	Not Found	High	High	1.13735e+07	9.32911e+06		1.43162e+08	1.84228e+08	1.14346e+07	2.09862e+08	1.47525e+08	1.63815e+08		1.1711e+07	7.58418e+07
cbdbA385	Q3ZZG8	Sensor histidine kinase OS=Dehalococcoides mccartyi (strain CBDB1) GN=cbdbA385 PE=4 SV=1	FALSE	0	138.477	59	23	172	23	1	357	40.5	6.7	High	High	Not Found	High	High	High	High	High	High	Not Found	High	High		1.07798e+07		1.22599e+08	1.99438e+08		1.20734e+08	1.30104e+08	1.61393e+08		3.64116e+06	5.2494e+07
cbdbA1006	Q3ZY24	Acyl-CoA synthetase (AMP-forming) / AMP-acid ligase OS=Dehalococcoides mccartyi (strain CBDB1) GN=cbdbA1006 PE=4 SV=1	FALSE	0	138.457	48	22	175	22	1	505	55.6	5.99	Not Found	High	Not Found	High	High	High	High	High	High	High	High	High		5.84105e+06		7.09239e+07	1.13825e+08	4.01038e+06	5.08136e+07	5.12258e+07	3.81264e+07	504665	1.0262e+07	2.21445e+07
cbdbA577	Q3ZX08	DNA ligase OS=Dehalococcoides mccartyi (strain CBDB1) GN=ligA PE=3 SV=1	FALSE	0	137.11	49	28	125	28	1	677	75.2	6.64	High	High	High	High	High	High	High	High	High	Not Found	High	High	1.55225e+07	7.15724e+06	1.3993e+07	3.27287e+07	3.92871e+07	1.60901e+07	3.19278e+07	9.16215e+06	1.99079e+07		1.08715e+07	1.42999e+07
cbdbA641	Q3ZX54	Nicotinate-nucleotide--dimethylbenzimidazole phosphoribosyltransferase OS=Dehalococcoides mccartyi (strain CBDB1) GN=cobT PE=3 SV=1	FALSE	0	137.014	45	13	123	13	1	352	36.7	6.8	Not Found	Not Found	Not Found	High	High	Not Found	High	High	High	Not Found	Not Found	High				7.54393e+07	3.10588e+07		2.70537e+07	6.03955e+07	2.51883e+07			3.36e+07
cbdbA999	Q3ZXY6	Uncharacterized protein OS=Dehalococcoides mccartyi (strain CBDB1) GN=cbdbA999 PE=4 SV=1	FALSE	0	136.812	64	17	285	17	1	244	27.3	5.72	High	High	High	High	High	High	High	High	High	High	High	High	2.12493e+07	2.36821e+07	1.07126e+07	4.45378e+08	4.69357e+08	1.57998e+07	2.91398e+08	2.97299e+08	3.4134e+08	1.65471e+06	5.34164e+07	1.32359e+08
cbdbA309	Q3ZZD1	Inorganic pyrophosphatase OS=Dehalococcoides mccartyi (strain CBDB1) GN=ppa PE=3 SV=1	FALSE	0	136.563	57	17	251	17	1	211	24.3	7.02	High	High	High	High	High	High	High	High	High	Not Found	High	High	2.54085e+07	4.49623e+07	8.3021e+06	6.28956e+08	6.17708e+08	4.87804e+07	3.66818e+08	2.24105e+08	4.63257e+08		4.99689e+07	1.90188e+08
cbdbA1224	Q3ZYH9	Gamma-glutamyl phosphate reductase OS=Dehalococcoides mccartyi (strain CBDB1) GN=proA PE=3 SV=1	FALSE	0	135.951	58	23	195	23	1	424	45.5	6.67	High	High	High	High	High	High	High	High	High	Not Found	Not Found	High	8.71069e+06	3.08218e+06	7.82098e+06	1.47484e+08	8.43026e+07	7.74592e+06	3.10294e+08	1.47387e+08	2.00781e+08			6.28473e+07
cbdbA185	Q3ZWP1	Sensor histidine kinase OS=Dehalococcoides mccartyi (strain CBDB1) GN=rdhC PE=4 SV=1	FALSE	0	135.536	46	22	143	22	1	597	67.7	5.53	High	High	High	High	High	High	High	High	High	Not Found	High	High	7.98231e+07	3.2485e+07	1.18344e+06	3.84282e+07	9.11592e+07	3.4567e+07	3.41725e+07	7.50912e+07	2.50463e+07			4.04842e+07
cbdbA514	Q3ZZT4	Replicative DNA helicase OS=Dehalococcoides mccartyi (strain CBDB1) GN=dnaB PE=4 SV=1	FALSE	0	135.092	52	22	178	22	1	458	51.4	5.3	High	High	Not Found	High	High	High	High	High	High	Not Found	High	High	6.19594e+06	1.99735e+07		1.04884e+08	1.32957e+08	3.21253e+07	1.34118e+08	2.05937e+08	9.28063e+07		5.70358e+06	7.53285e+07
cbdbA1179	Q3ZYG4	Arginine biosynthesis bifunctional protein ArgJ OS=Dehalococcoides mccartyi (strain CBDB1) GN=argJ PE=3 SV=1	FALSE	0	134.724	51	19	231	19	1	405	43.1	5.78	High	High	High	High	High	High	High	High	High	High	High	High	1.19527e+07	1.48988e+07	7.49141e+06	2.69095e+08	3.4753e+08	1.90365e+07	2.40501e+08	2.02782e+08	1.52491e+08	2.69861e+06	1.26296e+07	6.86515e+07
cbdbA449	Q3ZZL4	50S ribosomal protein L14 OS=Dehalococcoides mccartyi (strain CBDB1) GN=rplN PE=3 SV=1	FALSE	0	134.68	58	12	344	12	1	122	13.2	9.91	High	High	High	High	High	High	High	High	High	High	High	High	7.02663e+07	1.36783e+08	8.42477e+07	1.09159e+09	1.24092e+09	3.61747e+08	5.63091e+08	6.97849e+08	8.54716e+08	2.20683e+07	2.96354e+08	4.52591e+08
cbdbA1734	Q3ZZW6	Bisphosphoglycerate-independent phosphoglycerate mutase OS=Dehalococcoides mccartyi (strain CBDB1) GN=cbdbA1734 PE=4 SV=1	FALSE	0	134.58	56	20	209	20	1	393	42.5	6.47	High	High	High	High	High	High	High	High	High	High	High	High	1.47822e+07	1.1303e+07	1.5799e+07	1.04328e+08	1.47973e+08	5.67973e+06	8.14881e+07	1.41994e+08	9.70256e+07	1.37306e+07	2.11249e+07	6.24753e+07
cbdbA761	Q3ZXD2	Putative K(+)-stimulated pyrophosphate-energized sodium pump OS=Dehalococcoides mccartyi (strain CBDB1) GN=hppA PE=3 SV=1	FALSE	0	133.942	23	18	210	18	1	679	69.5	5.88	High	High	High	High	High	High	High	High	High	Not Found	Not Found	High	9.79297e+06	4.1907e+06	2.66188e+06	3.91506e+08	4.66507e+08	2.3183e+07	2.73863e+08	3.4642e+08	1.97915e+08			1.04577e+08
cbdbA124	Q3ZWG8	DegV family protein OS=Dehalococcoides mccartyi (strain CBDB1) GN=cbdbA124 PE=4 SV=1	FALSE	0	133.781	63	14	267	14	1	279	29.9	8.48	High	High	Not Found	High	High	High	High	High	High	Not Found	High	High	3.76127e+06	5.48277e+06		3.51901e+08	4.12738e+08	1.80868e+07	2.79699e+08	3.03444e+08	1.25497e+08		3.42915e+06	9.37915e+07
cbdbA555	Q3ZWX9	Lysine--tRNA ligase OS=Dehalococcoides mccartyi (strain CBDB1) GN=lysS PE=3 SV=1	FALSE	0	133.158	42	26	171	26	1	498	56.8	5.72	High	High	High	High	High	High	High	High	High	Not Found	High	High	7.62283e+06	4.44412e+06	5.12165e+06	2.6975e+08	2.67997e+08	1.02034e+07	9.50468e+07	1.0357e+08	2.34331e+08		1.08776e+07	6.71591e+07
cbdbB11	Q3ZZB6	Uncharacterized protein OS=Dehalococcoides mccartyi (strain CBDB1) GN=cbdbA328.1 PE=4 SV=1	FALSE	0	132.977	63	13	311	13	1	256	27.4	4.91	High	High	High	High	High	High	High	High	High	High	High	High	1.19587e+08	1.194e+08	1.2788e+08	2.5439e+08	1.79629e+08	6.53423e+07	1.15334e+08	1.16489e+08	2.2481e+08	4.30241e+07	1.20684e+08	1.12154e+08
cbdbA1114	Q3ZYB9	Dihydroorotase OS=Dehalococcoides mccartyi (strain CBDB1) GN=pyrC PE=3 SV=1	FALSE	0	131.92	60	18	145	18	1	428	45.1	5.71	High	High	High	High	High	High	High	High	High	Not Found	High	High	6.67285e+06	3.98207e+06	9.8919e+06	9.52975e+07	1.00498e+08	1.34148e+07	1.32243e+08	1.12607e+08	8.33956e+07		4.52277e+06	2.46996e+07
cbdbA841	Q3ZXK4	Elongation factor 4 OS=Dehalococcoides mccartyi (strain CBDB1) GN=lepA PE=3 SV=1	FALSE	0	131.676	46	21	145	21	1	605	67	6.55	High	High	Not Found	High	High	High	High	High	High	Not Found	High	High	1.95612e+07	7.41711e+06		2.58656e+07	5.18701e+07	1.52418e+07	3.07766e+07	3.0508e+07	2.28448e+07		1.21382e+07	4.10154e+07
cbdbA912	Q3ZXS9	Superoxide dismutase OS=Dehalococcoides mccartyi (strain CBDB1) GN=sodA PE=3 SV=1	FALSE	0	131.502	58	15	296	15	1	192	22	6.11	High	High	High	High	High	High	High	High	High	High	High	High	9.40366e+07	1.40186e+08	1.67835e+08	1.15748e+08	8.98072e+07	2.11931e+08	9.46081e+07	6.44465e+07	2.58485e+08	5.62274e+07	2.06664e+08	1.20533e+08
cbdbA962	Q3ZXX2	Uncharacterized protein OS=Dehalococcoides mccartyi (strain CBDB1) GN=cbdbA962 PE=4 SV=1	FALSE	0	131.185	68	17	154	17	1	237	26.9	6.04	High	High	High	High	High	High	High	High	High	High	Not Found	High	9.40892e+07	7.53396e+07	7.6053e+07	1.61363e+08	1.63697e+08	6.64494e+07	6.56665e+07	1.04892e+08	2.55825e+08	4.18656e+07		7.52953e+07
cbdbA1014	Q3ZY19	Putative SpoIIIJ-associated protein Jag OS=Dehalococcoides mccartyi (strain CBDB1) GN=cbdbA1014 PE=4 SV=1	FALSE	0	130.871	67	17	297	17	1	193	21.8	4.94	High	High	High	High	High	High	High	High	High	Not Found	High	High	6.81389e+07	7.75413e+07	5.20352e+07	6.43905e+08	6.13524e+08	1.19407e+08	4.131e+08	2.42362e+08	2.30405e+08		7.04343e+07	1.39792e+08
cbdbA1417	Q3ZYZ4	Uncharacterized protein OS=Dehalococcoides mccartyi (strain CBDB1) GN=cbdbA1417 PE=4 SV=1	FALSE	0	130.753	54	18	243	18	1	325	37.3	6.7	High	High	High	High	High	High	High	High	High	High	High	High	5.79959e+07	1.69503e+07	1.30641e+07	1.24556e+08	1.43485e+08	2.5364e+07	1.86814e+08	2.04004e+08	1.95454e+08	7.66951e+06	2.36032e+07	7.75094e+07
cbdbA351	Q3ZZF0	3-dehydroquinate synthase OS=Dehalococcoides mccartyi (strain CBDB1) GN=aroB PE=3 SV=1	FALSE	0	130.687	56	17	195	17	1	364	40.3	6.86	High	High	High	High	High	High	High	High	High	High	High	High	4.39452e+07	3.5717e+07	1.06036e+07	2.04828e+08	2.12531e+08	6.46084e+07	9.32143e+06	3.6686e+07	4.87432e+07	8.32394e+06	3.57051e+07	5.44155e+07
cbdbA311	Q3ZZC9	4-hydroxy-3-methylbut-2-en-1-yl diphosphate synthase OS=Dehalococcoides mccartyi (strain CBDB1) GN=ispG PE=3 SV=1	FALSE	0	130.584	67	21	195	21	1	348	37.1	8.21	Not Found	High	High	High	High	High	High	High	High	Not Found	High	High		1.11754e+07	457710	1.83782e+08	1.98081e+08	7.65092e+06	1.06534e+08	1.20486e+08	1.3936e+08		1.63318e+07	3.12052e+07
cbdbA503	Q3ZZR8	Glutamine--fructose-6-phosphate aminotransferase [isomerizing] OS=Dehalococcoides mccartyi (strain CBDB1) GN=glmS PE=3 SV=1	FALSE	0	130.337	52	22	147	22	1	593	64.8	6.62	High	High	High	High	High	High	High	High	High	Not Found	High	High	1.31096e+07	2.88e+07	6.28158e+06	2.80128e+07	3.32996e+07	3.37304e+07	5.97178e+07	3.70948e+07	2.13439e+07		7.88194e+06	1.92145e+07
cbdbA1069	Q3ZY67	Cob(I)alamin adenosyltransferase OS=Dehalococcoides mccartyi (strain CBDB1) GN=cobA PE=4 SV=1	FALSE	0	130.031	81	16	215	16	1	182	20.2	6.34	High	High	High	High	High	High	High	High	High	High	High	High	3.04693e+07	2.88664e+07	2.55846e+07	5.05056e+07	1.50989e+08	4.54378e+07	8.7434e+07	5.61959e+07	1.38728e+08	1.14957e+07	1.87664e+07	3.48676e+07
cbdbA457	Q3ZZQ5	50S ribosomal protein L15 OS=Dehalococcoides mccartyi (strain CBDB1) GN=rplO PE=3 SV=1	FALSE	0	129.943	69	15	454	15	1	153	16.7	10.27	High	High	High	High	High	High	High	High	High	High	High	High	1.76241e+08	1.58351e+08	2.57611e+08	1.40666e+09	1.49893e+09	2.783e+08	8.19275e+08	1.03764e+09	1.19919e+09	1.76741e+08	1.1332e+08	4.25627e+08
cbdbA561	Q3ZWX3	Recombination protein RecR OS=Dehalococcoides mccartyi (strain CBDB1) GN=recR PE=3 SV=1	FALSE	0	129.792	91	16	146	16	1	204	22.5	6.33	High	High	High	High	High	High	High	High	High	Not Found	High	High	9.63659e+07	5.28195e+07	1.44857e+07	9.18692e+07	1.187e+08	8.9201e+07	8.3811e+07	1.14806e+08	1.25772e+08		1.59162e+07	3.44019e+07
cbdbA717	Q3ZXC5	Triosephosphate isomerase OS=Dehalococcoides mccartyi (strain CBDB1) GN=tpiA PE=3 SV=1	FALSE	0	129.435	76	18	206	18	1	253	27.4	6.05	High	High	Not Found	High	High	High	High	High	High	Not Found	High	High	9.99882e+06	3.86909e+07		1.45089e+08	1.85435e+08	7.09892e+07	2.09052e+08	1.38189e+08	2.30567e+08		2.87148e+07	9.94512e+07
cbdbA659	Q3ZX41	Iron-sulfur cluster binding protein OS=Dehalococcoides mccartyi (strain CBDB1) GN=cbdbA659 PE=4 SV=1	FALSE	0	129.116	37	18	173	18	1	640	68.6	5.6	High	High	High	High	High	High	High	High	High	Not Found	High	High	2.48194e+07	7.66962e+06	9.37434e+06	4.8374e+07	6.7722e+07	1.17959e+07	1.42214e+08	6.653e+07	9.04448e+07		3.00079e+07	4.2254e+07
cbdbA1102	Q3ZY85	6,7-dimethyl-8-ribityllumazine synthase OS=Dehalococcoides mccartyi (strain CBDB1) GN=ribH PE=3 SV=1	FALSE	0	129.057	92	11	356	11	1	155	16.3	7.34	High	High	High	High	High	High	High	High	High	High	High	High	1.07982e+08	1.54705e+08	1.20937e+08	7.61301e+08	9.4573e+08	1.51721e+08	8.566e+08	6.23668e+08	8.11763e+08	6.32176e+07	1.73668e+08	4.79384e+08
cbdbA451	Q3ZZL2	50S ribosomal protein L5 OS=Dehalococcoides mccartyi (strain CBDB1) GN=rplE PE=3 SV=1	FALSE	0	129.038	89	16	299	16	1	179	20.1	9.31	High	High	High	High	High	High	High	High	High	High	High	High	8.4915e+07	1.65096e+08	1.84438e+07	531870048	5.28101e+08	1.33781e+08	6.76379e+08	4.49008e+08	1.44673e+08	1.08797e+07	5.91419e+07	1.60322e+08
cbdbA1021	Q3ZY11	Conserved domain protein OS=Dehalococcoides mccartyi (strain CBDB1) GN=cbdbA1021 PE=4 SV=1	FALSE	0	128.584	94	12	268	12	1	80	8.9	6.77	High	High	High	High	High	High	High	High	High	High	High	High	5.70789e+07	1.05426e+08	6.16848e+07	1.985e+08	4.93027e+08	6.0387e+07	5.78097e+08	2.12049e+08	6.89257e+08	2.37184e+07	1.29817e+08	1.01657e+08
cbdbA1132	Q3ZYA5	Uncharacterized protein OS=Dehalococcoides mccartyi (strain CBDB1) GN=cbdbA1132 PE=4 SV=1	FALSE	0	128.043	67	15	199	15	1	88	9.3	10.07	Not Found	Not Found	Not Found	High	High	Not Found	High	High	High	Not Found	Not Found	High				3.34223e+08	4.80126e+08		3.67476e+08	3.01037e+08	255836902			9.16192e+07
cbdbA1357	Q3ZYV2	Chaperone protein DnaJ OS=Dehalococcoides mccartyi (strain CBDB1) GN=dnaJ PE=3 SV=1	FALSE	0	127.555	49	19	215	19	1	359	39.1	7.11	Not Found	Not Found	Not Found	High	High	Not Found	High	High	High	Not Found	Not Found	High				3.36944e+08	4.85086e+08		1.35637e+08	1.73734e+08	2.19684e+08			6.2053e+07
cbdbA463	Q3ZZP9	30S ribosomal protein S13 OS=Dehalococcoides mccartyi (strain CBDB1) GN=rpsM PE=3 SV=1	FALSE	0	127.345	60	20	366	20	1	129	14.8	10.7	High	High	High	High	High	High	High	High	High	High	High	High	2.5101e+07	2.50658e+07	1.93985e+07	2.04129e+09	2.38796e+09	3.51627e+07	1.20396e+09	8.19014e+08	2.01117e+09	1.53233e+07	6.38526e+07	4.98421e+08
cbdbA1389	Q3ZYX1	Probable hemolysin-related protein OS=Dehalococcoides mccartyi (strain CBDB1) GN=cbdbA1389 PE=4 SV=1	FALSE	0	127.061	32	13	203	13	1	424	46.9	5.05	High	High	High	High	High	High	High	High	High	Not Found	High	High	1.07296e+07	1.13979e+07	6.47369e+06	2.03775e+08	1.94544e+08	1.50022e+07	1.25427e+08	1.4815e+08	1.24254e+08		4.52037e+06	1.20473e+08
cbdbA148	Q3ZWK0	Sensor histidine kinase OS=Dehalococcoides mccartyi (strain CBDB1) GN=cbdbA148 PE=4 SV=1	FALSE	0	126.978	29	24	99	23	1	1062	120	5.94	Not Found	Not Found	Not Found	High	High	Not Found	High	High	High	Not Found	Not Found	High				4.476e+07	4.72505e+07		9.37618e+06	3.61173e+07	1.08131e+07			2.95863e+06
cbdbA68	Q3ZWC1	Queuine tRNA-ribosyltransferase OS=Dehalococcoides mccartyi (strain CBDB1) GN=tgt PE=3 SV=1	FALSE	0	125.825	39	19	155	19	1	392	44	6.93	Not Found	High	Not Found	High	High	High	High	High	High	Not Found	High	High		2.14452e+07		80451368	1.84133e+08	8.16293e+07	5.86986e+07	3.09982e+07	1.31246e+08		1.0464e+08	3.40447e+07
cbdbA1397	Q3ZYW5	Hydrogenase accessory protein HypB OS=Dehalococcoides mccartyi (strain CBDB1) GN=hypB PE=4 SV=1	FALSE	0	125.157	65	15	238	15	1	217	23.6	5.19	High	High	High	High	High	High	High	High	High	High	High	High	2.64248e+07	4.48793e+06	2.95716e+06	2.77114e+08	4.90421e+08	2.33915e+07	2.68245e+08	3.87579e+08	3.58283e+08	7.76613e+06	1.44099e+07	1.94955e+08
cbdbA1354	Q3ZYV5	GTPase Der OS=Dehalococcoides mccartyi (strain CBDB1) GN=engA PE=3 SV=1	FALSE	0	124.275	47	19	210	19	1	442	48.7	6.74	High	High	High	High	High	High	High	High	High	Not Found	High	High	8.98356e+06	1.30122e+07	1.46053e+06	98172313	1.47081e+08	8.93482e+06	9.10786e+07	1.08362e+08	9.72651e+07		8.20135e+06	4.54473e+07
cbdbA386	Q3ZZG7	DNA-binding response regulator, LuxR family OS=Dehalococcoides mccartyi (strain CBDB1) GN=cbdbA386 PE=4 SV=1	FALSE	0	124.052	61	17	259	17	1	232	25.4	6.61	High	Not Found	High	High	High	High	High	High	High	High	High	High	2.27126e+07		9.57086e+07	3.36021e+08	3.60003e+08	3.26531e+07	1.88907e+08	3.53863e+08	4.51775e+08	4.01567e+07	3.35567e+07	1.59223e+08
cbdbA450	Q3ZZL3	50S ribosomal protein L24 OS=Dehalococcoides mccartyi (strain CBDB1) GN=rplX PE=3 SV=1	FALSE	0	123.729	51	12	403	12	1	103	11.5	10.01	High	High	High	High	High	High	High	High	High	High	High	High	1.85507e+07	4.699e+07	1.05058e+08	8.26713e+08	9.70409e+08	5.82056e+07	4.29257e+08	7.20431e+08	1.42331e+09	5.89962e+07	8.14119e+07	3.55692e+08
cbdbA349	Q3ZZF2	Putative ubiquinone/menaquinone biosynthesis methlytransferase UbiE OS=Dehalococcoides mccartyi (strain CBDB1) GN=cbdbA349 PE=4 SV=1	FALSE	0	123.319	55	10	231	10	1	258	29.6	8.94	High	High	High	High	High	High	High	High	High	Not Found	High	High	1.2626e+07	1.56053e+07	1.04857e+07	4.33547e+08	6.79718e+08	2.94923e+07	2.06916e+08	2.63551e+08	1.24786e+08		1.08889e+07	1.67749e+08
cbdbA957	Q3ZXX7	50S ribosomal protein L11 OS=Dehalococcoides mccartyi (strain CBDB1) GN=rplK PE=3 SV=1	FALSE	0	123.078	71	12	375	12	1	140	14.7	9.67	High	High	High	High	High	High	High	High	High	High	High	High	1.18979e+08	2.87242e+08	102783181	9.65111e+08	1.81898e+09	2.20805e+08	1.5036e+09	1.24079e+09	1.23547e+09	1.54776e+07	2.95389e+08	4.91246e+08
cbdbA1729	Q3ZZX0	TPR domain protein OS=Dehalococcoides mccartyi (strain CBDB1) GN=cbdbA1729 PE=4 SV=1	FALSE	0	122.964	49	17	405	17	1	268	30	4.75	High	Not Found	High	High	High	High	High	High	High	High	High	High	2.2653e+07		59198296	3.29669e+08	5.07841e+08	3.20048e+06	4.77109e+08	4.92856e+08	6.34383e+08	4.48461e+07	1.28331e+07	1.72512e+08
cbdbA1237	Q3ZYG9	GTP-binding protein TypA OS=Dehalococcoides mccartyi (strain CBDB1) GN=typA PE=4 SV=1	FALSE	0	122.752	40	23	121	23	1	609	67.9	5.78	High	High	Not Found	High	High	High	High	High	High	Not Found	High	High	5.61583e+06	7.30846e+06		7.62369e+07	1.01423e+08	1.21794e+07	1.61241e+07	4.99103e+07	7.94118e+06		12574210	1.95765e+07
cbdbA407	Q3ZZJ9	3-isopropylmalate dehydratase small subunit OS=Dehalococcoides mccartyi (strain CBDB1) GN=leuD PE=3 SV=1	FALSE	0	122.011	71	15	377	15	1	167	18.1	6.95	High	High	High	High	High	High	High	High	High	High	High	High	3.39919e+08	1.19301e+08	412203249	1.02153e+09	1.30958e+09	2.83801e+08	6.47744e+08	7.00731e+08	8.74983e+08	5.55354e+07	1.26787e+08	3.00691e+08
cbdbA1455	Q3ZZ06	Putative reductive dehalogenase OS=Dehalococcoides mccartyi (strain CBDB1) GN=rdhA PE=4 SV=1	FALSE	0	121.688	40	14	135	14	1	497	55.2	6.64	High	Not Found	Not Found	High	High	High	High	High	High	Not Found	Not Found	High	3.82171e+06			1.24019e+08	1.19105e+08	1.04964e+07	2.898e+08	2.07398e+07	8.16857e+06			9.92785e+07
cbdbA452	Q3ZZL0	30S ribosomal protein S8 OS=Dehalococcoides mccartyi (strain CBDB1) GN=rpsH PE=3 SV=1	FALSE	0	121.566	92	14	346	14	1	131	14.4	10.11	High	High	Not Found	High	High	High	High	High	High	Not Found	High	High	2.96408e+07	5.17593e+07		1.01848e+09	1.08859e+09	2.6214e+07	5.11307e+08	3.98259e+08	2.99504e+08		3.97662e+07	1.79106e+08
cbdbA307	Q3ZZD3	Phenylalanine--tRNA ligase alpha subunit OS=Dehalococcoides mccartyi (strain CBDB1) GN=pheS PE=3 SV=1	FALSE	0	121.009	55	18	185	18	1	346	39.1	6.55	High	High	High	High	High	High	High	High	High	High	High	High	1.4271e+07	3.53638e+07	1.37795e+07	3.18851e+08	3.8578e+08	3.07221e+07	1.92025e+08	2.33639e+08	3.26702e+08	8.05249e+06	1.88184e+07	5.16079e+07
cbdbA1624	Q67B80	Putative reductive dehalogenase OS=Dehalococcoides mccartyi (strain CBDB1) GN=rdhA PE=4 SV=1	FALSE	0	120.398	32	10	178	1	1	495	54.2	6.27	Not Found	Not Found	Not Found	Not Found	Not Found	Not Found	Not Found	Not Found	High	Not Found	Not Found	Not Found									1.04467e+07
cbdbA892	Q3ZXQ6	Branched-chain amino acid ABC transporter,ATP-binding protein OS=Dehalococcoides mccartyi (strain CBDB1) GN=cbdbA892 PE=4 SV=1	FALSE	0	119.411	63	13	147	13	1	276	30.7	5.55	High	High	High	High	High	High	High	High	High	High	High	High	2.93897e+07	1.47969e+07	6.335e+06	5.89247e+07	7.87218e+07	4.29155e+07	8.32843e+07	8.46522e+07	6.05584e+07	4.01774e+06	2.41846e+07	2.32941e+07
cbdbA1323	Q3ZYT4	NADPH-dependent FMN reductase OS=Dehalococcoides mccartyi (strain CBDB1) GN=cbdbA1323 PE=4 SV=1	FALSE	0	119.376	72	15	208	15	1	190	21	7.33	High	High	High	High	High	High	High	High	High	Not Found	High	High	3.48537e+07	5.5654e+07	1.38513e+07	1.79826e+08	2.62405e+08	5.53124e+07	1.45205e+08	5.94253e+07	2.81291e+08		5.3988e+07	7.38779e+07
cbdbA1106	Q3ZY81	Hypothetical periplasmic protein OS=Dehalococcoides mccartyi (strain CBDB1) GN=cbdbA1106 PE=4 SV=1	FALSE	0	119.273	47	14	279	14	1	254	26.6	4.75	High	High	High	High	High	High	High	High	High	High	High	High	1.17077e+07	1.4029e+07	1.10094e+07	3.94906e+08	4.48619e+08	2.40908e+07	3.19711e+08	3.17324e+08	3.32675e+08	1.29874e+07	1.33154e+07	1.66286e+08
cbdbA1711	Q3ZW73	UPF0145 protein cbdbA1711 OS=Dehalococcoides mccartyi (strain CBDB1) GN=cbdbA1711 PE=3 SV=1	FALSE	0	119.108	75	10	285	10	1	104	11.3	7.34	High	High	High	High	High	High	High	High	High	High	High	High	4.64586e+07	9.4465e+07	1.30666e+07	4.58748e+08	4.55488e+08	6.27116e+07	3.54939e+08	4.40536e+08	1.816e+08	4.9895e+07	6.70557e+07	1.0533e+08
cbdbA481	Q3ZZT3	Uncharacterized protein OS=Dehalococcoides mccartyi (strain CBDB1) GN=cbdbA481 PE=4 SV=1	FALSE	0	118.75	48	15	180	15	1	343	37.9	5.55	High	High	High	High	High	High	High	High	High	High	High	High	5.55285e+07	7.73482e+07	4.64887e+07	4.46429e+07	7.29923e+07	7.25006e+07	3.05126e+07	1.9805e+07	6.80786e+07	1.72978e+07	1.19935e+08	3.9664e+07
cbdbA1401	Q3ZYW2	Hydrogenase expression/formation protein HypD OS=Dehalococcoides mccartyi (strain CBDB1) GN=hypD PE=4 SV=1	FALSE	0	118.546	51	15	163	15	1	364	39.8	6.76	Not Found	Not Found	High	High	High	High	High	High	High	Not Found	High	High			1.85205e+07	1.33118e+08	1.11084e+08	1.27585e+07	4.7195e+07	1.17417e+08	1.24795e+08		2.53227e+06	7.31061e+07
cbdbA470	Q3ZZP2	30S ribosomal protein S9 OS=Dehalococcoides mccartyi (strain CBDB1) GN=rpsI PE=3 SV=1	FALSE	0	117.262	83	13	386	13	1	132	14.5	10.73	High	High	High	High	High	High	High	High	High	High	High	High	1.45644e+08	1.57794e+08	3.22267e+08	1.58646e+09	1.80482e+09	2.95132e+08	9.98025e+08	1.11937e+09	8.46385e+08	2.18063e+08	2.67706e+08	8.30916e+08
cbdbA1463	Q3ZZ43	Peptide ABC transporter, periplasmic peptide-binding protein OS=Dehalococcoides mccartyi (strain CBDB1) GN=cbdbA1463 PE=4 SV=1	FALSE	0	116.857	35	15	250	15	1	543	59.7	4.78	High	High	High	High	High	High	High	High	High	High	High	High	3.74374e+07	1.04987e+07	3.36529e+07	6.89306e+08	8.2492e+08	2.35024e+07	2.2552e+08	6.79481e+08	4.67841e+08	4.13853e+07	2.27224e+07	3.24214e+08
cbdbA227	Q3ZWT4	Uncharacterized protein OS=Dehalococcoides mccartyi (strain CBDB1) GN=cbdbA227 PE=4 SV=1	FALSE	0	116.746	44	10	225	10	1	285	31	4.59	High	High	Not Found	High	High	High	High	High	High	Not Found	High	High	3.78613e+06	7.56361e+06		3.54287e+08	3.59572e+08	6.34168e+06	1.61662e+08	2.53979e+08	1.2284e+08		1.08478e+07	9.92847e+07
cbdbA167	Q3ZWN3	Phosphate-specific transport system accessory protein PhoU OS=Dehalococcoides mccartyi (strain CBDB1) GN=phoU PE=3 SV=1	FALSE	0	116.677	66	14	229	14	1	221	25	5.11	High	High	High	High	High	High	High	High	High	High	High	High	9.06307e+06	2.432e+07	4.09379e+07	7.00681e+07	8.99413e+07	3.10617e+07	1.26064e+08	2.0127e+08	1.98116e+08		5.48512e+07	6.85483e+07
cbdbA419	Q3ZZJ0	NAD kinase OS=Dehalococcoides mccartyi (strain CBDB1) GN=nadK PE=3 SV=1	FALSE	0	116.565	56	13	165	13	1	284	31.1	6.4	High	High	High	High	High	High	High	High	High	High	High	High	5.67195e+07	8.47774e+07	4.9076e+07	1.26558e+08	1.48726e+08	3.62229e+07	6.72718e+07	1.25066e+08	1.38704e+08	2.79182e+06	3.92915e+06	9.52303e+07
cbdbA14	Q3ZWB0	Orotidine 5'-phosphate decarboxylase OS=Dehalococcoides mccartyi (strain CBDB1) GN=pyrF PE=3 SV=1	FALSE	0	116.471	77	18	172	18	1	270	30	5.41	High	High	High	High	High	High	High	High	High	Not Found	High	High	1.95314e+07	4.00136e+07	3.3424e+06	7.62845e+07	1.24745e+08	3.03252e+07	4.61762e+07	6.20878e+07	1.2636e+08		9.75377e+06	2.68344e+07
cbdbA983	Q3ZXZ7	Uncharacterized protein OS=Dehalococcoides mccartyi (strain CBDB1) GN=cbdbA983 PE=4 SV=1	FALSE	0	116.449	76	7	309	7	1	83	9.2	5.48	High	Not Found	High	High	High	High	High	High	High	Not Found	Not Found	High	3.89034e+07		1.07971e+07	1.00243e+09	1.15404e+09	1.67143e+07	9.58447e+08	7.94393e+08	8.73367e+08			4.00468e+08
cbdbA1061	Q3ZY73	Iron-sulfur cluster-binding protein OS=Dehalococcoides mccartyi (strain CBDB1) GN=cbdbA1061 PE=4 SV=1	FALSE	0	115.743	87	15	189	15	1	143	15.7	7.42	High	High	High	High	High	High	High	High	High	High	High	High	3.31263e+07	3.11428e+07	2.5494e+07	5.505e+08	7.44669e+08	2.53869e+07	4.49028e+08	3.08012e+08	3.3849e+08	3.09759e+07	2.76088e+07	1.18028e+08
cbdbA294	Q3ZZ94	Uncharacterized protein OS=Dehalococcoides mccartyi (strain CBDB1) GN=cbdbA294 PE=4 SV=1	FALSE	0	115.57	24	10	338	10	1	587	59.9	5.02	High	High	High	High	High	High	High	High	High	High	High	High	1.13332e+08	5.92384e+07	7.23317e+07	1.10422e+09	1.38878e+09	9.06226e+07	1.12296e+09	6.41205e+08	8.05008e+08	3.53133e+07	5.0634e+07	4.84267e+08
cbdbA1248	Q3ZYK7	Putative hydrolase OS=Dehalococcoides mccartyi (strain CBDB1) GN=cbdbA1248 PE=4 SV=1	FALSE	0	115.447	55	14	177	14	1	275	31	6.04	High	High	High	High	High	High	High	High	High	High	High	High	3.1627e+07	1.67736e+07	1.95586e+07	8.60875e+07	9.52849e+07	3.839e+07	3.7783e+07	3.56576e+07	9.5436e+07	4.69797e+06	2.87955e+07	5.18128e+07
cbdbA1683	Q3ZW58	SAM-dependent methyltransferase UbiE/COQ5 family OS=Dehalococcoides mccartyi (strain CBDB1) GN=cbdbA1683 PE=4 SV=1	FALSE	0	115.199	64	14	145	14	1	221	24.7	9.35	High	Not Found	High	High	High	High	High	High	High	Not Found	High	High	1.37711e+07		3.28712e+06	1.14118e+08	8.65782e+07	1.20665e+07	1.12284e+08	4.10983e+07	4.99252e+07		1.56141e+07	5.32578e+07
cbdbA494	Q3ZZS3	PmbA OS=Dehalococcoides mccartyi (strain CBDB1) GN=cbdbA494 PE=4 SV=1	FALSE	0	114.972	47	17	138	17	1	433	46.8	5.41	Not Found	High	Not Found	High	High	High	High	High	High	Not Found	High	High		1.03154e+07		8.16953e+07	1.2135e+08	2.04616e+07	3.7261e+07	9.61138e+07	1.09423e+08		2.46055e+07	5.27325e+07
cbdbA805	Q3ZXI6	3-isopropylmalate dehydratase small subunit OS=Dehalococcoides mccartyi (strain CBDB1) GN=leuD PE=3 SV=1	FALSE	0	114.878	89	11	281	11	1	166	18	5.39	High	High	High	High	High	High	High	High	High	Not Found	High	High	1.57515e+08	2.19458e+08	1.18989e+08	9.74905e+08	1.01237e+09	1.71661e+08	5.60565e+08	3.6098e+08	8.32744e+08		1.00906e+08	3.0944e+08
cbdbA484	Q3ZZT1	Methylthioribose-1-phosphate isomerase OS=Dehalococcoides mccartyi (strain CBDB1) GN=mtnA PE=3 SV=1	FALSE	0	114.856	50	16	227	16	1	332	35.9	6.24	High	High	High	High	High	High	High	High	High	High	High	High	6.15343e+06	1.194e+07	6.29333e+07	1.2387e+08	1.25413e+08	1.22432e+07	9.44564e+07	6.79381e+07	1.39036e+08	2.95236e+07	1.14961e+07	6.06449e+07
cbdbA1722	Q3ZZX5	N-acetyl-gamma-glutamyl-phosphate reductase OS=Dehalococcoides mccartyi (strain CBDB1) GN=argC PE=3 SV=1	FALSE	0	114.138	49	14	237	14	1	341	37.3	6.35	High	High	High	High	High	High	High	High	High	High	High	High	2.69967e+07	2.31993e+07	2.19083e+07	1.80256e+08	1.70947e+08	4.07552e+07	1.34505e+08	1.8801e+08	2.65588e+08	8.78762e+06	1.97475e+07	9.67512e+07
cbdbA151	Q3ZWJ7	DNA-binding response regulator OS=Dehalococcoides mccartyi (strain CBDB1) GN=cbdbA151 PE=4 SV=1	FALSE	0	114.064	96	14	176	14	1	123	13.9	5.97	High	High	High	High	High	High	High	High	High	High	High	High	7.55361e+06	1.26151e+07	1.03467e+07	2.89393e+08	2.67909e+08	2.79149e+07	2.33013e+08	1.72708e+08	1.31976e+08	1.68137e+07	1.23823e+07	9.21564e+07
cbdbA423	Q3ZZI8	Prephenate dehydrogenase OS=Dehalococcoides mccartyi (strain CBDB1) GN=cbdbA423 PE=4 SV=1	FALSE	0	113.954	52	15	192	15	1	288	31.9	7.17	High	High	High	High	High	High	High	High	High	Not Found	High	High	2.74241e+07	3.44353e+07	1.11414e+07	1.76449e+08	1.88705e+08	4.84564e+07	1.47503e+08	1.21469e+08	1.12421e+08		2.59234e+07	8.05023e+07
cbdbA9	Q3ZWB5	Uncharacterized protein OS=Dehalococcoides mccartyi (strain CBDB1) GN=cbdbA9 PE=4 SV=1	FALSE	0	113.82	42	21	215	21	1	387	43.8	9.19	High	High	Not Found	High	High	High	High	High	High	Not Found	High	High	4.25754e+07	2.6661e+07		2.4001e+08	2.19167e+08	3.11954e+07	91772508	8.1686e+07	4.52159e+07		2.16688e+07	6.20473e+07
cbdbA1730	Q3ZZW9	NifU protein, homolog OS=Dehalococcoides mccartyi (strain CBDB1) GN=cbdbA1730 PE=4 SV=1	FALSE	0	113.464	72	6	235	6	1	72	7.7	5.11	High	High	High	High	High	High	High	High	High	High	High	High	3.57239e+07	3.52067e+07	2.74202e+07	3.79066e+08	7.53559e+08	4.68223e+07	3.34828e+08	4.23564e+08	3.85853e+08	2.97914e+07	5.00081e+07	2.44679e+08
cbdbA801	Q3ZXJ0	RNA-splicing ligase RtcB OS=Dehalococcoides mccartyi (strain CBDB1) GN=cbdbA801 PE=3 SV=1	FALSE	0	113.319	55	20	69	20	1	486	52.5	7.12	Not Found	High	Not Found	Not Found	High	High	High	High	High	Not Found	Not Found	High		3.36328e+06			7.98163e+06	4.8733e+06	2.98043e+07	3.27674e+07	4.2341e+07			2.12391e+07
cbdbA723	Q3ZXB8	50S ribosomal protein L20 OS=Dehalococcoides mccartyi (strain CBDB1) GN=rplT PE=3 SV=1	FALSE	0	113.145	65	10	304	10	1	119	12.9	11.41	High	High	High	High	High	High	High	High	High	High	High	High	2.92893e+07	2.2509e+07	2.26642e+07	9.057e+08	9.58222e+08	9.02676e+07	3.65806e+08	7.50587e+08	2.88387e+08		6.28757e+07	1.77092e+08
cbdbA1449	Q3ZZ12	3-deoxy-D-arabino-heptulosonate 7-phosphate (DAHP) synthetase OS=Dehalococcoides mccartyi (strain CBDB1) GN=aroA PE=4 SV=1	FALSE	0	112.759	53	15	136	15	1	340	36.9	6.99	High	High	High	High	High	High	High	High	High	Not Found	High	High	9.22294e+06		1.01182e+06	9.77838e+07	1.39676e+08	9.60877e+06	1.45344e+08	2.05623e+08	1.64058e+08		3.88918e+06	6.4244e+07
cbdbA1120	Q3ZYB5	GTP cyclohydrolase 1 OS=Dehalococcoides mccartyi (strain CBDB1) GN=folE PE=3 SV=1	FALSE	0	112.528	63	13	150	13	1	189	21.1	7.53	High	High	High	High	High	High	High	High	High	High	High	High	6.73835e+06	9.83626e+06	2.60603e+07	7.75568e+07	1.01323e+08	8.67271e+06	6.43511e+07	4.31644e+07	1.69002e+08	2.50468e+07	8.89114e+06	3.64138e+07
cbdbA122	Q3ZWH0	Mrp family protein OS=Dehalococcoides mccartyi (strain CBDB1) GN=cbdbA122 PE=4 SV=1	FALSE	0	112.326	55	15	166	15	1	328	35.1	5.41	Not Found	High	Not Found	High	High	High	High	High	High	High	Not Found	High		1.77918e+07		1.10986e+08	1.16391e+08	9.10673e+06	4.83736e+07	9.23408e+07	3.23575e+07	1.56384e+07		2.04761e+07
cbdbA58	Q3ZWC8	Putative GTP-binding protein OS=Dehalococcoides mccartyi (strain CBDB1) GN=cbdbA58 PE=4 SV=1	FALSE	0	111.732	54	16	161	16	1	367	40.3	5.38	Not Found	Not Found	Not Found	High	High	High	High	High	High	High	Not Found	High				2.9497e+08	2.86224e+08	2.07062e+07	1.64991e+08	8.361e+07	6.27683e+07	3.35703e+06		3.26983e+07
cbdbA931	Q3ZXV7	30S ribosomal protein S15 OS=Dehalococcoides mccartyi (strain CBDB1) GN=rpsO PE=3 SV=1	FALSE	0	111.234	92	12	361	12	1	87	10	10.27	High	High	High	High	High	High	High	High	High	High	High	High	8.31286e+07	1.47101e+08	1.84512e+08	7.63134e+08	7.73871e+08	1.95031e+08	1.63056e+08	3.32279e+08	5.31266e+08	5.22472e+07	3.12995e+08	2.15005e+08
cbdbA1276	Q3ZYN1	Phosphoribosyl-AMP cyclohydrolase OS=Dehalococcoides mccartyi (strain CBDB1) GN=hisI PE=4 SV=1	FALSE	0	111.17	87	12	204	12	1	104	11.7	6.07	Not Found	High	Not Found	High	High	High	High	High	High	Not Found	Not Found	High		4.51591e+06		3.48545e+08	4.75421e+08	1.77226e+07	1.56887e+08	1.75744e+08	2.80298e+08			1.12299e+08
cbdbA1521	Q3ZZ76	Uncharacterized protein OS=Dehalococcoides mccartyi (strain CBDB1) GN=cbdbA1521 PE=4 SV=1	FALSE	0	111.087	32	16	145	16	1	543	61.5	6.05	High	High	Not Found	High	High	High	High	High	High	Not Found	High	High	1.85582e+07	2.18873e+07		7.77265e+07	4.59526e+07	4.28829e+07	7.18359e+07	6.49802e+07	1.1961e+07		9.28442e+06	4.1786e+07
cbdbA1020	Q3ZY12	30S ribosomal protein S6 OS=Dehalococcoides mccartyi (strain CBDB1) GN=rpsF PE=3 SV=1	FALSE	0	110.32	84	16	344	16	1	109	12.6	8.34	High	High	High	High	High	High	High	High	High	High	High	High	5.87045e+07	9.30995e+07	7.34946e+07	1.18542e+09	2.06056e+09	1.08181e+08	3.80093e+08	7.72424e+08	7.76457e+08	5.45361e+07	8.98698e+07	3.88629e+08
cbdbA434	Q3ZZM8	30S ribosomal protein S12 OS=Dehalococcoides mccartyi (strain CBDB1) GN=rpsL PE=3 SV=1	FALSE	0	110.31	67	15	397	15	1	144	15.8	11.25	High	High	High	High	High	High	High	High	High	High	High	High	2.89603e+08	1.71031e+08	2.62251e+08	1.9216e+09	1.34938e+09	3.69237e+08	1.24841e+09	1.7215e+09	1.92512e+09	2.87448e+07	1.94999e+08	4.76654e+08
cbdbA1108	Q3ZY79	Orotate phosphoribosyltransferase OS=Dehalococcoides mccartyi (strain CBDB1) GN=pyrE PE=3 SV=1	FALSE	0	110.13	83	16	172	16	1	187	20.3	7.01	High	High	Not Found	High	High	High	High	High	High	Not Found	High	High	2.61521e+07	8.91231e+06		1.45041e+08	2.73834e+08	2.35956e+07	1.87138e+08	2.4606e+08	1.71921e+08		1.52651e+07	4.2928e+07
cbdbA1335	Q3ZYS4	GGDEF domain OS=Dehalococcoides mccartyi (strain CBDB1) GN=cbdbA1335 PE=4 SV=1	FALSE	0	109.973	23	15	93	15	1	792	89.4	6.61	High	High	Not Found	High	High	High	High	High	High	Not Found	High	High	5.46143e+06	4.62804e+06		2.36902e+07	1.21841e+08	6.74961e+06	8.34129e+07	2.44686e+07	8.7463e+06		1.90908e+07	2.96885e+07
cbdbA187	Q3ZWR4	Putative reductive dehalogenase OS=Dehalococcoides mccartyi (strain CBDB1) GN=rdhA PE=4 SV=1	FALSE	0	109.8	41	16	49	16	1	455	50.3	6.23	High	Not Found	High	Not Found	Not Found	Not Found	High	High	High	Not Found	Not Found	High	5.37684e+06		1.54314e+07				1.68189e+07	7.38184e+06	1.07974e+08			8.46831e+06
cbdbA1217	Q3ZYI2	Serine protease, DegP OS=Dehalococcoides mccartyi (strain CBDB1) GN=cbdbA1217 PE=4 SV=1	FALSE	0	109.313	36	12	243	12	1	394	42.2	4.39	High	High	High	High	High	High	High	High	High	Not Found	High	High	4.5692e+07	3.90724e+07	2.77759e+07	3.00291e+08	3.39342e+08	6.73776e+07	3.96581e+08	5.02654e+08	4.25501e+08		4.45808e+07	2.33158e+08
cbdbA1019	Q3ZY13	Single-stranded DNA-binding protein OS=Dehalococcoides mccartyi (strain CBDB1) GN=ssb PE=4 SV=1	FALSE	0	109.141	90	16	282	16	1	135	15.3	5.33	High	High	High	High	High	High	High	High	High	Not Found	High	High	2.73326e+07	7.01298e+06	15299155	9.53991e+08	7.21781e+08	1.82647e+07	3.33918e+08	6.71749e+08	1.12707e+09		6.31595e+06	1.5291e+08
cbdbA516	Q3ZZV7	Thioredoxin reductase OS=Dehalococcoides mccartyi (strain CBDB1) GN=trxB PE=3 SV=1	FALSE	0	108.879	61	15	281	15	1	306	32.7	5.96	High	High	High	High	High	High	High	High	High	High	High	High	1.05332e+07	3.49718e+06	2.10178e+07	4.55338e+08	3.46269e+08	1.37751e+07	1.32402e+08	3.2337e+08	2.77873e+08	2.52451e+07	5.40296e+06	1.10459e+08
cbdbA1063	Q3ZY71	Cysteine synthase OS=Dehalococcoides mccartyi (strain CBDB1) GN=cysK PE=3 SV=1	FALSE	0	108.007	48	14	185	14	1	320	34	8.79	High	High	High	High	High	High	High	High	High	High	High	High	4.46645e+06	8.54209e+06	3.42868e+07	8.57343e+07	1.41447e+08	6.13328e+06	8.34472e+07	1.31628e+08	1.42537e+08	3.01332e+07	7.47108e+06	5.01312e+07
cbdbA332	Q3ZZB3	Uncharacterized protein OS=Dehalococcoides mccartyi (strain CBDB1) GN=cbdbA332 PE=4 SV=1	FALSE	0	107.109	89	8	158	8	1	71	8	6.01	Not Found	Not Found	Not Found	High	High	Not Found	High	High	High	Not Found	Not Found	High				3.34297e+08	2.12696e+08		1.32266e+08	1.97917e+08	8.94187e+07			4.52314e+07
cbdbA1378	Q3ZYY1	Phosphoribosylformylglycinamidine cyclo-ligase OS=Dehalococcoides mccartyi (strain CBDB1) GN=purM PE=3 SV=1	FALSE	0	107.091	49	13	218	13	1	340	36.4	6.19	High	High	High	High	High	High	High	High	High	Not Found	High	High	2.68964e+07	1.17238e+07		164863316	6.46311e+07	2.74388e+07	8.56507e+07	3.54622e+07	1.86323e+08		3.6939e+07	6.69373e+07
cbdbA752	Q3ZXD8	Thymidylate kinase OS=Dehalococcoides mccartyi (strain CBDB1) GN=tmk PE=3 SV=1	FALSE	0	106.809	62	14	152	14	1	208	23.1	8.06	Not Found	High	High	High	High	High	High	High	High	High	High	High		2.67858e+07	2.32147e+07	5.4425e+07	1.11631e+08	3.62173e+07	45889777	1.03518e+08	1.07485e+08	4.0709e+06	2.3371e+06	6.05173e+07
cbdbA1190	Q3ZYF6	DegV family protein OS=Dehalococcoides mccartyi (strain CBDB1) GN=cbdbA1190 PE=4 SV=1	FALSE	0	106.511	65	15	185	15	1	279	30.5	6.4	High	High	Not Found	High	High	High	High	High	High	Not Found	High	High	1.4384e+07	1.30491e+07		4.30485e+08	2.13358e+08	2.17911e+07	3.12829e+08	2.63701e+08	1.15791e+08		9.67342e+06	9.37252e+07
cbdbA1278	Q3ZYM9	1-(5-phosphoribosyl)-5-[(5-phosphoribosylamino)methylideneamino] imidazole-4-carboxamide isomerase OS=Dehalococcoides mccartyi (strain CBDB1) GN=hisA PE=3 SV=1	FALSE	0	106.508	79	16	185	16	1	244	26.2	6.61	High	High	Not Found	High	High	High	High	High	High	High	High	High	1.96824e+06	1.56314e+07		1.73428e+08	1.67057e+08	1.44522e+07	1.33063e+08	1.46111e+08	1.82294e+08	1.73023e+07	1.16056e+07	4.59936e+07
cbdbA1204	Q3ZYJ1	Malonyl CoA-acyl carrier protein transacylase OS=Dehalococcoides mccartyi (strain CBDB1) GN=fabD PE=3 SV=1	FALSE	0	106.293	61	14	183	14	1	310	32.7	6.67	High	High	High	High	High	High	High	High	High	Not Found	High	High	5.92812e+06	4.38353e+06	2.5851e+07	1.79189e+08	1.92645e+08	1.47572e+07	1.19916e+08	1.00684e+08	1.54926e+08		2.41491e+07	5.39915e+07
cbdbA819	Q3ZXM3	Phosphoribosylamine--glycine ligase OS=Dehalococcoides mccartyi (strain CBDB1) GN=purD PE=3 SV=1	FALSE	0	106.038	42	17	142	17	1	425	45.9	5.29	Not Found	High	High	High	High	High	High	High	High	Not Found	Not Found	High		1.70427e+06	28714647	1.03655e+08	1.45769e+08	2.06867e+06	6.94625e+07	1.30002e+08	5.84959e+07			6.69892e+07
cbdbA824	Q3ZXL9	Imidazoleglycerol-phosphate dehydratase OS=Dehalococcoides mccartyi (strain CBDB1) GN=hisB PE=3 SV=1	FALSE	0	105.099	58	12	243	12	1	196	21.3	6.54	High	High	High	High	High	High	High	High	High	High	High	High	1.26767e+07	2.72618e+07	4.48974e+07	3.29631e+08	2.82822e+08	4.36982e+07	1.53906e+08	1.97864e+08	3.09425e+08	1.128e+07	4.5556e+07	6.80721e+07
cbdbA1370	Q3ZYU2	Putative transaldolase OS=Dehalococcoides mccartyi (strain CBDB1) GN=tal PE=3 SV=1	FALSE	0	105.003	48	11	213	11	1	216	23.4	6.54	High	High	High	High	High	High	High	High	High	High	High	High	3.06394e+07	2.80613e+07	5.92994e+07	1.00176e+08	3.15885e+08	6.35629e+07	1.08447e+08	9.16762e+07	1.83519e+08	2.25112e+07	2.06302e+07	1.20184e+08
cbdbA1613	Q3ZW15	Hypothetical upf0313 protein OS=Dehalococcoides mccartyi (strain CBDB1) GN=cbdbA1613 PE=4 SV=1	FALSE	0	104.759	47	22	80	22	1	583	66.3	9.23	Not Found	High	Not Found	High	High	High	High	High	High	Not Found	Not Found	High		4.3228e+06		2.08427e+07	1.85177e+07	4.87893e+06	2.41025e+07	4.33253e+07	5.25132e+06			1.63316e+07
cbdbA1135	Q3ZYA2	Acetyltransferase, GNAT family OS=Dehalococcoides mccartyi (strain CBDB1) GN=cbdbA1135 PE=4 SV=1	FALSE	0	104.539	64	15	150	15	1	163	17.8	4.83	High	High	High	High	High	High	High	High	High	High	High	High	2.59329e+07	2.74033e+07	9.06237e+07	5.0705e+07	7.44995e+07	1.90172e+07	9.52107e+06	8.60049e+07	1.08569e+08	2.73136e+07	5.50701e+07	5.95772e+07
cbdbA320	Q3ZZC2	Elongation factor Ts OS=Dehalococcoides mccartyi (strain CBDB1) GN=tsf PE=3 SV=1	FALSE	0	104.483	52	12	320	12	1	167	18.4	5.29	High	High	High	High	High	High	High	High	High	High	High	High	2.07146e+08	8.83433e+07	7.89525e+07	8.17728e+08	1.05412e+09	1.90203e+08	6.76951e+08	8.66666e+08	5.15788e+08	2.81173e+07	1.45582e+08	3.22253e+08
cbdbA482	Q3ZZT2	S-methyl-5'-thioadenosine phosphorylase OS=Dehalococcoides mccartyi (strain CBDB1) GN=mtaP PE=3 SV=1	FALSE	0	104.363	54	11	184	11	1	294	31.9	6.95	High	High	Not Found	High	High	High	High	High	High	High	High	High		5.13679e+07		1.47411e+08	1.69617e+08	9.04659e+07	1.22191e+08	153770869	2.27708e+08	1.14415e+07	3.76033e+07	1.1752e+08
cbdbA1026	Q3ZY07	DNA repair protein RecN OS=Dehalococcoides mccartyi (strain CBDB1) GN=recN PE=3 SV=1	FALSE	0	103.797	44	18	107	18	1	588	65	5.38	Not Found	Not Found	Not Found	High	High	Not Found	High	High	High	Not Found	Not Found	High				4.81546e+07	5.57448e+07		4.14155e+07	5.12823e+07	7.71896e+06			2.29776e+07
cbdbA226	Q3ZWT5	ABC transporter, ATP-binding protein OS=Dehalococcoides mccartyi (strain CBDB1) GN=cbdbA226 PE=3 SV=1	FALSE	0	102.382	35	20	111	20	1	663	74.7	7.8	Not Found	Not Found	Not Found	High	High	Not Found	High	High	High	Not Found	Not Found	High				7.8297e+07	8.55346e+07		6.00316e+07	4.7277e+07	3.62328e+07			1.00812e+07
cbdbA368	Q3ZZI3	Uncharacterized protein OS=Dehalococcoides mccartyi (strain CBDB1) GN=cbdbA368.1 PE=4 SV=1	FALSE	0	101.493	73	8	275	8	1	95	10.7	7.5	High	High	High	High	High	High	High	High	High	High	High	High	1.33762e+08	7.84495e+07	1.63574e+08	6.1054e+08	8.91968e+08	1.01946e+08	5.00017e+08	5.31314e+08	5.50154e+08	7.43396e+07	7.13697e+07	5.27612e+08
cbdbA40	Q3ZWE0	Uncharacterized protein OS=Dehalococcoides mccartyi (strain CBDB1) GN=cbdbA40 PE=4 SV=1	FALSE	0	101.444	60	14	118	14	1	209	23.7	5.25	High	High	High	High	High	High	High	High	High	Not Found	High	High	1.57756e+07	1.32261e+07	5.42732e+06	5.29369e+07	4.60061e+07	1.49914e+07	2.22399e+07	4.74449e+07	3.46194e+07		1.05653e+07	3.39018e+07
cbdbA520	Q3ZZV4	Amidohydrolase family protein OS=Dehalococcoides mccartyi (strain CBDB1) GN=cbdbA520 PE=4 SV=1	FALSE	0	101.219	41	13	107	13	1	397	42.3	6.11	High	High	Not Found	High	High	High	High	High	High	Not Found	High	High	2.11645e+07	1.01356e+07		1.00354e+07	1.46438e+08	3.21413e+07	1.92124e+08	5.90616e+07	4.64575e+07		1.51104e+07	2.4184e+07
cbdbA1249	Q3ZYK6	ATPase, AAA family OS=Dehalococcoides mccartyi (strain CBDB1) GN=cbdbA1249 PE=4 SV=1	FALSE	0	100.879	43	16	57	16	1	457	50.7	6.65	Not Found	Not Found	Not Found	High	High	Not Found	High	High	High	Not Found	Not Found	High				9.26298e+06	2.93823e+07		2.54976e+07	2.75312e+07	2.72328e+07			5.40655e+06
cbdbA1348	Q3ZYR5	DNA-directed DNA polymerase I OS=Dehalococcoides mccartyi (strain CBDB1) GN=polA PE=3 SV=1	FALSE	0	100.681	30	20	59	20	1	903	99.9	5.92	Not Found	Not Found	Not Found	High	High	High	High	High	High	Not Found	Not Found	High				2.64046e+07	7.5023e+06	3.7709e+06	1.76081e+07	2.09645e+07	7.48708e+06			8.68425e+06
cbdbA1522	Q3ZZ75	Putative CRISPR-associated helicase Cas3 OS=Dehalococcoides mccartyi (strain CBDB1) GN=cas3 PE=4 SV=1	FALSE	0	99.772	27	18	72	18	1	897	100.9	6.11	Not Found	Not Found	Not Found	High	High	High	High	High	High	Not Found	Not Found	High				1.56672e+07	8.96535e+06	5.11483e+06	2.21795e+07	3.28751e+07	1.52958e+07			9.80836e+06
cbdbA754	Q3ZXD7	tRNA-specific 2-thiouridylase MnmA OS=Dehalococcoides mccartyi (strain CBDB1) GN=mnmA PE=3 SV=1	FALSE	0	99.705	49	15	150	15	1	357	39.1	6.7	Not Found	Not Found	High	High	High	Not Found	High	High	High	High	Not Found	High			3.00923e+07	7.8615e+07	9.36038e+07		4.66876e+07	5.50711e+07	8.53128e+07	3.90074e+06		2.59431e+07
cbdbA1180	Q3ZYG3	Acetylglutamate kinase OS=Dehalococcoides mccartyi (strain CBDB1) GN=argB PE=3 SV=1	FALSE	0	99.427	60	11	159	11	1	272	28.1	6.8	Not Found	High	High	High	High	High	High	High	High	High	High	High		7.30174e+06	9.61569e+06	9.2607e+07	2.50055e+08	6.75488e+06	1.99159e+08	5.89751e+07	3.02389e+08	7.33775e+06	5.33743e+06	7.95468e+07
cbdbA1159	Q3ZYD0	Peptidyl-prolyl cis-trans isomerase OS=Dehalococcoides mccartyi (strain CBDB1) GN=ppiB PE=3 SV=1	FALSE	0	99.302	70	12	340	12	1	208	22.4	7.94	High	High	High	High	High	High	High	High	High	High	High	High	9.82915e+07	8.61996e+07	1.7213e+08	9.48081e+08	9.35656e+08	8.56416e+07	5.04707e+08	6.10304e+08	5.82906e+08	1.11451e+08	5.4588e+07	3.41377e+08
cbdbA1742	Q3ZZW0	Methionyl-tRNA formyltransferase OS=Dehalococcoides mccartyi (strain CBDB1) GN=fmt PE=3 SV=1	FALSE	0	99.239	66	15	154	15	1	312	34.1	6.6	High	High	High	High	High	High	High	High	High	High	High	High	7.11657e+06	7.0197e+06	1.3626e+07	8.47194e+07	6.39264e+07	9.20048e+06	1.02169e+08	8.47093e+07	1.09452e+08	8.94914e+06	1.08925e+07	6.35591e+07
cbdbA799	Q3ZXJ2	Conserved domain protein OS=Dehalococcoides mccartyi (strain CBDB1) GN=cbdbA799 PE=4 SV=1	FALSE	0	99.007	55	13	127	13	1	196	22.6	5.78	High	High	Not Found	High	High	High	High	High	High	Not Found	Not Found	High		9.41104e+07		8.47143e+07	8.27998e+07	1.09871e+08	8.94698e+07	8.28151e+07	8.59571e+07			3.15711e+07
cbdbA1548	Q3ZVS7	DNA-binding response regulator, LuxR family OS=Dehalococcoides mccartyi (strain CBDB1) GN=rdhD PE=4 SV=1	FALSE	0	98.873	71	18	124	18	1	238	26.7	8.31	Not Found	Not Found	High	High	High	High	High	High	High	Not Found	High	High			8.37683e+06	4.82877e+07	6.76175e+07	2.64696e+07	3.51392e+07	4.24605e+07	9.97596e+07		9.86366e+06	3.79004e+07
cbdbA496	Q3ZZS2	TldD OS=Dehalococcoides mccartyi (strain CBDB1) GN=cbdbA496 PE=4 SV=1	FALSE	0	98.491	34	14	152	14	1	458	50.5	6.67	High	High	High	High	High	High	High	High	High	Not Found	High	High	7.16277e+07	1.10099e+08	3.29902e+07	1.29047e+08	3.54422e+07	2.22466e+08	1.26163e+08	1.16136e+08	6.3408e+07		1.17685e+08	6.99271e+07
cbdbA982	Q3ZXZ8	Uncharacterized protein OS=Dehalococcoides mccartyi (strain CBDB1) GN=cbdbA982 PE=4 SV=1	FALSE	0	98.395	87	13	214	13	1	78	8.8	6.52	High	High	High	High	High	High	High	High	High	High	Not Found	High	6.83374e+07	6.01328e+07	9.61589e+07	1.24374e+09	1.39849e+09	2.35025e+07	1.06089e+09	1.15225e+09	9.24181e+08	1.09797e+08		3.64503e+08
cbdbA658	Q3ZX42	Carbon monoxide dehydrogenase nickel-insertion accessory protein OS=Dehalococcoides mccartyi (strain CBDB1) GN=acsF PE=4 SV=1	FALSE	0	98.307	48	13	124	13	1	260	28.4	7.4	High	High	High	High	High	Not Found	High	High	High	Not Found	High	High	6.95666e+06		8.89447e+06	8.68076e+07	5.03388e+07		3.502e+07	4.25657e+07	6.55636e+07		7.60247e+06	3.34216e+07
cbdbA1738	Q3ZZW3	30S ribosomal protein S20 OS=Dehalococcoides mccartyi (strain CBDB1) GN=rpsT PE=3 SV=1	FALSE	0	98.151	39	6	162	6	1	88	9.6	10.7	Not Found	Not Found	Not Found	High	High	Not Found	High	High	High	Not Found	Not Found	High				5.02914e+08	2.37776e+08		3.0651e+08	4.20593e+08	4.99616e+08			2.12872e+08
cbdbA1444	Q3ZZ15	Anthranilate phosphoribosyltransferase OS=Dehalococcoides mccartyi (strain CBDB1) GN=trpD PE=3 SV=1	FALSE	0	97.905	37	12	109	12	1	341	35.7	6.1	High	High	High	High	High	High	High	High	High	Not Found	High	High	7.7671e+07		7.06038e+06	5.15257e+07	4.43264e+07	1.2415e+08	7.84136e+07	3.42081e+07	2.17302e+07		1.68372e+07	4.25871e+07
cbdbA335	Q3ZZD5	Heptaprenyl diphosphate synthase component II OS=Dehalococcoides mccartyi (strain CBDB1) GN=hepT PE=3 SV=1	FALSE	0	97.472	52	16	116	16	1	326	35.6	5.47	High	Not Found	High	High	High	High	High	High	High	High	Not Found	High	1.04273e+07		8790611	6.8651e+07	6.66453e+07		4.05537e+07	6.49752e+07	6.03257e+07	4.72108e+06		3.09973e+07
cbdbA1459	Q3ZZ02	Peptide ABC transporter, ATP-binding protein OS=Dehalococcoides mccartyi (strain CBDB1) GN=cbdbA1459 PE=4 SV=1	FALSE	0	97.15	66	13	132	13	1	322	35.1	6.6	High	High	High	High	High	High	High	High	High	Not Found	High	High	6.05076e+06	4.70986e+06	5.52318e+06	2.21873e+08	3.22872e+08	6.00709e+06	5.44265e+07	6.12365e+07	48631605		4.45081e+06	6.83616e+06
cbdbA1104	Q3ZY83	Riboflavin synthase, alpha subunit OS=Dehalococcoides mccartyi (strain CBDB1) GN=ribE PE=4 SV=1	FALSE	0	96.398	69	10	108	10	1	205	22.2	7.61	High	High	High	High	High	High	High	High	High	Not Found	High	High	3.25239e+07	3.7765e+07	6.78071e+06	4.37171e+07	1.18343e+08	1.91266e+07	3.57689e+07	4.23445e+07	8.26605e+07		2.28666e+07	3.28013e+07
cbdbA429	Q3ZZN3	Shikimate dehydrogenase (NADP(+)) OS=Dehalococcoides mccartyi (strain CBDB1) GN=aroE PE=3 SV=1	FALSE	0	96.047	33	12	172	12	1	286	31.3	8.06	High	High	High	High	High	High	High	High	High	High	High	High	5.14479e+07	8.77582e+07	4.72262e+07	1.50988e+08	2.35423e+08	1.41366e+08	1.70611e+08	1.57341e+08	2.34952e+08	5.77808e+06	8.69369e+07	6.52696e+07
cbdbA689	Q3ZXA4	Oxidoreductase, short chaindehydrogenase OS=Dehalococcoides mccartyi (strain CBDB1) GN=cbdbA689 PE=3 SV=1	FALSE	0	95.828	60	13	144	13	1	264	27.3	6.81	High	High	High	High	High	High	High	High	High	High	High	High	2.63274e+07	1.21093e+08	3.48151e+07	8.10226e+07	6.60711e+07	7.39019e+07	2.94401e+07	1.84678e+08	6.3925e+07	2.57369e+07	1.49881e+08	1.69864e+07
cbdbA1681	Q3ZW59	Quinolinate synthase A OS=Dehalococcoides mccartyi (strain CBDB1) GN=nadA PE=3 SV=1	FALSE	0	95.794	50	12	116	12	1	302	33.2	7.4	High	High	High	High	High	High	High	High	High	Not Found	High	High	1.04178e+07	7.65183e+06	2.22669e+07	6.21936e+07	9.62426e+07	1.96098e+07	3.0435e+07	2.85878e+07	1.45664e+08		8.08683e+06	2.58444e+07
cbdbA1113	Q3ZY97	Aspartate carbamoyltransferase OS=Dehalococcoides mccartyi (strain CBDB1) GN=pyrB PE=3 SV=1	FALSE	0	95.764	55	16	152	16	1	331	36.3	6.96	High	High	High	High	High	High	High	High	High	Not Found	High	High	5.5456e+06	1.17098e+07	1.63832e+07	4.38611e+07	5.53073e+07	1.45234e+07	5.24745e+07	7.44078e+07	4.09728e+07		1.68959e+07	2.71845e+07
cbdbA1426	Q3ZYY7	Putative ribosomal subunit interface protein OS=Dehalococcoides mccartyi (strain CBDB1) GN=cbdbA1426 PE=4 SV=1	FALSE	0	95.76	56	12	190	12	1	179	20.8	8.62	Not Found	Not Found	High	High	High	High	High	High	High	Not Found	Not Found	High			1.62554e+07	2.55004e+08	1.63005e+08	3.43522e+07	6.6804e+08	6.68596e+08	1.99051e+09			2.54155e+08
cbdbA417	Q3ZZJ1	Acetyltransferase, GNAT family OS=Dehalococcoides mccartyi (strain CBDB1) GN=cbdbA417 PE=4 SV=1	FALSE	0	94.101	56	10	135	10	1	158	17.8	6.52	High	High	High	High	High	High	High	High	High	High	Not Found	High	9.9693e+06	1.21339e+07	6.44264e+06	1.88735e+08	3.27165e+08	1.41907e+07	1.63024e+08	1.06281e+08	1.9035e+08	6.6841e+06		6.43613e+07
cbdbA1	Q3ZW90	Chromosomal replication initiator protein DnaA OS=Dehalococcoides mccartyi (strain CBDB1) GN=dnaA PE=3 SV=1	FALSE	0	94.046	36	12	80	12	1	444	49.7	6.81	Not Found	High	Not Found	High	High	High	High	High	High	Not Found	High	High		6.6622e+06		7.30052e+07	5.06933e+07	7.07442e+06	9.41341e+07	3.55617e+07	7.13366e+06		2.31961e+06	1.78367e+07
cbdbA323	Q3ZZC0	Phosphoribosylformylglycinamidine synthase subunit PurQ OS=Dehalococcoides mccartyi (strain CBDB1) GN=purQ PE=4 SV=1	FALSE	0	93.973	46	12	110	12	1	255	27.8	8.4	Not Found	High	Not Found	High	High	High	High	High	High	Not Found	High	High		785055		7.35369e+07	6.90332e+07	2.34027e+06	8.53033e+07	7.93692e+07	9.39111e+07		2.1877e+06	3.05042e+07
cbdbA268	Q3ZWU7	Uncharacterized protein OS=Dehalococcoides mccartyi (strain CBDB1) GN=cbdbA268 PE=4 SV=1	FALSE	0	93.937	51	15	118	15	1	401	44.9	6.47	High	High	High	High	High	High	High	High	High	High	High	High	1.09339e+07	1.36871e+07	8.4507e+06	5.99959e+07	5.65195e+07	1.21411e+07	6.43724e+07	6.63674e+07	1.06437e+08	2.52064e+06	9.23396e+06	7.32658e+06
cbdbA267	Q3ZWU8	Uncharacterized protein OS=Dehalococcoides mccartyi (strain CBDB1) GN=cbdbA267 PE=4 SV=1	FALSE	0	93.507	76	10	193	10	1	199	21.7	6.52	High	High	High	High	High	High	High	High	High	High	High	High	6.7789e+07	5.01344e+07	2.92174e+07	1.40218e+08	1.93274e+08	3.64783e+07	2.13267e+08	5.25489e+07	6.64546e+07	3.3593e+07	4.28211e+07	9.84434e+07
cbdbA181	Q3ZWM2	Putative threonine aldolase (COG2008) OS=Dehalococcoides mccartyi (strain CBDB1) GN=gly1 PE=4 SV=1	FALSE	0	92.99	51	12	93	12	1	344	36.7	7.46	Not Found	Not Found	High	High	High	Not Found	High	High	High	Not Found	Not Found	High			8.09481e+06	1.25084e+07	5.78487e+06		4.53618e+07	2.7471e+07	1.8173e+08			1.49846e+07
cbdbA1727	Q3ZZX2	Radical SAM domain protein OS=Dehalococcoides mccartyi (strain CBDB1) GN=cbdbA1727 PE=4 SV=1	FALSE	0	92.637	34	16	91	16	1	610	68.1	5.94	High	High	High	High	High	High	High	High	High	Not Found	High	High	9.79008e+06	7.93117e+06	8.68475e+06	1.37376e+07	1.34773e+07	7.34995e+06	2.30336e+07	2.3029e+07	6.34179e+06		1.63439e+07	1.1446e+07
cbdbA416	Q3ZZJ2	MutT OS=Dehalococcoides mccartyi (strain CBDB1) GN=cbdbA416 PE=4 SV=1	FALSE	0	92.283	55	10	206	10	1	176	19.6	5	High	High	High	High	High	High	High	High	High	Not Found	High	High	9.4181e+06	1.45757e+08	1.38911e+08	2.14814e+08	2.50753e+08	1.28619e+08	1.29066e+08	3.53136e+08	3.71195e+08		160498889	6.22613e+07
cbdbA539	Q3ZZT6	ATP synthase epsilon chain OS=Dehalococcoides mccartyi (strain CBDB1) GN=atpC PE=3 SV=1	FALSE	0	91.394	54	12	156	12	1	140	15.3	6.34	Not Found	High	High	High	High	Not Found	High	High	High	High	High	High		1.69913e+07	7.34544e+06	2.38655e+08	5.22289e+08		2.67436e+08	2.77583e+08	2.1753e+08	3.7278e+06	2.31108e+07	4.87083e+07
cbdbA467	Q3ZZP5	50S ribosomal protein L17 OS=Dehalococcoides mccartyi (strain CBDB1) GN=rplQ PE=3 SV=1	FALSE	0	91.072	74	11	242	11	1	117	13.5	10.27	High	High	High	High	High	High	High	High	High	High	High	High	2.78681e+07	3.20699e+07	1.19371e+08	1.726e+09	1.687e+09	5.4705e+07	3.49075e+08	1.09229e+09	1.40921e+09	7.12327e+07	5.31015e+07	4.26507e+08
cbdbA933	Q3ZXV5	4-hydroxy-tetrahydrodipicolinate reductase OS=Dehalococcoides mccartyi (strain CBDB1) GN=dapB PE=3 SV=1	FALSE	0	90.833	49	11	92	11	1	263	28.1	6.74	Not Found	High	Not Found	High	High	Not Found	High	High	High	Not Found	High	High		2.5742e+06		4.77277e+07	1.22586e+08		1.40972e+08	7.80811e+07	1.01164e+08		5.00506e+06	6.11953e+07
cbdbA1635	Q3ZVZ8	Uncharacterized protein OS=Dehalococcoides mccartyi (strain CBDB1) GN=cbdbA1635 PE=4 SV=1	FALSE	0	90.787	50	8	194	8	1	277	30.6	4.96	High	High	High	High	High	High	High	High	High	High	High	High	7.197e+07	5.20144e+07	6.67454e+07	2.27743e+09	2.65347e+09	8.18278e+07	2.24482e+09	1.9001e+09	1.56078e+09	5.60735e+07	4.14967e+07	2.88022e+08
cbdbA380	Q3ZZH2	Carbohydrate kinase, yjeF-family OS=Dehalococcoides mccartyi (strain CBDB1) GN=cbdbA380 PE=3 SV=1	FALSE	0	90.425	41	16	158	16	1	512	53.3	5.16	High	High	Not Found	High	High	High	High	High	High	Not Found	High	High	6.76144e+06	7.09089e+06		6.01457e+07	4.12387e+07	7.53655e+06	5.98754e+07	8.08113e+07	6.74094e+07		1.07619e+07	1.65501e+07
cbdbA344	Q3ZZF5	Glycoprotease family protein OS=Dehalococcoides mccartyi (strain CBDB1) GN=cbdbA344 PE=4 SV=1	FALSE	0	90.312	47	14	93	14	1	456	49.2	6.35	High	High	High	High	High	High	High	High	High	Not Found	Not Found	High	1.17952e+07		3.85856e+06	2.99396e+07	2.02706e+07	1.3657e+07	4.25298e+07	6.15133e+07	2.32671e+07			2.65142e+07
cbdbA136	Q3ZWL0	ABC transporter, ATP-binding protein OS=Dehalococcoides mccartyi (strain CBDB1) GN=cbdbA136 PE=3 SV=1	FALSE	0	89.78	35	11	91	11	1	288	32	6.4	Not Found	Not Found	Not Found	High	High	High	High	High	High	High	Not Found	High				4.51088e+07	2.66662e+07	4.99602e+06	6.37889e+07	5.58083e+07	6.49681e+07	2.35556e+06		3.50623e+07
cbdbA446	Q3ZZL7	50S ribosomal protein L16 OS=Dehalococcoides mccartyi (strain CBDB1) GN=rplP PE=3 SV=1	FALSE	0	89.498	69	12	273	12	1	149	16.7	10.74	High	High	High	High	High	High	High	High	High	High	High	High	7.48578e+07	9.56004e+07	7.29474e+06	1.24094e+09	9.59273e+08	1.24282e+07	2.91382e+08	2.29945e+08	5.45892e+08	3.12736e+07	7.1954e+07	1.36164e+08
cbdbA759	Q3ZXD3	Translin family protein OS=Dehalococcoides mccartyi (strain CBDB1) GN=cbdbA759 PE=4 SV=1	FALSE	0	89.462	61	11	162	11	1	210	23.6	4.97	High	High	Not Found	High	High	High	High	High	High	Not Found	High	High	4.07041e+07	1.75174e+07		208697316	1.84764e+08	4.51653e+07	1.8308e+08	1.68613e+08	2.89163e+08		5.22215e+07	1.20921e+08
cbdbA1270	Q3ZYN5	50S ribosomal protein L21 OS=Dehalococcoides mccartyi (strain CBDB1) GN=rplU PE=3 SV=1	FALSE	0	89.322	74	9	179	9	1	132	14.1	9.31	High	High	High	High	High	High	High	High	High	High	High	High	4.98118e+07	4.98689e+07	7.80915e+07	3.0464e+08	3.70765e+08	1.19215e+08	1.50802e+07	1.63298e+08	8.35241e+06	4.32605e+07	7.55894e+07	1.51206e+08
cbdbA5	Q3ZW91	GTP pyrophosphokinase OS=Dehalococcoides mccartyi (strain CBDB1) GN=relA PE=3 SV=1	FALSE	0	89.229	26	20	94	20	1	728	82.2	7.4	Not Found	Not Found	Not Found	High	High	Not Found	High	High	High	Not Found	High	High				4.27248e+07	5.29334e+07		4.81189e+07	2.42632e+07	3.29792e+07		2.53905e+07	6.37555e+06
cbdbA1241	Q3ZYL2	Fasciclin domain protein OS=Dehalococcoides mccartyi (strain CBDB1) GN=cbdbA1241 PE=4 SV=1	FALSE	0	88.993	86	9	135	9	1	134	14.6	5.77	High	High	High	High	High	High	High	High	High	High	High	High	1.45704e+07	3.47049e+07	3.16445e+07	4.9792e+07	9.27068e+07	5.46193e+07	8.36342e+07	6.10355e+07	2.65471e+08	3.76267e+07	4.26358e+07	8.80879e+07
cbdbA1191	Q3ZYF5	DegV family protein OS=Dehalococcoides mccartyi (strain CBDB1) GN=cbdbA1191 PE=4 SV=1	FALSE	0	88.895	36	9	229	9	1	280	30.3	7.43	High	High	High	High	High	High	High	High	High	Not Found	High	High	7.49416e+07	6.99945e+07	6.093e+07	8.60788e+07	5.49757e+07	1.25618e+08	1.51548e+08	2.16717e+08	312766504		1.04645e+08	1.2054e+08
cbdbA872	Q3ZXP8	Uncharacterized protein OS=Dehalococcoides mccartyi (strain CBDB1) GN=cbdbA872 PE=4 SV=1	FALSE	0	88.777	36	13	148	13	1	408	43.9	7.44	High	High	Not Found	High	High	High	High	High	High	Not Found	High	High	1.13778e+07	2.32428e+07		1.74743e+08	2.83815e+08	6.11552e+07	1.57178e+08	2.11292e+08	2.27057e+08		3.6065e+07	1.01974e+08
cbdbA500	Q3ZZR9	Glucose-1-phosphate thymidylyltransferase OS=Dehalococcoides mccartyi (strain CBDB1) GN=cbdbA500 PE=4 SV=1	FALSE	0	88.773	42	13	94	13	1	393	41.9	8.03	High	High	High	High	High	High	High	High	High	High	High	High	3.27494e+07	5.28903e+07	2.65031e+06	1.93343e+07	7.90872e+06	4.20848e+07	3.56936e+07	7.58883e+07	1.91209e+07	3.39913e+06	4.82946e+06	2.56009e+07
cbdbA1695	Q3ZW47	Sec-independent protein translocase protein TatA OS=Dehalococcoides mccartyi (strain CBDB1) GN=tatA PE=3 SV=1	FALSE	0	87.714	54	7	132	7	1	65	7	5.4	Not Found	Not Found	Not Found	High	High	Not Found	High	High	High	Not Found	Not Found	High				5.37432e+07	3.11966e+07		8.35897e+06	9.23324e+07	3.56648e+07			2.1192e+08
cbdbA353	Q3ZZE8	SAM-dependent methyltransferase UbiE/COQ5 family OS=Dehalococcoides mccartyi (strain CBDB1) GN=cbdbA353 PE=4 SV=1	FALSE	0	87.607	71	12	116	12	1	200	23.1	7.88	High	High	Not Found	High	High	High	High	High	High	Not Found	High	High	1.75554e+07	1.87014e+07		4.82688e+07	1.27108e+08	1.94965e+07	7.5255e+07	1.36991e+08	2.12866e+07		1.62721e+07	3.35203e+07
cbdbA1735	Q3ZZW5	MazG family protein OS=Dehalococcoides mccartyi (strain CBDB1) GN=cbdbA1735 PE=4 SV=1	FALSE	0	87.277	51	11	98	11	1	261	29.9	5.25	Not Found	Not Found	Not Found	High	High	Not Found	High	High	High	Not Found	Not Found	High				3.86798e+07	5.9041e+07		2.59451e+07	2.67628e+07	1.94965e+07			1.04745e+07
cbdbA584	Q3ZX02	Riboflavin biosynthesis protein RibF OS=Dehalococcoides mccartyi (strain CBDB1) GN=ribF PE=4 SV=1	FALSE	0	87.149	48	14	141	14	1	305	33.7	6.86	Not Found	Not Found	Not Found	High	High	High	High	High	High	High	High	High				1.39291e+08	2.10903e+08	1.60497e+07	1.17029e+08	1.00533e+08	1.38585e+08	1.56093e+07	1.66632e+07	5.32196e+07
cbdbA1709	Q3ZW75	HIT domain protein OS=Dehalococcoides mccartyi (strain CBDB1) GN=cbdbA1709 PE=4 SV=1	FALSE	0	86.76	69	9	84	9	1	163	18.8	8.43	High	High	High	High	High	High	High	High	High	Not Found	High	High	5.22954e+06	5.21128e+06		8.05691e+07	4.93142e+07		1.9872e+07	1.30005e+08	1.27488e+08		7.58954e+06	2.79441e+07
cbdbA1057	Q3ZY29	Imidazole glycerol phosphate synthase subunit HisF OS=Dehalococcoides mccartyi (strain CBDB1) GN=hisF PE=3 SV=1	FALSE	0	86.608	60	15	141	15	1	253	27.2	5.8	Not Found	Not Found	High	High	High	Not Found	High	High	High	Not Found	High	High			7.86865e+06	1.15419e+08	1.19785e+08		8.19194e+07	5.79949e+07	1.03171e+08		1.09376e+07	6.10384e+07
cbdbA906	Q3ZXT4	NifU domain protein OS=Dehalococcoides mccartyi (strain CBDB1) GN=cbdbA906 PE=4 SV=1	FALSE	0	86.361	63	5	134	5	1	127	13.9	7.24	Not Found	Not Found	High	High	High	Not Found	High	High	High	Not Found	Not Found	High				5.11061e+07	5.00593e+07		5.21299e+07	8.27614e+07	1.09121e+08			1.99856e+07
cbdbA274	Q3ZWU2	Protein translocase subunit SecD OS=Dehalococcoides mccartyi (strain CBDB1) GN=secD PE=3 SV=1	FALSE	0	86.305	22	11	135	11	1	449	48.2	4.97	High	High	High	High	High	High	High	High	High	High	High	High	3.33333e+07	1.71256e+07	1.11341e+07	3.41558e+08	2.294e+08	3.21247e+07	1.58349e+08	2.345e+08	1.56192e+08	5.93175e+06	3.03558e+07	1.09561e+08
cbdbA995	Q3ZXY8	Uncharacterized protein OS=Dehalococcoides mccartyi (strain CBDB1) GN=cbdbA995 PE=4 SV=1	FALSE	0	86.291	52	5	199	5	1	46	5.3	10.08	Not Found	High	Not Found	High	High	High	High	High	High	Not Found	Not Found	High		1.62719e+07		3.05499e+08	3.85623e+08	2.09136e+07	2.42375e+08	1.95038e+08	6.02428e+08			2.75327e+08
cbdbA725	Q3ZXB6	Translation initiation factor IF-3 OS=Dehalococcoides mccartyi (strain CBDB1) GN=infC PE=3 SV=1	FALSE	0	85.913	56	9	136	9	1	157	17.7	9.99	Not Found	High	High	High	High	High	High	High	High	High	High	High			3.16676e+07	1.32936e+08	1.15283e+08	4.66115e+07	8.38023e+07	9.9365e+07	1.30713e+08	5.16505e+06	3.52174e+06	2.06265e+07
cbdbA610	Q3ZX27	Response regulator OS=Dehalococcoides mccartyi (strain CBDB1) GN=cbdbA610 PE=4 SV=1	FALSE	0	85.779	52	13	62	13	1	319	35.6	5.94	Not Found	Not Found	Not Found	High	High	Not Found	High	Not Found	Not Found	Not Found	Not Found	High				7.33498e+07	1.00702e+08		2.18661e+07					1.15837e+07
cbdbA493	Q3ZZS4	Uncharacterized protein OS=Dehalococcoides mccartyi (strain CBDB1) GN=cbdbA493 PE=4 SV=1	FALSE	0	85.757	47	11	114	11	1	276	30.7	4.61	Not Found	High	High	High	High	High	High	High	High	Not Found	Not Found	High		9.94451e+07	4.63796e+07	3.82736e+07	6.20741e+07	5.75008e+07	8.70375e+07	3.68882e+07	3.52684e+07			3.26774e+07
cbdbA1608	Q3ZW20	Sensor histidine kinase/response regulator OS=Dehalococcoides mccartyi (strain CBDB1) GN=cbdbA1608 PE=4 SV=1	FALSE	0	85.725	19	17	54	15	1	852	96.2	6.33	High	Not Found	Not Found	High	High	High	High	High	Not Found	Not Found	Not Found	High	7.93675e+06			1.9061e+07	3.7138e+07	1.20873e+07	3.73982e+07	1.18108e+07				1.32409e+07
cbdbA1356	Q3ZYV3	Glycerol-3-phosphate dehydrogenase [NAD(P)+] OS=Dehalococcoides mccartyi (strain CBDB1) GN=gpsA PE=3 SV=1	FALSE	0	85.652	42	12	124	12	1	359	38.5	8.05	High	Not Found	Not Found	High	High	High	High	High	High	Not Found	Not Found	High	7.82637e+06			5.79405e+07	6.62041e+07	6.55376e+06	6.21512e+07	5.16625e+07	3.91924e+07			5.31404e+07
cbdbA1054	Q3ZY31	Uncharacterized protein OS=Dehalococcoides mccartyi (strain CBDB1) GN=cbdbA1054 PE=4 SV=1	FALSE	0	85.298	41	9	193	9	1	256	28.1	6.52	High	High	High	High	High	High	High	High	High	High	High	High	3.83843e+07	2.95357e+07	1.89851e+07	4.69287e+08	5.57367e+08	2.80315e+07	4.12371e+08	4.55592e+08	3.80651e+08	2.49086e+07	4.81632e+07	1.70632e+08
cbdbA1193	Q3ZYF3	DegV family protein OS=Dehalococcoides mccartyi (strain CBDB1) GN=cbdbA1193 PE=4 SV=1	FALSE	0	85.248	56	14	80	14	1	310	33.5	8.66	Not Found	High	Not Found	High	High	High	High	High	High	High	Not Found	High		2.85882e+06		8.31388e+07	9.95297e+07	8.06316e+06	9.93786e+07	6.2151e+07	2.38127e+07	2.3557e+06		1.93744e+07
cbdbA1164	Q3ZYC6	Putative iron-sulfur flavoprotein OS=Dehalococcoides mccartyi (strain CBDB1) GN=cbdbA1164 PE=4 SV=1	FALSE	0	85.205	48	13	154	13	1	190	20.7	8.91	Not Found	High	High	High	High	High	High	High	High	Not Found	Not Found	High		2.11745e+07	6.98373e+06	506029105	7.41698e+08	1.70146e+07	9.16739e+07	1.93139e+08	2.28496e+08			6.3981e+07
cbdbA567	Q3ZWW7	Uncharacterized protein OS=Dehalococcoides mccartyi (strain CBDB1) GN=cbdbA567 PE=4 SV=1	FALSE	0	85.198	77	12	126	12	1	124	13.9	6.13	High	Not Found	High	High	High	High	High	High	High	Not Found	High	High	1.57678e+08		2.0705e+08	6.82375e+08	8.80418e+08	1.69547e+08	16834715	7.02007e+08	6.61401e+08		1.87431e+08	2.59495e+08
cbdbA83	Q3ZWF6	DNA-binding response regulator OS=Dehalococcoides mccartyi (strain CBDB1) GN=rdhD PE=4 SV=1	FALSE	0	84.996	62	12	106	12	1	233	26.5	8.78	High	High	Not Found	High	High	High	High	High	High	Not Found	High	High	1.23972e+07	1.04042e+07		5.23609e+07	8.66075e+07	1.36037e+07	4.88705e+07	6.90954e+07	2.04041e+07		5.73894e+06	4.24166e+07
cbdbA1457	Q3ZZ04	Thymidylate synthase ThyX OS=Dehalococcoides mccartyi (strain CBDB1) GN=thyX PE=3 SV=1	FALSE	0	84.544	70	14	146	14	1	195	22.2	7.46	High	High	High	High	High	High	High	High	High	Not Found	High	High	5.7848e+07	3.39752e+07	4.46249e+06	1.35088e+08	156270641	4.94893e+07	7.88775e+07	8.90661e+07	1.42016e+08		2.36896e+07	2.63997e+07
cbdbA464	Q3ZZP8	30S ribosomal protein S11 OS=Dehalococcoides mccartyi (strain CBDB1) GN=rpsK PE=3 SV=1	FALSE	0	84.526	44	9	357	9	1	130	13.7	11.08	High	High	High	High	High	High	High	High	High	High	High	High	1.04791e+08	1.27704e+08	1.32913e+08	1.79931e+09	1.72478e+09	1.66616e+08	1.19118e+09	1.21842e+09	1.35218e+09	9.50423e+07	1.33222e+08	5.33533e+08
#N/A	Q3ZZG0	Deoxyuridine 5'-triphosphatenucleotidohydrolase OS=Dehalococcoides mccartyi (strain CBDB1) GN=dut PE=4 SV=1	FALSE	0	84.277	85	12	124	12	1	170	18.9	7.14	High	High	High	High	High	High	High	High	High	High	Not Found	High	1.03262e+07	1.02845e+07	4.55212e+06	7.19499e+07	8.74713e+07	1.27269e+07	3.07717e+07	7.03302e+07	9.42633e+07	1.5045e+07		4.05078e+07
cbdbA576	Q3ZX09	Peptidyl-tRNA hydrolase OS=Dehalococcoides mccartyi (strain CBDB1) GN=pth PE=3 SV=1	FALSE	0	84.256	70	11	51	11	1	189	20.4	8.57	Not Found	Not Found	Not Found	High	High	High	High	High	High	Not Found	High	High				2.40357e+07	6.17639e+07	2.35094e+06	1.98057e+07	1.48277e+07	2.12732e+07		4.72137e+06	1.12324e+07
cbdbA328	Q3ZZB7	Iron-sulfur cluster-binding protein, Rieske domain OS=Dehalococcoides mccartyi (strain CBDB1) GN=cbdbA328 PE=4 SV=1	FALSE	0	83.927	73	12	136	12	1	125	13.4	7.83	High	High	High	High	High	High	High	High	High	Not Found	Not Found	High		2.0561e+07	3.78333e+06	4.68568e+07	3.17618e+07	2.47763e+07	1.97289e+08	1.45099e+08	4.5778e+07			9.43237e+07
cbdbA1040	Q3ZY44	Metallo-beta-lactamase family protein OS=Dehalococcoides mccartyi (strain CBDB1) GN=cbdbA1040 PE=4 SV=1	FALSE	0	83.665	40	15	96	15	1	468	52.4	6.73	High	High	High	High	High	High	High	High	High	Not Found	Not Found	High	5.55039e+06	2.11579e+06	4.09386e+06	4.13387e+07	3.15023e+07	4.4022e+06	1.15942e+07	1.7048e+07	8.24844e+07			1.41881e+07
cbdbA289	Q3ZZ98	Uncharacterized protein OS=Dehalococcoides mccartyi (strain CBDB1) GN=cbdbA289 PE=4 SV=1	FALSE	0	83.553	55	16	133	16	1	194	22.3	8.51	High	Not Found	High	High	High	High	High	High	High	Not Found	High	High	9.93923e+06		1.51484e+07	4.93873e+07	7.19083e+07	13365532	3.73453e+07	4.22345e+07	8.52703e+07		9.96334e+06	2.05426e+07
cbdbA130	Q3ZWL4	Ni/Fe hydrogenase small subunit OS=Dehalococcoides mccartyi (strain CBDB1) GN=hupS PE=4 SV=1	FALSE	0	83.454	31	10	199	10	1	354	37.1	6.71	High	High	High	High	High	High	High	High	High	High	High	High	6.21781e+07	1.11183e+08	1.07364e+08	2.20486e+08	5.88896e+08	1.61191e+08	3.70052e+08	5.90443e+08	6.18506e+08	7.32938e+07	9.39277e+07	3.22261e+08
cbdbA34	Q3ZW95	Universal stress family protein OS=Dehalococcoides mccartyi (strain CBDB1) GN=cbdbA34 PE=4 SV=1	FALSE	0	83.285	73	11	162	11	1	142	15.6	4.96	High	High	High	High	High	High	High	High	High	High	High	High	5.34061e+07	4.33557e+07	5.42345e+07	2.38638e+07	9.0521e+07	6.38185e+07	4.23555e+07	8.55749e+07	1.41429e+08	1.25688e+07	6.74401e+07	6.26611e+07
cbdbA1253	Q3ZYK3	Uncharacterized protein OS=Dehalococcoides mccartyi (strain CBDB1) GN=cbdbA1253 PE=4 SV=1	FALSE	0	83.237	30	12	121	12	1	385	41.8	5.24	High	High	High	High	High	High	High	High	High	High	High	High	3.2216e+07	4.06501e+07	1.88316e+07	1.11656e+08	5.73547e+07	5.1345e+07	4.58397e+07	7.87099e+07	8.72451e+07	8.19529e+06	4.47968e+07	5.96345e+07
cbdbA1445	Q3ZZ14	Indole-3-glycerol phosphate synthase OS=Dehalococcoides mccartyi (strain CBDB1) GN=trpC PE=3 SV=1	FALSE	0	83.235	61	14	101	14	1	259	29	6.81	Not Found	High	Not Found	High	High	Not Found	High	High	High	Not Found	High	High				7.07634e+07	8.01358e+07		5.777e+07	4.78903e+07	7.57092e+07		4.08084e+06	5.04806e+07
cbdbA1212	Q3ZYI5	Glutamate 5-kinase OS=Dehalococcoides mccartyi (strain CBDB1) GN=proB PE=3 SV=1	FALSE	0	82.955	41	15	97	15	1	373	40.1	6.62	Not Found	Not Found	High	High	High	High	High	High	High	Not Found	Not Found	High			8.55613e+06	6.87308e+07	6.55897e+07	8.38092e+06	6.29962e+07	6.40142e+07	2.39062e+07			2.02364e+07
cbdbA1610	Q3ZW18	Uncharacterized protein OS=Dehalococcoides mccartyi (strain CBDB1) GN=cbdbA1610 PE=4 SV=1	FALSE	0	82.849	57	8	208	8	1	145	15	8.68	High	High	High	High	High	High	High	High	High	High	High	High	1.17701e+08	1.48498e+08	6.26035e+07	8.34112e+08	9.03511e+08	2.66541e+08	1.08671e+09	8.55905e+07	1.26473e+09	1.28124e+08	1.99698e+08	2.69954e+08
cbdbA660	Q3ZX40	Formate--tetrahydrofolate ligase OS=Dehalococcoides mccartyi (strain CBDB1) GN=fhs PE=3 SV=1	FALSE	0	82.674	35	17	77	17	1	597	64.5	7.08	Not Found	Not Found	Not Found	High	High	High	High	High	High	Not Found	Not Found	High				2.92193e+07	3.90118e+07	8.61434e+06	3.53937e+07	1.56765e+07	1.71787e+07			2.68638e+07
cbdbA1206	Q3ZYI9	N utilization substance protein B homolog OS=Dehalococcoides mccartyi (strain CBDB1) GN=nusB PE=3 SV=1	FALSE	0	82.589	89	12	86	12	1	143	16.2	5.36	High	High	Not Found	High	High	High	High	High	High	High	High	High	2.86903e+07	2.62636e+07		7.2725e+07	7.44839e+07	7.96505e+06	5.96261e+07	3.24827e+07	5.624e+07	4.15164e+07	28661042	5.3256e+07
cbdbA922	Q3ZXW2	Single-stranded-DNA-specific exonuclease RecJ OS=Dehalococcoides mccartyi (strain CBDB1) GN=recJ PE=4 SV=1	FALSE	0	82.214	35	15	87	15	1	566	62.5	5.95	High	Not Found	Not Found	High	High	Not Found	High	High	High	Not Found	Not Found	High	6.90728e+06			6.0353e+07	5.88699e+07		4.73169e+07	2.15402e+07	4.37949e+06			2.48556e+07
cbdbA1272	Q3ZYN3	50S ribosomal protein L31 OS=Dehalococcoides mccartyi (strain CBDB1) GN=rpmE PE=3 SV=1	FALSE	0	82.136	75	8	201	8	1	68	7.7	9.25	High	High	High	High	High	High	High	High	High	High	High	High	3.26933e+07	7.0028e+07	9.46509e+07	1.53786e+08	3.27549e+08	7.52669e+07	2.23903e+08	3.57595e+08	3.62238e+08	1.0541e+07	5.51964e+07	1.83985e+08
cbdbA649	Q3ZX47	Uncharacterized protein OS=Dehalococcoides mccartyi (strain CBDB1) GN=cbdbA649 PE=4 SV=1	FALSE	0	81.986	67	14	127	14	1	214	24.5	8.12	High	High	High	High	High	High	High	High	High	High	High	High	4.87967e+06	9.29151e+06	2.5191e+07	1.04206e+08	2.13447e+07	7.81775e+06	3.63777e+07	7.51464e+07	6.29835e+06	4.93291e+06	8.81804e+06	3.43981e+07
cbdbA1042	Q3ZY42	Sensor histidine kinase OS=Dehalococcoides mccartyi (strain CBDB1) GN=cbdbA1042 PE=4 SV=1	FALSE	0	81.273	18	18	38	18	1	1229	138.3	7.15	Not Found	High	Not Found	High	High	High	High	High	Not Found	Not Found	High	High		5.07492e+06		4.80388e+06	8.23133e+06	6.47931e+06	1.54462e+07	1.57573e+07			4.61243e+06	3.03654e+06
cbdbA45	Q3ZWD6	PyrK family protein OS=Dehalococcoides mccartyi (strain CBDB1) GN=cbdbA45 PE=4 SV=1	FALSE	0	81.119	54	12	81	12	1	282	30.5	6.54	Not Found	High	High	High	High	High	High	High	High	Not Found	High	High		7.7469e+06	5.41222e+06	3.87137e+07	2.66628e+07	1.01376e+07	4.15761e+07	2.82288e+07	3.16727e+06		1.07846e+07	3.69681e+07
cbdbA460	Q3ZZQ2	Methionine aminopeptidase OS=Dehalococcoides mccartyi (strain CBDB1) GN=map PE=3 SV=1	FALSE	0	80.973	42	12	102	12	1	251	26.9	5.64	High	High	High	High	High	High	High	High	High	High	High	High	7.25392e+06	4.35614e+06	5.52896e+06	55924466	8.5646e+07	7.8565e+06	4.91783e+07	6.76203e+07	8.15365e+07	7.80555e+06	2.24099e+06	2.67738e+07
cbdbA149	Q3ZWJ9	Cobyrinate a,c-diamide synthase OS=Dehalococcoides mccartyi (strain CBDB1) GN=cbiA PE=3 SV=1	FALSE	0	80.801	37	12	166	12	1	463	50.3	6.29	High	High	High	High	High	High	High	High	High	High	High	High	1.89394e+07	2.45611e+07	3.78306e+07	1.14613e+08	1.23549e+08	1.69546e+07	1.01461e+08	1.02926e+08	9.31108e+07	5.39686e+06	3.17669e+07	5.174e+07
cbdbA528	Q3ZZU7	Putative deoxyguanosinetriphosphate triphosphohydrolase OS=Dehalococcoides mccartyi (strain CBDB1) GN=cbdbA528 PE=4 SV=1	FALSE	0	80.745	54	16	85	16	1	345	39.1	7.46	High	High	High	High	High	High	High	High	High	High	High	High	9.22859e+06	6.58099e+06	3.28263e+07	6.30275e+07	2.35755e+07	8.56695e+06	2.88635e+07	8.75337e+07	6.80872e+07	1.71179e+06	2.86276e+06	2.09695e+07
cbdbA1039	Q3ZY45	ABC-type dipeptide/oligopeptide/nickel transport system, periplasmic component OS=Dehalococcoides mccartyi (strain CBDB1) GN=cbdbA1039 PE=4 SV=1	FALSE	0	80.661	33	15	64	15	1	558	61	4.74	Not Found	High	High	Not Found	Not Found	Not Found	High	High	High	High	High	Not Found		4.19851e+07	1.5715e+07					6.3486e+07	1.57622e+08	7.20049e+06	2.62285e+07
cbdbA1402	Q3ZYW1	Hydrogenase expression/formation protein HypE OS=Dehalococcoides mccartyi (strain CBDB1) GN=hypE PE=4 SV=1	FALSE	0	80.255	45	14	124	14	1	335	35.1	5.2	Not Found	Not Found	Not Found	High	High	Not Found	High	High	High	Not Found	High	High				1.47089e+08	1.58398e+08		1.21666e+08	1.58408e+08	1.41728e+08		1.46155e+07	5.91142e+07
cbdbA1663	Q3ZW24	Mechanosensitive ion channel family protein OS=Dehalococcoides mccartyi (strain CBDB1) GN=cbdbA1663 PE=4 SV=1	FALSE	0	79.712	28	13	112	13	1	458	49.7	6.58	High	High	High	High	High	High	High	High	High	Not Found	High	High	1.61118e+07	7.15737e+06	2.86126e+06	9.30053e+07	1.02145e+08	9.89546e+06	1.29167e+08	7.61567e+07	6.52295e+07		1.44291e+07	4.58245e+07
cbdbA907	Q3ZXT3	Uncharacterized protein OS=Dehalococcoides mccartyi (strain CBDB1) GN=cbdbA907 PE=4 SV=1	FALSE	0	79.522	52	7	150	7	1	84	9.6	8.16	High	High	High	High	High	High	High	High	High	High	High	High	1.78168e+07	1.27949e+07	2.42745e+07	224542471	1.51767e+08	4.47668e+07	1.93836e+08	2.54329e+08	3.51158e+08	6.72281e+06	2.5484e+07	4.94438e+07
cbdbA669	Q3ZX79	PHP domain protein OS=Dehalococcoides mccartyi (strain CBDB1) GN=cbdbA669 PE=4 SV=1	FALSE	0	79.362	58	10	87	10	1	219	24.2	8.51	High	High	High	High	High	High	High	High	High	High	High	High	1.69941e+07	1.40647e+07	2.93069e+07	2.66021e+07	1.56155e+07	1.05694e+07	3.38488e+07	5.50591e+07	1.94958e+07	2.15313e+07	1.1806e+07	2.31101e+07
cbdbA1138	Q3ZY99	Uncharacterized protein OS=Dehalococcoides mccartyi (strain CBDB1) GN=cbdbA1138 PE=4 SV=1	FALSE	0	79.188	100	9	157	9	1	72	8.1	4.83	High	Not Found	High	High	High	High	High	High	High	High	High	High	3.66462e+07		32280821	298599396	2.71919e+08	3.83771e+07	1.72047e+08	1.25306e+08	1.27591e+08	10703539	3.28009e+07	5.37175e+07
cbdbA1194	Q3ZYF2	ATP-dependent DNA helicase RecG OS=Dehalococcoides mccartyi (strain CBDB1) GN=recG PE=4 SV=1	FALSE	0	79.033	25	15	49	15	1	740	82.6	9.25	High	Not Found	Not Found	High	High	High	High	High	Not Found	Not Found	Not Found	High	8.73571e+06			8.41954e+06	2.40858e+06	5.30612e+06	3.83904e+07	2.25911e+07				1.39182e+07
cbdbA72	Q3ZWB8	DNA repair protein radA OS=Dehalococcoides mccartyi (strain CBDB1) GN=radA PE=3 SV=1	FALSE	0	79.019	40	15	79	15	1	464	49.4	6.58	Not Found	Not Found	Not Found	High	High	High	High	High	High	Not Found	Not Found	High				48334434	8.01733e+07	3.01299e+06	5.76207e+07	6.36385e+07	4.83312e+07			2.24419e+07
cbdbA680	Q3ZX70	Pyruvic-ferredoxin oxidoreductase, delta subunit OS=Dehalococcoides mccartyi (strain CBDB1) GN=porD PE=4 SV=1	FALSE	0	78.955	71	6	252	6	1	86	9.5	5.38	High	High	High	High	High	High	High	High	High	High	High	High	6.50402e+07	4.66878e+07		2.95123e+08	4.1183e+08	5.19547e+07	6.24375e+08	1.02341e+09	8.05702e+08		943414	7.88888e+07
cbdbA1167	Q3ZYC4	Uncharacterized protein OS=Dehalococcoides mccartyi (strain CBDB1) GN=cbdbA1167 PE=4 SV=1	FALSE	0	78.876	39	10	95	10	1	155	18.5	8.85	High	High	High	High	High	High	High	High	High	Not Found	High	High	1.40364e+07	5.22241e+06	3.92229e+06	3.36494e+07	1.50298e+08	7.45894e+06	1.4585e+08	5.43612e+07	1.38631e+08		5.79199e+06	4.58109e+07
cbdbA400	Q3ZZK4	Probable transcriptional regulatory protein cbdbA400 OS=Dehalococcoides mccartyi (strain CBDB1) GN=cbdbA400 PE=3 SV=1	FALSE	0	78.872	52	10	99	10	1	251	27.2	5.01	Not Found	Not Found	Not Found	High	High	Not Found	High	High	High	Not Found	Not Found	High				6.90269e+07	7.11943e+07		4.16762e+07	5.23967e+07	7.6281e+07			3.57677e+07
cbdbA165	Q3ZWN4	Phosphate import ATP-binding protein PstB OS=Dehalococcoides mccartyi (strain CBDB1) GN=pstB PE=3 SV=1	FALSE	0	78.502	71	14	81	14	1	251	28.3	7.9	High	High	High	High	High	High	High	High	High	Not Found	High	High		8.51035e+06	6.48931e+06	2.84765e+07	4.06982e+07	1.88206e+07	1.90352e+07	8.4281e+07	5.62358e+07		3.16024e+06	2.19067e+07
cbdbA448	Q3ZZL5	30S ribosomal protein S17 OS=Dehalococcoides mccartyi (strain CBDB1) GN=rpsQ PE=3 SV=1	FALSE	0	78.461	56	8	240	8	1	90	10.5	9.8	High	High	High	High	High	High	High	High	High	Not Found	High	High		1.29522e+07	8.79518e+06	9.86055e+08	1.21394e+09	2.99089e+07	5.35382e+08	5.83038e+08	5.29121e+08		1.71428e+07	3.40094e+08
cbdbA527	Q3ZZU8	DNA primase OS=Dehalococcoides mccartyi (strain CBDB1) GN=dnaG PE=3 SV=1	FALSE	0	77.892	28	15	92	15	1	588	67	6.33	High	High	Not Found	High	High	High	High	High	High	Not Found	Not Found	High	7.06734e+06	6.92394e+06		6.34924e+07	5.91849e+07	1.53487e+07	6.81595e+07	1.78725e+07	3.94279e+07			1.97499e+07
cbdbA1211	Q3ZYI6	Transcription-repair-coupling factor OS=Dehalococcoides mccartyi (strain CBDB1) GN=mfd PE=3 SV=1	FALSE	0	77.48	18	17	80	17	1	1148	128.3	5.85	High	High	Not Found	High	High	High	High	High	High	Not Found	High	High	2.73255e+06	5.39432e+06		2.27298e+07	3.20174e+07	8.80362e+06	3.84696e+07	8.38757e+06	1.45663e+07		7.88394e+06	7.06944e+06
cbdbA200	Q3ZWQ2	Pyrroline-5-carboxylate reductase OS=Dehalococcoides mccartyi (strain CBDB1) GN=proC PE=3 SV=1	FALSE	0	77.079	36	12	134	12	1	267	27.7	8.78	High	High	Not Found	High	High	High	High	High	High	Not Found	Not Found	High	7.56949e+06	9.98272e+06		2.12337e+08	1.86948e+08	6.87673e+06	1.07912e+08	1.0633e+08	1.94742e+08			4.51474e+07
cbdbA1136	Q3ZYA1	HAD-superfamily hydrolase, subfamily IIB OS=Dehalococcoides mccartyi (strain CBDB1) GN=cbdbA1136 PE=4 SV=1	FALSE	0	76.888	50	12	86	12	1	271	30.1	5.1	High	High	Not Found	High	High	High	High	High	High	Not Found	High	High	7.34605e+06	7.34399e+06		2.39851e+07	3.45884e+07	7.273e+06	1.62499e+07	7.38313e+07	4.87249e+07		2.46451e+06	3.84927e+06
cbdbA415	Q3ZZJ3	HIT domain protein OS=Dehalococcoides mccartyi (strain CBDB1) GN=cbdbA415 PE=4 SV=1	FALSE	0	76.841	76	7	114	7	1	113	12.3	6.37	High	High	High	High	High	High	High	High	High	Not Found	High	High	2.08439e+07	2.77003e+07	5.64374e+07	8.14825e+07	1.3348e+08	3.26862e+07	1.31362e+08	5.72102e+07	1.82728e+08		1.08699e+07	6.90718e+07
cbdbA103	Q3ZWI5	Uncharacterized protein OS=Dehalococcoides mccartyi (strain CBDB1) GN=cbdbA103 PE=4 SV=1	FALSE	0	76.818	38	11	53	11	1	384	44.3	6.47	Not Found	High	High	Not Found	High	High	High	High	High	High	Not Found	High		3.58899e+06	1.01121e+07		9.42911e+06	6.59009e+06	1.33915e+07	4.29398e+07	4.33377e+07	6.70514e+06		2.44356e+07
cbdbA633	Q3ZX60	ABC-type cobalamin/Fe3+-siderophores transport system, periplasmic component OS=Dehalococcoides mccartyi (strain CBDB1) GN=fecB PE=4 SV=1	FALSE	0	76.354	39	11	153	11	1	337	35.5	4.69	High	High	High	High	High	High	High	High	High	Not Found	High	High	2.11651e+07	2.80178e+07	4.1455e+07	3.42071e+08	3.48252e+08	1.40148e+07	1.4502e+08	2.40493e+08	1.63071e+08		2.26945e+07	1.39219e+08
cbdbA985	Q3ZXZ6	ACT domain protein OS=Dehalococcoides mccartyi (strain CBDB1) GN=cbdbA985 PE=4 SV=1	FALSE	0	75.589	72	8	174	8	1	129	14.1	5.11	High	High	High	High	High	High	High	High	High	Not Found	High	High	7.91482e+07	8.3309e+07		5.20087e+08	3.75029e+08	8.99224e+07	3.24896e+08	2.30564e+08	5.81147e+08		5.00267e+07	2.00288e+08
cbdbA176	Q3ZWM5	Uncharacterized protein OS=Dehalococcoides mccartyi (strain CBDB1) GN=cbdbA176 PE=4 SV=1	FALSE	0	75.486	67	4	218	4	1	86	9.7	5.02	High	High	High	High	High	High	High	High	High	High	High	High	1.0978e+08	7.14877e+07	9.21607e+07	3.44936e+08	2.80812e+08	7.05932e+07	4.56309e+08	2.67244e+08	3.53376e+08	4.70041e+07	4.35703e+07	2.35625e+08
cbdbA834	Q3ZXL0	ABC transproter, ATP-binding protein OS=Dehalococcoides mccartyi (strain CBDB1) GN=cbdbA834 PE=4 SV=1	FALSE	0	75.445	45	11	90	11	1	298	33	6.73	High	High	High	High	High	High	High	High	High	Not Found	High	High	7.85253e+06	6.70399e+06	7.3801e+06	1.21069e+08	1.14702e+08	1.12099e+07	5.6687e+07	2.2301e+07	1.04792e+08		1.06821e+07	8.37822e+06
cbdbA616	Q3ZX32	D-ala D-alanine ligase OS=Dehalococcoides mccartyi (strain CBDB1) GN=ddl PE=4 SV=1	FALSE	0	75.21	41	11	91	11	1	338	37.1	5.14	Not Found	Not Found	Not Found	High	High	Not Found	High	High	High	Not Found	Not Found	High				8.39588e+07	1.69809e+08		4.40052e+07	7.02153e+07	2.06509e+08			3.12052e+07
cbdbA510	Q3ZZR3	Uncharacterized protein OS=Dehalococcoides mccartyi (strain CBDB1) GN=cbdbA510 PE=4 SV=1	FALSE	0	74.744	51	15	90	15	1	277	31.3	5.66	Not Found	Not Found	Not Found	High	High	Not Found	High	High	High	Not Found	Not Found	High				9.08618e+07	2.21497e+08		2.4941e+07	8.64684e+07	6.51391e+07			2.29322e+07
cbdbA1303	Q3ZYQ6	Pilin biogenesis protein OS=Dehalococcoides mccartyi (strain CBDB1) GN=pilC PE=3 SV=1	FALSE	0	74.651	29	11	109	11	1	401	43.8	8.95	High	High	High	High	High	High	High	High	High	Not Found	High	High	2.92921e+07	1.95299e+07	2.49004e+06	8.8951e+07	9.7335e+07	2.44612e+07	3.13584e+07	1.87536e+07	1.54277e+07		1.64086e+07	2.79056e+07
cbdbA670	Q3ZX78	Elongation factor P OS=Dehalococcoides mccartyi (strain CBDB1) GN=efp PE=3 SV=1	FALSE	0	74.298	61	9	54	9	1	186	21	6.04	Not Found	High	Not Found	High	High	High	High	High	High	Not Found	High	High		4.16014e+06		4.02182e+07	7.6283e+07	5.52697e+06	1.61531e+07	7.691e+06	4.47198e+07		3.8169e+06	6.82033e+06
cbdbA908	Q3ZXT2	Copper-translocating P-type ATPase OS=Dehalococcoides mccartyi (strain CBDB1) GN=cbdbA908 PE=3 SV=1	FALSE	0	74.24	24	16	47	16	1	828	89	8.37	Not Found	Not Found	High	High	High	High	High	High	High	Not Found	High	High			2.99384e+06	8.86596e+06	2.93422e+07	5.88777e+06	1.14062e+07	2.06068e+07	3.38065e+07		3.80779e+06	5.63471e+06
cbdbA989	Q3ZXZ4	Sensor histidine kinase/response regulator OS=Dehalococcoides mccartyi (strain CBDB1) GN=cbdbA989 PE=4 SV=1	FALSE	0	74.123	13	14	51	13	1	1262	142.6	6.37	Not Found	High	Not Found	High	High	High	High	High	High	Not Found	High	High		1.24666e+07		1.07645e+07	1.14696e+07	1.72234e+07	1.95249e+07	1.69147e+07	5.75733e+06		3.41249e+06	1.02172e+07
cbdbA371	Q3ZZI0	Amino acid ABC transporter, periplasmic aminoacid-binding protein OS=Dehalococcoides mccartyi (strain CBDB1) GN=cbdbA371 PE=4 SV=1	FALSE	0	74.098	27	8	209	8	1	257	27.9	4.67	Not Found	High	High	High	High	High	High	High	High	Not Found	High	High		1.49597e+07	4.03401e+07	1.01676e+09	2.90696e+08	9.95444e+06	4.20067e+08	710929194	3.84591e+08		3.19948e+07	1.84729e+08
cbdbA447	Q3ZZL6	50S ribosomal protein L29 OS=Dehalococcoides mccartyi (strain CBDB1) GN=rpmC PE=3 SV=1	FALSE	0	74.013	82	9	147	8	1	65	7.8	9.98	Not Found	Not Found	High	High	High	Not Found	High	High	High	Not Found	Not Found	High				3.49658e+08	3.03186e+08		1.70047e+08	3.93998e+08	1.8164e+08			6.73339e+07
cbdbA101	Q3ZWI7	Uncharacterized protein OS=Dehalococcoides mccartyi (strain CBDB1) GN=cbdbA101 PE=4 SV=1	FALSE	0	73.439	43	14	56	14	1	298	34.1	6.54	Not Found	Not Found	Not Found	High	High	Not Found	High	High	High	Not Found	Not Found	High				14269818	3.91576e+07		7.35719e+07	3.62672e+07	4.67384e+06			2.35205e+07
cbdbA588	Q3ZWZ9	Holliday junction ATP-dependent DNA helicase RuvB OS=Dehalococcoides mccartyi (strain CBDB1) GN=ruvB PE=3 SV=1	FALSE	0	72.687	49	14	74	14	1	349	38.8	7.27	High	High	Not Found	High	High	High	High	High	High	Not Found	Not Found	High	4.56398e+06	4.34018e+06		1.97672e+07	1.29721e+07	5.70445e+06	1.49985e+07	1.33434e+07	5.03285e+07			3.51543e+07
cbdbA59	Q3ZWC7	Uncharacterized protein OS=Dehalococcoides mccartyi (strain CBDB1) GN=cbdbA59 PE=4 SV=1	FALSE	0	72.379	59	5	87	5	1	80	9.1	7.28	Not Found	High	Not Found	High	High	Not Found	High	High	High	Not Found	High	High		1.1849e+07		6.43082e+07	8.84013e+07		7.05453e+07	1.00692e+08	2.60384e+06		8.39344e+06	1.8199e+07
cbdbA1178	Q3ZYG5	Twitching mobility protein OS=Dehalococcoides mccartyi (strain CBDB1) GN=pilT PE=4 SV=1	FALSE	0	72.235	46	15	75	13	1	358	39.8	6.62	High	High	High	High	High	High	High	High	High	Not Found	High	High	3.03467e+07	3.57578e+07	1.5767e+07	1.3043e+07	9.08473e+06	3.08559e+07	2.25074e+07	4.02413e+07	6.29328e+06		1.67736e+07	1.11972e+07
cbdbA1125	Q3ZYB1	Nucleotidyl transferase family protein OS=Dehalococcoides mccartyi (strain CBDB1) GN=cbdbA1125 PE=4 SV=1	FALSE	0	72.164	55	13	119	13	1	361	39.2	5.63	High	High	Not Found	High	High	High	High	High	High	Not Found	High	High	7.01919e+06	7.90658e+06		8.7874e+07	9.35989e+07	7.15732e+06	5.2315e+07	6.33239e+07	4.19693e+07		8.98782e+06	3.97675e+07
cbdbA1092	Q3ZY94	Putative reductive dehalogenase OS=Dehalococcoides mccartyi (strain CBDB1) GN=rdhA PE=4 SV=1	FALSE	0	71.831	32	12	21	12	1	532	58.6	6.68	High	Not Found	Not Found	Not Found	High	High	High	Not Found	Not Found	Not Found	Not Found	Not Found	3.61975e+07					1.92428e+07	5.47484e+07
cbdbA1543	Q3ZVT2	Sensor histidine kinase OS=Dehalococcoides mccartyi (strain CBDB1) GN=rdhC PE=4 SV=1	FALSE	0	71.785	28	11	64	11	1	537	60.9	7.17	Not Found	Not Found	Not Found	High	High	Not Found	High	High	High	Not Found	High	High				5.46138e+07	3.96337e+07		3.19241e+07	1.99093e+07	1.4552e+07		1.32662e+06	9.46325e+06
cbdbA1638	Q3ZW45	Putative reductive dehalogenase OS=Dehalococcoides mccartyi (strain CBDB1) GN=rdhA PE=4 SV=1	FALSE	0	71.739	39	13	32	13	1	500	54.8	6.4	Not Found	High	Not Found	Not Found	High	Not Found	High	High	Not Found	Not Found	Not Found	High		867751			4.831e+06		5.2828e+06	5.26393e+07				5.12589e+06
cbdbA159	Q3ZWN9	Sensor histidine kinase OS=Dehalococcoides mccartyi (strain CBDB1) GN=cbdbA159 PE=4 SV=1	FALSE	0	71.56	25	12	77	11	1	581	63.2	6.1	High	High	Not Found	High	High	High	High	High	High	Not Found	High	High	6043857	3.95443e+06		3.26193e+07	1.6912e+07	1.70117e+07	3.25319e+07	49537192	1.83406e+07			1.45202e+07
cbdbA1422	Q3ZYY9	Uncharacterized protein OS=Dehalococcoides mccartyi (strain CBDB1) GN=cbdbA1422 PE=4 SV=1	FALSE	0	71.539	96	7	162	7	1	67	7.4	7.8	High	High	High	High	High	High	High	High	High	High	High	High	3.60765e+07	5.13108e+07	1.15134e+08	1.76121e+08	2.38049e+08	6.92869e+07	1.82444e+08	2.24105e+08	2.51809e+08	1.11202e+08	7.492e+07	1.30223e+08
cbdbA428	Q3ZZK9	Shikimate kinase OS=Dehalococcoides mccartyi (strain CBDB1) GN=aroK PE=3 SV=1	FALSE	0	71.495	70	9	51	9	1	176	19.9	6.67	Not Found	High	Not Found	High	High	High	High	High	Not Found	Not Found	Not Found	High		1.47507e+07		1.46228e+08	1.71881e+08	7.23256e+06	5.0918e+06	7.40824e+07				1.24664e+07
cbdbA562	Q3ZWX2	Nucleoid-associated protein cbdbA562 OS=Dehalococcoides mccartyi (strain CBDB1) GN=cbdbA562 PE=3 SV=1	FALSE	0	71.467	69	8	156	8	1	99	10.9	9.31	Not Found	Not Found	High	High	High	High	High	High	High	Not Found	High	High			1.71846e+07	5.82364e+08	6.86506e+08	5.42845e+06	3.47157e+08	4.40645e+08	5.23106e+08		8.31276e+06	2.39816e+08
cbdbA1458	Q3ZZ03	Peptide ABC transporter, ATP-binding protein OS=Dehalococcoides mccartyi (strain CBDB1) GN=cbdbA1458 PE=3 SV=1	FALSE	0	71.321	55	13	88	13	1	311	34.6	7.4	High	High	High	High	High	High	High	High	High	Not Found	High	High	3.32391e+07	2.85116e+07	2.52057e+07	2.70851e+07	2.26209e+07	6.45006e+07	1.87003e+07	2.0285e+07	1.35638e+07		6.03824e+07	9.03085e+06
cbdbA911	Q3ZXT0	Bacterioferritin domain protein OS=Dehalococcoides mccartyi (strain CBDB1) GN=cbdbA911 PE=4 SV=1	FALSE	0	71.311	41	10	65	10	1	275	32	5.57	High	Not Found	High	High	High	High	High	High	High	Not Found	High	High	1.11937e+07		6.39307e+06	2.15361e+07	1.05446e+07	2.64587e+07	7.93563e+07	2.607e+07	4.04726e+07		9.76715e+06	2.90486e+07
cbdbA1720	Q3ZZX7	Putative desulforedoxin OS=Dehalococcoides mccartyi (strain CBDB1) GN=cbdbA1720 PE=4 SV=1	FALSE	0	71.137	87	9	210	9	1	55	5.9	6.44	High	High	High	High	High	High	High	High	High	High	Not Found	High	9.73843e+06	4.5862e+06	2.55325e+07	4.25728e+08	4.01108e+08	1.08548e+07	7.03369e+08	4.9521e+08	1.2486e+09	1.48577e+07		4.41271e+08
cbdbA1418	Q3ZYZ3	Uncharacterized protein OS=Dehalococcoides mccartyi (strain CBDB1) GN=cbdbA1418 PE=4 SV=1	FALSE	0	71.136	66	8	103	8	1	133	15.1	8.62	High	High	Not Found	High	High	High	High	High	High	Not Found	Not Found	High	9.23345e+06	6.00925e+07		6.21592e+07	3.6899e+07	2.46768e+07	4.68221e+07	6.40939e+07	3.4278e+07			5.46995e+07
cbdbA175	Q3ZWM6	Probable lysophospholipase OS=Dehalococcoides mccartyi (strain CBDB1) GN=cbdbA175 PE=4 SV=1	FALSE	0	70.997	32	9	59	9	1	277	31.1	7.66	Not Found	Not Found	Not Found	High	High	High	High	High	Not Found	Not Found	High	High				75573812	8.02598e+07	4.9312e+06	2.13174e+07	6.61466e+07			7.88193e+06	1.50887e+07
cbdbA560	Q3ZWX4	Magnesium and cobalt transport protein CorA OS=Dehalococcoides mccartyi (strain CBDB1) GN=corA PE=4 SV=1	FALSE	0	70.603	34	11	79	11	1	354	40.7	6.57	High	High	Not Found	High	High	High	High	High	High	Not Found	Not Found	High	7.64507e+07	8.95161e+07		2.59232e+07	4.70833e+07	1.0452e+08	7.54093e+07	8.24563e+07	2.71666e+07			6.1677e+07
cbdbA1086	Q3ZY52	ABC transporter, ATP-binding/permease protein OS=Dehalococcoides mccartyi (strain CBDB1) GN=cbdbA1086 PE=3 SV=1	FALSE	0	70.571	23	12	48	12	1	741	81.6	5.58	Not Found	Not Found	Not Found	High	High	High	High	High	High	Not Found	Not Found	High				8.34517e+06	1.09079e+07	5.67502e+06	1.62507e+07	1.54791e+07	1.2668e+07			1.18586e+07
[truncated: 560 more rows]
